# Supplementary material for: A hidden layer of structural variation in transposable elements reveals potential genetic modifiers in human disease-risk loci
Source: HighWire-hosted journal article supplement (doi:10.1101/gr.275515.121), 2022-03-24
Supplement: Supplemental_Table_S2.xlsx [file Supplemental_Table_S2.xlsx]

## Sheet: README
Supplemental Table S2: eQTL data for SNPs within LD blocks overlapping with SV-SVAs.
Data extracted from the GTEX eQTL portal (https://www.gtexportal.org/).

## Sheet: all
LD-block SNP	Gencode Id	Gene Symbol	Variant Id	SNP Id	P-Value	NES	Tissue
AD	ENSG00000136717.14	BIN1	chr2_127132061_G_A_b38	rs7561528	4.5e-08	-0.26	Colon - Sigmoid
AD	ENSG00000136717.14	BIN1	chr2_127132061_G_A_b38	rs7561528	2.5e-09	-0.27	Esophagus - Muscularis
AD	ENSG00000136717.14	BIN1	chr2_127132061_G_A_b38	rs7561528	1.5e-06	-0.3	Pancreas
AD	ENSG00000136717.14	BIN1	chr2_127130409_C_A_b38	rs12989701	3.4e-16	-0.31	Artery - Tibial
AD	ENSG00000136717.14	BIN1	chr2_127130409_C_A_b38	rs12989701	4.4e-14	-0.47	Colon - Sigmoid
AD	ENSG00000136717.14	BIN1	chr2_127130409_C_A_b38	rs12989701	2.4e-08	-0.33	Colon - Transverse
AD	ENSG00000136717.14	BIN1	chr2_127130409_C_A_b38	rs12989701	8.3e-07	-0.3	Esophagus - Gastroesophageal Junction
AD	ENSG00000136717.14	BIN1	chr2_127130409_C_A_b38	rs12989701	6.4e-14	-0.28	Esophagus - Mucosa
AD	ENSG00000136717.14	BIN1	chr2_127130409_C_A_b38	rs12989701	1.6e-11	-0.39	Esophagus - Muscularis
AD	ENSG00000136717.14	BIN1	chr2_127130409_C_A_b38	rs12989701	9.3e-20	-0.64	Heart - Left Ventricle
AD	ENSG00000136717.14	BIN1	chr2_127130409_C_A_b38	rs12989701	1.1e-06	-0.33	Liver
AD	ENSG00000136717.14	BIN1	chr2_127130409_C_A_b38	rs12989701	1.7e-25	-0.79	Pancreas
AD	ENSG00000136717.14	BIN1	chr2_127130409_C_A_b38	rs12989701	7.3e-05	-0.31	Pituitary
AD	ENSG00000136717.14	BIN1	chr2_127130409_C_A_b38	rs12989701	7.9e-07	-0.16	Skin - Not Sun Exposed (Suprapubic)
AD	ENSG00000136717.14	BIN1	chr2_127130409_C_A_b38	rs12989701	9.3e-09	-0.17	Skin - Sun Exposed (Lower leg)
AD	ENSG00000136717.14	BIN1	chr2_127130409_C_A_b38	rs12989701	2.9e-08	-0.38	Stomach
AD	ENSG00000136717.14	BIN1	chr2_127130409_C_A_b38	rs12989701	1.8e-06	-0.32	Testis
AD	ENSG00000136717.14	BIN1	chr2_127130409_C_A_b38	rs12989701	1.6e-12	-0.34	Thyroid
AD	ENSG00000136717.14	BIN1	chr2_127130409_C_A_b38	rs12989701	3.4e-11	-0.18	Whole Blood
AD	ENSG00000136717.14	BIN1	chr2_127128582_C_T_b38	rs13025717	5.1e-06	-0.14	Artery - Tibial
AD	ENSG00000136717.14	BIN1	chr2_127128582_C_T_b38	rs13025717	5.5e-06	-0.22	Colon - Sigmoid
AD	ENSG00000136717.14	BIN1	chr2_127128582_C_T_b38	rs13025717	5.5e-07	-0.23	Esophagus - Muscularis
AD	ENSG00000136717.14	BIN1	chr2_127128582_C_T_b38	rs13025717	3.2e-10	-0.36	Heart - Left Ventricle
AD	ENSG00000136717.14	BIN1	chr2_127128582_C_T_b38	rs13025717	3.5e-05	-0.23	Liver
AD	ENSG00000136717.14	BIN1	chr2_127128582_C_T_b38	rs13025717	8.9e-20	-0.52	Pancreas
AD	ENSG00000136717.14	BIN1	chr2_127128582_C_T_b38	rs13025717	8.1e-06	-0.25	Stomach
AD	ENSG00000136717.14	BIN1	chr2_127128582_C_T_b38	rs13025717	9.5e-08	-0.2	Thyroid
AD	ENSG00000136717.14	BIN1	chr2_127128582_C_T_b38	rs13025717	7.5e-05	-0.084	Whole Blood
AD	ENSG00000237541.3	HLA-DQA2	chr6_32615580_A_T_b38	rs6931277	2.9e-66	1.2	Adipose - Subcutaneous
AD	ENSG00000229391.7	HLA-DRB6	chr6_32615580_A_T_b38	rs6931277	1.7e-31	0.85	Adipose - Subcutaneous
AD	ENSG00000179344.16	HLA-DQB1	chr6_32615580_A_T_b38	rs6931277	8.6e-15	-0.51	Adipose - Subcutaneous
AD	ENSG00000196735.11	HLA-DQA1	chr6_32615580_A_T_b38	rs6931277	2.4e-14	-0.4	Adipose - Subcutaneous
AD	ENSG00000196126.11	HLA-DRB1	chr6_32615580_A_T_b38	rs6931277	3e-10	-0.29	Adipose - Subcutaneous
AD	ENSG00000241106.6	HLA-DOB	chr6_32615580_A_T_b38	rs6931277	1.6e-07	0.33	Adipose - Subcutaneous
AD	ENSG00000225914.1	XXbac-BPG154L12.4	chr6_32615580_A_T_b38	rs6931277	1.5e-06	0.35	Adipose - Subcutaneous
AD	ENSG00000204314.10	PRRT1	chr6_32615580_A_T_b38	rs6931277	1.6e-05	0.14	Adipose - Subcutaneous
AD	ENSG00000232629.8	HLA-DQB2	chr6_32615580_A_T_b38	rs6931277	1.8e-05	0.34	Adipose - Subcutaneous
AD	ENSG00000223534.1	HLA-DQB1-AS1	chr6_32615580_A_T_b38	rs6931277	1.9e-05	-0.26	Adipose - Subcutaneous
AD	ENSG00000237541.3	HLA-DQA2	chr6_32615580_A_T_b38	rs6931277	1.4e-54	1.3	Adipose - Visceral (Omentum)
AD	ENSG00000229391.7	HLA-DRB6	chr6_32615580_A_T_b38	rs6931277	6e-31	0.93	Adipose - Visceral (Omentum)
AD	ENSG00000179344.16	HLA-DQB1	chr6_32615580_A_T_b38	rs6931277	5.9e-11	-0.5	Adipose - Visceral (Omentum)
AD	ENSG00000196301.3	HLA-DRB9	chr6_32615580_A_T_b38	rs6931277	8.1e-08	0.46	Adipose - Visceral (Omentum)
AD	ENSG00000223534.1	HLA-DQB1-AS1	chr6_32615580_A_T_b38	rs6931277	6e-07	-0.33	Adipose - Visceral (Omentum)
AD	ENSG00000241106.6	HLA-DOB	chr6_32615580_A_T_b38	rs6931277	1.5e-05	0.33	Adipose - Visceral (Omentum)
AD	ENSG00000196126.11	HLA-DRB1	chr6_32615580_A_T_b38	rs6931277	1.8e-05	-0.23	Adipose - Visceral (Omentum)
AD	ENSG00000237541.3	HLA-DQA2	chr6_32615580_A_T_b38	rs6931277	5.6e-27	1.2	Adrenal Gland
AD	ENSG00000229391.7	HLA-DRB6	chr6_32615580_A_T_b38	rs6931277	4.6e-11	0.83	Adrenal Gland
AD	ENSG00000241106.6	HLA-DOB	chr6_32615580_A_T_b38	rs6931277	3.5e-06	0.56	Adrenal Gland
AD	ENSG00000232629.8	HLA-DQB2	chr6_32615580_A_T_b38	rs6931277	4e-06	0.59	Adrenal Gland
AD	ENSG00000237541.3	HLA-DQA2	chr6_32615580_A_T_b38	rs6931277	4.5e-46	1.1	Artery - Aorta
AD	ENSG00000229391.7	HLA-DRB6	chr6_32615580_A_T_b38	rs6931277	2.1e-20	0.64	Artery - Aorta
AD	ENSG00000232629.8	HLA-DQB2	chr6_32615580_A_T_b38	rs6931277	6.2e-09	0.46	Artery - Aorta
AD	ENSG00000196735.11	HLA-DQA1	chr6_32615580_A_T_b38	rs6931277	9.7e-08	-0.29	Artery - Aorta
AD	ENSG00000241106.6	HLA-DOB	chr6_32615580_A_T_b38	rs6931277	2.7e-07	0.4	Artery - Aorta
AD	ENSG00000196126.11	HLA-DRB1	chr6_32615580_A_T_b38	rs6931277	8.4e-05	-0.17	Artery - Aorta
AD	ENSG00000179344.16	HLA-DQB1	chr6_32615580_A_T_b38	rs6931277	8.9e-05	-0.26	Artery - Aorta
AD	ENSG00000237541.3	HLA-DQA2	chr6_32615580_A_T_b38	rs6931277	3.4e-24	1.1	Artery - Coronary
AD	ENSG00000229391.7	HLA-DRB6	chr6_32615580_A_T_b38	rs6931277	8.5e-12	0.67	Artery - Coronary
AD	ENSG00000237541.3	HLA-DQA2	chr6_32615580_A_T_b38	rs6931277	2.7e-66	1.1	Artery - Tibial
AD	ENSG00000229391.7	HLA-DRB6	chr6_32615580_A_T_b38	rs6931277	3.1e-31	0.63	Artery - Tibial
AD	ENSG00000196735.11	HLA-DQA1	chr6_32615580_A_T_b38	rs6931277	1.1e-13	-0.31	Artery - Tibial
AD	ENSG00000232629.8	HLA-DQB2	chr6_32615580_A_T_b38	rs6931277	1e-12	0.45	Artery - Tibial
AD	ENSG00000196126.11	HLA-DRB1	chr6_32615580_A_T_b38	rs6931277	7.7e-10	-0.2	Artery - Tibial
AD	ENSG00000179344.16	HLA-DQB1	chr6_32615580_A_T_b38	rs6931277	1.9e-09	-0.33	Artery - Tibial
AD	ENSG00000241106.6	HLA-DOB	chr6_32615580_A_T_b38	rs6931277	3.1e-08	0.36	Artery - Tibial
AD	ENSG00000204338.8	CYP21A1P	chr6_32615580_A_T_b38	rs6931277	6.4e-07	0.32	Artery - Tibial
AD	ENSG00000204463.12	BAG6	chr6_32615580_A_T_b38	rs6931277	0.00023	0.16	Artery - Tibial
AD	ENSG00000237541.3	HLA-DQA2	chr6_32615580_A_T_b38	rs6931277	8.2e-16	1	Brain - Amygdala
AD	ENSG00000229391.7	HLA-DRB6	chr6_32615580_A_T_b38	rs6931277	4.9e-07	0.57	Brain - Amygdala
AD	ENSG00000237541.3	HLA-DQA2	chr6_32615580_A_T_b38	rs6931277	8.2e-14	0.98	Brain - Anterior cingulate cortex (BA24)
AD	ENSG00000196126.11	HLA-DRB1	chr6_32615580_A_T_b38	rs6931277	5.3e-11	-0.59	Brain - Anterior cingulate cortex (BA24)
AD	ENSG00000229391.7	HLA-DRB6	chr6_32615580_A_T_b38	rs6931277	1.5e-08	0.64	Brain - Anterior cingulate cortex (BA24)
AD	ENSG00000237541.3	HLA-DQA2	chr6_32615580_A_T_b38	rs6931277	1.5e-20	1.1	Brain - Caudate (basal ganglia)
AD	ENSG00000229391.7	HLA-DRB6	chr6_32615580_A_T_b38	rs6931277	1e-11	0.72	Brain - Caudate (basal ganglia)
AD	ENSG00000196126.11	HLA-DRB1	chr6_32615580_A_T_b38	rs6931277	2e-05	-0.31	Brain - Caudate (basal ganglia)
AD	ENSG00000179344.16	HLA-DQB1	chr6_32615580_A_T_b38	rs6931277	3.1e-05	-0.46	Brain - Caudate (basal ganglia)
AD	ENSG00000237541.3	HLA-DQA2	chr6_32615580_A_T_b38	rs6931277	1.9e-14	0.98	Brain - Cerebellar Hemisphere
AD	ENSG00000229391.7	HLA-DRB6	chr6_32615580_A_T_b38	rs6931277	4.7e-10	0.73	Brain - Cerebellar Hemisphere
AD	ENSG00000196126.11	HLA-DRB1	chr6_32615580_A_T_b38	rs6931277	1.7e-05	-0.41	Brain - Cerebellar Hemisphere
AD	ENSG00000237541.3	HLA-DQA2	chr6_32615580_A_T_b38	rs6931277	4.1e-16	0.9	Brain - Cerebellum
AD	ENSG00000229391.7	HLA-DRB6	chr6_32615580_A_T_b38	rs6931277	4.6e-10	0.71	Brain - Cerebellum
AD	ENSG00000196126.11	HLA-DRB1	chr6_32615580_A_T_b38	rs6931277	4.8e-06	-0.43	Brain - Cerebellum
AD	ENSG00000179344.16	HLA-DQB1	chr6_32615580_A_T_b38	rs6931277	7.3e-06	-0.49	Brain - Cerebellum
AD	ENSG00000237541.3	HLA-DQA2	chr6_32615580_A_T_b38	rs6931277	4e-16	1	Brain - Cortex
AD	ENSG00000196126.11	HLA-DRB1	chr6_32615580_A_T_b38	rs6931277	1.2e-08	-0.48	Brain - Cortex
AD	ENSG00000229391.7	HLA-DRB6	chr6_32615580_A_T_b38	rs6931277	2.1e-07	0.58	Brain - Cortex
AD	ENSG00000232629.8	HLA-DQB2	chr6_32615580_A_T_b38	rs6931277	1e-06	0.67	Brain - Cortex
AD	ENSG00000234515.1	PPP1R2P1	chr6_32615580_A_T_b38	rs6931277	5.9e-05	-0.46	Brain - Cortex
AD	ENSG00000237541.3	HLA-DQA2	chr6_32615580_A_T_b38	rs6931277	7.3e-18	0.99	Brain - Frontal Cortex (BA9)
AD	ENSG00000229391.7	HLA-DRB6	chr6_32615580_A_T_b38	rs6931277	2.4e-10	0.58	Brain - Frontal Cortex (BA9)
AD	ENSG00000196126.11	HLA-DRB1	chr6_32615580_A_T_b38	rs6931277	1.5e-05	-0.36	Brain - Frontal Cortex (BA9)
AD	ENSG00000237541.3	HLA-DQA2	chr6_32615580_A_T_b38	rs6931277	8.2e-15	0.95	Brain - Hippocampus
AD	ENSG00000229391.7	HLA-DRB6	chr6_32615580_A_T_b38	rs6931277	9.7e-09	0.7	Brain - Hippocampus
AD	ENSG00000232629.8	HLA-DQB2	chr6_32615580_A_T_b38	rs6931277	2.6e-08	0.68	Brain - Hippocampus
AD	ENSG00000237541.3	HLA-DQA2	chr6_32615580_A_T_b38	rs6931277	4.7e-18	1	Brain - Hypothalamus
AD	ENSG00000229391.7	HLA-DRB6	chr6_32615580_A_T_b38	rs6931277	2.7e-10	0.76	Brain - Hypothalamus
AD	ENSG00000196126.11	HLA-DRB1	chr6_32615580_A_T_b38	rs6931277	2.3e-05	-0.29	Brain - Hypothalamus
AD	ENSG00000232629.8	HLA-DQB2	chr6_32615580_A_T_b38	rs6931277	3.5e-05	0.56	Brain - Hypothalamus
AD	ENSG00000237541.3	HLA-DQA2	chr6_32615580_A_T_b38	rs6931277	2.2e-23	1	Brain - Nucleus accumbens (basal ganglia)
AD	ENSG00000229391.7	HLA-DRB6	chr6_32615580_A_T_b38	rs6931277	6.9e-11	0.65	Brain - Nucleus accumbens (basal ganglia)
AD	ENSG00000232629.8	HLA-DQB2	chr6_32615580_A_T_b38	rs6931277	5.6e-06	0.45	Brain - Nucleus accumbens (basal ganglia)
AD	ENSG00000196126.11	HLA-DRB1	chr6_32615580_A_T_b38	rs6931277	6.8e-05	-0.3	Brain - Nucleus accumbens (basal ganglia)
AD	ENSG00000237541.3	HLA-DQA2	chr6_32615580_A_T_b38	rs6931277	2.1e-16	1	Brain - Putamen (basal ganglia)
AD	ENSG00000229391.7	HLA-DRB6	chr6_32615580_A_T_b38	rs6931277	7.2e-09	0.76	Brain - Putamen (basal ganglia)
AD	ENSG00000196126.11	HLA-DRB1	chr6_32615580_A_T_b38	rs6931277	6.6e-06	-0.43	Brain - Putamen (basal ganglia)
AD	ENSG00000179344.16	HLA-DQB1	chr6_32615580_A_T_b38	rs6931277	5.6e-05	-0.53	Brain - Putamen (basal ganglia)
AD	ENSG00000237541.3	HLA-DQA2	chr6_32615580_A_T_b38	rs6931277	1.8e-13	1.1	Brain - Spinal cord (cervical c-1)
AD	ENSG00000229391.7	HLA-DRB6	chr6_32615580_A_T_b38	rs6931277	2.5e-10	0.79	Brain - Spinal cord (cervical c-1)
AD	ENSG00000232629.8	HLA-DQB2	chr6_32615580_A_T_b38	rs6931277	2.2e-05	0.68	Brain - Spinal cord (cervical c-1)
AD	ENSG00000237541.3	HLA-DQA2	chr6_32615580_A_T_b38	rs6931277	3.5e-11	1	Brain - Substantia nigra
AD	ENSG00000229391.7	HLA-DRB6	chr6_32615580_A_T_b38	rs6931277	1.4e-06	0.7	Brain - Substantia nigra
AD	ENSG00000196126.11	HLA-DRB1	chr6_32615580_A_T_b38	rs6931277	1.4e-05	-0.37	Brain - Substantia nigra
AD	ENSG00000237541.3	HLA-DQA2	chr6_32615580_A_T_b38	rs6931277	1.4e-39	1.2	Breast - Mammary Tissue
AD	ENSG00000229391.7	HLA-DRB6	chr6_32615580_A_T_b38	rs6931277	3.7e-22	0.79	Breast - Mammary Tissue
AD	ENSG00000179344.16	HLA-DQB1	chr6_32615580_A_T_b38	rs6931277	2.6e-09	-0.45	Breast - Mammary Tissue
AD	ENSG00000196735.11	HLA-DQA1	chr6_32615580_A_T_b38	rs6931277	3.4e-06	-0.3	Breast - Mammary Tissue
AD	ENSG00000241106.6	HLA-DOB	chr6_32615580_A_T_b38	rs6931277	3.1e-05	0.31	Breast - Mammary Tissue
AD	ENSG00000241106.6	HLA-DOB	chr6_32615580_A_T_b38	rs6931277	3.1e-08	0.34	Cells - Cultured fibroblasts
AD	ENSG00000225914.1	XXbac-BPG154L12.4	chr6_32615580_A_T_b38	rs6931277	5.3e-05	0.31	Cells - Cultured fibroblasts
AD	ENSG00000204304.11	PBX2	chr6_32615580_A_T_b38	rs6931277	6e-05	0.12	Cells - Cultured fibroblasts
AD	ENSG00000204267.13	TAP2	chr6_32615580_A_T_b38	rs6931277	0.00012	-0.12	Cells - Cultured fibroblasts
AD	ENSG00000237541.3	HLA-DQA2	chr6_32615580_A_T_b38	rs6931277	5.6e-17	1.2	Cells - EBV-transformed lymphocytes
AD	ENSG00000196735.11	HLA-DQA1	chr6_32615580_A_T_b38	rs6931277	1.3e-11	-0.91	Cells - EBV-transformed lymphocytes
AD	ENSG00000232629.8	HLA-DQB2	chr6_32615580_A_T_b38	rs6931277	2.2e-07	0.78	Cells - EBV-transformed lymphocytes
AD	ENSG00000237541.3	HLA-DQA2	chr6_32615580_A_T_b38	rs6931277	7.9e-38	1.2	Colon - Sigmoid
AD	ENSG00000229391.7	HLA-DRB6	chr6_32615580_A_T_b38	rs6931277	9e-26	1	Colon - Sigmoid
AD	ENSG00000241106.6	HLA-DOB	chr6_32615580_A_T_b38	rs6931277	1.1e-06	0.44	Colon - Sigmoid
AD	ENSG00000196126.11	HLA-DRB1	chr6_32615580_A_T_b38	rs6931277	4.4e-06	0.31	Colon - Sigmoid
AD	ENSG00000237541.3	HLA-DQA2	chr6_32615580_A_T_b38	rs6931277	7.5e-37	1	Colon - Transverse
AD	ENSG00000229391.7	HLA-DRB6	chr6_32615580_A_T_b38	rs6931277	3.5e-20	0.75	Colon - Transverse
AD	ENSG00000232629.8	HLA-DQB2	chr6_32615580_A_T_b38	rs6931277	6e-08	0.47	Colon - Transverse
AD	ENSG00000196735.11	HLA-DQA1	chr6_32615580_A_T_b38	rs6931277	1.3e-06	-0.25	Colon - Transverse
AD	ENSG00000241106.6	HLA-DOB	chr6_32615580_A_T_b38	rs6931277	4.8e-05	0.21	Colon - Transverse
AD	ENSG00000179344.16	HLA-DQB1	chr6_32615580_A_T_b38	rs6931277	0.00012	-0.29	Colon - Transverse
AD	ENSG00000237541.3	HLA-DQA2	chr6_32615580_A_T_b38	rs6931277	1.3e-40	1.2	Esophagus - Gastroesophageal Junction
AD	ENSG00000229391.7	HLA-DRB6	chr6_32615580_A_T_b38	rs6931277	2e-21	0.85	Esophagus - Gastroesophageal Junction
AD	ENSG00000179344.16	HLA-DQB1	chr6_32615580_A_T_b38	rs6931277	1.5e-08	-0.52	Esophagus - Gastroesophageal Junction
AD	ENSG00000241106.6	HLA-DOB	chr6_32615580_A_T_b38	rs6931277	8.7e-06	0.43	Esophagus - Gastroesophageal Junction
AD	ENSG00000237541.3	HLA-DQA2	chr6_32615580_A_T_b38	rs6931277	1.3e-48	0.98	Esophagus - Mucosa
AD	ENSG00000229391.7	HLA-DRB6	chr6_32615580_A_T_b38	rs6931277	2.4e-21	0.64	Esophagus - Mucosa
AD	ENSG00000196735.11	HLA-DQA1	chr6_32615580_A_T_b38	rs6931277	3.2e-17	-0.41	Esophagus - Mucosa
AD	ENSG00000179344.16	HLA-DQB1	chr6_32615580_A_T_b38	rs6931277	2.5e-08	-0.37	Esophagus - Mucosa
AD	ENSG00000196126.11	HLA-DRB1	chr6_32615580_A_T_b38	rs6931277	5.8e-08	-0.22	Esophagus - Mucosa
AD	ENSG00000241106.6	HLA-DOB	chr6_32615580_A_T_b38	rs6931277	7.6e-06	0.29	Esophagus - Mucosa
AD	ENSG00000204338.8	CYP21A1P	chr6_32615580_A_T_b38	rs6931277	5.2e-05	0.3	Esophagus - Mucosa
AD	ENSG00000237541.3	HLA-DQA2	chr6_32615580_A_T_b38	rs6931277	1.9e-58	1.2	Esophagus - Muscularis
AD	ENSG00000229391.7	HLA-DRB6	chr6_32615580_A_T_b38	rs6931277	8.1e-33	0.9	Esophagus - Muscularis
AD	ENSG00000179344.16	HLA-DQB1	chr6_32615580_A_T_b38	rs6931277	1.6e-10	-0.49	Esophagus - Muscularis
AD	ENSG00000241106.6	HLA-DOB	chr6_32615580_A_T_b38	rs6931277	1.9e-10	0.49	Esophagus - Muscularis
AD	ENSG00000196126.11	HLA-DRB1	chr6_32615580_A_T_b38	rs6931277	1.8e-07	0.27	Esophagus - Muscularis
AD	ENSG00000204463.12	BAG6	chr6_32615580_A_T_b38	rs6931277	1.1e-05	0.15	Esophagus - Muscularis
AD	ENSG00000204338.8	CYP21A1P	chr6_32615580_A_T_b38	rs6931277	1.5e-05	0.26	Esophagus - Muscularis
AD	ENSG00000196735.11	HLA-DQA1	chr6_32615580_A_T_b38	rs6931277	2.1e-05	-0.3	Esophagus - Muscularis
AD	ENSG00000198502.5	HLA-DRB5	chr6_32615580_A_T_b38	rs6931277	5.6e-05	0.34	Esophagus - Muscularis
AD	ENSG00000237541.3	HLA-DQA2	chr6_32615580_A_T_b38	rs6931277	3.2e-37	1.1	Heart - Atrial Appendage
AD	ENSG00000229391.7	HLA-DRB6	chr6_32615580_A_T_b38	rs6931277	7.3e-22	0.84	Heart - Atrial Appendage
AD	ENSG00000196126.11	HLA-DRB1	chr6_32615580_A_T_b38	rs6931277	4.6e-05	-0.3	Heart - Atrial Appendage
AD	ENSG00000179344.16	HLA-DQB1	chr6_32615580_A_T_b38	rs6931277	0.00013	-0.36	Heart - Atrial Appendage
AD	ENSG00000237541.3	HLA-DQA2	chr6_32615580_A_T_b38	rs6931277	2.2e-43	1.2	Heart - Left Ventricle
AD	ENSG00000229391.7	HLA-DRB6	chr6_32615580_A_T_b38	rs6931277	2.4e-22	0.8	Heart - Left Ventricle
AD	ENSG00000179344.16	HLA-DQB1	chr6_32615580_A_T_b38	rs6931277	5.2e-07	-0.41	Heart - Left Ventricle
AD	ENSG00000237541.3	HLA-DQA2	chr6_32615580_A_T_b38	rs6931277	1.9e-08	1.3	Kidney - Cortex
AD	ENSG00000237541.3	HLA-DQA2	chr6_32615580_A_T_b38	rs6931277	2.4e-28	1.2	Liver
AD	ENSG00000229391.7	HLA-DRB6	chr6_32615580_A_T_b38	rs6931277	1.9e-12	0.82	Liver
AD	ENSG00000232629.8	HLA-DQB2	chr6_32615580_A_T_b38	rs6931277	1.2e-05	0.53	Liver
AD	ENSG00000237541.3	HLA-DQA2	chr6_32615580_A_T_b38	rs6931277	2.6e-66	1.2	Lung
AD	ENSG00000229391.7	HLA-DRB6	chr6_32615580_A_T_b38	rs6931277	7.3e-32	0.82	Lung
AD	ENSG00000232629.8	HLA-DQB2	chr6_32615580_A_T_b38	rs6931277	4.7e-13	0.5	Lung
AD	ENSG00000196735.11	HLA-DQA1	chr6_32615580_A_T_b38	rs6931277	8.1e-12	-0.35	Lung
AD	ENSG00000196126.11	HLA-DRB1	chr6_32615580_A_T_b38	rs6931277	8.5e-12	-0.28	Lung
AD	ENSG00000196301.3	HLA-DRB9	chr6_32615580_A_T_b38	rs6931277	6e-06	0.32	Lung
AD	ENSG00000179344.16	HLA-DQB1	chr6_32615580_A_T_b38	rs6931277	4.5e-05	-0.24	Lung
AD	ENSG00000241106.6	HLA-DOB	chr6_32615580_A_T_b38	rs6931277	6.3e-05	0.26	Lung
AD	ENSG00000237541.3	HLA-DQA2	chr6_32615580_A_T_b38	rs6931277	1.1e-15	1.3	Minor Salivary Gland
AD	ENSG00000229391.7	HLA-DRB6	chr6_32615580_A_T_b38	rs6931277	2.9e-06	0.73	Minor Salivary Gland
AD	ENSG00000237541.3	HLA-DQA2	chr6_32615580_A_T_b38	rs6931277	3.6e-83	1.2	Muscle - Skeletal
AD	ENSG00000229391.7	HLA-DRB6	chr6_32615580_A_T_b38	rs6931277	1.1e-43	0.85	Muscle - Skeletal
AD	ENSG00000179344.16	HLA-DQB1	chr6_32615580_A_T_b38	rs6931277	8.1e-17	-0.49	Muscle - Skeletal
AD	ENSG00000223534.1	HLA-DQB1-AS1	chr6_32615580_A_T_b38	rs6931277	1.1e-11	-0.42	Muscle - Skeletal
AD	ENSG00000196126.11	HLA-DRB1	chr6_32615580_A_T_b38	rs6931277	3e-11	-0.26	Muscle - Skeletal
AD	ENSG00000241106.6	HLA-DOB	chr6_32615580_A_T_b38	rs6931277	2.3e-08	0.35	Muscle - Skeletal
AD	ENSG00000196735.11	HLA-DQA1	chr6_32615580_A_T_b38	rs6931277	3.9e-06	-0.23	Muscle - Skeletal
AD	ENSG00000213676.10	ATF6B	chr6_32615580_A_T_b38	rs6931277	2.1e-05	0.13	Muscle - Skeletal
AD	ENSG00000232629.8	HLA-DQB2	chr6_32615580_A_T_b38	rs6931277	0.00018	0.25	Muscle - Skeletal
AD	ENSG00000237541.3	HLA-DQA2	chr6_32615580_A_T_b38	rs6931277	9.8e-67	1.2	Nerve - Tibial
AD	ENSG00000229391.7	HLA-DRB6	chr6_32615580_A_T_b38	rs6931277	6.9e-34	0.83	Nerve - Tibial
AD	ENSG00000232629.8	HLA-DQB2	chr6_32615580_A_T_b38	rs6931277	6.4e-14	0.57	Nerve - Tibial
AD	ENSG00000196735.11	HLA-DQA1	chr6_32615580_A_T_b38	rs6931277	1.8e-09	-0.31	Nerve - Tibial
AD	ENSG00000179344.16	HLA-DQB1	chr6_32615580_A_T_b38	rs6931277	2.2e-09	-0.4	Nerve - Tibial
AD	ENSG00000241106.6	HLA-DOB	chr6_32615580_A_T_b38	rs6931277	5.9e-08	0.44	Nerve - Tibial
AD	ENSG00000204338.8	CYP21A1P	chr6_32615580_A_T_b38	rs6931277	2.7e-06	0.34	Nerve - Tibial
AD	ENSG00000196126.11	HLA-DRB1	chr6_32615580_A_T_b38	rs6931277	3.1e-06	-0.18	Nerve - Tibial
AD	ENSG00000196301.3	HLA-DRB9	chr6_32615580_A_T_b38	rs6931277	6.6e-06	0.33	Nerve - Tibial
AD	ENSG00000204463.12	BAG6	chr6_32615580_A_T_b38	rs6931277	3.8e-05	0.14	Nerve - Tibial
AD	ENSG00000204301.6	NOTCH4	chr6_32615580_A_T_b38	rs6931277	0.00015	0.17	Nerve - Tibial
AD	ENSG00000228962.1	HCG23	chr6_32615580_A_T_b38	rs6931277	0.00026	0.22	Nerve - Tibial
AD	ENSG00000237541.3	HLA-DQA2	chr6_32615580_A_T_b38	rs6931277	2e-16	1.1	Ovary
AD	ENSG00000229391.7	HLA-DRB6	chr6_32615580_A_T_b38	rs6931277	6e-08	0.66	Ovary
AD	ENSG00000241106.6	HLA-DOB	chr6_32615580_A_T_b38	rs6931277	3.8e-05	0.62	Ovary
AD	ENSG00000237541.3	HLA-DQA2	chr6_32615580_A_T_b38	rs6931277	2.3e-30	1	Pancreas
AD	ENSG00000229391.7	HLA-DRB6	chr6_32615580_A_T_b38	rs6931277	1.1e-14	0.68	Pancreas
AD	ENSG00000232629.8	HLA-DQB2	chr6_32615580_A_T_b38	rs6931277	1.7e-08	0.54	Pancreas
AD	ENSG00000196126.11	HLA-DRB1	chr6_32615580_A_T_b38	rs6931277	4.3e-06	-0.27	Pancreas
AD	ENSG00000224389.8	C4B	chr6_32615580_A_T_b38	rs6931277	3.6e-05	-0.24	Pancreas
AD	ENSG00000237541.3	HLA-DQA2	chr6_32615580_A_T_b38	rs6931277	2.4e-24	1.1	Pituitary
AD	ENSG00000229391.7	HLA-DRB6	chr6_32615580_A_T_b38	rs6931277	9.7e-14	0.7	Pituitary
AD	ENSG00000196735.11	HLA-DQA1	chr6_32615580_A_T_b38	rs6931277	6.9e-07	-0.37	Pituitary
AD	ENSG00000232629.8	HLA-DQB2	chr6_32615580_A_T_b38	rs6931277	3.9e-06	0.53	Pituitary
AD	ENSG00000237541.3	HLA-DQA2	chr6_32615580_A_T_b38	rs6931277	2.1e-28	1.2	Prostate
AD	ENSG00000229391.7	HLA-DRB6	chr6_32615580_A_T_b38	rs6931277	5.6e-12	0.79	Prostate
AD	ENSG00000196126.11	HLA-DRB1	chr6_32615580_A_T_b38	rs6931277	6.8e-06	-0.33	Prostate
AD	ENSG00000237541.3	HLA-DQA2	chr6_32615580_A_T_b38	rs6931277	8.8e-50	0.88	Skin - Not Sun Exposed (Suprapubic)
AD	ENSG00000196735.11	HLA-DQA1	chr6_32615580_A_T_b38	rs6931277	1.7e-31	-0.61	Skin - Not Sun Exposed (Suprapubic)
AD	ENSG00000229391.7	HLA-DRB6	chr6_32615580_A_T_b38	rs6931277	6.5e-25	0.77	Skin - Not Sun Exposed (Suprapubic)
AD	ENSG00000196126.11	HLA-DRB1	chr6_32615580_A_T_b38	rs6931277	1.3e-17	-0.37	Skin - Not Sun Exposed (Suprapubic)
AD	ENSG00000241106.6	HLA-DOB	chr6_32615580_A_T_b38	rs6931277	7e-08	0.41	Skin - Not Sun Exposed (Suprapubic)
AD	ENSG00000179344.16	HLA-DQB1	chr6_32615580_A_T_b38	rs6931277	2.9e-07	-0.35	Skin - Not Sun Exposed (Suprapubic)
AD	ENSG00000204314.10	PRRT1	chr6_32615580_A_T_b38	rs6931277	5.5e-06	0.22	Skin - Not Sun Exposed (Suprapubic)
AD	ENSG00000196301.3	HLA-DRB9	chr6_32615580_A_T_b38	rs6931277	1.5e-05	0.34	Skin - Not Sun Exposed (Suprapubic)
AD	ENSG00000237541.3	HLA-DQA2	chr6_32615580_A_T_b38	rs6931277	3.6e-76	1	Skin - Sun Exposed (Lower leg)
AD	ENSG00000196735.11	HLA-DQA1	chr6_32615580_A_T_b38	rs6931277	9e-41	-0.67	Skin - Sun Exposed (Lower leg)
AD	ENSG00000229391.7	HLA-DRB6	chr6_32615580_A_T_b38	rs6931277	1.5e-29	0.74	Skin - Sun Exposed (Lower leg)
AD	ENSG00000196126.11	HLA-DRB1	chr6_32615580_A_T_b38	rs6931277	8.1e-23	-0.38	Skin - Sun Exposed (Lower leg)
AD	ENSG00000179344.16	HLA-DQB1	chr6_32615580_A_T_b38	rs6931277	1.9e-13	-0.49	Skin - Sun Exposed (Lower leg)
AD	ENSG00000241106.6	HLA-DOB	chr6_32615580_A_T_b38	rs6931277	6.8e-11	0.45	Skin - Sun Exposed (Lower leg)
AD	ENSG00000237541.3	HLA-DQA2	chr6_32615580_A_T_b38	rs6931277	9.4e-18	1	Small Intestine - Terminal Ileum
AD	ENSG00000229391.7	HLA-DRB6	chr6_32615580_A_T_b38	rs6931277	6e-08	0.65	Small Intestine - Terminal Ileum
AD	ENSG00000232629.8	HLA-DQB2	chr6_32615580_A_T_b38	rs6931277	7.3e-06	0.47	Small Intestine - Terminal Ileum
AD	ENSG00000237541.3	HLA-DQA2	chr6_32615580_A_T_b38	rs6931277	8e-30	1.1	Spleen
AD	ENSG00000196735.11	HLA-DQA1	chr6_32615580_A_T_b38	rs6931277	4.5e-14	-0.49	Spleen
AD	ENSG00000229391.7	HLA-DRB6	chr6_32615580_A_T_b38	rs6931277	1.3e-11	0.75	Spleen
AD	ENSG00000196126.11	HLA-DRB1	chr6_32615580_A_T_b38	rs6931277	3.4e-07	-0.3	Spleen
AD	ENSG00000232629.8	HLA-DQB2	chr6_32615580_A_T_b38	rs6931277	3.3e-05	0.45	Spleen
AD	ENSG00000237541.3	HLA-DQA2	chr6_32615580_A_T_b38	rs6931277	1.5e-36	1	Stomach
AD	ENSG00000229391.7	HLA-DRB6	chr6_32615580_A_T_b38	rs6931277	3.1e-15	0.57	Stomach
AD	ENSG00000232629.8	HLA-DQB2	chr6_32615580_A_T_b38	rs6931277	1.2e-08	0.5	Stomach
AD	ENSG00000179344.16	HLA-DQB1	chr6_32615580_A_T_b38	rs6931277	3.5e-07	-0.45	Stomach
AD	ENSG00000241106.6	HLA-DOB	chr6_32615580_A_T_b38	rs6931277	7.9e-05	0.27	Stomach
AD	ENSG00000237541.3	HLA-DQA2	chr6_32615580_A_T_b38	rs6931277	7.3e-31	1.1	Testis
AD	ENSG00000229391.7	HLA-DRB6	chr6_32615580_A_T_b38	rs6931277	1.7e-12	0.6	Testis
AD	ENSG00000232629.8	HLA-DQB2	chr6_32615580_A_T_b38	rs6931277	2.5e-09	0.62	Testis
AD	ENSG00000196126.11	HLA-DRB1	chr6_32615580_A_T_b38	rs6931277	7.5e-06	-0.36	Testis
AD	ENSG00000204338.8	CYP21A1P	chr6_32615580_A_T_b38	rs6931277	8.4e-06	0.41	Testis
AD	ENSG00000196735.11	HLA-DQA1	chr6_32615580_A_T_b38	rs6931277	1.7e-05	-0.32	Testis
AD	ENSG00000237541.3	HLA-DQA2	chr6_32615580_A_T_b38	rs6931277	3.4e-61	1.1	Thyroid
AD	ENSG00000229391.7	HLA-DRB6	chr6_32615580_A_T_b38	rs6931277	8.7e-34	0.83	Thyroid
AD	ENSG00000179344.16	HLA-DQB1	chr6_32615580_A_T_b38	rs6931277	3e-10	-0.41	Thyroid
AD	ENSG00000196126.11	HLA-DRB1	chr6_32615580_A_T_b38	rs6931277	2.7e-09	-0.27	Thyroid
AD	ENSG00000196735.11	HLA-DQA1	chr6_32615580_A_T_b38	rs6931277	4e-08	-0.28	Thyroid
AD	ENSG00000196301.3	HLA-DRB9	chr6_32615580_A_T_b38	rs6931277	5.1e-08	0.4	Thyroid
AD	ENSG00000232629.8	HLA-DQB2	chr6_32615580_A_T_b38	rs6931277	8e-06	0.31	Thyroid
AD	ENSG00000241106.6	HLA-DOB	chr6_32615580_A_T_b38	rs6931277	0.00011	0.21	Thyroid
AD	ENSG00000237541.3	HLA-DQA2	chr6_32615580_A_T_b38	rs6931277	1.8e-18	1.2	Uterus
AD	ENSG00000229391.7	HLA-DRB6	chr6_32615580_A_T_b38	rs6931277	9.7e-10	0.82	Uterus
AD	ENSG00000237541.3	HLA-DQA2	chr6_32615580_A_T_b38	rs6931277	2.5e-14	1	Vagina
AD	ENSG00000229391.7	HLA-DRB6	chr6_32615580_A_T_b38	rs6931277	3.6e-08	0.74	Vagina
AD	ENSG00000237541.3	HLA-DQA2	chr6_32615580_A_T_b38	rs6931277	9.5e-72	1.1	Whole Blood
AD	ENSG00000229391.7	HLA-DRB6	chr6_32615580_A_T_b38	rs6931277	1.2e-22	0.55	Whole Blood
AD	ENSG00000232629.8	HLA-DQB2	chr6_32615580_A_T_b38	rs6931277	1.1e-21	0.55	Whole Blood
AD	ENSG00000196126.11	HLA-DRB1	chr6_32615580_A_T_b38	rs6931277	1.4e-14	-0.18	Whole Blood
AD	ENSG00000179344.16	HLA-DQB1	chr6_32615580_A_T_b38	rs6931277	9e-13	-0.33	Whole Blood
AD	ENSG00000196735.11	HLA-DQA1	chr6_32615580_A_T_b38	rs6931277	5.7e-10	-0.18	Whole Blood
AD	ENSG00000204338.8	CYP21A1P	chr6_32615580_A_T_b38	rs6931277	5.9e-08	0.32	Whole Blood
AD	ENSG00000196301.3	HLA-DRB9	chr6_32615580_A_T_b38	rs6931277	1.5e-06	0.27	Whole Blood
AD	ENSG00000223534.1	HLA-DQB1-AS1	chr6_32615580_A_T_b38	rs6931277	9.3e-06	-0.18	Whole Blood
AD	ENSG00000240053.8	LY6G5B	chr6_32615580_A_T_b38	rs6931277	4e-05	-0.096	Whole Blood
AD	ENSG00000241106.6	HLA-DOB	chr6_32615580_A_T_b38	rs6931277	7.9e-05	0.14	Whole Blood
AD	ENSG00000198502.5	HLA-DRB5	chr6_32610753_C_A_b38	rs9271192	3.7e-58	-0.83	Adipose - Subcutaneous
AD	ENSG00000179344.16	HLA-DQB1	chr6_32610753_C_A_b38	rs9271192	1.6e-48	-0.74	Adipose - Subcutaneous
AD	ENSG00000232629.8	HLA-DQB2	chr6_32610753_C_A_b38	rs9271192	3.4e-48	0.86	Adipose - Subcutaneous
AD	ENSG00000196301.3	HLA-DRB9	chr6_32610753_C_A_b38	rs9271192	2.5e-41	0.77	Adipose - Subcutaneous
AD	ENSG00000229391.7	HLA-DRB6	chr6_32610753_C_A_b38	rs9271192	9.5e-41	0.8	Adipose - Subcutaneous
AD	ENSG00000196126.11	HLA-DRB1	chr6_32610753_C_A_b38	rs9271192	1.4e-38	-0.46	Adipose - Subcutaneous
AD	ENSG00000237541.3	HLA-DQA2	chr6_32610753_C_A_b38	rs9271192	4.4e-38	0.82	Adipose - Subcutaneous
AD	ENSG00000223534.1	HLA-DQB1-AS1	chr6_32610753_C_A_b38	rs9271192	5.7e-15	-0.39	Adipose - Subcutaneous
AD	ENSG00000196735.11	HLA-DQA1	chr6_32610753_C_A_b38	rs9271192	7.2e-14	-0.33	Adipose - Subcutaneous
AD	ENSG00000204301.6	NOTCH4	chr6_32610753_C_A_b38	rs9271192	1.2e-10	-0.17	Adipose - Subcutaneous
AD	ENSG00000244731.7	C4A	chr6_32610753_C_A_b38	rs9271192	1.5e-08	-0.28	Adipose - Subcutaneous
AD	ENSG00000204463.12	BAG6	chr6_32610753_C_A_b38	rs9271192	2.7e-05	0.11	Adipose - Subcutaneous
AD	ENSG00000204305.13	AGER	chr6_32610753_C_A_b38	rs9271192	9.1e-05	0.13	Adipose - Subcutaneous
AD	ENSG00000225914.1	XXbac-BPG154L12.4	chr6_32610753_C_A_b38	rs9271192	0.00011	0.24	Adipose - Subcutaneous
AD	ENSG00000198502.5	HLA-DRB5	chr6_32610753_C_A_b38	rs9271192	4e-37	-0.81	Adipose - Visceral (Omentum)
AD	ENSG00000196301.3	HLA-DRB9	chr6_32610753_C_A_b38	rs9271192	5.3e-33	0.81	Adipose - Visceral (Omentum)
AD	ENSG00000232629.8	HLA-DQB2	chr6_32610753_C_A_b38	rs9271192	5.5e-33	0.81	Adipose - Visceral (Omentum)
AD	ENSG00000229391.7	HLA-DRB6	chr6_32610753_C_A_b38	rs9271192	6.4e-31	0.78	Adipose - Visceral (Omentum)
AD	ENSG00000237541.3	HLA-DQA2	chr6_32610753_C_A_b38	rs9271192	1.4e-29	0.84	Adipose - Visceral (Omentum)
AD	ENSG00000179344.16	HLA-DQB1	chr6_32610753_C_A_b38	rs9271192	8.7e-25	-0.63	Adipose - Visceral (Omentum)
AD	ENSG00000196126.11	HLA-DRB1	chr6_32610753_C_A_b38	rs9271192	1e-17	-0.37	Adipose - Visceral (Omentum)
AD	ENSG00000196735.11	HLA-DQA1	chr6_32610753_C_A_b38	rs9271192	8.4e-12	-0.37	Adipose - Visceral (Omentum)
AD	ENSG00000204301.6	NOTCH4	chr6_32610753_C_A_b38	rs9271192	3.3e-10	-0.22	Adipose - Visceral (Omentum)
AD	ENSG00000223534.1	HLA-DQB1-AS1	chr6_32610753_C_A_b38	rs9271192	4.8e-09	-0.32	Adipose - Visceral (Omentum)
AD	ENSG00000240065.7	PSMB9	chr6_32610753_C_A_b38	rs9271192	1.5e-06	0.18	Adipose - Visceral (Omentum)
AD	ENSG00000237541.3	HLA-DQA2	chr6_32610753_C_A_b38	rs9271192	2.4e-15	0.8	Adrenal Gland
AD	ENSG00000198502.5	HLA-DRB5	chr6_32610753_C_A_b38	rs9271192	5.3e-15	-0.74	Adrenal Gland
AD	ENSG00000232629.8	HLA-DQB2	chr6_32610753_C_A_b38	rs9271192	6.2e-15	0.78	Adrenal Gland
AD	ENSG00000229391.7	HLA-DRB6	chr6_32610753_C_A_b38	rs9271192	1e-13	0.75	Adrenal Gland
AD	ENSG00000196301.3	HLA-DRB9	chr6_32610753_C_A_b38	rs9271192	1.4e-08	0.53	Adrenal Gland
AD	ENSG00000179344.16	HLA-DQB1	chr6_32610753_C_A_b38	rs9271192	9e-06	-0.41	Adrenal Gland
AD	ENSG00000198502.5	HLA-DRB5	chr6_32610753_C_A_b38	rs9271192	8e-39	-0.86	Artery - Aorta
AD	ENSG00000229391.7	HLA-DRB6	chr6_32610753_C_A_b38	rs9271192	2.8e-27	0.67	Artery - Aorta
AD	ENSG00000232629.8	HLA-DQB2	chr6_32610753_C_A_b38	rs9271192	2.8e-25	0.71	Artery - Aorta
AD	ENSG00000237541.3	HLA-DQA2	chr6_32610753_C_A_b38	rs9271192	1.4e-20	0.7	Artery - Aorta
AD	ENSG00000179344.16	HLA-DQB1	chr6_32610753_C_A_b38	rs9271192	2e-18	-0.51	Artery - Aorta
AD	ENSG00000196301.3	HLA-DRB9	chr6_32610753_C_A_b38	rs9271192	9e-17	0.58	Artery - Aorta
AD	ENSG00000196126.11	HLA-DRB1	chr6_32610753_C_A_b38	rs9271192	1.7e-10	-0.25	Artery - Aorta
AD	ENSG00000196735.11	HLA-DQA1	chr6_32610753_C_A_b38	rs9271192	3.8e-08	-0.28	Artery - Aorta
AD	ENSG00000223534.1	HLA-DQB1-AS1	chr6_32610753_C_A_b38	rs9271192	2.1e-07	-0.29	Artery - Aorta
AD	ENSG00000244731.7	C4A	chr6_32610753_C_A_b38	rs9271192	8.7e-05	-0.22	Artery - Aorta
AD	ENSG00000198502.5	HLA-DRB5	chr6_32610753_C_A_b38	rs9271192	3.5e-21	-0.83	Artery - Coronary
AD	ENSG00000229391.7	HLA-DRB6	chr6_32610753_C_A_b38	rs9271192	3e-16	0.65	Artery - Coronary
AD	ENSG00000232629.8	HLA-DQB2	chr6_32610753_C_A_b38	rs9271192	1e-15	0.68	Artery - Coronary
AD	ENSG00000237541.3	HLA-DQA2	chr6_32610753_C_A_b38	rs9271192	5.9e-12	0.67	Artery - Coronary
AD	ENSG00000196301.3	HLA-DRB9	chr6_32610753_C_A_b38	rs9271192	7.8e-10	0.53	Artery - Coronary
AD	ENSG00000179344.16	HLA-DQB1	chr6_32610753_C_A_b38	rs9271192	7e-09	-0.44	Artery - Coronary
AD	ENSG00000196126.11	HLA-DRB1	chr6_32610753_C_A_b38	rs9271192	8.5e-06	-0.23	Artery - Coronary
AD	ENSG00000198502.5	HLA-DRB5	chr6_32610753_C_A_b38	rs9271192	3e-60	-0.79	Artery - Tibial
AD	ENSG00000229391.7	HLA-DRB6	chr6_32610753_C_A_b38	rs9271192	2.1e-36	0.56	Artery - Tibial
AD	ENSG00000232629.8	HLA-DQB2	chr6_32610753_C_A_b38	rs9271192	1.8e-35	0.62	Artery - Tibial
AD	ENSG00000237541.3	HLA-DQA2	chr6_32610753_C_A_b38	rs9271192	2e-33	0.7	Artery - Tibial
AD	ENSG00000179344.16	HLA-DQB1	chr6_32610753_C_A_b38	rs9271192	3.5e-31	-0.5	Artery - Tibial
AD	ENSG00000196126.11	HLA-DRB1	chr6_32610753_C_A_b38	rs9271192	1.5e-24	-0.27	Artery - Tibial
AD	ENSG00000196735.11	HLA-DQA1	chr6_32610753_C_A_b38	rs9271192	3e-09	-0.21	Artery - Tibial
AD	ENSG00000223534.1	HLA-DQB1-AS1	chr6_32610753_C_A_b38	rs9271192	1.7e-07	-0.21	Artery - Tibial
AD	ENSG00000244731.7	C4A	chr6_32610753_C_A_b38	rs9271192	4.5e-06	-0.2	Artery - Tibial
AD	ENSG00000204308.7	RNF5	chr6_32610753_C_A_b38	rs9271192	1.8e-05	-0.12	Artery - Tibial
AD	ENSG00000204301.6	NOTCH4	chr6_32610753_C_A_b38	rs9271192	8.8e-05	-0.11	Artery - Tibial
AD	ENSG00000198502.5	HLA-DRB5	chr6_32610753_C_A_b38	rs9271192	1.4e-13	-0.73	Brain - Amygdala
AD	ENSG00000229391.7	HLA-DRB6	chr6_32610753_C_A_b38	rs9271192	3e-10	0.66	Brain - Amygdala
AD	ENSG00000196126.11	HLA-DRB1	chr6_32610753_C_A_b38	rs9271192	8.9e-08	-0.33	Brain - Amygdala
AD	ENSG00000179344.16	HLA-DQB1	chr6_32610753_C_A_b38	rs9271192	1.6e-07	-0.55	Brain - Amygdala
AD	ENSG00000237541.3	HLA-DQA2	chr6_32610753_C_A_b38	rs9271192	1.7e-07	0.67	Brain - Amygdala
AD	ENSG00000232629.8	HLA-DQB2	chr6_32610753_C_A_b38	rs9271192	5.5e-07	0.6	Brain - Amygdala
AD	ENSG00000198502.5	HLA-DRB5	chr6_32610753_C_A_b38	rs9271192	4.4e-13	-0.75	Brain - Anterior cingulate cortex (BA24)
AD	ENSG00000229391.7	HLA-DRB6	chr6_32610753_C_A_b38	rs9271192	6.2e-12	0.68	Brain - Anterior cingulate cortex (BA24)
AD	ENSG00000196126.11	HLA-DRB1	chr6_32610753_C_A_b38	rs9271192	1.8e-11	-0.54	Brain - Anterior cingulate cortex (BA24)
AD	ENSG00000237541.3	HLA-DQA2	chr6_32610753_C_A_b38	rs9271192	7.4e-10	0.74	Brain - Anterior cingulate cortex (BA24)
AD	ENSG00000232629.8	HLA-DQB2	chr6_32610753_C_A_b38	rs9271192	2e-07	0.68	Brain - Anterior cingulate cortex (BA24)
AD	ENSG00000179344.16	HLA-DQB1	chr6_32610753_C_A_b38	rs9271192	3.6e-06	-0.56	Brain - Anterior cingulate cortex (BA24)
AD	ENSG00000223534.1	HLA-DQB1-AS1	chr6_32610753_C_A_b38	rs9271192	2.3e-05	-0.55	Brain - Anterior cingulate cortex (BA24)
AD	ENSG00000198502.5	HLA-DRB5	chr6_32610753_C_A_b38	rs9271192	6e-22	-0.84	Brain - Caudate (basal ganglia)
AD	ENSG00000196126.11	HLA-DRB1	chr6_32610753_C_A_b38	rs9271192	1.6e-16	-0.45	Brain - Caudate (basal ganglia)
AD	ENSG00000229391.7	HLA-DRB6	chr6_32610753_C_A_b38	rs9271192	1.6e-13	0.63	Brain - Caudate (basal ganglia)
AD	ENSG00000179344.16	HLA-DQB1	chr6_32610753_C_A_b38	rs9271192	1.4e-11	-0.58	Brain - Caudate (basal ganglia)
AD	ENSG00000232629.8	HLA-DQB2	chr6_32610753_C_A_b38	rs9271192	3.9e-11	0.64	Brain - Caudate (basal ganglia)
AD	ENSG00000237541.3	HLA-DQA2	chr6_32610753_C_A_b38	rs9271192	5.4e-10	0.66	Brain - Caudate (basal ganglia)
AD	ENSG00000223534.1	HLA-DQB1-AS1	chr6_32610753_C_A_b38	rs9271192	1.2e-05	-0.4	Brain - Caudate (basal ganglia)
AD	ENSG00000198502.5	HLA-DRB5	chr6_32610753_C_A_b38	rs9271192	4e-16	-0.89	Brain - Cerebellar Hemisphere
AD	ENSG00000196126.11	HLA-DRB1	chr6_32610753_C_A_b38	rs9271192	7.5e-12	-0.57	Brain - Cerebellar Hemisphere
AD	ENSG00000229391.7	HLA-DRB6	chr6_32610753_C_A_b38	rs9271192	4.5e-10	0.67	Brain - Cerebellar Hemisphere
AD	ENSG00000179344.16	HLA-DQB1	chr6_32610753_C_A_b38	rs9271192	5.4e-10	-0.68	Brain - Cerebellar Hemisphere
AD	ENSG00000237541.3	HLA-DQA2	chr6_32610753_C_A_b38	rs9271192	4.2e-09	0.72	Brain - Cerebellar Hemisphere
AD	ENSG00000232629.8	HLA-DQB2	chr6_32610753_C_A_b38	rs9271192	5.1e-07	0.6	Brain - Cerebellar Hemisphere
AD	ENSG00000196126.11	HLA-DRB1	chr6_32610753_C_A_b38	rs9271192	4.2e-23	-0.72	Brain - Cerebellum
AD	ENSG00000198502.5	HLA-DRB5	chr6_32610753_C_A_b38	rs9271192	7.8e-20	-0.85	Brain - Cerebellum
AD	ENSG00000179344.16	HLA-DQB1	chr6_32610753_C_A_b38	rs9271192	1.2e-18	-0.77	Brain - Cerebellum
AD	ENSG00000232629.8	HLA-DQB2	chr6_32610753_C_A_b38	rs9271192	2.8e-10	0.65	Brain - Cerebellum
AD	ENSG00000237541.3	HLA-DQA2	chr6_32610753_C_A_b38	rs9271192	5.5e-10	0.62	Brain - Cerebellum
AD	ENSG00000229391.7	HLA-DRB6	chr6_32610753_C_A_b38	rs9271192	1.2e-07	0.53	Brain - Cerebellum
AD	ENSG00000223534.1	HLA-DQB1-AS1	chr6_32610753_C_A_b38	rs9271192	1.8e-06	-0.46	Brain - Cerebellum
AD	ENSG00000244731.7	C4A	chr6_32610753_C_A_b38	rs9271192	0.00012	-0.38	Brain - Cerebellum
AD	ENSG00000198502.5	HLA-DRB5	chr6_32610753_C_A_b38	rs9271192	1.8e-18	-0.79	Brain - Cortex
AD	ENSG00000196126.11	HLA-DRB1	chr6_32610753_C_A_b38	rs9271192	2.5e-15	-0.53	Brain - Cortex
AD	ENSG00000229391.7	HLA-DRB6	chr6_32610753_C_A_b38	rs9271192	3.7e-13	0.65	Brain - Cortex
AD	ENSG00000232629.8	HLA-DQB2	chr6_32610753_C_A_b38	rs9271192	7.8e-09	0.65	Brain - Cortex
AD	ENSG00000237541.3	HLA-DQA2	chr6_32610753_C_A_b38	rs9271192	1.1e-08	0.61	Brain - Cortex
AD	ENSG00000223534.1	HLA-DQB1-AS1	chr6_32610753_C_A_b38	rs9271192	3.4e-05	-0.42	Brain - Cortex
AD	ENSG00000198502.5	HLA-DRB5	chr6_32610753_C_A_b38	rs9271192	1.6e-18	-0.85	Brain - Frontal Cortex (BA9)
AD	ENSG00000196126.11	HLA-DRB1	chr6_32610753_C_A_b38	rs9271192	1.3e-12	-0.52	Brain - Frontal Cortex (BA9)
AD	ENSG00000229391.7	HLA-DRB6	chr6_32610753_C_A_b38	rs9271192	6.8e-10	0.53	Brain - Frontal Cortex (BA9)
AD	ENSG00000237541.3	HLA-DQA2	chr6_32610753_C_A_b38	rs9271192	3.2e-08	0.65	Brain - Frontal Cortex (BA9)
AD	ENSG00000232629.8	HLA-DQB2	chr6_32610753_C_A_b38	rs9271192	1.3e-07	0.66	Brain - Frontal Cortex (BA9)
AD	ENSG00000204287.13	HLA-DRA	chr6_32610753_C_A_b38	rs9271192	1.7e-05	-0.23	Brain - Frontal Cortex (BA9)
AD	ENSG00000198502.5	HLA-DRB5	chr6_32610753_C_A_b38	rs9271192	1.3e-15	-0.75	Brain - Hippocampus
AD	ENSG00000229391.7	HLA-DRB6	chr6_32610753_C_A_b38	rs9271192	7.3e-13	0.71	Brain - Hippocampus
AD	ENSG00000237541.3	HLA-DQA2	chr6_32610753_C_A_b38	rs9271192	3e-11	0.7	Brain - Hippocampus
AD	ENSG00000179344.16	HLA-DQB1	chr6_32610753_C_A_b38	rs9271192	2.2e-10	-0.57	Brain - Hippocampus
AD	ENSG00000232629.8	HLA-DQB2	chr6_32610753_C_A_b38	rs9271192	1.8e-09	0.62	Brain - Hippocampus
AD	ENSG00000196126.11	HLA-DRB1	chr6_32610753_C_A_b38	rs9271192	1e-06	-0.27	Brain - Hippocampus
AD	ENSG00000198502.5	HLA-DRB5	chr6_32610753_C_A_b38	rs9271192	2.1e-17	-0.8	Brain - Hypothalamus
AD	ENSG00000237541.3	HLA-DQA2	chr6_32610753_C_A_b38	rs9271192	8.1e-14	0.82	Brain - Hypothalamus
AD	ENSG00000229391.7	HLA-DRB6	chr6_32610753_C_A_b38	rs9271192	4.4e-13	0.75	Brain - Hypothalamus
AD	ENSG00000232629.8	HLA-DQB2	chr6_32610753_C_A_b38	rs9271192	1.7e-11	0.77	Brain - Hypothalamus
AD	ENSG00000179344.16	HLA-DQB1	chr6_32610753_C_A_b38	rs9271192	6.6e-10	-0.62	Brain - Hypothalamus
AD	ENSG00000196126.11	HLA-DRB1	chr6_32610753_C_A_b38	rs9271192	1.2e-08	-0.34	Brain - Hypothalamus
AD	ENSG00000223534.1	HLA-DQB1-AS1	chr6_32610753_C_A_b38	rs9271192	3.4e-05	-0.44	Brain - Hypothalamus
AD	ENSG00000229391.7	HLA-DRB6	chr6_32610753_C_A_b38	rs9271192	2.9e-15	0.69	Brain - Nucleus accumbens (basal ganglia)
AD	ENSG00000237541.3	HLA-DQA2	chr6_32610753_C_A_b38	rs9271192	6.2e-14	0.71	Brain - Nucleus accumbens (basal ganglia)
AD	ENSG00000198502.5	HLA-DRB5	chr6_32610753_C_A_b38	rs9271192	6.6e-14	-0.71	Brain - Nucleus accumbens (basal ganglia)
AD	ENSG00000196126.11	HLA-DRB1	chr6_32610753_C_A_b38	rs9271192	4.6e-13	-0.46	Brain - Nucleus accumbens (basal ganglia)
AD	ENSG00000179344.16	HLA-DQB1	chr6_32610753_C_A_b38	rs9271192	1.2e-10	-0.58	Brain - Nucleus accumbens (basal ganglia)
AD	ENSG00000232629.8	HLA-DQB2	chr6_32610753_C_A_b38	rs9271192	1.2e-10	0.55	Brain - Nucleus accumbens (basal ganglia)
AD	ENSG00000223534.1	HLA-DQB1-AS1	chr6_32610753_C_A_b38	rs9271192	5e-05	-0.41	Brain - Nucleus accumbens (basal ganglia)
AD	ENSG00000198502.5	HLA-DRB5	chr6_32610753_C_A_b38	rs9271192	8.3e-17	-0.88	Brain - Putamen (basal ganglia)
AD	ENSG00000196126.11	HLA-DRB1	chr6_32610753_C_A_b38	rs9271192	1.3e-14	-0.54	Brain - Putamen (basal ganglia)
AD	ENSG00000179344.16	HLA-DQB1	chr6_32610753_C_A_b38	rs9271192	8.6e-12	-0.67	Brain - Putamen (basal ganglia)
AD	ENSG00000229391.7	HLA-DRB6	chr6_32610753_C_A_b38	rs9271192	5.1e-10	0.64	Brain - Putamen (basal ganglia)
AD	ENSG00000232629.8	HLA-DQB2	chr6_32610753_C_A_b38	rs9271192	3.3e-09	0.58	Brain - Putamen (basal ganglia)
AD	ENSG00000237541.3	HLA-DQA2	chr6_32610753_C_A_b38	rs9271192	8.5e-08	0.56	Brain - Putamen (basal ganglia)
AD	ENSG00000198502.5	HLA-DRB5	chr6_32610753_C_A_b38	rs9271192	4.2e-13	-0.77	Brain - Spinal cord (cervical c-1)
AD	ENSG00000232629.8	HLA-DQB2	chr6_32610753_C_A_b38	rs9271192	8.6e-09	0.71	Brain - Spinal cord (cervical c-1)
AD	ENSG00000237541.3	HLA-DQA2	chr6_32610753_C_A_b38	rs9271192	2e-08	0.69	Brain - Spinal cord (cervical c-1)
AD	ENSG00000179344.16	HLA-DQB1	chr6_32610753_C_A_b38	rs9271192	3.4e-08	-0.57	Brain - Spinal cord (cervical c-1)
AD	ENSG00000229391.7	HLA-DRB6	chr6_32610753_C_A_b38	rs9271192	1.1e-06	0.5	Brain - Spinal cord (cervical c-1)
AD	ENSG00000196126.11	HLA-DRB1	chr6_32610753_C_A_b38	rs9271192	1.4e-05	-0.3	Brain - Spinal cord (cervical c-1)
AD	ENSG00000229391.7	HLA-DRB6	chr6_32610753_C_A_b38	rs9271192	1.3e-11	0.72	Brain - Substantia nigra
AD	ENSG00000237541.3	HLA-DQA2	chr6_32610753_C_A_b38	rs9271192	3.6e-11	0.78	Brain - Substantia nigra
AD	ENSG00000232629.8	HLA-DQB2	chr6_32610753_C_A_b38	rs9271192	9.3e-11	0.68	Brain - Substantia nigra
AD	ENSG00000198502.5	HLA-DRB5	chr6_32610753_C_A_b38	rs9271192	1.1e-10	-0.73	Brain - Substantia nigra
AD	ENSG00000179344.16	HLA-DQB1	chr6_32610753_C_A_b38	rs9271192	2.8e-08	-0.64	Brain - Substantia nigra
AD	ENSG00000198502.5	HLA-DRB5	chr6_32610753_C_A_b38	rs9271192	3.3e-35	-0.78	Breast - Mammary Tissue
AD	ENSG00000179344.16	HLA-DQB1	chr6_32610753_C_A_b38	rs9271192	1.1e-30	-0.69	Breast - Mammary Tissue
AD	ENSG00000232629.8	HLA-DQB2	chr6_32610753_C_A_b38	rs9271192	2.2e-24	0.8	Breast - Mammary Tissue
AD	ENSG00000229391.7	HLA-DRB6	chr6_32610753_C_A_b38	rs9271192	1.8e-23	0.7	Breast - Mammary Tissue
AD	ENSG00000237541.3	HLA-DQA2	chr6_32610753_C_A_b38	rs9271192	4.5e-20	0.77	Breast - Mammary Tissue
AD	ENSG00000196126.11	HLA-DRB1	chr6_32610753_C_A_b38	rs9271192	2.6e-17	-0.34	Breast - Mammary Tissue
AD	ENSG00000196301.3	HLA-DRB9	chr6_32610753_C_A_b38	rs9271192	7.8e-17	0.61	Breast - Mammary Tissue
AD	ENSG00000223534.1	HLA-DQB1-AS1	chr6_32610753_C_A_b38	rs9271192	9.6e-11	-0.39	Breast - Mammary Tissue
AD	ENSG00000196735.11	HLA-DQA1	chr6_32610753_C_A_b38	rs9271192	2.4e-10	-0.35	Breast - Mammary Tissue
AD	ENSG00000204301.6	NOTCH4	chr6_32610753_C_A_b38	rs9271192	2.6e-06	-0.12	Breast - Mammary Tissue
AD	ENSG00000204305.13	AGER	chr6_32610753_C_A_b38	rs9271192	7.4e-05	0.19	Breast - Mammary Tissue
AD	ENSG00000196126.11	HLA-DRB1	chr6_32610753_C_A_b38	rs9271192	2.7e-12	-0.42	Cells - Cultured fibroblasts
AD	ENSG00000198502.5	HLA-DRB5	chr6_32610753_C_A_b38	rs9271192	3.3e-05	-0.29	Cells - Cultured fibroblasts
AD	ENSG00000179344.16	HLA-DQB1	chr6_32610753_C_A_b38	rs9271192	0.00011	-0.28	Cells - Cultured fibroblasts
AD	ENSG00000204305.13	AGER	chr6_32610753_C_A_b38	rs9271192	0.00017	0.15	Cells - Cultured fibroblasts
AD	ENSG00000244731.7	C4A	chr6_32610753_C_A_b38	rs9271192	0.00033	-0.14	Cells - Cultured fibroblasts
AD	ENSG00000229391.7	HLA-DRB6	chr6_32610753_C_A_b38	rs9271192	6.3e-22	1.1	Cells - EBV-transformed lymphocytes
AD	ENSG00000232629.8	HLA-DQB2	chr6_32610753_C_A_b38	rs9271192	3.6e-19	1	Cells - EBV-transformed lymphocytes
AD	ENSG00000196301.3	HLA-DRB9	chr6_32610753_C_A_b38	rs9271192	4.9e-15	0.92	Cells - EBV-transformed lymphocytes
AD	ENSG00000237541.3	HLA-DQA2	chr6_32610753_C_A_b38	rs9271192	5e-14	0.9	Cells - EBV-transformed lymphocytes
AD	ENSG00000179344.16	HLA-DQB1	chr6_32610753_C_A_b38	rs9271192	2.1e-11	-0.74	Cells - EBV-transformed lymphocytes
AD	ENSG00000198502.5	HLA-DRB5	chr6_32610753_C_A_b38	rs9271192	8.7e-06	-0.53	Cells - EBV-transformed lymphocytes
AD	ENSG00000232629.8	HLA-DQB2	chr6_32610753_C_A_b38	rs9271192	1.2e-24	0.77	Colon - Sigmoid
AD	ENSG00000179344.16	HLA-DQB1	chr6_32610753_C_A_b38	rs9271192	2.8e-23	-0.68	Colon - Sigmoid
AD	ENSG00000229391.7	HLA-DRB6	chr6_32610753_C_A_b38	rs9271192	3.2e-21	0.74	Colon - Sigmoid
AD	ENSG00000198502.5	HLA-DRB5	chr6_32610753_C_A_b38	rs9271192	4.4e-21	-0.74	Colon - Sigmoid
AD	ENSG00000237541.3	HLA-DQA2	chr6_32610753_C_A_b38	rs9271192	1.6e-19	0.73	Colon - Sigmoid
AD	ENSG00000196735.11	HLA-DQA1	chr6_32610753_C_A_b38	rs9271192	5.8e-11	-0.39	Colon - Sigmoid
AD	ENSG00000204301.6	NOTCH4	chr6_32610753_C_A_b38	rs9271192	2.6e-05	-0.19	Colon - Sigmoid
AD	ENSG00000196126.11	HLA-DRB1	chr6_32610753_C_A_b38	rs9271192	4.9e-05	-0.22	Colon - Sigmoid
AD	ENSG00000231852.6	CYP21A2	chr6_32610753_C_A_b38	rs9271192	9.4e-05	0.23	Colon - Sigmoid
AD	ENSG00000229391.7	HLA-DRB6	chr6_32610753_C_A_b38	rs9271192	5.5e-30	0.73	Colon - Transverse
AD	ENSG00000232629.8	HLA-DQB2	chr6_32610753_C_A_b38	rs9271192	2.7e-29	0.73	Colon - Transverse
AD	ENSG00000237541.3	HLA-DQA2	chr6_32610753_C_A_b38	rs9271192	1.2e-28	0.77	Colon - Transverse
AD	ENSG00000198502.5	HLA-DRB5	chr6_32610753_C_A_b38	rs9271192	6.3e-27	-0.7	Colon - Transverse
AD	ENSG00000179344.16	HLA-DQB1	chr6_32610753_C_A_b38	rs9271192	3.5e-18	-0.5	Colon - Transverse
AD	ENSG00000196301.3	HLA-DRB9	chr6_32610753_C_A_b38	rs9271192	1.5e-12	0.5	Colon - Transverse
AD	ENSG00000196126.11	HLA-DRB1	chr6_32610753_C_A_b38	rs9271192	2.4e-08	-0.21	Colon - Transverse
AD	ENSG00000196735.11	HLA-DQA1	chr6_32610753_C_A_b38	rs9271192	1e-07	-0.23	Colon - Transverse
AD	ENSG00000232629.8	HLA-DQB2	chr6_32610753_C_A_b38	rs9271192	1.3e-24	0.81	Esophagus - Gastroesophageal Junction
AD	ENSG00000179344.16	HLA-DQB1	chr6_32610753_C_A_b38	rs9271192	6.2e-22	-0.7	Esophagus - Gastroesophageal Junction
AD	ENSG00000229391.7	HLA-DRB6	chr6_32610753_C_A_b38	rs9271192	1e-21	0.71	Esophagus - Gastroesophageal Junction
AD	ENSG00000198502.5	HLA-DRB5	chr6_32610753_C_A_b38	rs9271192	2.8e-20	-0.75	Esophagus - Gastroesophageal Junction
AD	ENSG00000237541.3	HLA-DQA2	chr6_32610753_C_A_b38	rs9271192	2.6e-19	0.76	Esophagus - Gastroesophageal Junction
AD	ENSG00000196126.11	HLA-DRB1	chr6_32610753_C_A_b38	rs9271192	2.7e-12	-0.35	Esophagus - Gastroesophageal Junction
AD	ENSG00000196735.11	HLA-DQA1	chr6_32610753_C_A_b38	rs9271192	3.2e-12	-0.5	Esophagus - Gastroesophageal Junction
AD	ENSG00000204301.6	NOTCH4	chr6_32610753_C_A_b38	rs9271192	2.2e-06	-0.2	Esophagus - Gastroesophageal Junction
AD	ENSG00000198502.5	HLA-DRB5	chr6_32610753_C_A_b38	rs9271192	2.3e-46	-0.76	Esophagus - Mucosa
AD	ENSG00000229391.7	HLA-DRB6	chr6_32610753_C_A_b38	rs9271192	1.2e-45	0.77	Esophagus - Mucosa
AD	ENSG00000237541.3	HLA-DQA2	chr6_32610753_C_A_b38	rs9271192	1.3e-31	0.69	Esophagus - Mucosa
AD	ENSG00000179344.16	HLA-DQB1	chr6_32610753_C_A_b38	rs9271192	3.5e-25	-0.56	Esophagus - Mucosa
AD	ENSG00000196126.11	HLA-DRB1	chr6_32610753_C_A_b38	rs9271192	1.3e-14	-0.26	Esophagus - Mucosa
AD	ENSG00000196735.11	HLA-DQA1	chr6_32610753_C_A_b38	rs9271192	8.8e-11	-0.27	Esophagus - Mucosa
AD	ENSG00000232629.8	HLA-DQB2	chr6_32610753_C_A_b38	rs9271192	6.3e-10	0.28	Esophagus - Mucosa
AD	ENSG00000244731.7	C4A	chr6_32610753_C_A_b38	rs9271192	3.1e-07	-0.26	Esophagus - Mucosa
AD	ENSG00000204301.6	NOTCH4	chr6_32610753_C_A_b38	rs9271192	5.8e-07	-0.2	Esophagus - Mucosa
AD	ENSG00000204314.10	PRRT1	chr6_32610753_C_A_b38	rs9271192	6.9e-06	0.14	Esophagus - Mucosa
AD	ENSG00000223534.1	HLA-DQB1-AS1	chr6_32610753_C_A_b38	rs9271192	3.2e-05	-0.2	Esophagus - Mucosa
AD	ENSG00000224557.7	HLA-DPB2	chr6_32610753_C_A_b38	rs9271192	0.00011	0.25	Esophagus - Mucosa
AD	ENSG00000232629.8	HLA-DQB2	chr6_32610753_C_A_b38	rs9271192	9.5e-42	0.88	Esophagus - Muscularis
AD	ENSG00000229391.7	HLA-DRB6	chr6_32610753_C_A_b38	rs9271192	4.4e-36	0.8	Esophagus - Muscularis
AD	ENSG00000237541.3	HLA-DQA2	chr6_32610753_C_A_b38	rs9271192	4.1e-30	0.79	Esophagus - Muscularis
AD	ENSG00000198502.5	HLA-DRB5	chr6_32610753_C_A_b38	rs9271192	1.2e-25	-0.72	Esophagus - Muscularis
AD	ENSG00000179344.16	HLA-DQB1	chr6_32610753_C_A_b38	rs9271192	7.4e-25	-0.65	Esophagus - Muscularis
AD	ENSG00000196735.11	HLA-DQA1	chr6_32610753_C_A_b38	rs9271192	1.2e-10	-0.38	Esophagus - Muscularis
AD	ENSG00000204301.6	NOTCH4	chr6_32610753_C_A_b38	rs9271192	2.8e-08	-0.22	Esophagus - Muscularis
AD	ENSG00000196126.11	HLA-DRB1	chr6_32610753_C_A_b38	rs9271192	1.2e-06	-0.21	Esophagus - Muscularis
AD	ENSG00000244731.7	C4A	chr6_32610753_C_A_b38	rs9271192	5.6e-06	-0.17	Esophagus - Muscularis
AD	ENSG00000223534.1	HLA-DQB1-AS1	chr6_32610753_C_A_b38	rs9271192	5e-05	-0.19	Esophagus - Muscularis
AD	ENSG00000198502.5	HLA-DRB5	chr6_32610753_C_A_b38	rs9271192	7.6e-40	-0.92	Heart - Atrial Appendage
AD	ENSG00000196126.11	HLA-DRB1	chr6_32610753_C_A_b38	rs9271192	6.4e-36	-0.67	Heart - Atrial Appendage
AD	ENSG00000179344.16	HLA-DQB1	chr6_32610753_C_A_b38	rs9271192	5.4e-25	-0.73	Heart - Atrial Appendage
AD	ENSG00000229391.7	HLA-DRB6	chr6_32610753_C_A_b38	rs9271192	5.4e-24	0.71	Heart - Atrial Appendage
AD	ENSG00000232629.8	HLA-DQB2	chr6_32610753_C_A_b38	rs9271192	1.7e-22	0.68	Heart - Atrial Appendage
AD	ENSG00000237541.3	HLA-DQA2	chr6_32610753_C_A_b38	rs9271192	1.2e-19	0.67	Heart - Atrial Appendage
AD	ENSG00000196735.11	HLA-DQA1	chr6_32610753_C_A_b38	rs9271192	1.9e-11	-0.41	Heart - Atrial Appendage
AD	ENSG00000223534.1	HLA-DQB1-AS1	chr6_32610753_C_A_b38	rs9271192	3.3e-09	-0.33	Heart - Atrial Appendage
AD	ENSG00000244731.7	C4A	chr6_32610753_C_A_b38	rs9271192	3.7e-07	-0.24	Heart - Atrial Appendage
AD	ENSG00000204301.6	NOTCH4	chr6_32610753_C_A_b38	rs9271192	9e-05	-0.14	Heart - Atrial Appendage
AD	ENSG00000198502.5	HLA-DRB5	chr6_32610753_C_A_b38	rs9271192	1.4e-42	-0.9	Heart - Left Ventricle
AD	ENSG00000229391.7	HLA-DRB6	chr6_32610753_C_A_b38	rs9271192	5.4e-35	0.78	Heart - Left Ventricle
AD	ENSG00000179344.16	HLA-DQB1	chr6_32610753_C_A_b38	rs9271192	1.4e-28	-0.68	Heart - Left Ventricle
AD	ENSG00000232629.8	HLA-DQB2	chr6_32610753_C_A_b38	rs9271192	5.8e-28	0.75	Heart - Left Ventricle
AD	ENSG00000237541.3	HLA-DQA2	chr6_32610753_C_A_b38	rs9271192	1.5e-25	0.76	Heart - Left Ventricle
AD	ENSG00000196126.11	HLA-DRB1	chr6_32610753_C_A_b38	rs9271192	7.9e-22	-0.38	Heart - Left Ventricle
AD	ENSG00000196735.11	HLA-DQA1	chr6_32610753_C_A_b38	rs9271192	5.6e-12	-0.39	Heart - Left Ventricle
AD	ENSG00000204301.6	NOTCH4	chr6_32610753_C_A_b38	rs9271192	3.7e-08	-0.16	Heart - Left Ventricle
AD	ENSG00000244731.7	C4A	chr6_32610753_C_A_b38	rs9271192	1.2e-06	-0.22	Heart - Left Ventricle
AD	ENSG00000223534.1	HLA-DQB1-AS1	chr6_32610753_C_A_b38	rs9271192	2.3e-06	-0.25	Heart - Left Ventricle
AD	ENSG00000204310.12	AGPAT1	chr6_32610753_C_A_b38	rs9271192	3.5e-05	0.12	Heart - Left Ventricle
AD	ENSG00000198502.5	HLA-DRB5	chr6_32610753_C_A_b38	rs9271192	5.2e-08	-1.1	Kidney - Cortex
AD	ENSG00000232629.8	HLA-DQB2	chr6_32610753_C_A_b38	rs9271192	2.4e-16	0.82	Liver
AD	ENSG00000229391.7	HLA-DRB6	chr6_32610753_C_A_b38	rs9271192	1.7e-15	0.81	Liver
AD	ENSG00000198502.5	HLA-DRB5	chr6_32610753_C_A_b38	rs9271192	2e-14	-0.72	Liver
AD	ENSG00000179344.16	HLA-DQB1	chr6_32610753_C_A_b38	rs9271192	9.4e-12	-0.56	Liver
AD	ENSG00000237541.3	HLA-DQA2	chr6_32610753_C_A_b38	rs9271192	4e-10	0.68	Liver
AD	ENSG00000204310.12	AGPAT1	chr6_32610753_C_A_b38	rs9271192	1.2e-08	0.41	Liver
AD	ENSG00000196126.11	HLA-DRB1	chr6_32610753_C_A_b38	rs9271192	2e-06	-0.29	Liver
AD	ENSG00000196735.11	HLA-DQA1	chr6_32610753_C_A_b38	rs9271192	5.6e-06	-0.31	Liver
AD	ENSG00000223534.1	HLA-DQB1-AS1	chr6_32610753_C_A_b38	rs9271192	7.3e-06	-0.43	Liver
AD	ENSG00000198502.5	HLA-DRB5	chr6_32610753_C_A_b38	rs9271192	6.8e-51	-0.82	Lung
AD	ENSG00000229391.7	HLA-DRB6	chr6_32610753_C_A_b38	rs9271192	4e-50	0.85	Lung
AD	ENSG00000196301.3	HLA-DRB9	chr6_32610753_C_A_b38	rs9271192	3.2e-43	0.77	Lung
AD	ENSG00000232629.8	HLA-DQB2	chr6_32610753_C_A_b38	rs9271192	1.6e-38	0.72	Lung
AD	ENSG00000237541.3	HLA-DQA2	chr6_32610753_C_A_b38	rs9271192	2e-34	0.79	Lung
AD	ENSG00000179344.16	HLA-DQB1	chr6_32610753_C_A_b38	rs9271192	5.5e-28	-0.52	Lung
AD	ENSG00000196126.11	HLA-DRB1	chr6_32610753_C_A_b38	rs9271192	5e-27	-0.36	Lung
AD	ENSG00000196735.11	HLA-DQA1	chr6_32610753_C_A_b38	rs9271192	2.5e-25	-0.45	Lung
AD	ENSG00000223534.1	HLA-DQB1-AS1	chr6_32610753_C_A_b38	rs9271192	1.7e-11	-0.29	Lung
AD	ENSG00000204301.6	NOTCH4	chr6_32610753_C_A_b38	rs9271192	3.6e-09	-0.2	Lung
AD	ENSG00000244731.7	C4A	chr6_32610753_C_A_b38	rs9271192	6.6e-05	-0.18	Lung
AD	ENSG00000198502.5	HLA-DRB5	chr6_32610753_C_A_b38	rs9271192	1.6e-14	-0.86	Minor Salivary Gland
AD	ENSG00000232629.8	HLA-DQB2	chr6_32610753_C_A_b38	rs9271192	3.1e-09	0.74	Minor Salivary Gland
AD	ENSG00000237541.3	HLA-DQA2	chr6_32610753_C_A_b38	rs9271192	3.5e-09	0.79	Minor Salivary Gland
AD	ENSG00000179344.16	HLA-DQB1	chr6_32610753_C_A_b38	rs9271192	4.9e-08	-0.67	Minor Salivary Gland
AD	ENSG00000196126.11	HLA-DRB1	chr6_32610753_C_A_b38	rs9271192	9.8e-08	-0.53	Minor Salivary Gland
AD	ENSG00000229391.7	HLA-DRB6	chr6_32610753_C_A_b38	rs9271192	1.3e-07	0.65	Minor Salivary Gland
AD	ENSG00000198502.5	HLA-DRB5	chr6_32610753_C_A_b38	rs9271192	3.2e-67	-0.84	Muscle - Skeletal
AD	ENSG00000179344.16	HLA-DQB1	chr6_32610753_C_A_b38	rs9271192	2.6e-55	-0.74	Muscle - Skeletal
AD	ENSG00000229391.7	HLA-DRB6	chr6_32610753_C_A_b38	rs9271192	1.8e-44	0.74	Muscle - Skeletal
AD	ENSG00000232629.8	HLA-DQB2	chr6_32610753_C_A_b38	rs9271192	2.6e-43	0.74	Muscle - Skeletal
AD	ENSG00000237541.3	HLA-DQA2	chr6_32610753_C_A_b38	rs9271192	2.2e-39	0.75	Muscle - Skeletal
AD	ENSG00000196126.11	HLA-DRB1	chr6_32610753_C_A_b38	rs9271192	2e-33	-0.4	Muscle - Skeletal
AD	ENSG00000196735.11	HLA-DQA1	chr6_32610753_C_A_b38	rs9271192	1.6e-14	-0.33	Muscle - Skeletal
AD	ENSG00000223534.1	HLA-DQB1-AS1	chr6_32610753_C_A_b38	rs9271192	5e-13	-0.38	Muscle - Skeletal
AD	ENSG00000204301.6	NOTCH4	chr6_32610753_C_A_b38	rs9271192	7.3e-10	-0.21	Muscle - Skeletal
AD	ENSG00000244731.7	C4A	chr6_32610753_C_A_b38	rs9271192	4e-05	-0.18	Muscle - Skeletal
AD	ENSG00000204305.13	AGER	chr6_32610753_C_A_b38	rs9271192	0.00017	0.15	Muscle - Skeletal
AD	ENSG00000204371.11	EHMT2	chr6_32610753_C_A_b38	rs9271192	0.00022	0.086	Muscle - Skeletal
AD	ENSG00000229391.7	HLA-DRB6	chr6_32610753_C_A_b38	rs9271192	1.8e-48	0.81	Nerve - Tibial
AD	ENSG00000198502.5	HLA-DRB5	chr6_32610753_C_A_b38	rs9271192	3.7e-44	-0.79	Nerve - Tibial
AD	ENSG00000232629.8	HLA-DQB2	chr6_32610753_C_A_b38	rs9271192	2.7e-41	0.8	Nerve - Tibial
AD	ENSG00000179344.16	HLA-DQB1	chr6_32610753_C_A_b38	rs9271192	9.3e-35	-0.64	Nerve - Tibial
AD	ENSG00000237541.3	HLA-DQA2	chr6_32610753_C_A_b38	rs9271192	5.8e-33	0.77	Nerve - Tibial
AD	ENSG00000196301.3	HLA-DRB9	chr6_32610753_C_A_b38	rs9271192	4.6e-22	0.56	Nerve - Tibial
AD	ENSG00000196735.11	HLA-DQA1	chr6_32610753_C_A_b38	rs9271192	4.4e-13	-0.31	Nerve - Tibial
AD	ENSG00000196126.11	HLA-DRB1	chr6_32610753_C_A_b38	rs9271192	6.1e-13	-0.23	Nerve - Tibial
AD	ENSG00000244731.7	C4A	chr6_32610753_C_A_b38	rs9271192	1.1e-07	-0.26	Nerve - Tibial
AD	ENSG00000223534.1	HLA-DQB1-AS1	chr6_32610753_C_A_b38	rs9271192	1.4e-07	-0.24	Nerve - Tibial
AD	ENSG00000204310.12	AGPAT1	chr6_32610753_C_A_b38	rs9271192	1.6e-05	0.092	Nerve - Tibial
AD	ENSG00000231852.6	CYP21A2	chr6_32610753_C_A_b38	rs9271192	2e-05	0.24	Nerve - Tibial
AD	ENSG00000204305.13	AGER	chr6_32610753_C_A_b38	rs9271192	2.2e-05	0.17	Nerve - Tibial
AD	ENSG00000204344.14	STK19	chr6_32610753_C_A_b38	rs9271192	0.00027	-0.14	Nerve - Tibial
AD	ENSG00000198502.5	HLA-DRB5	chr6_32610753_C_A_b38	rs9271192	9e-16	-0.74	Ovary
AD	ENSG00000229391.7	HLA-DRB6	chr6_32610753_C_A_b38	rs9271192	2.1e-15	0.71	Ovary
AD	ENSG00000232629.8	HLA-DQB2	chr6_32610753_C_A_b38	rs9271192	6.9e-14	0.74	Ovary
AD	ENSG00000237541.3	HLA-DQA2	chr6_32610753_C_A_b38	rs9271192	4.6e-12	0.75	Ovary
AD	ENSG00000179344.16	HLA-DQB1	chr6_32610753_C_A_b38	rs9271192	5.6e-09	-0.43	Ovary
AD	ENSG00000198502.5	HLA-DRB5	chr6_32610753_C_A_b38	rs9271192	5.5e-25	-0.76	Pancreas
AD	ENSG00000232629.8	HLA-DQB2	chr6_32610753_C_A_b38	rs9271192	6.9e-24	0.76	Pancreas
AD	ENSG00000229391.7	HLA-DRB6	chr6_32610753_C_A_b38	rs9271192	1.1e-22	0.71	Pancreas
AD	ENSG00000237541.3	HLA-DQA2	chr6_32610753_C_A_b38	rs9271192	4e-17	0.69	Pancreas
AD	ENSG00000179344.16	HLA-DQB1	chr6_32610753_C_A_b38	rs9271192	3.1e-12	-0.56	Pancreas
AD	ENSG00000196126.11	HLA-DRB1	chr6_32610753_C_A_b38	rs9271192	1.7e-09	-0.29	Pancreas
AD	ENSG00000196735.11	HLA-DQA1	chr6_32610753_C_A_b38	rs9271192	3.5e-07	-0.33	Pancreas
AD	ENSG00000198502.5	HLA-DRB5	chr6_32610753_C_A_b38	rs9271192	4.9e-20	-0.8	Pituitary
AD	ENSG00000229391.7	HLA-DRB6	chr6_32610753_C_A_b38	rs9271192	5.2e-18	0.69	Pituitary
AD	ENSG00000179344.16	HLA-DQB1	chr6_32610753_C_A_b38	rs9271192	1.1e-17	-0.76	Pituitary
AD	ENSG00000232629.8	HLA-DQB2	chr6_32610753_C_A_b38	rs9271192	7.5e-17	0.78	Pituitary
AD	ENSG00000196126.11	HLA-DRB1	chr6_32610753_C_A_b38	rs9271192	2.5e-16	-0.43	Pituitary
AD	ENSG00000237541.3	HLA-DQA2	chr6_32610753_C_A_b38	rs9271192	7e-16	0.76	Pituitary
AD	ENSG00000196735.11	HLA-DQA1	chr6_32610753_C_A_b38	rs9271192	5.9e-09	-0.38	Pituitary
AD	ENSG00000223534.1	HLA-DQB1-AS1	chr6_32610753_C_A_b38	rs9271192	2.5e-08	-0.47	Pituitary
AD	ENSG00000198502.5	HLA-DRB5	chr6_32610753_C_A_b38	rs9271192	2.1e-19	-0.74	Prostate
AD	ENSG00000179344.16	HLA-DQB1	chr6_32610753_C_A_b38	rs9271192	1.8e-18	-0.66	Prostate
AD	ENSG00000229391.7	HLA-DRB6	chr6_32610753_C_A_b38	rs9271192	1.4e-17	0.76	Prostate
AD	ENSG00000237541.3	HLA-DQA2	chr6_32610753_C_A_b38	rs9271192	4.7e-15	0.75	Prostate
AD	ENSG00000232629.8	HLA-DQB2	chr6_32610753_C_A_b38	rs9271192	5.8e-15	0.71	Prostate
AD	ENSG00000196126.11	HLA-DRB1	chr6_32610753_C_A_b38	rs9271192	4.3e-11	-0.37	Prostate
AD	ENSG00000196735.11	HLA-DQA1	chr6_32610753_C_A_b38	rs9271192	1.9e-10	-0.42	Prostate
AD	ENSG00000223534.1	HLA-DQB1-AS1	chr6_32610753_C_A_b38	rs9271192	2.9e-08	-0.38	Prostate
AD	ENSG00000196301.3	HLA-DRB9	chr6_32610753_C_A_b38	rs9271192	6.3e-06	0.46	Prostate
AD	ENSG00000179344.16	HLA-DQB1	chr6_32610753_C_A_b38	rs9271192	3.8e-44	-0.73	Skin - Not Sun Exposed (Suprapubic)
AD	ENSG00000198502.5	HLA-DRB5	chr6_32610753_C_A_b38	rs9271192	4.1e-44	-0.78	Skin - Not Sun Exposed (Suprapubic)
AD	ENSG00000229391.7	HLA-DRB6	chr6_32610753_C_A_b38	rs9271192	1.8e-35	0.76	Skin - Not Sun Exposed (Suprapubic)
AD	ENSG00000196126.11	HLA-DRB1	chr6_32610753_C_A_b38	rs9271192	2.3e-27	-0.39	Skin - Not Sun Exposed (Suprapubic)
AD	ENSG00000237541.3	HLA-DQA2	chr6_32610753_C_A_b38	rs9271192	7.5e-22	0.51	Skin - Not Sun Exposed (Suprapubic)
AD	ENSG00000196735.11	HLA-DQA1	chr6_32610753_C_A_b38	rs9271192	8e-13	-0.33	Skin - Not Sun Exposed (Suprapubic)
AD	ENSG00000223534.1	HLA-DQB1-AS1	chr6_32610753_C_A_b38	rs9271192	2.4e-10	-0.29	Skin - Not Sun Exposed (Suprapubic)
AD	ENSG00000204301.6	NOTCH4	chr6_32610753_C_A_b38	rs9271192	1.1e-09	-0.19	Skin - Not Sun Exposed (Suprapubic)
AD	ENSG00000244731.7	C4A	chr6_32610753_C_A_b38	rs9271192	5.7e-08	-0.34	Skin - Not Sun Exposed (Suprapubic)
AD	ENSG00000204314.10	PRRT1	chr6_32610753_C_A_b38	rs9271192	3.7e-06	0.19	Skin - Not Sun Exposed (Suprapubic)
AD	ENSG00000196301.3	HLA-DRB9	chr6_32610753_C_A_b38	rs9271192	9.2e-05	0.26	Skin - Not Sun Exposed (Suprapubic)
AD	ENSG00000231852.6	CYP21A2	chr6_32610753_C_A_b38	rs9271192	0.00016	0.25	Skin - Not Sun Exposed (Suprapubic)
AD	ENSG00000179344.16	HLA-DQB1	chr6_32610753_C_A_b38	rs9271192	6.2e-53	-0.85	Skin - Sun Exposed (Lower leg)
AD	ENSG00000198502.5	HLA-DRB5	chr6_32610753_C_A_b38	rs9271192	2.3e-48	-0.84	Skin - Sun Exposed (Lower leg)
AD	ENSG00000229391.7	HLA-DRB6	chr6_32610753_C_A_b38	rs9271192	7.8e-48	0.83	Skin - Sun Exposed (Lower leg)
AD	ENSG00000196126.11	HLA-DRB1	chr6_32610753_C_A_b38	rs9271192	1e-40	-0.46	Skin - Sun Exposed (Lower leg)
AD	ENSG00000237541.3	HLA-DQA2	chr6_32610753_C_A_b38	rs9271192	4.6e-40	0.73	Skin - Sun Exposed (Lower leg)
AD	ENSG00000196735.11	HLA-DQA1	chr6_32610753_C_A_b38	rs9271192	3.1e-11	-0.32	Skin - Sun Exposed (Lower leg)
AD	ENSG00000223534.1	HLA-DQB1-AS1	chr6_32610753_C_A_b38	rs9271192	3.5e-11	-0.34	Skin - Sun Exposed (Lower leg)
AD	ENSG00000204301.6	NOTCH4	chr6_32610753_C_A_b38	rs9271192	4.4e-08	-0.15	Skin - Sun Exposed (Lower leg)
AD	ENSG00000204305.13	AGER	chr6_32610753_C_A_b38	rs9271192	9.1e-08	0.19	Skin - Sun Exposed (Lower leg)
AD	ENSG00000204314.10	PRRT1	chr6_32610753_C_A_b38	rs9271192	3.3e-07	0.21	Skin - Sun Exposed (Lower leg)
AD	ENSG00000244731.7	C4A	chr6_32610753_C_A_b38	rs9271192	2.4e-06	-0.26	Skin - Sun Exposed (Lower leg)
AD	ENSG00000196301.3	HLA-DRB9	chr6_32610753_C_A_b38	rs9271192	4.2e-05	0.26	Skin - Sun Exposed (Lower leg)
AD	ENSG00000204304.11	PBX2	chr6_32610753_C_A_b38	rs9271192	5e-05	0.13	Skin - Sun Exposed (Lower leg)
AD	ENSG00000232629.8	HLA-DQB2	chr6_32610753_C_A_b38	rs9271192	4.7e-14	0.58	Small Intestine - Terminal Ileum
AD	ENSG00000196301.3	HLA-DRB9	chr6_32610753_C_A_b38	rs9271192	2.9e-13	0.69	Small Intestine - Terminal Ileum
AD	ENSG00000179344.16	HLA-DQB1	chr6_32610753_C_A_b38	rs9271192	6.5e-13	-0.51	Small Intestine - Terminal Ileum
AD	ENSG00000229391.7	HLA-DRB6	chr6_32610753_C_A_b38	rs9271192	6.7e-13	0.65	Small Intestine - Terminal Ileum
AD	ENSG00000237541.3	HLA-DQA2	chr6_32610753_C_A_b38	rs9271192	1e-12	0.71	Small Intestine - Terminal Ileum
AD	ENSG00000198502.5	HLA-DRB5	chr6_32610753_C_A_b38	rs9271192	1e-11	-0.62	Small Intestine - Terminal Ileum
AD	ENSG00000196735.11	HLA-DQA1	chr6_32610753_C_A_b38	rs9271192	1.1e-05	-0.21	Small Intestine - Terminal Ileum
AD	ENSG00000232629.8	HLA-DQB2	chr6_32610753_C_A_b38	rs9271192	4.5e-20	0.81	Spleen
AD	ENSG00000229391.7	HLA-DRB6	chr6_32610753_C_A_b38	rs9271192	4.8e-19	0.84	Spleen
AD	ENSG00000179344.16	HLA-DQB1	chr6_32610753_C_A_b38	rs9271192	1.9e-18	-0.71	Spleen
AD	ENSG00000237541.3	HLA-DQA2	chr6_32610753_C_A_b38	rs9271192	6.7e-14	0.73	Spleen
AD	ENSG00000198502.5	HLA-DRB5	chr6_32610753_C_A_b38	rs9271192	3e-13	-0.62	Spleen
AD	ENSG00000196301.3	HLA-DRB9	chr6_32610753_C_A_b38	rs9271192	2.7e-10	0.59	Spleen
AD	ENSG00000204267.13	TAP2	chr6_32610753_C_A_b38	rs9271192	4.5e-05	-0.3	Spleen
AD	ENSG00000229391.7	HLA-DRB6	chr6_32610753_C_A_b38	rs9271192	1.4e-27	0.64	Stomach
AD	ENSG00000198502.5	HLA-DRB5	chr6_32610753_C_A_b38	rs9271192	8.3e-27	-0.72	Stomach
AD	ENSG00000232629.8	HLA-DQB2	chr6_32610753_C_A_b38	rs9271192	4.3e-25	0.72	Stomach
AD	ENSG00000179344.16	HLA-DQB1	chr6_32610753_C_A_b38	rs9271192	2.7e-22	-0.69	Stomach
AD	ENSG00000237541.3	HLA-DQA2	chr6_32610753_C_A_b38	rs9271192	3.2e-19	0.68	Stomach
AD	ENSG00000196735.11	HLA-DQA1	chr6_32610753_C_A_b38	rs9271192	2.8e-15	-0.41	Stomach
AD	ENSG00000196126.11	HLA-DRB1	chr6_32610753_C_A_b38	rs9271192	1.4e-06	-0.24	Stomach
AD	ENSG00000223534.1	HLA-DQB1-AS1	chr6_32610753_C_A_b38	rs9271192	1.1e-05	-0.32	Stomach
AD	ENSG00000179344.16	HLA-DQB1	chr6_32610753_C_A_b38	rs9271192	2e-45	-1	Testis
AD	ENSG00000229391.7	HLA-DRB6	chr6_32610753_C_A_b38	rs9271192	5.3e-29	0.76	Testis
AD	ENSG00000198502.5	HLA-DRB5	chr6_32610753_C_A_b38	rs9271192	1e-20	-0.79	Testis
AD	ENSG00000232629.8	HLA-DQB2	chr6_32610753_C_A_b38	rs9271192	1.9e-19	0.76	Testis
AD	ENSG00000196126.11	HLA-DRB1	chr6_32610753_C_A_b38	rs9271192	6.2e-16	-0.54	Testis
AD	ENSG00000237541.3	HLA-DQA2	chr6_32610753_C_A_b38	rs9271192	3.5e-12	0.61	Testis
AD	ENSG00000277427.1	XXbac-BPG154L12.5	chr6_32610753_C_A_b38	rs9271192	2.7e-10	0.48	Testis
AD	ENSG00000196735.11	HLA-DQA1	chr6_32610753_C_A_b38	rs9271192	4.1e-08	-0.35	Testis
AD	ENSG00000223534.1	HLA-DQB1-AS1	chr6_32610753_C_A_b38	rs9271192	4.6e-06	-0.34	Testis
AD	ENSG00000168394.10	TAP1	chr6_32610753_C_A_b38	rs9271192	5.1e-06	-0.21	Testis
AD	ENSG00000198502.5	HLA-DRB5	chr6_32610753_C_A_b38	rs9271192	3.2e-64	-0.92	Thyroid
AD	ENSG00000232629.8	HLA-DQB2	chr6_32610753_C_A_b38	rs9271192	5.1e-45	0.74	Thyroid
AD	ENSG00000229391.7	HLA-DRB6	chr6_32610753_C_A_b38	rs9271192	3.6e-44	0.76	Thyroid
AD	ENSG00000237541.3	HLA-DQA2	chr6_32610753_C_A_b38	rs9271192	8.8e-37	0.75	Thyroid
AD	ENSG00000179344.16	HLA-DQB1	chr6_32610753_C_A_b38	rs9271192	1.1e-34	-0.63	Thyroid
AD	ENSG00000196126.11	HLA-DRB1	chr6_32610753_C_A_b38	rs9271192	2e-30	-0.41	Thyroid
AD	ENSG00000196301.3	HLA-DRB9	chr6_32610753_C_A_b38	rs9271192	2.3e-26	0.62	Thyroid
AD	ENSG00000196735.11	HLA-DQA1	chr6_32610753_C_A_b38	rs9271192	3e-13	-0.3	Thyroid
AD	ENSG00000223534.1	HLA-DQB1-AS1	chr6_32610753_C_A_b38	rs9271192	1e-09	-0.27	Thyroid
AD	ENSG00000225914.1	XXbac-BPG154L12.4	chr6_32610753_C_A_b38	rs9271192	7.5e-08	0.33	Thyroid
AD	ENSG00000231852.6	CYP21A2	chr6_32610753_C_A_b38	rs9271192	1.2e-05	0.19	Thyroid
AD	ENSG00000244731.7	C4A	chr6_32610753_C_A_b38	rs9271192	2.9e-05	-0.19	Thyroid
AD	ENSG00000224557.7	HLA-DPB2	chr6_32610753_C_A_b38	rs9271192	0.00013	0.21	Thyroid
AD	ENSG00000204314.10	PRRT1	chr6_32610753_C_A_b38	rs9271192	0.00017	0.12	Thyroid
AD	ENSG00000204308.7	RNF5	chr6_32610753_C_A_b38	rs9271192	0.00019	-0.11	Thyroid
AD	ENSG00000232629.8	HLA-DQB2	chr6_32610753_C_A_b38	rs9271192	4.5e-12	0.84	Uterus
AD	ENSG00000198502.5	HLA-DRB5	chr6_32610753_C_A_b38	rs9271192	1.5e-11	-0.81	Uterus
AD	ENSG00000179344.16	HLA-DQB1	chr6_32610753_C_A_b38	rs9271192	3.7e-11	-0.82	Uterus
AD	ENSG00000237541.3	HLA-DQA2	chr6_32610753_C_A_b38	rs9271192	5.6e-11	0.89	Uterus
AD	ENSG00000229391.7	HLA-DRB6	chr6_32610753_C_A_b38	rs9271192	8.4e-11	0.77	Uterus
AD	ENSG00000198502.5	HLA-DRB5	chr6_32610753_C_A_b38	rs9271192	1.4e-19	-0.93	Vagina
AD	ENSG00000179344.16	HLA-DQB1	chr6_32610753_C_A_b38	rs9271192	2e-10	-0.7	Vagina
AD	ENSG00000229391.7	HLA-DRB6	chr6_32610753_C_A_b38	rs9271192	8.4e-09	0.63	Vagina
AD	ENSG00000237541.3	HLA-DQA2	chr6_32610753_C_A_b38	rs9271192	3e-06	0.56	Vagina
AD	ENSG00000232629.8	HLA-DQB2	chr6_32610753_C_A_b38	rs9271192	6.3e-57	0.75	Whole Blood
AD	ENSG00000179344.16	HLA-DQB1	chr6_32610753_C_A_b38	rs9271192	3.7e-50	-0.56	Whole Blood
AD	ENSG00000237541.3	HLA-DQA2	chr6_32610753_C_A_b38	rs9271192	1.6e-49	0.8	Whole Blood
AD	ENSG00000198502.5	HLA-DRB5	chr6_32610753_C_A_b38	rs9271192	4.9e-47	-0.54	Whole Blood
AD	ENSG00000229391.7	HLA-DRB6	chr6_32610753_C_A_b38	rs9271192	3.3e-46	0.66	Whole Blood
AD	ENSG00000196301.3	HLA-DRB9	chr6_32610753_C_A_b38	rs9271192	5.6e-38	0.6	Whole Blood
AD	ENSG00000196735.11	HLA-DQA1	chr6_32610753_C_A_b38	rs9271192	2.6e-18	-0.22	Whole Blood
AD	ENSG00000223534.1	HLA-DQB1-AS1	chr6_32610753_C_A_b38	rs9271192	4.6e-13	-0.25	Whole Blood
AD	ENSG00000196126.11	HLA-DRB1	chr6_32610753_C_A_b38	rs9271192	7.1e-08	-0.11	Whole Blood
AD	ENSG00000270761.1	RP11-385F7.1	chr6_47485642_G_C_b38	rs9349407	1.5e-05	-0.24	Adipose - Subcutaneous
AD	ENSG00000270761.1	RP11-385F7.1	chr6_47485642_G_C_b38	rs9349407	1.4e-05	-0.33	Artery - Aorta
AD	ENSG00000164393.8	ADGRF2	chr6_47485642_G_C_b38	rs9349407	2.3e-06	0.26	Artery - Tibial
AD	ENSG00000153294.11	ADGRF4	chr6_47485642_G_C_b38	rs9349407	1.5e-05	0.26	Artery - Tibial
AD	ENSG00000270761.1	RP11-385F7.1	chr6_47485642_G_C_b38	rs9349407	2.7e-05	-0.46	Brain - Caudate (basal ganglia)
AD	ENSG00000270761.1	RP11-385F7.1	chr6_47485642_G_C_b38	rs9349407	3.4e-20	-0.9	Brain - Cerebellar Hemisphere
AD	ENSG00000270761.1	RP11-385F7.1	chr6_47485642_G_C_b38	rs9349407	1.2e-19	-0.85	Brain - Cerebellum
AD	ENSG00000270761.1	RP11-385F7.1	chr6_47485642_G_C_b38	rs9349407	2.3e-05	-0.47	Brain - Cortex
AD	ENSG00000270761.1	RP11-385F7.1	chr6_47485642_G_C_b38	rs9349407	1.9e-05	-0.42	Brain - Nucleus accumbens (basal ganglia)
AD	ENSG00000270761.1	RP11-385F7.1	chr6_47485642_G_C_b38	rs9349407	7.4e-07	-0.6	Brain - Putamen (basal ganglia)
AD	ENSG00000198087.7	CD2AP	chr6_47485642_G_C_b38	rs9349407	1.5e-07	0.13	Cells - Cultured fibroblasts
AD	ENSG00000270761.1	RP11-385F7.1	chr6_47485642_G_C_b38	rs9349407	6.5e-05	-0.26	Cells - Cultured fibroblasts
AD	ENSG00000270761.1	RP11-385F7.1	chr6_47485642_G_C_b38	rs9349407	1e-05	-0.49	Cells - EBV-transformed lymphocytes
AD	ENSG00000270761.1	RP11-385F7.1	chr6_47485642_G_C_b38	rs9349407	7.6e-07	-0.37	Colon - Sigmoid
AD	ENSG00000270761.1	RP11-385F7.1	chr6_47485642_G_C_b38	rs9349407	2.5e-14	-0.3	Colon - Transverse
AD	ENSG00000198087.7	CD2AP	chr6_47485642_G_C_b38	rs9349407	3.5e-06	0.098	Colon - Transverse
AD	ENSG00000270761.1	RP11-385F7.1	chr6_47485642_G_C_b38	rs9349407	7.3e-08	-0.42	Esophagus - Gastroesophageal Junction
AD	ENSG00000198087.7	CD2AP	chr6_47485642_G_C_b38	rs9349407	5.8e-21	0.2	Esophagus - Mucosa
AD	ENSG00000164393.8	ADGRF2	chr6_47485642_G_C_b38	rs9349407	3.8e-13	0.3	Esophagus - Mucosa
AD	ENSG00000270761.1	RP11-385F7.1	chr6_47485642_G_C_b38	rs9349407	8.4e-10	-0.37	Esophagus - Mucosa
AD	ENSG00000270761.1	RP11-385F7.1	chr6_47485642_G_C_b38	rs9349407	9.2e-09	-0.39	Esophagus - Muscularis
AD	ENSG00000270761.1	RP11-385F7.1	chr6_47485642_G_C_b38	rs9349407	2.5e-05	-0.32	Heart - Atrial Appendage
AD	ENSG00000270761.1	RP11-385F7.1	chr6_47485642_G_C_b38	rs9349407	8e-06	-0.71	Kidney - Cortex
AD	ENSG00000270761.1	RP11-385F7.1	chr6_47485642_G_C_b38	rs9349407	7.2e-13	-0.34	Lung
AD	ENSG00000270761.1	RP11-385F7.1	chr6_47485642_G_C_b38	rs9349407	8.2e-05	-0.21	Muscle - Skeletal
AD	ENSG00000270761.1	RP11-385F7.1	chr6_47485642_G_C_b38	rs9349407	9.1e-12	-0.44	Nerve - Tibial
AD	ENSG00000270761.1	RP11-385F7.1	chr6_47485642_G_C_b38	rs9349407	5.1e-13	-0.57	Pancreas
AD	ENSG00000198087.7	CD2AP	chr6_47485642_G_C_b38	rs9349407	1.3e-05	0.17	Pancreas
AD	ENSG00000198087.7	CD2AP	chr6_47485642_G_C_b38	rs9349407	3.1e-15	0.49	Pituitary
AD	ENSG00000270761.1	RP11-385F7.1	chr6_47485642_G_C_b38	rs9349407	3.2e-15	-0.6	Pituitary
AD	ENSG00000270761.1	RP11-385F7.1	chr6_47485642_G_C_b38	rs9349407	4.8e-15	-0.48	Prostate
AD	ENSG00000164393.8	ADGRF2	chr6_47485642_G_C_b38	rs9349407	8.5e-08	0.15	Skin - Not Sun Exposed (Suprapubic)
AD	ENSG00000270761.1	RP11-385F7.1	chr6_47485642_G_C_b38	rs9349407	2.4e-05	-0.25	Skin - Not Sun Exposed (Suprapubic)
AD	ENSG00000270761.1	RP11-385F7.1	chr6_47485642_G_C_b38	rs9349407	4.2e-10	-0.36	Skin - Sun Exposed (Lower leg)
AD	ENSG00000270761.1	RP11-385F7.1	chr6_47485642_G_C_b38	rs9349407	3.9e-05	-0.32	Small Intestine - Terminal Ileum
AD	ENSG00000270761.1	RP11-385F7.1	chr6_47485642_G_C_b38	rs9349407	5e-07	-0.51	Spleen
AD	ENSG00000270761.1	RP11-385F7.1	chr6_47485642_G_C_b38	rs9349407	3.8e-11	-0.36	Stomach
AD	ENSG00000270761.1	RP11-385F7.1	chr6_47485642_G_C_b38	rs9349407	3.2e-26	-0.54	Thyroid
AD	ENSG00000270761.1	RP11-385F7.1	chr6_47464901_C_T_b38	rs9381563	1.3e-14	0.74	Brain - Cerebellar Hemisphere
AD	ENSG00000270761.1	RP11-385F7.1	chr6_47464901_C_T_b38	rs9381563	5.2e-16	0.65	Brain - Cerebellum
AD	ENSG00000198087.7	CD2AP	chr6_47464901_C_T_b38	rs9381563	1.4e-06	-0.34	Brain - Spinal cord (cervical c-1)
AD	ENSG00000198087.7	CD2AP	chr6_47464901_C_T_b38	rs9381563	3.7e-08	-0.12	Cells - Cultured fibroblasts
AD	ENSG00000270761.1	RP11-385F7.1	chr6_47464901_C_T_b38	rs9381563	7.7e-07	0.18	Colon - Transverse
AD	ENSG00000198087.7	CD2AP	chr6_47464901_C_T_b38	rs9381563	3.4e-05	-0.078	Colon - Transverse
AD	ENSG00000198087.7	CD2AP	chr6_47464901_C_T_b38	rs9381563	2.3e-14	-0.15	Esophagus - Mucosa
AD	ENSG00000164393.8	ADGRF2	chr6_47464901_C_T_b38	rs9381563	2.9e-09	-0.22	Esophagus - Mucosa
AD	ENSG00000198087.7	CD2AP	chr6_47464901_C_T_b38	rs9381563	1.2e-06	-0.14	Muscle - Skeletal
AD	ENSG00000270761.1	RP11-385F7.1	chr6_47464901_C_T_b38	rs9381563	1.4e-05	0.24	Nerve - Tibial
AD	ENSG00000270761.1	RP11-385F7.1	chr6_47464901_C_T_b38	rs9381563	4.7e-06	0.34	Pancreas
AD	ENSG00000270761.1	RP11-385F7.1	chr6_47464901_C_T_b38	rs9381563	3.9e-10	0.44	Pituitary
AD	ENSG00000198087.7	CD2AP	chr6_47464901_C_T_b38	rs9381563	1.6e-09	-0.34	Pituitary
AD	ENSG00000270761.1	RP11-385F7.1	chr6_47464901_C_T_b38	rs9381563	4.4e-07	0.29	Prostate
AD	ENSG00000270761.1	RP11-385F7.1	chr6_47464901_C_T_b38	rs9381563	9.4e-06	0.22	Skin - Sun Exposed (Lower leg)
AD	ENSG00000198087.7	CD2AP	chr6_47464901_C_T_b38	rs9381563	0.00016	-0.07	Skin - Sun Exposed (Lower leg)
AD	ENSG00000270761.1	RP11-385F7.1	chr6_47464901_C_T_b38	rs9381563	4.3e-15	0.37	Thyroid
AD	ENSG00000270761.1	RP11-385F7.1	chr6_47520026_A_G_b38	rs10948363	1.5e-05	-0.24	Adipose - Subcutaneous
AD	ENSG00000270761.1	RP11-385F7.1	chr6_47520026_A_G_b38	rs10948363	1.5e-05	-0.33	Artery - Aorta
AD	ENSG00000164393.8	ADGRF2	chr6_47520026_A_G_b38	rs10948363	1.3e-06	0.27	Artery - Tibial
AD	ENSG00000153294.11	ADGRF4	chr6_47520026_A_G_b38	rs10948363	9.3e-06	0.27	Artery - Tibial
AD	ENSG00000270761.1	RP11-385F7.1	chr6_47520026_A_G_b38	rs10948363	2.7e-05	-0.46	Brain - Caudate (basal ganglia)
AD	ENSG00000270761.1	RP11-385F7.1	chr6_47520026_A_G_b38	rs10948363	3.4e-20	-0.9	Brain - Cerebellar Hemisphere
AD	ENSG00000270761.1	RP11-385F7.1	chr6_47520026_A_G_b38	rs10948363	1.2e-19	-0.85	Brain - Cerebellum
AD	ENSG00000270761.1	RP11-385F7.1	chr6_47520026_A_G_b38	rs10948363	2.3e-05	-0.47	Brain - Cortex
AD	ENSG00000270761.1	RP11-385F7.1	chr6_47520026_A_G_b38	rs10948363	1.9e-05	-0.42	Brain - Nucleus accumbens (basal ganglia)
AD	ENSG00000270761.1	RP11-385F7.1	chr6_47520026_A_G_b38	rs10948363	7.4e-07	-0.6	Brain - Putamen (basal ganglia)
AD	ENSG00000198087.7	CD2AP	chr6_47520026_A_G_b38	rs10948363	1.8e-07	0.13	Cells - Cultured fibroblasts
AD	ENSG00000270761.1	RP11-385F7.1	chr6_47520026_A_G_b38	rs10948363	0.00011	-0.26	Cells - Cultured fibroblasts
AD	ENSG00000270761.1	RP11-385F7.1	chr6_47520026_A_G_b38	rs10948363	1e-05	-0.49	Cells - EBV-transformed lymphocytes
AD	ENSG00000270761.1	RP11-385F7.1	chr6_47520026_A_G_b38	rs10948363	3.8e-07	-0.38	Colon - Sigmoid
AD	ENSG00000270761.1	RP11-385F7.1	chr6_47520026_A_G_b38	rs10948363	1.9e-14	-0.31	Colon - Transverse
AD	ENSG00000198087.7	CD2AP	chr6_47520026_A_G_b38	rs10948363	3.5e-06	0.098	Colon - Transverse
AD	ENSG00000270761.1	RP11-385F7.1	chr6_47520026_A_G_b38	rs10948363	1.7e-07	-0.41	Esophagus - Gastroesophageal Junction
AD	ENSG00000198087.7	CD2AP	chr6_47520026_A_G_b38	rs10948363	4.5e-21	0.2	Esophagus - Mucosa
AD	ENSG00000164393.8	ADGRF2	chr6_47520026_A_G_b38	rs10948363	2.1e-13	0.3	Esophagus - Mucosa
AD	ENSG00000270761.1	RP11-385F7.1	chr6_47520026_A_G_b38	rs10948363	1.2e-09	-0.37	Esophagus - Mucosa
AD	ENSG00000270761.1	RP11-385F7.1	chr6_47520026_A_G_b38	rs10948363	1.1e-08	-0.39	Esophagus - Muscularis
AD	ENSG00000270761.1	RP11-385F7.1	chr6_47520026_A_G_b38	rs10948363	2.5e-05	-0.32	Heart - Atrial Appendage
AD	ENSG00000270761.1	RP11-385F7.1	chr6_47520026_A_G_b38	rs10948363	8e-06	-0.71	Kidney - Cortex
AD	ENSG00000270761.1	RP11-385F7.1	chr6_47520026_A_G_b38	rs10948363	7.9e-13	-0.34	Lung
AD	ENSG00000270761.1	RP11-385F7.1	chr6_47520026_A_G_b38	rs10948363	7.3e-05	-0.21	Muscle - Skeletal
AD	ENSG00000270761.1	RP11-385F7.1	chr6_47520026_A_G_b38	rs10948363	9.9e-12	-0.44	Nerve - Tibial
AD	ENSG00000270761.1	RP11-385F7.1	chr6_47520026_A_G_b38	rs10948363	5.1e-13	-0.57	Pancreas
AD	ENSG00000198087.7	CD2AP	chr6_47520026_A_G_b38	rs10948363	1.3e-05	0.17	Pancreas
AD	ENSG00000198087.7	CD2AP	chr6_47520026_A_G_b38	rs10948363	3.1e-15	0.49	Pituitary
AD	ENSG00000270761.1	RP11-385F7.1	chr6_47520026_A_G_b38	rs10948363	3.2e-15	-0.6	Pituitary
AD	ENSG00000270761.1	RP11-385F7.1	chr6_47520026_A_G_b38	rs10948363	2.9e-15	-0.48	Prostate
AD	ENSG00000164393.8	ADGRF2	chr6_47520026_A_G_b38	rs10948363	8.5e-08	0.15	Skin - Not Sun Exposed (Suprapubic)
AD	ENSG00000270761.1	RP11-385F7.1	chr6_47520026_A_G_b38	rs10948363	2.4e-05	-0.25	Skin - Not Sun Exposed (Suprapubic)
AD	ENSG00000270761.1	RP11-385F7.1	chr6_47520026_A_G_b38	rs10948363	3.9e-10	-0.36	Skin - Sun Exposed (Lower leg)
AD	ENSG00000270761.1	RP11-385F7.1	chr6_47520026_A_G_b38	rs10948363	4.7e-05	-0.32	Small Intestine - Terminal Ileum
AD	ENSG00000270761.1	RP11-385F7.1	chr6_47520026_A_G_b38	rs10948363	5e-07	-0.51	Spleen
AD	ENSG00000270761.1	RP11-385F7.1	chr6_47520026_A_G_b38	rs10948363	3.8e-11	-0.36	Stomach
AD	ENSG00000270761.1	RP11-385F7.1	chr6_47520026_A_G_b38	rs10948363	2.3e-26	-0.54	Thyroid
AD	ENSG00000172247.3	C1QTNF4	chr11_47536319_T_C_b38	rs10838725	2.5e-20	0.34	Adipose - Subcutaneous
AD	ENSG00000110536.13	PTPMT1	chr11_47536319_T_C_b38	rs10838725	3.4e-05	-0.12	Adipose - Subcutaneous
AD	ENSG00000172247.3	C1QTNF4	chr11_47536319_T_C_b38	rs10838725	7.3e-06	0.2	Adipose - Visceral (Omentum)
AD	ENSG00000165917.9	RAPSN	chr11_47536319_T_C_b38	rs10838725	0.00039	0.2	Adipose - Visceral (Omentum)
AD	ENSG00000165923.15	AGBL2	chr11_47536319_T_C_b38	rs10838725	5.6e-05	-0.25	Artery - Aorta
AD	ENSG00000110514.19	MADD	chr11_47536319_T_C_b38	rs10838725	0.00022	-0.14	Artery - Aorta
AD	ENSG00000149187.17	CELF1	chr11_47536319_T_C_b38	rs10838725	0.00027	-0.11	Artery - Aorta
AD	ENSG00000110514.19	MADD	chr11_47536319_T_C_b38	rs10838725	3.6e-05	-0.11	Artery - Tibial
AD	ENSG00000149187.17	CELF1	chr11_47536319_T_C_b38	rs10838725	5.8e-05	-0.079	Artery - Tibial
AD	ENSG00000175213.2	ZNF408	chr11_47536319_T_C_b38	rs10838725	0.0003	0.12	Artery - Tibial
AD	ENSG00000172247.3	C1QTNF4	chr11_47536319_T_C_b38	rs10838725	0.00041	0.14	Artery - Tibial
AD	ENSG00000213619.9	NDUFS3	chr11_47536319_T_C_b38	rs10838725	1.6e-07	-0.2	Brain - Cerebellar Hemisphere
AD	ENSG00000255197.5	RP11-750H9.5	chr11_47536319_T_C_b38	rs10838725	7.6e-07	-0.38	Brain - Cerebellar Hemisphere
AD	ENSG00000196666.4	FAM180B	chr11_47536319_T_C_b38	rs10838725	9.9e-05	-0.32	Brain - Cerebellar Hemisphere
AD	ENSG00000255197.5	RP11-750H9.5	chr11_47536319_T_C_b38	rs10838725	2.2e-06	-0.33	Brain - Cerebellum
AD	ENSG00000196666.4	FAM180B	chr11_47536319_T_C_b38	rs10838725	5.3e-06	-0.36	Brain - Cerebellum
AD	ENSG00000213619.9	NDUFS3	chr11_47536319_T_C_b38	rs10838725	0.00015	-0.21	Brain - Cerebellum
AD	ENSG00000165915.13	SLC39A13	chr11_47536319_T_C_b38	rs10838725	0.00017	-0.15	Brain - Cerebellum
AD	ENSG00000172247.3	C1QTNF4	chr11_47536319_T_C_b38	rs10838725	1.6e-07	0.22	Breast - Mammary Tissue
AD	ENSG00000109920.12	FNBP4	chr11_47536319_T_C_b38	rs10838725	2e-11	-0.18	Cells - Cultured fibroblasts
AD	ENSG00000165915.13	SLC39A13	chr11_47536319_T_C_b38	rs10838725	8.9e-08	0.14	Cells - Cultured fibroblasts
AD	ENSG00000110514.19	MADD	chr11_47536319_T_C_b38	rs10838725	4.9e-07	-0.16	Cells - Cultured fibroblasts
AD	ENSG00000030066.13	NUP160	chr11_47536319_T_C_b38	rs10838725	0.0006	-0.055	Cells - Cultured fibroblasts
AD	ENSG00000149187.17	CELF1	chr11_47536319_T_C_b38	rs10838725	0.0009	-0.067	Cells - Cultured fibroblasts
AD	ENSG00000172247.3	C1QTNF4	chr11_47536319_T_C_b38	rs10838725	2.9e-06	0.19	Colon - Transverse
AD	ENSG00000175220.11	ARHGAP1	chr11_47536319_T_C_b38	rs10838725	9.1e-05	0.2	Esophagus - Gastroesophageal Junction
AD	ENSG00000109919.9	MTCH2	chr11_47536319_T_C_b38	rs10838725	0.00025	-0.084	Esophagus - Gastroesophageal Junction
AD	ENSG00000165912.15	PACSIN3	chr11_47536319_T_C_b38	rs10838725	1.4e-05	-0.13	Esophagus - Mucosa
AD	ENSG00000172247.3	C1QTNF4	chr11_47536319_T_C_b38	rs10838725	0.00031	0.18	Esophagus - Mucosa
AD	ENSG00000110514.19	MADD	chr11_47536319_T_C_b38	rs10838725	8.4e-06	-0.15	Esophagus - Muscularis
AD	ENSG00000175220.11	ARHGAP1	chr11_47536319_T_C_b38	rs10838725	1.2e-05	0.15	Esophagus - Muscularis
AD	ENSG00000172247.3	C1QTNF4	chr11_47536319_T_C_b38	rs10838725	2e-05	0.2	Esophagus - Muscularis
AD	ENSG00000149177.12	PTPRJ	chr11_47536319_T_C_b38	rs10838725	0.00019	-0.15	Esophagus - Muscularis
AD	ENSG00000172247.3	C1QTNF4	chr11_47536319_T_C_b38	rs10838725	7.8e-07	0.43	Liver
AD	ENSG00000165916.8	PSMC3	chr11_47536319_T_C_b38	rs10838725	4.8e-06	-0.18	Liver
AD	ENSG00000172247.3	C1QTNF4	chr11_47536319_T_C_b38	rs10838725	1.5e-10	0.31	Lung
AD	ENSG00000149187.17	CELF1	chr11_47536319_T_C_b38	rs10838725	7.2e-07	-0.11	Lung
AD	ENSG00000109920.12	FNBP4	chr11_47536319_T_C_b38	rs10838725	1.2e-13	-0.18	Muscle - Skeletal
AD	ENSG00000172247.3	C1QTNF4	chr11_47536319_T_C_b38	rs10838725	4.4e-10	0.27	Muscle - Skeletal
AD	ENSG00000109919.9	MTCH2	chr11_47536319_T_C_b38	rs10838725	5.3e-09	-0.11	Muscle - Skeletal
AD	ENSG00000030066.13	NUP160	chr11_47536319_T_C_b38	rs10838725	1.8e-06	-0.16	Muscle - Skeletal
AD	ENSG00000025434.18	NR1H3	chr11_47536319_T_C_b38	rs10838725	1.3e-05	-0.14	Muscle - Skeletal
AD	ENSG00000175220.11	ARHGAP1	chr11_47536319_T_C_b38	rs10838725	0.00017	0.095	Muscle - Skeletal
AD	ENSG00000149187.17	CELF1	chr11_47536319_T_C_b38	rs10838725	2.3e-10	-0.14	Nerve - Tibial
AD	ENSG00000172247.3	C1QTNF4	chr11_47536319_T_C_b38	rs10838725	7.7e-08	0.19	Nerve - Tibial
AD	ENSG00000025434.18	NR1H3	chr11_47536319_T_C_b38	rs10838725	7.5e-06	0.13	Nerve - Tibial
AD	ENSG00000175220.11	ARHGAP1	chr11_47536319_T_C_b38	rs10838725	3.4e-05	0.11	Nerve - Tibial
AD	ENSG00000175224.16	ATG13	chr11_47536319_T_C_b38	rs10838725	0.00021	0.082	Nerve - Tibial
AD	ENSG00000165917.9	RAPSN	chr11_47536319_T_C_b38	rs10838725	0.00037	-0.095	Nerve - Tibial
AD	ENSG00000110514.19	MADD	chr11_47536319_T_C_b38	rs10838725	1.1e-06	-0.19	Pituitary
AD	ENSG00000172247.3	C1QTNF4	chr11_47536319_T_C_b38	rs10838725	3.3e-17	0.4	Skin - Not Sun Exposed (Suprapubic)
AD	ENSG00000030066.13	NUP160	chr11_47536319_T_C_b38	rs10838725	2.2e-05	-0.13	Skin - Not Sun Exposed (Suprapubic)
AD	ENSG00000025434.18	NR1H3	chr11_47536319_T_C_b38	rs10838725	4.6e-05	-0.11	Skin - Not Sun Exposed (Suprapubic)
AD	ENSG00000110514.19	MADD	chr11_47536319_T_C_b38	rs10838725	5.5e-05	-0.09	Skin - Not Sun Exposed (Suprapubic)
AD	ENSG00000172247.3	C1QTNF4	chr11_47536319_T_C_b38	rs10838725	8.6e-17	0.34	Skin - Sun Exposed (Lower leg)
AD	ENSG00000110514.19	MADD	chr11_47536319_T_C_b38	rs10838725	1.1e-06	-0.098	Skin - Sun Exposed (Lower leg)
AD	ENSG00000134574.11	DDB2	chr11_47536319_T_C_b38	rs10838725	1.1e-05	-0.11	Skin - Sun Exposed (Lower leg)
AD	ENSG00000109920.12	FNBP4	chr11_47536319_T_C_b38	rs10838725	1.8e-05	-0.083	Skin - Sun Exposed (Lower leg)
AD	ENSG00000165917.9	RAPSN	chr11_47536319_T_C_b38	rs10838725	7.5e-05	-0.16	Skin - Sun Exposed (Lower leg)
AD	ENSG00000030066.13	NUP160	chr11_47536319_T_C_b38	rs10838725	8.9e-05	-0.11	Skin - Sun Exposed (Lower leg)
AD	ENSG00000175220.11	ARHGAP1	chr11_47536319_T_C_b38	rs10838725	0.00032	0.081	Skin - Sun Exposed (Lower leg)
AD	ENSG00000165915.13	SLC39A13	chr11_47536319_T_C_b38	rs10838725	0.00056	-0.098	Skin - Sun Exposed (Lower leg)
AD	ENSG00000172247.3	C1QTNF4	chr11_47536319_T_C_b38	rs10838725	2.3e-05	0.31	Small Intestine - Terminal Ileum
AD	ENSG00000172247.3	C1QTNF4	chr11_47536319_T_C_b38	rs10838725	1.2e-09	0.51	Spleen
AD	ENSG00000172247.3	C1QTNF4	chr11_47536319_T_C_b38	rs10838725	3.5e-07	0.22	Testis
AD	ENSG00000109919.9	MTCH2	chr11_47536319_T_C_b38	rs10838725	6.1e-07	-0.11	Testis
AD	ENSG00000110514.19	MADD	chr11_47536319_T_C_b38	rs10838725	2.7e-05	-0.21	Testis
AD	ENSG00000165915.13	SLC39A13	chr11_47536319_T_C_b38	rs10838725	6.8e-05	-0.1	Testis
AD	ENSG00000109920.12	FNBP4	chr11_47536319_T_C_b38	rs10838725	0.00017	-0.1	Testis
AD	ENSG00000172247.3	C1QTNF4	chr11_47536319_T_C_b38	rs10838725	6.8e-07	0.19	Thyroid
AD	ENSG00000165915.13	SLC39A13	chr11_47536319_T_C_b38	rs10838725	5e-05	-0.084	Thyroid
AD	ENSG00000165923.15	AGBL2	chr11_47536319_T_C_b38	rs10838725	6.5e-05	-0.089	Thyroid
AD	ENSG00000149187.17	CELF1	chr11_47536319_T_C_b38	rs10838725	0.00049	-0.079	Thyroid
AD	ENSG00000172247.3	C1QTNF4	chr11_47536319_T_C_b38	rs10838725	2.2e-09	0.27	Whole Blood
AD	ENSG00000134571.10	MYBPC3	chr11_47536319_T_C_b38	rs10838725	2.1e-07	0.1	Whole Blood
AD	ENSG00000149177.12	PTPRJ	chr11_47536319_T_C_b38	rs10838725	1.7e-05	-0.068	Whole Blood
AD	ENSG00000109920.12	FNBP4	chr11_47536319_T_C_b38	rs10838725	4.7e-05	-0.047	Whole Blood
AD	ENSG00000110514.19	MADD	chr11_47536319_T_C_b38	rs10838725	0.00021	-0.067	Whole Blood
AD	ENSG00000149534.8	MS4A2	chr11_60171834_T_G_b38	rs610932	1.5e-06	-0.15	Adipose - Subcutaneous
AD	ENSG00000254952.1	AP001257.1	chr11_60171834_T_G_b38	rs610932	9.1e-05	-0.17	Adipose - Subcutaneous
AD	ENSG00000110077.14	MS4A6A	chr11_60171834_T_G_b38	rs610932	0.00021	0.077	Artery - Tibial
AD	ENSG00000149534.8	MS4A2	chr11_60171834_T_G_b38	rs610932	1.7e-06	-0.21	Colon - Transverse
AD	ENSG00000149534.8	MS4A2	chr11_60171834_T_G_b38	rs610932	6e-05	-0.18	Esophagus - Mucosa
AD	ENSG00000149534.8	MS4A2	chr11_60171834_T_G_b38	rs610932	5e-05	-0.097	Esophagus - Muscularis
AD	ENSG00000214787.9	MS4A4E	chr11_60171834_T_G_b38	rs610932	2.6e-05	0.14	Lung
AD	ENSG00000214787.9	MS4A4E	chr11_60171834_T_G_b38	rs610932	0.00014	0.11	Nerve - Tibial
AD	ENSG00000149534.8	MS4A2	chr11_60171834_T_G_b38	rs610932	2.3e-05	-0.25	Pancreas
AD	ENSG00000149534.8	MS4A2	chr11_60171834_T_G_b38	rs610932	1.8e-06	-0.13	Skin - Sun Exposed (Lower leg)
AD	ENSG00000214787.9	MS4A4E	chr11_60171834_T_G_b38	rs610932	4.9e-05	0.18	Spleen
AD	ENSG00000149534.8	MS4A2	chr11_60171834_T_G_b38	rs610932	4e-08	-0.28	Stomach
AD	ENSG00000110077.14	MS4A6A	chr11_60171834_T_G_b38	rs610932	2.6e-19	0.13	Whole Blood
AD	ENSG00000110079.16	MS4A4A	chr11_60171834_T_G_b38	rs610932	0.00014	0.068	Whole Blood
AD	ENSG00000149534.8	MS4A2	chr11_60156035_A_G_b38	rs983392	0.00021	0.13	Adipose - Subcutaneous
AD	ENSG00000149534.8	MS4A2	chr11_60156035_A_G_b38	rs983392	1.4e-06	0.23	Colon - Transverse
AD	ENSG00000149534.8	MS4A2	chr11_60156035_A_G_b38	rs983392	3.6e-06	0.22	Esophagus - Mucosa
AD	ENSG00000149534.8	MS4A2	chr11_60156035_A_G_b38	rs983392	8.1e-06	0.3	Pancreas
AD	ENSG00000149534.8	MS4A2	chr11_60156035_A_G_b38	rs983392	4.5e-06	0.13	Skin - Sun Exposed (Lower leg)
AD	ENSG00000149534.8	MS4A2	chr11_60156035_A_G_b38	rs983392	1.3e-06	0.28	Stomach
AD	ENSG00000110077.14	MS4A6A	chr11_60156035_A_G_b38	rs983392	2.5e-10	-0.1	Whole Blood
AD	ENSG00000149534.8	MS4A2	chr11_60255614_C_A_b38	rs1562990	0.00014	-0.13	Adipose - Subcutaneous
AD	ENSG00000214787.9	MS4A4E	chr11_60255614_C_A_b38	rs1562990	7.9e-05	0.12	Adipose - Visceral (Omentum)
AD	ENSG00000149534.8	MS4A2	chr11_60255614_C_A_b38	rs1562990	1.8e-06	-0.22	Colon - Transverse
AD	ENSG00000214787.9	MS4A4E	chr11_60255614_C_A_b38	rs1562990	8.7e-05	0.14	Lung
AD	ENSG00000214787.9	MS4A4E	chr11_60255614_C_A_b38	rs1562990	1.7e-05	0.13	Nerve - Tibial
AD	ENSG00000149534.8	MS4A2	chr11_60255614_C_A_b38	rs1562990	6.5e-05	-0.26	Pancreas
AD	ENSG00000214787.9	MS4A4E	chr11_60255614_C_A_b38	rs1562990	5.9e-06	0.22	Spleen
AD	ENSG00000149534.8	MS4A2	chr11_60255614_C_A_b38	rs1562990	1.6e-05	-0.23	Stomach
AD	ENSG00000110077.14	MS4A6A	chr11_60255614_C_A_b38	rs1562990	3.8e-17	0.13	Whole Blood
AD	ENSG00000110079.16	MS4A4A	chr11_60255614_C_A_b38	rs1562990	3.7e-05	0.077	Whole Blood
AD	ENSG00000149534.8	MS4A2	chr11_60254475_G_A_b38	rs1582763	4.7e-05	0.16	Adipose - Visceral (Omentum)
AD	ENSG00000255139.1	AP000442.1	chr11_60254475_G_A_b38	rs1582763	9.3e-06	-0.21	Colon - Sigmoid
AD	ENSG00000149534.8	MS4A2	chr11_60254475_G_A_b38	rs1582763	7.4e-06	0.21	Colon - Transverse
AD	ENSG00000149534.8	MS4A2	chr11_60254475_G_A_b38	rs1582763	4.3e-05	0.24	Stomach
AD	ENSG00000149516.13	MS4A3	chr11_60254475_G_A_b38	rs1582763	7.4e-05	0.27	Testis
AD	ENSG00000110077.14	MS4A6A	chr11_60254475_G_A_b38	rs1582763	6.9e-12	-0.11	Whole Blood
AD	ENSG00000254952.1	AP001257.1	chr11_60254475_G_A_b38	rs1582763	0.00015	-0.12	Whole Blood
AD	ENSG00000149534.8	MS4A2	chr11_60190907_C_A_b38	rs2081545	2.8e-05	0.14	Adipose - Subcutaneous
AD	ENSG00000149534.8	MS4A2	chr11_60190907_C_A_b38	rs2081545	8.3e-05	0.15	Adipose - Visceral (Omentum)
AD	ENSG00000149534.8	MS4A2	chr11_60190907_C_A_b38	rs2081545	6.9e-07	0.23	Colon - Transverse
AD	ENSG00000149534.8	MS4A2	chr11_60190907_C_A_b38	rs2081545	9.1e-05	0.18	Esophagus - Mucosa
AD	ENSG00000214787.9	MS4A4E	chr11_60190907_C_A_b38	rs2081545	7.2e-05	-0.14	Lung
AD	ENSG00000214787.9	MS4A4E	chr11_60190907_C_A_b38	rs2081545	3.4e-05	-0.13	Nerve - Tibial
AD	ENSG00000149534.8	MS4A2	chr11_60190907_C_A_b38	rs2081545	1.5e-06	0.32	Pancreas
AD	ENSG00000149534.8	MS4A2	chr11_60190907_C_A_b38	rs2081545	0.0001	0.11	Skin - Sun Exposed (Lower leg)
AD	ENSG00000149534.8	MS4A2	chr11_60190907_C_A_b38	rs2081545	2e-06	0.26	Stomach
AD	ENSG00000149516.13	MS4A3	chr11_60190907_C_A_b38	rs2081545	0.00011	0.26	Testis
AD	ENSG00000110077.14	MS4A6A	chr11_60190907_C_A_b38	rs2081545	1.6e-16	-0.13	Whole Blood
AD	ENSG00000149534.8	MS4A2	chr11_60266956_C_T_b38	rs4938933	0.00011	-0.13	Adipose - Subcutaneous
AD	ENSG00000214787.9	MS4A4E	chr11_60266956_C_T_b38	rs4938933	6.5e-05	0.12	Adipose - Visceral (Omentum)
AD	ENSG00000110077.14	MS4A6A	chr11_60266956_C_T_b38	rs4938933	6.9e-05	0.08	Adipose - Visceral (Omentum)
AD	ENSG00000149534.8	MS4A2	chr11_60266956_C_T_b38	rs4938933	3.4e-06	-0.21	Colon - Transverse
AD	ENSG00000214787.9	MS4A4E	chr11_60266956_C_T_b38	rs4938933	5.9e-06	0.13	Nerve - Tibial
AD	ENSG00000149534.8	MS4A2	chr11_60266956_C_T_b38	rs4938933	0.00013	-0.1	Skin - Sun Exposed (Lower leg)
AD	ENSG00000214787.9	MS4A4E	chr11_60266956_C_T_b38	rs4938933	2.6e-06	0.22	Spleen
AD	ENSG00000149534.8	MS4A2	chr11_60266956_C_T_b38	rs4938933	7.1e-05	-0.21	Stomach
AD	ENSG00000149516.13	MS4A3	chr11_60266956_C_T_b38	rs4938933	7.1e-05	-0.26	Testis
AD	ENSG00000110077.14	MS4A6A	chr11_60266956_C_T_b38	rs4938933	0.00011	0.15	Testis
AD	ENSG00000110077.14	MS4A6A	chr11_60266956_C_T_b38	rs4938933	9.6e-17	0.12	Whole Blood
AD	ENSG00000110079.16	MS4A4A	chr11_60266956_C_T_b38	rs4938933	8.1e-05	0.071	Whole Blood
AD	ENSG00000149534.8	MS4A2	chr11_60175342_A_G_b38	rs7935829	1.1e-05	0.15	Adipose - Subcutaneous
AD	ENSG00000149534.8	MS4A2	chr11_60175342_A_G_b38	rs7935829	3.9e-05	0.15	Adipose - Visceral (Omentum)
AD	ENSG00000149534.8	MS4A2	chr11_60175342_A_G_b38	rs7935829	1.9e-06	0.22	Colon - Transverse
AD	ENSG00000214787.9	MS4A4E	chr11_60175342_A_G_b38	rs7935829	9.1e-05	-0.14	Lung
AD	ENSG00000214787.9	MS4A4E	chr11_60175342_A_G_b38	rs7935829	4.1e-05	-0.12	Nerve - Tibial
AD	ENSG00000149534.8	MS4A2	chr11_60175342_A_G_b38	rs7935829	4.2e-06	0.3	Pancreas
AD	ENSG00000149534.8	MS4A2	chr11_60175342_A_G_b38	rs7935829	6.5e-05	0.11	Skin - Sun Exposed (Lower leg)
AD	ENSG00000149534.8	MS4A2	chr11_60175342_A_G_b38	rs7935829	1.6e-05	0.23	Stomach
AD	ENSG00000110077.14	MS4A6A	chr11_60175342_A_G_b38	rs7935829	4.9e-18	-0.13	Whole Blood
AD	ENSG00000149534.8	MS4A2	chr11_60161199_G_C_b38	rs11605427	1.5e-05	0.15	Adipose - Subcutaneous
AD	ENSG00000149534.8	MS4A2	chr11_60161199_G_C_b38	rs11605427	4.6e-07	0.24	Colon - Transverse
AD	ENSG00000149534.8	MS4A2	chr11_60161199_G_C_b38	rs11605427	1.5e-05	0.2	Esophagus - Mucosa
AD	ENSG00000149534.8	MS4A2	chr11_60161199_G_C_b38	rs11605427	0.00013	0.098	Esophagus - Muscularis
AD	ENSG00000214787.9	MS4A4E	chr11_60161199_G_C_b38	rs11605427	0.00012	-0.14	Lung
AD	ENSG00000149534.8	MS4A2	chr11_60161199_G_C_b38	rs11605427	2e-06	0.32	Pancreas
AD	ENSG00000149534.8	MS4A2	chr11_60161199_G_C_b38	rs11605427	1.4e-05	0.12	Skin - Sun Exposed (Lower leg)
AD	ENSG00000149534.8	MS4A2	chr11_60161199_G_C_b38	rs11605427	9.3e-07	0.28	Stomach
AD	ENSG00000149516.13	MS4A3	chr11_60161199_G_C_b38	rs11605427	9e-05	0.26	Testis
AD	ENSG00000110042.7	DTX4	chr11_60161199_G_C_b38	rs11605427	0.00037	-0.12	Thyroid
AD	ENSG00000110077.14	MS4A6A	chr11_60161199_G_C_b38	rs11605427	1.6e-15	-0.13	Whole Blood
AD	ENSG00000073921.17	PICALM	chr11_86076782_C_T_b38	rs536841	0.0002	0.075	Cells - Cultured fibroblasts
AD	ENSG00000279742.1	RP11-700A24.1	chr11_86076782_C_T_b38	rs536841	1.4e-06	-0.23	Thyroid
AD	ENSG00000073921.17	PICALM	chr11_86089237_G_A_b38	rs561655	1.3e-07	0.1	Cells - Cultured fibroblasts
AD	ENSG00000279742.1	RP11-700A24.1	chr11_86089237_G_A_b38	rs561655	9.1e-05	-0.18	Thyroid
AD	ENSG00000073921.17	PICALM	chr11_86065502_G_A_b38	rs867611	9.6e-05	0.078	Cells - Cultured fibroblasts
AD	ENSG00000279742.1	RP11-700A24.1	chr11_86065502_G_A_b38	rs867611	4.9e-06	-0.22	Thyroid
AD	ENSG00000272541.1	XXbac-BPGBPG55C20.1	chr6_58045670_T_G_b38	rs1936246	0.00021	-0.21	Adipose - Visceral (Omentum)
AD	ENSG00000272541.1	XXbac-BPGBPG55C20.1	chr6_58045670_T_G_b38	rs1936246	4.4e-07	-0.34	Artery - Aorta
AD	ENSG00000272541.1	XXbac-BPGBPG55C20.1	chr6_58045670_T_G_b38	rs1936246	4.9e-05	-0.42	Artery - Coronary
AD	ENSG00000272541.1	XXbac-BPGBPG55C20.1	chr6_58045670_T_G_b38	rs1936246	4.5e-07	-0.29	Artery - Tibial
AD	ENSG00000239650.4	GUSBP4	chr6_58045670_T_G_b38	rs1936246	0.00019	0.15	Breast - Mammary Tissue
AD	ENSG00000215190.9	LINC00680	chr6_58045670_T_G_b38	rs1936246	0.00048	-0.16	Cells - Cultured fibroblasts
AD	ENSG00000272541.1	XXbac-BPGBPG55C20.1	chr6_58045670_T_G_b38	rs1936246	0.00031	-0.26	Colon - Sigmoid
AD	ENSG00000272541.1	XXbac-BPGBPG55C20.1	chr6_58045670_T_G_b38	rs1936246	1.3e-05	-0.29	Colon - Transverse
AD	ENSG00000272541.1	XXbac-BPGBPG55C20.1	chr6_58045670_T_G_b38	rs1936246	5.7e-05	-0.28	Esophagus - Gastroesophageal Junction
AD	ENSG00000272541.1	XXbac-BPGBPG55C20.1	chr6_58045670_T_G_b38	rs1936246	1.7e-06	-0.29	Esophagus - Muscularis
AD	ENSG00000272541.1	XXbac-BPGBPG55C20.1	chr6_58045670_T_G_b38	rs1936246	2e-06	-0.22	Muscle - Skeletal
AD	ENSG00000272316.1	XXbac-BPGBPG55C20.2	chr6_58045670_T_G_b38	rs1936246	2.7e-09	0.17	Nerve - Tibial
AD	ENSG00000239650.4	GUSBP4	chr6_58045670_T_G_b38	rs1936246	1.2e-08	0.21	Nerve - Tibial
AD	ENSG00000272541.1	XXbac-BPGBPG55C20.1	chr6_58045670_T_G_b38	rs1936246	1.6e-05	0.21	Testis
AD	ENSG00000215190.9	LINC00680	chr6_58045670_T_G_b38	rs1936246	0.0002	-0.24	Testis
AD	ENSG00000272541.1	XXbac-BPGBPG55C20.1	chr6_58045670_T_G_b38	rs1936246	0.00039	-0.17	Thyroid
AD	ENSG00000130203.9	APOE	chr19_44908822_C_T_b38	rs7412	1.2e-07	-0.26	Skin - Not Sun Exposed (Suprapubic)
AD	ENSG00000214855.9	APOC1P1	chr19_44922203_A_G_b38	rs157595	2.8e-06	-0.24	Adipose - Subcutaneous
AD	ENSG00000130208.9	APOC1	chr19_44922203_A_G_b38	rs157595	5.3e-05	-0.32	Adrenal Gland
AD	ENSG00000214855.9	APOC1P1	chr19_44922203_A_G_b38	rs157595	1.9e-09	-0.3	Cells - Cultured fibroblasts
AD	ENSG00000214855.9	APOC1P1	chr19_44922203_A_G_b38	rs157595	5.6e-08	-0.42	Liver
AD	ENSG00000130203.9	APOE	chr19_44922203_A_G_b38	rs157595	1.6e-17	-0.25	Skin - Not Sun Exposed (Suprapubic)
AD	ENSG00000130208.9	APOC1	chr19_44922203_A_G_b38	rs157595	4e-06	-0.15	Skin - Not Sun Exposed (Suprapubic)
AD	ENSG00000130203.9	APOE	chr19_44922203_A_G_b38	rs157595	2.6e-16	-0.25	Skin - Sun Exposed (Lower leg)
AD	ENSG00000130208.9	APOC1	chr19_44922203_A_G_b38	rs157595	2.6e-05	-0.16	Skin - Sun Exposed (Lower leg)
AD	ENSG00000214855.9	APOC1P1	chr19_44922203_A_G_b38	rs157595	0.00012	-0.21	Skin - Sun Exposed (Lower leg)
AD	ENSG00000130203.9	APOE	chr19_44922203_A_G_b38	rs157595	2.7e-06	-0.26	Testis
AD	ENSG00000130208.9	APOC1	chr19_44922203_A_G_b38	rs157595	3.6e-06	-0.29	Testis
AD	ENSG00000266903.1	CTB-171A8.1	chr19_44922203_A_G_b38	rs157595	1.2e-05	0.27	Thyroid
AD	ENSG00000214855.9	APOC1P1	chr19_44905579_T_G_b38	rs405509	3.4e-07	-0.23	Cells - Cultured fibroblasts
AD	ENSG00000130203.9	APOE	chr19_44905579_T_G_b38	rs405509	1.5e-07	-0.14	Skin - Not Sun Exposed (Suprapubic)
AD	ENSG00000130203.9	APOE	chr19_44905579_T_G_b38	rs405509	1.7e-08	-0.16	Skin - Sun Exposed (Lower leg)
AD	ENSG00000130208.9	APOC1	chr19_44908684_T_C_b38	rs429358	4.8e-05	-0.36	Adrenal Gland
AD	ENSG00000130208.9	APOC1	chr19_44908684_T_C_b38	rs429358	2.3e-05	-0.28	Esophagus - Mucosa
AD	ENSG00000267282.1	CTB-129P6.4	chr19_44908684_T_C_b38	rs429358	4.1e-05	0.3	Esophagus - Muscularis
AD	ENSG00000266903.1	CTB-171A8.1	chr19_44908684_T_C_b38	rs429358	0.00012	0.3	Thyroid
AD	ENSG00000214855.9	APOC1P1	chr19_44911194_T_C_b38	rs439401	4e-06	-0.24	Adipose - Subcutaneous
AD	ENSG00000130208.9	APOC1	chr19_44911194_T_C_b38	rs439401	6.6e-06	-0.24	Adipose - Visceral (Omentum)
AD	ENSG00000130208.9	APOC1	chr19_44911194_T_C_b38	rs439401	3e-06	-0.37	Adrenal Gland
AD	ENSG00000214855.9	APOC1P1	chr19_44911194_T_C_b38	rs439401	4.4e-06	-0.39	Adrenal Gland
AD	ENSG00000214855.9	APOC1P1	chr19_44911194_T_C_b38	rs439401	1e-07	-0.27	Cells - Cultured fibroblasts
AD	ENSG00000214855.9	APOC1P1	chr19_44911194_T_C_b38	rs439401	2.7e-06	-0.37	Liver
AD	ENSG00000130203.9	APOE	chr19_44911194_T_C_b38	rs439401	1.3e-25	-0.3	Skin - Not Sun Exposed (Suprapubic)
AD	ENSG00000130208.9	APOC1	chr19_44911194_T_C_b38	rs439401	3.8e-08	-0.17	Skin - Not Sun Exposed (Suprapubic)
AD	ENSG00000130203.9	APOE	chr19_44911194_T_C_b38	rs439401	1.5e-21	-0.29	Skin - Sun Exposed (Lower leg)
AD	ENSG00000130208.9	APOC1	chr19_44911194_T_C_b38	rs439401	1e-06	-0.19	Skin - Sun Exposed (Lower leg)
AD	ENSG00000130203.9	APOE	chr19_44911194_T_C_b38	rs439401	7.1e-08	-0.3	Testis
AD	ENSG00000130208.9	APOC1	chr19_44911194_T_C_b38	rs439401	1.8e-06	-0.31	Testis
AD	ENSG00000266903.1	CTB-171A8.1	chr19_44911194_T_C_b38	rs439401	2.7e-05	0.26	Thyroid
AD	ENSG00000130208.9	APOC1	chr19_44905910_C_G_b38	rs440446	1.7e-05	-0.31	Adrenal Gland
AD	ENSG00000176761.7	ZNF285B	chr19_44905910_C_G_b38	rs440446	8.7e-05	-0.23	Artery - Tibial
AD	ENSG00000214855.9	APOC1P1	chr19_44905910_C_G_b38	rs440446	3.5e-06	-0.23	Cells - Cultured fibroblasts
AD	ENSG00000130203.9	APOE	chr19_44905910_C_G_b38	rs440446	9.1e-16	-0.23	Skin - Not Sun Exposed (Suprapubic)
AD	ENSG00000130208.9	APOC1	chr19_44905910_C_G_b38	rs440446	1.6e-06	-0.15	Skin - Not Sun Exposed (Suprapubic)
AD	ENSG00000130203.9	APOE	chr19_44905910_C_G_b38	rs440446	2.7e-16	-0.25	Skin - Sun Exposed (Lower leg)
AD	ENSG00000130208.9	APOC1	chr19_44905910_C_G_b38	rs440446	2e-05	-0.17	Skin - Sun Exposed (Lower leg)
AD	ENSG00000130202.9	NECTIN2	chr19_44905307_A_T_b38	rs449647	2.9e-07	0.31	Whole Blood
AD	ENSG00000130208.9	APOC1	chr19_44912921_G_T_b38	rs483082	2e-06	-0.37	Adrenal Gland
AD	ENSG00000130208.9	APOC1	chr19_44912921_G_T_b38	rs483082	5.7e-06	-0.26	Esophagus - Mucosa
AD	ENSG00000130203.9	APOE	chr19_44912921_G_T_b38	rs483082	1.2e-10	-0.2	Skin - Not Sun Exposed (Suprapubic)
AD	ENSG00000130208.9	APOC1	chr19_44912921_G_T_b38	rs483082	3e-05	-0.14	Skin - Not Sun Exposed (Suprapubic)
AD	ENSG00000130203.9	APOE	chr19_44912921_G_T_b38	rs483082	2.5e-06	-0.16	Skin - Sun Exposed (Lower leg)
AD	ENSG00000214855.9	APOC1P1	chr19_44913221_A_G_b38	rs584007	2.3e-06	-0.25	Adipose - Subcutaneous
AD	ENSG00000130208.9	APOC1	chr19_44913221_A_G_b38	rs584007	3.6e-06	-0.25	Adipose - Visceral (Omentum)
AD	ENSG00000130208.9	APOC1	chr19_44913221_A_G_b38	rs584007	3e-06	-0.37	Adrenal Gland
AD	ENSG00000214855.9	APOC1P1	chr19_44913221_A_G_b38	rs584007	4.4e-06	-0.39	Adrenal Gland
AD	ENSG00000130208.9	APOC1	chr19_44913221_A_G_b38	rs584007	1.9e-05	-0.24	Brain - Nucleus accumbens (basal ganglia)
AD	ENSG00000214855.9	APOC1P1	chr19_44913221_A_G_b38	rs584007	1.2e-07	-0.27	Cells - Cultured fibroblasts
AD	ENSG00000214855.9	APOC1P1	chr19_44913221_A_G_b38	rs584007	3.9e-06	-0.36	Liver
AD	ENSG00000130203.9	APOE	chr19_44913221_A_G_b38	rs584007	4.2e-26	-0.3	Skin - Not Sun Exposed (Suprapubic)
AD	ENSG00000130208.9	APOC1	chr19_44913221_A_G_b38	rs584007	2.3e-08	-0.18	Skin - Not Sun Exposed (Suprapubic)
AD	ENSG00000130203.9	APOE	chr19_44913221_A_G_b38	rs584007	6.3e-21	-0.29	Skin - Sun Exposed (Lower leg)
AD	ENSG00000130208.9	APOC1	chr19_44913221_A_G_b38	rs584007	1.1e-06	-0.19	Skin - Sun Exposed (Lower leg)
AD	ENSG00000130203.9	APOE	chr19_44913221_A_G_b38	rs584007	1.4e-07	-0.29	Testis
AD	ENSG00000130208.9	APOC1	chr19_44913221_A_G_b38	rs584007	2.8e-06	-0.3	Testis
AD	ENSG00000266903.1	CTB-171A8.1	chr19_44913221_A_G_b38	rs584007	3.7e-05	0.26	Thyroid
AD	ENSG00000266903.1	CTB-171A8.1	chr19_44906745_G_A_b38	rs769449	3.3e-05	0.34	Adipose - Subcutaneous
AD	ENSG00000130208.9	APOC1	chr19_44906745_G_A_b38	rs769449	6.2e-05	-0.31	Esophagus - Mucosa
AD	ENSG00000267282.1	CTB-129P6.4	chr19_44906745_G_A_b38	rs769449	0.0001	0.33	Esophagus - Muscularis
AD	ENSG00000266903.1	CTB-171A8.1	chr19_44906745_G_A_b38	rs769449	3.4e-05	0.38	Thyroid
AD	ENSG00000214855.9	APOC1P1	chr19_44907187_G_A_b38	rs769450	9.1e-05	-0.18	Cells - Cultured fibroblasts
AD	ENSG00000062370.16	ZNF112	chr19_44917843_G_A_b38	rs3925681	1.3e-05	-0.39	Brain - Anterior cingulate cortex (BA24)
AD	ENSG00000130208.9	APOC1	chr19_44919689_A_G_b38	rs4420638	1.2e-05	-0.37	Adrenal Gland
AD	ENSG00000130208.9	APOC1	chr19_44919689_A_G_b38	rs4420638	5.9e-05	-0.25	Esophagus - Mucosa
AD	ENSG00000130203.9	APOE	chr19_44919689_A_G_b38	rs4420638	2.4e-05	-0.14	Skin - Not Sun Exposed (Suprapubic)
AD	ENSG00000130203.9	APOE	chr19_44919689_A_G_b38	rs4420638	3.8e-05	-0.15	Skin - Sun Exposed (Lower leg)
AD	ENSG00000130208.9	APOC1	chr19_44919689_A_G_b38	rs4420638	6.9e-05	-0.18	Skin - Sun Exposed (Lower leg)
AD	ENSG00000214855.9	APOC1P1	chr19_44904531_G_A_b38	rs7259620	1.2e-06	-0.22	Cells - Cultured fibroblasts
AD	ENSG00000130208.9	APOC1	chr19_44904531_G_A_b38	rs7259620	2.2e-05	-0.23	Heart - Atrial Appendage
AD	ENSG00000130203.9	APOE	chr19_44904531_G_A_b38	rs7259620	6.4e-05	-0.2	Heart - Atrial Appendage
AD	ENSG00000130203.9	APOE	chr19_44904531_G_A_b38	rs7259620	2.9e-05	-0.12	Skin - Sun Exposed (Lower leg)
AD	ENSG00000130208.9	APOC1	chr19_44919589_G_A_b38	rs56131196	1.2e-05	-0.37	Adrenal Gland
AD	ENSG00000130208.9	APOC1	chr19_44919589_G_A_b38	rs56131196	5.9e-05	-0.25	Esophagus - Mucosa
AD	ENSG00000130203.9	APOE	chr19_44919589_G_A_b38	rs56131196	2.4e-05	-0.14	Skin - Not Sun Exposed (Suprapubic)
AD	ENSG00000130203.9	APOE	chr19_44919589_G_A_b38	rs56131196	3.8e-05	-0.15	Skin - Sun Exposed (Lower leg)
AD	ENSG00000130208.9	APOC1	chr19_44919589_G_A_b38	rs56131196	6.9e-05	-0.18	Skin - Sun Exposed (Lower leg)
PD	ENSG00000237541.3	HLA-DQA2	chr6_32420032_T_C_b38	rs2395163	8.2e-49	1	Adipose - Subcutaneous
PD	ENSG00000229391.7	HLA-DRB6	chr6_32420032_T_C_b38	rs2395163	5.9e-33	0.81	Adipose - Subcutaneous
PD	ENSG00000196735.11	HLA-DQA1	chr6_32420032_T_C_b38	rs2395163	9.9e-11	-0.32	Adipose - Subcutaneous
PD	ENSG00000196126.11	HLA-DRB1	chr6_32420032_T_C_b38	rs2395163	1e-10	-0.27	Adipose - Subcutaneous
PD	ENSG00000179344.16	HLA-DQB1	chr6_32420032_T_C_b38	rs2395163	9.5e-09	-0.35	Adipose - Subcutaneous
PD	ENSG00000232629.8	HLA-DQB2	chr6_32420032_T_C_b38	rs2395163	7.5e-08	0.39	Adipose - Subcutaneous
PD	ENSG00000240053.8	LY6G5B	chr6_32420032_T_C_b38	rs2395163	2.8e-06	-0.11	Adipose - Subcutaneous
PD	ENSG00000250535.1	STK19B	chr6_32420032_T_C_b38	rs2395163	4.9e-06	0.31	Adipose - Subcutaneous
PD	ENSG00000204301.6	NOTCH4	chr6_32420032_T_C_b38	rs2395163	9.5e-06	0.13	Adipose - Subcutaneous
PD	ENSG00000204344.14	STK19	chr6_32420032_T_C_b38	rs2395163	1.1e-05	-0.18	Adipose - Subcutaneous
PD	ENSG00000204314.10	PRRT1	chr6_32420032_T_C_b38	rs2395163	2.1e-05	0.13	Adipose - Subcutaneous
PD	ENSG00000225914.1	XXbac-BPG154L12.4	chr6_32420032_T_C_b38	rs2395163	3.6e-05	0.28	Adipose - Subcutaneous
PD	ENSG00000196301.3	HLA-DRB9	chr6_32420032_T_C_b38	rs2395163	8.6e-05	0.27	Adipose - Subcutaneous
PD	ENSG00000228962.1	HCG23	chr6_32420032_T_C_b38	rs2395163	0.00021	0.21	Adipose - Subcutaneous
PD	ENSG00000237541.3	HLA-DQA2	chr6_32420032_T_C_b38	rs2395163	1.5e-35	1	Adipose - Visceral (Omentum)
PD	ENSG00000229391.7	HLA-DRB6	chr6_32420032_T_C_b38	rs2395163	5.7e-25	0.78	Adipose - Visceral (Omentum)
PD	ENSG00000196126.11	HLA-DRB1	chr6_32420032_T_C_b38	rs2395163	8.6e-07	-0.24	Adipose - Visceral (Omentum)
PD	ENSG00000196301.3	HLA-DRB9	chr6_32420032_T_C_b38	rs2395163	2.8e-06	0.38	Adipose - Visceral (Omentum)
PD	ENSG00000179344.16	HLA-DQB1	chr6_32420032_T_C_b38	rs2395163	8.9e-05	-0.28	Adipose - Visceral (Omentum)
PD	ENSG00000237541.3	HLA-DQA2	chr6_32420032_T_C_b38	rs2395163	7.2e-26	1.2	Adrenal Gland
PD	ENSG00000229391.7	HLA-DRB6	chr6_32420032_T_C_b38	rs2395163	6e-13	0.85	Adrenal Gland
PD	ENSG00000232629.8	HLA-DQB2	chr6_32420032_T_C_b38	rs2395163	1.2e-06	0.59	Adrenal Gland
PD	ENSG00000237541.3	HLA-DQA2	chr6_32420032_T_C_b38	rs2395163	2.9e-28	0.81	Artery - Aorta
PD	ENSG00000229391.7	HLA-DRB6	chr6_32420032_T_C_b38	rs2395163	9.5e-21	0.59	Artery - Aorta
PD	ENSG00000196126.11	HLA-DRB1	chr6_32420032_T_C_b38	rs2395163	2.4e-06	-0.19	Artery - Aorta
PD	ENSG00000196301.3	HLA-DRB9	chr6_32420032_T_C_b38	rs2395163	2.6e-06	0.34	Artery - Aorta
PD	ENSG00000196735.11	HLA-DQA1	chr6_32420032_T_C_b38	rs2395163	3.7e-06	-0.23	Artery - Aorta
PD	ENSG00000250535.1	STK19B	chr6_32420032_T_C_b38	rs2395163	6.1e-06	0.37	Artery - Aorta
PD	ENSG00000232629.8	HLA-DQB2	chr6_32420032_T_C_b38	rs2395163	2.2e-05	0.31	Artery - Aorta
PD	ENSG00000237541.3	HLA-DQA2	chr6_32420032_T_C_b38	rs2395163	2.7e-18	0.88	Artery - Coronary
PD	ENSG00000229391.7	HLA-DRB6	chr6_32420032_T_C_b38	rs2395163	3.4e-13	0.64	Artery - Coronary
PD	ENSG00000237541.3	HLA-DQA2	chr6_32420032_T_C_b38	rs2395163	3.2e-46	0.88	Artery - Tibial
PD	ENSG00000229391.7	HLA-DRB6	chr6_32420032_T_C_b38	rs2395163	5.1e-30	0.56	Artery - Tibial
PD	ENSG00000232629.8	HLA-DQB2	chr6_32420032_T_C_b38	rs2395163	7e-10	0.36	Artery - Tibial
PD	ENSG00000196126.11	HLA-DRB1	chr6_32420032_T_C_b38	rs2395163	2.2e-09	-0.18	Artery - Tibial
PD	ENSG00000196735.11	HLA-DQA1	chr6_32420032_T_C_b38	rs2395163	5.1e-07	-0.19	Artery - Tibial
PD	ENSG00000250535.1	STK19B	chr6_32420032_T_C_b38	rs2395163	1.4e-05	0.29	Artery - Tibial
PD	ENSG00000204338.8	CYP21A1P	chr6_32420032_T_C_b38	rs2395163	5.4e-05	0.24	Artery - Tibial
PD	ENSG00000237541.3	HLA-DQA2	chr6_32420032_T_C_b38	rs2395163	3.3e-11	0.88	Brain - Amygdala
PD	ENSG00000229391.7	HLA-DRB6	chr6_32420032_T_C_b38	rs2395163	3.5e-06	0.55	Brain - Amygdala
PD	ENSG00000196126.11	HLA-DRB1	chr6_32420032_T_C_b38	rs2395163	1.7e-05	-0.29	Brain - Amygdala
PD	ENSG00000237541.3	HLA-DQA2	chr6_32420032_T_C_b38	rs2395163	3.9e-09	0.77	Brain - Anterior cingulate cortex (BA24)
PD	ENSG00000196126.11	HLA-DRB1	chr6_32420032_T_C_b38	rs2395163	2.5e-08	-0.5	Brain - Anterior cingulate cortex (BA24)
PD	ENSG00000229391.7	HLA-DRB6	chr6_32420032_T_C_b38	rs2395163	2.4e-05	0.48	Brain - Anterior cingulate cortex (BA24)
PD	ENSG00000237541.3	HLA-DQA2	chr6_32420032_T_C_b38	rs2395163	3.1e-13	0.86	Brain - Caudate (basal ganglia)
PD	ENSG00000229391.7	HLA-DRB6	chr6_32420032_T_C_b38	rs2395163	5.6e-07	0.51	Brain - Caudate (basal ganglia)
PD	ENSG00000196126.11	HLA-DRB1	chr6_32420032_T_C_b38	rs2395163	4.8e-06	-0.31	Brain - Caudate (basal ganglia)
PD	ENSG00000237541.3	HLA-DQA2	chr6_32420032_T_C_b38	rs2395163	1.2e-08	0.74	Brain - Cerebellar Hemisphere
PD	ENSG00000229391.7	HLA-DRB6	chr6_32420032_T_C_b38	rs2395163	1.6e-07	0.61	Brain - Cerebellar Hemisphere
PD	ENSG00000196126.11	HLA-DRB1	chr6_32420032_T_C_b38	rs2395163	6.4e-06	-0.42	Brain - Cerebellar Hemisphere
PD	ENSG00000237541.3	HLA-DQA2	chr6_32420032_T_C_b38	rs2395163	5.6e-10	0.71	Brain - Cerebellum
PD	ENSG00000229391.7	HLA-DRB6	chr6_32420032_T_C_b38	rs2395163	1.4e-07	0.6	Brain - Cerebellum
PD	ENSG00000196126.11	HLA-DRB1	chr6_32420032_T_C_b38	rs2395163	2.3e-07	-0.47	Brain - Cerebellum
PD	ENSG00000237541.3	HLA-DQA2	chr6_32420032_T_C_b38	rs2395163	1.6e-10	0.74	Brain - Cortex
PD	ENSG00000196126.11	HLA-DRB1	chr6_32420032_T_C_b38	rs2395163	3.9e-08	-0.42	Brain - Cortex
PD	ENSG00000229391.7	HLA-DRB6	chr6_32420032_T_C_b38	rs2395163	6.3e-08	0.55	Brain - Cortex
PD	ENSG00000237541.3	HLA-DQA2	chr6_32420032_T_C_b38	rs2395163	3e-10	0.74	Brain - Frontal Cortex (BA9)
PD	ENSG00000229391.7	HLA-DRB6	chr6_32420032_T_C_b38	rs2395163	8.9e-07	0.44	Brain - Frontal Cortex (BA9)
PD	ENSG00000196126.11	HLA-DRB1	chr6_32420032_T_C_b38	rs2395163	6e-05	-0.32	Brain - Frontal Cortex (BA9)
PD	ENSG00000237541.3	HLA-DQA2	chr6_32420032_T_C_b38	rs2395163	4e-09	0.73	Brain - Hippocampus
PD	ENSG00000229391.7	HLA-DRB6	chr6_32420032_T_C_b38	rs2395163	1.4e-05	0.53	Brain - Hippocampus
PD	ENSG00000237541.3	HLA-DQA2	chr6_32420032_T_C_b38	rs2395163	5.1e-11	0.79	Brain - Hypothalamus
PD	ENSG00000229391.7	HLA-DRB6	chr6_32420032_T_C_b38	rs2395163	1.4e-07	0.61	Brain - Hypothalamus
PD	ENSG00000196126.11	HLA-DRB1	chr6_32420032_T_C_b38	rs2395163	2.6e-06	-0.3	Brain - Hypothalamus
PD	ENSG00000237541.3	HLA-DQA2	chr6_32420032_T_C_b38	rs2395163	3.6e-13	0.8	Brain - Nucleus accumbens (basal ganglia)
PD	ENSG00000229391.7	HLA-DRB6	chr6_32420032_T_C_b38	rs2395163	1.9e-07	0.55	Brain - Nucleus accumbens (basal ganglia)
PD	ENSG00000196126.11	HLA-DRB1	chr6_32420032_T_C_b38	rs2395163	1.5e-06	-0.37	Brain - Nucleus accumbens (basal ganglia)
PD	ENSG00000237541.3	HLA-DQA2	chr6_32420032_T_C_b38	rs2395163	4.6e-09	0.76	Brain - Putamen (basal ganglia)
PD	ENSG00000229391.7	HLA-DRB6	chr6_32420032_T_C_b38	rs2395163	2.8e-06	0.62	Brain - Putamen (basal ganglia)
PD	ENSG00000196126.11	HLA-DRB1	chr6_32420032_T_C_b38	rs2395163	2.8e-05	-0.4	Brain - Putamen (basal ganglia)
PD	ENSG00000237541.3	HLA-DQA2	chr6_32420032_T_C_b38	rs2395163	2.8e-07	0.78	Brain - Spinal cord (cervical c-1)
PD	ENSG00000229391.7	HLA-DRB6	chr6_32420032_T_C_b38	rs2395163	3.7e-06	0.58	Brain - Spinal cord (cervical c-1)
PD	ENSG00000237541.3	HLA-DQA2	chr6_32420032_T_C_b38	rs2395163	8.3e-08	0.87	Brain - Substantia nigra
PD	ENSG00000229391.7	HLA-DRB6	chr6_32420032_T_C_b38	rs2395163	2.5e-05	0.64	Brain - Substantia nigra
PD	ENSG00000237541.3	HLA-DQA2	chr6_32420032_T_C_b38	rs2395163	6.8e-27	0.96	Breast - Mammary Tissue
PD	ENSG00000229391.7	HLA-DRB6	chr6_32420032_T_C_b38	rs2395163	8.3e-20	0.71	Breast - Mammary Tissue
PD	ENSG00000232629.8	HLA-DQB2	chr6_32420032_T_C_b38	rs2395163	1.8e-06	0.44	Breast - Mammary Tissue
PD	ENSG00000204344.14	STK19	chr6_32420032_T_C_b38	rs2395163	1.4e-05	-0.22	Breast - Mammary Tissue
PD	ENSG00000179344.16	HLA-DQB1	chr6_32420032_T_C_b38	rs2395163	9.8e-05	-0.28	Breast - Mammary Tissue
PD	ENSG00000240053.8	LY6G5B	chr6_32420032_T_C_b38	rs2395163	0.00011	-0.14	Breast - Mammary Tissue
PD	ENSG00000228962.1	HCG23	chr6_32420032_T_C_b38	rs2395163	1.1e-06	0.36	Cells - Cultured fibroblasts
PD	ENSG00000240053.8	LY6G5B	chr6_32420032_T_C_b38	rs2395163	2.3e-05	-0.17	Cells - Cultured fibroblasts
PD	ENSG00000250535.1	STK19B	chr6_32420032_T_C_b38	rs2395163	3.3e-05	0.29	Cells - Cultured fibroblasts
PD	ENSG00000204304.11	PBX2	chr6_32420032_T_C_b38	rs2395163	0.0002	0.1	Cells - Cultured fibroblasts
PD	ENSG00000237541.3	HLA-DQA2	chr6_32420032_T_C_b38	rs2395163	2.4e-15	1.1	Cells - EBV-transformed lymphocytes
PD	ENSG00000196735.11	HLA-DQA1	chr6_32420032_T_C_b38	rs2395163	2.4e-11	-0.88	Cells - EBV-transformed lymphocytes
PD	ENSG00000232629.8	HLA-DQB2	chr6_32420032_T_C_b38	rs2395163	1.1e-07	0.78	Cells - EBV-transformed lymphocytes
PD	ENSG00000237541.3	HLA-DQA2	chr6_32420032_T_C_b38	rs2395163	4.3e-26	0.97	Colon - Sigmoid
PD	ENSG00000229391.7	HLA-DRB6	chr6_32420032_T_C_b38	rs2395163	6.4e-23	0.89	Colon - Sigmoid
PD	ENSG00000250535.1	STK19B	chr6_32420032_T_C_b38	rs2395163	6.1e-06	0.41	Colon - Sigmoid
PD	ENSG00000237541.3	HLA-DQA2	chr6_32420032_T_C_b38	rs2395163	5e-25	0.81	Colon - Transverse
PD	ENSG00000229391.7	HLA-DRB6	chr6_32420032_T_C_b38	rs2395163	5.1e-19	0.66	Colon - Transverse
PD	ENSG00000232629.8	HLA-DQB2	chr6_32420032_T_C_b38	rs2395163	4e-06	0.36	Colon - Transverse
PD	ENSG00000240053.8	LY6G5B	chr6_32420032_T_C_b38	rs2395163	1.1e-05	-0.17	Colon - Transverse
PD	ENSG00000196735.11	HLA-DQA1	chr6_32420032_T_C_b38	rs2395163	7.6e-05	-0.19	Colon - Transverse
PD	ENSG00000250535.1	STK19B	chr6_32420032_T_C_b38	rs2395163	0.00014	0.32	Colon - Transverse
PD	ENSG00000237541.3	HLA-DQA2	chr6_32420032_T_C_b38	rs2395163	7.9e-29	1.1	Esophagus - Gastroesophageal Junction
PD	ENSG00000229391.7	HLA-DRB6	chr6_32420032_T_C_b38	rs2395163	1.7e-19	0.79	Esophagus - Gastroesophageal Junction
PD	ENSG00000237541.3	HLA-DQA2	chr6_32420032_T_C_b38	rs2395163	1.4e-37	0.82	Esophagus - Mucosa
PD	ENSG00000229391.7	HLA-DRB6	chr6_32420032_T_C_b38	rs2395163	3.9e-25	0.65	Esophagus - Mucosa
PD	ENSG00000196735.11	HLA-DQA1	chr6_32420032_T_C_b38	rs2395163	1.1e-11	-0.32	Esophagus - Mucosa
PD	ENSG00000196126.11	HLA-DRB1	chr6_32420032_T_C_b38	rs2395163	4.3e-08	-0.21	Esophagus - Mucosa
PD	ENSG00000250535.1	STK19B	chr6_32420032_T_C_b38	rs2395163	7e-07	0.37	Esophagus - Mucosa
PD	ENSG00000204338.8	CYP21A1P	chr6_32420032_T_C_b38	rs2395163	1.4e-06	0.34	Esophagus - Mucosa
PD	ENSG00000232629.8	HLA-DQB2	chr6_32420032_T_C_b38	rs2395163	3e-06	0.23	Esophagus - Mucosa
PD	ENSG00000204344.14	STK19	chr6_32420032_T_C_b38	rs2395163	7.3e-06	-0.21	Esophagus - Mucosa
PD	ENSG00000240053.8	LY6G5B	chr6_32420032_T_C_b38	rs2395163	0.00013	-0.12	Esophagus - Mucosa
PD	ENSG00000179344.16	HLA-DQB1	chr6_32420032_T_C_b38	rs2395163	0.00021	-0.23	Esophagus - Mucosa
PD	ENSG00000237541.3	HLA-DQA2	chr6_32420032_T_C_b38	rs2395163	1.2e-42	0.99	Esophagus - Muscularis
PD	ENSG00000229391.7	HLA-DRB6	chr6_32420032_T_C_b38	rs2395163	7.7e-35	0.85	Esophagus - Muscularis
PD	ENSG00000250535.1	STK19B	chr6_32420032_T_C_b38	rs2395163	3.7e-09	0.4	Esophagus - Muscularis
PD	ENSG00000232629.8	HLA-DQB2	chr6_32420032_T_C_b38	rs2395163	6.4e-06	0.35	Esophagus - Muscularis
PD	ENSG00000204338.8	CYP21A1P	chr6_32420032_T_C_b38	rs2395163	1.6e-05	0.23	Esophagus - Muscularis
PD	ENSG00000240053.8	LY6G5B	chr6_32420032_T_C_b38	rs2395163	1.9e-05	-0.12	Esophagus - Muscularis
PD	ENSG00000204287.13	HLA-DRA	chr6_32420032_T_C_b38	rs2395163	0.00013	0.18	Esophagus - Muscularis
PD	ENSG00000196126.11	HLA-DRB1	chr6_32420032_T_C_b38	rs2395163	0.00013	0.18	Esophagus - Muscularis
PD	ENSG00000241106.6	HLA-DOB	chr6_32420032_T_C_b38	rs2395163	0.00018	0.27	Esophagus - Muscularis
PD	ENSG00000237541.3	HLA-DQA2	chr6_32420032_T_C_b38	rs2395163	7.3e-28	0.91	Heart - Atrial Appendage
PD	ENSG00000229391.7	HLA-DRB6	chr6_32420032_T_C_b38	rs2395163	2.1e-19	0.74	Heart - Atrial Appendage
PD	ENSG00000196126.11	HLA-DRB1	chr6_32420032_T_C_b38	rs2395163	5.9e-06	-0.31	Heart - Atrial Appendage
PD	ENSG00000237541.3	HLA-DQA2	chr6_32420032_T_C_b38	rs2395163	3.1e-29	0.91	Heart - Left Ventricle
PD	ENSG00000229391.7	HLA-DRB6	chr6_32420032_T_C_b38	rs2395163	1.9e-19	0.68	Heart - Left Ventricle
PD	ENSG00000250535.1	STK19B	chr6_32420032_T_C_b38	rs2395163	2.2e-06	0.36	Heart - Left Ventricle
PD	ENSG00000196126.11	HLA-DRB1	chr6_32420032_T_C_b38	rs2395163	3.1e-06	-0.22	Heart - Left Ventricle
PD	ENSG00000240053.8	LY6G5B	chr6_32420032_T_C_b38	rs2395163	2.7e-05	-0.12	Heart - Left Ventricle
PD	ENSG00000204428.12	LY6G5C	chr6_32420032_T_C_b38	rs2395163	0.00012	-0.25	Heart - Left Ventricle
PD	ENSG00000237541.3	HLA-DQA2	chr6_32420032_T_C_b38	rs2395163	2.4e-16	0.97	Liver
PD	ENSG00000229391.7	HLA-DRB6	chr6_32420032_T_C_b38	rs2395163	1.9e-11	0.79	Liver
PD	ENSG00000237541.3	HLA-DQA2	chr6_32420032_T_C_b38	rs2395163	2.7e-44	0.94	Lung
PD	ENSG00000229391.7	HLA-DRB6	chr6_32420032_T_C_b38	rs2395163	4.8e-31	0.75	Lung
PD	ENSG00000196126.11	HLA-DRB1	chr6_32420032_T_C_b38	rs2395163	1e-14	-0.29	Lung
PD	ENSG00000232629.8	HLA-DQB2	chr6_32420032_T_C_b38	rs2395163	3.6e-11	0.42	Lung
PD	ENSG00000196735.11	HLA-DQA1	chr6_32420032_T_C_b38	rs2395163	8.1e-08	-0.26	Lung
PD	ENSG00000240053.8	LY6G5B	chr6_32420032_T_C_b38	rs2395163	2e-06	-0.11	Lung
PD	ENSG00000196301.3	HLA-DRB9	chr6_32420032_T_C_b38	rs2395163	4.5e-06	0.3	Lung
PD	ENSG00000250535.1	STK19B	chr6_32420032_T_C_b38	rs2395163	4e-05	0.29	Lung
PD	ENSG00000237541.3	HLA-DQA2	chr6_32420032_T_C_b38	rs2395163	7.4e-07	0.75	Minor Salivary Gland
PD	ENSG00000237541.3	HLA-DQA2	chr6_32420032_T_C_b38	rs2395163	9.2e-57	0.94	Muscle - Skeletal
PD	ENSG00000229391.7	HLA-DRB6	chr6_32420032_T_C_b38	rs2395163	3.5e-40	0.76	Muscle - Skeletal
PD	ENSG00000196126.11	HLA-DRB1	chr6_32420032_T_C_b38	rs2395163	5.1e-11	-0.24	Muscle - Skeletal
PD	ENSG00000179344.16	HLA-DQB1	chr6_32420032_T_C_b38	rs2395163	1.7e-08	-0.31	Muscle - Skeletal
PD	ENSG00000223534.1	HLA-DQB1-AS1	chr6_32420032_T_C_b38	rs2395163	4.9e-06	-0.27	Muscle - Skeletal
PD	ENSG00000232629.8	HLA-DQB2	chr6_32420032_T_C_b38	rs2395163	2e-05	0.26	Muscle - Skeletal
PD	ENSG00000240053.8	LY6G5B	chr6_32420032_T_C_b38	rs2395163	0.00016	-0.095	Muscle - Skeletal
PD	ENSG00000204301.6	NOTCH4	chr6_32420032_T_C_b38	rs2395163	0.00026	0.14	Muscle - Skeletal
PD	ENSG00000237541.3	HLA-DQA2	chr6_32420032_T_C_b38	rs2395163	3.5e-47	0.99	Nerve - Tibial
PD	ENSG00000229391.7	HLA-DRB6	chr6_32420032_T_C_b38	rs2395163	6.6e-30	0.73	Nerve - Tibial
PD	ENSG00000232629.8	HLA-DQB2	chr6_32420032_T_C_b38	rs2395163	3.8e-11	0.46	Nerve - Tibial
PD	ENSG00000204338.8	CYP21A1P	chr6_32420032_T_C_b38	rs2395163	3.1e-07	0.34	Nerve - Tibial
PD	ENSG00000250535.1	STK19B	chr6_32420032_T_C_b38	rs2395163	8.1e-07	0.37	Nerve - Tibial
PD	ENSG00000231852.6	CYP21A2	chr6_32420032_T_C_b38	rs2395163	1.2e-06	0.3	Nerve - Tibial
PD	ENSG00000228962.1	HCG23	chr6_32420032_T_C_b38	rs2395163	1.2e-06	0.27	Nerve - Tibial
PD	ENSG00000196301.3	HLA-DRB9	chr6_32420032_T_C_b38	rs2395163	1.4e-06	0.32	Nerve - Tibial
PD	ENSG00000204344.14	STK19	chr6_32420032_T_C_b38	rs2395163	2.8e-06	-0.2	Nerve - Tibial
PD	ENSG00000196126.11	HLA-DRB1	chr6_32420032_T_C_b38	rs2395163	4.2e-06	-0.17	Nerve - Tibial
PD	ENSG00000240053.8	LY6G5B	chr6_32420032_T_C_b38	rs2395163	1.2e-05	-0.11	Nerve - Tibial
PD	ENSG00000204301.6	NOTCH4	chr6_32420032_T_C_b38	rs2395163	6.4e-05	0.17	Nerve - Tibial
PD	ENSG00000196735.11	HLA-DQA1	chr6_32420032_T_C_b38	rs2395163	0.00019	-0.18	Nerve - Tibial
PD	ENSG00000237541.3	HLA-DQA2	chr6_32420032_T_C_b38	rs2395163	3.2e-13	0.97	Ovary
PD	ENSG00000229391.7	HLA-DRB6	chr6_32420032_T_C_b38	rs2395163	1.1e-07	0.62	Ovary
PD	ENSG00000237541.3	HLA-DQA2	chr6_32420032_T_C_b38	rs2395163	2.6e-20	0.8	Pancreas
PD	ENSG00000229391.7	HLA-DRB6	chr6_32420032_T_C_b38	rs2395163	3.7e-12	0.56	Pancreas
PD	ENSG00000196126.11	HLA-DRB1	chr6_32420032_T_C_b38	rs2395163	5e-08	-0.29	Pancreas
PD	ENSG00000204344.14	STK19	chr6_32420032_T_C_b38	rs2395163	2.9e-05	-0.23	Pancreas
PD	ENSG00000232629.8	HLA-DQB2	chr6_32420032_T_C_b38	rs2395163	8.8e-05	0.34	Pancreas
PD	ENSG00000237541.3	HLA-DQA2	chr6_32420032_T_C_b38	rs2395163	2.2e-15	0.78	Pituitary
PD	ENSG00000229391.7	HLA-DRB6	chr6_32420032_T_C_b38	rs2395163	1.4e-11	0.59	Pituitary
PD	ENSG00000196126.11	HLA-DRB1	chr6_32420032_T_C_b38	rs2395163	2.1e-05	-0.25	Pituitary
PD	ENSG00000237541.3	HLA-DQA2	chr6_32420032_T_C_b38	rs2395163	8.6e-22	1	Prostate
PD	ENSG00000229391.7	HLA-DRB6	chr6_32420032_T_C_b38	rs2395163	4.4e-14	0.79	Prostate
PD	ENSG00000196126.11	HLA-DRB1	chr6_32420032_T_C_b38	rs2395163	3.3e-08	-0.37	Prostate
PD	ENSG00000237541.3	HLA-DQA2	chr6_32420032_T_C_b38	rs2395163	1.4e-36	0.71	Skin - Not Sun Exposed (Suprapubic)
PD	ENSG00000229391.7	HLA-DRB6	chr6_32420032_T_C_b38	rs2395163	1.2e-24	0.71	Skin - Not Sun Exposed (Suprapubic)
PD	ENSG00000196735.11	HLA-DQA1	chr6_32420032_T_C_b38	rs2395163	1.4e-17	-0.43	Skin - Not Sun Exposed (Suprapubic)
PD	ENSG00000196126.11	HLA-DRB1	chr6_32420032_T_C_b38	rs2395163	1e-14	-0.31	Skin - Not Sun Exposed (Suprapubic)
PD	ENSG00000204344.14	STK19	chr6_32420032_T_C_b38	rs2395163	8.2e-07	-0.18	Skin - Not Sun Exposed (Suprapubic)
PD	ENSG00000250535.1	STK19B	chr6_32420032_T_C_b38	rs2395163	1.9e-06	0.35	Skin - Not Sun Exposed (Suprapubic)
PD	ENSG00000232629.8	HLA-DQB2	chr6_32420032_T_C_b38	rs2395163	6.3e-05	0.16	Skin - Not Sun Exposed (Suprapubic)
PD	ENSG00000196301.3	HLA-DRB9	chr6_32420032_T_C_b38	rs2395163	7e-05	0.29	Skin - Not Sun Exposed (Suprapubic)
PD	ENSG00000204305.13	AGER	chr6_32420032_T_C_b38	rs2395163	0.00012	0.15	Skin - Not Sun Exposed (Suprapubic)
PD	ENSG00000204516.9	MICB	chr6_32420032_T_C_b38	rs2395163	0.0003	-0.22	Skin - Not Sun Exposed (Suprapubic)
PD	ENSG00000237541.3	HLA-DQA2	chr6_32420032_T_C_b38	rs2395163	5.2e-47	0.82	Skin - Sun Exposed (Lower leg)
PD	ENSG00000229391.7	HLA-DRB6	chr6_32420032_T_C_b38	rs2395163	2.5e-27	0.68	Skin - Sun Exposed (Lower leg)
PD	ENSG00000196735.11	HLA-DQA1	chr6_32420032_T_C_b38	rs2395163	9.7e-25	-0.5	Skin - Sun Exposed (Lower leg)
PD	ENSG00000196126.11	HLA-DRB1	chr6_32420032_T_C_b38	rs2395163	6.6e-21	-0.35	Skin - Sun Exposed (Lower leg)
PD	ENSG00000204344.14	STK19	chr6_32420032_T_C_b38	rs2395163	1.8e-06	-0.14	Skin - Sun Exposed (Lower leg)
PD	ENSG00000179344.16	HLA-DQB1	chr6_32420032_T_C_b38	rs2395163	1.9e-06	-0.3	Skin - Sun Exposed (Lower leg)
PD	ENSG00000250535.1	STK19B	chr6_32420032_T_C_b38	rs2395163	6.1e-06	0.31	Skin - Sun Exposed (Lower leg)
PD	ENSG00000240053.8	LY6G5B	chr6_32420032_T_C_b38	rs2395163	4.2e-05	-0.086	Skin - Sun Exposed (Lower leg)
PD	ENSG00000241106.6	HLA-DOB	chr6_32420032_T_C_b38	rs2395163	5.3e-05	0.27	Skin - Sun Exposed (Lower leg)
PD	ENSG00000204305.13	AGER	chr6_32420032_T_C_b38	rs2395163	0.0001	0.15	Skin - Sun Exposed (Lower leg)
PD	ENSG00000204338.8	CYP21A1P	chr6_32420032_T_C_b38	rs2395163	0.00026	0.23	Skin - Sun Exposed (Lower leg)
PD	ENSG00000237541.3	HLA-DQA2	chr6_32420032_T_C_b38	rs2395163	2.4e-13	0.87	Small Intestine - Terminal Ileum
PD	ENSG00000229391.7	HLA-DRB6	chr6_32420032_T_C_b38	rs2395163	1.9e-07	0.6	Small Intestine - Terminal Ileum
PD	ENSG00000232629.8	HLA-DQB2	chr6_32420032_T_C_b38	rs2395163	3.7e-05	0.41	Small Intestine - Terminal Ileum
PD	ENSG00000237541.3	HLA-DQA2	chr6_32420032_T_C_b38	rs2395163	4.2e-19	0.92	Spleen
PD	ENSG00000229391.7	HLA-DRB6	chr6_32420032_T_C_b38	rs2395163	7.7e-11	0.7	Spleen
PD	ENSG00000196126.11	HLA-DRB1	chr6_32420032_T_C_b38	rs2395163	8.7e-07	-0.29	Spleen
PD	ENSG00000196735.11	HLA-DQA1	chr6_32420032_T_C_b38	rs2395163	2.2e-06	-0.31	Spleen
PD	ENSG00000244731.7	C4A	chr6_32420032_T_C_b38	rs2395163	0.00012	0.44	Spleen
PD	ENSG00000237541.3	HLA-DQA2	chr6_32420032_T_C_b38	rs2395163	2.4e-28	0.9	Stomach
PD	ENSG00000229391.7	HLA-DRB6	chr6_32420032_T_C_b38	rs2395163	1.2e-14	0.54	Stomach
PD	ENSG00000232629.8	HLA-DQB2	chr6_32420032_T_C_b38	rs2395163	2.2e-07	0.43	Stomach
PD	ENSG00000179344.16	HLA-DQB1	chr6_32420032_T_C_b38	rs2395163	5.5e-05	-0.35	Stomach
PD	ENSG00000237541.3	HLA-DQA2	chr6_32420032_T_C_b38	rs2395163	2.1e-21	0.83	Testis
PD	ENSG00000229391.7	HLA-DRB6	chr6_32420032_T_C_b38	rs2395163	8.2e-12	0.52	Testis
PD	ENSG00000232629.8	HLA-DQB2	chr6_32420032_T_C_b38	rs2395163	2.1e-08	0.51	Testis
PD	ENSG00000196126.11	HLA-DRB1	chr6_32420032_T_C_b38	rs2395163	3.7e-08	-0.39	Testis
PD	ENSG00000237285.1	HNRNPA1P2	chr6_32420032_T_C_b38	rs2395163	4.5e-07	0.35	Testis
PD	ENSG00000204296.11	C6orf10	chr6_32420032_T_C_b38	rs2395163	1.4e-06	0.11	Testis
PD	ENSG00000250535.1	STK19B	chr6_32420032_T_C_b38	rs2395163	1.7e-06	0.46	Testis
PD	ENSG00000204338.8	CYP21A1P	chr6_32420032_T_C_b38	rs2395163	5.2e-05	0.33	Testis
PD	ENSG00000196735.11	HLA-DQA1	chr6_32420032_T_C_b38	rs2395163	0.00016	-0.25	Testis
PD	ENSG00000237541.3	HLA-DQA2	chr6_32420032_T_C_b38	rs2395163	1.6e-45	0.89	Thyroid
PD	ENSG00000229391.7	HLA-DRB6	chr6_32420032_T_C_b38	rs2395163	2.2e-35	0.74	Thyroid
PD	ENSG00000196126.11	HLA-DRB1	chr6_32420032_T_C_b38	rs2395163	1.6e-14	-0.31	Thyroid
PD	ENSG00000232629.8	HLA-DQB2	chr6_32420032_T_C_b38	rs2395163	2.2e-08	0.34	Thyroid
PD	ENSG00000250535.1	STK19B	chr6_32420032_T_C_b38	rs2395163	1e-07	0.32	Thyroid
PD	ENSG00000196301.3	HLA-DRB9	chr6_32420032_T_C_b38	rs2395163	1.1e-07	0.35	Thyroid
PD	ENSG00000204344.14	STK19	chr6_32420032_T_C_b38	rs2395163	2.4e-07	-0.21	Thyroid
PD	ENSG00000196735.11	HLA-DQA1	chr6_32420032_T_C_b38	rs2395163	1.1e-06	-0.22	Thyroid
PD	ENSG00000179344.16	HLA-DQB1	chr6_32420032_T_C_b38	rs2395163	3.9e-06	-0.27	Thyroid
PD	ENSG00000244731.7	C4A	chr6_32420032_T_C_b38	rs2395163	3.5e-05	0.2	Thyroid
PD	ENSG00000240053.8	LY6G5B	chr6_32420032_T_C_b38	rs2395163	4.5e-05	-0.11	Thyroid
PD	ENSG00000204338.8	CYP21A1P	chr6_32420032_T_C_b38	rs2395163	5.9e-05	0.2	Thyroid
PD	ENSG00000204301.6	NOTCH4	chr6_32420032_T_C_b38	rs2395163	0.00016	0.15	Thyroid
PD	ENSG00000204516.9	MICB	chr6_32420032_T_C_b38	rs2395163	0.00026	-0.16	Thyroid
PD	ENSG00000237541.3	HLA-DQA2	chr6_32420032_T_C_b38	rs2395163	2.1e-12	1	Uterus
PD	ENSG00000229391.7	HLA-DRB6	chr6_32420032_T_C_b38	rs2395163	1.3e-10	0.81	Uterus
PD	ENSG00000237541.3	HLA-DQA2	chr6_32420032_T_C_b38	rs2395163	2.8e-10	0.85	Vagina
PD	ENSG00000229391.7	HLA-DRB6	chr6_32420032_T_C_b38	rs2395163	1.4e-07	0.67	Vagina
PD	ENSG00000237541.3	HLA-DQA2	chr6_32420032_T_C_b38	rs2395163	4.8e-58	0.9	Whole Blood
PD	ENSG00000229391.7	HLA-DRB6	chr6_32420032_T_C_b38	rs2395163	4.8e-22	0.5	Whole Blood
PD	ENSG00000196126.11	HLA-DRB1	chr6_32420032_T_C_b38	rs2395163	1.3e-18	-0.19	Whole Blood
PD	ENSG00000232629.8	HLA-DQB2	chr6_32420032_T_C_b38	rs2395163	1.2e-17	0.46	Whole Blood
PD	ENSG00000179344.16	HLA-DQB1	chr6_32420032_T_C_b38	rs2395163	6.8e-09	-0.25	Whole Blood
PD	ENSG00000250535.1	STK19B	chr6_32420032_T_C_b38	rs2395163	7.7e-09	0.35	Whole Blood
PD	ENSG00000204338.8	CYP21A1P	chr6_32420032_T_C_b38	rs2395163	6.9e-08	0.29	Whole Blood
PD	ENSG00000240053.8	LY6G5B	chr6_32420032_T_C_b38	rs2395163	1.3e-07	-0.11	Whole Blood
PD	ENSG00000196301.3	HLA-DRB9	chr6_32420032_T_C_b38	rs2395163	2.5e-07	0.27	Whole Blood
PD	ENSG00000196735.11	HLA-DQA1	chr6_32420032_T_C_b38	rs2395163	5e-07	-0.14	Whole Blood
PD	ENSG00000229391.7	HLA-DRB6	chr6_32441753_G_A_b38	rs3129882	2.5e-26	0.56	Adipose - Subcutaneous
PD	ENSG00000237541.3	HLA-DQA2	chr6_32441753_G_A_b38	rs3129882	1.3e-08	0.33	Adipose - Subcutaneous
PD	ENSG00000198502.5	HLA-DRB5	chr6_32441753_G_A_b38	rs3129882	2.2e-08	-0.28	Adipose - Subcutaneous
PD	ENSG00000204287.13	HLA-DRA	chr6_32441753_G_A_b38	rs3129882	6.1e-07	0.17	Adipose - Subcutaneous
PD	ENSG00000228962.1	HCG23	chr6_32441753_G_A_b38	rs3129882	1.2e-06	0.21	Adipose - Subcutaneous
PD	ENSG00000223534.1	HLA-DQB1-AS1	chr6_32441753_G_A_b38	rs3129882	2.7e-05	-0.18	Adipose - Subcutaneous
PD	ENSG00000244731.7	C4A	chr6_32441753_G_A_b38	rs3129882	6.5e-05	-0.17	Adipose - Subcutaneous
PD	ENSG00000229391.7	HLA-DRB6	chr6_32441753_G_A_b38	rs3129882	4.9e-19	0.51	Adipose - Visceral (Omentum)
PD	ENSG00000198502.5	HLA-DRB5	chr6_32441753_G_A_b38	rs3129882	7.7e-09	-0.33	Adipose - Visceral (Omentum)
PD	ENSG00000228962.1	HCG23	chr6_32441753_G_A_b38	rs3129882	2.9e-07	0.2	Adipose - Visceral (Omentum)
PD	ENSG00000204287.13	HLA-DRA	chr6_32441753_G_A_b38	rs3129882	4.3e-05	0.15	Adipose - Visceral (Omentum)
PD	ENSG00000204305.13	AGER	chr6_32441753_G_A_b38	rs3129882	0.00011	0.13	Adipose - Visceral (Omentum)
PD	ENSG00000237541.3	HLA-DQA2	chr6_32441753_G_A_b38	rs3129882	0.00012	0.25	Adipose - Visceral (Omentum)
PD	ENSG00000229391.7	HLA-DRB6	chr6_32441753_G_A_b38	rs3129882	9.1e-13	0.64	Adrenal Gland
PD	ENSG00000237541.3	HLA-DQA2	chr6_32441753_G_A_b38	rs3129882	7.3e-06	0.42	Adrenal Gland
PD	ENSG00000229391.7	HLA-DRB6	chr6_32441753_G_A_b38	rs3129882	3.8e-23	0.51	Artery - Aorta
PD	ENSG00000237541.3	HLA-DQA2	chr6_32441753_G_A_b38	rs3129882	1.5e-07	0.34	Artery - Aorta
PD	ENSG00000198502.5	HLA-DRB5	chr6_32441753_G_A_b38	rs3129882	4.3e-07	-0.31	Artery - Aorta
PD	ENSG00000229391.7	HLA-DRB6	chr6_32441753_G_A_b38	rs3129882	5.5e-11	0.45	Artery - Coronary
PD	ENSG00000223534.1	HLA-DQB1-AS1	chr6_32441753_G_A_b38	rs3129882	2.8e-05	-0.22	Artery - Coronary
PD	ENSG00000229391.7	HLA-DRB6	chr6_32441753_G_A_b38	rs3129882	5.1e-28	0.42	Artery - Tibial
PD	ENSG00000198502.5	HLA-DRB5	chr6_32441753_G_A_b38	rs3129882	4.9e-08	-0.25	Artery - Tibial
PD	ENSG00000237541.3	HLA-DQA2	chr6_32441753_G_A_b38	rs3129882	1.4e-05	0.22	Artery - Tibial
PD	ENSG00000229391.7	HLA-DRB6	chr6_32441753_G_A_b38	rs3129882	3e-05	0.39	Brain - Amygdala
PD	ENSG00000229391.7	HLA-DRB6	chr6_32441753_G_A_b38	rs3129882	3e-07	0.44	Brain - Anterior cingulate cortex (BA24)
PD	ENSG00000198502.5	HLA-DRB5	chr6_32441753_G_A_b38	rs3129882	1.6e-06	-0.45	Brain - Anterior cingulate cortex (BA24)
PD	ENSG00000229391.7	HLA-DRB6	chr6_32441753_G_A_b38	rs3129882	1.5e-06	0.41	Brain - Caudate (basal ganglia)
PD	ENSG00000229391.7	HLA-DRB6	chr6_32441753_G_A_b38	rs3129882	4.3e-08	0.51	Brain - Cerebellar Hemisphere
PD	ENSG00000244731.7	C4A	chr6_32441753_G_A_b38	rs3129882	3.3e-05	-0.39	Brain - Cerebellar Hemisphere
PD	ENSG00000229391.7	HLA-DRB6	chr6_32441753_G_A_b38	rs3129882	1.1e-05	0.39	Brain - Cerebellum
PD	ENSG00000229391.7	HLA-DRB6	chr6_32441753_G_A_b38	rs3129882	2.8e-08	0.46	Brain - Cortex
PD	ENSG00000198502.5	HLA-DRB5	chr6_32441753_G_A_b38	rs3129882	2.5e-06	-0.41	Brain - Cortex
PD	ENSG00000229391.7	HLA-DRB6	chr6_32441753_G_A_b38	rs3129882	1.6e-07	0.41	Brain - Frontal Cortex (BA9)
PD	ENSG00000179344.16	HLA-DQB1	chr6_32441753_G_A_b38	rs3129882	1.7e-05	-0.43	Brain - Frontal Cortex (BA9)
PD	ENSG00000229391.7	HLA-DRB6	chr6_32441753_G_A_b38	rs3129882	3.9e-10	0.57	Brain - Hypothalamus
PD	ENSG00000198502.5	HLA-DRB5	chr6_32441753_G_A_b38	rs3129882	4.7e-08	-0.48	Brain - Hypothalamus
PD	ENSG00000229391.7	HLA-DRB6	chr6_32441753_G_A_b38	rs3129882	3.6e-07	0.42	Brain - Nucleus accumbens (basal ganglia)
PD	ENSG00000198502.5	HLA-DRB5	chr6_32441753_G_A_b38	rs3129882	4.8e-05	-0.37	Brain - Nucleus accumbens (basal ganglia)
PD	ENSG00000229391.7	HLA-DRB6	chr6_32441753_G_A_b38	rs3129882	4.6e-06	0.44	Brain - Putamen (basal ganglia)
PD	ENSG00000198502.5	HLA-DRB5	chr6_32441753_G_A_b38	rs3129882	6.1e-06	-0.48	Brain - Putamen (basal ganglia)
PD	ENSG00000229391.7	HLA-DRB6	chr6_32441753_G_A_b38	rs3129882	2.7e-07	0.45	Brain - Spinal cord (cervical c-1)
PD	ENSG00000229391.7	HLA-DRB6	chr6_32441753_G_A_b38	rs3129882	1.7e-15	0.47	Breast - Mammary Tissue
PD	ENSG00000231852.6	CYP21A2	chr6_32441753_G_A_b38	rs3129882	2.8e-05	0.18	Breast - Mammary Tissue
PD	ENSG00000198502.5	HLA-DRB5	chr6_32441753_G_A_b38	rs3129882	4e-05	-0.24	Breast - Mammary Tissue
PD	ENSG00000204287.13	HLA-DRA	chr6_32441753_G_A_b38	rs3129882	8.8e-05	0.14	Breast - Mammary Tissue
PD	ENSG00000228962.1	HCG23	chr6_32441753_G_A_b38	rs3129882	8.5e-09	0.33	Cells - Cultured fibroblasts
PD	ENSG00000225914.1	XXbac-BPG154L12.4	chr6_32441753_G_A_b38	rs3129882	7.9e-06	0.25	Cells - Cultured fibroblasts
PD	ENSG00000244731.7	C4A	chr6_32441753_G_A_b38	rs3129882	7.6e-05	-0.13	Cells - Cultured fibroblasts
PD	ENSG00000240053.8	LY6G5B	chr6_32441753_G_A_b38	rs3129882	0.00013	-0.12	Cells - Cultured fibroblasts
PD	ENSG00000223534.1	HLA-DQB1-AS1	chr6_32441753_G_A_b38	rs3129882	1.4e-07	-0.48	Cells - EBV-transformed lymphocytes
PD	ENSG00000198502.5	HLA-DRB5	chr6_32441753_G_A_b38	rs3129882	1.7e-07	-0.53	Cells - EBV-transformed lymphocytes
PD	ENSG00000229391.7	HLA-DRB6	chr6_32441753_G_A_b38	rs3129882	1.3e-14	0.53	Colon - Sigmoid
PD	ENSG00000228962.1	HCG23	chr6_32441753_G_A_b38	rs3129882	4.1e-06	0.26	Colon - Sigmoid
PD	ENSG00000198502.5	HLA-DRB5	chr6_32441753_G_A_b38	rs3129882	1.4e-05	-0.31	Colon - Sigmoid
PD	ENSG00000229391.7	HLA-DRB6	chr6_32441753_G_A_b38	rs3129882	3.7e-16	0.47	Colon - Transverse
PD	ENSG00000240053.8	LY6G5B	chr6_32441753_G_A_b38	rs3129882	4.5e-06	-0.13	Colon - Transverse
PD	ENSG00000229391.7	HLA-DRB6	chr6_32441753_G_A_b38	rs3129882	1.7e-15	0.53	Esophagus - Gastroesophageal Junction
PD	ENSG00000228962.1	HCG23	chr6_32441753_G_A_b38	rs3129882	8.3e-06	0.26	Esophagus - Gastroesophageal Junction
PD	ENSG00000237541.3	HLA-DQA2	chr6_32441753_G_A_b38	rs3129882	2.2e-05	0.33	Esophagus - Gastroesophageal Junction
PD	ENSG00000204287.13	HLA-DRA	chr6_32441753_G_A_b38	rs3129882	4e-05	0.18	Esophagus - Gastroesophageal Junction
PD	ENSG00000229391.7	HLA-DRB6	chr6_32441753_G_A_b38	rs3129882	3.7e-19	0.45	Esophagus - Mucosa
PD	ENSG00000198502.5	HLA-DRB5	chr6_32441753_G_A_b38	rs3129882	1.3e-08	-0.29	Esophagus - Mucosa
PD	ENSG00000223534.1	HLA-DQB1-AS1	chr6_32441753_G_A_b38	rs3129882	2.5e-05	-0.18	Esophagus - Mucosa
PD	ENSG00000237541.3	HLA-DQA2	chr6_32441753_G_A_b38	rs3129882	3.2e-05	0.23	Esophagus - Mucosa
PD	ENSG00000240053.8	LY6G5B	chr6_32441753_G_A_b38	rs3129882	3.9e-05	-0.1	Esophagus - Mucosa
PD	ENSG00000224389.8	C4B	chr6_32441753_G_A_b38	rs3129882	0.00019	0.16	Esophagus - Mucosa
PD	ENSG00000229391.7	HLA-DRB6	chr6_32441753_G_A_b38	rs3129882	1.4e-20	0.53	Esophagus - Muscularis
PD	ENSG00000237541.3	HLA-DQA2	chr6_32441753_G_A_b38	rs3129882	1.8e-06	0.3	Esophagus - Muscularis
PD	ENSG00000240053.8	LY6G5B	chr6_32441753_G_A_b38	rs3129882	5.2e-06	-0.1	Esophagus - Muscularis
PD	ENSG00000204305.13	AGER	chr6_32441753_G_A_b38	rs3129882	5.2e-06	0.099	Esophagus - Muscularis
PD	ENSG00000198502.5	HLA-DRB5	chr6_32441753_G_A_b38	rs3129882	2.2e-05	-0.26	Esophagus - Muscularis
PD	ENSG00000204287.13	HLA-DRA	chr6_32441753_G_A_b38	rs3129882	0.00014	0.14	Esophagus - Muscularis
PD	ENSG00000204428.12	LY6G5C	chr6_32441753_G_A_b38	rs3129882	0.00018	-0.17	Esophagus - Muscularis
PD	ENSG00000229391.7	HLA-DRB6	chr6_32441753_G_A_b38	rs3129882	7.8e-13	0.47	Heart - Atrial Appendage
PD	ENSG00000198502.5	HLA-DRB5	chr6_32441753_G_A_b38	rs3129882	2.8e-05	-0.3	Heart - Atrial Appendage
PD	ENSG00000228962.1	HCG23	chr6_32441753_G_A_b38	rs3129882	0.00011	0.2	Heart - Atrial Appendage
PD	ENSG00000229391.7	HLA-DRB6	chr6_32441753_G_A_b38	rs3129882	2.4e-13	0.44	Heart - Left Ventricle
PD	ENSG00000198502.5	HLA-DRB5	chr6_32441753_G_A_b38	rs3129882	2.5e-11	-0.43	Heart - Left Ventricle
PD	ENSG00000204305.13	AGER	chr6_32441753_G_A_b38	rs3129882	1.6e-05	0.11	Heart - Left Ventricle
PD	ENSG00000237541.3	HLA-DQA2	chr6_32441753_G_A_b38	rs3129882	2e-05	0.29	Heart - Left Ventricle
PD	ENSG00000229391.7	HLA-DRB6	chr6_32441753_G_A_b38	rs3129882	3.1e-07	0.47	Liver
PD	ENSG00000229391.7	HLA-DRB6	chr6_32441753_G_A_b38	rs3129882	7.6e-26	0.53	Lung
PD	ENSG00000198502.5	HLA-DRB5	chr6_32441753_G_A_b38	rs3129882	1.1e-13	-0.37	Lung
PD	ENSG00000228962.1	HCG23	chr6_32441753_G_A_b38	rs3129882	1.6e-08	0.27	Lung
PD	ENSG00000237541.3	HLA-DQA2	chr6_32441753_G_A_b38	rs3129882	4e-08	0.31	Lung
PD	ENSG00000204428.12	LY6G5C	chr6_32441753_G_A_b38	rs3129882	3.6e-06	-0.17	Lung
PD	ENSG00000223534.1	HLA-DQB1-AS1	chr6_32441753_G_A_b38	rs3129882	4.7e-05	-0.15	Lung
PD	ENSG00000204516.9	MICB	chr6_32441753_G_A_b38	rs3129882	0.00018	0.13	Lung
PD	ENSG00000229391.7	HLA-DRB6	chr6_32441753_G_A_b38	rs3129882	1.9e-07	0.56	Minor Salivary Gland
PD	ENSG00000229391.7	HLA-DRB6	chr6_32441753_G_A_b38	rs3129882	1.5e-30	0.53	Muscle - Skeletal
PD	ENSG00000198502.5	HLA-DRB5	chr6_32441753_G_A_b38	rs3129882	2.1e-12	-0.32	Muscle - Skeletal
PD	ENSG00000237541.3	HLA-DQA2	chr6_32441753_G_A_b38	rs3129882	3.4e-09	0.3	Muscle - Skeletal
PD	ENSG00000204287.13	HLA-DRA	chr6_32441753_G_A_b38	rs3129882	4.2e-08	0.17	Muscle - Skeletal
PD	ENSG00000244731.7	C4A	chr6_32441753_G_A_b38	rs3129882	3.8e-05	-0.15	Muscle - Skeletal
PD	ENSG00000240053.8	LY6G5B	chr6_32441753_G_A_b38	rs3129882	6.1e-05	-0.079	Muscle - Skeletal
PD	ENSG00000229391.7	HLA-DRB6	chr6_32441753_G_A_b38	rs3129882	6.8e-21	0.48	Nerve - Tibial
PD	ENSG00000228962.1	HCG23	chr6_32441753_G_A_b38	rs3129882	1.1e-11	0.29	Nerve - Tibial
PD	ENSG00000204290.10	BTNL2	chr6_32441753_G_A_b38	rs3129882	3.8e-09	-0.29	Nerve - Tibial
PD	ENSG00000223534.1	HLA-DQB1-AS1	chr6_32441753_G_A_b38	rs3129882	1.5e-08	-0.23	Nerve - Tibial
PD	ENSG00000237541.3	HLA-DQA2	chr6_32441753_G_A_b38	rs3129882	2.1e-08	0.33	Nerve - Tibial
PD	ENSG00000198502.5	HLA-DRB5	chr6_32441753_G_A_b38	rs3129882	2.4e-07	-0.28	Nerve - Tibial
PD	ENSG00000231852.6	CYP21A2	chr6_32441753_G_A_b38	rs3129882	9.3e-07	0.24	Nerve - Tibial
PD	ENSG00000204305.13	AGER	chr6_32441753_G_A_b38	rs3129882	0.00014	0.13	Nerve - Tibial
PD	ENSG00000229391.7	HLA-DRB6	chr6_32441753_G_A_b38	rs3129882	1.8e-07	0.44	Ovary
PD	ENSG00000198502.5	HLA-DRB5	chr6_32441753_G_A_b38	rs3129882	5.9e-06	-0.4	Ovary
PD	ENSG00000229391.7	HLA-DRB6	chr6_32441753_G_A_b38	rs3129882	8.5e-12	0.43	Pancreas
PD	ENSG00000223534.1	HLA-DQB1-AS1	chr6_32441753_G_A_b38	rs3129882	4e-05	-0.25	Pancreas
PD	ENSG00000198502.5	HLA-DRB5	chr6_32441753_G_A_b38	rs3129882	4.9e-05	-0.27	Pancreas
PD	ENSG00000229391.7	HLA-DRB6	chr6_32441753_G_A_b38	rs3129882	4.6e-10	0.43	Pituitary
PD	ENSG00000198502.5	HLA-DRB5	chr6_32441753_G_A_b38	rs3129882	4e-07	-0.39	Pituitary
PD	ENSG00000229391.7	HLA-DRB6	chr6_32441753_G_A_b38	rs3129882	2.2e-11	0.56	Prostate
PD	ENSG00000229391.7	HLA-DRB6	chr6_32441753_G_A_b38	rs3129882	4.1e-26	0.57	Skin - Not Sun Exposed (Suprapubic)
PD	ENSG00000196301.3	HLA-DRB9	chr6_32441753_G_A_b38	rs3129882	3.5e-08	0.31	Skin - Not Sun Exposed (Suprapubic)
PD	ENSG00000198502.5	HLA-DRB5	chr6_32441753_G_A_b38	rs3129882	5.5e-07	-0.26	Skin - Not Sun Exposed (Suprapubic)
PD	ENSG00000237541.3	HLA-DQA2	chr6_32441753_G_A_b38	rs3129882	4.9e-05	0.19	Skin - Not Sun Exposed (Suprapubic)
PD	ENSG00000196735.11	HLA-DQA1	chr6_32441753_G_A_b38	rs3129882	0.00018	-0.15	Skin - Not Sun Exposed (Suprapubic)
PD	ENSG00000229391.7	HLA-DRB6	chr6_32441753_G_A_b38	rs3129882	2.8e-27	0.54	Skin - Sun Exposed (Lower leg)
PD	ENSG00000198502.5	HLA-DRB5	chr6_32441753_G_A_b38	rs3129882	7.5e-07	-0.26	Skin - Sun Exposed (Lower leg)
PD	ENSG00000196735.11	HLA-DQA1	chr6_32441753_G_A_b38	rs3129882	4.8e-06	-0.19	Skin - Sun Exposed (Lower leg)
PD	ENSG00000223534.1	HLA-DQB1-AS1	chr6_32441753_G_A_b38	rs3129882	5.7e-06	-0.2	Skin - Sun Exposed (Lower leg)
PD	ENSG00000237541.3	HLA-DQA2	chr6_32441753_G_A_b38	rs3129882	1.1e-05	0.22	Skin - Sun Exposed (Lower leg)
PD	ENSG00000228962.1	HCG23	chr6_32441753_G_A_b38	rs3129882	0.00019	0.19	Skin - Sun Exposed (Lower leg)
PD	ENSG00000244731.7	C4A	chr6_32441753_G_A_b38	rs3129882	0.00034	-0.17	Skin - Sun Exposed (Lower leg)
PD	ENSG00000229391.7	HLA-DRB6	chr6_32441753_G_A_b38	rs3129882	2.6e-08	0.46	Small Intestine - Terminal Ileum
PD	ENSG00000198502.5	HLA-DRB5	chr6_32441753_G_A_b38	rs3129882	6.1e-06	-0.38	Small Intestine - Terminal Ileum
PD	ENSG00000229391.7	HLA-DRB6	chr6_32441753_G_A_b38	rs3129882	2.5e-08	0.46	Spleen
PD	ENSG00000229391.7	HLA-DRB6	chr6_32441753_G_A_b38	rs3129882	6.1e-11	0.35	Stomach
PD	ENSG00000198502.5	HLA-DRB5	chr6_32441753_G_A_b38	rs3129882	7.3e-08	-0.33	Stomach
PD	ENSG00000223534.1	HLA-DQB1-AS1	chr6_32441753_G_A_b38	rs3129882	1.2e-06	-0.29	Stomach
PD	ENSG00000229391.7	HLA-DRB6	chr6_32441753_G_A_b38	rs3129882	3.2e-08	0.35	Testis
PD	ENSG00000196126.11	HLA-DRB1	chr6_32441753_G_A_b38	rs3129882	4.8e-08	-0.32	Testis
PD	ENSG00000198502.5	HLA-DRB5	chr6_32441753_G_A_b38	rs3129882	3e-07	-0.39	Testis
PD	ENSG00000229391.7	HLA-DRB6	chr6_32441753_G_A_b38	rs3129882	1.6e-27	0.51	Thyroid
PD	ENSG00000198502.5	HLA-DRB5	chr6_32441753_G_A_b38	rs3129882	3.2e-13	-0.37	Thyroid
PD	ENSG00000237541.3	HLA-DQA2	chr6_32441753_G_A_b38	rs3129882	7.7e-06	0.23	Thyroid
PD	ENSG00000196126.11	HLA-DRB1	chr6_32441753_G_A_b38	rs3129882	6.3e-05	-0.12	Thyroid
PD	ENSG00000228962.1	HCG23	chr6_32441753_G_A_b38	rs3129882	6.6e-05	0.18	Thyroid
PD	ENSG00000204428.12	LY6G5C	chr6_32441753_G_A_b38	rs3129882	7.4e-05	-0.17	Thyroid
PD	ENSG00000204308.7	RNF5	chr6_32441753_G_A_b38	rs3129882	8.2e-05	-0.098	Thyroid
PD	ENSG00000229391.7	HLA-DRB6	chr6_32441753_G_A_b38	rs3129882	5.1e-06	0.44	Uterus
PD	ENSG00000229391.7	HLA-DRB6	chr6_32441753_G_A_b38	rs3129882	1.9e-10	0.58	Vagina
PD	ENSG00000229391.7	HLA-DRB6	chr6_32441753_G_A_b38	rs3129882	1.4e-30	0.46	Whole Blood
PD	ENSG00000198502.5	HLA-DRB5	chr6_32441753_G_A_b38	rs3129882	1.8e-14	-0.26	Whole Blood
PD	ENSG00000196301.3	HLA-DRB9	chr6_32441753_G_A_b38	rs3129882	2.3e-08	0.23	Whole Blood
PD	ENSG00000237541.3	HLA-DQA2	chr6_32441753_G_A_b38	rs3129882	3e-07	0.25	Whole Blood
PD	ENSG00000244731.7	C4A	chr6_32441753_G_A_b38	rs3129882	1.1e-06	-0.22	Whole Blood
PD	ENSG00000223534.1	HLA-DQB1-AS1	chr6_32441753_G_A_b38	rs3129882	2.6e-05	-0.12	Whole Blood
PD	ENSG00000240053.8	LY6G5B	chr6_32441753_G_A_b38	rs3129882	3.1e-05	-0.07	Whole Blood
PD	ENSG00000241106.6	HLA-DOB	chr6_32441753_G_A_b38	rs3129882	4.4e-05	0.11	Whole Blood
PD	ENSG00000224389.8	C4B	chr6_32441753_G_A_b38	rs3129882	4.8e-05	0.2	Whole Blood
PD	ENSG00000237541.3	HLA-DQA2	chr6_32604184_T_C_b38	rs17425622	4.6e-62	1.3	Adipose - Subcutaneous
PD	ENSG00000229391.7	HLA-DRB6	chr6_32604184_T_C_b38	rs17425622	1.6e-30	0.87	Adipose - Subcutaneous
PD	ENSG00000179344.16	HLA-DQB1	chr6_32604184_T_C_b38	rs17425622	1.2e-13	-0.51	Adipose - Subcutaneous
PD	ENSG00000196735.11	HLA-DQA1	chr6_32604184_T_C_b38	rs17425622	4.1e-13	-0.39	Adipose - Subcutaneous
PD	ENSG00000196126.11	HLA-DRB1	chr6_32604184_T_C_b38	rs17425622	4e-09	-0.28	Adipose - Subcutaneous
PD	ENSG00000241106.6	HLA-DOB	chr6_32604184_T_C_b38	rs17425622	1.2e-08	0.38	Adipose - Subcutaneous
PD	ENSG00000225914.1	XXbac-BPG154L12.4	chr6_32604184_T_C_b38	rs17425622	2.2e-07	0.39	Adipose - Subcutaneous
PD	ENSG00000204314.10	PRRT1	chr6_32604184_T_C_b38	rs17425622	4.7e-06	0.16	Adipose - Subcutaneous
PD	ENSG00000223534.1	HLA-DQB1-AS1	chr6_32604184_T_C_b38	rs17425622	1.7e-05	-0.27	Adipose - Subcutaneous
PD	ENSG00000232629.8	HLA-DQB2	chr6_32604184_T_C_b38	rs17425622	8.5e-05	0.32	Adipose - Subcutaneous
PD	ENSG00000213676.10	ATF6B	chr6_32604184_T_C_b38	rs17425622	0.00029	0.14	Adipose - Subcutaneous
PD	ENSG00000237541.3	HLA-DQA2	chr6_32604184_T_C_b38	rs17425622	1.3e-51	1.3	Adipose - Visceral (Omentum)
PD	ENSG00000229391.7	HLA-DRB6	chr6_32604184_T_C_b38	rs17425622	5.2e-30	0.93	Adipose - Visceral (Omentum)
PD	ENSG00000179344.16	HLA-DQB1	chr6_32604184_T_C_b38	rs17425622	8.1e-11	-0.51	Adipose - Visceral (Omentum)
PD	ENSG00000196301.3	HLA-DRB9	chr6_32604184_T_C_b38	rs17425622	7.4e-09	0.51	Adipose - Visceral (Omentum)
PD	ENSG00000223534.1	HLA-DQB1-AS1	chr6_32604184_T_C_b38	rs17425622	1e-06	-0.33	Adipose - Visceral (Omentum)
PD	ENSG00000241106.6	HLA-DOB	chr6_32604184_T_C_b38	rs17425622	2.8e-05	0.33	Adipose - Visceral (Omentum)
PD	ENSG00000196126.11	HLA-DRB1	chr6_32604184_T_C_b38	rs17425622	8.8e-05	-0.21	Adipose - Visceral (Omentum)
PD	ENSG00000237541.3	HLA-DQA2	chr6_32604184_T_C_b38	rs17425622	3.5e-24	1.2	Adrenal Gland
PD	ENSG00000229391.7	HLA-DRB6	chr6_32604184_T_C_b38	rs17425622	5.4e-11	0.84	Adrenal Gland
PD	ENSG00000241106.6	HLA-DOB	chr6_32604184_T_C_b38	rs17425622	5.1e-07	0.61	Adrenal Gland
PD	ENSG00000232629.8	HLA-DQB2	chr6_32604184_T_C_b38	rs17425622	1e-05	0.58	Adrenal Gland
PD	ENSG00000237541.3	HLA-DQA2	chr6_32604184_T_C_b38	rs17425622	6.7e-45	1.1	Artery - Aorta
PD	ENSG00000229391.7	HLA-DRB6	chr6_32604184_T_C_b38	rs17425622	1.3e-19	0.63	Artery - Aorta
PD	ENSG00000232629.8	HLA-DQB2	chr6_32604184_T_C_b38	rs17425622	1.9e-09	0.48	Artery - Aorta
PD	ENSG00000196735.11	HLA-DQA1	chr6_32604184_T_C_b38	rs17425622	1.6e-07	-0.29	Artery - Aorta
PD	ENSG00000241106.6	HLA-DOB	chr6_32604184_T_C_b38	rs17425622	1.2e-06	0.38	Artery - Aorta
PD	ENSG00000196126.11	HLA-DRB1	chr6_32604184_T_C_b38	rs17425622	0.00019	-0.17	Artery - Aorta
PD	ENSG00000237541.3	HLA-DQA2	chr6_32604184_T_C_b38	rs17425622	8.1e-23	1.1	Artery - Coronary
PD	ENSG00000229391.7	HLA-DRB6	chr6_32604184_T_C_b38	rs17425622	3.2e-11	0.67	Artery - Coronary
PD	ENSG00000237541.3	HLA-DQA2	chr6_32604184_T_C_b38	rs17425622	4.6e-63	1.1	Artery - Tibial
PD	ENSG00000229391.7	HLA-DRB6	chr6_32604184_T_C_b38	rs17425622	3.2e-30	0.63	Artery - Tibial
PD	ENSG00000196735.11	HLA-DQA1	chr6_32604184_T_C_b38	rs17425622	1.8e-13	-0.32	Artery - Tibial
PD	ENSG00000232629.8	HLA-DQB2	chr6_32604184_T_C_b38	rs17425622	3e-12	0.45	Artery - Tibial
PD	ENSG00000196126.11	HLA-DRB1	chr6_32604184_T_C_b38	rs17425622	3.3e-09	-0.2	Artery - Tibial
PD	ENSG00000179344.16	HLA-DQB1	chr6_32604184_T_C_b38	rs17425622	8.3e-09	-0.32	Artery - Tibial
PD	ENSG00000241106.6	HLA-DOB	chr6_32604184_T_C_b38	rs17425622	1.4e-08	0.38	Artery - Tibial
PD	ENSG00000204338.8	CYP21A1P	chr6_32604184_T_C_b38	rs17425622	1.2e-06	0.32	Artery - Tibial
PD	ENSG00000204463.12	BAG6	chr6_32604184_T_C_b38	rs17425622	4e-05	0.18	Artery - Tibial
PD	ENSG00000243649.8	CFB	chr6_32604184_T_C_b38	rs17425622	0.00023	-0.14	Artery - Tibial
PD	ENSG00000237541.3	HLA-DQA2	chr6_32604184_T_C_b38	rs17425622	2.1e-14	1	Brain - Amygdala
PD	ENSG00000229391.7	HLA-DRB6	chr6_32604184_T_C_b38	rs17425622	1.3e-06	0.57	Brain - Amygdala
PD	ENSG00000237541.3	HLA-DQA2	chr6_32604184_T_C_b38	rs17425622	1.4e-12	0.98	Brain - Anterior cingulate cortex (BA24)
PD	ENSG00000196126.11	HLA-DRB1	chr6_32604184_T_C_b38	rs17425622	1.5e-08	-0.55	Brain - Anterior cingulate cortex (BA24)
PD	ENSG00000229391.7	HLA-DRB6	chr6_32604184_T_C_b38	rs17425622	1.5e-08	0.68	Brain - Anterior cingulate cortex (BA24)
PD	ENSG00000237541.3	HLA-DQA2	chr6_32604184_T_C_b38	rs17425622	2.3e-18	1.1	Brain - Caudate (basal ganglia)
PD	ENSG00000229391.7	HLA-DRB6	chr6_32604184_T_C_b38	rs17425622	1.1e-10	0.72	Brain - Caudate (basal ganglia)
PD	ENSG00000237541.3	HLA-DQA2	chr6_32604184_T_C_b38	rs17425622	1.3e-13	0.99	Brain - Cerebellar Hemisphere
PD	ENSG00000229391.7	HLA-DRB6	chr6_32604184_T_C_b38	rs17425622	9e-10	0.75	Brain - Cerebellar Hemisphere
PD	ENSG00000196126.11	HLA-DRB1	chr6_32604184_T_C_b38	rs17425622	5.3e-05	-0.4	Brain - Cerebellar Hemisphere
PD	ENSG00000237541.3	HLA-DQA2	chr6_32604184_T_C_b38	rs17425622	1e-15	0.94	Brain - Cerebellum
PD	ENSG00000229391.7	HLA-DRB6	chr6_32604184_T_C_b38	rs17425622	1.1e-10	0.77	Brain - Cerebellum
PD	ENSG00000179344.16	HLA-DQB1	chr6_32604184_T_C_b38	rs17425622	6.2e-06	-0.52	Brain - Cerebellum
PD	ENSG00000196126.11	HLA-DRB1	chr6_32604184_T_C_b38	rs17425622	2e-05	-0.42	Brain - Cerebellum
PD	ENSG00000237541.3	HLA-DQA2	chr6_32604184_T_C_b38	rs17425622	4.6e-15	1	Brain - Cortex
PD	ENSG00000229391.7	HLA-DRB6	chr6_32604184_T_C_b38	rs17425622	5e-08	0.63	Brain - Cortex
PD	ENSG00000196126.11	HLA-DRB1	chr6_32604184_T_C_b38	rs17425622	1.1e-07	-0.46	Brain - Cortex
PD	ENSG00000232629.8	HLA-DQB2	chr6_32604184_T_C_b38	rs17425622	2e-06	0.67	Brain - Cortex
PD	ENSG00000237541.3	HLA-DQA2	chr6_32604184_T_C_b38	rs17425622	6.9e-18	1	Brain - Frontal Cortex (BA9)
PD	ENSG00000229391.7	HLA-DRB6	chr6_32604184_T_C_b38	rs17425622	9.5e-11	0.62	Brain - Frontal Cortex (BA9)
PD	ENSG00000196126.11	HLA-DRB1	chr6_32604184_T_C_b38	rs17425622	6.2e-05	-0.35	Brain - Frontal Cortex (BA9)
PD	ENSG00000237541.3	HLA-DQA2	chr6_32604184_T_C_b38	rs17425622	5.2e-15	0.98	Brain - Hippocampus
PD	ENSG00000229391.7	HLA-DRB6	chr6_32604184_T_C_b38	rs17425622	4.7e-08	0.69	Brain - Hippocampus
PD	ENSG00000232629.8	HLA-DQB2	chr6_32604184_T_C_b38	rs17425622	9.6e-08	0.68	Brain - Hippocampus
PD	ENSG00000237541.3	HLA-DQA2	chr6_32604184_T_C_b38	rs17425622	3.7e-17	1.1	Brain - Hypothalamus
PD	ENSG00000229391.7	HLA-DRB6	chr6_32604184_T_C_b38	rs17425622	1.7e-10	0.8	Brain - Hypothalamus
PD	ENSG00000196126.11	HLA-DRB1	chr6_32604184_T_C_b38	rs17425622	3.6e-05	-0.3	Brain - Hypothalamus
PD	ENSG00000237541.3	HLA-DQA2	chr6_32604184_T_C_b38	rs17425622	1.4e-22	1	Brain - Nucleus accumbens (basal ganglia)
PD	ENSG00000229391.7	HLA-DRB6	chr6_32604184_T_C_b38	rs17425622	9.4e-11	0.67	Brain - Nucleus accumbens (basal ganglia)
PD	ENSG00000232629.8	HLA-DQB2	chr6_32604184_T_C_b38	rs17425622	6.1e-06	0.46	Brain - Nucleus accumbens (basal ganglia)
PD	ENSG00000237541.3	HLA-DQA2	chr6_32604184_T_C_b38	rs17425622	1.3e-14	1	Brain - Putamen (basal ganglia)
PD	ENSG00000229391.7	HLA-DRB6	chr6_32604184_T_C_b38	rs17425622	3.5e-09	0.81	Brain - Putamen (basal ganglia)
PD	ENSG00000196126.11	HLA-DRB1	chr6_32604184_T_C_b38	rs17425622	1.5e-05	-0.43	Brain - Putamen (basal ganglia)
PD	ENSG00000237541.3	HLA-DQA2	chr6_32604184_T_C_b38	rs17425622	1.5e-12	1.1	Brain - Spinal cord (cervical c-1)
PD	ENSG00000229391.7	HLA-DRB6	chr6_32604184_T_C_b38	rs17425622	3.7e-10	0.79	Brain - Spinal cord (cervical c-1)
PD	ENSG00000237541.3	HLA-DQA2	chr6_32604184_T_C_b38	rs17425622	2.3e-10	1	Brain - Substantia nigra
PD	ENSG00000229391.7	HLA-DRB6	chr6_32604184_T_C_b38	rs17425622	3.7e-06	0.72	Brain - Substantia nigra
PD	ENSG00000237541.3	HLA-DQA2	chr6_32604184_T_C_b38	rs17425622	3.5e-36	1.2	Breast - Mammary Tissue
PD	ENSG00000229391.7	HLA-DRB6	chr6_32604184_T_C_b38	rs17425622	2.8e-21	0.78	Breast - Mammary Tissue
PD	ENSG00000179344.16	HLA-DQB1	chr6_32604184_T_C_b38	rs17425622	1.7e-09	-0.46	Breast - Mammary Tissue
PD	ENSG00000196735.11	HLA-DQA1	chr6_32604184_T_C_b38	rs17425622	1.6e-06	-0.31	Breast - Mammary Tissue
PD	ENSG00000241106.6	HLA-DOB	chr6_32604184_T_C_b38	rs17425622	2.4e-05	0.31	Breast - Mammary Tissue
PD	ENSG00000241106.6	HLA-DOB	chr6_32604184_T_C_b38	rs17425622	4.9e-08	0.35	Cells - Cultured fibroblasts
PD	ENSG00000204304.11	PBX2	chr6_32604184_T_C_b38	rs17425622	1.3e-05	0.13	Cells - Cultured fibroblasts
PD	ENSG00000204267.13	TAP2	chr6_32604184_T_C_b38	rs17425622	3.1e-05	-0.14	Cells - Cultured fibroblasts
PD	ENSG00000225914.1	XXbac-BPG154L12.4	chr6_32604184_T_C_b38	rs17425622	3.3e-05	0.33	Cells - Cultured fibroblasts
PD	ENSG00000237541.3	HLA-DQA2	chr6_32604184_T_C_b38	rs17425622	5.2e-15	1.1	Cells - EBV-transformed lymphocytes
PD	ENSG00000196735.11	HLA-DQA1	chr6_32604184_T_C_b38	rs17425622	2.7e-11	-0.93	Cells - EBV-transformed lymphocytes
PD	ENSG00000232629.8	HLA-DQB2	chr6_32604184_T_C_b38	rs17425622	4.8e-07	0.79	Cells - EBV-transformed lymphocytes
PD	ENSG00000237541.3	HLA-DQA2	chr6_32604184_T_C_b38	rs17425622	1.4e-35	1.2	Colon - Sigmoid
PD	ENSG00000229391.7	HLA-DRB6	chr6_32604184_T_C_b38	rs17425622	8.2e-25	0.99	Colon - Sigmoid
PD	ENSG00000241106.6	HLA-DOB	chr6_32604184_T_C_b38	rs17425622	2.2e-06	0.43	Colon - Sigmoid
PD	ENSG00000196126.11	HLA-DRB1	chr6_32604184_T_C_b38	rs17425622	9.7e-06	0.3	Colon - Sigmoid
PD	ENSG00000237541.3	HLA-DQA2	chr6_32604184_T_C_b38	rs17425622	2.7e-34	1	Colon - Transverse
PD	ENSG00000229391.7	HLA-DRB6	chr6_32604184_T_C_b38	rs17425622	4.8e-19	0.73	Colon - Transverse
PD	ENSG00000232629.8	HLA-DQB2	chr6_32604184_T_C_b38	rs17425622	1.8e-07	0.45	Colon - Transverse
PD	ENSG00000196735.11	HLA-DQA1	chr6_32604184_T_C_b38	rs17425622	1.1e-06	-0.26	Colon - Transverse
PD	ENSG00000241106.6	HLA-DOB	chr6_32604184_T_C_b38	rs17425622	2e-05	0.23	Colon - Transverse
PD	ENSG00000237541.3	HLA-DQA2	chr6_32604184_T_C_b38	rs17425622	2.4e-37	1.2	Esophagus - Gastroesophageal Junction
PD	ENSG00000229391.7	HLA-DRB6	chr6_32604184_T_C_b38	rs17425622	2.6e-20	0.83	Esophagus - Gastroesophageal Junction
PD	ENSG00000179344.16	HLA-DQB1	chr6_32604184_T_C_b38	rs17425622	9.2e-08	-0.5	Esophagus - Gastroesophageal Junction
PD	ENSG00000241106.6	HLA-DOB	chr6_32604184_T_C_b38	rs17425622	4.5e-06	0.45	Esophagus - Gastroesophageal Junction
PD	ENSG00000204463.12	BAG6	chr6_32604184_T_C_b38	rs17425622	3.9e-05	0.21	Esophagus - Gastroesophageal Junction
PD	ENSG00000204304.11	PBX2	chr6_32604184_T_C_b38	rs17425622	6.6e-05	0.19	Esophagus - Gastroesophageal Junction
PD	ENSG00000237541.3	HLA-DQA2	chr6_32604184_T_C_b38	rs17425622	3.1e-46	0.97	Esophagus - Mucosa
PD	ENSG00000229391.7	HLA-DRB6	chr6_32604184_T_C_b38	rs17425622	1.3e-20	0.64	Esophagus - Mucosa
PD	ENSG00000196735.11	HLA-DQA1	chr6_32604184_T_C_b38	rs17425622	9.7e-17	-0.41	Esophagus - Mucosa
PD	ENSG00000179344.16	HLA-DQB1	chr6_32604184_T_C_b38	rs17425622	9e-08	-0.36	Esophagus - Mucosa
PD	ENSG00000196126.11	HLA-DRB1	chr6_32604184_T_C_b38	rs17425622	4e-07	-0.21	Esophagus - Mucosa
PD	ENSG00000241106.6	HLA-DOB	chr6_32604184_T_C_b38	rs17425622	9.1e-07	0.32	Esophagus - Mucosa
PD	ENSG00000204338.8	CYP21A1P	chr6_32604184_T_C_b38	rs17425622	2.9e-05	0.31	Esophagus - Mucosa
PD	ENSG00000237541.3	HLA-DQA2	chr6_32604184_T_C_b38	rs17425622	2.8e-55	1.2	Esophagus - Muscularis
PD	ENSG00000229391.7	HLA-DRB6	chr6_32604184_T_C_b38	rs17425622	1.2e-31	0.89	Esophagus - Muscularis
PD	ENSG00000241106.6	HLA-DOB	chr6_32604184_T_C_b38	rs17425622	1.4e-10	0.5	Esophagus - Muscularis
PD	ENSG00000179344.16	HLA-DQB1	chr6_32604184_T_C_b38	rs17425622	4.1e-10	-0.49	Esophagus - Muscularis
PD	ENSG00000196126.11	HLA-DRB1	chr6_32604184_T_C_b38	rs17425622	2e-08	0.29	Esophagus - Muscularis
PD	ENSG00000204463.12	BAG6	chr6_32604184_T_C_b38	rs17425622	6.8e-06	0.15	Esophagus - Muscularis
PD	ENSG00000204338.8	CYP21A1P	chr6_32604184_T_C_b38	rs17425622	8.7e-06	0.27	Esophagus - Muscularis
PD	ENSG00000196735.11	HLA-DQA1	chr6_32604184_T_C_b38	rs17425622	3.7e-05	-0.29	Esophagus - Muscularis
PD	ENSG00000198502.5	HLA-DRB5	chr6_32604184_T_C_b38	rs17425622	0.00012	0.33	Esophagus - Muscularis
PD	ENSG00000237541.3	HLA-DQA2	chr6_32604184_T_C_b38	rs17425622	5e-35	1.1	Heart - Atrial Appendage
PD	ENSG00000229391.7	HLA-DRB6	chr6_32604184_T_C_b38	rs17425622	7.6e-21	0.82	Heart - Atrial Appendage
PD	ENSG00000196126.11	HLA-DRB1	chr6_32604184_T_C_b38	rs17425622	0.00011	-0.29	Heart - Atrial Appendage
PD	ENSG00000179344.16	HLA-DQB1	chr6_32604184_T_C_b38	rs17425622	0.00013	-0.36	Heart - Atrial Appendage
PD	ENSG00000237541.3	HLA-DQA2	chr6_32604184_T_C_b38	rs17425622	9.9e-42	1.2	Heart - Left Ventricle
PD	ENSG00000229391.7	HLA-DRB6	chr6_32604184_T_C_b38	rs17425622	5.1e-22	0.82	Heart - Left Ventricle
PD	ENSG00000179344.16	HLA-DQB1	chr6_32604184_T_C_b38	rs17425622	7.5e-07	-0.42	Heart - Left Ventricle
PD	ENSG00000240053.8	LY6G5B	chr6_32604184_T_C_b38	rs17425622	6.3e-05	-0.13	Heart - Left Ventricle
PD	ENSG00000237541.3	HLA-DQA2	chr6_32604184_T_C_b38	rs17425622	1.8e-07	1.3	Kidney - Cortex
PD	ENSG00000237541.3	HLA-DQA2	chr6_32604184_T_C_b38	rs17425622	5.6e-25	1.2	Liver
PD	ENSG00000229391.7	HLA-DRB6	chr6_32604184_T_C_b38	rs17425622	6e-12	0.84	Liver
PD	ENSG00000237541.3	HLA-DQA2	chr6_32604184_T_C_b38	rs17425622	3.7e-62	1.2	Lung
PD	ENSG00000229391.7	HLA-DRB6	chr6_32604184_T_C_b38	rs17425622	1.6e-30	0.82	Lung
PD	ENSG00000232629.8	HLA-DQB2	chr6_32604184_T_C_b38	rs17425622	3.8e-13	0.51	Lung
PD	ENSG00000196735.11	HLA-DQA1	chr6_32604184_T_C_b38	rs17425622	2.2e-11	-0.35	Lung
PD	ENSG00000196126.11	HLA-DRB1	chr6_32604184_T_C_b38	rs17425622	4.1e-10	-0.26	Lung
PD	ENSG00000196301.3	HLA-DRB9	chr6_32604184_T_C_b38	rs17425622	1.1e-06	0.35	Lung
PD	ENSG00000241106.6	HLA-DOB	chr6_32604184_T_C_b38	rs17425622	7.7e-05	0.26	Lung
PD	ENSG00000179344.16	HLA-DQB1	chr6_32604184_T_C_b38	rs17425622	0.00016	-0.23	Lung
PD	ENSG00000237541.3	HLA-DQA2	chr6_32604184_T_C_b38	rs17425622	1.2e-13	1.3	Minor Salivary Gland
PD	ENSG00000229391.7	HLA-DRB6	chr6_32604184_T_C_b38	rs17425622	2.1e-05	0.71	Minor Salivary Gland
PD	ENSG00000237541.3	HLA-DQA2	chr6_32604184_T_C_b38	rs17425622	1.9e-77	1.2	Muscle - Skeletal
PD	ENSG00000229391.7	HLA-DRB6	chr6_32604184_T_C_b38	rs17425622	2.2e-41	0.85	Muscle - Skeletal
PD	ENSG00000179344.16	HLA-DQB1	chr6_32604184_T_C_b38	rs17425622	5.6e-17	-0.5	Muscle - Skeletal
PD	ENSG00000223534.1	HLA-DQB1-AS1	chr6_32604184_T_C_b38	rs17425622	7.2e-13	-0.45	Muscle - Skeletal
PD	ENSG00000196126.11	HLA-DRB1	chr6_32604184_T_C_b38	rs17425622	3.7e-10	-0.26	Muscle - Skeletal
PD	ENSG00000241106.6	HLA-DOB	chr6_32604184_T_C_b38	rs17425622	1.2e-08	0.37	Muscle - Skeletal
PD	ENSG00000213676.10	ATF6B	chr6_32604184_T_C_b38	rs17425622	4.9e-06	0.15	Muscle - Skeletal
PD	ENSG00000196735.11	HLA-DQA1	chr6_32604184_T_C_b38	rs17425622	5.5e-06	-0.23	Muscle - Skeletal
PD	ENSG00000237541.3	HLA-DQA2	chr6_32604184_T_C_b38	rs17425622	1.4e-62	1.2	Nerve - Tibial
PD	ENSG00000229391.7	HLA-DRB6	chr6_32604184_T_C_b38	rs17425622	9.2e-33	0.84	Nerve - Tibial
PD	ENSG00000232629.8	HLA-DQB2	chr6_32604184_T_C_b38	rs17425622	1.4e-12	0.55	Nerve - Tibial
PD	ENSG00000196735.11	HLA-DQA1	chr6_32604184_T_C_b38	rs17425622	5.6e-09	-0.31	Nerve - Tibial
PD	ENSG00000179344.16	HLA-DQB1	chr6_32604184_T_C_b38	rs17425622	9.4e-09	-0.39	Nerve - Tibial
PD	ENSG00000241106.6	HLA-DOB	chr6_32604184_T_C_b38	rs17425622	2.6e-07	0.43	Nerve - Tibial
PD	ENSG00000204338.8	CYP21A1P	chr6_32604184_T_C_b38	rs17425622	1.6e-06	0.36	Nerve - Tibial
PD	ENSG00000196301.3	HLA-DRB9	chr6_32604184_T_C_b38	rs17425622	8e-06	0.33	Nerve - Tibial
PD	ENSG00000196126.11	HLA-DRB1	chr6_32604184_T_C_b38	rs17425622	1.1e-05	-0.18	Nerve - Tibial
PD	ENSG00000204463.12	BAG6	chr6_32604184_T_C_b38	rs17425622	3.1e-05	0.15	Nerve - Tibial
PD	ENSG00000204301.6	NOTCH4	chr6_32604184_T_C_b38	rs17425622	8.6e-05	0.19	Nerve - Tibial
PD	ENSG00000228962.1	HCG23	chr6_32604184_T_C_b38	rs17425622	0.00014	0.23	Nerve - Tibial
PD	ENSG00000237541.3	HLA-DQA2	chr6_32604184_T_C_b38	rs17425622	6.3e-15	1.1	Ovary
PD	ENSG00000229391.7	HLA-DRB6	chr6_32604184_T_C_b38	rs17425622	1.9e-07	0.64	Ovary
PD	ENSG00000241106.6	HLA-DOB	chr6_32604184_T_C_b38	rs17425622	1.6e-05	0.65	Ovary
PD	ENSG00000237541.3	HLA-DQA2	chr6_32604184_T_C_b38	rs17425622	3.6e-28	1	Pancreas
PD	ENSG00000229391.7	HLA-DRB6	chr6_32604184_T_C_b38	rs17425622	2.4e-14	0.68	Pancreas
PD	ENSG00000232629.8	HLA-DQB2	chr6_32604184_T_C_b38	rs17425622	3.8e-08	0.53	Pancreas
PD	ENSG00000196126.11	HLA-DRB1	chr6_32604184_T_C_b38	rs17425622	1.3e-05	-0.26	Pancreas
PD	ENSG00000224389.8	C4B	chr6_32604184_T_C_b38	rs17425622	3.4e-05	-0.25	Pancreas
PD	ENSG00000237541.3	HLA-DQA2	chr6_32604184_T_C_b38	rs17425622	2.4e-24	1.1	Pituitary
PD	ENSG00000229391.7	HLA-DRB6	chr6_32604184_T_C_b38	rs17425622	9.7e-14	0.7	Pituitary
PD	ENSG00000196735.11	HLA-DQA1	chr6_32604184_T_C_b38	rs17425622	6.9e-07	-0.37	Pituitary
PD	ENSG00000232629.8	HLA-DQB2	chr6_32604184_T_C_b38	rs17425622	3.9e-06	0.53	Pituitary
PD	ENSG00000237541.3	HLA-DQA2	chr6_32604184_T_C_b38	rs17425622	5.8e-27	1.2	Prostate
PD	ENSG00000229391.7	HLA-DRB6	chr6_32604184_T_C_b38	rs17425622	4e-12	0.81	Prostate
PD	ENSG00000196126.11	HLA-DRB1	chr6_32604184_T_C_b38	rs17425622	1.3e-05	-0.33	Prostate
PD	ENSG00000237541.3	HLA-DQA2	chr6_32604184_T_C_b38	rs17425622	1.3e-47	0.89	Skin - Not Sun Exposed (Suprapubic)
PD	ENSG00000196735.11	HLA-DQA1	chr6_32604184_T_C_b38	rs17425622	1.3e-28	-0.6	Skin - Not Sun Exposed (Suprapubic)
PD	ENSG00000229391.7	HLA-DRB6	chr6_32604184_T_C_b38	rs17425622	2.2e-24	0.79	Skin - Not Sun Exposed (Suprapubic)
PD	ENSG00000196126.11	HLA-DRB1	chr6_32604184_T_C_b38	rs17425622	1.4e-15	-0.36	Skin - Not Sun Exposed (Suprapubic)
PD	ENSG00000241106.6	HLA-DOB	chr6_32604184_T_C_b38	rs17425622	4e-08	0.43	Skin - Not Sun Exposed (Suprapubic)
PD	ENSG00000179344.16	HLA-DQB1	chr6_32604184_T_C_b38	rs17425622	3.5e-07	-0.36	Skin - Not Sun Exposed (Suprapubic)
PD	ENSG00000204314.10	PRRT1	chr6_32604184_T_C_b38	rs17425622	5e-06	0.23	Skin - Not Sun Exposed (Suprapubic)
PD	ENSG00000196301.3	HLA-DRB9	chr6_32604184_T_C_b38	rs17425622	1.5e-05	0.35	Skin - Not Sun Exposed (Suprapubic)
PD	ENSG00000237541.3	HLA-DQA2	chr6_32604184_T_C_b38	rs17425622	4.5e-69	1	Skin - Sun Exposed (Lower leg)
PD	ENSG00000196735.11	HLA-DQA1	chr6_32604184_T_C_b38	rs17425622	2.9e-38	-0.67	Skin - Sun Exposed (Lower leg)
PD	ENSG00000229391.7	HLA-DRB6	chr6_32604184_T_C_b38	rs17425622	5e-28	0.74	Skin - Sun Exposed (Lower leg)
PD	ENSG00000196126.11	HLA-DRB1	chr6_32604184_T_C_b38	rs17425622	9.4e-21	-0.38	Skin - Sun Exposed (Lower leg)
PD	ENSG00000179344.16	HLA-DQB1	chr6_32604184_T_C_b38	rs17425622	1.7e-12	-0.48	Skin - Sun Exposed (Lower leg)
PD	ENSG00000241106.6	HLA-DOB	chr6_32604184_T_C_b38	rs17425622	6.9e-11	0.46	Skin - Sun Exposed (Lower leg)
PD	ENSG00000237541.3	HLA-DQA2	chr6_32604184_T_C_b38	rs17425622	1.9e-16	1	Small Intestine - Terminal Ileum
PD	ENSG00000229391.7	HLA-DRB6	chr6_32604184_T_C_b38	rs17425622	2.8e-08	0.68	Small Intestine - Terminal Ileum
PD	ENSG00000232629.8	HLA-DQB2	chr6_32604184_T_C_b38	rs17425622	3.2e-05	0.44	Small Intestine - Terminal Ileum
PD	ENSG00000237541.3	HLA-DQA2	chr6_32604184_T_C_b38	rs17425622	4.1e-27	1.1	Spleen
PD	ENSG00000196735.11	HLA-DQA1	chr6_32604184_T_C_b38	rs17425622	2.9e-14	-0.51	Spleen
PD	ENSG00000229391.7	HLA-DRB6	chr6_32604184_T_C_b38	rs17425622	8.8e-11	0.74	Spleen
PD	ENSG00000196126.11	HLA-DRB1	chr6_32604184_T_C_b38	rs17425622	1e-06	-0.3	Spleen
PD	ENSG00000232629.8	HLA-DQB2	chr6_32604184_T_C_b38	rs17425622	6e-05	0.45	Spleen
PD	ENSG00000237541.3	HLA-DQA2	chr6_32604184_T_C_b38	rs17425622	3.4e-34	1	Stomach
PD	ENSG00000229391.7	HLA-DRB6	chr6_32604184_T_C_b38	rs17425622	3e-15	0.58	Stomach
PD	ENSG00000232629.8	HLA-DQB2	chr6_32604184_T_C_b38	rs17425622	3.9e-08	0.49	Stomach
PD	ENSG00000179344.16	HLA-DQB1	chr6_32604184_T_C_b38	rs17425622	1.1e-06	-0.44	Stomach
PD	ENSG00000241106.6	HLA-DOB	chr6_32604184_T_C_b38	rs17425622	1.9e-05	0.3	Stomach
PD	ENSG00000237541.3	HLA-DQA2	chr6_32604184_T_C_b38	rs17425622	3e-29	1.1	Testis
PD	ENSG00000229391.7	HLA-DRB6	chr6_32604184_T_C_b38	rs17425622	2.8e-12	0.61	Testis
PD	ENSG00000232629.8	HLA-DQB2	chr6_32604184_T_C_b38	rs17425622	8.4e-09	0.61	Testis
PD	ENSG00000204338.8	CYP21A1P	chr6_32604184_T_C_b38	rs17425622	4.5e-06	0.43	Testis
PD	ENSG00000196126.11	HLA-DRB1	chr6_32604184_T_C_b38	rs17425622	2.5e-05	-0.35	Testis
PD	ENSG00000237285.1	HNRNPA1P2	chr6_32604184_T_C_b38	rs17425622	0.00013	0.31	Testis
PD	ENSG00000196735.11	HLA-DQA1	chr6_32604184_T_C_b38	rs17425622	0.00013	-0.29	Testis
PD	ENSG00000237541.3	HLA-DQA2	chr6_32604184_T_C_b38	rs17425622	5e-57	1.1	Thyroid
PD	ENSG00000229391.7	HLA-DRB6	chr6_32604184_T_C_b38	rs17425622	8.6e-33	0.84	Thyroid
PD	ENSG00000179344.16	HLA-DQB1	chr6_32604184_T_C_b38	rs17425622	2e-09	-0.41	Thyroid
PD	ENSG00000196301.3	HLA-DRB9	chr6_32604184_T_C_b38	rs17425622	5.5e-09	0.44	Thyroid
PD	ENSG00000196126.11	HLA-DRB1	chr6_32604184_T_C_b38	rs17425622	4.7e-08	-0.26	Thyroid
PD	ENSG00000196735.11	HLA-DQA1	chr6_32604184_T_C_b38	rs17425622	1.5e-07	-0.27	Thyroid
PD	ENSG00000232629.8	HLA-DQB2	chr6_32604184_T_C_b38	rs17425622	3.1e-05	0.3	Thyroid
PD	ENSG00000241106.6	HLA-DOB	chr6_32604184_T_C_b38	rs17425622	0.00022	0.2	Thyroid
PD	ENSG00000237541.3	HLA-DQA2	chr6_32604184_T_C_b38	rs17425622	1.1e-17	1.2	Uterus
PD	ENSG00000229391.7	HLA-DRB6	chr6_32604184_T_C_b38	rs17425622	1e-09	0.81	Uterus
PD	ENSG00000237541.3	HLA-DQA2	chr6_32604184_T_C_b38	rs17425622	1.3e-12	0.98	Vagina
PD	ENSG00000229391.7	HLA-DRB6	chr6_32604184_T_C_b38	rs17425622	1.5e-07	0.7	Vagina
PD	ENSG00000237541.3	HLA-DQA2	chr6_32604184_T_C_b38	rs17425622	6.4e-69	1.1	Whole Blood
PD	ENSG00000232629.8	HLA-DQB2	chr6_32604184_T_C_b38	rs17425622	9.7e-21	0.55	Whole Blood
PD	ENSG00000229391.7	HLA-DRB6	chr6_32604184_T_C_b38	rs17425622	5e-20	0.53	Whole Blood
PD	ENSG00000196126.11	HLA-DRB1	chr6_32604184_T_C_b38	rs17425622	3.2e-15	-0.19	Whole Blood
PD	ENSG00000179344.16	HLA-DQB1	chr6_32604184_T_C_b38	rs17425622	3.9e-12	-0.33	Whole Blood
PD	ENSG00000196735.11	HLA-DQA1	chr6_32604184_T_C_b38	rs17425622	6.8e-10	-0.19	Whole Blood
PD	ENSG00000204338.8	CYP21A1P	chr6_32604184_T_C_b38	rs17425622	8.7e-08	0.33	Whole Blood
PD	ENSG00000196301.3	HLA-DRB9	chr6_32604184_T_C_b38	rs17425622	7.6e-06	0.26	Whole Blood
PD	ENSG00000223534.1	HLA-DQB1-AS1	chr6_32604184_T_C_b38	rs17425622	8.4e-06	-0.18	Whole Blood
PD	ENSG00000240053.8	LY6G5B	chr6_32604184_T_C_b38	rs17425622	2.3e-05	-0.1	Whole Blood
PD	ENSG00000241106.6	HLA-DOB	chr6_32604184_T_C_b38	rs17425622	4.9e-05	0.15	Whole Blood
PD	ENSG00000179406.7	LINC00174	chr7_66544864_T_A_b38	rs76949143	1.9e-18	0.47	Adipose - Subcutaneous
PD	ENSG00000229180.6	GS1-124K5.12	chr7_66544864_T_A_b38	rs76949143	3.6e-05	0.19	Adipose - Subcutaneous
PD	ENSG00000179406.7	LINC00174	chr7_66544864_T_A_b38	rs76949143	1.3e-08	0.31	Adipose - Visceral (Omentum)
PD	ENSG00000230189.7	GS1-124K5.2	chr7_66544864_T_A_b38	rs76949143	1.5e-05	0.44	Adipose - Visceral (Omentum)
PD	ENSG00000244510.2	GS1-124K5.7	chr7_66544864_T_A_b38	rs76949143	6e-05	0.5	Adipose - Visceral (Omentum)
PD	ENSG00000241258.6	CRCP	chr7_66544864_T_A_b38	rs76949143	2.3e-05	0.56	Adrenal Gland
PD	ENSG00000179406.7	LINC00174	chr7_66544864_T_A_b38	rs76949143	4.4e-12	0.42	Artery - Aorta
PD	ENSG00000230189.7	GS1-124K5.2	chr7_66544864_T_A_b38	rs76949143	3.9e-07	0.64	Artery - Aorta
PD	ENSG00000229180.6	GS1-124K5.12	chr7_66544864_T_A_b38	rs76949143	1e-06	0.35	Artery - Aorta
PD	ENSG00000241258.6	CRCP	chr7_66544864_T_A_b38	rs76949143	2.2e-06	0.48	Artery - Aorta
PD	ENSG00000106610.14	STAG3L4	chr7_66544864_T_A_b38	rs76949143	6.7e-06	0.62	Artery - Aorta
PD	ENSG00000179406.7	LINC00174	chr7_66544864_T_A_b38	rs76949143	6.5e-23	0.54	Artery - Tibial
PD	ENSG00000230189.7	GS1-124K5.2	chr7_66544864_T_A_b38	rs76949143	4.4e-09	0.52	Artery - Tibial
PD	ENSG00000106610.14	STAG3L4	chr7_66544864_T_A_b38	rs76949143	2.6e-05	0.34	Artery - Tibial
PD	ENSG00000251451.1	GTF2IP9	chr7_66544864_T_A_b38	rs76949143	3.4e-05	0.41	Artery - Tibial
PD	ENSG00000244510.2	GS1-124K5.7	chr7_66544864_T_A_b38	rs76949143	9.5e-05	0.42	Artery - Tibial
PD	ENSG00000226824.6	RP4-756H11.3	chr7_66544864_T_A_b38	rs76949143	0.00015	-0.47	Artery - Tibial
PD	ENSG00000231234.2	SKP1P1	chr7_66544864_T_A_b38	rs76949143	0.00019	0.34	Artery - Tibial
PD	ENSG00000244657.1	GS1-124K5.8	chr7_66544864_T_A_b38	rs76949143	0.0002	0.43	Artery - Tibial
PD	ENSG00000229180.6	GS1-124K5.12	chr7_66544864_T_A_b38	rs76949143	0.00026	0.18	Artery - Tibial
PD	ENSG00000179406.7	LINC00174	chr7_66544864_T_A_b38	rs76949143	3.2e-05	0.37	Brain - Anterior cingulate cortex (BA24)
PD	ENSG00000273142.1	RP11-458F8.4	chr7_66544864_T_A_b38	rs76949143	4e-05	-0.5	Brain - Anterior cingulate cortex (BA24)
PD	ENSG00000179406.7	LINC00174	chr7_66544864_T_A_b38	rs76949143	4.1e-08	0.47	Brain - Caudate (basal ganglia)
PD	ENSG00000241258.6	CRCP	chr7_66544864_T_A_b38	rs76949143	0.00015	0.54	Brain - Caudate (basal ganglia)
PD	ENSG00000226824.6	RP4-756H11.3	chr7_66544864_T_A_b38	rs76949143	0.00016	-0.78	Brain - Caudate (basal ganglia)
PD	ENSG00000179406.7	LINC00174	chr7_66544864_T_A_b38	rs76949143	6e-12	1.1	Brain - Cerebellar Hemisphere
PD	ENSG00000230189.7	GS1-124K5.2	chr7_66544864_T_A_b38	rs76949143	2.6e-05	0.9	Brain - Cerebellar Hemisphere
PD	ENSG00000179406.7	LINC00174	chr7_66544864_T_A_b38	rs76949143	5.5e-16	1.1	Brain - Cerebellum
PD	ENSG00000179406.7	LINC00174	chr7_66544864_T_A_b38	rs76949143	3.7e-07	0.32	Brain - Cortex
PD	ENSG00000241258.6	CRCP	chr7_66544864_T_A_b38	rs76949143	4.7e-05	0.57	Brain - Cortex
PD	ENSG00000241258.6	CRCP	chr7_66544864_T_A_b38	rs76949143	3.3e-06	0.81	Brain - Frontal Cortex (BA9)
PD	ENSG00000179406.7	LINC00174	chr7_66544864_T_A_b38	rs76949143	7.3e-07	0.41	Brain - Hippocampus
PD	ENSG00000106610.14	STAG3L4	chr7_66544864_T_A_b38	rs76949143	9.8e-06	0.62	Brain - Hippocampus
PD	ENSG00000241258.6	CRCP	chr7_66544864_T_A_b38	rs76949143	8.2e-05	0.43	Brain - Hippocampus
PD	ENSG00000179406.7	LINC00174	chr7_66544864_T_A_b38	rs76949143	1.3e-05	0.37	Brain - Hypothalamus
PD	ENSG00000106610.14	STAG3L4	chr7_66544864_T_A_b38	rs76949143	5e-05	0.74	Brain - Hypothalamus
PD	ENSG00000179406.7	LINC00174	chr7_66544864_T_A_b38	rs76949143	3.7e-07	0.45	Brain - Nucleus accumbens (basal ganglia)
PD	ENSG00000273142.1	RP11-458F8.4	chr7_66544864_T_A_b38	rs76949143	1.3e-06	-0.54	Brain - Nucleus accumbens (basal ganglia)
PD	ENSG00000196715.5	VKORC1L1	chr7_66544864_T_A_b38	rs76949143	2e-06	0.6	Brain - Spinal cord (cervical c-1)
PD	ENSG00000179406.7	LINC00174	chr7_66544864_T_A_b38	rs76949143	1.2e-07	0.35	Breast - Mammary Tissue
PD	ENSG00000241258.6	CRCP	chr7_66544864_T_A_b38	rs76949143	0.0002	0.36	Breast - Mammary Tissue
PD	ENSG00000179406.7	LINC00174	chr7_66544864_T_A_b38	rs76949143	1.4e-20	0.35	Cells - Cultured fibroblasts
PD	ENSG00000230189.7	GS1-124K5.2	chr7_66544864_T_A_b38	rs76949143	5.8e-08	0.38	Cells - Cultured fibroblasts
PD	ENSG00000106610.14	STAG3L4	chr7_66544864_T_A_b38	rs76949143	2.1e-05	0.37	Cells - Cultured fibroblasts
PD	ENSG00000196715.5	VKORC1L1	chr7_66544864_T_A_b38	rs76949143	3.5e-05	0.15	Cells - Cultured fibroblasts
PD	ENSG00000241258.6	CRCP	chr7_66544864_T_A_b38	rs76949143	4.1e-05	0.25	Cells - Cultured fibroblasts
PD	ENSG00000273142.1	RP11-458F8.4	chr7_66544864_T_A_b38	rs76949143	8.6e-05	-0.26	Cells - Cultured fibroblasts
PD	ENSG00000244510.2	GS1-124K5.7	chr7_66544864_T_A_b38	rs76949143	0.00012	0.36	Cells - Cultured fibroblasts
PD	ENSG00000244657.1	GS1-124K5.8	chr7_66544864_T_A_b38	rs76949143	0.00024	0.37	Cells - Cultured fibroblasts
PD	ENSG00000229180.6	GS1-124K5.12	chr7_66544864_T_A_b38	rs76949143	0.00025	0.23	Cells - Cultured fibroblasts
PD	ENSG00000179406.7	LINC00174	chr7_66544864_T_A_b38	rs76949143	3.9e-12	0.49	Colon - Sigmoid
PD	ENSG00000244510.2	GS1-124K5.7	chr7_66544864_T_A_b38	rs76949143	6.7e-06	0.69	Colon - Sigmoid
PD	ENSG00000230189.7	GS1-124K5.2	chr7_66544864_T_A_b38	rs76949143	6.7e-05	0.49	Colon - Sigmoid
PD	ENSG00000179406.7	LINC00174	chr7_66544864_T_A_b38	rs76949143	2.1e-10	0.47	Colon - Transverse
PD	ENSG00000251451.1	GTF2IP9	chr7_66544864_T_A_b38	rs76949143	0.00025	0.55	Colon - Transverse
PD	ENSG00000179406.7	LINC00174	chr7_66544864_T_A_b38	rs76949143	7.1e-12	0.46	Esophagus - Gastroesophageal Junction
PD	ENSG00000230189.7	GS1-124K5.2	chr7_66544864_T_A_b38	rs76949143	7.8e-07	0.71	Esophagus - Gastroesophageal Junction
PD	ENSG00000229180.6	GS1-124K5.12	chr7_66544864_T_A_b38	rs76949143	1.1e-05	0.37	Esophagus - Gastroesophageal Junction
PD	ENSG00000179406.7	LINC00174	chr7_66544864_T_A_b38	rs76949143	1.5e-10	0.36	Esophagus - Mucosa
PD	ENSG00000241258.6	CRCP	chr7_66544864_T_A_b38	rs76949143	2.7e-08	0.47	Esophagus - Mucosa
PD	ENSG00000179406.7	LINC00174	chr7_66544864_T_A_b38	rs76949143	1.1e-17	0.45	Esophagus - Muscularis
PD	ENSG00000244657.1	GS1-124K5.8	chr7_66544864_T_A_b38	rs76949143	2.3e-07	0.76	Esophagus - Muscularis
PD	ENSG00000244510.2	GS1-124K5.7	chr7_66544864_T_A_b38	rs76949143	9.7e-06	0.59	Esophagus - Muscularis
PD	ENSG00000230189.7	GS1-124K5.2	chr7_66544864_T_A_b38	rs76949143	2.9e-05	0.49	Esophagus - Muscularis
PD	ENSG00000229180.6	GS1-124K5.12	chr7_66544864_T_A_b38	rs76949143	3.2e-05	0.28	Esophagus - Muscularis
PD	ENSG00000179406.7	LINC00174	chr7_66544864_T_A_b38	rs76949143	3.4e-10	0.37	Heart - Atrial Appendage
PD	ENSG00000179406.7	LINC00174	chr7_66544864_T_A_b38	rs76949143	7.5e-08	0.32	Heart - Left Ventricle
PD	ENSG00000229180.6	GS1-124K5.12	chr7_66544864_T_A_b38	rs76949143	0.00013	0.34	Heart - Left Ventricle
PD	ENSG00000179406.7	LINC00174	chr7_66544864_T_A_b38	rs76949143	2.8e-10	0.31	Lung
PD	ENSG00000229180.6	GS1-124K5.12	chr7_66544864_T_A_b38	rs76949143	1.3e-06	0.34	Lung
PD	ENSG00000241258.6	CRCP	chr7_66544864_T_A_b38	rs76949143	0.00012	0.29	Lung
PD	ENSG00000179406.7	LINC00174	chr7_66544864_T_A_b38	rs76949143	2.8e-15	0.36	Muscle - Skeletal
PD	ENSG00000244510.2	GS1-124K5.7	chr7_66544864_T_A_b38	rs76949143	1.7e-06	0.47	Muscle - Skeletal
PD	ENSG00000241258.6	CRCP	chr7_66544864_T_A_b38	rs76949143	7.5e-06	0.38	Muscle - Skeletal
PD	ENSG00000106610.14	STAG3L4	chr7_66544864_T_A_b38	rs76949143	8.8e-06	0.38	Muscle - Skeletal
PD	ENSG00000273448.1	RP11-166O4.6	chr7_66544864_T_A_b38	rs76949143	1.5e-05	-0.4	Muscle - Skeletal
PD	ENSG00000229180.6	GS1-124K5.12	chr7_66544864_T_A_b38	rs76949143	3.3e-05	0.31	Muscle - Skeletal
PD	ENSG00000273142.1	RP11-458F8.4	chr7_66544864_T_A_b38	rs76949143	5.5e-05	-0.26	Muscle - Skeletal
PD	ENSG00000230189.7	GS1-124K5.2	chr7_66544864_T_A_b38	rs76949143	0.00018	0.32	Muscle - Skeletal
PD	ENSG00000179406.7	LINC00174	chr7_66544864_T_A_b38	rs76949143	1.3e-09	0.34	Nerve - Tibial
PD	ENSG00000229180.6	GS1-124K5.12	chr7_66544864_T_A_b38	rs76949143	1.4e-05	0.28	Nerve - Tibial
PD	ENSG00000230189.7	GS1-124K5.2	chr7_66544864_T_A_b38	rs76949143	0.0003	0.35	Nerve - Tibial
PD	ENSG00000273024.5	INTS4P2	chr7_66544864_T_A_b38	rs76949143	5.1e-05	-1.1	Ovary
PD	ENSG00000179406.7	LINC00174	chr7_66544864_T_A_b38	rs76949143	2.7e-09	0.46	Pancreas
PD	ENSG00000241258.6	CRCP	chr7_66544864_T_A_b38	rs76949143	4e-05	0.39	Pancreas
PD	ENSG00000251451.1	GTF2IP9	chr7_66544864_T_A_b38	rs76949143	4.2e-05	0.69	Pancreas
PD	ENSG00000179406.7	LINC00174	chr7_66544864_T_A_b38	rs76949143	9.8e-24	0.97	Pituitary
PD	ENSG00000230189.7	GS1-124K5.2	chr7_66544864_T_A_b38	rs76949143	1.5e-09	0.62	Pituitary
PD	ENSG00000179131.7	RP11-458F8.3	chr7_66544864_T_A_b38	rs76949143	9.1e-08	0.98	Pituitary
PD	ENSG00000231234.2	SKP1P1	chr7_66544864_T_A_b38	rs76949143	1.2e-06	0.51	Pituitary
PD	ENSG00000179406.7	LINC00174	chr7_66544864_T_A_b38	rs76949143	2e-05	0.24	Skin - Not Sun Exposed (Suprapubic)
PD	ENSG00000230189.7	GS1-124K5.2	chr7_66544864_T_A_b38	rs76949143	0.0002	0.31	Skin - Not Sun Exposed (Suprapubic)
PD	ENSG00000179406.7	LINC00174	chr7_66544864_T_A_b38	rs76949143	3.6e-11	0.37	Skin - Sun Exposed (Lower leg)
PD	ENSG00000230189.7	GS1-124K5.2	chr7_66544864_T_A_b38	rs76949143	1.3e-08	0.45	Skin - Sun Exposed (Lower leg)
PD	ENSG00000244510.2	GS1-124K5.7	chr7_66544864_T_A_b38	rs76949143	3.3e-07	0.49	Skin - Sun Exposed (Lower leg)
PD	ENSG00000179406.7	LINC00174	chr7_66544864_T_A_b38	rs76949143	0.00012	0.45	Spleen
PD	ENSG00000179406.7	LINC00174	chr7_66544864_T_A_b38	rs76949143	1.4e-09	0.38	Stomach
PD	ENSG00000230189.7	GS1-124K5.2	chr7_66544864_T_A_b38	rs76949143	8.6e-05	0.45	Stomach
PD	ENSG00000179131.7	RP11-458F8.3	chr7_66544864_T_A_b38	rs76949143	7e-17	1.3	Testis
PD	ENSG00000229180.6	GS1-124K5.12	chr7_66544864_T_A_b38	rs76949143	5.2e-06	0.43	Testis
PD	ENSG00000244510.2	GS1-124K5.7	chr7_66544864_T_A_b38	rs76949143	4.6e-05	0.52	Testis
PD	ENSG00000241258.6	CRCP	chr7_66544864_T_A_b38	rs76949143	1.4e-11	0.53	Thyroid
PD	ENSG00000179406.7	LINC00174	chr7_66544864_T_A_b38	rs76949143	2.5e-11	0.34	Thyroid
PD	ENSG00000229180.6	GS1-124K5.12	chr7_66544864_T_A_b38	rs76949143	8.8e-08	0.29	Thyroid
PD	ENSG00000230189.7	GS1-124K5.2	chr7_66544864_T_A_b38	rs76949143	1.1e-05	0.35	Thyroid
PD	ENSG00000106610.14	STAG3L4	chr7_66544864_T_A_b38	rs76949143	1.4e-05	0.44	Thyroid
PD	ENSG00000179406.7	LINC00174	chr7_66544864_T_A_b38	rs76949143	1.7e-09	0.27	Whole Blood
PD	ENSG00000156603.15	MED19	chr11_57926788_A_C_b38	rs687432	4.1e-07	0.2	Adipose - Subcutaneous
PD	ENSG00000156599.10	ZDHHC5	chr11_57926788_A_C_b38	rs687432	3.7e-05	-0.14	Artery - Coronary
PD	ENSG00000156603.15	MED19	chr11_57926788_A_C_b38	rs687432	3.1e-05	0.15	Artery - Tibial
PD	ENSG00000156599.10	ZDHHC5	chr11_57926788_A_C_b38	rs687432	6.7e-05	-0.074	Artery - Tibial
PD	ENSG00000156603.15	MED19	chr11_57926788_A_C_b38	rs687432	1.9e-08	0.23	Colon - Transverse
PD	ENSG00000156603.15	MED19	chr11_57926788_A_C_b38	rs687432	1e-17	0.38	Esophagus - Mucosa
PD	ENSG00000213593.9	TMX2	chr11_57926788_A_C_b38	rs687432	0.00028	-0.093	Esophagus - Mucosa
PD	ENSG00000156603.15	MED19	chr11_57926788_A_C_b38	rs687432	6.4e-06	0.22	Esophagus - Muscularis
PD	ENSG00000156603.15	MED19	chr11_57926788_A_C_b38	rs687432	2.3e-11	0.31	Heart - Atrial Appendage
PD	ENSG00000242689.2	CNTF	chr11_57926788_A_C_b38	rs687432	0.00012	0.24	Heart - Atrial Appendage
PD	ENSG00000156603.15	MED19	chr11_57926788_A_C_b38	rs687432	1.2e-05	0.22	Heart - Left Ventricle
PD	ENSG00000156599.10	ZDHHC5	chr11_57926788_A_C_b38	rs687432	0.00023	0.097	Heart - Left Ventricle
PD	ENSG00000156603.15	MED19	chr11_57926788_A_C_b38	rs687432	3.7e-06	0.14	Lung
PD	ENSG00000156603.15	MED19	chr11_57926788_A_C_b38	rs687432	1.1e-10	0.19	Muscle - Skeletal
PD	ENSG00000156599.10	ZDHHC5	chr11_57926788_A_C_b38	rs687432	0.00013	-0.072	Nerve - Tibial
PD	ENSG00000156603.15	MED19	chr11_57926788_A_C_b38	rs687432	6e-08	0.2	Skin - Not Sun Exposed (Suprapubic)
PD	ENSG00000166793.10	YPEL4	chr11_57926788_A_C_b38	rs687432	0.00021	-0.13	Skin - Not Sun Exposed (Suprapubic)
PD	ENSG00000134817.10	APLNR	chr11_57926788_A_C_b38	rs687432	0.00044	-0.11	Skin - Not Sun Exposed (Suprapubic)
PD	ENSG00000156603.15	MED19	chr11_57926788_A_C_b38	rs687432	1.8e-12	0.23	Skin - Sun Exposed (Lower leg)
PD	ENSG00000166793.10	YPEL4	chr11_57926788_A_C_b38	rs687432	3.7e-05	-0.14	Skin - Sun Exposed (Lower leg)
PD	ENSG00000156599.10	ZDHHC5	chr11_57926788_A_C_b38	rs687432	0.0001	-0.06	Skin - Sun Exposed (Lower leg)
PD	ENSG00000156603.15	MED19	chr11_57926788_A_C_b38	rs687432	4e-05	-0.2	Testis
PD	ENSG00000156603.15	MED19	chr11_57926788_A_C_b38	rs687432	4.3e-12	0.24	Thyroid
PD	ENSG00000254602.1	AP000662.4	chr11_57926788_A_C_b38	rs687432	0.00014	0.19	Thyroid
PD	ENSG00000156603.15	MED19	chr11_57926788_A_C_b38	rs687432	5.2e-05	0.11	Whole Blood
PD	ENSG00000103510.19	KAT8	chr16_31110472_G_A_b38	rs14235	1.5e-38	-0.35	Adipose - Subcutaneous
PD	ENSG00000260911.2	RP11-196G11.2	chr16_31110472_G_A_b38	rs14235	2.8e-11	-0.29	Adipose - Subcutaneous
PD	ENSG00000167394.12	ZNF668	chr16_31110472_G_A_b38	rs14235	2.2e-06	0.13	Adipose - Subcutaneous
PD	ENSG00000260304.1	RP11-388M20.6	chr16_31110472_G_A_b38	rs14235	4.7e-06	0.18	Adipose - Subcutaneous
PD	ENSG00000151006.7	PRSS53	chr16_31110472_G_A_b38	rs14235	4.8e-05	0.12	Adipose - Subcutaneous
PD	ENSG00000103510.19	KAT8	chr16_31110472_G_A_b38	rs14235	1.7e-28	-0.34	Adipose - Visceral (Omentum)
PD	ENSG00000260911.2	RP11-196G11.2	chr16_31110472_G_A_b38	rs14235	5e-09	-0.32	Adipose - Visceral (Omentum)
PD	ENSG00000099381.17	SETD1A	chr16_31110472_G_A_b38	rs14235	1.1e-05	-0.094	Adipose - Visceral (Omentum)
PD	ENSG00000167394.12	ZNF668	chr16_31110472_G_A_b38	rs14235	5.6e-05	0.16	Adipose - Visceral (Omentum)
PD	ENSG00000103510.19	KAT8	chr16_31110472_G_A_b38	rs14235	1.4e-29	-0.55	Adrenal Gland
PD	ENSG00000167397.14	VKORC1	chr16_31110472_G_A_b38	rs14235	3.1e-17	0.59	Adrenal Gland
PD	ENSG00000232748.3	RP11-196G11.6	chr16_31110472_G_A_b38	rs14235	4.5e-09	0.49	Adrenal Gland
PD	ENSG00000099377.13	HSD3B7	chr16_31110472_G_A_b38	rs14235	7.6e-05	-0.23	Adrenal Gland
PD	ENSG00000103510.19	KAT8	chr16_31110472_G_A_b38	rs14235	2.1e-23	-0.43	Artery - Aorta
PD	ENSG00000260911.2	RP11-196G11.2	chr16_31110472_G_A_b38	rs14235	1.7e-06	-0.3	Artery - Aorta
PD	ENSG00000099365.10	STX1B	chr16_31110472_G_A_b38	rs14235	9.1e-05	-0.21	Artery - Aorta
PD	ENSG00000103510.19	KAT8	chr16_31110472_G_A_b38	rs14235	5.3e-08	-0.32	Artery - Coronary
PD	ENSG00000103510.19	KAT8	chr16_31110472_G_A_b38	rs14235	1.3e-37	-0.36	Artery - Tibial
PD	ENSG00000167394.12	ZNF668	chr16_31110472_G_A_b38	rs14235	2.2e-07	0.19	Artery - Tibial
PD	ENSG00000260911.2	RP11-196G11.2	chr16_31110472_G_A_b38	rs14235	8.9e-07	-0.22	Artery - Tibial
PD	ENSG00000151006.7	PRSS53	chr16_31110472_G_A_b38	rs14235	6.6e-06	0.12	Artery - Tibial
PD	ENSG00000167395.10	ZNF646	chr16_31110472_G_A_b38	rs14235	0.00014	-0.086	Artery - Tibial
PD	ENSG00000103510.19	KAT8	chr16_31110472_G_A_b38	rs14235	2.6e-05	-0.36	Brain - Amygdala
PD	ENSG00000103510.19	KAT8	chr16_31110472_G_A_b38	rs14235	2.8e-05	-0.31	Brain - Anterior cingulate cortex (BA24)
PD	ENSG00000103510.19	KAT8	chr16_31110472_G_A_b38	rs14235	7.3e-08	-0.3	Brain - Caudate (basal ganglia)
PD	ENSG00000167395.10	ZNF646	chr16_31110472_G_A_b38	rs14235	5.5e-05	-0.2	Brain - Caudate (basal ganglia)
PD	ENSG00000103510.19	KAT8	chr16_31110472_G_A_b38	rs14235	1.8e-19	-0.37	Brain - Cerebellar Hemisphere
PD	ENSG00000260911.2	RP11-196G11.2	chr16_31110472_G_A_b38	rs14235	4.3e-07	-0.33	Brain - Cerebellar Hemisphere
PD	ENSG00000103510.19	KAT8	chr16_31110472_G_A_b38	rs14235	5.4e-19	-0.5	Brain - Cerebellum
PD	ENSG00000260911.2	RP11-196G11.2	chr16_31110472_G_A_b38	rs14235	3e-07	-0.38	Brain - Cerebellum
PD	ENSG00000262766.1	RP11-196G11.4	chr16_31110472_G_A_b38	rs14235	1.5e-06	-0.31	Brain - Cerebellum
PD	ENSG00000103510.19	KAT8	chr16_31110472_G_A_b38	rs14235	2.4e-16	-0.45	Brain - Cortex
PD	ENSG00000167397.14	VKORC1	chr16_31110472_G_A_b38	rs14235	5.8e-07	0.26	Brain - Cortex
PD	ENSG00000178226.10	PRSS36	chr16_31110472_G_A_b38	rs14235	3.8e-05	-0.39	Brain - Cortex
PD	ENSG00000103510.19	KAT8	chr16_31110472_G_A_b38	rs14235	6.1e-11	-0.35	Brain - Frontal Cortex (BA9)
PD	ENSG00000103510.19	KAT8	chr16_31110472_G_A_b38	rs14235	4.3e-07	-0.29	Brain - Hippocampus
PD	ENSG00000103510.19	KAT8	chr16_31110472_G_A_b38	rs14235	1.6e-08	-0.35	Brain - Hypothalamus
PD	ENSG00000178226.10	PRSS36	chr16_31110472_G_A_b38	rs14235	5.9e-06	-0.37	Brain - Hypothalamus
PD	ENSG00000103496.14	STX4	chr16_31110472_G_A_b38	rs14235	5.3e-05	0.19	Brain - Hypothalamus
PD	ENSG00000103510.19	KAT8	chr16_31110472_G_A_b38	rs14235	5.8e-10	-0.31	Brain - Nucleus accumbens (basal ganglia)
PD	ENSG00000178226.10	PRSS36	chr16_31110472_G_A_b38	rs14235	4.3e-06	-0.34	Brain - Nucleus accumbens (basal ganglia)
PD	ENSG00000103510.19	KAT8	chr16_31110472_G_A_b38	rs14235	4e-10	-0.38	Brain - Putamen (basal ganglia)
PD	ENSG00000167395.10	ZNF646	chr16_31110472_G_A_b38	rs14235	3.3e-07	-0.31	Brain - Putamen (basal ganglia)
PD	ENSG00000103510.19	KAT8	chr16_31110472_G_A_b38	rs14235	1.4e-25	-0.31	Breast - Mammary Tissue
PD	ENSG00000260911.2	RP11-196G11.2	chr16_31110472_G_A_b38	rs14235	2.6e-09	-0.34	Breast - Mammary Tissue
PD	ENSG00000103510.19	KAT8	chr16_31110472_G_A_b38	rs14235	6.2e-33	-0.38	Cells - Cultured fibroblasts
PD	ENSG00000167397.14	VKORC1	chr16_31110472_G_A_b38	rs14235	6.3e-17	0.21	Cells - Cultured fibroblasts
PD	ENSG00000260911.2	RP11-196G11.2	chr16_31110472_G_A_b38	rs14235	8.9e-08	-0.25	Cells - Cultured fibroblasts
PD	ENSG00000151006.7	PRSS53	chr16_31110472_G_A_b38	rs14235	9.4e-08	0.17	Cells - Cultured fibroblasts
PD	ENSG00000167394.12	ZNF668	chr16_31110472_G_A_b38	rs14235	5e-05	0.11	Cells - Cultured fibroblasts
PD	ENSG00000278922.1	AC002310.14	chr16_31110472_G_A_b38	rs14235	0.00018	-0.14	Cells - Cultured fibroblasts
PD	ENSG00000260304.1	RP11-388M20.6	chr16_31110472_G_A_b38	rs14235	0.00025	0.096	Cells - Cultured fibroblasts
PD	ENSG00000103510.19	KAT8	chr16_31110472_G_A_b38	rs14235	4.7e-10	-0.53	Cells - EBV-transformed lymphocytes
PD	ENSG00000103510.19	KAT8	chr16_31110472_G_A_b38	rs14235	5e-16	-0.29	Colon - Sigmoid
PD	ENSG00000260911.2	RP11-196G11.2	chr16_31110472_G_A_b38	rs14235	1.6e-07	-0.31	Colon - Sigmoid
PD	ENSG00000278922.1	AC002310.14	chr16_31110472_G_A_b38	rs14235	1.7e-06	-0.19	Colon - Sigmoid
PD	ENSG00000260304.1	RP11-388M20.6	chr16_31110472_G_A_b38	rs14235	9.9e-05	0.19	Colon - Sigmoid
PD	ENSG00000103510.19	KAT8	chr16_31110472_G_A_b38	rs14235	2.2e-18	-0.3	Colon - Transverse
PD	ENSG00000260911.2	RP11-196G11.2	chr16_31110472_G_A_b38	rs14235	7.3e-09	-0.31	Colon - Transverse
PD	ENSG00000099377.13	HSD3B7	chr16_31110472_G_A_b38	rs14235	1.4e-05	-0.19	Colon - Transverse
PD	ENSG00000167394.12	ZNF668	chr16_31110472_G_A_b38	rs14235	6.6e-05	0.2	Colon - Transverse
PD	ENSG00000278922.1	AC002310.14	chr16_31110472_G_A_b38	rs14235	0.00015	-0.15	Colon - Transverse
PD	ENSG00000103510.19	KAT8	chr16_31110472_G_A_b38	rs14235	4e-23	-0.38	Esophagus - Gastroesophageal Junction
PD	ENSG00000260911.2	RP11-196G11.2	chr16_31110472_G_A_b38	rs14235	2.4e-06	-0.24	Esophagus - Gastroesophageal Junction
PD	ENSG00000099381.17	SETD1A	chr16_31110472_G_A_b38	rs14235	1.7e-05	-0.11	Esophagus - Gastroesophageal Junction
PD	ENSG00000103510.19	KAT8	chr16_31110472_G_A_b38	rs14235	3.9e-31	-0.37	Esophagus - Mucosa
PD	ENSG00000099377.13	HSD3B7	chr16_31110472_G_A_b38	rs14235	1.3e-15	-0.27	Esophagus - Mucosa
PD	ENSG00000103507.13	BCKDK	chr16_31110472_G_A_b38	rs14235	1.2e-10	0.2	Esophagus - Mucosa
PD	ENSG00000260911.2	RP11-196G11.2	chr16_31110472_G_A_b38	rs14235	6.1e-07	-0.23	Esophagus - Mucosa
PD	ENSG00000278922.1	AC002310.14	chr16_31110472_G_A_b38	rs14235	3e-06	-0.2	Esophagus - Mucosa
PD	ENSG00000167394.12	ZNF668	chr16_31110472_G_A_b38	rs14235	3.2e-06	0.2	Esophagus - Mucosa
PD	ENSG00000099365.10	STX1B	chr16_31110472_G_A_b38	rs14235	5.1e-06	-0.15	Esophagus - Mucosa
PD	ENSG00000232748.3	RP11-196G11.6	chr16_31110472_G_A_b38	rs14235	0.00029	0.21	Esophagus - Mucosa
PD	ENSG00000103510.19	KAT8	chr16_31110472_G_A_b38	rs14235	1.8e-24	-0.31	Esophagus - Muscularis
PD	ENSG00000260911.2	RP11-196G11.2	chr16_31110472_G_A_b38	rs14235	3.2e-11	-0.3	Esophagus - Muscularis
PD	ENSG00000260304.1	RP11-388M20.6	chr16_31110472_G_A_b38	rs14235	8e-07	0.23	Esophagus - Muscularis
PD	ENSG00000103510.19	KAT8	chr16_31110472_G_A_b38	rs14235	1.3e-21	-0.35	Heart - Atrial Appendage
PD	ENSG00000167397.14	VKORC1	chr16_31110472_G_A_b38	rs14235	1e-08	0.15	Heart - Atrial Appendage
PD	ENSG00000278922.1	AC002310.14	chr16_31110472_G_A_b38	rs14235	1.7e-05	-0.21	Heart - Atrial Appendage
PD	ENSG00000278133.1	RP11-196G11.5	chr16_31110472_G_A_b38	rs14235	2.3e-05	-0.19	Heart - Atrial Appendage
PD	ENSG00000103510.19	KAT8	chr16_31110472_G_A_b38	rs14235	1.8e-18	-0.32	Heart - Left Ventricle
PD	ENSG00000167397.14	VKORC1	chr16_31110472_G_A_b38	rs14235	2e-11	0.18	Heart - Left Ventricle
PD	ENSG00000260911.2	RP11-196G11.2	chr16_31110472_G_A_b38	rs14235	4.1e-06	-0.22	Heart - Left Ventricle
PD	ENSG00000099377.13	HSD3B7	chr16_31110472_G_A_b38	rs14235	5.2e-05	-0.14	Heart - Left Ventricle
PD	ENSG00000151006.7	PRSS53	chr16_31110472_G_A_b38	rs14235	5.2e-05	0.14	Heart - Left Ventricle
PD	ENSG00000278922.1	AC002310.14	chr16_31110472_G_A_b38	rs14235	0.00011	-0.16	Heart - Left Ventricle
PD	ENSG00000167397.14	VKORC1	chr16_31110472_G_A_b38	rs14235	8.4e-44	-0.94	Liver
PD	ENSG00000151006.7	PRSS53	chr16_31110472_G_A_b38	rs14235	4e-29	-0.65	Liver
PD	ENSG00000280160.1	RP11-196G11.3	chr16_31110472_G_A_b38	rs14235	2.5e-15	-0.69	Liver
PD	ENSG00000232748.3	RP11-196G11.6	chr16_31110472_G_A_b38	rs14235	7.5e-09	0.49	Liver
PD	ENSG00000103510.19	KAT8	chr16_31110472_G_A_b38	rs14235	3.5e-08	-0.3	Liver
PD	ENSG00000167395.10	ZNF646	chr16_31110472_G_A_b38	rs14235	1e-07	-0.3	Liver
PD	ENSG00000103510.19	KAT8	chr16_31110472_G_A_b38	rs14235	1.3e-26	-0.3	Lung
PD	ENSG00000260911.2	RP11-196G11.2	chr16_31110472_G_A_b38	rs14235	8.6e-13	-0.31	Lung
PD	ENSG00000167397.14	VKORC1	chr16_31110472_G_A_b38	rs14235	1.6e-05	0.098	Lung
PD	ENSG00000167394.12	ZNF668	chr16_31110472_G_A_b38	rs14235	2.7e-05	0.15	Lung
PD	ENSG00000099381.17	SETD1A	chr16_31110472_G_A_b38	rs14235	0.00012	-0.076	Lung
PD	ENSG00000103510.19	KAT8	chr16_31110472_G_A_b38	rs14235	1.2e-06	-0.35	Minor Salivary Gland
PD	ENSG00000103510.19	KAT8	chr16_31110472_G_A_b38	rs14235	3e-23	-0.24	Muscle - Skeletal
PD	ENSG00000099377.13	HSD3B7	chr16_31110472_G_A_b38	rs14235	6.9e-17	-0.28	Muscle - Skeletal
PD	ENSG00000260911.2	RP11-196G11.2	chr16_31110472_G_A_b38	rs14235	2.5e-12	-0.26	Muscle - Skeletal
PD	ENSG00000167397.14	VKORC1	chr16_31110472_G_A_b38	rs14235	5.4e-11	0.18	Muscle - Skeletal
PD	ENSG00000278922.1	AC002310.14	chr16_31110472_G_A_b38	rs14235	5e-07	-0.15	Muscle - Skeletal
PD	ENSG00000167395.10	ZNF646	chr16_31110472_G_A_b38	rs14235	7.4e-06	-0.09	Muscle - Skeletal
PD	ENSG00000103496.14	STX4	chr16_31110472_G_A_b38	rs14235	8.3e-06	-0.13	Muscle - Skeletal
PD	ENSG00000099381.17	SETD1A	chr16_31110472_G_A_b38	rs14235	2.4e-05	-0.064	Muscle - Skeletal
PD	ENSG00000103510.19	KAT8	chr16_31110472_G_A_b38	rs14235	1.9e-29	-0.22	Nerve - Tibial
PD	ENSG00000260911.2	RP11-196G11.2	chr16_31110472_G_A_b38	rs14235	1.9e-15	-0.37	Nerve - Tibial
PD	ENSG00000099365.10	STX1B	chr16_31110472_G_A_b38	rs14235	4.4e-08	-0.2	Nerve - Tibial
PD	ENSG00000262766.1	RP11-196G11.4	chr16_31110472_G_A_b38	rs14235	1.7e-05	-0.16	Nerve - Tibial
PD	ENSG00000278922.1	AC002310.14	chr16_31110472_G_A_b38	rs14235	5.4e-05	-0.18	Nerve - Tibial
PD	ENSG00000232748.3	RP11-196G11.6	chr16_31110472_G_A_b38	rs14235	0.00014	0.22	Nerve - Tibial
PD	ENSG00000260304.1	RP11-388M20.6	chr16_31110472_G_A_b38	rs14235	0.00018	0.14	Nerve - Tibial
PD	ENSG00000167397.14	VKORC1	chr16_31110472_G_A_b38	rs14235	0.00027	0.087	Nerve - Tibial
PD	ENSG00000103510.19	KAT8	chr16_31110472_G_A_b38	rs14235	1.3e-09	-0.29	Ovary
PD	ENSG00000103510.19	KAT8	chr16_31110472_G_A_b38	rs14235	1.2e-10	-0.29	Pancreas
PD	ENSG00000099365.10	STX1B	chr16_31110472_G_A_b38	rs14235	2.8e-10	-0.37	Pancreas
PD	ENSG00000232748.3	RP11-196G11.6	chr16_31110472_G_A_b38	rs14235	0.00017	0.3	Pancreas
PD	ENSG00000103510.19	KAT8	chr16_31110472_G_A_b38	rs14235	3.5e-14	-0.44	Pituitary
PD	ENSG00000167397.14	VKORC1	chr16_31110472_G_A_b38	rs14235	1.3e-06	0.21	Pituitary
PD	ENSG00000232748.3	RP11-196G11.6	chr16_31110472_G_A_b38	rs14235	3e-05	0.37	Pituitary
PD	ENSG00000103510.19	KAT8	chr16_31110472_G_A_b38	rs14235	1.1e-07	-0.29	Prostate
PD	ENSG00000099365.10	STX1B	chr16_31110472_G_A_b38	rs14235	1.3e-06	-0.28	Prostate
PD	ENSG00000099377.13	HSD3B7	chr16_31110472_G_A_b38	rs14235	4.3e-05	-0.2	Prostate
PD	ENSG00000103510.19	KAT8	chr16_31110472_G_A_b38	rs14235	1.8e-47	-0.4	Skin - Not Sun Exposed (Suprapubic)
PD	ENSG00000099377.13	HSD3B7	chr16_31110472_G_A_b38	rs14235	3e-14	-0.26	Skin - Not Sun Exposed (Suprapubic)
PD	ENSG00000260911.2	RP11-196G11.2	chr16_31110472_G_A_b38	rs14235	1.7e-13	-0.36	Skin - Not Sun Exposed (Suprapubic)
PD	ENSG00000167395.10	ZNF646	chr16_31110472_G_A_b38	rs14235	9e-09	-0.16	Skin - Not Sun Exposed (Suprapubic)
PD	ENSG00000167397.14	VKORC1	chr16_31110472_G_A_b38	rs14235	5.2e-06	-0.12	Skin - Not Sun Exposed (Suprapubic)
PD	ENSG00000178226.10	PRSS36	chr16_31110472_G_A_b38	rs14235	4.5e-05	-0.13	Skin - Not Sun Exposed (Suprapubic)
PD	ENSG00000167394.12	ZNF668	chr16_31110472_G_A_b38	rs14235	6.3e-05	0.13	Skin - Not Sun Exposed (Suprapubic)
PD	ENSG00000099365.10	STX1B	chr16_31110472_G_A_b38	rs14235	0.00022	-0.1	Skin - Not Sun Exposed (Suprapubic)
PD	ENSG00000103510.19	KAT8	chr16_31110472_G_A_b38	rs14235	2.4e-59	-0.46	Skin - Sun Exposed (Lower leg)
PD	ENSG00000099377.13	HSD3B7	chr16_31110472_G_A_b38	rs14235	3.9e-17	-0.26	Skin - Sun Exposed (Lower leg)
PD	ENSG00000260911.2	RP11-196G11.2	chr16_31110472_G_A_b38	rs14235	4e-12	-0.32	Skin - Sun Exposed (Lower leg)
PD	ENSG00000167395.10	ZNF646	chr16_31110472_G_A_b38	rs14235	4.2e-09	-0.15	Skin - Sun Exposed (Lower leg)
PD	ENSG00000167394.12	ZNF668	chr16_31110472_G_A_b38	rs14235	1.9e-07	0.16	Skin - Sun Exposed (Lower leg)
PD	ENSG00000167397.14	VKORC1	chr16_31110472_G_A_b38	rs14235	5.6e-06	-0.1	Skin - Sun Exposed (Lower leg)
PD	ENSG00000103507.13	BCKDK	chr16_31110472_G_A_b38	rs14235	0.00018	0.063	Skin - Sun Exposed (Lower leg)
PD	ENSG00000167397.14	VKORC1	chr16_31110472_G_A_b38	rs14235	3.7e-12	-0.51	Small Intestine - Terminal Ileum
PD	ENSG00000151006.7	PRSS53	chr16_31110472_G_A_b38	rs14235	4.9e-09	-0.47	Small Intestine - Terminal Ileum
PD	ENSG00000103510.19	KAT8	chr16_31110472_G_A_b38	rs14235	1.9e-05	-0.26	Small Intestine - Terminal Ileum
PD	ENSG00000099377.13	HSD3B7	chr16_31110472_G_A_b38	rs14235	7.9e-05	-0.22	Small Intestine - Terminal Ileum
PD	ENSG00000260911.2	RP11-196G11.2	chr16_31110472_G_A_b38	rs14235	2.4e-09	-0.38	Spleen
PD	ENSG00000103510.19	KAT8	chr16_31110472_G_A_b38	rs14235	3.1e-08	-0.24	Spleen
PD	ENSG00000167397.14	VKORC1	chr16_31110472_G_A_b38	rs14235	9.9e-05	0.17	Spleen
PD	ENSG00000099381.17	SETD1A	chr16_31110472_G_A_b38	rs14235	0.00014	-0.18	Spleen
PD	ENSG00000103510.19	KAT8	chr16_31110472_G_A_b38	rs14235	1.5e-19	-0.34	Stomach
PD	ENSG00000260911.2	RP11-196G11.2	chr16_31110472_G_A_b38	rs14235	5.9e-07	-0.27	Stomach
PD	ENSG00000278922.1	AC002310.14	chr16_31110472_G_A_b38	rs14235	1.4e-06	-0.23	Stomach
PD	ENSG00000099365.10	STX1B	chr16_31110472_G_A_b38	rs14235	4.5e-06	-0.18	Stomach
PD	ENSG00000167397.14	VKORC1	chr16_31110472_G_A_b38	rs14235	2.5e-11	0.3	Testis
PD	ENSG00000260911.2	RP11-196G11.2	chr16_31110472_G_A_b38	rs14235	3.5e-08	-0.34	Testis
PD	ENSG00000099365.10	STX1B	chr16_31110472_G_A_b38	rs14235	4.5e-08	-0.28	Testis
PD	ENSG00000103510.19	KAT8	chr16_31110472_G_A_b38	rs14235	1.4e-07	-0.28	Testis
PD	ENSG00000278922.1	AC002310.14	chr16_31110472_G_A_b38	rs14235	3.9e-06	0.15	Testis
PD	ENSG00000275263.1	RP11-1072A3.4	chr16_31110472_G_A_b38	rs14235	0.00014	0.32	Testis
PD	ENSG00000103510.19	KAT8	chr16_31110472_G_A_b38	rs14235	8.2e-39	-0.33	Thyroid
PD	ENSG00000099365.10	STX1B	chr16_31110472_G_A_b38	rs14235	2.6e-14	-0.31	Thyroid
PD	ENSG00000196118.11	CCDC189	chr16_31110472_G_A_b38	rs14235	8.1e-13	0.25	Thyroid
PD	ENSG00000099377.13	HSD3B7	chr16_31110472_G_A_b38	rs14235	1.8e-09	-0.2	Thyroid
PD	ENSG00000260911.2	RP11-196G11.2	chr16_31110472_G_A_b38	rs14235	2.9e-09	-0.22	Thyroid
PD	ENSG00000167394.12	ZNF668	chr16_31110472_G_A_b38	rs14235	3.3e-07	0.19	Thyroid
PD	ENSG00000232748.3	RP11-196G11.6	chr16_31110472_G_A_b38	rs14235	0.00019	0.19	Thyroid
PD	ENSG00000260911.2	RP11-196G11.2	chr16_31110472_G_A_b38	rs14235	2.9e-06	-0.4	Uterus
PD	ENSG00000103510.19	KAT8	chr16_31110472_G_A_b38	rs14235	3e-08	-0.37	Vagina
PD	ENSG00000167394.12	ZNF668	chr16_31110472_G_A_b38	rs14235	4.6e-20	0.31	Whole Blood
PD	ENSG00000103507.13	BCKDK	chr16_31110472_G_A_b38	rs14235	2.8e-13	0.11	Whole Blood
PD	ENSG00000260911.2	RP11-196G11.2	chr16_31110472_G_A_b38	rs14235	4.5e-12	-0.22	Whole Blood
PD	ENSG00000099377.13	HSD3B7	chr16_31110472_G_A_b38	rs14235	9.9e-12	0.16	Whole Blood
PD	ENSG00000167397.14	VKORC1	chr16_31110472_G_A_b38	rs14235	1.5e-08	0.11	Whole Blood
PD	ENSG00000262766.1	RP11-196G11.4	chr16_31110472_G_A_b38	rs14235	4.5e-06	-0.12	Whole Blood
PD	ENSG00000279196.1	RP11-1072A3.3	chr16_31110472_G_A_b38	rs14235	2.9e-05	0.17	Whole Blood
PD	ENSG00000103510.19	KAT8	chr16_31110472_G_A_b38	rs14235	7.1e-05	-0.059	Whole Blood
PD	ENSG00000099365.10	STX1B	chr16_31110472_G_A_b38	rs14235	0.00014	0.16	Whole Blood
PD	ENSG00000278922.1	AC002310.14	chr16_31110472_G_A_b38	rs14235	0.00015	-0.16	Whole Blood
PD	ENSG00000204650.14	LINC02210	chr17_46111701_A_G_b38	rs7225002	1.6e-51	0.73	Adipose - Subcutaneous
PD	ENSG00000176681.14	LRRC37A	chr17_46111701_A_G_b38	rs7225002	1.5e-49	0.77	Adipose - Subcutaneous
PD	ENSG00000214425.7	LRRC37A4P	chr17_46111701_A_G_b38	rs7225002	2e-46	-0.65	Adipose - Subcutaneous
PD	ENSG00000238083.7	LRRC37A2	chr17_46111701_A_G_b38	rs7225002	5.4e-38	0.64	Adipose - Subcutaneous
PD	ENSG00000264070.1	DND1P1	chr17_46111701_A_G_b38	rs7225002	2.4e-34	0.71	Adipose - Subcutaneous
PD	ENSG00000262539.1	RP11-259G18.3	chr17_46111701_A_G_b38	rs7225002	1.4e-33	0.64	Adipose - Subcutaneous
PD	ENSG00000263503.1	MAPK8IP1P2	chr17_46111701_A_G_b38	rs7225002	1.5e-32	0.61	Adipose - Subcutaneous
PD	ENSG00000214401.4	KANSL1-AS1	chr17_46111701_A_G_b38	rs7225002	3.9e-26	0.56	Adipose - Subcutaneous
PD	ENSG00000280022.1	RP11-707O23.1	chr17_46111701_A_G_b38	rs7225002	6.2e-25	0.58	Adipose - Subcutaneous
PD	ENSG00000260075.1	NSFP1	chr17_46111701_A_G_b38	rs7225002	4.1e-19	0.52	Adipose - Subcutaneous
PD	ENSG00000120088.14	CRHR1	chr17_46111701_A_G_b38	rs7225002	2.3e-08	0.28	Adipose - Subcutaneous
PD	ENSG00000261575.2	RP11-259G18.1	chr17_46111701_A_G_b38	rs7225002	3.8e-07	0.26	Adipose - Subcutaneous
PD	ENSG00000225190.10	PLEKHM1	chr17_46111701_A_G_b38	rs7225002	1.1e-06	0.12	Adipose - Subcutaneous
PD	ENSG00000108379.9	WNT3	chr17_46111701_A_G_b38	rs7225002	6.7e-06	0.21	Adipose - Subcutaneous
PD	ENSG00000186868.15	MAPT	chr17_46111701_A_G_b38	rs7225002	1.6e-05	0.11	Adipose - Subcutaneous
PD	ENSG00000267198.1	RP11-798G7.6	chr17_46111701_A_G_b38	rs7225002	4.8e-05	-0.25	Adipose - Subcutaneous
PD	ENSG00000176681.14	LRRC37A	chr17_46111701_A_G_b38	rs7225002	7.3e-46	0.69	Adipose - Visceral (Omentum)
PD	ENSG00000214425.7	LRRC37A4P	chr17_46111701_A_G_b38	rs7225002	1.9e-35	-0.65	Adipose - Visceral (Omentum)
PD	ENSG00000204650.14	LINC02210	chr17_46111701_A_G_b38	rs7225002	6.9e-35	0.54	Adipose - Visceral (Omentum)
PD	ENSG00000263503.1	MAPK8IP1P2	chr17_46111701_A_G_b38	rs7225002	6.4e-26	0.61	Adipose - Visceral (Omentum)
PD	ENSG00000262539.1	RP11-259G18.3	chr17_46111701_A_G_b38	rs7225002	3.5e-25	0.62	Adipose - Visceral (Omentum)
PD	ENSG00000238083.7	LRRC37A2	chr17_46111701_A_G_b38	rs7225002	4.6e-23	0.48	Adipose - Visceral (Omentum)
PD	ENSG00000214401.4	KANSL1-AS1	chr17_46111701_A_G_b38	rs7225002	3e-22	0.57	Adipose - Visceral (Omentum)
PD	ENSG00000262500.1	MAPK8IP1P1	chr17_46111701_A_G_b38	rs7225002	2.6e-21	0.51	Adipose - Visceral (Omentum)
PD	ENSG00000264070.1	DND1P1	chr17_46111701_A_G_b38	rs7225002	8.3e-21	0.62	Adipose - Visceral (Omentum)
PD	ENSG00000280022.1	RP11-707O23.1	chr17_46111701_A_G_b38	rs7225002	1.9e-20	0.56	Adipose - Visceral (Omentum)
PD	ENSG00000260075.1	NSFP1	chr17_46111701_A_G_b38	rs7225002	1.9e-16	0.54	Adipose - Visceral (Omentum)
PD	ENSG00000228696.8	ARL17B	chr17_46111701_A_G_b38	rs7225002	2.4e-07	0.33	Adipose - Visceral (Omentum)
PD	ENSG00000120088.14	CRHR1	chr17_46111701_A_G_b38	rs7225002	2.4e-06	0.22	Adipose - Visceral (Omentum)
PD	ENSG00000186868.15	MAPT	chr17_46111701_A_G_b38	rs7225002	6.5e-05	0.12	Adipose - Visceral (Omentum)
PD	ENSG00000238083.7	LRRC37A2	chr17_46111701_A_G_b38	rs7225002	1.2e-24	0.81	Adrenal Gland
PD	ENSG00000204650.14	LINC02210	chr17_46111701_A_G_b38	rs7225002	2.4e-23	0.75	Adrenal Gland
PD	ENSG00000262539.1	RP11-259G18.3	chr17_46111701_A_G_b38	rs7225002	3.6e-17	0.75	Adrenal Gland
PD	ENSG00000280022.1	RP11-707O23.1	chr17_46111701_A_G_b38	rs7225002	9.8e-17	0.74	Adrenal Gland
PD	ENSG00000264070.1	DND1P1	chr17_46111701_A_G_b38	rs7225002	1.7e-16	0.75	Adrenal Gland
PD	ENSG00000176681.14	LRRC37A	chr17_46111701_A_G_b38	rs7225002	4.6e-16	0.73	Adrenal Gland
PD	ENSG00000263503.1	MAPK8IP1P2	chr17_46111701_A_G_b38	rs7225002	1.5e-14	0.71	Adrenal Gland
PD	ENSG00000214425.7	LRRC37A4P	chr17_46111701_A_G_b38	rs7225002	2.2e-14	-0.65	Adrenal Gland
PD	ENSG00000214401.4	KANSL1-AS1	chr17_46111701_A_G_b38	rs7225002	1.8e-11	0.62	Adrenal Gland
PD	ENSG00000262500.1	MAPK8IP1P1	chr17_46111701_A_G_b38	rs7225002	4.7e-10	0.54	Adrenal Gland
PD	ENSG00000260075.1	NSFP1	chr17_46111701_A_G_b38	rs7225002	2e-07	0.48	Adrenal Gland
PD	ENSG00000185829.17	ARL17A	chr17_46111701_A_G_b38	rs7225002	8.7e-05	0.37	Adrenal Gland
[truncated: 6,438 more rows]
