# Supplementary material for: A hidden layer of structural variation in transposable elements reveals potential genetic modifiers in human disease-risk loci
Source: HighWire-hosted journal article supplement (doi:10.1101/gr.275515.121), 2022-03-24
Supplement: Supplemental_Table_S3.xlsx [file Supplemental_Table_S3.xlsx]

## Sheet: README
Supplemental Table S3: DESeq2 results for BCKDK- and BIN1-SVA KO.
DESeq2 results for RNA- and ChIP-seq (H3K27ac and H3K4me3) of WT vs BCKDK- or BIN1-SVA KO cortical organoids.
The table below indicates figures that the other tabs are corresponding to.
tab name	Figure
DESeq2_BCKDK-SVA-KO_H3K4me3	6b
DESeq2_BCKDK-SVA-KO_H3K27ac	6c
DESeq2_BIN1-SVA-KO_H3K4me3	S6b,c
DESeq2_BIN1-SVA-KO_H3K27ac	S6b,c
DESeq2_BCKDK-SVA-KO_NCBIrefSeq	6d
DESeq2_BIN1-SVA-KO_NCBIrefSeq	S6b,c

## Sheet: DESeq2_BCKDK-SVA-KO_H3K4me3
Peak location	base mean	log2FC	StdErr	Wald-Stats	P-value	Padj
chr5:178939742-178941971	74.5794	3.34033	0.283497	11.7826	4.79836e-32	1.38639e-27
chr15:45703913-45706263	131.133	2.45632	0.225044	10.9149	9.78795e-28	1.41402e-23
chr11:34437806-34441030	230.636	2.53175	0.233772	10.83	2.48247e-27	2.39086e-23
chr5:150901615-150906290	280.456	1.71178	0.226746	7.54936	4.37399e-14	3.15944e-10
chr19:20036096-20039999	512.778	0.946539	0.139129	6.80332	1.02237e-11	5.90788e-08
chr4:164956217-164959650	410.132	0.993417	0.150474	6.60193	4.05847e-11	1.95435e-07
chr14:22916862-22920094	457.057	0.987494	0.152948	6.4564	1.07221e-10	4.42563e-07
chr19:58439382-58440171	23.0748	2.26136	0.35463	6.37669	1.80959e-10	6.53556e-07
chr2:185424975-185428710	259.031	1.41517	0.229776	6.15893	7.32375e-10	2.35117e-06
chr17:82095544-82100248	520.697	-1.19057	0.200771	-5.92998	3.02969e-09	8.75367e-06
chr5:141390084-141391900	39.2484	2.0082	0.340587	5.89631	3.71729e-09	9.76397e-06
chr5:471324-475722	506.294	-1.06705	0.181935	-5.865	4.49132e-09	1.0814e-05
chr17:82696984-82699882	300.019	-1.13907	0.197853	-5.75715	8.55464e-09	1.9013e-05
chr19:12194558-12196254	43.4775	-1.82634	0.321678	-5.67753	1.36651e-08	2.82019e-05
chr1:122935367-122936210	48.9177	1.76698	0.312778	5.64933	1.61071e-08	2.93818e-05
chr19:57476661-57477977	36.2885	1.88766	0.334241	5.6476	1.62707e-08	2.93818e-05
chr12:132559441-132562847	454.552	-1.07442	0.19215	-5.59155	2.25055e-08	3.825e-05
chr17:81221249-81224082	303.42	-1.06769	0.19211	-5.55772	2.73326e-08	4.38734e-05
chr19:54137626-54139683	310.828	-1.04185	0.188026	-5.54099	3.00773e-08	4.57381e-05
chr12:132142708-132145701	412.724	-1.11511	0.201999	-5.52034	3.38341e-08	4.88784e-05
chr14:44957250-44970763	2710.2	0.826301	0.15048	5.49112	3.99393e-08	5.49508e-05
chr16:69327071-69331744	339.889	-0.964215	0.177799	-5.42307	5.85829e-08	7.6938e-05
chr1:2641686-2644091	306.989	-1.14521	0.212469	-5.39001	7.04553e-08	8.14266e-05
chr22:49959711-49963030	339.158	-1.04027	0.192884	-5.39326	6.91908e-08	8.14266e-05
chr8:144102398-144106101	618.445	-0.95088	0.176014	-5.40229	6.57944e-08	8.14266e-05
chr19:4791555-4793416	291.102	-1.17996	0.220024	-5.36288	8.1905e-08	9.10185e-05
chr22:19176712-19179937	383.591	-1.00995	0.189159	-5.33916	9.33791e-08	9.9926e-05
chr1:65146790-65151077	349.995	-0.946895	0.17779	-5.32593	1.00437e-07	0.000102413
chr2:241733865-241736151	348.926	-1.06502	0.200127	-5.32172	1.02792e-07	0.000102413
chr12:122979240-122982499	527.23	-0.965595	0.18196	-5.30664	1.11664e-07	0.000104074
chr8:142738561-142739810	99.8349	-1.40527	0.264741	-5.30811	1.10769e-07	0.000104074
chr9:137604872-137608053	258.77	-1.05174	0.199406	-5.27438	1.33205e-07	0.000120271
chr2:240434146-240439204	576.61	-0.969801	0.184135	-5.26678	1.38834e-07	0.000121555
chr9:136436288-136440324	511.519	-0.955862	0.181856	-5.25616	1.47092e-07	0.000124998
chr20:63174204-63182027	620.348	-0.920221	0.176065	-5.22659	1.72668e-07	0.00013858
chr22:50304781-50307757	374.418	-1.01376	0.193915	-5.22785	1.71492e-07	0.00013858
chr8:143972904-143977624	360.299	-1.00198	0.191917	-5.22089	1.78062e-07	0.000139047
chr16:1770379-1774935	730.461	-0.96405	0.185448	-5.1985	2.00905e-07	0.00014158
chr16:68444437-68450032	614.712	-0.802488	0.154186	-5.20466	1.94351e-07	0.00014158
chr19:18893815-18896856	381.006	-1.03736	0.199456	-5.20093	1.98298e-07	0.00014158
chr8:144146385-144149614	453.774	-1.03583	0.199045	-5.20403	1.95014e-07	0.00014158
chr11:840633-843736	435.661	-0.917604	0.176988	-5.18455	2.1654e-07	0.000148964
chr1:125079777-125081697	76.1347	1.57048	0.303811	5.16927	2.35014e-07	0.000154324
chr16:3057582-3059894	278.5	-1.06202	0.205434	-5.16964	2.34548e-07	0.000154324
chr17:81550577-81554067	508.986	-1.01128	0.196289	-5.15198	2.57755e-07	0.000165496
chr9:137043868-137047274	409.849	-0.952535	0.185338	-5.13945	2.75537e-07	0.000173067
chr16:89719120-89723760	556.166	-0.92932	0.180981	-5.1349	2.82294e-07	0.000173539
chr11:447630-452223	572.945	-0.880748	0.172699	-5.09989	3.39853e-07	0.000197608
chr16:641253-643349	187.842	-1.06309	0.208504	-5.09866	3.42075e-07	0.000197608
chr16:31107634-31109888	302.56	-1.00207	0.196679	-5.09497	3.48804e-07	0.000197608			#DIV/0!
chr21:43718344-43721436	364.809	-1.01496	0.198975	-5.10091	3.38021e-07	0.000197608
chr19:58466322-58468804	371.452	-0.97376	0.192154	-5.0676	4.02872e-07	0.000222942
chr9:136942940-136945160	197.419	-1.16354	0.229734	-5.06474	4.08955e-07	0.000222942
chr1:1324172-1326564	361.083	-1.08062	0.213653	-5.05783	4.24055e-07	0.000224864
chr2:96866795-96870994	642.701	-0.886322	0.1753	-5.05604	4.28045e-07	0.000224864
chr14:100303731-100308968	773.86	-0.926082	0.184096	-5.03043	4.89374e-07	0.000243784
chr17:4364049-4367353	650.325	-0.786716	0.156322	-5.03267	4.83684e-07	0.000243784
chr17:82228488-82232374	69.6113	-1.47755	0.293633	-5.03195	4.85516e-07	0.000243784
chr1:997573-1002406	658.601	-0.914978	0.182024	-5.02668	4.99056e-07	0.000244394
chr10:116740916-116743396	273.493	-0.99148	0.198437	-4.99644	5.83981e-07	0.000246905
chr11:795794-798942	330.466	-0.99228	0.198722	-4.99331	5.93536e-07	0.000246905
chr11:909369-912051	356.675	-0.994894	0.198629	-5.00881	5.47689e-07	0.000246905
chr12:131827660-131831697	404.287	-0.948437	0.190077	-4.98974	6.04591e-07	0.000246905
chr15:78809542-78812298	348.87	-0.974281	0.194334	-5.01344	5.34645e-07	0.000246905
chr16:648037-650543	355.51	-0.993642	0.198818	-4.99775	5.80031e-07	0.000246905
chr16:787105-789860	362.723	-1.03657	0.206561	-5.01823	5.21498e-07	0.000246905
chr16:2968582-2971327	459.299	-0.973643	0.194933	-4.99476	5.89083e-07	0.000246905
chr17:82021376-82024568	450.93	-1.02758	0.206058	-4.98683	6.13772e-07	0.000246905
chr2:74832739-74843630	562.439	-0.838647	0.167637	-5.00276	5.65139e-07	0.000246905
chr3:195987976-195991308	783.739	-0.866995	0.173873	-4.98636	6.15277e-07	0.000246905
chr8:144357008-144359818	429.467	-1.01183	0.202753	-4.99046	6.02343e-07	0.000246905
chr9:127396199-127398855	356.458	-0.971865	0.194607	-4.99398	5.9149e-07	0.000246905
chr19:1444514-1448014	333.237	-0.948613	0.190439	-4.98118	6.31979e-07	0.000250134
chr1:124530055-124530536	62.9385	1.5955	0.321816	4.95781	7.12922e-07	0.000278357
chr11:73375900-73378170	272.946	-0.95227	0.192232	-4.95376	7.27922e-07	0.000280425
chr1:124307714-124308224	32.7798	1.70071	0.343771	4.94721	7.52838e-07	0.000286025
chrX:109536074-109538422	325.086	0.913978	0.184836	4.94479	7.62258e-07	0.000286025
chr1:1304034-1310109	747.286	-0.913021	0.184916	-4.93748	7.91371e-07	0.000287734
chr4:1719126-1723121	409.881	-0.951893	0.19284	-4.93618	7.9669e-07	0.000287734
chr9:136050256-136053252	286.496	-1.0292	0.208492	-4.93637	7.95903e-07	0.000287734
chr10:75234077-75236409	245.697	-1.09463	0.222253	-4.92517	8.42856e-07	0.000297223
chr20:36572818-36576142	256.934	-1.01476	0.206116	-4.92323	8.51267e-07	0.000297223
chr7:102363008-102366102	489.493	-0.797413	0.161989	-4.92264	8.53823e-07	0.000297223
chr16:4692557-4695076	251.684	-1.02394	0.208327	-4.91507	8.87497e-07	0.000304175
chr20:63739976-63741882	209.368	-1.04228	0.212127	-4.91346	8.9485e-07	0.000304175
chr11:2376837-2379238	374.662	-0.981397	0.200084	-4.90493	9.346e-07	0.00031263
chr17:81926047-81929370	382.939	-0.944113	0.192538	-4.90352	9.41363e-07	0.00031263
chr1:124562012-124562608	60.1365	1.50473	0.308275	4.88111	1.05489e-06	0.000320831
chr10:6199424-6210515	952.268	-0.717197	0.146538	-4.89427	9.86716e-07	0.000320831
chr10:40892027-40892539	60.1424	1.55191	0.317825	4.88291	1.0453e-06	0.000320831
chr10:132185667-132189692	465.378	-0.970834	0.198698	-4.88597	1.02923e-06	0.000320831
chr16:525849-529865	466.659	-0.985769	0.201703	-4.88722	1.02271e-06	0.000320831
chr16:28950103-28952703	322.865	-0.866416	0.17746	-4.88232	1.04846e-06	0.000320831
chr2:134118508-134122894	674.521	-0.769726	0.157512	-4.88679	1.02495e-06	0.000320831
chr20:63706374-63710999	507.772	-0.990177	0.202722	-4.88441	1.0374e-06	0.000320831
chr19:660819-664133	393.428	-0.942932	0.193287	-4.8784	1.06951e-06	0.000321888
chr17:82036313-82038454	248.587	-1.00666	0.206896	-4.86555	1.14142e-06	0.000339989
chr4:1854171-1857861	530.694	-0.815106	0.167796	-4.85773	1.18742e-06	0.00034308
chr5:127028190-127031593	450.625	-0.843896	0.173612	-4.86081	1.16906e-06	0.00034308
chr9:83218892-83220709	195.482	0.914568	0.188205	4.85943	1.17727e-06	0.00034308
chr3:49017234-49023640	1105.84	-0.823997	0.169844	-4.85149	1.22539e-06	0.000350545
chr16:30009539-30012095	156.22	-1.08938	0.225343	-4.83431	1.33606e-06	0.000378459
chr1:1270998-1275052	487.329	-0.891316	0.184557	-4.82948	1.3689e-06	0.000382997
chr1:2585019-2588169	381.646	-0.920283	0.190611	-4.82808	1.37859e-06	0.000382997
chr9:131529805-131532029	286.264	-0.926736	0.192072	-4.82494	1.40048e-06	0.000385371
chr2:22691102-22695497	167.713	0.957027	0.198443	4.82267	1.41646e-06	0.000386092
chr1:123577415-123578374	45.9302	1.55239	0.322188	4.81829	1.44791e-06	0.000387357
chr16:587890-592211	510.994	-0.870265	0.180603	-4.81867	1.44517e-06	0.000387357
chr5:782922-785908	640.222	-0.907817	0.188485	-4.81638	1.46187e-06	0.000387503
chr9:137185741-137190315	617.665	-0.858451	0.178353	-4.81322	1.48517e-06	0.0003901
chr11:535598-538452	199.145	-1.06338	0.221098	-4.80956	1.51265e-06	0.000393738
chr16:88938837-88942821	289.915	-0.930721	0.193647	-4.80627	1.53771e-06	0.000396688
chr17:81237433-81240824	612.376	-0.845386	0.176029	-4.80254	1.56668e-06	0.000397072
chr4:2933007-2936468	434.772	-0.880463	0.183303	-4.80331	1.56065e-06	0.000397072
chr1:123819594-123820782	94.8558	1.38051	0.287757	4.79749	1.60663e-06	0.000401429
chr16:2046438-2049766	548.657	-0.836481	0.174381	-4.79687	1.61166e-06	0.000401429
chr1:123058709-123059118	83.3749	1.39877	0.292042	4.78961	1.67102e-06	0.000410815
chr8:143245824-143248423	278.908	-0.921493	0.192427	-4.7888	1.67778e-06	0.000410815
chr1:2411469-2413887	294.25	-1.03766	0.216904	-4.78395	1.71883e-06	0.000417329
chr5:179820267-179823196	426.996	-0.844864	0.177057	-4.77171	1.82668e-06	0.00043982
chr1:124700351-124701601	81.697	1.47424	0.309374	4.76525	1.88621e-06	0.000446708
chr11:64164827-64167208	257.899	-0.933394	0.195815	-4.76671	1.87255e-06	0.000446708
chr1:1032776-1035760	189.941	-1.01914	0.214067	-4.76084	1.92786e-06	0.000451141
chr16:978397-985012	590.426	-0.86521	0.181768	-4.75998	1.93616e-06	0.000451141
chr22:38201433-38203802	216.836	-0.978347	0.206046	-4.74819	2.05245e-06	0.000474411
chr22:23893376-23896502	406.791	-0.894333	0.188509	-4.74424	2.09292e-06	0.000479926
chr8:144790629-144794225	504.623	-0.932717	0.19707	-4.73292	2.21315e-06	0.000503501
chr17:82645676-82649330	580.128	-0.7627	0.161455	-4.72391	2.31357e-06	0.000522234
chr8:144477195-144479687	388.598	-0.838568	0.177579	-4.72223	2.33275e-06	0.000522481
chr19:47607231-47611575	676.86	-0.77987	0.165325	-4.71719	2.3912e-06	0.000531452
chr2:231705307-231714218	1532.38	-0.695871	0.147581	-4.71518	2.41495e-06	0.000532635
chr20:63651023-63654726	467.737	-0.920397	0.19533	-4.71201	2.45291e-06	0.000536909
chr3:126983368-126985846	280.827	-1.00844	0.214122	-4.70966	2.48133e-06	0.000539046
chr17:1724001-1725872	174.291	-1.07834	0.22904	-4.70806	2.5008e-06	0.000539221
chr1:2073172-2076357	357.26	-0.902849	0.191897	-4.70485	2.54054e-06	0.000539733
chr7:1502654-1505447	461.552	-0.838354	0.178151	-4.70586	2.52793e-06	0.000539733
chr16:2979307-2981215	203.219	-1.08858	0.231696	-4.69829	2.62345e-06	0.00054927
chr8:27107553-27109505	50.7499	1.41161	0.300427	4.6987	2.61822e-06	0.00054927
chr2:240817121-240821939	544.089	-0.888684	0.189382	-4.69256	2.69809e-06	0.000560835
chr16:14911891-14912439	163.015	-1.02419	0.218567	-4.68596	2.78656e-06	0.000575086
chr1:124437256-124437776	41.2793	1.52648	0.326314	4.67794	2.89766e-06	0.000593773
chr8:142725946-142729634	332.746	-0.959077	0.205254	-4.67263	2.9737e-06	0.000605064
chr3:127588529-127591962	472.173	-0.884141	0.189398	-4.66817	3.03901e-06	0.000609765
chrX:109726932-109734379	1004.27	0.680237	0.145677	4.66949	3.01947e-06	0.000609765
chr17:77372504-77375607	202.468	-1.05602	0.226427	-4.66386	3.10332e-06	0.000609961
chr19:530482-534368	688.804	-0.840402	0.18009	-4.66656	3.06279e-06	0.000609961
chr20:38925810-38929071	349.496	-0.844807	0.181138	-4.66389	3.10281e-06	0.000609961
chr7:1025714-1029816	421.147	-0.795714	0.170671	-4.66226	3.12752e-06	0.000610565
chr16:667617-669553	256.604	-1.06875	0.229471	-4.65746	3.20136e-06	0.000620785
chr11:49208166-49208919	14.3521	1.65804	0.356462	4.65138	3.29721e-06	0.000635109
chr19:487832-490569	353.747	-0.915822	0.197051	-4.64763	3.35772e-06	0.000642481
chr1:25818721-25822067	628.667	-0.750653	0.161662	-4.64335	3.42812e-06	0.000643922
chr1:81305010-81311303	539.569	0.909368	0.195853	4.64311	3.43211e-06	0.000643922
chr19:10501117-10503942	402.391	-0.899451	0.193658	-4.64453	3.40843e-06	0.000643922
chr19:1235655-1239082	309.498	-0.979164	0.211198	-4.63624	3.54812e-06	0.000657152
chr21:32411306-32413813	261.289	-0.952369	0.205374	-4.63724	3.53092e-06	0.000657152
chr5:75051806-75054995	389.465	-0.819399	0.176809	-4.63437	3.5803e-06	0.000658889
chr1:122528351-122528925	63.451	1.47571	0.319341	4.62111	3.81684e-06	0.000664177
chr1:123433200-123434319	121.003	1.31702	0.285714	4.60957	4.03498e-06	0.000664177
chr1:124004890-124006287	55.5083	1.44539	0.312669	4.62275	3.78687e-06	0.000664177
chr10:133087237-133090570	254.086	-0.894546	0.19408	-4.60915	4.04319e-06	0.000664177
chr11:533809-535302	200.413	-1.02562	0.222213	-4.6155	3.9215e-06	0.000664177
chr12:6531460-6537952	810.367	-0.764184	0.165656	-4.61308	3.96737e-06	0.000664177
chr14:104751899-104755251	466.293	-0.876532	0.190128	-4.61023	4.02222e-06	0.000664177
chr14:105473033-105477566	477.069	-0.885701	0.19137	-4.62821	3.68843e-06	0.000664177
chr15:20308552-20310116	45.6055	1.58576	0.344174	4.60745	4.07647e-06	0.000664177
chr16:2266016-2270348	706.908	-0.78204	0.169763	-4.60667	4.09177e-06	0.000664177
chr19:1247895-1253571	635.895	-0.885509	0.19174	-4.61827	3.86951e-06	0.000664177
chr19:2268512-2274545	698.471	-0.817093	0.177361	-4.60695	4.08617e-06	0.000664177
chr19:38402398-38404898	279.474	-0.841261	0.182529	-4.60892	4.04766e-06	0.000664177
chr22:50199332-50203093	404.926	-0.815069	0.176498	-4.618	3.87458e-06	0.000664177
chr3:159068094-159073111	439.088	0.924738	0.200183	4.61947	3.84731e-06	0.000664177
chr4:705262-711534	511.237	-0.759116	0.164342	-4.61913	3.85344e-06	0.000664177
chr4:1246246-1251474	544.237	-0.837533	0.181364	-4.61797	3.87512e-06	0.000664177
chr5:139903209-139904969	168.294	-1.03632	0.224424	-4.61768	3.88053e-06	0.000664177
chr7:75525867-75528938	520.936	-0.7307	0.158425	-4.61226	3.98311e-06	0.000664177
chr7:76461645-76462119	64.9072	-1.31119	0.28362	-4.62307	3.78109e-06	0.000664177
chrX:139639981-139643454	309.245	0.967134	0.209732	4.61128	4.0019e-06	0.000664177
chr2:241700725-241703786	358.812	-0.956876	0.207845	-4.60379	4.14862e-06	0.000665922
chr7:98877620-98880686	457.402	-0.7797	0.169353	-4.60399	4.14472e-06	0.000665922
chr1:148679304-148679943	117.658	-1.11787	0.243709	-4.58689	4.49903e-06	0.000710516
chr19:707972-711990	381.686	-0.891627	0.194388	-4.58683	4.5002e-06	0.000710516
chr19:27348638-27351935	66.6217	1.47117	0.320657	4.58799	4.47539e-06	0.000710516
chr17:3891640-3893931	238.14	-1.05429	0.230397	-4.57598	4.74004e-06	0.00074032
chr21:42008056-42011814	605.414	-0.764844	0.167144	-4.57597	4.74022e-06	0.00074032
chr12:131949296-131952648	485.015	-0.738894	0.161768	-4.56762	4.93303e-06	0.000754128
chr13:17028016-17029534	59.6741	1.38481	0.303165	4.56784	4.92768e-06	0.000754128
chr14:103714103-103717802	453.407	-0.758303	0.165899	-4.57088	4.85669e-06	0.000754128
chr8:143266411-143269100	379.301	-0.877523	0.192079	-4.56855	4.91105e-06	0.000754128
chr11:66841824-66845059	602.692	-0.748302	0.164045	-4.56157	5.07722e-06	0.000768042
chr22:19985246-19987597	253.26	-0.974729	0.213661	-4.56203	5.06622e-06	0.000768042
chr1:122615264-122616160	67.6984	1.44286	0.316526	4.55843	5.15362e-06	0.000771521
chr14:68976629-68980523	532.489	-0.846901	0.185752	-4.55932	5.13197e-06	0.000771521
chr11:63985180-63988023	476.851	-0.782238	0.171718	-4.55535	5.22974e-06	0.00077888
chr16:4475671-4478367	359.062	-0.862929	0.18948	-4.55419	5.25891e-06	0.000779208
chr21:8230264-8230909	152.543	1.19908	0.263451	4.55143	5.32834e-06	0.000783735
chr4:49122255-49124069	83.5298	1.25421	0.275601	4.55082	5.34371e-06	0.000783735
chr15:89749702-89751716	193.038	-0.993407	0.218617	-4.54405	5.51846e-06	0.000805277
chr21:8993064-8995311	69.451	1.46098	0.321671	4.54185	5.57624e-06	0.00080962
chr1:123070602-123070993	128.748	1.30104	0.28703	4.53278	5.82124e-06	0.000836284
chr14:103518963-103523837	542.308	-0.870341	0.19205	-4.53186	5.84672e-06	0.000836284
chr22:19170573-19173384	519.494	-0.824482	0.181922	-4.53207	5.84076e-06	0.000836284
chr1:124617217-124617647	54.8754	1.44273	0.318714	4.52671	5.99096e-06	0.000852694
chr19:34364369-34372489	475.422	-0.717935	0.158881	-4.51869	6.22235e-06	0.000881286
chr9:136398400-136400706	298.336	-0.979617	0.21689	-4.51665	6.28262e-06	0.000885482
chr12:8389588-8390956	113.306	-1.1736	0.259967	-4.51443	6.34886e-06	0.000890474
chr7:6636380-6639511	326.683	-0.909875	0.201646	-4.51223	6.41493e-06	0.000891089
chr9:136117182-136120424	417.818	-0.865553	0.191784	-4.51317	6.3866e-06	0.000891089
chr1:228101487-228104553	331.741	-0.89474	0.198397	-4.50984	6.48775e-06	0.000896727
chr16:703402-707407	307.019	-0.891356	0.19769	-4.50886	6.51759e-06	0.000896727
chr8:144516651-144519459	346.83	-0.920784	0.204275	-4.50757	6.55732e-06	0.000897918
chr1:149390132-149391098	137.503	-1.03795	0.230454	-4.50395	6.67016e-06	0.000909061
chr16:67652410-67654878	205.198	-0.941659	0.209121	-4.50294	6.70212e-06	0.000909128
chr1:37028470-37036717	603.219	-0.764442	0.169962	-4.49773	6.86832e-06	0.000913867
chr20:26917682-26918317	44.9671	1.4399	0.320167	4.49736	6.88019e-06	0.000913867
chr20:63518339-63523826	611.503	-0.824287	0.18323	-4.49864	6.83903e-06	0.000913867
chr22:46249204-46252152	329.16	-0.83424	0.18538	-4.50015	6.79059e-06	0.000913867
chr6:43769282-43779047	819.241	-0.780192	0.173496	-4.4969	6.8952e-06	0.000913867
chr1:226082767-226084402	174.192	-0.999932	0.222436	-4.49537	6.94481e-06	0.000916239
chr19:18519871-18523049	462.81	-0.765875	0.170472	-4.49267	7.03362e-06	0.000923738
chr19:2454969-2457740	335.501	-0.87221	0.194219	-4.49086	7.0935e-06	0.000927387
chr2:240565991-240570460	339.764	-0.823446	0.183462	-4.48838	7.17681e-06	0.000930766
chr22:43923157-43926473	400.279	-0.856908	0.190926	-4.48817	7.18377e-06	0.000930766
chr18:79949212-79953477	469.483	-0.817903	0.182313	-4.48625	7.24885e-06	0.0009319
chr8:144332050-144339243	756.351	-0.752493	0.167742	-4.48601	7.25704e-06	0.0009319
chr12:57841031-57847596	898.274	-0.730957	0.163016	-4.48397	7.32668e-06	0.000934953
chr5:95283105-95286003	428.362	-0.866703	0.193313	-4.48342	7.34553e-06	0.000934953
chr12:43549432-43552994	361.702	-0.763432	0.170449	-4.47896	7.5008e-06	0.000949628
chr7:190860-196353	606.716	-0.730711	0.16317	-4.47823	7.52656e-06	0.000949628
chr19:29523983-29529469	434.122	-0.858889	0.191961	-4.47429	7.66674e-06	0.000963109
chr11:54021054-54021390	45.12	1.51439	0.338701	4.47117	7.77933e-06	0.000973023
chr19:2049201-2051932	281.387	-0.949892	0.212517	-4.46972	7.8323e-06	0.000975425
chr15:74614184-74618480	782.546	-0.731968	0.163858	-4.46708	7.92928e-06	0.000977191
chr17:76867624-76871323	362.27	-0.819468	0.183504	-4.46567	7.98176e-06	0.000977191
chr20:62301957-62305072	382.95	-0.814949	0.18248	-4.46597	7.97055e-06	0.000977191
chr5:178728580-178731178	279.734	-0.853606	0.191143	-4.4658	7.97699e-06	0.000977191
chr20:63468468-63472616	460.324	-0.956395	0.21427	-4.4635	8.06317e-06	0.000982993
chr19:3555688-3558680	283.924	-0.929496	0.208397	-4.46021	8.18787e-06	0.000994
chr16:2512741-2516502	448.159	-0.765884	0.171938	-4.45441	8.41224e-06	0.00101697
chr19:11477575-11483140	688.357	-0.801687	0.180178	-4.44941	8.61054e-06	0.0010366
chr10:102064584-102066503	299.538	-0.806893	0.181453	-4.44685	8.71384e-06	0.00104468
chr13:16231590-16232034	34.0328	1.55452	0.349796	4.44409	8.82651e-06	0.00105382
chr3:143118554-143121978	430.99	-0.869705	0.195821	-4.44133	8.94055e-06	0.00106304
chr19:2289515-2292291	105.346	-1.07658	0.242487	-4.43976	9.00585e-06	0.0010634
chr19:35715377-35719680	603.649	-0.815663	0.183729	-4.43949	9.01714e-06	0.0010634
chr1:123103620-123104297	107.343	1.32289	0.298087	4.43792	9.08308e-06	0.00106682
chr4:4384975-4389817	679.202	-0.768019	0.173163	-4.43524	9.19687e-06	0.00106909
chr7:5283023-5285061	211.317	-0.971656	0.219095	-4.43486	9.21341e-06	0.00106909
chr7:108453474-108457188	774.846	-0.65642	0.147988	-4.43563	9.18023e-06	0.00106909
chr1:122661413-122662834	75.1771	1.35063	0.304656	4.43329	9.28042e-06	0.00107256
chr1:124129319-124129627	35.1957	1.50343	0.339634	4.42661	9.57269e-06	0.00107338
chr11:205998-210588	966.723	-0.699474	0.158109	-4.42401	9.68872e-06	0.00107338
chr11:64874755-64880112	779.468	-0.726779	0.164184	-4.42661	9.57239e-06	0.00107338
chr11:65111388-65114602	436.051	-0.814004	0.184073	-4.42219	9.77048e-06	0.00107338
chr12:57630538-57634029	523.336	-0.765201	0.172827	-4.42754	9.53135e-06	0.00107338
chr12:131928219-131931165	316.932	-0.856042	0.193306	-4.42844	9.49178e-06	0.00107338
chr16:58499035-58502898	401.107	-0.815052	0.184295	-4.42254	9.75493e-06	0.00107338
chr19:10717905-10720209	359.713	-0.795221	0.179822	-4.42228	9.76652e-06	0.00107338
chr19:49117923-49121545	403.239	-0.838198	0.18949	-4.42344	9.71398e-06	0.00107338
chr7:100156909-100159606	363.874	-0.739244	0.166963	-4.4276	9.5287e-06	0.00107338
chr9:93095207-93098500	398.127	-0.800774	0.180702	-4.43145	9.36015e-06	0.00107338
chr9:136409172-136412334	521.236	-0.742156	0.167804	-4.42274	9.7455e-06	0.00107338
chr9:136885439-136888148	360.395	-0.845294	0.191028	-4.42497	9.64574e-06	0.00107338
chr1:153944746-153947081	252.356	-0.888229	0.201213	-4.41437	1.01304e-05	0.00110036
chr19:18636300-18639100	279.649	-0.851908	0.192922	-4.41582	1.00629e-05	0.00110036
chr8:144324854-144327791	333.518	-0.864062	0.195718	-4.41484	1.01085e-05	0.00110036
chr6:165657873-165665582	957.671	-0.729509	0.165292	-4.41344	1.0174e-05	0.00110096
chr2:89830243-89832007	103.582	1.33166	0.30187	4.41138	1.02712e-05	0.00110733
chr19:7924279-7927000	202.053	-0.889366	0.201678	-4.40983	1.03452e-05	0.00111117
chr9:137254162-137257015	481.152	-0.878578	0.199349	-4.40724	1.04694e-05	0.00112034
chr8:736710-739852	243.3	-0.865325	0.196441	-4.40502	1.05775e-05	0.00112773
chrX:317254-321245	496.801	-0.859028	0.195047	-4.40421	1.06169e-05	0.00112777
chr22:20130702-20133791	266.499	-0.913396	0.207506	-4.40178	1.07367e-05	0.00113632
chr13:21059553-21062100	278.601	-0.868638	0.197452	-4.39923	1.08633e-05	0.00114553
chr11:818911-821195	225.02	-1.0161	0.231044	-4.39787	1.09317e-05	0.00114854
chr17:82064233-82066609	216.23	-0.980358	0.223067	-4.3949	1.10821e-05	0.00115613
chr22:50524200-50527384	426.687	-0.909712	0.206994	-4.39487	1.10839e-05	0.00115613
chr21:10441916-10445311	99.2915	1.31769	0.300063	4.39137	1.1264e-05	0.00117069
chr16:58024237-58028374	698.859	-0.831255	0.189358	-4.38986	1.13424e-05	0.0011713
chr7:5592280-5599326	1054.04	-0.774109	0.176347	-4.38969	1.1351e-05	0.0011713
chr4:3291042-3295509	477.054	-0.798616	0.182042	-4.387	1.14927e-05	0.0011817
chr19:5689795-5692406	286.879	-0.885588	0.202027	-4.38352	1.16778e-05	0.00119648
chr17:75513787-75518327	654.75	-0.794108	0.18122	-4.38201	1.17587e-05	0.00120051
chr1:227541713-227543226	123.698	-1.09758	0.250616	-4.37954	1.18931e-05	0.0012027
chr16:75249689-75252267	271.797	-0.923701	0.210923	-4.37932	1.1905e-05	0.0012027
chr2:128313289-128319721	663.058	-0.755682	0.172519	-4.38027	1.1853e-05	0.0012027
chr1:123333781-123334031	40.8933	1.44449	0.33015	4.37526	1.21288e-05	0.00120425
chr17:18256520-18259473	358.387	-0.892884	0.204056	-4.37569	1.2105e-05	0.00120425
chr19:37209366-37211394	231.348	0.9601	0.219369	4.37664	1.20524e-05	0.00120425
chr9:137128158-137131242	604.831	-0.724753	0.16558	-4.37707	1.20287e-05	0.00120425
chr9:137588884-137591882	344.959	-0.890722	0.203556	-4.3758	1.20986e-05	0.00120425
chr19:58407217-58410449	559.577	-0.785307	0.179587	-4.37285	1.22634e-05	0.00120519
chr22:50506324-50507783	219.097	-0.994663	0.227434	-4.37342	1.22316e-05	0.00120519
chr7:102285949-102289648	546.804	-0.811233	0.185473	-4.37386	1.22071e-05	0.00120519
chr11:67287916-67291107	345.29	-0.865311	0.197924	-4.37193	1.23155e-05	0.00120621
chr11:560161-562168	205.586	-0.885076	0.202556	-4.36953	1.24515e-05	0.00121541
chr1:122674292-122676211	73.6618	1.41362	0.323717	4.36685	1.2605e-05	0.00122213
chr7:75156283-75157736	89.8446	-1.16912	0.267723	-4.36691	1.26018e-05	0.00122213
chr1:247110554-247112695	119.606	-1.02089	0.23392	-4.36427	1.27551e-05	0.00122746
chr11:566737-569834	167.904	-0.954142	0.218667	-4.36345	1.28028e-05	0.00122746
chr11:775633-779128	402.83	-0.830526	0.19032	-4.36385	1.27795e-05	0.00122746
chr16:30063522-30070780	673.147	-0.770802	0.176668	-4.36299	1.28299e-05	0.00122746
chr8:12600369-12601967	132.989	-1.0651	0.244406	-4.35793	1.313e-05	0.00125203
chr16:85610107-85617394	323.071	-0.902578	0.20717	-4.3567	1.32038e-05	0.00125492
chr2:199456716-199460249	488.178	-0.856519	0.196657	-4.35538	1.32833e-05	0.00125835
chr1:122805747-122806508	38.6884	1.39214	0.319968	4.35086	1.35605e-05	0.0012619
chr1:123783283-123783892	82.4388	1.28914	0.296446	4.34863	1.36989e-05	0.0012619
chr12:125064467-125067509	424.226	-0.735963	0.169277	-4.34769	1.37576e-05	0.0012619
chr15:31324814-31331198	791.589	-0.622935	0.143259	-4.3483	1.37194e-05	0.0012619
chr16:4316278-4318786	279.371	-0.921579	0.211962	-4.34785	1.37477e-05	0.0012619
chr16:77211663-77213847	181.55	-0.977571	0.22481	-4.34844	1.37112e-05	0.0012619
chr16:90076850-90078669	92.0017	-1.0138	0.233116	-4.34893	1.36803e-05	0.0012619
chr17:81665351-81668222	511.336	-0.826308	0.189818	-4.35315	1.34193e-05	0.0012619
chr19:20051298-20053387	314.319	0.721717	0.165914	4.34993	1.3618e-05	0.0012619
chr8:144077099-144084226	1248.19	-0.638255	0.146659	-4.35197	1.34917e-05	0.0012619
chr18:48538141-48542914	757.386	-0.719802	0.165643	-4.34551	1.3895e-05	0.00127008
chr22:41945467-41948031	300.095	-0.880789	0.202718	-4.34489	1.39347e-05	0.00127008
chr1:123615381-123615957	95.1696	1.28258	0.295471	4.34079	1.41972e-05	0.0012739
chr17:2022797-2026346	446.874	-0.788293	0.181606	-4.34066	1.42052e-05	0.0012739
chr19:2943566-2945953	326.658	-0.879212	0.202451	-4.34283	1.4066e-05	0.0012739
chr2:135585341-135591425	432.149	0.980745	0.225972	4.34011	1.42411e-05	0.0012739
chr9:137220597-137224543	326.211	-0.853574	0.196533	-4.34315	1.40452e-05	0.0012739
chrX:9462116-9468702	392.374	-0.674373	0.155339	-4.34129	1.4165e-05	0.0012739
chr9:129025905-129028953	331.063	-0.77218	0.178006	-4.33795	1.43816e-05	0.00128249
chr4:1710176-1714487	552.456	-0.708769	0.163476	-4.33562	1.45351e-05	0.00128822
chr8:144373382-144375597	285.656	-0.923961	0.213094	-4.33593	1.45147e-05	0.00128822
chr5:147946491-147948955	164.12	1.0975	0.253281	4.33313	1.47004e-05	0.0012989
chr5:49612201-49612534	37.449	1.46891	0.339069	4.3322	1.47629e-05	0.00130044
chr19:32673023-32677102	530.23	-0.737468	0.17028	-4.3309	1.48499e-05	0.00130412
chr1:124402299-124402838	69.7627	1.41174	0.326097	4.3292	1.49654e-05	0.00130444
chr10:42077442-42077973	58.477	1.39331	0.321866	4.32885	1.49889e-05	0.00130444
chr7:143378383-143383013	514.191	-0.767144	0.177185	-4.32961	1.49371e-05	0.00130444
chr1:159780038-159781893	52.9426	1.31101	0.30303	4.32634	1.51607e-05	0.00131543
chr12:124862082-124864452	270.183	-0.814735	0.1885	-4.3222	1.54484e-05	0.00133638
chr16:1473211-1476219	482.203	-0.678179	0.157005	-4.31948	1.56399e-05	0.0013489
chr19:10229215-10231921	387.464	-0.772735	0.178948	-4.31821	1.57303e-05	0.00135266
chr10:132306092-132309305	258.186	-0.875729	0.202969	-4.3146	1.59895e-05	0.00136859
chr16:88855379-88858529	434.468	-0.782917	0.18147	-4.31431	1.60102e-05	0.00136859
chr1:85199443-85203117	430.33	-0.744706	0.172735	-4.31127	1.6232e-05	0.00137132
chr14:24050740-24053532	372.374	-0.858834	0.199193	-4.31156	1.62104e-05	0.00137132
chr20:64062323-64064779	312.965	-0.848052	0.196689	-4.31164	1.62049e-05	0.00137132
chr8:144753433-144756305	374.905	-0.815762	0.189183	-4.31202	1.61766e-05	0.00137132
chr20:23360817-23364354	598.637	-0.703634	0.163242	-4.31037	1.62984e-05	0.00137292
chr12:122223583-122227578	563.394	-0.709189	0.164787	-4.30368	1.67988e-05	0.00138281
chr16:77072-79362	237.161	-0.894428	0.207714	-4.30605	1.66197e-05	0.00138281
chr17:36182409-36184086	264.606	-0.931385	0.216269	-4.30661	1.65776e-05	0.00138281
chr19:4909107-4912514	366.914	-0.69722	0.161852	-4.30776	1.64914e-05	0.00138281
chr21:46456991-46461716	657.224	-0.614364	0.142629	-4.30742	1.65166e-05	0.00138281
chr3:13070034-13074678	245.722	-0.817725	0.189926	-4.30549	1.6662e-05	0.00138281
chr7:75736703-75740201	602.163	-0.798803	0.1856	-4.30389	1.67824e-05	0.00138281
chr8:11014608-11017933	299.557	-0.808138	0.187727	-4.30485	1.67099e-05	0.00138281
chr1:146228061-146229179	191.209	-0.997979	0.232033	-4.30103	1.70008e-05	0.00139546
chr16:4270687-4275001	741.547	-0.671298	0.156192	-4.29791	1.72416e-05	0.00141122
chr10:29733891-29737524	551.406	-0.749479	0.174587	-4.29287	1.76377e-05	0.00143816
chr4:971848-974159	196.705	-1.08319	0.252347	-4.29246	1.76703e-05	0.00143816
chr16:89699711-89702713	350.233	-0.877215	0.204616	-4.28712	1.81002e-05	0.00146901
chr19:1103297-1105797	293.357	-0.875809	0.204326	-4.28633	1.81653e-05	0.00147017
chr9:129639813-129642842	436.548	-0.824684	0.192626	-4.28127	1.85831e-05	0.00149978
chr13:16127684-16128839	43.4533	1.41668	0.330952	4.28062	1.86374e-05	0.00149997
chr16:719233-722121	272.729	-0.897395	0.20968	-4.27983	1.87033e-05	0.00150109
chr16:1780784-1784678	648.262	-0.686031	0.160329	-4.27889	1.87829e-05	0.00150331
chr19:10927246-10930796	497.565	-0.824115	0.192686	-4.27698	1.89445e-05	0.00150789
chr6:166954709-166957343	325.173	-0.913608	0.213597	-4.27725	1.89218e-05	0.00150789
chr19:19625318-19629290	351.055	-0.761151	0.17804	-4.27517	1.90991e-05	0.00151601
chr16:2222606-2225326	470.782	-0.702414	0.164325	-4.27453	1.9154e-05	0.00151621
chr1:124720915-124722181	50.068	1.37773	0.322576	4.27102	1.94578e-05	0.00153605
chr11:1307879-1310992	371.37	-0.778836	0.182575	-4.26583	1.99161e-05	0.00156794
chr1:122827198-122828078	40.7874	1.38729	0.325289	4.26478	2.00103e-05	0.00157108
chr1:123098332-123099501	52.661	1.30199	0.305695	4.2591	2.05249e-05	0.00160277
chr1:228404242-228408535	600.724	-0.685202	0.160858	-4.25967	2.04728e-05	0.00160277
chr17:80453815-80455915	307.67	-0.868291	0.203956	-4.25725	2.0696e-05	0.00161177
chr22:37425156-37428198	200.536	-0.939945	0.220934	-4.25443	2.09587e-05	0.00162785
chr15:73750374-73753807	324.04	-0.775368	0.182343	-4.25225	2.11631e-05	0.00163932
chr14:63042945-63046957	607.557	-0.735093	0.17316	-4.24518	2.1842e-05	0.00168738
chr1:123418256-123419134	46.9846	1.36696	0.322058	4.24445	2.19131e-05	0.00168836
chr2:73069124-73072479	539.911	-0.769043	0.181251	-4.24297	2.20583e-05	0.00169503
chr10:97183501-97186804	291.296	-0.825766	0.194648	-4.24236	2.21183e-05	0.00169513
chr1:5990221-5994782	573.849	-0.732633	0.172757	-4.24082	2.22701e-05	0.00170225
chr1:122961362-122962109	26.0783	1.4898	0.351397	4.23964	2.23882e-05	0.00170336
chr1:143237779-143238540	92.6749	1.2742	0.300831	4.2356	2.27941e-05	0.00170336
chr12:118102605-118104746	289.484	-0.844702	0.199439	-4.23539	2.28153e-05	0.00170336
chr12:121294418-121298338	660.54	-0.674919	0.159279	-4.23734	2.26182e-05	0.00170336
chr15:20417838-20421163	80.3587	1.27402	0.300801	4.23544	2.28108e-05	0.00170336
chr15:74431586-74434726	400.212	-0.800153	0.188822	-4.23761	2.25912e-05	0.00170336
chr16:634874-638008	428.727	-0.819746	0.19339	-4.23882	2.24693e-05	0.00170336
chr19:33193350-33196409	291.286	-0.7708	0.181981	-4.23561	2.27937e-05	0.00170336
chr20:63954059-63957580	485.803	-0.745037	0.175832	-4.23722	2.26302e-05	0.00170336
chr9:136991699-136993866	281.089	-0.834625	0.197194	-4.23251	2.31093e-05	0.00172087
chr9:137026027-137029411	252.176	-0.894224	0.211323	-4.23156	2.32078e-05	0.00172376
chr1:124725836-124726456	28.9468	1.45038	0.342824	4.23068	2.32984e-05	0.00172606
chr1:143210276-143211310	62.6101	1.36776	0.323388	4.22946	2.3425e-05	0.00172658
chr10:130135815-130138624	488.633	-0.673739	0.159285	-4.22976	2.33937e-05	0.00172658
chr10:133334925-133337358	183.342	-0.954774	0.225954	-4.22551	2.38395e-05	0.00175266
chr1:123108256-123108930	33.4756	1.38637	0.328323	4.22258	2.41519e-05	0.00175774
chr14:105298459-105302192	488.994	-0.686629	0.162598	-4.22288	2.41205e-05	0.00175774
chr17:78357724-78361037	303.634	-0.821015	0.194425	-4.22278	2.41308e-05	0.00175774
chr3:49688582-49691541	514.295	-0.729646	0.172759	-4.2235	2.40535e-05	0.00175774
chr1:36154684-36161842	784.597	-0.692798	0.164146	-4.22062	2.43635e-05	0.00176624
chr10:98029022-98031764	209.764	-0.901307	0.21359	-4.2198	2.44521e-05	0.00176624
chr2:31136649-31139015	304.939	-0.774388	0.183503	-4.22002	2.44284e-05	0.00176624
chr6:44255290-44258101	411.123	-0.761376	0.180477	-4.21869	2.45723e-05	0.00177049
chr12:106301410-106305025	382.068	-0.745603	0.176838	-4.21631	2.48329e-05	0.00178039
chr16:2473351-2477034	386.413	-0.814097	0.193074	-4.21651	2.48114e-05	0.00178039
chr1:6259352-6261820	253.267	-0.839841	0.199226	-4.21551	2.49215e-05	0.00178232
chr7:1663914-1671423	491.97	-0.808844	0.191953	-4.21377	2.51145e-05	0.00179169
chr1:34927712-34930895	300.335	-0.770717	0.182934	-4.21308	2.51907e-05	0.0017927
chr10:86362864-86367928	471.756	-0.825085	0.195902	-4.21172	2.53436e-05	0.00179849
chr8:143770324-143772445	138.052	-0.970117	0.230364	-4.21125	2.53967e-05	0.00179849
chr1:123714346-123715251	80.2893	1.24865	0.296603	4.20983	2.55562e-05	0.00180537
chr4:3954293-3957803	327.475	-0.786115	0.186763	-4.20915	2.56337e-05	0.00180642
chr11:831919-834713	247.297	-0.860232	0.204529	-4.20592	2.60018e-05	0.0018279
chr5:172186616-172189505	425.437	-0.763869	0.181699	-4.20404	2.62198e-05	0.00183876
chr1:1114401-1117521	255.508	-0.801229	0.190729	-4.20088	2.65874e-05	0.0018582
chr1:124237570-124237833	31.461	1.46057	0.347799	4.19947	2.67542e-05	0.0018582
chr11:117792804-117797943	463.483	-0.695539	0.165623	-4.19955	2.6745e-05	0.0018582
chr9:128419689-128421641	151.02	-0.989164	0.235537	-4.19961	2.67379e-05	0.0018582
chr13:16003429-16003871	24.0881	1.45994	0.347702	4.19881	2.68317e-05	0.00185911
chr11:2399225-2402228	614.084	-0.781996	0.18644	-4.19435	2.73649e-05	0.00189152
chr11:1390184-1392561	290.077	-0.787204	0.187725	-4.1934	2.74805e-05	0.00189498
chr1:122685605-122686333	135.795	1.02524	0.244556	4.19225	2.76197e-05	0.00189552
chr17:81869353-81872822	474.343	-0.79885	0.190537	-4.19263	2.7574e-05	0.00189552
chr9:137239028-137243205	511.011	-0.715462	0.170707	-4.19116	2.7753e-05	0.00190016
chr1:25615773-25619953	252.82	-0.797717	0.190525	-4.18694	2.82739e-05	0.00192655
chr12:57215832-57220894	160.529	-0.856102	0.204547	-4.18536	2.84718e-05	0.00192655
chr16:38276117-38276754	66.7661	1.31751	0.314637	4.18739	2.82185e-05	0.00192655
chr5:180289417-180294157	468.374	-0.711933	0.170095	-4.1855	2.84536e-05	0.00192655
chr9:43946153-43946436	39.4272	1.38357	0.330502	4.18628	2.83561e-05	0.00192655
chr11:64034705-64038670	350.83	-0.863286	0.206336	-4.18388	2.8657e-05	0.00192759
chr2:20222778-20226042	393.334	-0.795779	0.190229	-4.18326	2.87355e-05	0.00192759
chr22:10779265-10781690	53.7394	1.31345	0.313937	4.1838	2.86673e-05	0.00192759
chr4:2259892-2263431	314.312	-0.886738	0.21198	-4.18312	2.87541e-05	0.00192759
chr22:19852499-19856352	632.528	-0.78605	0.187941	-4.18242	2.88423e-05	0.00192903
chr21:12979741-12980947	25.6651	1.46896	0.351367	4.1807	2.90616e-05	0.00193474
chr8:22140624-22142925	215.434	-0.889651	0.212775	-4.18118	2.90006e-05	0.00193474
chr19:1406601-1410643	449.12	-0.785087	0.18782	-4.17999	2.91517e-05	0.00193628
chr7:55018278-55020813	201.891	-0.910041	0.217758	-4.17914	2.9261e-05	0.00193908
chr1:11478355-11483190	561.581	-0.716258	0.171427	-4.17822	2.93805e-05	0.00194254
chr16:739527-742248	326.094	-0.871919	0.208778	-4.1763	2.96284e-05	0.00194353
chr2:89776492-89778419	41.7696	1.3963	0.334321	4.17653	2.95984e-05	0.00194353
chr6:29941739-29943865	232.549	-0.82387	0.197286	-4.17603	2.96644e-05	0.00194353
chr8:1762458-1766496	470.295	-0.706701	0.169179	-4.17724	2.9507e-05	0.00194353
chr10:50066582-50069541	436.832	-0.712516	0.170711	-4.1738	2.99558e-05	0.00194935
chr20:57263141-57267354	246.794	-0.878608	0.210488	-4.17414	2.99109e-05	0.00194935
chr22:21641330-21643797	238.702	-0.832326	0.199399	-4.17417	2.9908e-05	0.00194935
chr4:6574231-6576352	224.643	-0.884271	0.212148	-4.16819	3.0703e-05	0.00199349
chr11:61292960-61296131	388.453	-0.837647	0.20114	-4.16451	3.12028e-05	0.00200698
chr13:17144701-17145454	55.9987	1.319	0.316729	4.16446	3.12097e-05	0.00200698
chr19:7533221-7536512	567.913	-0.715078	0.171707	-4.16453	3.11992e-05	0.00200698
chr20:20016707-20019464	445.753	-0.723088	0.173648	-4.1641	3.12581e-05	0.00200698
chr9:135499108-135502280	552.723	-0.827507	0.198685	-4.16491	3.11475e-05	0.00200698
chr21:10338173-10341101	68.5194	1.30672	0.313859	4.1634	3.13549e-05	0.00200873
chr21:7936875-7938807	53.4997	1.30122	0.312614	4.16239	3.14933e-05	0.00201314
chr7:76548613-76551310	538.712	-0.680569	0.163537	-4.16155	3.16096e-05	0.00201611
chr3:9730529-9733773	531.554	-0.745454	0.179186	-4.16022	3.1794e-05	0.0020234
chr3:64219055-64226162	710.394	0.74779	0.179808	4.15883	3.1988e-05	0.00202682
chr4:143335161-143339046	607.824	-0.709941	0.170697	-4.15907	3.19541e-05	0.00202682
chr11:63914280-63919055	476.018	-0.817051	0.196544	-4.1571	3.22313e-05	0.00203777
chr1:120722948-120725470	312.347	-0.827556	0.199306	-4.15219	3.29314e-05	0.00204563
chr1:124691149-124692409	77.1901	1.2618	0.303834	4.15292	3.28258e-05	0.00204563
chr14:104689201-104690922	83.8993	-1.13354	0.272856	-4.15434	3.26233e-05	0.00204563
chr18:62751859-62753264	38.7585	1.27328	0.306685	4.15176	3.29928e-05	0.00204563
chr20:4821195-4824481	554.482	-0.686478	0.165245	-4.15429	3.26298e-05	0.00204563
chr20:29083847-29086131	71.3924	1.34369	0.3236	4.15233	3.29105e-05	0.00204563
chr20:62385106-62388940	668.38	-0.683474	0.164611	-4.15205	3.29516e-05	0.00204563
chr3:52531839-52534981	313.94	-0.878474	0.211549	-4.15259	3.2874e-05	0.00204563
chr5:179343318-179346057	215.174	-0.890078	0.214181	-4.15572	3.24266e-05	0.00204563
chr1:2524180-2531483	679.607	-0.707789	0.170639	-4.14788	3.35571e-05	0.00206291
chr19:819421-823649	324.371	-0.710386	0.171252	-4.14818	3.35125e-05	0.00206291
chr2:85753195-85756122	305.888	-0.849363	0.204759	-4.1481	3.35247e-05	0.00206291
chr2:130179704-130184339	855.647	-0.645275	0.155524	-4.14905	3.3386e-05	0.00206291
chr7:2632005-2635443	587.355	-0.772307	0.186297	-4.14556	3.3898e-05	0.00207944
chr10:41869011-41870153	60.3874	1.23006	0.296828	4.14401	3.41281e-05	0.00208912
chr1:1405775-1408861	600.736	-0.675559	0.16304	-4.14352	3.4201e-05	0.00208916
chr5:176364748-176367303	329.896	-0.831658	0.200801	-4.1417	3.44735e-05	0.00210136
chr16:87602850-87607056	675.897	-0.674886	0.162991	-4.14065	3.4633e-05	0.00210663
chr7:60310663-60311041	40.1486	1.33985	0.323867	4.13704	3.5181e-05	0.00213547
chr7:5045209-5047951	432.675	-0.712691	0.172341	-4.13535	3.54414e-05	0.00214677
chr11:119148322-119150547	212.022	-0.854004	0.20658	-4.13401	3.56487e-05	0.00215481
chr20:45889724-45892484	466.072	-0.838831	0.20294	-4.13339	3.57457e-05	0.00215616
chr3:184228928-184231516	199.302	-0.893254	0.216198	-4.13165	3.60175e-05	0.00216803
chr1:124732951-124733588	36.402	1.39359	0.337493	4.12925	3.63948e-05	0.00217713
chr14:95318380-95320455	137.279	-0.963564	0.233325	-4.1297	3.63229e-05	0.00217713
chr3:123025435-123029410	545.359	-0.736093	0.178258	-4.12936	3.63771e-05	0.00217713
chr1:124270035-124270580	54.4989	1.38289	0.335022	4.12777	3.66295e-05	0.00217836
chr15:20401671-20404061	59.4776	1.3013	0.31526	4.1277	3.66415e-05	0.00217836
chr17:82050064-82053374	350.797	-0.877914	0.212653	-4.1284	3.653e-05	0.00217836
chr21:31554501-31561068	886.255	-0.626535	0.151823	-4.12674	3.67947e-05	0.00218297
chr1:124456410-124457635	36.9617	1.37669	0.333677	4.12583	3.69401e-05	0.00218711
chr12:131894527-131897109	324.148	-0.836553	0.202788	-4.12525	3.70325e-05	0.0021881
chr8:144508126-144510812	322.789	-0.929168	0.225411	-4.1221	3.7543e-05	0.00221374
chr1:236063577-236065929	246.016	-0.884457	0.214721	-4.1191	3.80354e-05	0.00222912
chr11:745911-749495	639.567	-0.658124	0.159773	-4.11913	3.80307e-05	0.00222912
chr12:113055550-113059951	418.658	-0.711763	0.172763	-4.11988	3.79063e-05	0.00222912
chr4:108512416-108513635	39.7933	1.21356	0.294849	4.11587	3.85717e-05	0.00225598
chr1:122609987-122610574	37.8296	1.34298	0.326399	4.11455	3.87938e-05	0.00225982
chr1:122841580-122842046	46.5712	1.31339	0.319174	4.11497	3.87222e-05	0.00225982
chr19:17555041-17557276	357.28	-0.743629	0.180771	-4.11365	3.89449e-05	0.00226405
chr12:86835155-86839556	223.518	0.945557	0.229933	4.11232	3.91708e-05	0.00227261
chr1:21618943-21623216	171.916	-0.783817	0.190751	-4.10912	3.97175e-05	0.00228143
chr12:132709562-132712517	519.366	-0.673235	0.163782	-4.11055	3.94724e-05	0.00228143
chr19:54187676-54192780	711.958	-0.732338	0.178205	-4.10952	3.96485e-05	0.00228143
chr4:9151184-9154002	199.458	-0.85098	0.207053	-4.10997	3.9571e-05	0.00228143
chrY:11329609-11330374	66.9402	1.24635	0.303304	4.10926	3.96934e-05	0.00228143
chr19:27389953-27391009	25.8553	1.43528	0.349372	4.10818	3.98797e-05	0.00228167
chr22:50472763-50475831	352.197	-0.769467	0.187281	-4.10863	3.98008e-05	0.00228167
chr1:122571188-122571748	31.8907	1.39239	0.339115	4.10595	4.02655e-05	0.00228379
chr1:155050015-155052810	370.78	-0.852676	0.207725	-4.10483	4.04621e-05	0.00228379
chr1:228139203-228142956	508.694	-0.7039	0.171452	-4.10553	4.03388e-05	0.00228379
chr13:16018516-16019538	33.9986	1.33732	0.325889	4.10362	4.06741e-05	0.00228379
chr16:89814284-89818035	403.587	-0.723877	0.176384	-4.10399	4.06086e-05	0.00228379
chr19:1564596-1567734	381.381	-0.808052	0.196898	-4.10392	4.06204e-05	0.00228379
chr4:8156807-8160356	514.257	-0.793065	0.193138	-4.1062	4.02214e-05	0.00228379
chr7:71130600-71134700	604.866	-0.666353	0.162261	-4.10666	4.01416e-05	0.00228379
chr7:74452543-74456447	339.36	-0.782248	0.190461	-4.10712	4.00621e-05	0.00228379
chr7:100672629-100676935	572.727	-0.738381	0.179943	-4.10343	4.07072e-05	0.00228379
chr2:218397925-218401898	271.178	-0.83148	0.202686	-4.10231	4.09039e-05	0.00229038
chr1:2389991-2393572	572.489	-0.639678	0.156049	-4.0992	4.14573e-05	0.00229212
chr12:48813797-48820739	1016.24	-0.578683	0.141089	-4.10156	4.10381e-05	0.00229212
chr16:1970909-1973553	392.939	-0.796722	0.194312	-4.10021	4.12778e-05	0.00229212
chr17:78253559-78254717	210.022	-0.848456	0.207025	-4.09832	4.16162e-05	0.00229212
chr19:47272751-47276800	447.873	-0.728247	0.17759	-4.10073	4.11852e-05	0.00229212
chr2:73110476-73114372	457.603	-0.70196	0.171193	-4.10041	4.12417e-05	0.00229212
chr2:97112403-97114138	421.517	-0.772081	0.188361	-4.09894	4.15053e-05	0.00229212
chr22:17084297-17085941	108.948	-1.04383	0.254653	-4.09901	4.14925e-05	0.00229212
chr8:37693972-37700808	722.367	-0.664818	0.162224	-4.09814	4.1649e-05	0.00229212
chr15:20656184-20658398	53.321	1.3245	0.3233	4.0968	4.18898e-05	0.00229228
chr19:33300502-33304323	316.415	-0.798272	0.194846	-4.09694	4.18649e-05	0.00229228
chr8:144442914-144445613	263.273	-0.856884	0.209153	-4.09692	4.1869e-05	0.00229228
chr22:20015163-20017935	365.466	-0.780992	0.190701	-4.09536	4.21504e-05	0.00230218
chr9:63821023-63822630	64.0806	1.32435	0.323444	4.09451	4.2306e-05	0.00230631
chr11:44948699-44951564	423.129	-0.825916	0.20177	-4.09335	4.25182e-05	0.00231352
chr2:241147396-241151918	874.032	-0.706213	0.172576	-4.09218	4.27328e-05	0.00232083
chr1:123535445-123536840	70.7837	1.24752	0.304921	4.09129	4.28978e-05	0.00232541
chr17:18259968-18262245	366.771	-0.772257	0.188913	-4.0879	4.35293e-05	0.00235523
chr17:81681956-81685866	683.001	-0.68528	0.167669	-4.08711	4.36774e-05	0.00235882
chr9:136326812-136330027	366.006	-0.832272	0.203669	-4.08639	4.38133e-05	0.00236175
chr19:17074049-17078124	548.519	-0.626523	0.153389	-4.08452	4.41673e-05	0.0023764
chr1:124454328-124455229	56.1328	1.25039	0.30622	4.08331	4.4398e-05	0.00238437
chr1:6579066-6582054	272.794	-0.788898	0.193263	-4.082	4.46497e-05	0.00238901
chr16:30747573-30750055	224.611	-0.758905	0.185909	-4.08214	4.46238e-05	0.00238901
chr1:124168069-124168394	45.127	1.28452	0.314724	4.08142	4.47609e-05	0.00239053
chr1:123798379-123799614	42.3342	1.38719	0.340024	4.07967	4.51006e-05	0.00239177
chr11:2268009-2271364	130.996	-0.887413	0.217551	-4.07911	4.52088e-05	0.00239177
chr11:7512834-7514944	306.532	-0.836436	0.205094	-4.07831	4.53636e-05	0.00239177
chr15:75346370-75349341	374.894	-0.804863	0.19732	-4.07898	4.52343e-05	0.00239177
chr19:18587920-18591413	464.717	-0.700188	0.171615	-4.08	4.50356e-05	0.00239177
chr19:55639386-55645356	626.834	-0.683137	0.167496	-4.07852	4.53235e-05	0.00239177
chr7:100705008-100708166	566.308	-0.672501	0.164851	-4.07945	4.51424e-05	0.00239177
chr1:19310227-19314106	523.088	-0.715045	0.175431	-4.07593	4.58303e-05	0.00239887
chr1:123559065-123560862	93.5718	1.17073	0.287173	4.07676	4.56669e-05	0.00239887
chr10:45726240-45728693	451.045	-0.719626	0.176549	-4.07607	4.58039e-05	0.00239887
chr5:132226486-132228467	189.795	-0.933435	0.22895	-4.07702	4.56157e-05	0.00239887
chr4:779796-782773	524.583	-0.730897	0.179362	-4.07497	4.60199e-05	0.00240444
chr16:1959114-1961285	286.356	-0.79626	0.195514	-4.07265	4.64812e-05	0.00242415
chr16:4624162-4627589	525.845	-0.652477	0.160261	-4.07135	4.67422e-05	0.00243337
chr17:7349189-7353310	413.997	-0.764393	0.187794	-4.07038	4.69358e-05	0.00243906
chr19:3505204-3509085	480.984	-0.739258	0.181659	-4.06948	4.71185e-05	0.00244257
chr19:49766954-49769431	263.774	-0.719519	0.17682	-4.06921	4.71724e-05	0.00244257
chr11:66256636-66259675	504.429	-0.740206	0.181951	-4.06816	4.73867e-05	0.0024449
chr19:4063416-4065727	141.87	-1.04743	0.257469	-4.06818	4.73827e-05	0.0024449
chr12:6866717-6870058	385.762	-0.731466	0.179858	-4.0669	4.7642e-05	0.00245369
chr22:18969673-18972217	281.596	-0.776311	0.190954	-4.06544	4.79422e-05	0.00246129
chr7:151079399-151084172	521.421	-0.767681	0.188835	-4.06535	4.79599e-05	0.00246129
chr1:53324928-53329047	640.116	-0.764899	0.188283	-4.0625	4.85508e-05	0.00246194
chr1:123324158-123324557	42.9232	1.37662	0.338773	4.06356	4.83305e-05	0.00246194
chr1:123614335-123614887	18.8916	1.44826	0.356558	4.06179	4.86974e-05	0.00246194
chr11:65917037-65921112	543.847	-0.711898	0.175141	-4.06471	4.80927e-05	0.00246194
chr12:132488937-132489941	81.6248	-1.10409	0.271837	-4.06159	4.87394e-05	0.00246194
chr13:71758452-71760965	79.9292	1.03957	0.255878	4.06274	4.85001e-05	0.00246194
chr17:81711030-81713912	317.84	-0.748034	0.184163	-4.0618	4.86953e-05	0.00246194
chr19:2424653-2428496	393.24	-0.815603	0.200669	-4.06443	4.81507e-05	0.00246194
chr4:672881-675823	383.386	-0.839357	0.206639	-4.06195	4.86639e-05	0.00246194
chrY:56868309-56871280	84.4464	1.20816	0.297526	4.0607	4.89268e-05	0.00246709
chr1:123393567-123394222	28.6921	1.39956	0.34489	4.05799	4.94967e-05	0.00248715
chr6:114341306-114344662	354.547	-0.741195	0.182646	-4.05811	4.94723e-05	0.00248715
chr11:67502931-67506276	315.544	-0.77384	0.190846	-4.05479	5.01803e-05	0.00250841
chr16:67658622-67662147	636.884	-0.717798	0.177008	-4.05517	5.00973e-05	0.00250841
chr4:6198208-6201397	322.59	-0.777402	0.191712	-4.05505	5.01233e-05	0.00250841
chr1:122663810-122664303	21.093	1.4364	0.354311	4.05407	5.03332e-05	0.00251171
chr3:78668434-78670785	85.7296	1.06518	0.262791	4.05335	5.04888e-05	0.00251297
chr5:1008505-1010398	139.065	-0.904656	0.223227	-4.05262	5.06467e-05	0.00251297
chr8:143839534-143841032	212.322	-0.854609	0.210892	-4.05235	5.07065e-05	0.00251297
chr9:136847180-136850873	384.199	-0.811057	0.200122	-4.05282	5.06047e-05	0.00251297
chr1:122850110-122851259	63.3647	1.24425	0.307167	4.05074	5.10569e-05	0.00252601
chr8:143683918-143686121	311.376	-0.742124	0.183238	-4.05006	5.12048e-05	0.00252899
chr11:67265730-67268881	281.059	-0.821964	0.203029	-4.04851	5.1544e-05	0.00254131
chr17:50345259-50347958	271.974	-0.775789	0.191642	-4.04812	5.16316e-05	0.00254131
chr19:42215065-42218250	454.865	-0.758019	0.18727	-4.04772	5.17181e-05	0.00254131
chr12:113183993-113187263	522.159	-0.656083	0.162155	-4.04601	5.20974e-05	0.00254695
chr17:73308346-73312744	803.588	-0.66509	0.164373	-4.04622	5.2051e-05	0.00254695
chr22:29305930-29307918	227.147	-0.898536	0.222075	-4.0461	5.20789e-05	0.00254695
chr1:122913382-122914171	55.8832	1.34047	0.331759	4.0405	5.33371e-05	0.00258393
chr16:1941715-1943962	205.993	-0.819927	0.202879	-4.04145	5.31206e-05	0.00258393
chr16:67528033-67531565	511.429	-0.767333	0.189897	-4.04079	5.32712e-05	0.00258393
chr17:25788475-25788731	35.1544	1.34675	0.333274	4.04099	5.32271e-05	0.00258393
chr21:43774841-43777424	416.358	-0.674436	0.166855	-4.04205	5.29849e-05	0.00258393
chr3:24493470-24495989	347.208	-0.743903	0.184122	-4.04027	5.33903e-05	0.00258393
chr14:104863639-104867376	317.784	-0.853161	0.211245	-4.03873	5.37414e-05	0.00259657
chr11:808297-811501	651.119	-0.706686	0.175003	-4.03814	5.38775e-05	0.0025988
chr19:39411353-39416388	794.93	-0.628671	0.155725	-4.03706	5.41245e-05	0.00260636
chr16:89686055-89688217	320.879	-0.739039	0.183153	-4.0351	5.45798e-05	0.00262391
chr15:68228257-68230525	319.105	-0.770263	0.19103	-4.03215	5.52679e-05	0.00264999
chr9:137085526-137088804	523.999	-0.743795	0.184473	-4.03199	5.53057e-05	0.00264999
chr1:228081140-228085789	780.985	-0.650828	0.161469	-4.03067	5.56189e-05	0.00265181
chr17:26624845-26625801	83.1827	1.20326	0.298472	4.03138	5.54492e-05	0.00265181
chr2:26846262-26853536	1000.18	-0.654208	0.162306	-4.0307	5.56116e-05	0.00265181
chr2:90243873-90246174	122.555	-0.995818	0.247119	-4.02971	5.58463e-05	0.00265827
chr1:122737749-122738367	82.4231	1.20848	0.300061	4.02744	5.63879e-05	0.00267523
chr22:19713671-19719499	438.217	-0.841144	0.208848	-4.02755	5.63618e-05	0.00267523
chr14:104813906-104817783	675.286	-0.654015	0.162429	-4.02646	5.66235e-05	0.00268086
chr5:441772-444985	505.095	-0.797271	0.198022	-4.02617	5.6692e-05	0.00268086
chr1:228275286-228276980	80.108	-1.09498	0.272035	-4.02515	5.69399e-05	0.00268625
chr12:12927766-12928114	14.177	1.43404	0.356323	4.02455	5.70851e-05	0.00268625
chr12:56314198-56317263	551.769	-0.653179	0.162285	-4.02489	5.70013e-05	0.00268625
chr10:70380612-70383254	362.693	-0.733583	0.182342	-4.02311	5.74339e-05	0.00269827
chr16:18401132-18401589	82.7771	-1.09061	0.271145	-4.02223	5.76506e-05	0.00270406
chr12:120262672-120266284	248.757	-0.743936	0.184987	-4.02155	5.78154e-05	0.00270739
chr19:8208319-8211186	310.968	-0.813452	0.202342	-4.02018	5.81536e-05	0.00271882
chr20:21505524-21506999	82.2605	-1.03465	0.257414	-4.0194	5.83469e-05	0.00272345
chr12:57725871-57727506	79.8133	-1.08759	0.270675	-4.01806	5.868e-05	0.00273458
chr9:136541482-136547301	385.232	-0.784932	0.195424	-4.01656	5.90542e-05	0.00274759
chr5:139647319-139653602	466.356	-0.755121	0.188047	-4.01559	5.92964e-05	0.00275
chr7:75993299-75995332	270.313	-0.894803	0.222829	-4.01564	5.92843e-05	0.00275
chr1:125176909-125177533	30.3665	1.39639	0.347782	4.01512	5.94148e-05	0.00275048
chr17:26587544-26587882	38.6916	1.33144	0.331695	4.01404	5.96875e-05	0.00275048
chr7:129778585-129781830	109.65	-0.956083	0.238177	-4.01418	5.96528e-05	0.00275048
chr8:143595583-143599969	526.117	-0.717517	0.178731	-4.01451	5.95702e-05	0.00275048
chr1:122698555-122700385	62.1108	1.28088	0.31933	4.01116	6.04203e-05	0.0027587
chr11:46346659-46349703	254.623	-0.813935	0.202921	-4.01109	6.04387e-05	0.0027587
chr17:17835185-17837921	290.791	-0.823121	0.205116	-4.01296	5.99623e-05	0.0027587
chr19:5902095-5905818	630.827	-0.669321	0.166838	-4.0118	6.02587e-05	0.0027587
chr19:8830864-8833514	370.465	-0.741333	0.184787	-4.01183	6.02511e-05	0.0027587
chr20:29122714-29123207	20.8142	1.41049	0.351556	4.01213	6.01724e-05	0.0027587
chr14:99682846-99685054	343.381	-0.735343	0.183385	-4.00983	6.07623e-05	0.00276479
chr7:1158160-1161907	539.185	-0.642779	0.160301	-4.00983	6.07636e-05	0.00276479
chr4:49112208-49115723	174.218	1.06698	0.266221	4.00788	6.12673e-05	0.00278333
chr17:24740192-24740454	38.3594	1.3332	0.332748	4.00665	6.15872e-05	0.00279347
chr16:688938-690841	239.935	-0.83065	0.207343	-4.00617	6.17122e-05	0.00279475
chr21:10330700-10334012	76.8667	1.23147	0.307654	4.00278	6.26028e-05	0.00283065
chr16:21501184-21503157	454.666	-0.763567	0.190779	-4.00237	6.27111e-05	0.00283111
chr1:1373340-1376454	497.264	-0.695728	0.17388	-4.0012	6.30227e-05	0.0028326
chr1:122692508-122693446	40.6378	1.31019	0.327441	4.0013	6.29958e-05	0.0028326
chr16:4183063-4184698	254.074	-0.84571	0.211367	-4.00114	6.30383e-05	0.0028326
chr8:144136759-144139690	321.261	-0.851616	0.212915	-3.99979	6.33981e-05	0.00284435
chr1:123485277-123485797	36.8161	1.32159	0.330495	3.99882	6.36594e-05	0.00284601
chr12:30925855-30928533	233.621	-0.776695	0.194272	-3.99799	6.38836e-05	0.00284601
chr12:123531240-123535085	353.647	-0.699602	0.174996	-3.99782	6.39275e-05	0.00284601
chr3:195954235-195955873	203.689	-0.785695	0.196465	-3.99916	6.35677e-05	0.00284601
chr6:131249643-131253801	528.4	0.667173	0.166865	3.99828	6.38038e-05	0.00284601
chr19:7680397-7682373	301.589	-0.871573	0.218098	-3.99625	6.43546e-05	0.00285184
chr3:34842974-34845009	62.426	1.13225	0.283326	3.99627	6.43473e-05	0.00285184
chr7:158826909-158831129	608.511	-0.625795	0.156568	-3.99696	6.41612e-05	0.00285184
chr11:848710-852310	301.71	-0.813288	0.203542	-3.99567	6.45125e-05	0.00285446
chr5:178859265-178862917	327.48	-0.730914	0.182947	-3.99522	6.46331e-05	0.00285542
chr12:124564002-124568362	573.57	-0.635966	0.159219	-3.99428	6.48921e-05	0.00285812
chr22:20020389-20022193	192.638	-0.882759	0.220995	-3.99447	6.48399e-05	0.00285812
chr17:4787934-4791294	465.212	-0.708551	0.177455	-3.99285	6.52832e-05	0.00285928
chr19:40662678-40663983	210.458	-0.820522	0.205522	-3.99238	6.54132e-05	0.00285928
chr3:13876712-13881000	777.154	-0.702861	0.176009	-3.99333	6.51518e-05	0.00285928
chr5:144204318-144214448	1020.66	0.704114	0.176361	3.99246	6.5391e-05	0.00285928
chr9:128455358-128458005	389.381	-0.822541	0.205989	-3.99314	6.5204e-05	0.00285928
chr6:3749507-3752636	245.552	-0.794681	0.19909	-3.99158	6.56359e-05	0.00286468
chr3:159762809-159766689	496.823	-0.655206	0.164191	-3.99051	6.59317e-05	0.00287325
chr8:22564867-22567259	220.892	-0.819817	0.205472	-3.98991	6.60976e-05	0.00287614
chr10:72272141-72278582	781.085	-0.630965	0.158172	-3.9891	6.63247e-05	0.00287779
chr5:141873547-141879671	940.022	-0.620879	0.155657	-3.98875	6.64212e-05	0.00287779
chr8:7091607-7092884	136.902	-0.98885	0.247913	-3.98871	6.64343e-05	0.00287779
chr3:125766139-125767973	146.553	-0.922342	0.231274	-3.9881	6.66047e-05	0.00288085
chr1:15152031-15154848	344.015	-0.765612	0.192016	-3.98724	6.68474e-05	0.00288703
chr22:11027424-11028855	44.576	1.28192	0.32157	3.98644	6.70724e-05	0.00289242
chr1:69834485-69835164	15.5777	1.42186	0.356739	3.98571	6.72775e-05	0.0028937
chr7:98616315-98618498	121.026	-0.962993	0.241617	-3.98563	6.73023e-05	0.0028937
chr4:2040280-2043874	428.853	-0.772437	0.193841	-3.9849	6.75094e-05	0.00289829
chr10:5887775-5891737	574.921	-0.674545	0.169344	-3.98328	6.79706e-05	0.00291366
chr15:99104582-99106798	224.196	-0.866073	0.217446	-3.98294	6.8069e-05	0.00291366
chr15:33967950-33973068	271.642	0.917162	0.23032	3.98212	6.83029e-05	0.00291934
chr1:51989074-51991238	134.148	-0.839561	0.210984	-3.97927	6.91263e-05	0.00294166
chr15:18461318-18461574	18.5304	1.42241	0.357456	3.97926	6.91304e-05	0.00294166
chr22:11372217-11373054	16.4277	1.4187	0.356492	3.97961	6.90292e-05	0.00294166
chr20:56628595-56632052	181.03	-0.888162	0.223281	-3.97778	6.95625e-05	0.00295569
chr2:241685337-241688929	737.908	-0.558709	0.140478	-3.9772	6.9732e-05	0.00295642
chr5:176198908-176200313	90.4526	-1.04843	0.263622	-3.97702	6.97844e-05	0.00295642
chr22:37745160-37747822	221.832	-0.857582	0.215693	-3.97593	7.01045e-05	0.00296564
chr13:16647738-16648406	34.6273	1.35667	0.341307	3.97492	7.04031e-05	0.00296957
chr18:22168596-22171505	161.105	-0.879683	0.221304	-3.97499	7.03821e-05	0.00296957
chr17:29586901-29598190	800.466	-0.676043	0.170112	-3.97411	7.06419e-05	0.00297097
chr19:19137192-19138883	222.869	-0.792903	0.199507	-3.97431	7.0584e-05	0.00297097
chr17:2396031-2402893	1007.34	-0.6326	0.159207	-3.97345	7.08382e-05	0.0029749
chr1:8867918-8880297	912.351	-0.597281	0.150367	-3.97216	7.1225e-05	0.00298624
chr11:64225058-64227768	331.455	-0.791007	0.199153	-3.97186	7.1315e-05	0.00298624
chr1:155078190-155083438	703.256	-0.694592	0.174951	-3.9702	7.18131e-05	0.00299972
chr7:60019362-60019759	41.9162	1.32182	0.332945	3.97009	7.18447e-05	0.00299972
chr9:135480083-135482264	263.791	-0.80271	0.202209	-3.96971	7.19591e-05	0.00300017
chr3:47577208-47579720	189.389	-0.865469	0.218058	-3.96899	7.21776e-05	0.00300494
chr2:103873812-103877262	95.0015	1.01973	0.256948	3.96861	7.22921e-05	0.00300537
chr1:124309597-124309903	40.6339	1.28119	0.32291	3.96764	7.25866e-05	0.00301188
chr2:74528085-74531815	639.017	-0.726953	0.183231	-3.96741	7.2657e-05	0.00301188
chr14:28187828-28188762	22.0253	1.3954	0.351927	3.96502	7.33884e-05	0.00302916
chr2:223943105-223946097	485.912	-0.643827	0.162359	-3.96545	7.32568e-05	0.00302916
chr8:98426319-98428275	161.969	-0.900426	0.227073	-3.96537	7.32837e-05	0.00302916
chr11:119314879-119317833	256.546	-0.857802	0.216476	-3.96258	7.41448e-05	0.00303868
chr17:40362438-40364380	106.119	-0.9525	0.240362	-3.96277	7.40866e-05	0.00303868
chr3:2097526-2101075	393.478	-0.666736	0.168253	-3.9627	7.41056e-05	0.00303868
chr7:72334383-72338313	443.052	-0.747214	0.188513	-3.96373	7.37865e-05	0.00303868
chr9:62837124-62839597	398.445	-0.728849	0.183888	-3.96355	7.38448e-05	0.00303868
chr19:48738362-48741139	192.802	-0.808367	0.204085	-3.96093	7.46576e-05	0.00305536
chr21:7927161-7928982	49.9537	1.27641	0.32239	3.95922	7.51964e-05	0.00307305
chr1:212413122-212415334	324.438	-0.745817	0.188546	-3.95563	7.63337e-05	0.00308785
chr16:88810412-88813098	322.3	-0.807735	0.204212	-3.95538	7.64139e-05	0.00308785
chr19:3358010-3362312	252.388	-0.833558	0.210759	-3.95503	7.65252e-05	0.00308785
chr19:12932126-12934266	388.764	-0.639081	0.1616	-3.95471	7.66271e-05	0.00308785
chr2:219216942-219219783	286.194	-0.791365	0.199969	-3.95744	7.57582e-05	0.00308785
chr21:7950334-7952172	49.5589	1.32453	0.334707	3.95728	7.58078e-05	0.00308785
chr22:50249972-50251899	155.699	-1.00514	0.254096	-3.95575	7.62935e-05	0.00308785
chr5:123035141-123037523	298.488	-0.779602	0.197077	-3.95582	7.62718e-05	0.00308785
chr7:149622393-149625577	481.603	-0.683019	0.17265	-3.95608	7.61898e-05	0.00308785
chrX:64203557-64206668	275.404	-0.778258	0.1967	-3.95658	7.60314e-05	0.00308785
chr14:35532922-35536020	414.205	-0.797579	0.201733	-3.95365	7.69689e-05	0.0030973
chr11:1388347-1389741	135.134	-0.954922	0.24163	-3.95201	7.7499e-05	0.00310642
chr12:121810736-121813600	289.334	-0.703644	0.178045	-3.95205	7.74836e-05	0.00310642
chr14:40953964-40957945	516.889	0.765654	0.193757	3.95162	7.76255e-05	0.00310642
chr8:143616373-143618993	398.99	-0.779239	0.197188	-3.95175	7.75821e-05	0.00310642
chr17:30706820-30712329	853.927	-0.5894	0.149279	-3.94832	7.87014e-05	0.00313644
chr17:81701321-81704676	606.219	-0.740891	0.187636	-3.94855	7.86263e-05	0.00313644
chr20:45405449-45408444	370.206	-0.710307	0.179881	-3.94877	7.85543e-05	0.00313644
chr15:89653889-89655915	302.746	-0.813714	0.206137	-3.94744	7.89916e-05	0.00314367
chr1:2192901-2195626	156.696	-0.845794	0.214424	-3.9445	7.99682e-05	0.00317379
chr3:36870914-36875206	226.032	0.926379	0.234838	3.94476	7.98812e-05	0.00317379
chr12:49055785-49061754	1156.44	-0.557445	0.141337	-3.9441	8.01012e-05	0.00317471
chr19:48390042-48391894	351.846	-0.797926	0.202451	-3.94132	8.10334e-05	0.00319897
chr4:2754547-2756922	143.009	-0.842008	0.213632	-3.9414	8.10089e-05	0.00319897
chr6:43508473-43510926	217.407	-0.850125	0.215697	-3.94129	8.10455e-05	0.00319897
chr10:79347022-79349121	201.117	-0.811722	0.206086	-3.93875	8.19068e-05	0.00322662
chr16:4612875-4617846	510.721	-0.67967	0.172579	-3.93831	8.20587e-05	0.00322662
chr8:22108299-22110518	290.274	-0.709842	0.180243	-3.93824	8.20811e-05	0.00322662
chr1:122633445-122634785	69.3096	1.21719	0.309134	3.93742	8.23638e-05	0.00322895
chr3:195258904-195261246	175.615	-0.928999	0.235935	-3.93752	8.2329e-05	0.00322895
chr11:118144833-118146564	117.928	-0.995357	0.252819	-3.93703	8.2496e-05	0.00322975
chr7:94907247-94916249	1003.25	0.571945	0.145286	3.93668	8.26168e-05	0.00323011
chr7:140229806-140232839	264.07	-0.73495	0.186714	-3.93624	8.27688e-05	0.00323167
chr22:49824827-49827463	357.281	-0.748319	0.190134	-3.93575	8.29387e-05	0.00323394
chr19:12799814-12802868	506.122	-0.74542	0.189467	-3.9343	8.34394e-05	0.00324908
chr19:40190354-40195174	453.028	-0.70361	0.178916	-3.93264	8.40193e-05	0.00325848
chr19:55484232-55487949	288.624	-0.838335	0.213163	-3.93284	8.39494e-05	0.00325848
chr3:196967607-196970446	249.838	-0.809971	0.205953	-3.93279	8.39639e-05	0.00325848
chr13:102772315-102774445	274.508	-0.812032	0.20655	-3.93141	8.44482e-05	0.00326198
chr17:75269190-75272806	456.208	-0.8147	0.207214	-3.93169	8.43517e-05	0.00326198
chr6:5084260-5086641	154.826	-0.950049	0.241639	-3.93168	8.43541e-05	0.00326198
chr1:122943015-122944217	46.7803	1.30578	0.332339	3.92905	8.52835e-05	0.00328734
chr19:6277332-6280939	337.088	-0.687641	0.175035	-3.92859	8.54459e-05	0.00328734
chr19:13148204-13155786	1196.15	-0.61724	0.157114	-3.92862	8.54361e-05	0.00328734
chr5:1385449-1386843	95.9668	-0.968813	0.246644	-3.92798	8.5661e-05	0.00329123
chr1:124317753-124319458	66.7848	1.24799	0.317909	3.92563	8.65016e-05	0.00330518
chr1:124716903-124717281	28.5393	1.33412	0.339862	3.92546	8.6564e-05	0.00330518
chr17:4996794-5000066	434.34	-0.773744	0.197057	-3.9265	8.61894e-05	0.00330518
chr17:78838553-78842076	601.808	-0.665599	0.16957	-3.92521	8.66529e-05	0.00330518
chr22:20316729-20322022	685.201	-0.660613	0.168258	-3.9262	8.62968e-05	0.00330518
chr5:692479-694382	180.993	-0.90205	0.229818	-3.92505	8.67104e-05	0.00330518
chr19:3093582-3097365	381.303	-0.746977	0.190378	-3.92366	8.72154e-05	0.00330638
chr22:21629012-21630619	238.008	-0.863081	0.219984	-3.92338	8.73141e-05	0.00330638
chr4:335618-340718	719.944	-0.611216	0.155759	-3.92411	8.70527e-05	0.00330638
chr5:112800298-112804031	156.767	0.97962	0.249647	3.92402	8.70823e-05	0.00330638
chr9:136726013-136729406	561.586	-0.642718	0.163813	-3.9235	8.72719e-05	0.00330638
chr19:1171242-1174752	213.162	-0.784638	0.20003	-3.92261	8.75952e-05	0.00331268
chr1:1692208-1693399	152.39	-0.969326	0.247201	-3.9212	8.81089e-05	0.00331892
chr1:44028971-44032120	438.143	-0.687895	0.175414	-3.92155	8.79803e-05	0.00331892
chr10:40447132-40447499	71.5028	1.22192	0.311621	3.92116	8.81225e-05	0.00331892
chr15:34581386-34584714	536.803	-0.714735	0.182289	-3.9209	8.82195e-05	0.00331892
chr5:177468154-177474412	595.444	-0.705502	0.179949	-3.92057	8.83383e-05	0.00331906
chr1:124261066-124262198	33.1135	1.31307	0.33502	3.91939	8.87727e-05	0.00332506
chr4:2416205-2419972	281.046	-0.70577	0.180057	-3.91969	8.86613e-05	0.00332506
chr9:3180720-3181919	59.397	-1.16568	0.297428	-3.9192	8.88431e-05	0.00332506
chr19:10601799-10604445	376.231	-0.724766	0.185016	-3.91731	8.9541e-05	0.00334252
chr5:1521590-1524860	328.101	-0.714934	0.182496	-3.91753	8.94598e-05	0.00334252
chr19:29664869-29666425	127.31	-0.981363	0.250544	-3.91693	8.96823e-05	0.00334347
chr19:39831515-39834728	495.112	-0.693795	0.177176	-3.91585	9.00873e-05	0.00334992
chr6:24887352-24889607	58.6052	1.1724	0.299383	3.91607	9.00049e-05	0.00334992
chr20:62404663-62408052	280.528	-0.77946	0.199104	-3.91484	9.04646e-05	0.00335963
chr10:18399948-18404333	334.174	0.65158	0.166493	3.91355	9.09479e-05	0.00336892
chr22:45502245-45506175	305.843	-0.73251	0.18717	-3.91362	9.09239e-05	0.00336892
chr1:124054298-124054940	66.3907	1.24985	0.319421	3.91287	9.12046e-05	0.00336979
chr10:131971183-131983400	803.172	-0.678891	0.173497	-3.91298	9.11632e-05	0.00336979
chr1:123527809-123528147	46.1428	1.34509	0.343884	3.91147	9.17366e-05	0.00337928
chr10:69317500-69327388	779.133	-0.581797	0.148761	-3.91096	9.19293e-05	0.00337928
chr17:67376145-67380228	736.562	-0.669228	0.171103	-3.91127	9.18134e-05	0.00337928
chr19:2840462-2843542	438.926	-0.720568	0.184209	-3.91169	9.16523e-05	0.00337928
chr1:123756385-123756847	32.0947	1.28154	0.327833	3.90911	9.2635e-05	0.00339746
chr3:198079517-198081927	239.235	-0.833662	0.213264	-3.90905	9.2659e-05	0.00339746
chr1:12229604-12232645	422.915	-0.755191	0.19326	-3.90764	9.32036e-05	0.00340878
chr9:36135724-36138165	290.842	-0.794843	0.203395	-3.90789	9.31071e-05	0.00340878
chr19:13763649-13766095	182.479	-0.8382	0.214612	-3.90566	9.3969e-05	0.00342809
chr7:37446885-37449875	395.08	-0.752468	0.192651	-3.90585	9.38939e-05	0.00342809
chr14:69258756-69262893	538.547	-0.66702	0.170803	-3.9052	9.41487e-05	0.00343031
chr11:47407416-47409880	363.591	-0.671206	0.171899	-3.90465	9.43622e-05	0.00343376
chr2:219569569-219571974	176.586	-0.845777	0.216669	-3.90354	9.4797e-05	0.00344139
chrY:56878358-56879186	26.18	1.35527	0.347192	3.9035	9.48101e-05	0.00344139
chr9:137167618-137170406	162.528	-0.862343	0.220961	-3.9027	9.51256e-05	0.00344851
chr6:170285595-170297550	1265.23	-0.598804	0.153446	-3.90236	9.52587e-05	0.00344901
chr1:123608298-123608552	17.1827	1.38467	0.354897	3.90162	9.55513e-05	0.00345095
chr9:127714322-127716636	345.168	-0.761503	0.195171	-3.90172	9.55104e-05	0.00345095
chr17:75763765-75765454	138.406	-0.896108	0.229733	-3.90065	9.59341e-05	0.00346046
chr1:11923658-11926933	359.005	-0.70335	0.180345	-3.90003	9.61798e-05	0.00346499
chr16:75264132-75266844	351.986	-0.786142	0.201707	-3.89745	9.72128e-05	0.00349785
chr12:111367047-111369833	460.242	-0.724518	0.185911	-3.89711	9.73464e-05	0.0034983
chr9:136711472-136714599	378.775	-0.784508	0.201325	-3.89673	9.75017e-05	0.00349952
chr1:26499823-26501999	300.41	-0.792136	0.203477	-3.893	9.90127e-05	0.00350585
chr1:124348507-124348828	28.5966	1.36321	0.350167	3.89304	9.89958e-05	0.00350585
chr11:65040257-65043374	399.864	-0.625216	0.160584	-3.89339	9.88529e-05	0.00350585
chr17:178798-182301	255.125	-0.746288	0.191648	-3.89405	9.85825e-05	0.00350585
chr17:79182148-79184503	170.377	-0.900884	0.231382	-3.89349	9.88115e-05	0.00350585
chr19:41264198-41267838	559.214	-0.667838	0.171538	-3.89325	9.89118e-05	0.00350585
chr20:5315285-5317421	162.801	-0.876197	0.225017	-3.89391	9.86398e-05	0.00350585
chr20:28307976-28308345	53.2384	1.2417	0.318875	3.89399	9.86093e-05	0.00350585
chr5:175795711-175798839	415.41	-0.67925	0.174447	-3.89374	9.87106e-05	0.00350585
chr9:34585658-34590981	646.198	-0.604371	0.155166	-3.895	9.82005e-05	0.00350585
chr9:137617252-137618919	281.139	-0.793486	0.203764	-3.89413	9.85503e-05	0.00350585
chr1:124686294-124687465	54.7961	1.27428	0.327356	3.89265	9.91547e-05	0.00350658
chr10:42091292-42092914	63.8825	1.16618	0.299708	3.89104	9.98138e-05	0.00352558
chr19:14202571-14208118	609.607	-0.669074	0.171989	-3.89021	0.000100158	0.00353341
chr19:55450535-55453752	333.763	-0.695503	0.178838	-3.88902	0.000100652	0.00354651
chr13:32426689-32428749	137.917	-0.84631	0.217655	-3.88832	0.000100942	0.00355005
chr14:23351066-23353618	383.212	-0.721919	0.185683	-3.88791	0.000101112	0.00355005
chr16:10180627-10184045	254.034	-0.86452	0.2224	-3.88722	0.000101397	0.00355005
chr18:79797410-79799246	109.379	-0.917844	0.236122	-3.88716	0.000101422	0.00355005
chr5:141634463-141639043	729.055	-0.680214	0.17502	-3.8865	0.0001017	0.00355005
chr5:161846299-161852944	706.037	0.575733	0.148112	3.88714	0.000101434	0.00355005
chr6:166380780-166384956	827.37	-0.566558	0.145779	-3.88642	0.000101735	0.00355005
chr9:132877378-132879674	345.275	-0.72476	0.186479	-3.88656	0.000101676	0.00355005
chr17:82291748-82294738	324.506	-0.701561	0.180693	-3.88261	0.00010334	0.0036017
chr12:57735199-57741342	459.468	-0.641913	0.165389	-3.88123	0.000103929	0.003611
chr17:29565474-29570000	338.179	-0.719985	0.185492	-3.8815	0.000103816	0.003611
chr9:124867610-124871400	781.356	-0.672267	0.173215	-3.88111	0.000103982	0.003611
chr19:15430564-15433845	352.782	-0.738409	0.190299	-3.88026	0.000104345	0.00361927
chr19:33621379-33623781	197.516	-0.912965	0.235409	-3.8782	0.00010523	0.00364121
chr19:54414760-54419277	549.073	-0.672026	0.173282	-3.87822	0.000105225	0.00364121
chr19:41957708-41960066	312.639	-0.783709	0.202132	-3.87722	0.000105655	0.00364893
chr2:241506477-241510008	472.245	-0.745875	0.192379	-3.87711	0.000105706	0.00364893
chr1:122694596-122695156	38.7554	1.29098	0.333001	3.8768	0.000105838	0.00364915
chr8:12560883-12562164	33.4152	1.29324	0.333617	3.87643	0.000106001	0.00365041
chr8:143158435-143161325	292.177	-0.822808	0.212311	-3.87548	0.000106416	0.00365596
chrX:78747243-78750246	172.886	0.821087	0.211858	3.87566	0.000106338	0.00365596
chr14:104985018-104987466	248.608	-0.839674	0.216721	-3.87444	0.000106868	0.00366715
chr11:3055144-3058394	428.518	-0.70137	0.181143	-3.87191	0.000107986	0.00369672
chr9:15305977-15308115	347.809	-0.729645	0.188439	-3.87205	0.000107923	0.00369672
chr15:78619738-78621645	186.74	-0.835954	0.215971	-3.87068	0.000108533	0.00370309
chr5:149729706-149733244	586.791	-0.667366	0.172418	-3.87063	0.000108556	0.00370309
chr8:53879151-53883245	570.264	-0.726261	0.187611	-3.8711	0.000108345	0.00370309
chr6:31270863-31273000	192.078	-0.901521	0.232939	-3.8702	0.000108746	0.0037052
chr1:153774809-153777398	346.758	-0.777344	0.200889	-3.86952	0.000109048	0.00370903
chr17:44323237-44327218	379.292	-0.69714	0.180169	-3.86937	0.000109116	0.00370903
chr22:44496664-44499070	235.764	-0.767269	0.198324	-3.86876	0.000109392	0.00370969
chr8:85659777-85660898	51.9831	1.21824	0.314893	3.86876	0.000109391	0.00370969
chr17:34578415-34583346	707.836	-0.688541	0.177992	-3.86838	0.000109563	0.00370986
chr6:168440459-168443092	176.406	-0.868148	0.224434	-3.86817	0.000109654	0.00370986
chr1:122791521-122792128	25.3194	1.33236	0.344526	3.86723	0.000110081	0.00371561
chr6:30258939-30260868	267.381	-0.776879	0.200879	-3.86739	0.000110007	0.00371561
chr11:64290785-64293318	205.605	-0.86332	0.223265	-3.8668	0.000110272	0.00371774
chr20:28823814-28824796	35.3112	1.30271	0.33702	3.86537	0.000110922	0.00373528
chr20:3202630-3205222	435.168	-0.717771	0.185711	-3.86498	0.000111097	0.00373682
chr18:5627376-5631076	573.796	-0.646777	0.16743	-3.86296	0.00011202	0.00376349
chr10:41264902-41265649	47.0691	1.24427	0.322167	3.86218	0.000112381	0.00376932
chr17:39753522-39755357	144.489	-0.933409	0.241734	-3.8613	0.000112785	0.00376932
chr20:63004565-63007866	93.3031	-0.945496	0.244873	-3.86117	0.000112846	0.00376932
chr21:10802164-10804796	79.779	1.20838	0.312919	3.86163	0.000112632	0.00376932
chr9:128701990-128703718	143.492	-0.905908	0.23457	-3.86199	0.000112465	0.00376932
chr1:124499154-124499685	42.9811	1.24338	0.322055	3.86078	0.000113025	0.00377094
chr19:35642748-35645532	295.489	-0.716821	0.185682	-3.86048	0.000113166	0.00377128
chr17:78378055-78380645	463.347	-0.663383	0.171909	-3.85891	0.000113892	0.00378673
chr9:133989901-133993874	446.611	-0.768165	0.199051	-3.85914	0.000113788	0.00378673
chr4:49651163-49654229	131.154	1.05028	0.272193	3.85859	0.000114041	0.00378735
chr11:1762551-1764831	297.47	-0.845552	0.21922	-3.8571	0.00011474	0.00380618
chr14:106344496-106348387	109.642	1.14256	0.296267	3.85652	0.000115014	0.00381088
chr16:67162384-67166032	238.495	-0.771785	0.200268	-3.85375	0.000116321	0.0038366
chr16:67191640-67193989	395.737	-0.654864	0.169921	-3.85393	0.000116239	0.0038366
chr17:62626572-62629563	254.285	-0.790273	0.20504	-3.85423	0.000116093	0.0038366
chr21:10687520-10688695	25.033	1.34317	0.348472	3.85447	0.000115981	0.0038366
chr12:6913538-6917388	341.785	-0.664071	0.17238	-3.85238	0.000116978	0.00385298
chr16:22205615-22208378	396.64	-0.671254	0.174254	-3.85215	0.000117084	0.00385298
chr15:40281496-40283718	83.4984	-1.01191	0.262784	-3.85075	0.000117756	0.00386698
chr3:129603873-129606617	108.66	-1.03724	0.269384	-3.85043	0.000117911	0.00386698
chr4:9531900-9533280	112.896	-0.956758	0.24848	-3.85044	0.000117907	0.00386698
chr3:49673027-49675613	414.127	-0.807249	0.209674	-3.85002	0.00011811	0.00386909
chr21:10446782-10447305	15.728	1.37492	0.357265	3.84845	0.000118867	0.00388948
chr12:132685242-132688515	360.328	-0.649803	0.168878	-3.84778	0.000119195	0.00389582
chr5:134000832-134006485	701.749	-0.58225	0.151352	-3.84699	0.000119576	0.00390387
chr19:13905481-13907751	256.757	-0.71983	0.187212	-3.84499	0.000120558	0.00393147
chr12:51819571-51822542	173.715	-0.797598	0.207486	-3.8441	0.000120997	0.00394133
chr22:46150682-46152400	229.982	-0.796164	0.207146	-3.84349	0.000121296	0.00394662
chr10:41124863-41125464	76.2906	1.22582	0.318993	3.84277	0.000121652	0.00395332
chr10:113678851-113681057	313.819	-0.785122	0.204325	-3.84252	0.000121779	0.00395332
chr21:46320675-46326865	959.784	-0.587632	0.15294	-3.84225	0.000121912	0.00395332
chr10:119817863-119821869	269.013	0.746349	0.19428	3.84161	0.000122232	0.00395926
chr19:35855872-35857883	133.665	-0.839521	0.218564	-3.84108	0.000122496	0.00396334
chr5:180351636-180354579	384.519	-0.765806	0.199397	-3.84062	0.000122724	0.0039663
chr7:99374440-99375769	46.2261	-1.17058	0.304927	-3.83889	0.000123592	0.00398988
chr5:10441028-10442972	289.633	-0.678193	0.176683	-3.83847	0.000123803	0.00399225
chr1:124770859-124771300	83.2549	1.1454	0.298592	3.83602	0.000125042	0.00402483
chr9:128189858-128192570	274.694	-0.739916	0.192891	-3.83592	0.000125093	0.00402483
chr15:77326216-77328129	51.7815	1.24313	0.3241	3.83565	0.000125234	0.0040249
chr16:11254261-11257152	241.729	-0.82452	0.215105	-3.8331	0.00012654	0.00404439
chr19:46714966-46717926	202.188	-0.757906	0.197671	-3.83418	0.000125984	0.00404439
chr19:58360927-58363533	428.956	-0.724961	0.189097	-3.8338	0.000126178	0.00404439
chr20:61251531-61255854	475.739	-0.66282	0.172918	-3.83314	0.00012652	0.00404439
chr8:143367952-143370347	245.344	-0.718912	0.187529	-3.83359	0.000126285	0.00404439
chr20:44309341-44311828	316.891	-0.721991	0.188435	-3.83152	0.000127352	0.00406584
chr20:29091274-29092509	25.206	1.33034	0.347248	3.83109	0.000127575	0.00406845
chr1:124225191-124225577	40.4947	1.33363	0.348219	3.82985	0.000128221	0.00408228
chr17:7218978-7221408	306.622	-0.739952	0.193213	-3.82972	0.000128291	0.00408228
chr13:16162837-16164798	65.7578	1.19608	0.312406	3.8286	0.000128876	0.00409162
chr16:88531876-88535589	200.318	-0.868013	0.226725	-3.82849	0.000128932	0.00409162
chr8:144825580-144829278	541.636	-0.678314	0.177182	-3.82834	0.000129009	0.00409162
chr16:2459055-2461131	268.696	-0.796514	0.208092	-3.82771	0.000129341	0.00409765
chr21:10660122-10661745	42.0822	1.22116	0.319092	3.82699	0.000129719	0.00410511
chr12:31116279-31120537	442.863	-0.642287	0.167856	-3.82642	0.00013002	0.00410959
chr21:10352176-10354881	63.657	1.23212	0.322022	3.82618	0.000130145	0.00410959
chr1:123369845-123370523	41.9275	1.2027	0.314524	3.82385	0.000131381	0.00411067
chr1:123676699-123677903	67.9141	1.23615	0.323163	3.82516	0.000130689	0.00411067
chr11:45803652-45809108	559.868	-0.649863	0.169968	-3.82345	0.000131597	0.00411067
chr11:61889826-61892454	259.885	-0.778257	0.203502	-3.82433	0.00013113	0.00411067
chr14:102516402-102517769	115.301	-0.905041	0.236709	-3.82344	0.000131602	0.00411067
chr17:2391794-2394407	260.386	-0.709243	0.185468	-3.82407	0.000131267	0.00411067
chr20:62641699-62643865	193.253	-0.838058	0.219071	-3.82551	0.0001305	0.00411067
chr3:107701941-107707847	332.718	0.713319	0.18649	3.82497	0.000130788	0.00411067
chr4:1793357-1796088	115.38	-0.943531	0.246753	-3.82379	0.000131418	0.00411067
chr5:1592893-1595396	310.524	-0.81044	0.21192	-3.82427	0.00013116	0.00411067
chr7:516324-522750	407.21	-0.641942	0.167952	-3.82217	0.00013228	0.00412739
chr11:1567397-1571894	343.108	-0.835153	0.218599	-3.82049	0.000133189	0.00413343
chr17:82031945-82032944	114.555	-0.958693	0.250903	-3.82097	0.00013293	0.00413343
chr21:8228517-8228946	97.3435	1.10394	0.288933	3.82075	0.000133048	0.00413343
chr8:142776216-142778250	140.445	-0.923321	0.241664	-3.82067	0.000133088	0.00413343
chr9:120928372-120929571	67.6837	-1.07804	0.282131	-3.82105	0.000132887	0.00413343
chr12:128820568-128825427	603.195	-0.546637	0.143146	-3.81872	0.000134144	0.0041586
chr1:123551608-123551864	24.4819	1.32847	0.347977	3.81769	0.000134709	0.00416933
chr16:58462820-58466790	476.079	-0.679635	0.178041	-3.8173	0.000134923	0.00416933
chrY:56859367-56860534	41.265	1.26381	0.331059	3.81747	0.000134828	0.00416933
chr19:35994492-35997073	328.058	-0.736703	0.193072	-3.81569	0.000135804	0.00419209
chr10:73810081-73812560	308.057	-0.67514	0.177041	-3.81347	0.000137027	0.00422081
chr2:96144197-96145803	91.1018	-0.981367	0.257336	-3.81356	0.000136981	0.00422081
chr19:33794415-33799566	711.047	-0.663442	0.174024	-3.81237	0.000137643	0.00422314
chr20:844202-848394	308.055	-0.706657	0.185345	-3.81267	0.000137476	0.00422314
chr21:10785193-10786459	32.4124	1.29336	0.339251	3.81239	0.00013763	0.00422314
chr6:163425912-163432518	201.037	0.925489	0.242765	3.81229	0.000137687	0.00422314
chr20:36858623-36864755	565.042	-0.591311	0.155118	-3.812	0.000137845	0.0042235
chr15:20414541-20415752	28.9852	1.28209	0.336441	3.81076	0.000138542	0.00424035
chr7:78487589-78490382	133.348	0.844121	0.221575	3.80964	0.000139167	0.00425498
chr15:20647386-20648727	34.555	1.32951	0.349034	3.8091	0.000139474	0.00425536
chr5:178231060-178233411	350.161	-0.794391	0.208548	-3.80915	0.000139445	0.00425536
chr13:17167504-17168480	20.2902	1.35589	0.355999	3.8087	0.0001397	0.00425776
chr8:143634714-143637883	582.468	-0.642745	0.168776	-3.80827	0.00013994	0.00426057
chr19:1882954-1885819	335.115	-0.754004	0.198092	-3.80632	0.000141047	0.0042885
chr19:47512385-47515177	413.829	-0.688749	0.180957	-3.80614	0.000141154	0.0042885
chr14:67513566-67516058	237.228	-0.813961	0.214024	-3.80312	0.000142884	0.00433649
chr17:3666615-3670461	760.067	-0.677372	0.178148	-3.8023	0.000143358	0.00434178
chr17:75130265-75132491	258.466	-0.835773	0.219795	-3.80251	0.000143239	0.00434178
chr1:1018871-1021670	138.448	-0.861493	0.226669	-3.80067	0.000144308	0.00435684
chr1:123094910-123095579	25.0807	1.31277	0.345365	3.80112	0.000144044	0.00435684
chr17:74970843-74973415	261.906	-0.788963	0.207584	-3.80069	0.000144296	0.00435684
chr19:6500871-6503074	282.066	-0.810924	0.213422	-3.79964	0.000144909	0.00436725
chr2:25249257-25253485	432.912	-0.642231	0.169036	-3.79937	0.000145064	0.00436725
chr9:125907782-125911809	109.111	0.937054	0.246639	3.7993	0.000145106	0.00436725
chr3:49801821-49804805	243.909	-0.767216	0.201982	-3.79844	0.000145612	0.00437566
chr9:129035820-129038148	299.442	-0.77636	0.204396	-3.79831	0.000145689	0.00437566
chr1:122912368-122912955	102.805	1.15195	0.303481	3.79577	0.000147185	0.00441011
chr11:65886297-65892867	820.75	-0.618627	0.16299	-3.79548	0.000147355	0.00441011
chr19:31346449-31352306	474.933	-0.654022	0.172323	-3.79533	0.000147446	0.00441011
chr3:48552801-48558054	359.794	-0.618537	0.16297	-3.7954	0.000147408	0.00441011
chr11:65718763-65720949	267.956	-0.794369	0.209316	-3.79506	0.000147606	0.00441033
chr19:49148844-49152060	393.673	-0.749854	0.197622	-3.79438	0.000148015	0.00441797
chr10:74957094-74958392	40.374	1.15471	0.304372	3.79374	0.000148398	0.00442482
chr1:26034582-26036567	359.747	-0.77691	0.204845	-3.79267	0.000149034	0.00443922
chr19:983810-985334	215.537	-0.817344	0.21553	-3.79225	0.000149287	0.00444218
chr1:123195543-123195883	46.3069	1.26759	0.334321	3.79155	0.000149712	0.00444566
chr21:5128105-5128701	62.6014	-1.07646	0.283901	-3.79167	0.000149637	0.00444566
chr19:10251160-10253706	488.449	-0.613489	0.161905	-3.78919	0.000151137	0.00447876
chr2:240451545-240453307	89.0124	-1.04428	0.275577	-3.78941	0.000151003	0.00447876
chr1:124639489-124641478	63.8886	1.17793	0.311007	3.78748	0.000152185	0.00449198
chr15:90200270-90203658	577.384	-0.679669	0.179465	-3.78719	0.00015236	0.00449198
chr16:2428259-2431973	583.348	-0.625783	0.165229	-3.78737	0.000152251	0.00449198
chr19:1018403-1022248	350.717	-0.714752	0.18871	-3.78757	0.000152127	0.00449198
chr20:63214046-63217200	476.09	-0.594033	0.15683	-3.78776	0.000152014	0.00449198
chr1:121752824-121754116	31.1956	1.28495	0.339514	3.78468	0.000153905	0.00452565
chr13:18011549-18011971	22.9845	1.30269	0.344211	3.78457	0.000153972	0.00452565
chr15:20659290-20662224	67.2175	1.20239	0.317689	3.78479	0.000153836	0.00452565
chr10:133307116-133310119	528.589	-0.609822	0.161242	-3.78202	0.000155558	0.00456398
chr13:17231273-17232260	39.3225	1.26749	0.335142	3.78194	0.000155612	0.00456398
chr20:3045128-3048054	451.629	-0.769634	0.203528	-3.78147	0.000155908	0.00456398
chr4:7041185-7046644	704.929	-0.675143	0.178528	-3.78171	0.000155752	0.00456398
chr16:8865509-8869744	771.524	-0.593871	0.15706	-3.78118	0.000156088	0.00456462
chr10:110642986-110645152	193.833	-0.804604	0.212885	-3.77952	0.000157134	0.00456747
chr11:505133-508668	502.283	-0.687512	0.181899	-3.77963	0.00015706	0.00456747
chr11:73306855-73309994	304.113	-0.735938	0.19469	-3.78006	0.000156791	0.00456747
chr17:50145483-50152824	969.571	-0.593807	0.157111	-3.77954	0.000157118	0.00456747
chr19:1448729-1454284	587.284	-0.699825	0.185148	-3.77981	0.000156945	0.00456747
chr7:99437571-99441056	561.384	-0.59636	0.157737	-3.78073	0.000156369	0.00456747
chr17:81164785-81166102	72.2228	-1.03803	0.27473	-3.77835	0.000157874	0.00457989
chr7:66739456-66742859	695.676	-0.597953	0.158269	-3.77809	0.000158037	0.00457989
chr8:133569114-133573700	613.469	-0.747758	0.197913	-3.77823	0.000157949	0.00457989
chr9:97981996-97986248	552.41	-0.600948	0.159087	-3.77748	0.000158421	0.00458642
chr20:3238057-3240256	145.482	-0.931768	0.246767	-3.77591	0.000159426	0.0046109
chr2:165239148-165243202	582.865	0.750555	0.198814	3.77516	0.000159904	0.00461548
chrX:56617664-56621447	255.181	0.828437	0.219434	3.77533	0.000159793	0.00461548
chr1:124591390-124592191	46.8043	1.24005	0.328652	3.77315	0.0001612	0.00464824
chr12:109051913-109054986	502.472	-0.583876	0.154766	-3.77264	0.000161529	0.00465311
chr17:15944171-15946994	168.007	-0.851172	0.225668	-3.77179	0.000162081	0.00466436
chr11:65116232-65118289	223.628	-0.808856	0.21449	-3.77106	0.000162555	0.0046711
chr22:20980902-20983823	505.416	-0.683004	0.181123	-3.77093	0.000162639	0.0046711
chr10:73872822-73875455	211.809	-0.714558	0.189542	-3.76992	0.0001633	0.00468052
chr15:65375285-65378951	444.368	-0.678731	0.18005	-3.76969	0.000163453	0.00468052
chr9:121698197-121703392	474.46	-0.666112	0.176698	-3.76978	0.000163395	0.00468052
chr1:28259073-28262085	451.394	-0.677369	0.17976	-3.76819	0.000164438	0.00469943
chr12:123670581-123672562	301.898	-0.646266	0.171505	-3.7682	0.000164429	0.00469943
chr1:124923204-124923448	26.115	1.32072	0.350522	3.76788	0.000164641	0.00470056
chr19:1239630-1243537	264.007	-0.759791	0.201756	-3.76588	0.000165962	0.00473361
chr16:49279406-49284563	488.979	-0.619512	0.164518	-3.76561	0.000166141	0.00473403
chr1:124614972-124615324	51.3495	1.26679	0.336481	3.76482	0.000166668	0.00474437
chr13:109783268-109790488	554.752	-0.612264	0.162666	-3.76393	0.000167262	0.00475659
chr6:97465002-97467208	67.1909	1.00653	0.267439	3.76357	0.000167508	0.0047589
chr15:60590078-60593424	253.573	-0.721428	0.191717	-3.76299	0.000167895	0.00476522
chr19:14135102-14138374	322.458	-0.733777	0.195022	-3.76254	0.000168196	0.00476906
chr1:123443360-123443963	33.7973	1.31342	0.349289	3.76026	0.000169736	0.00479521
chr15:90870608-90873433	354.572	-0.672406	0.178822	-3.76019	0.000169782	0.00479521
chr2:186717322-186719819	86.6715	0.952961	0.253407	3.7606	0.000169506	0.00479521
chr8:144797890-144800513	381.181	-0.692669	0.184176	-3.76091	0.000169294	0.00479521
chr21:38660064-38661753	79.5474	-0.989132	0.26309	-3.75967	0.000170138	0.00480058
chr2:136764109-136767535	323.805	-0.673063	0.179099	-3.75804	0.000171249	0.0048272
chr1:123626797-123627142	27.0646	1.30929	0.348477	3.75718	0.000171836	0.00483903
chr11:114449998-114450924	24.8047	1.27223	0.338662	3.75663	0.000172219	0.0048451
chr5:890596-894186	467.651	-0.697804	0.18579	-3.75588	0.000172734	0.00485485
chr10:119541877-119544409	227.134	-0.799536	0.212935	-3.75484	0.000173453	0.00487035
chr16:968031-971397	259.259	-0.77984	0.207707	-3.75452	0.000173676	0.00487188
chr1:248837264-248840518	490.688	-0.669925	0.178455	-3.75404	0.000174008	0.00487211
chr4:930213-934190	709.689	-0.541322	0.144198	-3.75402	0.000174022	0.00487211
chr11:67467861-67469981	280.614	-0.757083	0.201693	-3.75364	0.000174288	0.00487483
chr13:16245704-16246720	43.9169	1.2425	0.331131	3.75228	0.00017523	0.00488762
chr17:28371065-28374920	530.035	-0.604668	0.161169	-3.75177	0.000175591	0.00488762
chr19:15377044-15380814	769.415	-0.581352	0.154943	-3.75204	0.000175398	0.00488762
chr19:42251602-42256788	517.518	-0.709566	0.18912	-3.75194	0.000175468	0.00488762
chr20:29094171-29095856	40.2313	1.2775	0.340485	3.752	0.000175428	0.00488762
chr14:91252696-91254237	136.858	-0.843462	0.224907	-3.75028	0.000176639	0.00491207
chr21:10325849-10330665	109.851	1.0889	0.290415	3.74946	0.000177213	0.00492329
chr15:65027813-65030042	390.745	-0.60798	0.162164	-3.74917	0.000177417	0.00492423
chr8:7610995-7611959	161.57	-0.884805	0.23604	-3.74853	0.000177873	0.00493213
chr7:45086794-45090669	416.882	-0.678813	0.181109	-3.7481	0.000178178	0.00493585
chr1:50332702-50334114	84.3771	-0.921799	0.245979	-3.74748	0.000178622	0.00494343
chr11:114058798-114062083	351.293	-0.761184	0.203147	-3.74696	0.000178988	0.00494406
chr19:27356591-27357332	22.0626	1.33591	0.356517	3.74711	0.000178883	0.00494406
chr8:145050947-145054063	487.222	-0.673883	0.179867	-3.74655	0.00017928	0.00494741
chr1:123790103-123790666	34.3905	1.25861	0.335993	3.74595	0.00017971	0.00495116
chr8:144093284-144096584	449.641	-0.691572	0.184622	-3.74589	0.000179759	0.00495116
chr13:16137988-16138875	22.1083	1.31395	0.350826	3.74531	0.000180174	0.00495788
chr11:118529116-118532987	723.438	-0.600725	0.160433	-3.7444	0.000180825	0.00497105
chr9:40105618-40107450	181.918	-0.807493	0.215713	-3.74337	0.000181566	0.00498667
chr1:212284266-212288177	717.131	-0.529145	0.141376	-3.74282	0.000181964	0.00499285
chr2:127218444-127221113	322.342	-0.685956	0.183353	-3.74118	0.00018316	0.00502092
chr17:7571521-7575587	676.938	-0.577829	0.154485	-3.74035	0.000183766	0.00502798
chr5:177514591-177517917	535.322	-0.667573	0.178477	-3.74038	0.000183743	0.00502798
chr16:2881741-2884551	420.934	-0.70451	0.188394	-3.73957	0.000184337	0.00503633
chr19:16625987-16629775	582.093	-0.656887	0.175674	-3.73925	0.000184573	0.00503633
chr5:124088121-124089425	32.9563	1.23258	0.329637	3.73922	0.000184594	0.00503633
chr2:26173125-26175531	234.775	-0.791879	0.21181	-3.73863	0.000185028	0.00504342
chr7:151085263-151090711	609.613	-0.625619	0.167377	-3.73778	0.000185654	0.00505571
chr19:5335052-5341393	723.393	-0.590854	0.158157	-3.73588	0.000187062	0.00507969
chr19:18436513-18438605	132.054	-0.872485	0.23352	-3.73623	0.000186798	0.00507969
chr5:150655780-150657410	143.886	-0.850208	0.227567	-3.73608	0.000186912	0.00507969
chr14:77497861-77499634	197.533	-0.889202	0.238036	-3.73558	0.000187283	0.00508091
chr17:1625307-1630193	597.561	-0.656271	0.175704	-3.7351	0.000187641	0.00508253
chr19:12889994-12892433	308.836	-0.724599	0.194001	-3.73503	0.000187695	0.00508253
chr16:23301560-23302966	76.553	-1.02899	0.275563	-3.73415	0.000188348	0.00509544
chr1:67684286-67688189	645.157	-0.633241	0.169635	-3.73296	0.000189245	0.00510537
chr10:79066105-79074435	938.319	-0.533862	0.143005	-3.73317	0.000189087	0.00510537
chr8:140456040-140458912	395.517	-0.733596	0.196504	-3.73324	0.000189033	0.00510537
chr17:712840-718042	666.407	-0.568807	0.152406	-3.73219	0.000189821	0.00511138
chr9:134134280-134139310	634.819	-0.669726	0.179445	-3.73221	0.000189804	0.00511138
chr9:137876996-137879882	192.171	-0.755978	0.202627	-3.73089	0.000190803	0.00513303
chr20:833055-835174	322.067	-0.69029	0.185052	-3.73024	0.000191294	0.00513783
chr8:144426298-144429614	653.872	-0.602201	0.16144	-3.73019	0.000191337	0.00513783
chr19:35774543-35778593	431.198	-0.603406	0.161795	-3.72945	0.000191901	0.00514818
chr2:165198229-165204484	924.324	0.745361	0.199905	3.72858	0.000192565	0.0051612
chr10:124091204-124094162	238.771	-0.787785	0.211329	-3.72776	0.000193188	0.00516831
chr22:21000005-21004085	727.531	-0.585939	0.157179	-3.72786	0.000193116	0.00516831
chr16:30785665-30788117	400.522	-0.72788	0.195351	-3.72601	0.000194532	0.00516938
chr17:3634668-3637889	556.627	-0.723147	0.194089	-3.72585	0.000194659	0.00516938
chr20:38805240-38807704	315.11	-0.726371	0.194948	-3.72598	0.00019456	0.00516938
chr21:44010676-44014831	548.235	-0.532758	0.142966	-3.72646	0.000194189	0.00516938
chr22:50298425-50301351	97.4127	-0.89837	0.241042	-3.72703	0.000193751	0.00516938
chr5:66595463-66598563	456.279	-0.654747	0.175699	-3.72652	0.000194144	0.00516938
chr7:2402774-2405529	384.909	-0.651525	0.174864	-3.7259	0.000194618	0.00516938
chrX:20664574-20667119	75.2052	1.04926	0.281616	3.72587	0.000194645	0.00516938
chr1:29236003-29238967	178.984	-0.791323	0.212421	-3.72526	0.000195113	0.00517667
chr3:123066599-123069215	259.212	-0.780825	0.20962	-3.72495	0.000195355	0.00517833
chr16:75564922-75568149	597.319	-0.590027	0.158439	-3.724	0.000196093	0.00519313
chr10:22711296-22715157	506.308	-0.597855	0.160608	-3.72246	0.000197292	0.00521314
chr19:4342004-4345055	365.656	-0.66113	0.177593	-3.72273	0.000197084	0.00521314
chr5:49872026-49872561	28.1382	1.29201	0.347097	3.72233	0.000197389	0.00521314
chr16:279947-281919	136.857	-0.882919	0.237216	-3.72201	0.000197643	0.00521507
chr22:37050990-37053487	258.803	-0.731169	0.196465	-3.72162	0.000197948	0.00521835
chr19:47046949-47050185	360.53	-0.667059	0.179269	-3.721	0.000198438	0.00522651
chr1:123033838-123034594	57.8373	1.1619	0.312346	3.71991	0.000199292	0.00524421
chr13:59749747-59751696	125.083	0.897855	0.2414	3.71936	0.000199725	0.00525083
chr17:38671819-38675521	244.886	-0.740515	0.199149	-3.7184	0.000200488	0.00526609
chr9:137457565-137459941	210.371	-0.856521	0.230384	-3.71779	0.000200973	0.00527405
chr1:228108041-228110947	449.274	-0.652157	0.175436	-3.71735	0.000201321	0.00527837
chr16:89506876-89510693	641.165	-0.625367	0.168246	-3.71698	0.000201619	0.00528139
chr1:201466863-201470281	421.359	-0.713532	0.192008	-3.71616	0.000202275	0.00528899
chr17:22977381-22977739	88.4178	1.1552	0.310844	3.71635	0.000202123	0.00528899
chr10:100345007-100358511	1948.25	-0.453787	0.122123	-3.71582	0.000202546	0.00529115
chr11:11618962-11622597	488.809	-0.678696	0.182694	-3.71495	0.000203247	0.00529115
chr11:67400269-67402418	247.142	-0.804795	0.216642	-3.71486	0.00020332	0.00529115
chr11:70269572-70273486	513.787	-0.593358	0.159739	-3.71455	0.000203569	0.00529115
chr16:29806601-29818068	1484.55	-0.604682	0.162811	-3.714	0.000204006	0.00529115
chr17:1107563-1110281	205.999	-0.846186	0.227819	-3.71428	0.000203781	0.00529115
chr19:45767086-45770794	242.219	-0.831318	0.223822	-3.71419	0.000203855	0.00529115
chr20:40682752-40691288	816.029	-0.525882	0.141571	-3.71461	0.000203514	0.00529115
chr5:177495914-177498376	235.23	-0.811075	0.218346	-3.71463	0.000203502	0.00529115
chr7:151407902-151411133	397.948	-0.806431	0.217149	-3.71371	0.000204239	0.00529245
chr6:157379241-157384850	781.149	-0.606903	0.163493	-3.7121	0.000205547	0.00532156
chr10:41863684-41865991	86.6966	1.07028	0.28836	3.71163	0.000205933	0.00532678
chr1:143269571-143272077	61.6694	1.22136	0.329108	3.71113	0.000206335	0.0053324
chr11:43833049-43836214	121.471	0.951816	0.256524	3.71044	0.000206899	0.00533542
chr15:84979832-84983910	452.163	-0.636341	0.171507	-3.7103	0.000207013	0.00533542
chr16:36334668-36337309	76.0548	1.15749	0.311976	3.7102	0.000207098	0.00533542
chr8:1822700-1824628	198.072	-0.799098	0.215385	-3.71008	0.00020719	0.00533542
chr4:76433813-76438512	463.664	0.714897	0.192729	3.70933	0.000207806	0.0053465
chr1:124744359-124745816	37.9604	1.23908	0.33409	3.70883	0.000208222	0.00534703
chr2:117679275-117680521	30.5857	1.17484	0.31678	3.7087	0.00020833	0.00534703
chrX:153826630-153830639	326.887	-0.656464	0.17701	-3.70863	0.000208381	0.00534703
chr1:123650720-123651152	41.6626	1.23425	0.332914	3.70743	0.000209377	0.00535892
chr1:143244565-143246029	93.7694	1.14385	0.308531	3.7074	0.000209401	0.00535892
chr19:15199447-15201457	76.4299	-0.964565	0.260147	-3.70777	0.00020909	0.00535892
chr8:19938884-19941313	215.223	-0.787607	0.212471	-3.7069	0.000209814	0.00536473
chr16:89920766-89929207	1378.38	-0.536351	0.144711	-3.70636	0.00021026	0.00536664
chr7:151231258-151234231	451.766	-0.622763	0.168025	-3.70636	0.00021026	0.00536664
chr1:114150627-114155358	432.632	-0.711283	0.191982	-3.70495	0.000211436	0.00536896
chr16:1413410-1415437	168.168	-0.80436	0.21712	-3.70469	0.000211651	0.00536896
chr2:27132838-27135158	408.897	-0.637528	0.172028	-3.70595	0.000210596	0.00536896
chr2:74479374-74484273	640.567	-0.658917	0.177827	-3.70539	0.000211064	0.00536896
chr5:139795007-139798225	361.187	-0.720951	0.194578	-3.7052	0.000211224	0.00536896
chr7:66680652-66684730	628.205	-0.613055	0.165454	-3.70529	0.000211153	0.00536896
chr7:143836457-143837621	89.1756	-0.992962	0.268016	-3.70487	0.000211503	0.00536896
chr6:1310825-1314402	167.205	-0.784874	0.21193	-3.70346	0.000212678	0.0053826
chr8:85652952-85653938	24.0324	1.2689	0.342633	3.70338	0.000212748	0.0053826
chr9:100411154-100412405	122.394	0.778592	0.210228	3.70357	0.00021259	0.0053826
chr1:42418360-42418998	15.9916	1.30497	0.352416	3.70293	0.000213125	0.00538271
chr16:30947720-30950519	275.395	-0.793096	0.214176	-3.70301	0.000213056	0.00538271
chr4:127962654-127967427	876.694	-0.601924	0.162594	-3.702	0.000213907	0.00539773
chr3:195905937-195910336	317.853	-0.707657	0.191183	-3.70146	0.000214363	0.00540454
chr11:18789513-18793527	517.576	-0.646469	0.17469	-3.70066	0.000215043	0.00541695
chr16:89827256-89830573	296.636	-0.651997	0.176204	-3.70023	0.0002154	0.00542122
chr22:24951835-24954350	313.294	-0.717308	0.193888	-3.69961	0.00021593	0.00542983
chr13:17092765-17093320	11.8811	1.3215	0.357224	3.69935	0.000216152	0.00543068
chr15:75449412-75456669	1403.42	-0.507725	0.137295	-3.69807	0.000217247	0.00545343
chr1:33180166-33183090	331.909	-0.683647	0.184919	-3.697	0.000218161	0.00547163
chr6:30879819-30888584	1211.68	-0.540542	0.14623	-3.69651	0.00021858	0.00547738
chr1:32205010-32206914	200.588	-0.808431	0.218749	-3.6957	0.000219281	0.00548543
chr1:122607182-122607834	35.1138	1.18691	0.321145	3.69587	0.000219131	0.00548543
chr17:80474639-80478744	154.958	-0.866831	0.234576	-3.6953	0.000219625	0.00548928
chr1:180836034-180838233	76.6153	0.97659	0.264457	3.69281	0.000221793	0.00553392
chr6:12715589-12720293	501.435	0.711299	0.192609	3.69296	0.000221657	0.00553392
chr17:17680876-17684542	471.864	-0.640497	0.173548	-3.6906	0.000223723	0.00556305
chr2:170277194-170279464	55.2604	1.06054	0.287364	3.69059	0.000223731	0.00556305
chr5:93891932-93893463	33.8225	1.19811	0.324603	3.69101	0.000223369	0.00556305
chr6:30741093-30745062	468.974	-0.657452	0.178113	-3.6912	0.000223199	0.00556305
chr14:105488845-105492144	272.971	-0.745907	0.202172	-3.68948	0.000224716	0.00557316
chr17:63698483-63704040	350.88	-0.674281	0.18275	-3.68963	0.000224576	0.00557316
chr5:2738933-2740061	65.6301	-1.07112	0.290304	-3.68966	0.000224551	0.00557316
chr17:26101417-26101681	34.9706	1.22355	0.331677	3.68899	0.000225142	0.00557893
chr16:30525596-30528057	253.643	-0.753062	0.204212	-3.68764	0.000226341	0.00560102
chr2:50241279-50242277	24.298	1.24569	0.33781	3.68755	0.000226421	0.00560102
chr1:1347342-1349163	226.978	-0.764286	0.20732	-3.6865	0.000227358	0.00560277
chr11:3380491-3382888	74.983	0.992509	0.269191	3.687	0.000226914	0.00560277
chr12:49826135-49829804	524.544	-0.59741	0.162096	-3.68552	0.000228233	0.00560277
chr13:16776540-16776815	11.0434	1.31727	0.357342	3.68631	0.000227532	0.00560277
chr16:31441979-31443327	202.274	-0.826159	0.224071	-3.68705	0.000226871	0.00560277
chr21:44299170-44301521	249.877	-0.772556	0.209582	-3.68617	0.000227656	0.00560277
chr22:50581317-50584214	469.669	-0.641728	0.174074	-3.68652	0.000227342	0.00560277
chr3:39104895-39108813	620.96	-0.612203	0.16611	-3.68552	0.000228237	0.00560277
chrY:11289828-11290365	17.7018	1.31034	0.355532	3.68557	0.000228191	0.00560277
chr11:7251322-7254295	431.169	-0.707148	0.191886	-3.68525	0.000228482	0.00560402
chr8:85462867-85465458	249.96	-0.691835	0.187775	-3.68438	0.000229259	0.00561832
chr7:151874803-151879329	512.946	-0.605919	0.164486	-3.68372	0.000229857	0.00562819
chr19:8608400-8610999	369.806	-0.703122	0.190897	-3.68325	0.000230284	0.00563385
chr11:43941233-43945391	637.687	-0.571895	0.155326	-3.68189	0.000231507	0.00564488
chr11:67629382-67631556	185.789	-0.859841	0.233538	-3.68181	0.000231586	0.00564488
chr15:31215212-31216988	80.9376	-0.963022	0.261572	-3.68167	0.000231711	0.00564488
chr19:4277931-4281283	298.289	-0.682997	0.185501	-3.68191	0.000231491	0.00564488
chr19:33175447-33179043	551.427	-0.57759	0.156881	-3.6817	0.000231685	0.00564488
chr8:11464576-11467688	282.035	-0.750499	0.203876	-3.68116	0.000232174	0.0056514
chr19:571087-576840	793.823	-0.552552	0.150189	-3.67904	0.000234116	0.00568908
chr9:128125857-128129314	566.218	-0.625461	0.169998	-3.67922	0.00023395	0.00568908
chr4:5707869-5708936	48.1149	-1.06462	0.289428	-3.67835	0.000234746	0.00569481
chr9:127784699-127787715	430.564	-0.618377	0.168104	-3.67855	0.000234566	0.00569481
chr17:45783255-45786187	355.072	-0.751443	0.204315	-3.67785	0.000235204	0.00570112
chr1:225881805-225883252	83.0721	-0.999907	0.27198	-3.67639	0.000236556	0.00570177
chr13:16136835-16137775	48.8713	1.21836	0.331363	3.67683	0.000236154	0.00570177
chr14:100213607-100215034	100.633	-0.901691	0.24529	-3.67602	0.0002369	0.00570177
chr15:20373554-20376433	61.7384	1.20012	0.326483	3.67591	0.000237006	0.00570177
chr16:89559480-89562815	588.376	-0.597959	0.162663	-3.67606	0.000236862	0.00570177
chr19:2060022-2062715	274.163	-0.722657	0.196535	-3.67699	0.000236005	0.00570177
chr21:34886625-34890568	216.81	-0.701653	0.190851	-3.67645	0.000236498	0.00570177
chr22:38869831-38874018	617.893	-0.574624	0.15631	-3.67619	0.000236745	0.00570177
chr7:1457675-1460416	212.324	-0.857383	0.233184	-3.67685	0.000236133	0.00570177
chr19:1025886-1028562	137.236	-0.900417	0.24498	-3.67547	0.000237413	0.0057068
chr12:131709893-131713643	913.169	-0.526134	0.143175	-3.67476	0.000238069	0.00570832
chr8:23681809-23683858	191.605	-0.825786	0.224715	-3.67482	0.000238018	0.00570832
chrY:11297190-11298213	73.2946	1.09246	0.297266	3.67501	0.000237843	0.00570832
chr19:27393852-27395750	38.6631	1.27746	0.347694	3.67409	0.000238698	0.00571391
chr5:80568915-80570904	178.448	-0.85275	0.232093	-3.67417	0.00023862	0.00571391
chr17:23582809-23583976	45.0907	1.26249	0.34367	3.67355	0.0002392	0.00571647
chr7:1568291-1571758	448.994	-0.733284	0.199602	-3.67373	0.000239032	0.00571647
chr16:1350335-1353488	534.977	-0.607723	0.165461	-3.67291	0.000239801	0.0057261
chr12:6827100-6830865	479.804	-0.666269	0.181479	-3.67134	0.000241284	0.00572836
chr12:113357668-113360477	416.425	-0.606627	0.165201	-3.67206	0.000240608	0.00572836
chr14:59463707-59465963	209.105	-0.800971	0.21816	-3.67148	0.000241151	0.00572836
chr15:75200645-75204063	326.131	-0.695962	0.189549	-3.67167	0.000240975	0.00572836
chr19:24891486-24892271	55.7706	1.15465	0.314432	3.67217	0.000240496	0.00572836
chr19:58543150-58547337	677.747	-0.554633	0.151059	-3.67163	0.000241005	0.00572836
chr8:22244004-22246822	494.089	-0.592806	0.161446	-3.67186	0.000240796	0.00572836
chr1:123519176-123519685	36.7273	1.23407	0.336301	3.66953	0.000242997	0.00574788
chr1:124705291-124706869	81.8974	1.07535	0.293008	3.67003	0.000242526	0.00574788
chr15:62163734-62165641	132.848	-0.892972	0.243374	-3.66914	0.000243372	0.00574788
chr16:380373-384229	372.464	-0.628715	0.171366	-3.66884	0.000243651	0.00574788
chr16:726420-728878	162.525	-0.863844	0.235427	-3.66926	0.000243256	0.00574788
chr2:128232414-128233985	160.762	-0.79905	0.217783	-3.66902	0.00024348	0.00574788
chr5:140174131-140176910	479.412	-0.693363	0.188942	-3.66972	0.000242814	0.00574788
chrX:1451557-1453762	235.329	-0.785906	0.214214	-3.66879	0.000243698	0.00574788
chr1:124740151-124740763	32.8588	1.29501	0.353	3.66858	0.000243897	0.00574789
chr11:65779667-65782154	181.158	-0.765627	0.208725	-3.66811	0.000244346	0.00574909
chr2:238237925-238241615	262.609	-0.738093	0.201215	-3.66818	0.000244284	0.00574909
chr1:1510935-1513783	376.73	-0.622491	0.169757	-3.66695	0.000245459	0.00576589
chr21:10471695-10472104	12.7522	1.30943	0.35707	3.66716	0.000245264	0.00576589
chr16:70113188-70116175	494.822	-0.615238	0.16783	-3.66584	0.000246529	0.00577898
chr19:7871669-7875308	312.712	-0.741559	0.202287	-3.66588	0.000246491	0.00577898
chr9:131502065-131505204	500.795	-0.650939	0.177573	-3.66575	0.000246616	0.00577898
chr1:124495212-124496053	34.9531	1.24471	0.339614	3.66506	0.000247278	0.00578215
chr13:113205390-113211776	972.183	-0.474205	0.129388	-3.66499	0.000247352	0.00578215
chr17:7393189-7395563	381.115	-0.662086	0.180642	-3.66519	0.000247157	0.00578215
chr16:4536542-4539455	377.84	-0.670478	0.182965	-3.66452	0.000247802	0.005788
chr19:42323899-42328500	484.607	-0.641593	0.175197	-3.66212	0.000250136	0.00583778
chr1:122842618-122842885	51.0753	1.21788	0.33262	3.66148	0.000250759	0.00584044
chr15:73364410-73369816	573.61	-0.610957	0.166862	-3.66145	0.000250796	0.00584044
chr19:50724011-50726668	333.521	-0.682564	0.186422	-3.66138	0.000250856	0.00584044
chr19:2094168-2097487	443.633	-0.625767	0.170934	-3.66087	0.000251359	0.00584743
chr2:25040899-25044877	562.455	-0.619228	0.169166	-3.66049	0.000251737	0.00585152
chr2:232875283-232877711	182.176	-0.744015	0.203314	-3.65943	0.000252776	0.00587095
chr1:201888291-201890222	124.507	-0.882222	0.241161	-3.65823	0.000253963	0.00589377
chr5:173325324-173330642	289.704	-0.664326	0.18161	-3.65797	0.000254217	0.00589494
chr4:75939577-75941676	241.68	-0.712062	0.194726	-3.65674	0.000255446	0.00591867
chr10:100996942-101002223	398.488	-0.68285	0.186838	-3.65476	0.000257418	0.00595007
chr12:107317837-107322101	405.868	-0.618366	0.169187	-3.65494	0.000257246	0.00595007
chr14:21369172-21370343	28.073	1.20619	0.330007	3.65505	0.000257135	0.00595007
chr10:29730212-29732397	252.256	0.736741	0.201628	3.65397	0.000258218	0.00596378
chr6:31355529-31357722	146.311	-0.83944	0.2298	-3.65291	0.000259283	0.00597406
chr6:119346824-119351205	508.717	-0.65711	0.179884	-3.65297	0.000259221	0.00597406
chr9:79662179-79664928	102.507	0.894936	0.244989	3.65296	0.00025923	0.00597406
chr6:138403138-138406031	324.579	-0.620895	0.169991	-3.65253	0.00025967	0.00597821
chr10:70477838-70479711	175.442	-0.738014	0.202079	-3.6521	0.0002601	0.00597858
chr4:183097750-183100958	334.561	-0.723753	0.198169	-3.65219	0.000260013	0.00597858
chr11:119723700-119730356	827.558	-0.561913	0.153898	-3.65119	0.000261023	0.00599502
chr5:136191800-136193563	143.762	-0.951235	0.260542	-3.65098	0.000261241	0.00599527
chr17:81889748-81893222	468.68	-0.569868	0.156201	-3.6483	0.000263982	0.00605336
chr1:124344392-124345770	50.7278	1.18971	0.326135	3.6479	0.000264391	0.00605794
chr12:122020913-122024819	551.998	-0.603091	0.165351	-3.64733	0.000264976	0.00606652
chr11:554703-557381	87.1155	-0.993884	0.272516	-3.64707	0.000265247	0.00606791
chr1:31412115-31415825	447.989	-0.663812	0.182031	-3.6467	0.00026563	0.00607188
chr2:158967538-158970984	452.403	-0.616812	0.169198	-3.6455	0.000266869	0.00609055
chr20:19756768-19760012	420.793	-0.683834	0.187579	-3.64558	0.000266786	0.00609055
chr4:49136471-49137584	68.5275	1.07592	0.295209	3.64462	0.000267788	0.0061067
chr1:122861193-122862104	125.156	1.02666	0.281778	3.64352	0.000268934	0.00612317
chr6:28655432-28660734	1252.21	0.615548	0.16894	3.6436	0.000268854	0.00612317
chr16:4935861-4937673	100.521	-0.895855	0.245909	-3.64304	0.000269438	0.00612538
chr2:240453658-240457279	388.686	-0.707209	0.194127	-3.64302	0.000269455	0.00612538
chr1:124761776-124762115	50.3952	1.2021	0.329997	3.64275	0.000269745	0.00612714
chr19:1274537-1277081	188.135	-0.7993	0.219488	-3.64166	0.000270887	0.00614389
chr6:34142178-34146241	306.464	-0.788338	0.216479	-3.64164	0.000270907	0.00614389
chr1:124352506-124353815	40.2489	1.14123	0.313424	3.64115	0.000271418	0.0061443
chr10:21926539-21929644	128.16	0.828983	0.227679	3.64102	0.000271563	0.0061443
chr5:10563225-10565903	226.47	-0.766052	0.210387	-3.64115	0.000271418	0.0061443
chr9:133374185-133377451	581.58	-0.571292	0.156949	-3.63999	0.00027265	0.00616407
chr1:178370558-178376850	1033.9	0.708459	0.194723	3.63829	0.000274452	0.00619511
chr19:45882573-45887584	443.268	-0.592056	0.162725	-3.63837	0.000274365	0.00619511
chr5:47296468-47297211	20.6556	1.2925	0.355277	3.63801	0.000274748	0.00619696
chr17:2709600-2713002	319.362	-0.664191	0.182589	-3.63763	0.00027516	0.0062014
chr1:155253153-155256387	312.002	-0.779909	0.214469	-3.63647	0.000276397	0.00622442
chr12:132826804-132829898	443.475	-0.615889	0.169395	-3.63582	0.000277103	0.00623122
chr19:58556711-58560461	483.957	-0.625854	0.172137	-3.63579	0.00027713	0.00623122
chr14:59965294-59965822	13.1012	1.26808	0.3488	3.63556	0.00027738	0.00623198
chr1:123435541-123436182	27.0995	1.25665	0.345716	3.63491	0.000278072	0.00624269
chr10:13298908-13300642	184.125	-0.761852	0.209645	-3.63402	0.000279041	0.00625958
chr1:23798948-23802022	441.129	-0.681153	0.187477	-3.63327	0.000279852	0.00627277
chr11:61826283-61835649	1424.55	-0.45818	0.126126	-3.63271	0.000280456	0.00627277
chr12:53053388-53055032	162.543	-0.771063	0.212258	-3.63268	0.000280498	0.00627277
chr8:38464446-38469195	778.576	-0.559578	0.154039	-3.6327	0.000280473	0.00627277
chr14:105092687-105094871	136.871	-0.840335	0.231458	-3.63062	0.000282742	0.00630345
chr2:130353932-130357047	279.404	-0.706703	0.194635	-3.63092	0.00028241	0.00630345
chr3:133893175-133896853	541.293	-0.632178	0.174123	-3.63064	0.000282717	0.00630345
chr7:73737624-73739872	352.25	-0.735856	0.202671	-3.63079	0.000282554	0.00630345
chr17:83050674-83052568	164.904	-0.859787	0.236831	-3.63038	0.000283008	0.00630451
chr21:10435865-10437617	49.5866	1.18296	0.325932	3.62946	0.000284017	0.00631354
chr22:45975497-45979462	180.354	-0.813824	0.22421	-3.62974	0.000283709	0.00631354
chr6:150004409-150006057	160.12	-0.828369	0.22825	-3.62921	0.000284287	0.00631354
chr7:6728865-6732157	459.898	-0.621719	0.171305	-3.62932	0.00028417	0.00631354
chr11:65013193-65015602	366.303	-0.716758	0.197515	-3.62887	0.000284664	0.00631509
chr7:74288575-74292352	494.386	-0.696768	0.192013	-3.62875	0.000284794	0.00631509
chr16:46883219-46887252	512.939	-0.617792	0.170278	-3.62814	0.000285473	0.00632529
chr11:573732-578681	650.803	-0.581549	0.16031	-3.62766	0.000286001	0.00632727
chr5:175657431-175659502	159.752	-0.772073	0.212821	-3.6278	0.000285845	0.00632727
chr8:85742858-85743254	27.9073	1.26723	0.349348	3.62743	0.00028626	0.00632817
chr11:64720063-64724254	452.827	-0.57323	0.158036	-3.62722	0.000286486	0.00632832
chr11:44095137-44098059	456.299	-0.573545	0.158155	-3.62648	0.000287314	0.00633665
chr17:63997865-63999674	149.528	-0.832016	0.229416	-3.62667	0.000287103	0.00633665
chr2:219541313-219547016	863.716	-0.54513	0.150341	-3.62596	0.000287895	0.00633665
chr22:50627204-50629323	287.829	-0.727624	0.200666	-3.62605	0.000287785	0.00633665
chrX:154457281-154460945	246.791	-0.703794	0.194102	-3.6259	0.00028796	0.00633665
chr11:61814080-61818446	743.198	-0.594585	0.164008	-3.62533	0.000288591	0.00634572
chr12:117098475-117099939	141.645	-0.850642	0.234659	-3.62502	0.000288944	0.00634863
chrX:110001976-110005824	322.63	-0.662947	0.182897	-3.62471	0.000289288	0.00635136
chr2:231924966-231927697	307.311	-0.790755	0.218178	-3.62436	0.000289679	0.00635513
chr1:124373413-124374302	34.2572	1.22554	0.338181	3.62394	0.000290154	0.00636071
chr13:100510150-100511052	24.5429	1.21969	0.336696	3.62253	0.000291735	0.00639052
chr15:20662498-20663558	23.424	1.28334	0.354324	3.62194	0.000292398	0.00640019
chr1:960134-961661	115.041	-0.887367	0.245012	-3.62173	0.000292636	0.00640056
chr13:114129898-114133086	365.315	-0.720489	0.19896	-3.62128	0.000293153	0.00640216
chr7:75483365-75486969	527.947	-0.592175	0.163518	-3.62147	0.000292932	0.00640216
chr17:80413338-80417166	692.567	-0.635842	0.175616	-3.62064	0.000293879	0.00641317
chr2:172070909-172076755	145.012	0.88585	0.244703	3.62011	0.000294481	0.00642146
chr10:41133796-41134115	71.5816	1.05859	0.292638	3.6174	0.000297573	0.00647093
chr11:96306260-96308703	109.98	0.819139	0.226413	3.6179	0.000297007	0.00647093
chr3:42653469-42655800	200.353	-0.756599	0.209159	-3.61734	0.000297645	0.00647093
chr5:17526194-17527272	44.8318	1.14278	0.31591	3.61741	0.000297562	0.00647093
chr19:1286087-1288975	285.825	-0.769745	0.212852	-3.61633	0.000298804	0.00649124
chr14:54901332-54903846	369.388	-0.721796	0.199641	-3.61546	0.00029981	0.00649508
chr16:66879795-66882174	331.289	-0.74068	0.20485	-3.61572	0.000299517	0.00649508
chr19:15448570-15450576	175.294	-0.719566	0.199028	-3.6154	0.00029988	0.00649508
chr20:3845550-3848692	479.12	-0.687209	0.190077	-3.61543	0.000299847	0.00649508
chr19:7292082-7295308	461.756	-0.635167	0.175699	-3.61509	0.000300243	0.00649732
chr2:127104705-127108599	626.06	-0.5959	0.164844	-3.61493	0.000300433	0.00649732
chr11:803959-806055	136.69	-0.83516	0.231066	-3.61438	0.000301067	0.00650128
chr14:104135668-104141475	725.3	-0.71377	0.197478	-3.61443	0.000301015	0.00650128
chr16:66603371-66606174	255.965	-0.758425	0.209867	-3.61384	0.000301689	0.00650987
chr1:123013380-123013744	35.789	1.23588	0.34201	3.61357	0.000302007	0.00651185
chr16:11668603-11671491	394.173	-0.67111	0.185731	-3.61334	0.000302283	0.00651295
chr11:76205467-76211289	481.277	-0.679013	0.187945	-3.61282	0.000302885	0.00651773
chr5:24639375-24645929	1055.77	0.663241	0.183583	3.61276	0.000302956	0.00651773
chr16:89655997-89659661	614.533	-0.600789	0.166308	-3.61251	0.000303246	0.00651911
chr1:124164210-124164635	37.2747	1.18713	0.328728	3.61127	0.000304701	0.00654552
chr1:123225392-123226104	55.9971	1.20526	0.333779	3.61095	0.000305077	0.00654873
chr15:70761939-70764527	368.358	-0.661475	0.183241	-3.60986	0.000306368	0.00656307
chr19:55404984-55409110	413.057	-0.656233	0.181792	-3.60981	0.000306426	0.00656307
chr9:130937919-130940432	180.058	-0.768739	0.21294	-3.61012	0.000306061	0.00656307
chr7:128790159-128793354	370.888	-0.675712	0.187227	-3.60904	0.000307328	0.0065775
chr16:88452507-88457115	312.919	-0.677956	0.187876	-3.60854	0.000307929	0.00658481
chr22:31084262-31085722	101.74	-0.906596	0.251248	-3.60837	0.000308125	0.00658481
chr19:41350758-41354636	217.462	-0.765463	0.212221	-3.60691	0.000309864	0.00661708
chr10:118403607-118405225	42.7477	1.09768	0.304361	3.6065	0.000310351	0.00662257
chr2:70300612-70302565	308.297	-0.679587	0.188473	-3.60576	0.000311236	0.00663167
chr3:76310484-76312966	55.5652	1.00604	0.279004	3.60584	0.000311143	0.00663167
chr17:24748154-24748405	26.5767	1.28558	0.356578	3.60534	0.00031175	0.00663773
chr8:85651013-85652411	46.0695	1.19685	0.331992	3.60506	0.000312086	0.00663999
chr19:3625152-3627641	414.533	-0.604825	0.16778	-3.60486	0.00031232	0.00664006
chr2:237690911-237693786	236.159	-0.755652	0.20968	-3.60383	0.000313559	0.00665662
chr20:26207408-26210192	140.738	-0.778611	0.216048	-3.60387	0.00031351	0.00665662
chr16:51942-55036	499.433	-0.580985	0.161283	-3.60227	0.000315446	0.00669116
chr5:86482072-86482562	12.5394	1.28756	0.357447	3.60211	0.000315649	0.00669116
chr17:80219322-80221613	237.027	-0.761646	0.211471	-3.60167	0.000316185	0.0066976
chr19:1489514-1491815	215.278	-0.784933	0.217952	-3.60141	0.000316497	0.0066993
chr17:24770716-24770999	38.4574	1.23842	0.343895	3.60115	0.00031681	0.0067007
chr21:7968104-7968852	20.2543	1.24914	0.346889	3.60097	0.000317027	0.0067007
chr3:169811229-169813331	134.485	-0.773478	0.214828	-3.60046	0.000317658	0.00670853
chr9:93183284-93188235	456.357	-0.648995	0.180262	-3.60029	0.000317862	0.00670853
chr1:1397058-1401164	709.421	-0.577993	0.160598	-3.599	0.000319439	0.00672217
chr17:79023808-79025134	104.754	-0.896164	0.248993	-3.59915	0.00031926	0.00672217
chr5:177309932-177313366	283.82	-0.726268	0.201777	-3.59936	0.000319005	0.00672217
chr8:59106135-59110875	220.275	0.792717	0.220251	3.59915	0.000319258	0.00672217
chr17:76382407-76385904	221.815	-0.778754	0.216419	-3.59836	0.000320228	0.00672898
chr8:37796304-37799230	139.941	-0.750978	0.20869	-3.59853	0.000320022	0.00672898
chr16:1983068-1985666	346.823	-0.732539	0.203598	-3.59796	0.000320717	0.00673435
chr2:196987229-196989461	64.7038	1.02036	0.283617	3.59765	0.000321102	0.00673755
chr16:57535334-57537536	173.36	-0.833459	0.231725	-3.59676	0.000322211	0.00675591
chr17:8150493-8157600	589.666	-0.570308	0.158583	-3.59628	0.000322796	0.00676326
chr11:119091398-119096178	635.246	-0.58825	0.163626	-3.59508	0.000324291	0.00677005
chr12:119876150-119877990	244.91	-0.701071	0.194977	-3.59565	0.000323577	0.00677005
chr13:16142994-16144987	60.3027	1.17237	0.326089	3.59524	0.000324088	0.00677005
chr22:45309169-45311672	329.778	-0.697283	0.193942	-3.59531	0.000324007	0.00677005
chr8:125428475-125435571	1066.67	-0.541577	0.150643	-3.5951	0.000324263	0.00677005
chr17:39925489-39928840	301.523	-0.723073	0.201144	-3.5948	0.000324638	0.00677239
chr20:2206793-2208367	102.21	-0.863656	0.24028	-3.59437	0.000325172	0.00677864
chr12:3076183-3078634	205.655	-0.696536	0.1938	-3.59409	0.000325521	0.00678037
chr9:127753390-127756521	372.143	-0.646924	0.180004	-3.59393	0.000325724	0.00678037
chr5:128535980-128539590	402.49	-0.662773	0.184425	-3.59373	0.000325979	0.00678079
chr1:37806520-37809947	619.548	-0.538887	0.149962	-3.59349	0.000326281	0.00678219
chr1:36088312-36090947	404.173	-0.639081	0.177865	-3.59306	0.000326817	0.00678844
chr17:45893490-45899458	926.239	-0.541293	0.150677	-3.59241	0.00032764	0.00680064
chr1:124132728-124132995	56.9866	1.15459	0.321449	3.59184	0.000328347	0.00681042
chr11:69048321-69050296	328.809	-0.674579	0.187827	-3.59148	0.000328804	0.00681501
chr11:46380682-46383568	156.642	-0.8039	0.223909	-3.5903	0.000330301	0.00684114
chr1:123623706-123624333	20.3667	1.25975	0.350936	3.58969	0.000331074	0.00685
chr11:67352574-67354202	202.179	-0.774239	0.215691	-3.58957	0.000331219	0.00685
chr20:1183670-1186319	201.008	-0.702337	0.19567	-3.5894	0.00033144	0.00685
chr12:120900738-120905223	612.294	-0.526965	0.146821	-3.58916	0.000331745	0.00685139
chr9:124592830-124594279	48.9315	1.09851	0.306081	3.58896	0.000331996	0.00685168
chr1:16913088-16915286	168.466	-0.751934	0.209563	-3.5881	0.000333091	0.00685701
chr12:12516625-12522450	592.967	0.750423	0.209147	3.58802	0.000333203	0.00685701
chr5:51660081-51665803	501.632	0.741483	0.206648	3.58814	0.000333042	0.00685701
chrX:153792505-153796630	436.08	-0.602886	0.16801	-3.5884	0.000332707	0.00685701
chr13:16021008-16022477	47.24	1.17322	0.32704	3.58738	0.000334018	0.00686793
chr5:176606537-176611226	404.267	-0.604212	0.168434	-3.58723	0.000334209	0.00686793
chr17:74747863-74750435	135.718	-0.910564	0.253888	-3.58647	0.000335182	0.00688263
chr3:63911162-63914510	365.744	-0.643298	0.179377	-3.5863	0.000335401	0.00688263
chr1:122756058-122756698	35.0453	1.20665	0.336558	3.58525	0.000336751	0.00690053
chr9:131276279-131278542	137.887	-0.760255	0.212045	-3.58534	0.000336638	0.00690053
chr2:123303612-123304385	24.2098	1.23494	0.344556	3.58414	0.000338194	0.00692027
chr8:6833960-6836536	317.473	-0.766189	0.213765	-3.58426	0.000338035	0.00692027
chr4:142844273-142847528	422.357	-0.647202	0.180596	-3.5837	0.000338762	0.00692699
chr10:74823687-74829257	527.655	-0.618171	0.172559	-3.58237	0.000340491	0.00695743
chr11:45660181-45666196	476.168	-0.694268	0.193876	-3.58099	0.000342291	0.00696466
chr11:46026406-46027777	36.462	1.16658	0.325765	3.58105	0.000342211	0.00696466
chr12:53045738-53048567	228.654	-0.701279	0.19583	-3.58105	0.000342213	0.00696466
chr12:100572989-100575887	520.24	-0.509251	0.142202	-3.58119	0.000342038	0.00696466
chr19:1265923-1268342	104.112	-0.877136	0.244935	-3.58109	0.000342162	0.00696466
chr8:143989453-143991690	215	-0.714255	0.199438	-3.58134	0.00034184	0.00696466
chr6:7106908-7110321	331.901	-0.668944	0.186824	-3.58062	0.000342782	0.00696973
chr17:78167811-78170103	160.278	-0.872717	0.243792	-3.57976	0.000343904	0.00698764
chr3:57163020-57166038	411.651	-0.702602	0.19629	-3.57941	0.000344365	0.00699208
chr13:16235896-16236938	32.5865	1.24622	0.348298	3.57801	0.000346214	0.00702469
chr19:10118636-10120221	273.069	-0.76487	0.213792	-3.57764	0.00034671	0.00702881
chr7:99391957-99394118	203.945	-0.731861	0.204574	-3.57749	0.000346903	0.00702881
chr7:65251188-65252902	175.965	-0.781183	0.218423	-3.57647	0.000348268	0.00704838
chr7:159143458-159145929	193.089	-0.697701	0.195085	-3.5764	0.000348357	0.00704838
chr3:50291103-50293242	314.007	-0.678877	0.189839	-3.57606	0.000348813	0.00705267
chr19:1846585-1849206	408.999	-0.628485	0.175764	-3.57572	0.000349263	0.00705682
chr22:46069090-46075664	884.863	-0.524487	0.14671	-3.57499	0.000350247	0.00707175
chr1:123524308-123524857	35.1258	1.195	0.334322	3.57441	0.000351016	0.00707798
chr2:77511917-77523148	1488.4	0.67353	0.188432	3.57439	0.000351045	0.00707798
chr16:4764921-4767884	361.841	-0.654745	0.18319	-3.57412	0.000351404	0.00707984
chr8:144525848-144529746	348.76	-0.676629	0.189322	-3.57396	0.000351627	0.00707984
chr3:38453171-38457613	649.728	-0.609907	0.170668	-3.57363	0.00035206	0.00708361
chr3:46692758-46694064	65.3109	-1.00873	0.282285	-3.57344	0.000352328	0.00708408
chr2:131490273-131495715	882.436	-0.543946	0.152232	-3.57313	0.000352734	0.0070873
chr3:48634177-48636433	249.839	-0.742764	0.207897	-3.57275	0.000353249	0.00709273
chr13:16638423-16638701	18.8409	1.27011	0.355548	3.57227	0.000353897	0.0071008
chr19:12665611-12671077	974.424	-0.523189	0.146477	-3.57182	0.000354514	0.00710823
chr7:72878641-72882258	588.145	-0.542672	0.151978	-3.57073	0.000355985	0.00713278
chr1:123106946-123107739	34.9682	1.1928	0.334134	3.56984	0.000357201	0.00715218
chr1:123951971-123952628	22.1485	1.21602	0.340747	3.56868	0.000358789	0.007179
chr13:27270044-27271851	287.156	-0.740699	0.207579	-3.56827	0.000359352	0.00718034
chr18:15409213-15410238	28.9765	1.22337	0.342841	3.56833	0.00035927	0.00718034
chr5:132489447-132491488	272.851	-0.759019	0.21273	-3.56799	0.000359727	0.00718286
chr12:121535238-121538811	297.788	-0.681986	0.191173	-3.56738	0.000360564	0.00719392
chr13:16230246-16231048	63.1488	1.17004	0.328014	3.56705	0.000361028	0.00719392
chr16:2204642-2207435	312.189	-0.668978	0.187535	-3.56722	0.000360791	0.00719392
chr11:30009365-30011249	57.3581	1.08072	0.303036	3.56632	0.000362031	0.00720893
chr1:29124067-29125303	58.8937	-0.99654	0.279457	-3.56599	0.000362484	0.00721299
chr3:49722463-49724895	396.798	-0.647327	0.181573	-3.56511	0.000363702	0.00723223
chr14:60720960-60725205	495.245	-0.613055	0.17201	-3.56406	0.000365157	0.00725618
chr3:181496811-181497905	34.2169	1.1344	0.318332	3.56359	0.000365822	0.0072644
chr12:132188832-132190704	168.072	-0.729862	0.204864	-3.56267	0.000367107	0.0072849
chr19:506090-509161	424.191	-0.66991	0.188065	-3.56213	0.000367858	0.00729481
chr16:2775043-2779138	811.618	-0.557541	0.156529	-3.5619	0.000368184	0.00729626
chr10:41845566-41846078	23.2339	1.24299	0.349066	3.5609	0.000369586	0.00731901
chr1:227733639-227737391	566.654	-0.634721	0.178312	-3.55961	0.000371408	0.00734
chr21:10765065-10767546	52.9127	1.20244	0.337771	3.55992	0.000370969	0.00734
chr22:39518718-39525155	1197.22	-0.505138	0.141902	-3.55977	0.000371178	0.00734
chr17:44141395-44143131	210.646	-0.763344	0.21447	-3.5592	0.000371979	0.00734628
chr1:123230776-123231047	20.5598	1.2699	0.356984	3.55731	0.000374669	0.00738601
chr17:7435215-7442870	566.593	-0.573625	0.161255	-3.55725	0.000374758	0.00738601
chr9:137068886-137071219	130.533	-0.883229	0.24827	-3.55753	0.000374362	0.00738601
chr10:44381267-44387106	291.536	-0.691762	0.194514	-3.55636	0.00037603	0.00740602
chr7:2240697-2243537	533.413	-0.599706	0.168656	-3.55579	0.00037684	0.00741693
chr1:43978010-43981285	294.487	-0.691467	0.194473	-3.55558	0.000377139	0.00741775
chr11:67506576-67509585	376.866	-0.674553	0.189751	-3.55493	0.000378073	0.00742601
chrX:68827823-68836528	869.266	-0.568241	0.159839	-3.55508	0.000377862	0.00742601
chr20:31513938-31516463	457.355	-0.580508	0.163322	-3.55439	0.000378861	0.00743644
chr17:7833511-7845685	1673.72	-0.497047	0.139847	-3.55421	0.00037912	0.00743646
chr19:4066199-4068480	167.756	-0.762166	0.214455	-3.55397	0.000379469	0.00743826
chr3:134794619-134800758	907.768	-0.611926	0.172194	-3.55371	0.000379836	0.00744042
chr14:106350939-106351690	21.6495	1.23918	0.348744	3.55327	0.000380469	0.00744776
chr10:60567411-60574592	1567.94	0.633982	0.178445	3.55282	0.000381123	0.00745046
chr19:14071752-14075704	435.369	-0.661722	0.18625	-3.55287	0.000381056	0.00745046
chr22:39144428-39146592	261.438	-0.776284	0.218554	-3.55192	0.000382435	0.00747107
chr13:76882601-76887516	415.336	-0.639473	0.180075	-3.55115	0.000383554	0.00748785
chr20:32761681-32764143	219.517	-0.710992	0.200245	-3.55061	0.000384338	0.00748799
chr6:70952024-70958160	659.812	-0.580578	0.163509	-3.55075	0.000384141	0.00748799
chr9:97038193-97039963	191.128	-0.779132	0.219417	-3.55091	0.000383901	0.00748799
chr17:80259679-80262228	212.212	-0.70536	0.198709	-3.54972	0.000385647	0.00750492
chr2:182558369-182559289	21.3989	1.24331	0.350268	3.5496	0.000385821	0.00750492
chr20:345901-349068	502.815	-0.591555	0.166659	-3.54948	0.000385987	0.00750492
chr17:70104183-70105995	33.1734	1.13962	0.321139	3.5487	0.000387141	0.0075223
chr6:166997748-167002675	810.817	-0.529468	0.149213	-3.54841	0.000387571	0.00752559
chr1:225922527-225925202	371.143	-0.669795	0.188778	-3.54805	0.000388091	0.00753063
chr10:42087431-42088169	29.3351	1.24016	0.349563	3.54776	0.000388527	0.00753404
chr1:124406353-124406823	46.1724	1.19848	0.33796	3.54622	0.000390806	0.00753776
chr1:228377705-228379534	152.045	-0.850697	0.239809	-3.54739	0.000389066	0.00753776
chr14:103628047-103632022	749.414	-0.471037	0.13279	-3.54722	0.000389321	0.00753776
chr17:2747962-2750906	325.445	-0.598749	0.168828	-3.5465	0.000390387	0.00753776
chr2:96536362-96539012	234.355	-0.749887	0.211429	-3.54675	0.000390018	0.00753776
chr5:154444400-154449118	835.104	-0.556218	0.156845	-3.54629	0.000390703	0.00753776
chr8:101787319-101792231	238.689	0.743345	0.209568	3.54704	0.000389586	0.00753776
chr9:137551067-137552967	250.963	-0.744448	0.209915	-3.54643	0.000390495	0.00753776
chr1:123640262-123640780	30.3828	1.19207	0.336183	3.54589	0.000391288	0.00754202
chr15:20404486-20406357	43.5348	1.21487	0.342686	3.54513	0.000392414	0.00755364
chr16:82626536-82628380	187.468	-0.718983	0.202799	-3.5453	0.000392166	0.00755364
chr1:122871687-122872324	28.2448	1.20878	0.341171	3.54304	0.000395549	0.00760893
chr20:56002698-56005885	141.984	-0.798498	0.225399	-3.5426	0.0003962	0.00761636
chr1:159170901-159175232	601.557	-0.577707	0.163094	-3.54218	0.000396834	0.00762348
chr20:29089308-29090649	33.7424	1.19292	0.336819	3.54174	0.0003975	0.00762615
chr3:58007869-58011085	546.218	-0.612668	0.172979	-3.54187	0.000397306	0.00762615
chr4:128060324-128063537	476.008	-0.579026	0.163522	-3.54097	0.000398662	0.00764048
chrX:136250227-136252057	134.304	-0.778292	0.219801	-3.54089	0.000398776	0.00764048
chr10:71318781-71320988	193.948	-0.703832	0.198806	-3.5403	0.000399677	0.00765267
chr6:142882386-142886248	435.606	0.681075	0.192394	3.54	0.000400129	0.00765625
chr13:16139447-16140930	34.7322	1.20024	0.339086	3.53962	0.000400701	0.00766211
chr1:155320072-155326049	880.409	-0.604303	0.170737	-3.53937	0.000401079	0.00766427
chr10:686346-689720	495.806	-0.541279	0.152947	-3.539	0.000401647	0.00767005
chr17:81858528-81863136	539.805	-0.592214	0.167353	-3.53872	0.000402078	0.00767322
chr2:73281546-73285309	397.272	-0.666658	0.188411	-3.53832	0.00040268	0.00767702
chr21:10788703-10790505	41.2371	1.18802	0.335765	3.53824	0.000402809	0.00767702
chr1:124305811-124306920	98.6098	1.03095	0.291492	3.53681	0.000404988	0.00770839
chr17:81293921-81296681	459.267	-0.647775	0.183148	-3.53689	0.000404873	0.00770839
chr1:122848440-122849519	94.6139	1.04824	0.296405	3.5365	0.00040546	0.00771227
chr12:117359985-117361736	118.259	-0.83067	0.234922	-3.53594	0.000406326	0.00771844
chr21:5153838-5155323	92.5973	-0.924435	0.261443	-3.53589	0.000406401	0.00771844
chr21:44869474-44875358	679.299	-0.540915	0.152983	-3.53577	0.000406585	0.00771844
chr12:109713214-109720526	721.499	-0.507154	0.143463	-3.53509	0.000407641	0.0077334
chrX:48675384-48677615	242.892	-0.685797	0.194029	-3.5345	0.000408548	0.00774552
chr1:123142721-123143755	38.562	1.19473	0.338068	3.534	0.000409317	0.00774992
chr21:5244665-5245394	19.0092	1.25959	0.356405	3.53417	0.00040906	0.00774992
chr2:27260915-27265812	205.329	-0.69468	0.196616	-3.53318	0.000410599	0.00776911
chr7:158701510-158706016	519.165	-0.593856	0.168099	-3.53278	0.000411216	0.0077757
chr7:139482540-139484258	93.1239	-0.889526	0.251834	-3.53219	0.000412131	0.0077879
chr19:3760452-3763649	330.663	-0.611233	0.173098	-3.53115	0.000413759	0.00781355
chr1:123472082-123472808	17.247	1.24985	0.353986	3.5308	0.000414298	0.00781863
chr5:177302146-177305556	642.762	-0.551637	0.156276	-3.52989	0.000415727	0.00784047
chr3:53845512-53847124	175.929	-0.7845	0.222305	-3.52893	0.000417245	0.00786396
chr13:16148657-16150234	88.257	1.06826	0.302783	3.52813	0.000418505	0.0078723
chr21:45540682-45543252	234.853	-0.737547	0.209045	-3.52818	0.000418433	0.0078723
chr5:178589490-178590834	60.6701	-0.973335	0.275854	-3.52844	0.000418015	0.0078723
chr10:3065668-3071737	536.495	-0.590101	0.167293	-3.52734	0.000419751	0.0078754
chr11:64268599-64270958	398.496	-0.63739	0.180712	-3.52711	0.000420125	0.0078754
chr11:119028788-119031568	315.99	-0.669282	0.189717	-3.52778	0.00041906	0.0078754
chr16:53129601-53133128	421.64	-0.576585	0.163458	-3.52741	0.000419639	0.0078754
chr22:48488692-48493159	484.949	-0.633913	0.17972	-3.52723	0.00041993	0.0078754
chr7:62454614-62454939	17.9018	1.24097	0.351848	3.52699	0.000420305	0.0078754
chr16:714545-717075	111.973	-0.961476	0.272713	-3.52559	0.000422541	0.00789681
chr17:7477444-7481222	409.988	-0.610648	0.17318	-3.52608	0.000421752	0.00789681
chr19:53057336-53058873	103.528	-0.864634	0.245239	-3.52568	0.00042239	0.00789681
chr4:49147261-49148357	65.0606	1.05841	0.300185	3.52586	0.000422105	0.00789681
chr1:124714628-124715193	67.25	1.1287	0.320177	3.52523	0.000423121	0.0079014
chr11:53353980-53354241	18.1845	1.2555	0.356161	3.52509	0.000423333	0.0079014
chr5:179804315-179808649	369.09	-0.714481	0.202702	-3.52478	0.000423829	0.00790555
chr1:3855151-3859412	624.23	-0.585314	0.16609	-3.52407	0.000424967	0.00791865
chr1:123646336-123646687	23.1264	1.23016	0.349118	3.52363	0.000425686	0.00791865
chr10:41855135-41856061	29.6947	1.1996	0.340457	3.52351	0.000425868	0.00791865
chr10:80452943-80456804	547.71	-0.563777	0.16	-3.5236	0.000425725	0.00791865
chr8:142449079-142453644	334.881	-0.725723	0.205967	-3.52349	0.000425902	0.00791865
chr11:3421719-3424392	318.77	-0.659632	0.187223	-3.52324	0.000426301	0.00792097
chr8:23528181-23531463	403.944	-0.649248	0.184342	-3.52198	0.000428337	0.00795369
chr22:37197733-37199983	222.094	-0.675482	0.19181	-3.52163	0.000428905	0.00795913
chr6:31727952-31730977	532.056	-0.637237	0.180985	-3.52093	0.000430035	0.00797496
chr12:56127015-56130222	497.723	-0.544305	0.154609	-3.52053	0.000430691	0.00797689
chr2:56008709-56009954	67.5214	0.963915	0.273791	3.52063	0.00043053	0.00797689
chr1:2228692-2234669	740.479	-0.633275	0.179906	-3.52003	0.0004315	0.00798676
chr13:17252492-17252867	32.0719	1.19814	0.340403	3.51976	0.00043194	0.00798979
chr17:1559124-1563538	314.826	-0.67233	0.191081	-3.51856	0.00043389	0.00802073
chr15:83446495-83450224	414.194	-0.594854	0.169071	-3.51837	0.000434199	0.0080213
chr21:10757971-10759510	41.7575	1.20936	0.343749	3.51816	0.000434549	0.00802263
chr19:6372011-6375020	219.976	-0.728393	0.207089	-3.51729	0.00043598	0.00804391
chr22:21657164-21658991	160.585	-0.793621	0.225647	-3.5171	0.00043629	0.00804451
chr16:4844902-4851204	972.424	-0.4775	0.135791	-3.51644	0.00043737	0.00805413
chr18:80245305-80248160	403.403	-0.638742	0.18164	-3.51654	0.000437215	0.00805413
chr17:81831157-81834707	525.154	-0.641085	0.182378	-3.51515	0.000439509	0.00808836
chr17:81976757-81978908	310.924	-0.703642	0.200193	-3.51482	0.000440045	0.00808919
chr3:16511878-16514431	146.741	-0.765214	0.217713	-3.51478	0.000440114	0.00808919
chr17:40663772-40665567	173.126	0.75145	0.21383	3.51424	0.000441021	0.00810071
chr11:96339847-96343878	541.865	0.594366	0.169224	3.5123	0.000444241	0.00814643
chr12:7129266-7133084	644.738	-0.527164	0.150094	-3.51223	0.000444356	0.00814643
chr21:5227557-5229101	39.8846	1.16198	0.330807	3.51257	0.000443795	0.00814643
chr1:120065176-120069849	442.877	-0.546323	0.155592	-3.51125	0.000445997	0.0081638
chr11:62790418-62792874	220.589	-0.668638	0.190426	-3.51126	0.00044598	0.0081638
chr14:24145736-24149169	529.746	-0.626974	0.178567	-3.51115	0.000446172	0.0081638
chr3:49118946-49121558	453.162	-0.592999	0.168898	-3.51099	0.000446434	0.0081638
chr17:25572900-25573922	24.2424	1.23269	0.351176	3.51019	0.000447793	0.00818348
chrX:15847475-15850315	85.7432	0.883348	0.251666	3.51	0.000448109	0.00818407
chr16:2148262-2150087	60.9514	-1.00615	0.286671	-3.50977	0.000448493	0.00818592
chr1:3622949-3626466	402.347	-0.713761	0.203425	-3.50872	0.000450262	0.0081864
chr11:57458020-57462529	234.448	-0.676472	0.192766	-3.50929	0.000449306	0.0081864
chr11:65538679-65541436	118.351	-0.789462	0.22502	-3.50841	0.000450786	0.0081864
chr16:1492576-1494706	243.304	-0.720113	0.20524	-3.50864	0.000450396	0.0081864
chr16:2531108-2533491	256.551	-0.702625	0.200217	-3.50931	0.000449268	0.0081864
chr17:10196949-10199758	248.158	-0.679311	0.193623	-3.50842	0.000450775	0.0081864
chr4:39974598-39978890	651.801	-0.50193	0.14304	-3.50901	0.000449774	0.0081864
chr7:102671177-102672057	132.935	-0.857261	0.244293	-3.50915	0.000449548	0.0081864
chr10:23693039-23696445	340.123	-0.671593	0.191472	-3.50752	0.000452302	0.00820361
chr3:23990953-23992524	50.7351	0.976932	0.278518	3.50761	0.000452156	0.00820361
chr7:6614767-6616886	228.362	-0.75529	0.215349	-3.50728	0.00045272	0.00820605
chr6:109454062-109457262	474.733	-0.628049	0.179083	-3.50703	0.000453143	0.00820856
chr20:32582714-32585924	254.617	-0.727178	0.207382	-3.50647	0.000454098	0.00822071
chr22:41588098-41591020	356.281	-0.66079	0.188461	-3.50624	0.000454491	0.00822267
chr4:76896556-76898715	171.794	-0.718657	0.205013	-3.50543	0.000455871	0.00824248
chr1:6489765-6491600	151.972	-0.856633	0.244399	-3.50505	0.000456514	0.00824378
chr5:147731312-147733230	63.2494	0.972209	0.277366	3.50514	0.000456362	0.00824378
chr11:116953753-116954178	9.27957	1.23673	0.353033	3.50317	0.00045976	0.00827193
chr15:20421524-20422677	28.0565	1.21879	0.347904	3.50322	0.000459666	0.00827193
chr19:2719738-2722555	297.294	-0.70076	0.200019	-3.50347	0.000459242	0.00827193
chr22:29071563-29074595	179.217	-0.751561	0.214499	-3.5038	0.000458673	0.00827193
chr3:75434002-75437105	369.586	-0.663971	0.189505	-3.50371	0.000458821	0.00827193
chr3:197180411-197184562	261.005	0.806341	0.230176	3.50315	0.00045979	0.00827193
chr13:17439508-17439880	40.1432	1.16977	0.333967	3.50266	0.00046064	0.00828207
chr1:39886083-39887910	68.6098	0.909668	0.259736	3.50228	0.000461294	0.00828865
chr17:23210430-23210653	14.0131	1.25185	0.357458	3.50208	0.000461648	0.00828987
chr17:43831748-43834522	334.618	-0.634648	0.181291	-3.50072	0.000463999	0.00832173
chr22:39457371-39460121	246.993	-0.721859	0.206202	-3.50074	0.000463971	0.00832173
chr20:63625186-63628724	361.656	-0.722851	0.206497	-3.50053	0.000464328	0.00832247
chr15:42735644-42738080	315.637	-0.654142	0.18691	-3.49977	0.000465665	0.00833609
chr21:10350401-10351620	30.8411	1.21141	0.346129	3.49987	0.000465485	0.00833609
chr19:796319-800614	433.459	-0.63766	0.182258	-3.49867	0.000467584	0.00836527
chr6:151493237-151495072	138.488	-0.740241	0.211607	-3.49818	0.000468439	0.00837538
chr20:62120865-62125274	567.89	-0.562404	0.160779	-3.498	0.000468757	0.00837587
chr11:36195421-36197129	116.459	0.807786	0.231045	3.49623	0.000471877	0.00839529
chr17:41810280-41814344	364.996	-0.662215	0.189403	-3.49633	0.000471704	0.00839529
chr17:76351578-76355086	576.657	-0.552998	0.158169	-3.49624	0.000471857	0.00839529
chr20:28773727-28774838	28.6697	1.20819	0.345494	3.497	0.000470514	0.00839529
chr4:52861390-52863420	251.565	-0.698197	0.199673	-3.49671	0.000471034	0.00839529
chr6:26310716-26314921	726.005	0.564154	0.161337	3.49675	0.000470965	0.00839529
chr7:105520616-105523208	341.29	-0.616243	0.176225	-3.4969	0.000470694	0.00839529
chr12:122202604-122205625	290.606	-0.634206	0.181409	-3.496	0.000472295	0.00839754
chr22:26588914-26590821	196.449	-0.697211	0.199449	-3.49569	0.000472829	0.00840187
chr14:71588966-71591076	59.2754	0.987174	0.282453	3.495	0.000474068	0.00841872
chr11:9001625-9005170	228.541	-0.635447	0.181915	-3.4931	0.000477442	0.00847342
chr11:65524006-65526494	261.945	-0.711579	0.203733	-3.4927	0.000478156	0.00848089
chr1:122637030-122637506	29.5643	1.23732	0.354367	3.49164	0.000480067	0.00849176
chr1:204072443-204075648	361.77	-0.639822	0.183236	-3.49178	0.000479807	0.00849176
chr10:102132138-102135382	509.805	-0.59281	0.169793	-3.49138	0.000480533	0.00849176
chr13:110614916-110617801	460.057	-0.54966	0.157431	-3.49143	0.00048044	0.00849176
chr17:750141-753036	390.674	-0.62101	0.177863	-3.49151	0.000480303	0.00849176
chr6:26551727-26557243	882.511	0.581664	0.166577	3.49186	0.000479667	0.00849176
chr15:20653762-20655334	30.1747	1.1635	0.333324	3.49059	0.000481964	0.00851184
chr18:54717403-54719833	273.715	0.686077	0.196618	3.48938	0.000484135	0.00854497
chr6:43075719-43078668	473.918	-0.616339	0.176646	-3.48912	0.000484622	0.00854834
chr17:81910076-81911980	205.396	-0.755343	0.216506	-3.48878	0.000485233	0.0085539
chr1:124707649-124708282	35.04	1.1686	0.335031	3.48803	0.000486601	0.00856651
chr3:39382637-39385658	618.605	-0.53247	0.152662	-3.4879	0.000486838	0.00856651
chr6:44263095-44266123	352.104	-0.642442	0.184191	-3.48791	0.00048682	0.00856651
chr19:11736411-11739638	511.092	-0.581007	0.166592	-3.4876	0.000487371	0.00857066
chr1:123444592-123445904	46.9482	1.14351	0.327901	3.48737	0.000487798	0.00857296
chr1:26169083-26171294	254.02	-0.692561	0.198606	-3.4871	0.00048828	0.00857621
chr1:124363486-124365056	57.169	1.15975	0.332677	3.48612	0.000490082	0.00860263
chr4:12327869-12328962	23.9681	1.22402	0.351143	3.48582	0.000490637	0.00860268
chr7:6854848-6856099	48.9606	-1.02594	0.29432	-3.48579	0.00049068	0.00860268
chr1:124279068-124279481	34.1144	1.18422	0.339776	3.48529	0.000491609	0.00861154
chr13:50122798-50126930	777.501	-0.587652	0.168614	-3.48519	0.000491781	0.00861154
chr17:32265224-32268215	190.181	-0.807725	0.231808	-3.48445	0.000493144	0.00861564
chr20:33662928-33664758	235.366	-0.753129	0.216138	-3.48448	0.000493088	0.00861564
chr20:62804248-62806683	217.437	-0.743019	0.213228	-3.48462	0.000492843	0.00861564
chr6:26326098-26332595	495	0.63163	0.181273	3.48442	0.000493208	0.00861564
chr15:75737425-75739535	209.689	-0.774852	0.222414	-3.48382	0.000494311	0.00861926
chr19:70925-71278	23.6355	-1.21347	0.348286	-3.48411	0.000493773	0.00861926
chr5:123087553-123090707	152.782	-0.752813	0.216082	-3.48392	0.000494128	0.00861926
chr1:44799437-44803296	401.485	-0.570287	0.163752	-3.48264	0.000496503	0.00864914
chr19:17718693-17721416	444.923	-0.586353	0.168368	-3.48257	0.000496623	0.00864914
chr6:90072896-90075736	73.3427	0.929871	0.267053	3.48197	0.000497747	0.0086635
chr22:49916374-49919909	395.09	-0.639447	0.183675	-3.48141	0.00049878	0.00867625
chr1:123352505-123352772	145.102	0.97609	0.280466	3.48025	0.00050095	0.00867969
chr1:226307235-226310361	522.403	-0.57288	0.164619	-3.48003	0.000501362	0.00867969
chr15:80999613-81005744	581.415	-0.518475	0.148986	-3.48002	0.000501381	0.00867969
chr17:6442907-6446251	238.602	-0.636673	0.182908	-3.48084	0.000499851	0.00867969
chr19:46849127-46851280	356.88	-0.553788	0.159101	-3.48074	0.000500039	0.00867969
chr8:76798996-76802469	78.5364	1.00053	0.287479	3.48034	0.000500775	0.00867969
chr8:97868050-97870001	187.376	-0.788545	0.226573	-3.48031	0.000500836	0.00867969
chr9:38619177-38622803	242.195	-0.690825	0.198467	-3.48081	0.000499903	0.00867969
chr20:31949925-31952114	414.375	-0.544335	0.156427	-3.47981	0.000501775	0.0086813
chr19:56594384-56597853	392.277	-0.642824	0.184842	-3.4777	0.000505728	0.00874447
chr1:123233108-123234120	41.3531	1.16401	0.334736	3.47738	0.000506335	0.00874449
chr7:4682510-4685886	315.687	-0.629852	0.181128	-3.47738	0.000506333	0.00874449
chr10:49608976-49614983	213.214	-0.69077	0.198694	-3.47654	0.000507919	0.00874571
chr2:72915557-72921513	235.926	-0.772833	0.222289	-3.4767	0.000507616	0.00874571
chr5:162066464-162071944	559.568	0.57896	0.166519	3.47684	0.000507367	0.00874571
chr7:100427841-100432766	585.775	-0.561354	0.161453	-3.47688	0.000507278	0.00874571
chr8:143739368-143740955	66.5935	-0.969411	0.278841	-3.47657	0.000507876	0.00874571
chr1:123882207-123882956	29.5095	1.21187	0.348671	3.47567	0.00050957	0.00874808
chr18:656106-659848	503.845	-0.577664	0.166197	-3.47578	0.00050937	0.00874808
chr2:130371337-130373644	241.906	-0.71246	0.204979	-3.47577	0.000509392	0.00874808
chr20:63359222-63361389	180.313	-0.749634	0.215664	-3.47593	0.000509086	0.00874808
chr3:148990600-148992661	313.196	-0.648414	0.186551	-3.47581	0.000509314	0.00874808
chr11:83677214-83683003	751.607	0.61446	0.1768	3.47544	0.000510011	0.00874829
chr17:82211278-82213899	460	-0.625783	0.180063	-3.47535	0.000510188	0.00874829
chr11:64240274-64244041	298.397	-0.725252	0.208776	-3.47383	0.000513094	0.0087929
chr15:70091022-70101297	1337.48	-0.468298	0.134818	-3.47356	0.000513596	0.00879629
chr17:51165646-51167855	256.148	-0.67741	0.195028	-3.4734	0.000513903	0.00879633
chr16:4414696-4417471	427.213	-0.620761	0.178742	-3.47294	0.000514784	0.00880145
chr3:28574559-28578580	384.865	-0.598725	0.172398	-3.47293	0.000514812	0.00880145
chr1:124432085-124432431	20.7689	1.20796	0.34784	3.47275	0.00051516	0.00880219
chr22:37905495-37908098	179.34	-0.703885	0.202725	-3.47211	0.000516377	0.00881778
chr11:46388350-46393684	349.783	-0.654308	0.188456	-3.47193	0.000516723	0.00881847
chr17:82030089-82031558	83.1499	-0.980155	0.282322	-3.47177	0.00051704	0.00881868
chr1:121764778-121766367	51.3597	1.12285	0.323448	3.4715	0.000517568	0.00882248
chr13:77574161-77574876	12.4501	1.23893	0.35691	3.47128	0.000517993	0.00882451
chr11:2883358-2886659	248.757	-0.754825	0.217496	-3.47053	0.000519441	0.00884397
chr1:10793222-10797095	202.883	-0.756298	0.217952	-3.47002	0.000520427	0.00885553
chr13:17115250-17115509	34.0778	1.14866	0.331113	3.46907	0.000522255	0.00888141
chr14:62123349-62124783	27.4106	1.16987	0.33726	3.46876	0.000522869	0.00888294
chr8:143017462-143019844	149.708	-0.820136	0.236438	-3.46871	0.00052296	0.00888294
chr17:4583480-4585756	172.066	-0.795381	0.22936	-3.46782	0.000524689	0.00889815
chr17:79776470-79780410	491.677	-0.575487	0.16596	-3.46762	0.000525087	0.00889815
chr3:9932177-9936382	515.135	-0.587072	0.169298	-3.46769	0.000524951	0.00889815
chr5:173887378-173899384	2285.3	0.573128	0.165265	3.46792	0.000524501	0.00889815
chr2:89837822-89839054	58.9649	1.05416	0.304025	3.46733	0.000525659	0.00890262
chr18:68417014-68418100	27.6591	1.13261	0.326674	3.46709	0.000526119	0.00890519
chr7:148337271-148346121	1113.83	0.56993	0.164439	3.46591	0.000528437	0.00893918
chr21:7930540-7933062	64.8347	1.11392	0.321426	3.46557	0.000529112	0.00894536
chr5:73625286-73627105	175.522	-0.711139	0.20522	-3.46526	0.000529724	0.00895047
chr1:110604639-110608134	406.441	-0.619097	0.178671	-3.465	0.00053023	0.00895379
chr10:43104515-43105947	87.7102	-0.916308	0.264494	-3.46439	0.000531442	0.00895611
chr10:133159450-133162157	178.137	-0.805642	0.23256	-3.46424	0.000531734	0.00895611
chr3:50610968-50612734	197.775	-0.796724	0.229991	-3.46415	0.000531917	0.00895611
chr9:63787815-63788429	14.6224	1.23725	0.357134	3.46439	0.000531443	0.00895611
chrX:68199584-68201954	78.3368	0.879667	0.253911	3.46447	0.000531283	0.00895611
chr22:28677297-28680816	504.494	-0.544618	0.157225	-3.46395	0.000532315	0.00895758
chr19:3867361-3869644	86.1068	-0.88576	0.255726	-3.46371	0.000532778	0.00896015
chr10:100985910-100988614	551.015	-0.5911	0.170682	-3.46315	0.000533882	0.0089735
chr1:124038004-124038874	36.2153	1.17378	0.338972	3.46276	0.000534661	0.00898017
chr12:104063141-104067378	837.434	-0.482798	0.13943	-3.46264	0.0005349	0.00898017
chr1:124630401-124630819	56.1747	1.07746	0.311181	3.46248	0.00053523	0.00898049
chr1:226121098-226122999	145.168	-0.730519	0.210995	-3.46226	0.000535656	0.00898242
chr19:20167070-20168686	245.027	0.618605	0.1787	3.4617	0.000536782	0.00899087
chr2:93001961-93002245	15.7159	1.23426	0.356537	3.4618	0.000536583	0.00899087
chr1:26160972-26162526	81.0171	-0.873646	0.252398	-3.46138	0.000537419	0.00899632
chr15:99014411-99016063	107.161	-0.880639	0.254484	-3.46048	0.000539209	0.00902106
chr9:66269539-66270715	82.4494	-0.909871	0.26296	-3.46011	0.000539959	0.00902837
chr1:124250628-124251174	54.7137	1.10992	0.32085	3.45932	0.000541533	0.00904946
chr10:40128146-40128483	34.6287	1.15375	0.333546	3.45903	0.000542117	0.00905398
chr10:42752932-42755485	187.999	-0.797782	0.230684	-3.45833	0.000543531	0.0090595
chr19:2163090-2166751	465.166	-0.554226	0.160262	-3.45825	0.000543702	0.0090595
chr6:157981119-157982706	135.244	-0.818691	0.236707	-3.45867	0.000542854	0.0090595
chr7:143360680-143363853	334.618	-0.608804	0.176038	-3.45838	0.000543444	0.0090595
chr15:20665922-20668573	59.6192	1.13742	0.328918	3.45807	0.000544056	0.00906018
chr1:124485949-124486343	43.1741	1.17729	0.34053	3.45724	0.000545744	0.00907782
chr21:36155670-36158644	514.449	-0.566124	0.163745	-3.45736	0.000545503	0.00907782
chr7:5779345-5782254	415.369	-0.565154	0.163478	-3.45706	0.000546106	0.00907863
chr6:99613035-99614951	79.1106	-0.87967	0.254511	-3.45631	0.000547633	0.00909877
chr16:50750024-50751271	35.6917	1.10146	0.318723	3.45584	0.000548574	0.00910106
chr19:5679271-5682905	531.853	-0.63233	0.182978	-3.45577	0.000548716	0.00910106
chr5:175871451-175873935	177.408	-0.722568	0.209082	-3.45591	0.00054843	0.00910106
chrX:130883521-130888414	447.46	0.72202	0.208984	3.4549	0.000550491	0.00912527
chr10:11822909-11824316	156.811	-0.788885	0.22835	-3.45473	0.000550849	0.00912597
chr1:207866594-207869848	250.705	-0.707863	0.20494	-3.454	0.000552335	0.009138
chr12:57237542-57243887	399.205	-0.582937	0.168762	-3.4542	0.000551926	0.009138
chr12:122964556-122967087	329.937	-0.624551	0.180862	-3.45319	0.000553991	0.009138
chr14:92322218-92324389	160.364	-0.748123	0.21666	-3.45298	0.000554422	0.009138
chr16:2194474-2196542	196.033	-0.760898	0.220359	-3.45299	0.000554414	0.009138
chr16:3022469-3024942	227.041	-0.677422	0.196175	-3.45315	0.000554083	0.009138
chr17:24980974-24981322	12.9048	1.23431	0.357375	3.45381	0.000552723	0.009138
chr8:12584310-12585954	35.4012	1.09388	0.316738	3.45359	0.000553187	0.009138
chrY:11312145-11313613	79.503	1.01423	0.293678	3.45354	0.000553278	0.009138
chr1:124351489-124351778	32.4618	1.15333	0.334046	3.4526	0.000555211	0.00914579
chr1:124146742-124147120	33.2642	1.20963	0.350414	3.45201	0.000556433	0.00915983
chr4:113011907-113013539	41.0042	1.08764	0.315087	3.45188	0.000556697	0.00915983
chr18:45415241-45417265	53.1133	1.00735	0.291852	3.45159	0.000557286	0.00916429
chr11:122067184-122072279	251.694	0.728721	0.211182	3.45067	0.000559194	0.00918626
chr19:1603154-1606819	503.396	-0.573764	0.166295	-3.45028	0.00056	0.00918626
chr19:48393263-48398343	272.763	-0.716816	0.207771	-3.45003	0.000560529	0.00918626
chr20:9160581-9161270	16.6566	1.21835	0.353132	3.45014	0.000560305	0.00918626
chr20:28813922-28815748	44.7985	1.07256	0.310877	3.45012	0.000560332	0.00918626
chr8:17716821-17723090	889.811	0.642691	0.186277	3.45018	0.000560208	0.00918626
chr19:18939524-18941940	239.206	-0.737236	0.21371	-3.4497	0.000561212	0.00918751
chr2:174681074-174683907	341.868	-0.572784	0.16604	-3.44968	0.000561242	0.00918751
chr6:35317363-35319181	192.226	-0.686844	0.199133	-3.44917	0.000562317	0.0091999
chr11:64244080-64248018	529.031	-0.655633	0.190109	-3.44871	0.000563263	0.00920329
chr22:49852487-49853770	207	-0.671207	0.194623	-3.44875	0.000563181	0.00920329
chrX:154368367-154372338	373.879	-0.650595	0.188654	-3.44861	0.00056348	0.00920329
chr4:150206069-150207947	52.6273	1.03639	0.300611	3.44763	0.000565529	0.00923154
chr11:70396693-70400643	557.824	-0.550568	0.159711	-3.44728	0.000566266	0.00923313
chr22:30288392-30290278	191.988	-0.823357	0.238836	-3.44738	0.000566059	0.00923313
chr1:123422500-123423932	65.0892	1.06151	0.307992	3.44657	0.000567757	0.00924306
chr2:235493062-235497990	468.313	-0.563475	0.163491	-3.44653	0.000567834	0.00924306
chr6:31793330-31796644	556.711	-0.536495	0.155651	-3.44679	0.000567299	0.00924306
chr20:31157209-31158430	54.5755	1.07666	0.312426	3.44614	0.000568662	0.00924671
chr5:6631016-6635550	884.097	-0.471703	0.136882	-3.44607	0.000568812	0.00924671
chr9:66152459-66154443	63.6061	-0.9851	0.28587	-3.44597	0.000569018	0.00924671
chr13:99199353-99203018	650.946	-0.577066	0.167487	-3.44544	0.000570122	0.00925225
chr16:71625842-71627069	101.011	-0.882207	0.256044	-3.44552	0.000569952	0.00925225
chr8:22599575-22600939	99.9502	-0.846826	0.245788	-3.44535	0.00057032	0.00925225
chr13:42039328-42042996	492.241	-0.55794	0.161962	-3.44487	0.000571335	0.00925733
chr17:49575375-49577821	183.533	-0.808453	0.234711	-3.44447	0.000572183	0.00925733
chr4:155758725-155762149	393.423	-0.633171	0.183806	-3.44478	0.00057152	0.00925733
chr8:2000737-2002066	65.4734	-0.975306	0.283152	-3.44446	0.000572211	0.00925733
chr9:98118541-98119984	95.6114	-0.861533	0.250123	-3.44444	0.000572235	0.00925733
chr13:75479889-75483442	575.626	-0.513953	0.149231	-3.44401	0.000573158	0.00926707
chr14:102183290-102186109	115.175	0.77861	0.226114	3.44344	0.000574371	0.00928149
chr12:42481943-42485243	433.264	-0.526972	0.153054	-3.44305	0.000575199	0.00928967
chr13:20192045-20194464	183.103	-0.733987	0.213201	-3.4427	0.000575928	0.00929107
chr20:35282922-35285740	498.794	-0.548051	0.159185	-3.44285	0.000575624	0.00929107
chr1:123371051-123371671	20.6815	1.2306	0.357537	3.44187	0.0005777	0.00930924
chr9:41230366-41231111	17.1785	1.22184	0.354988	3.44191	0.000577632	0.00930924
chr7:80913625-80920482	731.307	0.580703	0.168731	3.4416	0.000578282	0.00931344
chr1:122517914-122520958	127.938	0.992194	0.288338	3.44107	0.000579409	0.00932639
chr9:15248028-15250628	149.147	0.764212	0.222099	3.44087	0.000579849	0.00932828
chr17:75108990-75112094	307.607	-0.606263	0.17622	-3.44038	0.000580896	0.0093369
chrX:153721578-153725332	313.819	-0.61346	0.178315	-3.44032	0.000581031	0.0093369
chr13:17861075-17861721	28.0036	1.21422	0.352985	3.43985	0.000582039	0.00934285
chr22:17999507-18002493	359.296	-0.609975	0.177326	-3.43984	0.000582049	0.00934285
chr2:63035355-63036114	15.8912	1.22192	0.355302	3.4391	0.000583647	0.0093633
chr7:10121170-10123336	66.1581	0.935553	0.272065	3.43872	0.00058448	0.00936626
chr7:100894416-100897878	343.35	-0.698503	0.203123	-3.43882	0.000584246	0.00936626
chr15:80778579-80781013	196.416	-0.725321	0.211006	-3.43744	0.000587231	0.00940514
chr10:133377834-133380455	237.327	-0.742129	0.215989	-3.43595	0.000590475	0.00945185
chr3:51670490-51672716	336.58	-0.686556	0.199837	-3.43558	0.000591296	0.00945976
chr16:75462226-75465749	578.821	-0.52238	0.152063	-3.43529	0.000591915	0.00946441
chr11:60923581-60927448	531.029	-0.611494	0.17809	-3.43362	0.00059557	0.00949172
chr2:70899696-70902606	244.423	-0.707915	0.20616	-3.43381	0.000595162	0.00949172
chr21:10760803-10761471	17.3698	1.21299	0.353225	3.43405	0.000594632	0.00949172
chr4:1344698-1348657	557.908	-0.573441	0.167008	-3.43361	0.000595594	0.00949172
chr5:71289908-71290336	38.4213	-1.06501	0.310141	-3.43395	0.000594855	0.00949172
chr8:26448022-26450750	274.175	-0.718957	0.209372	-3.43387	0.000595037	0.00949172
chr8:75322809-75324815	114.586	0.840826	0.244898	3.43337	0.000596134	0.00949509
chr4:49126491-49127503	34.5793	1.10106	0.320729	3.43299	0.000596958	0.00950298
chr17:489379-490379	64.28	-0.99387	0.289551	-3.43245	0.000598162	0.00951691
chr1:155973542-155979572	915.657	-0.496731	0.144792	-3.43066	0.000602113	0.0095745
chr15:67064731-67068923	343.675	-0.61354	0.178914	-3.42925	0.000605255	0.00961916
chr1:123985230-123986807	46.2741	1.14528	0.334043	3.42854	0.00060683	0.0096389
chr1:153677499-153680531	222.915	-0.68625	0.200205	-3.42773	0.000608649	0.00966246
chr19:1939513-1944066	488.792	-0.580437	0.169358	-3.42729	0.000609641	0.00967291
chr9:21558665-21560365	197.791	-0.715622	0.208826	-3.42687	0.000610573	0.00968238
chr1:122777235-122777536	22.9007	1.19296	0.34818	3.42629	0.000611896	0.00969803
chr1:122971490-122972021	22.725	1.1738	0.342634	3.42582	0.000612948	0.00969874
chr2:89833253-89834554	52.1728	1.10939	0.323832	3.42582	0.000612935	0.00969874
chr7:108000993-108004249	405.085	-0.591262	0.17259	-3.42583	0.000612931	0.00969874
chr1:32350803-32352926	196.66	-0.711886	0.207811	-3.42564	0.000613346	0.00969973
chr2:74552344-74555721	347.48	-0.647282	0.18898	-3.42514	0.000614487	0.00971246
chr19:55113325-55119186	592.457	-0.53751	0.156959	-3.42453	0.000615873	0.00972904
chr1:11679154-11682347	379.971	-0.648452	0.189404	-3.42364	0.000617889	0.00975555
chr2:35961994-35964091	44.8541	0.983202	0.287253	3.42277	0.000619861	0.00978134
chr17:21375556-21378964	166.144	-0.687254	0.200809	-3.42243	0.000620644	0.00978835
chr1:36306183-36308296	180.928	-0.770551	0.225183	-3.42189	0.000621865	0.00979692
chr19:20367342-20368730	53.8102	0.923949	0.270004	3.42199	0.000621654	0.00979692
chr21:31871526-31876612	731.272	-0.556181	0.162543	-3.42174	0.000622218	0.00979714
chr1:124648436-124649173	30.7827	1.18557	0.346562	3.42095	0.000624036	0.00981506
chrX:96684084-96686628	356.113	-0.625419	0.182816	-3.42104	0.000623831	0.00981506
chr15:92392152-92397509	832.657	-0.575028	0.168138	-3.41997	0.000626281	0.00984475
chr16:87764375-87766866	584.832	-0.560238	0.16382	-3.41983	0.000626605	0.00984475
chr1:1538736-1541153	125.492	-0.832523	0.243489	-3.41914	0.000628203	0.00986255
chr1:122870223-122870849	82.0123	1.05952	0.309888	3.41904	0.000628421	0.00986255
chr1:125084822-125085240	14.826	1.22138	0.357294	3.41841	0.000629891	0.0098749
chr21:9891058-9892668	31.1999	1.18154	0.345631	3.41849	0.00062969	0.0098749
chr11:72812030-72815716	460.167	-0.620913	0.181654	-3.4181	0.000630597	0.0098806
chr13:17128166-17128479	16.95	1.21248	0.354809	3.41726	0.000632555	0.00990591
chr5:56230786-56234043	263.49	0.732183	0.214279	3.41696	0.00063324	0.00991127
chr5:46625141-46625595	12.0764	1.22161	0.357541	3.4167	0.000633844	0.00991535
chr1:123856301-123856873	18.4206	1.21621	0.355984	3.41647	0.00063438	0.00991837
chr1:51418177-51424070	981.874	0.695597	0.203615	3.41623	0.000634952	0.00992173
chr5:177401993-177404915	146.866	-0.766044	0.224246	-3.41609	0.000635282	0.00992173
chr15:78640365-78641997	88.1178	-0.860322	0.251856	-3.41593	0.000635637	0.00992191
chr6:72619696-72623929	425.688	-0.572839	0.167746	-3.41491	0.000638037	0.00995399
chr13:16133528-16134517	47.4286	1.14729	0.335994	3.41462	0.000638715	0.0099592
chr3:38135172-38139985	669.662	-0.508257	0.148862	-3.41429	0.000639485	0.00996582
chr20:26727755-26728010	24.0628	1.20611	0.353306	3.41378	0.000640672	0.00997894
chr20:13219343-13222693	198.947	-0.719337	0.210873	-3.41123	0.000646715	0.0100622
chr7:104413921-104414603	18.0675	1.20504	0.353254	3.41125	0.000646653	0.0100622
chr1:123294763-123295135	15.3655	1.20748	0.354072	3.41028	0.000648968	0.010081
chr8:144851484-144854475	415.16	-0.669215	0.19623	-3.41036	0.000648783	0.010081
chr9:136948982-136951287	191.299	-0.782662	0.229498	-3.41032	0.000648873	0.010081
chr18:46071350-46072827	180.059	-0.819813	0.240437	-3.40968	0.000650389	0.0100976
chr15:20670460-20673181	59.4376	1.13197	0.332026	3.40929	0.000651317	0.0101066
chr1:17010247-17012852	320.89	-0.675737	0.198242	-3.40866	0.000652834	0.0101247
chr12:56256147-56259461	481.207	-0.548637	0.160978	-3.40815	0.000654043	0.010138
chr1:124411607-124411842	12.466	1.21281	0.355932	3.40742	0.000655803	0.0101507
chr12:118134770-118138124	620.273	-0.483541	0.141901	-3.40759	0.00065539	0.0101507
chr17:38600676-38607412	354.314	-0.626383	0.183832	-3.40737	0.000655915	0.0101507
chr6:157069304-157070132	19.0725	1.19977	0.352141	3.40708	0.000656618	0.0101561
chr9:135959403-135962095	352.183	-0.590399	0.173297	-3.40685	0.000657161	0.0101591
chr5:112624850-112626736	79.6282	0.937559	0.275214	3.40666	0.00065764	0.0101611
chr11:64316354-64319994	644.888	-0.507063	0.148882	-3.4058	0.000659698	0.0101874
chr19:7394069-7396927	515.423	-0.563095	0.165399	-3.40447	0.000662914	0.0102316
chr1:122866926-122867593	21.8811	1.18697	0.348707	3.40392	0.000664259	0.0102404
chr1:122927640-122928373	25.5785	1.19869	0.352162	3.4038	0.000664548	0.0102404
chr14:77799530-77801214	236.939	-0.661645	0.19438	-3.40388	0.000664356	0.0102404
chr1:23528714-23532158	264.477	-0.693473	0.203745	-3.40364	0.000664946	0.0102411
chr1:123588635-123589268	20.2792	1.21106	0.355859	3.40318	0.000666052	0.0102527
chr10:71963455-71966848	370.22	-0.625005	0.183667	-3.40294	0.000666659	0.0102565
chr13:16589562-16590019	19.0732	1.18011	0.34686	3.40228	0.000668251	0.0102592
chr19:58227100-58230303	297.003	-0.623759	0.183335	-3.40228	0.000668251	0.0102592
chr2:119155594-119159387	150.059	-0.757923	0.222763	-3.40237	0.000668034	0.0102592
chr7:66075179-66077162	268.267	-0.701386	0.206133	-3.40258	0.000667518	0.0102592
chr21:9005871-9007985	44.0539	1.11517	0.327793	3.40205	0.000668827	0.0102626
chr8:109602968-109609338	571.246	0.598278	0.175867	3.40187	0.000669253	0.0102637
chr9:83061505-83063721	183.07	-0.708969	0.208415	-3.40171	0.000669647	0.0102643
chr9:62834985-62835420	17.676	1.21113	0.356056	3.40151	0.000670152	0.0102665
chr10:42103892-42104948	36.7949	1.13954	0.335077	3.40082	0.000671837	0.0102789
chr19:17950102-17953671	191.859	-0.767353	0.225626	-3.40099	0.000671418	0.0102789
chr21:7926134-7927035	38.0768	1.13503	0.33376	3.40075	0.000672023	0.0102789
chr1:47436756-47439226	90.2172	-0.906749	0.266684	-3.40009	0.000673637	0.0102981
chr22:45007772-45011152	623.178	-0.598731	0.176148	-3.39903	0.000676264	0.0103328
chr15:90100239-90103559	465.679	-0.557399	0.163996	-3.39885	0.000676695	0.0103339
chr7:84610630-84613182	56.5479	1.00293	0.2951	3.39862	0.000677258	0.010337
chr12:13043746-13048471	446.886	-0.509279	0.149858	-3.39841	0.000677786	0.0103396
chr1:124749394-124750917	44.2379	1.16335	0.342345	3.39818	0.000678346	0.0103427
chr1:123873355-123873780	15.9474	1.21277	0.356954	3.39756	0.000679891	0.0103608
chr15:38563398-38565501	202.413	-0.74881	0.220457	-3.39663	0.000682207	0.0103906
chr11:406103-407179	32.1474	-1.09565	0.322628	-3.39601	0.000683763	0.0104088
chr19:5975390-5980002	598.865	-0.580032	0.170835	-3.39527	0.000685603	0.0104313
chr17:80144505-80148738	876.012	-0.470795	0.138679	-3.39485	0.000686672	0.0104421
chr15:77816721-77822223	392.643	-0.618717	0.182267	-3.39456	0.000687397	0.0104476
chr17:17780717-17786289	443.341	-0.600674	0.176974	-3.39414	0.000688452	0.0104527
chr19:55085566-55088716	395.662	-0.620005	0.182666	-3.3942	0.000688302	0.0104527
chr14:21068297-21072540	486.099	-0.649765	0.191508	-3.39289	0.000691604	0.0104651
chr14:29459232-29462374	79.1861	0.921345	0.271557	3.39282	0.000691761	0.0104651
chr17:45239203-45242769	366.192	-0.617874	0.182088	-3.39328	0.000690616	0.0104651
chr18:77131172-77133320	112.444	-0.893139	0.263184	-3.3936	0.000689814	0.0104651
chr19:47225562-47231922	383.579	-0.675383	0.199025	-3.39345	0.000690173	0.0104651
chr20:46306812-46309228	145.517	-0.757576	0.223292	-3.39277	0.000691904	0.0104651
chr21:10800254-10801610	38.769	1.11867	0.329718	3.3928	0.00069181	0.0104651
chr3:134180525-134181403	16.1577	1.20125	0.354073	3.39266	0.000692166	0.0104651
chr5:179059602-179061859	136.547	-0.789547	0.232733	-3.39251	0.000692558	0.0104655
chr16:1608812-1616546	1168.43	-0.475501	0.140196	-3.39169	0.00069464	0.0104915
chr7:37920349-37922603	324.575	-0.568219	0.16756	-3.39114	0.000696038	0.0105042
chr9:41357994-41359646	144.67	-0.849899	0.250629	-3.39107	0.000696206	0.0105042
chr10:99328494-99334147	479.778	-0.535935	0.158078	-3.39032	0.000698103	0.0105273
chr1:122553511-122554047	22.8687	1.18164	0.348572	3.38995	0.00069905	0.0105284
chr1:247330052-247334289	554.573	-0.60295	0.177868	-3.38987	0.000699267	0.0105284
chr2:38073669-38077802	319.41	-0.634828	0.187263	-3.39004	0.000698836	0.0105284
chr10:5976592-5978569	134.485	-0.806541	0.237939	-3.3897	0.000699699	0.0105294
chr1:109493580-109495524	244.441	-0.609654	0.179888	-3.38908	0.000701285	0.0105478
chr1:236280304-236283162	442.287	-0.549927	0.162289	-3.38857	0.00070258	0.0105562
chr15:33310060-33312849	318.191	-0.637739	0.188197	-3.38868	0.000702301	0.0105562
chr2:225041042-225043329	201.276	-0.67308	0.198649	-3.38829	0.000703304	0.0105616
chr5:181052250-181054660	244.184	-0.679405	0.200554	-3.38765	0.000704943	0.0105807
chr22:37952584-37955438	550.202	-0.532219	0.157119	-3.38735	0.000705702	0.0105866
chr3:160224459-160227240	251.317	-0.685823	0.202495	-3.38687	0.000706954	0.0105999
chrX:154435890-154439973	291.432	-0.610822	0.18042	-3.38556	0.000710336	0.0106451
chr12:111594499-111601131	932.647	-0.441524	0.130426	-3.38523	0.000711174	0.0106521
chr1:123086008-123086377	23.4388	1.18666	0.350728	3.38341	0.000715909	0.0107119
chr1:124428784-124429335	32.3379	1.1753	0.347364	3.3835	0.000715692	0.0107119
chr1:1068170-1069949	113.783	-0.811481	0.239862	-3.38312	0.000716675	0.0107179
chr1:1598933-1599920	31.537	-1.11383	0.329316	-3.38225	0.000718945	0.0107192
chr1:123134711-123135216	25.3388	1.17864	0.348479	3.38223	0.000718992	0.0107192
chr17:29914230-29915773	43.1786	1.02087	0.301829	3.38227	0.000718903	0.0107192
chr5:270731-273904	405.851	-0.578779	0.171115	-3.3824	0.000718557	0.0107192
chr5:97139321-97143122	305.26	0.694373	0.205268	3.38277	0.000717595	0.0107192
chr5:179906278-179908460	164.316	-0.738124	0.218205	-3.38271	0.000717753	0.0107192
chr11:110140026-110143283	76.4089	0.955992	0.282677	3.38192	0.000719816	0.010726
chr2:27368686-27372523	794.785	-0.504927	0.14931	-3.38174	0.000720279	0.0107273
chr11:53788077-53788324	18.2043	1.20826	0.357328	3.38136	0.000721267	0.0107344
chr12:120709563-120712856	464.708	-0.519248	0.153566	-3.38128	0.000721497	0.0107344
chr5:66958553-66961232	125.393	0.755625	0.223483	3.38113	0.00072188	0.0107346
chr19:924576-928071	564.031	-0.60459	0.178836	-3.38069	0.00072303	0.0107461
chr12:123383126-123385804	313.451	-0.586968	0.173636	-3.38045	0.000723679	0.0107503
chr6:46321629-46327038	795.969	0.604195	0.178744	3.38023	0.000724254	0.0107533
chr8:92054711-92072318	1106.69	0.618908	0.183132	3.37958	0.000725955	0.0107694
chrX:74419126-74424220	453.044	-0.586379	0.173509	-3.37954	0.000726084	0.0107694
chr15:28884732-28888657	456.586	-0.625608	0.185142	-3.37908	0.000727292	0.0107707
chr19:17538471-17539907	126.453	-0.833827	0.246756	-3.37915	0.00072709	0.0107707
chr9:88533986-88536263	117.264	-0.865086	0.255995	-3.37932	0.000726665	0.0107707
chr11:68029073-68032016	421.131	-0.565277	0.167323	-3.37836	0.0007292	0.0107934
chr17:81487332-81490445	122.028	-0.871551	0.257994	-3.37818	0.000729664	0.0107948
chr20:29508677-29509780	22.5664	1.18801	0.351719	3.37774	0.000730854	0.0108013
chr20:36676831-36677605	21.1712	-1.1619	0.343978	-3.37784	0.000730568	0.0108013
chr15:90956169-90958184	153.559	-0.790588	0.23407	-3.37757	0.000731284	0.0108021
chr1:123446403-123446829	18.2984	1.19929	0.355165	3.3767	0.000733612	0.010803
chr1:123567506-123567783	18.4124	1.19642	0.354316	3.3767	0.000733605	0.010803
chr19:41858934-41862395	466.088	-0.505488	0.149685	-3.37702	0.000732761	0.010803
chr2:70551444-70555037	345.439	-0.547394	0.162115	-3.37657	0.000733957	0.010803
chr21:7915876-7918359	56.9423	1.10702	0.327784	3.37729	0.000732035	0.010803
chr3:143847003-143848965	223.56	0.62792	0.18593	3.37719	0.000732311	0.010803
chrY:56858532-56859086	21.5091	1.17566	0.348168	3.3767	0.000733617	0.010803
chr1:123428680-123428990	13.4768	1.20505	0.356937	3.37609	0.000735249	0.0108165
chr1:122801586-122802855	56.9528	1.12566	0.333479	3.37552	0.000736771	0.0108315
chr14:30298967-30299808	17.2904	1.20392	0.356673	3.37542	0.000737021	0.0108315
chr1:27391755-27393401	149.535	-0.734252	0.217584	-3.37456	0.00073934	0.010849
chr14:23363629-23367094	150.659	-0.763271	0.226179	-3.37463	0.000739151	0.010849
chr19:27383742-27385027	30.0346	1.14579	0.339513	3.37479	0.000738714	0.010849
chr21:7923764-7924307	14.6001	1.2054	0.357305	3.37359	0.00074194	0.0108817
chr1:123789214-123789456	39.3117	1.08536	0.321755	3.37327	0.000742823	0.0108891
chr7:22188951-22195628	936.232	0.518556	0.153732	3.37311	0.00074324	0.0108897
chr19:12399453-12402132	392.458	-0.620771	0.184051	-3.37282	0.000744017	0.01089
chr19:53536675-53540151	280.913	-0.593636	0.176	-3.37292	0.000743746	0.01089
chr18:46172802-46176928	656.459	-0.542135	0.16076	-3.37233	0.000745359	0.0109041
chr1:123432007-123433095	29.1822	1.1518	0.341774	3.37005	0.000751556	0.0109892
chr2:218009416-218011296	115.892	-0.813307	0.241345	-3.3699	0.000751963	0.0109896
chr17:81935933-81938163	240.167	-0.739839	0.219563	-3.3696	0.000752773	0.0109959
chr17:4986304-4988980	372.761	-0.662274	0.196566	-3.36923	0.000753793	0.0110052
chr1:9180804-9183947	142.067	-0.757696	0.224925	-3.36866	0.000755337	0.0110208
chr12:48786807-48790569	441.286	-0.568916	0.168897	-3.36842	0.000756005	0.0110208
chr19:19668100-19670551	342.745	-0.636963	0.189098	-3.36842	0.000755991	0.0110208
chr19:17685907-17688994	460.34	-0.615384	0.1827	-3.36828	0.000756399	0.011021
chr17:4965894-4970201	650.771	-0.532046	0.157987	-3.36765	0.000758131	0.0110351
chr17:7650280-7653624	422.767	-0.593163	0.176156	-3.36727	0.000759163	0.0110351
chr17:73641774-73646056	389.148	-0.653583	0.194087	-3.36747	0.000758613	0.0110351
chr19:51686823-51693086	872.009	-0.50832	0.150961	-3.36723	0.000759273	0.0110351
chr8:33563516-33568087	822.136	-0.508303	0.150955	-3.36726	0.000759201	0.0110351
chr12:53251243-53253823	332.685	-0.575183	0.170858	-3.36643	0.000761471	0.0110503
chr5:159087452-159103269	1800.56	0.421055	0.125074	3.36644	0.00076145	0.0110503
chr8:74256829-74257675	20.7411	1.1517	0.342107	3.3665	0.00076128	0.0110503
chr3:38648713-38650365	98.7946	-0.816043	0.24242	-3.36624	0.000762014	0.0110526
chr6:111258802-111261230	293.521	-0.605814	0.179983	-3.36595	0.000762795	0.0110584
chr3:86990009-86992312	226.887	-0.70013	0.208057	-3.36509	0.000765199	0.0110877
chr3:10010089-10011906	168.169	-0.751912	0.223477	-3.3646	0.000766549	0.0111017
chr12:459167-461449	207.154	-0.710091	0.211102	-3.36374	0.000768939	0.0111307
chr13:17758409-17758725	12.2215	1.20192	0.357419	3.36277	0.000771642	0.0111643
chr3:32105993-32108082	298.885	-0.639648	0.190236	-3.3624	0.000772679	0.0111737
chr21:40843846-40847933	279.077	0.574627	0.17092	3.36197	0.000773886	0.0111802
[truncated: 28,061 more rows]

## Sheet: DESeq2_BCKDK-SVA-KO_H3K27ac
Peak location	base mean	log2FC	StdErr	Wald-Stats	P-value	Padj
chr15:56732009-56733398	32.8464	-1.33992	0.271601	-4.9334	8.08089e-07	0.0504425
chr17:23068659-23069082	119.778	1.07942	0.259578	4.15835	3.20555e-05	0.66699
chr20:31070505-31074448	138.327	1.0166	0.240762	4.22243	2.4168e-05	0.66699
chr5:49599399-49603057	637.09	0.951679	0.233149	4.08185	4.46788e-05	0.697235
chr16:37815616-37815985	75.0943	1.02261	0.267118	3.82828	0.00012904	0.910425
chr20:31053493-31056206	107.382	0.921448	0.238482	3.8638	0.000111636	0.910425
chr4:49096050-49100566	307.18	0.896561	0.233201	3.84459	0.000120754	0.910425
chr4:49656992-49657924	179.129	0.918029	0.241712	3.79803	0.00014585	0.910425
chr5:49656311-49661914	891.221	0.863991	0.227295	3.80119	0.000144	0.910425
chr5:150904370-150905980	71.6078	0.939381	0.246437	3.81185	0.000137931	0.910425
chr1:190708-191818	33.1287	0.0650881	0.265537	0.245119	0.806364	0.999963
chr1:777575-779866	98.1419	0.0541062	0.266269	0.203202	0.838978	0.999963
chr1:826571-827874	28.9234	0.268635	0.274046	0.980256	0.32696	0.999963
chr1:905059-905729	11.284	0.316666	0.255442	1.23968	0.215093	0.999963
chr1:958675-959594	16.4622	0.217911	0.272892	0.798525	0.424566	0.999963
chr1:997947-1002263	111.61	0.194359	0.275806	0.704695	0.481	0.999963
chr1:1017960-1019749	22.8322	0.459124	0.272386	1.68557	0.0918795	0.999963
chr1:1032371-1034947	44.3692	0.469226	0.275052	1.70596	0.0880161	0.999963
chr1:1094684-1096049	36.6096	0.0776457	0.265379	0.292584	0.76984	0.999963
chr1:1098933-1099961	22.0407	0.178397	0.273788	0.651587	0.514667	0.999963
chr1:1115806-1116109	6.60343	-0.0803844	0.247911	-0.324247	0.745751	0.999963
chr1:1157562-1158660	18.2854	0.212678	0.260143	0.817543	0.413618	0.999963
chr1:1175514-1176950	19.6255	-0.0186432	0.27107	-0.0687764	0.945168	0.999963
chr1:1230806-1232026	36.6063	0.341988	0.275788	1.24004	0.214961	0.999963
chr1:1272839-1274997	41.8249	0.106086	0.274682	0.386212	0.69934	0.999963
chr1:1304410-1305618	36.8436	0.16626	0.274975	0.604636	0.545421	0.999963
chr1:1306048-1306551	6.89383	-0.00440517	0.234067	-0.0188201	0.984985	0.999963
chr1:1306694-1307713	20.8123	0.248569	0.258817	0.960402	0.336853	0.999963
chr1:1308054-1309219	21.6288	0.0664731	0.269168	0.246958	0.804941	0.999963
chr1:1324271-1325543	27.583	0.206789	0.269827	0.766378	0.443451	0.999963
chr1:1349644-1349946	8.07118	0.0148977	0.250174	0.0595493	0.952515	0.999963
chr1:1374533-1376659	79.6985	0.175864	0.271845	0.646929	0.517678	0.999963
chr1:1398078-1400388	59.3769	0.151625	0.27598	0.549407	0.582726	0.999963
chr1:1406415-1408576	46.7979	0.174181	0.27575	0.631665	0.527606	0.999963
chr1:1470621-1472889	61.6223	0.204617	0.260647	0.785035	0.432433	0.999963
chr1:1504565-1506062	29.0419	0.0741134	0.276066	0.268463	0.788343	0.999963
chr1:1511020-1512339	28.8231	0.256292	0.275387	0.930661	0.352029	0.999963
chr1:1573411-1575861	126.415	0.126337	0.264418	0.477792	0.632798	0.999963
chr1:1614155-1616609	68.6795	0.2482	0.272674	0.910245	0.362694	0.999963
chr1:1657027-1657384	8.35049	-0.2185	0.252003	-0.867053	0.385913	0.999963
chr1:1658041-1660198	69.6707	0.0608132	0.26238	0.231775	0.816713	0.999963
chr1:1692352-1693367	39.504	0.150442	0.27203	0.553033	0.580241	0.999963
chr1:1723693-1725343	38.8111	0.156028	0.275496	0.56635	0.571156	0.999963
chr1:1743704-1744091	9.05996	0.0827278	0.253628	0.326178	0.74429	0.999963
chr1:1745734-1746657	31.6168	0.125264	0.271917	0.460669	0.645036	0.999963
chr1:1812510-1815403	48.5132	-0.238831	0.261488	-0.913353	0.361057	0.999963
chr1:1827095-1827595	11.317	-0.0279174	0.270014	-0.103392	0.917652	0.999963
chr1:1857541-1859172	34.4467	0.175314	0.268174	0.653732	0.513285	0.999963
chr1:1889007-1890534	87.2927	-0.05517	0.256392	-0.215178	0.829628	0.999963
chr1:1890952-1892468	24.6815	0.200784	0.273927	0.732984	0.463568	0.999963
chr1:1908360-1909024	13.9652	0.217181	0.267179	0.812868	0.416294	0.999963
chr1:1909477-1909983	8.97441	0.0413928	0.251133	0.164824	0.869082	0.999963
chr1:2014715-2015829	17.6031	0.0763825	0.276057	0.276691	0.782017	0.999963
chr1:2073115-2075179	61.1892	0.11656	0.275803	0.422623	0.672571	0.999963
chr1:2126932-2129456	55.506	0.440637	0.273655	1.61019	0.107356	0.999963
chr1:2132375-2133261	16.9561	0.123754	0.274825	0.450301	0.652493	0.999963
chr1:2188706-2190582	62.1764	0.0116148	0.274425	0.042324	0.96624	0.999963
chr1:2194926-2196239	23.0427	0.273367	0.273414	0.999827	0.317394	0.999963
chr1:2211549-2215096	137.893	0.16814	0.273604	0.614537	0.53886	0.999963
chr1:2226674-2227667	14.6819	0.377238	0.263268	1.4329	0.151885	0.999963
chr1:2228963-2230558	26.0743	0.0906087	0.275389	0.329021	0.74214	0.999963
chr1:2230894-2232673	26.4136	-0.140386	0.275258	-0.510014	0.610042	0.999963
chr1:2255485-2256539	15.0547	0.116114	0.273033	0.425277	0.670635	0.999963
chr1:2278869-2279437	7.66141	0.0972309	0.247442	0.392945	0.69436	0.999963
chr1:2318120-2319758	31.3213	0.256502	0.274866	0.933188	0.350723	0.999963
chr1:2349307-2350292	20.3646	0.0553664	0.275539	0.200939	0.840747	0.999963
chr1:2374860-2375349	12.0494	0.050645	0.274542	0.184471	0.853644	0.999963
chr1:2390642-2392713	38.756	-0.0842359	0.275625	-0.305618	0.759896	0.999963
chr1:2411844-2413822	34.0325	0.180621	0.270844	0.666882	0.504848	0.999963
chr1:2431898-2433472	17.8738	0.150955	0.267421	0.564483	0.572425	0.999963
chr1:2446320-2447170	12.0656	-0.021811	0.26017	-0.0838337	0.933189	0.999963
chr1:2452016-2452794	11.6743	0.179317	0.256157	0.700028	0.48391	0.999963
chr1:2525725-2531901	126.041	0.138382	0.275595	0.50212	0.615583	0.999963
chr1:2540113-2540687	7.83005	0.244234	0.240673	1.01479	0.310204	0.999963
chr1:2542717-2546081	64.9238	0.127425	0.275848	0.461938	0.644126	0.999963
chr1:2546432-2547743	15.977	0.192658	0.261087	0.737906	0.460572	0.999963
chr1:2548230-2549656	16.5309	-0.0208632	0.262175	-0.0795773	0.936573	0.999963
chr1:2584929-2587550	48.0721	0.183513	0.275895	0.665155	0.505951	0.999963
chr1:2642257-2643947	31.5022	0.264916	0.270453	0.979528	0.327319	0.999963
chr1:3012075-3012393	9.06976	-0.156879	0.266715	-0.588191	0.556404	0.999963
chr1:3067503-3069245	18.4963	0.281927	0.267446	1.05415	0.291816	0.999963
chr1:3069895-3070228	6.04379	-0.0982063	0.221702	-0.442966	0.65779	0.999963
chr1:3070632-3075756	83.4224	0.0559228	0.275702	0.202838	0.839262	0.999963
chr1:3076362-3077317	11.8804	0.467364	0.26656	1.75331	0.079548	0.999963
chr1:3078983-3081016	40.0497	-0.0362353	0.275517	-0.131518	0.895366	0.999963
chr1:3103278-3106494	45.3229	0.136444	0.275935	0.494481	0.620967	0.999963
chr1:3111245-3112600	25.3306	0.132646	0.27604	0.480531	0.63085	0.999963
chr1:3119374-3120291	18.0978	0.312196	0.272909	1.14396	0.252641	0.999963
chr1:3120482-3123016	41.1226	0.20963	0.272822	0.768377	0.442263	0.999963
chr1:3124517-3126212	27.0153	0.101016	0.276046	0.365938	0.714411	0.999963
chr1:3126298-3127554	21.2088	-0.00688063	0.27579	-0.0249489	0.980096	0.999963
chr1:3155107-3156031	15.7911	0.104996	0.27552	0.381083	0.703142	0.999963
chr1:3159638-3161182	21.9827	0.0919495	0.275241	0.334069	0.738327	0.999963
chr1:3166034-3167152	16.6234	-0.0750619	0.272088	-0.275874	0.782645	0.999963
chr1:3169694-3171709	33.7008	0.14601	0.275181	0.530596	0.595699	0.999963
chr1:3172632-3174002	28.4686	0.253819	0.275745	0.920485	0.357319	0.999963
chr1:3185919-3187060	13.568	0.232105	0.256273	0.905692	0.365099	0.999963
chr1:3190485-3191205	13.2317	0.246834	0.26308	0.938247	0.348117	0.999963
chr1:3198694-3199496	14.2675	0.0183883	0.271704	0.0676776	0.946042	0.999963
chr1:3211224-3213624	40.2107	0.23669	0.27589	0.857916	0.390939	0.999963
chr1:3215194-3218184	60.2508	0.209312	0.268796	0.778702	0.436155	0.999963
chr1:3218402-3220023	31.9303	0.248155	0.276004	0.899101	0.368599	0.999963
chr1:3226498-3227904	24.6274	0.0308221	0.273934	0.112517	0.910414	0.999963
chr1:3247037-3249085	35.5181	0.031867	0.270181	0.117947	0.90611	0.999963
chr1:3249530-3250754	20.0621	0.0976467	0.276011	0.353779	0.723505	0.999963
chr1:3258389-3259020	14.9207	0.320721	0.275856	1.16264	0.244977	0.999963
chr1:3274016-3275193	20.1497	-0.121369	0.275045	-0.441272	0.659016	0.999963
chr1:3315307-3315959	12.4061	-0.155312	0.272566	-0.569816	0.568803	0.999963
chr1:3351825-3353278	34.8613	-0.0256421	0.272835	-0.0939839	0.925122	0.999963
chr1:3366446-3366828	7.65966	-0.16579	0.253574	-0.653812	0.513233	0.999963
chr1:3368043-3369791	47.735	-0.011504	0.267607	-0.0429885	0.965711	0.999963
chr1:3424038-3425075	12.5537	0.171845	0.258997	0.663501	0.50701	0.999963
chr1:3437791-3439262	23.67	-0.0810606	0.272548	-0.297418	0.766147	0.999963
chr1:3441286-3442400	24.6752	0.0843521	0.274411	0.307393	0.758544	0.999963
chr1:3746730-3747956	23.348	0.464785	0.27593	1.68443	0.0920977	0.999963
chr1:3795734-3797797	71.8962	0.179177	0.264082	0.678487	0.497463	0.999963
chr1:3819351-3819978	15.589	-0.238026	0.271336	-0.877237	0.380358	0.999963
chr1:3820283-3821817	26.971	0.163773	0.275873	0.593655	0.552743	0.999963
chr1:3899294-3901909	71.9951	0.0715103	0.27605	0.259048	0.795598	0.999963
chr1:3902224-3903410	26.7607	-0.0474853	0.274321	-0.173101	0.862572	0.999963
chr1:3924429-3925653	17.4373	0.00715532	0.269463	0.026554	0.978815	0.999963
chr1:3997766-4000207	61.6245	0.281353	0.258307	1.08922	0.276057	0.999963
chr1:4069838-4070769	18.1278	-0.0190651	0.275977	-0.0690821	0.944924	0.999963
chr1:4081753-4084636	53.5502	0.193933	0.261821	0.740709	0.45887	0.999963
chr1:4144985-4146158	26.1187	0.150633	0.272179	0.553433	0.579967	0.999963
chr1:4146402-4148793	58.7308	0.0256948	0.269584	0.0953127	0.924066	0.999963
chr1:4212834-4213994	16.9636	0.123409	0.274856	0.448993	0.653436	0.999963
chr1:4253216-4255290	43.3667	-0.0566008	0.259226	-0.218345	0.82716	0.999963
chr1:4395926-4399769	126.371	0.0666228	0.239046	0.278703	0.780473	0.999963
chr1:4421017-4422918	60.8286	0.0838922	0.251325	0.333799	0.738531	0.999963
chr1:4446776-4448900	72.8236	0.179577	0.242174	0.741521	0.458377	0.999963
chr1:4449142-4450823	36.9268	0.188813	0.264278	0.714448	0.47495	0.999963
chr1:4483061-4487608	185.591	-0.058944	0.242386	-0.243182	0.807864	0.999963
chr1:4523048-4523896	23.3896	-0.0434355	0.274022	-0.158511	0.874054	0.999963
chr1:4527197-4528388	16.8006	0.122337	0.273682	0.447005	0.654872	0.999963
chr1:4529110-4530399	26.4241	0.346524	0.273382	1.26754	0.204961	0.999963
chr1:4567697-4568699	21.7366	0.144048	0.275989	0.521934	0.601716	0.999963
chr1:4570688-4572261	30.8049	0.34357	0.273128	1.25791	0.208424	0.999963
chr1:4611802-4612248	6.23469	0.0709744	0.229276	0.30956	0.756896	0.999963
chr1:4656077-4656631	10.635	0.341196	0.262923	1.2977	0.19439	0.999963
chr1:4684837-4685621	17.8493	0.104324	0.275747	0.378332	0.705184	0.999963
chr1:4699421-4699939	14.4684	0.294259	0.275509	1.06806	0.285495	0.999963
chr1:4708001-4711590	79.8305	0.07147	0.269279	0.265413	0.790691	0.999963
chr1:4868841-4869906	19.6694	0.314585	0.275832	1.1405	0.25408	0.999963
chr1:4914628-4915064	12.3758	0.031198	0.272624	0.114436	0.908892	0.999963
chr1:5028302-5030960	75.1654	-0.0018896	0.257502	-0.00733819	0.994145	0.999963
chr1:5098576-5099921	25.0127	-0.100026	0.272326	-0.367301	0.713395	0.999963
chr1:5129922-5130251	11.7388	0.106835	0.271001	0.394223	0.693416	0.999963
chr1:5260763-5262265	33.4387	-0.0407482	0.266825	-0.152715	0.878623	0.999963
chr1:5296816-5298502	32.0434	0.249144	0.273242	0.911809	0.361869	0.999963
chr1:5423345-5432338	258.69	-0.0414591	0.225135	-0.184152	0.853894	0.999963
chr1:5493496-5494510	18.3603	0.0725839	0.275856	0.263123	0.792456	0.999963
chr1:5520549-5523407	80.9182	0.0238923	0.237992	0.100391	0.920034	0.999963
chr1:5599763-5601376	45.1339	0.0831677	0.261503	0.318037	0.750457	0.999963
chr1:5744392-5745845	33.5628	0.0979486	0.271356	0.36096	0.718129	0.999963
chr1:5896001-5898110	60.5017	-0.0692129	0.250779	-0.275992	0.782554	0.999963
chr1:5938461-5939173	19.8456	-0.0349307	0.276014	-0.126554	0.899294	0.999963
chr1:5974049-5974653	10.2112	0.107901	0.263676	0.409218	0.68238	0.999963
chr1:5990902-5994026	71.1627	0.333519	0.275964	1.20856	0.226832	0.999963
chr1:6002586-6004935	56.9591	0.194511	0.27124	0.717116	0.473302	0.999963
chr1:6052571-6054026	25.3368	0.182846	0.274415	0.666311	0.505213	0.999963
chr1:6083862-6084528	11.504	-0.060277	0.272565	-0.221147	0.824978	0.999963
chr1:6162896-6165808	98.4035	-0.0137062	0.26844	-0.0510586	0.959279	0.999963
chr1:6198694-6200751	70.9913	0.0103652	0.260892	0.0397297	0.968309	0.999963
chr1:6234944-6235889	16.7633	0.0963538	0.275	0.350377	0.726056	0.999963
chr1:6260421-6262191	27.5339	0.287163	0.26927	1.06645	0.286221	0.999963
chr1:6270897-6271910	18.9505	0.0199772	0.276068	0.0723632	0.942313	0.999963
chr1:6274812-6277392	51.7124	0.198147	0.275838	0.718343	0.472546	0.999963
chr1:6334445-6335034	7.2936	0.222839	0.2491	0.894577	0.371013	0.999963
chr1:6335076-6339200	88.7704	0.118896	0.269705	0.440838	0.659331	0.999963
chr1:6391661-6394683	87.3045	0.13068	0.271224	0.481814	0.629938	0.999963
chr1:6553745-6555237	30.6961	0.262487	0.276069	0.950801	0.341705	0.999963
chr1:6578917-6580796	50.8825	0.155709	0.275889	0.56439	0.572489	0.999963
chr1:6600359-6602045	31.1745	0.321215	0.276068	1.16354	0.244612	0.999963
chr1:6602545-6602821	5.32252	-0.0383633	0.208121	-0.184332	0.853753	0.999963
chr1:6603077-6604684	48.1187	-0.301241	0.261308	-1.15282	0.248984	0.999963
chr1:6609305-6609724	9.98421	-0.0952212	0.269888	-0.352818	0.724225	0.999963
chr1:6612688-6613443	15.9055	0.259665	0.269057	0.965092	0.334499	0.999963
chr1:6613833-6614483	9.19364	0.2831	0.257978	1.09738	0.272476	0.999963
chr1:6624667-6626601	48.4058	0.0971222	0.274124	0.3543	0.723114	0.999963
chr1:6653579-6654719	21.052	0.0608793	0.274719	0.221606	0.824621	0.999963
chr1:6700311-6702468	50.6804	0.348923	0.275906	1.26464	0.205999	0.999963
chr1:6734048-6735850	62.7213	-0.170797	0.253817	-0.672915	0.501001	0.999963
chr1:6771781-6772863	28.5071	-0.0375023	0.268973	-0.139427	0.889112	0.999963
chr1:6783609-6784981	32.0055	0.0451831	0.269394	0.167722	0.866802	0.999963
chr1:6785882-6786824	15.9326	0.219433	0.266432	0.8236	0.410167	0.999963
chr1:6850385-6851417	14.7285	0.121734	0.275941	0.441158	0.659098	0.999963
chr1:6894234-6894933	19.0473	-0.0792359	0.276055	-0.28703	0.77409	0.999963
chr1:6911325-6912577	31.567	-0.0148396	0.270283	-0.0549037	0.956215	0.999963
chr1:6914577-6915521	26.7656	0.0404473	0.271368	0.14905	0.881515	0.999963
chr1:6948219-6949033	17.0636	0.0707671	0.276033	0.256371	0.797664	0.999963
chr1:6970343-6971287	15.1558	0.0218559	0.274286	0.0796828	0.93649	0.999963
chr1:6971540-6971932	6.63803	0.149831	0.247909	0.604379	0.545592	0.999963
chr1:6984772-6986592	44.8363	0.0150197	0.260184	0.0577272	0.953966	0.999963
chr1:7110126-7111358	22.5741	0.229052	0.276033	0.829796	0.406654	0.999963
chr1:7232511-7232993	10.2159	-0.218583	0.268862	-0.812992	0.416223	0.999963
chr1:7247592-7248821	37.287	0.0941355	0.267917	0.351361	0.725318	0.999963
chr1:7334348-7334770	9.1663	0.331369	0.260594	1.27159	0.203517	0.999963
chr1:7370294-7370720	12.5016	0.0755763	0.27422	0.275605	0.782852	0.999963
chr1:7373728-7374610	17.3178	-0.142395	0.275954	-0.516009	0.605848	0.999963
chr1:7379068-7380116	28.6689	-0.019486	0.270583	-0.0720148	0.94259	0.999963
chr1:7491490-7491871	10.0951	0.404727	0.269158	1.50368	0.132664	0.999963
chr1:7637840-7639004	30.4732	-0.0699983	0.270266	-0.258998	0.795637	0.999963
chr1:7640313-7641822	32.6594	0.379596	0.275791	1.37639	0.168701	0.999963
chr1:7646828-7647195	7.29036	0.0558259	0.128784	0.433486	0.664662	0.999963
chr1:7655687-7661694	222.749	-0.020427	0.255925	-0.0798167	0.936383	0.999963
chr1:7667297-7672677	345.285	-0.00119497	0.26862	-0.00444857	0.996451	0.999963
chr1:7679600-7682986	154.158	0.0884393	0.27343	0.323444	0.746359	0.999963
chr1:7694718-7696651	53.3309	0.288077	0.260333	1.10657	0.26848	0.999963
chr1:7701326-7703968	68.8894	0.391087	0.261081	1.49795	0.134146	0.999963
chr1:7705014-7707002	70.3232	-0.0930655	0.247064	-0.376686	0.706407	0.999963
chr1:7727583-7728227	13.2828	0.0925335	0.270552	0.342017	0.732338	0.999963
chr1:7749400-7749752	7.50554	-0.210662	0.257567	-0.817893	0.413418	0.999963
chr1:7751541-7754034	74.3378	-0.253744	0.243033	-1.04407	0.296451	0.999963
chr1:7769421-7772188	70.9515	0.141455	0.251133	0.563267	0.573253	0.999963
chr1:7886102-7886942	17.4906	0.142707	0.276044	0.516973	0.605175	0.999963
chr1:7960323-7962915	117.163	0.0114666	0.232746	0.0492665	0.960707	0.999963
chr1:8017149-8018192	25.5845	-0.0126268	0.271983	-0.046425	0.962972	0.999963
chr1:8025262-8027110	52.3848	0.380961	0.275284	1.38389	0.166393	0.999963
chr1:8169258-8169868	17.1714	-0.221493	0.275707	-0.803363	0.421765	0.999963
chr1:8317668-8318742	27.0175	0.361696	0.275705	1.31189	0.189556	0.999963
chr1:8369796-8371904	64.7579	-0.112239	0.259813	-0.431998	0.665743	0.999963
chr1:8373412-8374646	23.8368	0.0988401	0.27518	0.359183	0.719458	0.999963
chr1:8378058-8378492	8.44201	0.187311	0.256185	0.731155	0.464684	0.999963
chr1:8395878-8396667	16.0383	-0.208918	0.276068	-0.756761	0.449193	0.999963
chr1:8407809-8408161	9.10758	-0.0508741	0.261303	-0.194694	0.845632	0.999963
chr1:8408333-8410030	39.0232	-0.319961	0.262204	-1.22028	0.22236	0.999963
chr1:8410370-8410971	13.337	0.148729	0.274873	0.541082	0.588451	0.999963
chr1:8422694-8423665	20.8283	0.173961	0.275673	0.631042	0.528013	0.999963
chr1:8424006-8425377	34.2301	-0.0899713	0.27313	-0.329408	0.741847	0.999963
chr1:8438369-8439464	22.5984	0.214765	0.274982	0.781016	0.434793	0.999963
chr1:8457884-8458670	18.6438	-0.120989	0.275639	-0.438941	0.660704	0.999963
chr1:8459264-8462230	119.447	-0.396047	0.234105	-1.69175	0.0906941	0.999963
chr1:8462324-8464242	59.9992	-0.359084	0.252171	-1.42397	0.154455	0.999963
chr1:8474168-8474823	16.4226	0.0102515	0.27601	0.0371419	0.970372	0.999963
chr1:8503402-8503785	8.44986	0.0278589	0.264539	0.105311	0.916129	0.999963
chr1:8509704-8510966	25.2404	0.092088	0.273935	0.336167	0.736745	0.999963
chr1:8516636-8518955	64.5987	0.0945626	0.249283	0.379338	0.704437	0.999963
chr1:8524333-8527439	111.222	0.0937303	0.229257	0.408843	0.682655	0.999963
chr1:8560603-8561060	10.6139	-0.0256073	0.271319	-0.0943806	0.924807	0.999963
chr1:8570825-8572050	28.6056	0.191076	0.273185	0.699438	0.484278	0.999963
chr1:8577545-8579604	64.214	-0.0657876	0.245388	-0.268097	0.788625	0.999963
chr1:8591432-8591937	8.43213	-0.0415251	0.257635	-0.161178	0.871953	0.999963
chr1:8597127-8598293	23.1695	-0.00294387	0.274881	-0.0107096	0.991455	0.999963
chr1:8599009-8599918	20.1304	-0.152344	0.275212	-0.553551	0.579886	0.999963
chr1:8621088-8622796	40.5965	-0.118715	0.263592	-0.450373	0.652442	0.999963
chr1:8628113-8633445	195.562	-0.0728536	0.220283	-0.330728	0.74085	0.999963
chr1:8635043-8635923	21.4524	-0.216794	0.275146	-0.787924	0.430741	0.999963
chr1:8640307-8642254	57.9565	-0.17058	0.26342	-0.647559	0.51727	0.999963
chr1:8642871-8643471	11.8925	-0.0130875	0.269619	-0.0485408	0.961285	0.999963
chr1:8648740-8649370	13.3833	0.111397	0.273512	0.407282	0.683801	0.999963
chr1:8651368-8651710	7.28201	-0.117883	0.254427	-0.463327	0.64313	0.999963
chr1:8660224-8661240	21.0087	-0.0351888	0.275162	-0.127884	0.898241	0.999963
chr1:8666344-8666898	10.9308	-0.278636	0.272638	-1.022	0.306781	0.999963
chr1:8668173-8668652	12.3088	0.224881	0.273261	0.822953	0.410535	0.999963
chr1:8672271-8672997	11.5083	-0.231957	0.269439	-0.860887	0.3893	0.999963
chr1:8674129-8675682	30.3924	-0.0568522	0.268517	-0.211727	0.83232	0.999963
chr1:8675722-8677084	23.8902	-0.194635	0.275995	-0.70521	0.480679	0.999963
chr1:8677712-8682156	162.432	0.0946687	0.226236	0.418452	0.675617	0.999963
chr1:8697948-8708186	614.805	-0.126888	0.212531	-0.597032	0.550486	0.999963
chr1:8709362-8710239	20.3529	0.00689867	0.275481	0.0250423	0.980021	0.999963
chr1:8710879-8714011	229.247	-0.182482	0.226996	-0.803902	0.421454	0.999963
chr1:8714249-8714865	11.381	-0.273612	0.273036	-1.00211	0.316291	0.999963
chr1:8716852-8718465	31.3897	0.0813458	0.273595	0.297322	0.766221	0.999963
chr1:8718568-8719573	21.1639	0.268158	0.275539	0.973212	0.330448	0.999963
chr1:8728366-8728789	10.0425	-0.221828	0.269012	-0.824602	0.409597	0.999963
chr1:8733319-8736205	69.296	-0.186785	0.246164	-0.758782	0.447983	0.999963
chr1:8736612-8737606	19.97	0.289885	0.275831	1.05095	0.293281	0.999963
chr1:8748513-8749586	23.7403	-0.101863	0.27412	-0.371602	0.710189	0.999963
chr1:8750282-8751109	22.2228	0.345615	0.275922	1.25258	0.210359	0.999963
chr1:8751344-8756757	396.252	-0.185914	0.236113	-0.787394	0.431051	0.999963
chr1:8757020-8757797	18.292	0.0951439	0.275272	0.345637	0.729616	0.999963
chr1:8796422-8796991	15.409	0.122452	0.276046	0.443594	0.657336	0.999963
chr1:8797527-8797977	13.2331	-0.144563	0.275124	-0.525445	0.599274	0.999963
chr1:8813628-8819523	416.063	-0.294602	0.210461	-1.39979	0.161575	0.999963
chr1:8821749-8822799	22.3158	0.026888	0.274601	0.0979169	0.921998	0.999963
chr1:8829208-8830673	35.2491	0.15612	0.264396	0.590477	0.554871	0.999963
chr1:8848365-8848926	12.9627	-0.00378895	0.272603	-0.0138992	0.98891	0.999963
chr1:8877772-8881002	67.3418	0.00191696	0.267481	0.00716671	0.994282	0.999963
chr1:9234410-9235746	33.2015	0.365216	0.273149	1.33706	0.181203	0.999963
chr1:9347101-9347639	15.1619	0.121456	0.276008	0.440046	0.659904	0.999963
chr1:9428173-9429841	62.895	0.213877	0.255502	0.837086	0.402544	0.999963
chr1:9444107-9445569	31.1089	0.238225	0.271137	0.878616	0.379609	0.999963
chr1:9538315-9540683	58.0091	0.282188	0.2674	1.0553	0.291287	0.999963
chr1:9588203-9588546	11.6911	-0.0443403	0.273127	-0.162343	0.871036	0.999963
chr1:9589202-9589861	10.8981	0.248246	0.253152	0.98062	0.32678	0.999963
chr1:9593727-9594067	5.1788	0.138933	0.223397	0.621909	0.534001	0.999963
chr1:9822139-9823912	37.0204	0.300735	0.266432	1.12875	0.259004	0.999963
chr1:9824240-9824800	11.9492	0.175925	0.2617	0.672239	0.501432	0.999963
chr1:9838065-9839717	22.292	0.114766	0.276056	0.415733	0.677605	0.999963
chr1:9852177-9852554	8.0391	0.0123802	0.243498	0.0508432	0.95945	0.999963
chr1:9874505-9875739	23.4888	0.482214	0.274162	1.75887	0.0786001	0.999963
chr1:9909292-9909973	13.1553	0.174712	0.267374	0.653437	0.513475	0.999963
chr1:9910647-9911742	42.1279	-0.0267033	0.269074	-0.0992413	0.920947	0.999963
chr1:9914650-9915237	16.9998	-0.0333235	0.276045	-0.120718	0.903915	0.999963
chr1:9916351-9917297	19.118	-0.172813	0.275631	-0.626971	0.530678	0.999963
chr1:9921161-9923830	64.4548	0.130509	0.252708	0.516441	0.605546	0.999963
chr1:9942209-9944033	70.1498	0.00761785	0.245889	0.0309808	0.975285	0.999963
chr1:9949716-9950363	15.7681	0.226304	0.276017	0.819891	0.412278	0.999963
chr1:10029136-10029984	15.7055	0.101004	0.275417	0.366732	0.713819	0.999963
chr1:10032085-10032699	26.7243	-0.263742	0.273928	-0.962813	0.335641	0.999963
chr1:10033007-10034783	80.1975	0.0447443	0.245239	0.182452	0.855228	0.999963
chr1:10127265-10128655	32.9545	-0.0316054	0.268199	-0.117843	0.906192	0.999963
chr1:10148957-10149653	14.2714	0.00620773	0.269577	0.0230277	0.981628	0.999963
chr1:10178145-10180696	111.502	-0.327576	0.234032	-1.3997	0.161602	0.999963
chr1:10208707-10214024	255.098	-0.086151	0.231938	-0.37144	0.71031	0.999963
chr1:10268021-10269256	20.1133	-0.255196	0.275077	-0.927726	0.35355	0.999963
chr1:10288523-10289481	18.8708	-0.0428945	0.275409	-0.155748	0.876231	0.999963
chr1:10292042-10292884	19.9691	-0.211483	0.275986	-0.766279	0.44351	0.999963
chr1:10293727-10298887	184.613	-0.379332	0.225818	-1.67982	0.092993	0.999963
chr1:10299143-10300048	19.0506	-0.150105	0.275964	-0.54393	0.58649	0.999963
chr1:10337318-10340459	68.7323	-0.0790494	0.247786	-0.319022	0.74971	0.999963
chr1:10387052-10388857	40.8233	-0.30001	0.262003	-1.14506	0.252184	0.999963
chr1:10398259-10398747	12.633	0.229324	0.271525	0.844579	0.398346	0.999963
chr1:10399038-10400488	35.9453	0.197697	0.275913	0.716518	0.473672	0.999963
chr1:10429978-10431575	41.5267	0.0992081	0.273481	0.36276	0.716784	0.999963
chr1:10450909-10451417	13.2116	0.088348	0.273724	0.322763	0.746875	0.999963
chr1:10455804-10459163	89.7664	-0.0597182	0.241626	-0.247152	0.804791	0.999963
chr1:10471967-10472394	7.69685	0.164143	0.249521	0.657834	0.510645	0.999963
chr1:10474464-10475949	33.7264	0.149097	0.275173	0.541831	0.587935	0.999963
chr1:10506482-10507538	34.6112	-0.034889	0.264699	-0.131806	0.895138	0.999963
chr1:10649323-10651127	24.7896	0.261401	0.276044	0.946955	0.343662	0.999963
chr1:10734312-10735841	38.8897	-0.147879	0.26588	-0.556187	0.578083	0.999963
chr1:10738272-10738917	11.3392	0.218192	0.270608	0.806304	0.420067	0.999963
chr1:10834773-10835682	10.5822	0.00597476	0.257695	0.0231854	0.981502	0.999963
chr1:10968023-10968917	23.3396	0.368432	0.272424	1.35242	0.176241	0.999963
chr1:11011845-11013720	87.2831	-0.0512122	0.265415	-0.192952	0.846997	0.999963
chr1:11059193-11059857	12.4336	0.211601	0.255836	0.827096	0.408183	0.999963
chr1:11060200-11061758	45.0141	0.00759712	0.268719	0.0282716	0.977446	0.999963
chr1:11098663-11100528	70.6825	0.285584	0.265382	1.07613	0.281871	0.999963
chr1:11173161-11174131	18.5984	0.0250339	0.275913	0.090731	0.927706	0.999963
chr1:11174309-11181779	242.858	0.033022	0.22469	0.146967	0.883158	0.999963
chr1:11182783-11183398	13.2097	-0.00102777	0.273374	-0.00375957	0.997	0.999963
chr1:11186368-11189033	64.3364	0.314403	0.249576	1.25975	0.20776	0.999963
chr1:11198327-11198804	11.1456	0.222534	0.271863	0.818552	0.413042	0.999963
chr1:11214569-11216272	42.191	-0.124527	0.261097	-0.476936	0.633408	0.999963
chr1:11242033-11242745	15.3639	0.119032	0.275075	0.432725	0.665214	0.999963
chr1:11261548-11263288	63.5925	0.00984931	0.250283	0.0393526	0.968609	0.999963
chr1:11272372-11272887	11.4153	0.251374	0.268689	0.935557	0.349501	0.999963
chr1:11273197-11274267	31.0387	0.264691	0.275939	0.959239	0.337439	0.999963
chr1:11286159-11287480	24.1991	0.0223818	0.27528	0.0813054	0.935199	0.999963
chr1:11331312-11331824	13.0874	0.332176	0.267615	1.24125	0.214515	0.999963
chr1:11337489-11341433	155.178	-0.0486042	0.25358	-0.191672	0.847999	0.999963
chr1:11342763-11342986	6.71431	0.184728	0.25066	0.736967	0.461143	0.999963
chr1:11344542-11345452	17.0493	0.220074	0.275909	0.797632	0.425084	0.999963
chr1:11345764-11346852	19.5605	0.21435	0.275787	0.77723	0.437023	0.999963
chr1:11353108-11358070	155.905	-0.159491	0.252007	-0.632882	0.52681	0.999963
chr1:11358785-11359458	10.4523	0.131086	0.260616	0.502986	0.614974	0.999963
chr1:11374742-11375863	17.8072	0.199748	0.273793	0.729559	0.46566	0.999963
chr1:11390881-11392449	35.1827	-0.0735005	0.265582	-0.276752	0.78197	0.999963
chr1:11411333-11412046	16.0224	0.0668997	0.276037	0.242358	0.808503	0.999963
chr1:11412341-11418645	198.118	-0.135208	0.242543	-0.557459	0.577214	0.999963
chr1:11433773-11435782	38.4875	0.0557645	0.275884	0.202131	0.839815	0.999963
chr1:11438231-11439939	35.3429	-0.0562717	0.273282	-0.20591	0.836861	0.999963
chr1:11453864-11454598	12.1772	-0.0633838	0.260152	-0.243642	0.807508	0.999963
chr1:11458480-11459730	20.4712	0.234203	0.273054	0.857719	0.391048	0.999963
chr1:11461543-11462166	10.2112	-0.0412294	0.254889	-0.161754	0.871499	0.999963
chr1:11474632-11475742	29.4337	0.0921923	0.27003	0.341415	0.732791	0.999963
chr1:11476024-11476797	12.3814	0.167475	0.268101	0.62467	0.532187	0.999963
chr1:11477956-11480530	47.3909	0.145526	0.276014	0.527242	0.598026	0.999963
chr1:11495930-11496248	10.703	0.371587	0.269532	1.37864	0.168006	0.999963
chr1:11497670-11501234	109.705	-0.249928	0.247997	-1.00779	0.313557	0.999963
chr1:11563202-11564310	18.261	0.133609	0.274605	0.48655	0.626578	0.999963
chr1:11585272-11585930	13.0329	0.0849846	0.271515	0.313002	0.754279	0.999963
chr1:11634643-11635252	12.8997	0.37101	0.27428	1.35267	0.176162	0.999963
chr1:11642776-11644457	36.3895	0.228204	0.266367	0.856726	0.391597	0.999963
chr1:11664244-11664900	11.3198	0.349097	0.257561	1.3554	0.175291	0.999963
chr1:11680291-11683045	67.7637	0.239635	0.27044	0.886092	0.375568	0.999963
chr1:11689396-11692747	124.513	0.205157	0.267037	0.768273	0.442325	0.999963
chr1:11699865-11704270	138.823	-0.19994	0.257751	-0.775712	0.437919	0.999963
chr1:11705508-11706248	20.642	-0.0910795	0.275822	-0.330212	0.74124	0.999963
chr1:11803030-11807294	98.4736	0.118615	0.256293	0.462811	0.6435	0.999963
chr1:11807697-11808029	10.0554	-0.0465721	0.270034	-0.172467	0.86307	0.999963
chr1:11845146-11846319	22.6322	-0.0802159	0.275048	-0.291643	0.77056	0.999963
chr1:11847119-11848956	26.7802	-0.0146473	0.274946	-0.0532732	0.957514	0.999963
chr1:11860380-11861285	16.4443	0.00842349	0.275253	0.0306028	0.975586	0.999963
chr1:11907021-11910638	233.881	-0.296124	0.231536	-1.27895	0.200914	0.999963
chr1:11934060-11934911	18.0524	0.137522	0.267979	0.513184	0.607823	0.999963
chr1:11943439-11945100	23.8789	0.160661	0.275785	0.582557	0.560192	0.999963
chr1:11978994-11981481	83.9915	0.0488612	0.26944	0.181344	0.856098	0.999963
chr1:12019484-12020126	11.7306	0.285446	0.259194	1.10128	0.270773	0.999963
chr1:12230052-12231408	20.4928	0.209735	0.262146	0.800072	0.423669	0.999963
chr1:12278638-12280454	43.7899	0.224357	0.257017	0.872924	0.382704	0.999963
chr1:12299464-12304210	160.538	0.0810888	0.225971	0.358846	0.71971	0.999963
chr1:12335631-12337716	50.7315	-0.0901145	0.258759	-0.348257	0.727648	0.999963
chr1:12338276-12340459	44.6553	-0.274686	0.257972	-1.06479	0.286972	0.999963
chr1:12405682-12407346	41.3887	0.071274	0.258923	0.275271	0.783108	0.999963
chr1:12460633-12461953	22.9791	-0.0272785	0.275326	-0.0990769	0.921077	0.999963
chr1:12581704-12582074	9.0772	0.149655	0.265011	0.564712	0.57227	0.999963
chr1:12618011-12619499	22.3124	0.225936	0.275547	0.819954	0.412242	0.999963
chr1:13583375-13587060	116.124	-0.351654	0.245949	-1.42978	0.15278	0.999963
chr1:13699577-13701087	41.0383	0.342361	0.269914	1.26841	0.204652	0.999963
chr1:13748306-13749215	30.7976	0.0603568	0.269762	0.223741	0.822959	0.999963
chr1:13749652-13750869	32.2428	-0.0736276	0.266932	-0.27583	0.782679	0.999963
chr1:13772519-13773137	13.0366	-0.124547	0.273967	-0.454605	0.649394	0.999963
chr1:13926169-13927684	33.2764	0.105967	0.267187	0.396601	0.691662	0.999963
chr1:14015790-14018591	77.7118	0.0998471	0.245356	0.406948	0.684046	0.999963
chr1:14026341-14028594	62.1147	0.134406	0.251348	0.534742	0.592829	0.999963
chr1:14030753-14032239	39.3847	-0.0889568	0.261632	-0.340007	0.733851	0.999963
chr1:14180472-14182714	55.7467	0.126186	0.252055	0.500627	0.616633	0.999963
chr1:14365789-14366262	11.442	-0.220989	0.273086	-0.809229	0.418384	0.999963
chr1:14396612-14397075	8.73754	-0.0296599	0.26161	-0.113375	0.909734	0.999963
chr1:14404350-14405466	30.6321	-0.0384267	0.270885	-0.141856	0.887194	0.999963
chr1:14436718-14437616	17.2389	-0.160547	0.276062	-0.58156	0.560863	0.999963
chr1:14494644-14497885	117.998	-0.18133	0.246236	-0.736407	0.461483	0.999963
chr1:14506264-14508500	52.0525	0.0144933	0.254857	0.0568683	0.95465	0.999963
chr1:14511715-14512022	7.97261	-0.339259	0.26332	-1.28839	0.197609	0.999963
chr1:14539224-14540032	20.0089	0.232655	0.275966	0.843055	0.399198	0.999963
chr1:14546313-14546873	14.6105	-0.0155484	0.273988	-0.0567484	0.954746	0.999963
chr1:14598309-14600819	59.0992	0.249217	0.272365	0.915012	0.360185	0.999963
chr1:14601665-14603377	36.5074	0.271666	0.263279	1.03186	0.30214	0.999963
chr1:14624889-14628979	136.293	-0.00801248	0.235655	-0.0340009	0.972876	0.999963
chr1:14667312-14669862	75.5898	0.0209522	0.248558	0.0842952	0.932822	0.999963
chr1:14670908-14673092	49.8712	-0.196383	0.258649	-0.759264	0.447695	0.999963
chr1:14779582-14780346	17.3467	0.117746	0.276069	0.426509	0.669737	0.999963
chr1:14875653-14876188	11.436	0.260999	0.27084	0.963668	0.335213	0.999963
chr1:14887894-14888538	14.4433	-0.0477589	0.275215	-0.173533	0.862232	0.999963
chr1:15206025-15207760	26.2253	0.218523	0.275434	0.793375	0.427559	0.999963
chr1:15303445-15305172	41.7845	0.00541785	0.263336	0.0205739	0.983586	0.999963
chr1:15378789-15382420	109.779	-0.0526247	0.242804	-0.216737	0.828413	0.999963
chr1:15383656-15387264	82.7384	-0.00732965	0.262998	-0.0278696	0.977766	0.999963
chr1:15408238-15410814	61.1408	0.315312	0.271061	1.16325	0.244728	0.999963
chr1:15523241-15524840	58.3915	0.187818	0.260986	0.719646	0.471743	0.999963
chr1:15525260-15527755	90.2775	0.0287312	0.2448	0.117366	0.90657	0.999963
chr1:15603058-15604419	29.7775	0.0976335	0.275667	0.354172	0.72321	0.999963
chr1:15616350-15618916	69.9859	-0.0794134	0.252243	-0.314828	0.752892	0.999963
chr1:15670594-15673079	60.0878	-0.0100472	0.251773	-0.0399059	0.968168	0.999963
chr1:15683668-15684268	20.2257	0.117841	0.26758	0.440397	0.65965	0.999963
chr1:15684531-15686232	48.0223	0.353028	0.25907	1.36267	0.172985	0.999963
chr1:15697166-15698436	33.3058	0.00662484	0.270375	0.0245024	0.980452	0.999963
chr1:15757896-15758508	13.6371	0.36976	0.262639	1.40787	0.159171	0.999963
chr1:15758884-15759395	8.82564	0.22657	0.245185	0.924078	0.355446	0.999963
chr1:15832747-15837029	412.215	-0.344872	0.229749	-1.50108	0.133334	0.999963
chr1:15842889-15845800	138.177	-0.292628	0.224249	-1.30492	0.191919	0.999963
chr1:15846491-15847558	40.636	0.0396524	0.269677	0.147037	0.883103	0.999963
chr1:15847959-15853571	510.864	-0.288869	0.205022	-1.40896	0.158846	0.999963
chr1:15866870-15867415	12.5246	-0.17843	0.273063	-0.65344	0.513473	0.999963
chr1:15884146-15888210	227.047	-0.454862	0.215498	-2.11075	0.0347941	0.999963
chr1:15974813-15976120	42.5495	0.153174	0.273847	0.559344	0.575927	0.999963
chr1:16174637-16176510	32.1496	-0.173394	0.274309	-0.632112	0.527314	0.999963
chr1:16190255-16191130	19.42	-0.0120781	0.275968	-0.0437662	0.965091	0.999963
chr1:16206139-16206435	6.34095	-0.0176245	0.131932	-0.133588	0.893728	0.999963
chr1:16236276-16238013	60.8057	0.259448	0.257196	1.00876	0.313092	0.999963
chr1:16247512-16250008	61.5584	-0.307713	0.249929	-1.2312	0.218247	0.999963
chr1:16299397-16302210	91.8084	-0.0616289	0.234547	-0.262757	0.792738	0.999963
chr1:16349181-16353114	189.656	-0.0362293	0.227597	-0.159182	0.873526	0.999963
chr1:16362986-16363475	19.8175	0.155721	0.275122	0.566008	0.571388	0.999963
chr1:16366419-16368299	59.4091	0.11057	0.269713	0.409953	0.68184	0.999963
chr1:16374027-16374777	14.0812	0.107766	0.274094	0.393173	0.694191	0.999963
chr1:16440166-16441837	40.7651	0.331523	0.274724	1.20675	0.227529	0.999963
chr1:16492654-16493834	28.0287	0.15939	0.27319	0.583442	0.559595	0.999963
chr1:16498206-16500515	70.6249	0.267898	0.273235	0.980468	0.326855	0.999963
chr1:16507999-16508591	16.8522	0.213015	0.276041	0.77168	0.440304	0.999963
chr1:16509006-16509621	20.5417	0.190755	0.276045	0.69103	0.489547	0.999963
chr1:16509952-16510580	12.3861	0.368027	0.27343	1.34596	0.178315	0.999963
chr1:16511480-16516121	272.286	-0.0793911	0.213542	-0.371783	0.710055	0.999963
chr1:16516737-16517611	14.8983	-0.0319298	0.275608	-0.115852	0.90777	0.999963
chr1:16519096-16519990	29.7736	-0.0771439	0.269856	-0.28587	0.774978	0.999963
chr1:16540307-16541534	38.8568	-0.118796	0.26467	-0.448844	0.653544	0.999963
chr1:16543772-16545173	27.7575	0.538832	0.271186	1.98695	0.046928	0.999963
chr1:16546037-16546695	22.9725	0.125161	0.273795	0.457135	0.647574	0.999963
chr1:16565350-16565692	12.9257	0.149821	0.274107	0.546577	0.584669	0.999963
chr1:16596966-16597168	7.36959	0.164104	0.25327	0.647941	0.517023	0.999963
chr1:16604916-16606777	48.2911	0.532039	0.260257	2.04428	0.0409257	0.999963
chr1:16609012-16619204	423.176	0.219327	0.209356	1.04763	0.294811	0.999963
chr1:16620698-16622014	22.4817	-0.0717008	0.275456	-0.260299	0.794633	0.999963
chr1:16622744-16625657	41.7951	0.363647	0.274382	1.32533	0.18506	0.999963
chr1:16628440-16629928	22.8919	0.266829	0.275795	0.967491	0.333299	0.999963
chr1:16632826-16633253	6.48414	0.0521581	0.233015	0.223841	0.822881	0.999963
chr1:16633577-16637321	84.119	0.15805	0.244064	0.647578	0.517258	0.999963
chr1:16639061-16640539	43.0975	0.495135	0.261421	1.89401	0.0582233	0.999963
chr1:16640933-16642548	48.6353	0.195856	0.254304	0.770166	0.441201	0.999963
chr1:16642709-16645841	212.481	0.170624	0.265061	0.643715	0.51976	0.999963
chr1:16650346-16651210	26.4745	0.378658	0.271588	1.39424	0.163246	0.999963
chr1:16651380-16652413	31.1005	0.156309	0.268851	0.581394	0.560975	0.999963
chr1:16673915-16676184	69.5948	-0.112824	0.248302	-0.454384	0.649552	0.999963
chr1:16725455-16726174	23.117	0.293053	0.27398	1.06961	0.284794	0.999963
chr1:16726530-16727241	24.9833	0.380981	0.275554	1.3826	0.166788	0.999963
chr1:16728190-16729045	18.3026	0.153783	0.275925	0.557336	0.577298	0.999963
chr1:16732529-16733508	49.4513	-0.196173	0.25486	-0.769731	0.441459	0.999963
chr1:16748415-16749030	12.5789	-0.133059	0.267949	-0.496585	0.619481	0.999963
chr1:16795799-16798262	94.1499	0.0556402	0.246685	0.225552	0.82155	0.999963
chr1:16866619-16866856	9.47549	-0.143056	0.268463	-0.53287	0.594123	0.999963
chr1:16867481-16868054	15.9914	0.0524349	0.276055	0.189944	0.849353	0.999963
chr1:16868849-16869310	9.48972	0.206291	0.260647	0.791456	0.428678	0.999963
chr1:16890682-16891159	14.1079	0.117845	0.275111	0.428355	0.668393	0.999963
chr1:16894460-16898669	212.444	-0.164381	0.232133	-0.708134	0.478862	0.999963
chr1:16902720-16907537	291.963	-0.145395	0.224711	-0.647031	0.517612	0.999963
chr1:16913218-16915082	38.9642	0.443328	0.275847	1.60715	0.108022	0.999963
chr1:17011324-17011743	8.85845	0.0710192	0.243338	0.291854	0.770398	0.999963
chr1:17012113-17012767	13.5366	-0.193348	0.271711	-0.711593	0.476717	0.999963
chr1:17045806-17046706	25.0506	-0.230135	0.273791	-0.840549	0.400601	0.999963
chr1:17052719-17054734	65.4934	0.0838871	0.263759	0.318045	0.750451	0.999963
chr1:17059508-17062769	167.708	-0.103489	0.221313	-0.467614	0.640061	0.999963
chr1:17191944-17192842	16.445	0.230871	0.275506	0.837988	0.402037	0.999963
chr1:17436284-17436926	11.766	0.226673	0.271271	0.835595	0.403383	0.999963
chr1:17437074-17437605	11.9829	-0.351995	0.272114	-1.29356	0.195817	0.999963
chr1:17438335-17440341	59.2162	-0.0813554	0.269913	-0.301413	0.763099	0.999963
chr1:17538036-17541256	82.0055	0.0897753	0.274187	0.327424	0.743347	0.999963
chr1:17545794-17548487	67.8905	-0.289396	0.24577	-1.17751	0.238994	0.999963
chr1:17564525-17566004	18.833	0.0562803	0.27424	0.205222	0.837398	0.999963
chr1:17644020-17646399	28.7217	-0.166681	0.275319	-0.605408	0.544908	0.999963
chr1:17670867-17673475	55.2367	0.0713127	0.271906	0.262269	0.793114	0.999963
chr1:17681574-17683079	30.7817	-0.297245	0.27396	-1.08499	0.277924	0.999963
chr1:17702974-17703527	12.5735	0.223377	0.273923	0.815475	0.4148	0.999963
chr1:17745398-17745938	11.0982	-0.224958	0.272221	-0.826378	0.40859	0.999963
chr1:17874124-17875794	46.9472	0.196774	0.270595	0.72719	0.467109	0.999963
chr1:17924872-17925836	19.4059	0.171006	0.27601	0.619567	0.535543	0.999963
chr1:17948976-17950205	16.3933	0.218526	0.264601	0.825869	0.408878	0.999963
chr1:17957744-17958689	18.5845	-0.161179	0.275984	-0.584014	0.559211	0.999963
chr1:17962347-17964079	42.0379	-0.106651	0.260897	-0.408787	0.682696	0.999963
chr1:17971524-17972684	34.2806	0.071013	0.266938	0.266029	0.790217	0.999963
chr1:18028362-18029090	15.1147	0.237641	0.275619	0.862208	0.388573	0.999963
chr1:18064155-18064532	7.70827	0.294797	0.253052	1.16497	0.244032	0.999963
chr1:18263297-18263984	16.5633	0.210576	0.275308	0.764872	0.444348	0.999963
chr1:18384353-18385300	13.8454	0.111217	0.267709	0.415441	0.677819	0.999963
chr1:18401409-18404261	56.459	0.0982403	0.25931	0.378852	0.704798	0.999963
chr1:18557828-18558316	16.0734	0.198231	0.274538	0.722055	0.470261	0.999963
chr1:18643420-18643857	9.31896	0.363714	0.25305	1.43732	0.150626	0.999963
chr1:18657127-18658122	29.1678	-0.197812	0.271226	-0.729327	0.465801	0.999963
chr1:18723551-18724306	13.9278	0.0677049	0.268715	0.251958	0.801073	0.999963
chr1:18902149-18903254	34.1232	-0.108397	0.27341	-0.396462	0.691764	0.999963
chr1:18944563-18946276	25.7765	-0.0264586	0.275973	-0.0958736	0.923621	0.999963
chr1:18949575-18950600	19.9846	-0.176269	0.276042	-0.638559	0.52311	0.999963
chr1:18955616-18956615	10.6193	0.0990278	0.133656	0.740916	0.458745	0.999963
chr1:19173271-19175753	81.0467	0.0463048	0.242927	0.190612	0.84883	0.999963
chr1:19196360-19197864	39.6864	0.30229	0.262335	1.15231	0.249194	0.999963
chr1:19198194-19199115	20.1992	0.310817	0.275181	1.1295	0.258687	0.999963
chr1:19200796-19201655	16.2294	-0.0146849	0.275102	-0.0533798	0.957429	0.999963
chr1:19208593-19212175	158.683	0.177582	0.230108	0.771733	0.440272	0.999963
chr1:19250716-19252571	70.7257	0.160346	0.266753	0.601103	0.547771	0.999963
chr1:19311072-19313375	45.4095	0.207613	0.275376	0.753925	0.450894	0.999963
chr1:19379510-19379891	10.2137	-0.0979188	0.267637	-0.365864	0.714467	0.999963
chr1:19404556-19407844	80.7444	-0.00324803	0.25749	-0.0126142	0.989936	0.999963
chr1:19442542-19443601	19.1429	-0.144245	0.275964	-0.522695	0.601186	0.999963
chr1:19471698-19472116	10.1829	0.210567	0.269983	0.779926	0.435434	0.999963
chr1:19481769-19482951	21.507	-0.0729211	0.27523	-0.264946	0.791051	0.999963
chr1:19484001-19486826	68.9259	0.231408	0.272959	0.847778	0.396562	0.999963
chr1:19595041-19598348	172.985	0.072832	0.237439	0.306741	0.759041	0.999963
chr1:19644687-19645659	16.843	0.394578	0.268781	1.46803	0.142095	0.999963
chr1:19704132-19706973	58.706	0.0443191	0.253155	0.175067	0.861027	0.999963
chr1:19707057-19709964	70.281	0.0701923	0.250113	0.280643	0.778984	0.999963
chr1:19734647-19737414	66.4536	0.010539	0.260656	0.0404327	0.967748	0.999963
chr1:19877667-19879016	25.5102	0.0358532	0.275212	0.130275	0.896349	0.999963
chr1:19881591-19883571	88.4919	0.203639	0.256894	0.792696	0.427955	0.999963
chr1:19938363-19938775	10.9363	0.22665	0.26863	0.843728	0.398821	0.999963
chr1:19939239-19943559	221.859	-0.366679	0.22525	-1.62787	0.103551	0.999963
chr1:19973476-19974286	19.1966	0.0275413	0.276066	0.0997634	0.920532	0.999963
chr1:20057850-20058910	26.9299	-0.0832028	0.272695	-0.305113	0.76028	0.999963
chr1:20168126-20168870	11.66	0.138171	0.268129	0.515315	0.606333	0.999963
chr1:20219265-20220732	46.818	-0.0087834	0.261235	-0.0336226	0.973178	0.999963
chr1:20223431-20225310	45.3404	-0.0364743	0.261651	-0.139401	0.889134	0.999963
chr1:20232245-20236638	140.108	-0.221815	0.22674	-0.97828	0.327936	0.999963
chr1:20240766-20243009	66.3599	0.14581	0.246935	0.590477	0.554871	0.999963
chr1:20271087-20273644	70.75	0.27843	0.249999	1.11372	0.265397	0.999963
chr1:20325225-20326768	35.6056	-0.0499187	0.263076	-0.18975	0.849505	0.999963
chr1:20328681-20329304	19.7818	-0.20214	0.276069	-0.732211	0.46404	0.999963
chr1:20339023-20341141	38.5655	-0.18992	0.265657	-0.714906	0.474667	0.999963
chr1:20341494-20342069	17.5376	-0.00276346	0.276069	-0.01001	0.992013	0.999963
chr1:20366814-20367553	17.3346	0.196492	0.273638	0.71807	0.472714	0.999963
chr1:20368543-20368934	11.2749	-0.0400585	0.273243	-0.146604	0.883445	0.999963
chr1:20370800-20371231	7.21762	0.0866914	0.249881	0.34693	0.728644	0.999963
chr1:20373028-20373819	14.577	0.190036	0.275265	0.690375	0.489958	0.999963
chr1:20373925-20376361	41.2462	0.326255	0.270171	1.20759	0.227205	0.999963
chr1:20382930-20383551	11.9007	0.17127	0.270744	0.632591	0.527	0.999963
chr1:20383888-20388177	193.798	0.0610338	0.247658	0.246444	0.805339	0.999963
chr1:20405991-20406942	16.5242	0.367732	0.27587	1.33299	0.182535	0.999963
chr1:20408674-20413482	181.101	0.0606469	0.238663	0.254111	0.79941	0.999963
chr1:20431354-20431705	8.50573	0.4146	0.256051	1.61921	0.105402	0.999963
chr1:20447236-20450453	91.3498	0.239877	0.248479	0.965381	0.334354	0.999963
chr1:20470459-20471196	14.7852	-0.395895	0.275724	-1.43584	0.151049	0.999963
chr1:20482551-20487863	173.363	0.173677	0.26751	0.649236	0.516186	0.999963
chr1:20494121-20494610	10.0805	0.148826	0.261738	0.568604	0.569625	0.999963
chr1:20506899-20508818	73.4908	0.19232	0.262357	0.733045	0.463531	0.999963
chr1:20529295-20532734	190.622	0.0861832	0.233799	0.368621	0.71241	0.999963
chr1:20551328-20553426	37.7346	0.229777	0.275192	0.834969	0.403735	0.999963
chr1:20633611-20634744	35.6478	0.0118861	0.275826	0.0430925	0.965628	0.999963
chr1:20660539-20662454	58.6333	0.11014	0.275133	0.400316	0.688924	0.999963
chr1:20695800-20697827	48.5077	0.310141	0.275121	1.12729	0.259621	0.999963
chr1:20704866-20705874	16.9074	0.0834685	0.27126	0.307707	0.758305	0.999963
chr1:20710126-20712562	53.9839	0.266958	0.267722	0.997144	0.318695	0.999963
chr1:20717537-20718558	13.9604	0.287295	0.259659	1.10643	0.26854	0.999963
chr1:20731830-20733118	17.2689	0.436784	0.273808	1.59522	0.110663	0.999963
chr1:20773342-20774047	11.5543	-0.114369	0.270537	-0.422747	0.67248	0.999963
chr1:20780950-20781702	15.9148	-0.172156	0.276059	-0.623618	0.532878	0.999963
chr1:20781898-20782273	7.12678	-0.0468416	0.256551	-0.182582	0.855126	0.999963
chr1:20785110-20788957	132.135	-0.0370177	0.251921	-0.146942	0.883178	0.999963
chr1:20883760-20884535	17.8918	-0.048728	0.274946	-0.177228	0.859329	0.999963
chr1:20899794-20900800	19.9523	-0.150853	0.276025	-0.546519	0.58471	0.999963
chr1:20905550-20906720	34.5957	-0.0706535	0.27331	-0.25851	0.796013	0.999963
chr1:20914454-20916090	33.4805	-0.0774507	0.269368	-0.287528	0.773708	0.999963
chr1:20949940-20950884	18.0092	-0.253603	0.27602	-0.918785	0.358208	0.999963
chr1:20951388-20951993	15.559	0.0577119	0.272934	0.21145	0.832536	0.999963
chr1:20976414-20977076	10.8621	-0.0756142	0.269589	-0.280479	0.77911	0.999963
chr1:20977401-20978652	31.3456	-0.0893764	0.27316	-0.327194	0.743521	0.999963
chr1:20993133-20994607	33.3355	0.0321188	0.271627	0.118246	0.905873	0.999963
chr1:21001791-21002130	8.67116	-0.129884	0.264633	-0.490809	0.623562	0.999963
chr1:21004870-21006815	49.4735	0.204753	0.262112	0.781166	0.434705	0.999963
chr1:21045532-21046503	22.1852	0.237589	0.276026	0.860748	0.389377	0.999963
chr1:21114874-21115501	14.2617	-0.117257	0.275691	-0.42532	0.670603	0.999963
chr1:21116869-21118786	104.616	-0.442048	0.237416	-1.86191	0.0626155	0.999963
chr1:21119140-21119725	11.4708	-0.0155635	0.25958	-0.0599565	0.95219	0.999963
chr1:21139968-21140374	12.9514	-0.0376752	0.273668	-0.137668	0.890503	0.999963
chr1:21147676-21153607	325.815	-0.168071	0.209458	-0.802407	0.422318	0.999963
chr1:21153887-21154790	20.6584	0.129715	0.275909	0.470139	0.638256	0.999963
chr1:21171332-21172337	17.7656	0.058376	0.275897	0.211586	0.83243	0.999963
chr1:21173895-21176222	77.7077	0.126556	0.247484	0.511373	0.60909	0.999963
chr1:21176607-21177502	29.4487	0.020238	0.272449	0.0742816	0.940786	0.999963
chr1:21192691-21194035	24.758	0.272454	0.274775	0.991552	0.321416	0.999963
chr1:21196869-21202389	239.406	-0.173758	0.227646	-0.763281	0.445296	0.999963
chr1:21262010-21263237	22.2523	0.363506	0.276026	1.31693	0.187863	0.999963
chr1:21267584-21268394	17.6812	0.138669	0.275886	0.502631	0.615223	0.999963
chr1:21344594-21346051	22.5514	0.186681	0.27238	0.68537	0.493111	0.999963
chr1:21397611-21398472	14.8197	0.136213	0.275294	0.49479	0.620748	0.999963
chr1:21439173-21440435	40.9342	0.0778916	0.268705	0.289878	0.77191	0.999963
chr1:21508824-21509205	6.76812	0.154396	0.226858	0.680585	0.496134	0.999963
chr1:21573595-21574182	10.0776	0.0861937	0.242639	0.355234	0.722414	0.999963
chr1:21574467-21575898	37.4455	0.232055	0.275164	0.843334	0.399042	0.999963
chr1:21581953-21583851	33.1961	0.241229	0.271549	0.888345	0.374355	0.999963
chr1:21589872-21591742	35.2718	-0.0770268	0.276011	-0.279072	0.78019	0.999963
chr1:21618488-21620227	26.909	0.0896678	0.268321	0.33418	0.738243	0.999963
chr1:21631208-21634684	110.549	0.149224	0.264999	0.563112	0.573359	0.999963
chr1:21651151-21651546	9.68196	0.0944183	0.25007	0.377568	0.705752	0.999963
chr1:21652699-21653504	10.5356	0.287213	0.262144	1.09563	0.273241	0.999963
chr1:21659156-21660149	20.9248	0.205704	0.273852	0.751151	0.452562	0.999963
chr1:21668430-21669411	14.1658	0.354166	0.261116	1.35636	0.174986	0.999963
chr1:21781824-21784200	93.502	0.056738	0.257817	0.220071	0.825816	0.999963
chr1:21937588-21938030	8.41851	-0.101957	0.253875	-0.401603	0.687976	0.999963
chr1:22023470-22026571	71.5316	0.139659	0.256898	0.543636	0.586692	0.999963
chr1:22052080-22054608	103.382	0.00969832	0.254872	0.0380517	0.969646	0.999963
chr1:22077286-22077659	9.98487	-0.110681	0.270805	-0.408713	0.68275	0.999963
chr1:22095331-22096128	20.2335	0.2185	0.275184	0.794012	0.427188	0.999963
chr1:22096578-22097414	21.3771	0.381835	0.27435	1.39178	0.163988	0.999963
chr1:22105071-22105925	19.2533	-0.0440722	0.275081	-0.160216	0.872711	0.999963
chr1:22106238-22106649	10.4973	0.322421	0.270076	1.19381	0.232551	0.999963
chr1:22141565-22142671	17.0829	0.369347	0.270778	1.36402	0.172562	0.999963
chr1:22184912-22185907	22.3415	0.343087	0.276002	1.24306	0.213847	0.999963
chr1:22320098-22321391	30.05	-0.0147276	0.273535	-0.0538419	0.957061	0.999963
chr1:22341607-22343405	49.2326	0.239038	0.274801	0.869858	0.384378	0.999963
chr1:22347729-22348337	10.0289	0.020994	0.262997	0.0798261	0.936376	0.999963
chr1:22349097-22353055	147.985	0.029916	0.250009	0.11966	0.904753	0.999963
chr1:22416766-22421836	161.961	0.22837	0.24239	0.942159	0.346111	0.999963
chr1:22450667-22453640	117.908	-0.0459528	0.245797	-0.186954	0.851697	0.999963
chr1:22456275-22457214	19.2221	0.146755	0.27569	0.53232	0.594504	0.999963
chr1:22500399-22503998	87.801	0.243605	0.243953	0.998574	0.318001	0.999963
chr1:22535867-22536934	21.0435	-0.0986965	0.275668	-0.358026	0.720324	0.999963
chr1:22547889-22548767	12.8435	0.323312	0.26752	1.20855	0.226834	0.999963
chr1:22554273-22554938	12.2247	0.299418	0.261637	1.1444	0.252456	0.999963
chr1:22614959-22615295	7.5164	0.25742	0.254942	1.00972	0.312629	0.999963
chr1:22672963-22674636	24.9299	0.0202754	0.275209	0.0736728	0.941271	0.999963
chr1:22684980-22685688	10.7147	0.000817538	0.266183	0.00307134	0.997549	0.999963
chr1:22709504-22710681	39.9956	0.0574737	0.276061	0.208192	0.835079	0.999963
chr1:22781813-22782450	15.7697	0.0639855	0.275871	0.23194	0.816585	0.999963
chr1:22791084-22791724	14.4827	0.16431	0.275421	0.596578	0.550789	0.999963
chr1:22799359-22802592	63.7679	-0.0768287	0.272889	-0.281538	0.778298	0.999963
chr1:22805450-22807470	27.7493	-0.0173171	0.275439	-0.0628708	0.949869	0.999963
chr1:22828391-22830739	61.911	-0.17311	0.264961	-0.653343	0.513535	0.999963
chr1:23018892-23021878	136.323	0.0242117	0.248882	0.097282	0.922502	0.999963
chr1:23116928-23117230	8.39139	-0.0516126	0.259255	-0.199081	0.8422	0.999963
chr1:23167071-23168078	32.3591	0.349542	0.274503	1.27337	0.202888	0.999963
chr1:23168461-23168762	9.05945	0.0782313	0.254387	0.307529	0.758441	0.999963
chr1:23177258-23178166	18.3888	0.304389	0.272546	1.11684	0.264065	0.999963
chr1:23227514-23228277	14.1327	-0.185966	0.275571	-0.674841	0.499777	0.999963
chr1:23260189-23260896	17.6334	0.0793175	0.276066	0.287314	0.773872	0.999963
chr1:23268444-23270375	37.2617	0.0406184	0.272309	0.149163	0.881425	0.999963
chr1:23282507-23284931	65.1646	-0.230707	0.257773	-0.895001	0.370787	0.999963
chr1:23308249-23310418	38.8487	-0.0845762	0.272071	-0.310861	0.755906	0.999963
chr1:23339996-23340616	13.7291	0.193008	0.275456	0.700687	0.483498	0.999963
chr1:23340963-23345595	216.025	-0.0679126	0.225712	-0.300882	0.763505	0.999963
chr1:23356297-23357944	39.695	-0.31384	0.261601	-1.19969	0.23026	0.999963
chr1:23366844-23371948	257.901	-0.00794714	0.244242	-0.032538	0.974043	0.999963
chr1:23483001-23484146	16.0666	0.177651	0.269375	0.659493	0.509579	0.999963
chr1:23531533-23532274	23.8051	0.171656	0.274399	0.625571	0.531597	0.999963
chr1:23539294-23539755	12.5005	0.30742	0.264845	1.16075	0.245742	0.999963
chr1:23554447-23554884	7.09097	0.186444	0.238396	0.782078	0.434169	0.999963
chr1:23559306-23559768	8.36859	0.234035	0.243217	0.962249	0.335925	0.999963
chr1:23568179-23569254	21.9349	0.179114	0.269615	0.664333	0.506477	0.999963
chr1:23597870-23598619	13.3793	0.0778986	0.273294	0.285036	0.775617	0.999963
chr1:23691738-23692910	56.2964	0.0589665	0.263466	0.22381	0.822905	0.999963
chr1:23742853-23744445	39.2569	0.302992	0.273398	1.10824	0.267757	0.999963
chr1:23758560-23759374	18.9478	-0.00157662	0.275866	-0.00571519	0.99544	0.999963
chr1:23759796-23760747	19.3809	0.157542	0.275596	0.571643	0.567564	0.999963
chr1:23777229-23779476	96.3046	0.0163065	0.254993	0.0639487	0.949011	0.999963
chr1:23790398-23791772	34.7766	0.064083	0.271064	0.236413	0.813112	0.999963
chr1:23799538-23801541	46.6392	0.321491	0.276057	1.16458	0.244188	0.999963
chr1:23824579-23826177	62.6604	0.0581396	0.260491	0.223192	0.823386	0.999963
chr1:23958202-23961655	173.16	-0.241109	0.227197	-1.06123	0.288583	0.999963
chr1:23961827-23962174	8.74616	0.200897	0.264412	0.759786	0.447382	0.999963
chr1:23978282-23981656	184.594	-0.178243	0.220089	-0.809867	0.418017	0.999963
chr1:24051034-24051885	16.568	-0.319518	0.276069	-1.15739	0.247115	0.999963
chr1:24150757-24152021	34.6119	0.0614534	0.265947	0.231074	0.817258	0.999963
chr1:24384111-24384825	13.5793	-0.0328391	0.272338	-0.120582	0.904022	0.999963
chr1:24467837-24470780	92.8568	-0.259619	0.243959	-1.06419	0.287242	0.999963
chr1:24481422-24482272	17.5874	-0.0825384	0.275978	-0.299076	0.764882	0.999963
chr1:24502212-24502681	9.38706	0.0136562	0.258775	0.0527724	0.957913	0.999963
chr1:24640845-24645291	202.239	-0.00587681	0.268037	-0.0219254	0.982507	0.999963
chr1:24745381-24747238	56.1417	-0.0819723	0.264372	-0.310065	0.756512	0.999963
chr1:24764803-24765607	19.641	-0.034732	0.275681	-0.125986	0.899743	0.999963
chr1:24801615-24804268	72.4637	-0.192512	0.247786	-0.776927	0.437202	0.999963
chr1:24804674-24805003	9.48929	-0.0765152	0.269313	-0.284112	0.776324	0.999963
chr1:24805130-24806485	28.674	-0.0395494	0.274943	-0.143846	0.885622	0.999963
chr1:24806685-24807363	14.5478	-0.0616378	0.275754	-0.223524	0.823127	0.999963
chr1:24837021-24837495	10.1022	-0.176972	0.261806	-0.675968	0.499061	0.999963
chr1:25048503-25048886	9.35019	0.137904	0.26541	0.51959	0.60335	0.999963
chr1:25231618-25233659	105.898	-0.130711	0.249824	-0.523215	0.600824	0.999963
chr1:25238960-25240809	66.8527	-0.0506301	0.257266	-0.1968	0.843984	0.999963
chr1:25246238-25248584	66.3218	0.20316	0.264701	0.767508	0.442779	0.999963
chr1:25255200-25255665	14.7521	0.0746996	0.274143	0.272484	0.78525	0.999963
chr1:25255815-25256444	13.5316	0.0564724	0.274389	0.205811	0.836938	0.999963
chr1:25337908-25339861	60.3974	-0.0215583	0.262529	-0.0821178	0.934553	0.999963
chr1:25429546-25432403	132.03	-0.0526332	0.245561	-0.214338	0.830283	0.999963
chr1:25445303-25446828	32.4138	0.152738	0.269251	0.567271	0.57053	0.999963
chr1:25643362-25644139	12.1812	-0.128613	0.273658	-0.469975	0.638373	0.999963
chr1:25648239-25650380	56.9163	0.372011	0.262962	1.41469	0.157158	0.999963
chr1:25664935-25665407	9.34814	0.0623919	0.267916	0.232878	0.815856	0.999963
chr1:25665933-25667253	40.8844	-0.0326723	0.263244	-0.124114	0.901225	0.999963
chr1:25713480-25715189	48.1435	0.124314	0.25674	0.484202	0.628243	0.999963
chr1:25729808-25731003	30.6474	0.324724	0.268149	1.21098	0.225902	0.999963
chr1:25799413-25800060	17.7905	0.206277	0.270332	0.763052	0.445433	0.999963
chr1:25800628-25801385	9.79526	0.24458	0.255433	0.957512	0.338309	0.999963
chr1:25818979-25821093	55.2615	0.109767	0.275359	0.398631	0.690165	0.999963
chr1:25895338-25897194	31.2756	-0.0322479	0.272147	-0.118494	0.905676	0.999963
chr1:25898027-25898457	8.34004	0.278194	0.258061	1.07802	0.281025	0.999963
chr1:25899657-25901171	39.0575	0.110014	0.26116	0.421252	0.673571	0.999963
chr1:25902066-25902735	13.3933	-0.162271	0.275442	-0.589128	0.555775	0.999963
chr1:25902973-25909831	490.803	-0.315236	0.209147	-1.50725	0.131748	0.999963
chr1:25921138-25924878	162.344	-0.154417	0.230826	-0.668974	0.503512	0.999963
chr1:25925693-25928854	115.413	0.0253122	0.253333	0.0999166	0.920411	0.999963
chr1:25932862-25934588	54.1841	0.136118	0.255209	0.533358	0.593786	0.999963
chr1:25996688-25998049	55.8141	0.119386	0.261007	0.457405	0.64738	0.999963
chr1:25998371-25999109	59.1273	0.0196079	0.257842	0.0760461	0.939382	0.999963
chr1:26015605-26017812	53.5501	0.152292	0.268827	0.566506	0.57105	0.999963
chr1:26021780-26022670	13.5444	0.120282	0.26814	0.448578	0.653736	0.999963
chr1:26034789-26036106	28.3345	0.240217	0.274664	0.874585	0.3818	0.999963
chr1:26109720-26112696	114.484	-0.0930786	0.2674	-0.348087	0.727775	0.999963
chr1:26161204-26162373	16.3051	0.239232	0.254203	0.941107	0.34665	0.999963
chr1:26168351-26170382	47.6802	0.258991	0.275059	0.941584	0.346406	0.999963
chr1:26233262-26233821	12.6922	0.120211	0.270612	0.444219	0.656884	0.999963
chr1:26234156-26235682	52.8458	0.00901571	0.27401	0.0329028	0.973752	0.999963
chr1:26279198-26280847	31.685	0.174685	0.275241	0.634661	0.525649	0.999963
chr1:26281327-26282985	24.0566	-0.0887581	0.273943	-0.324001	0.745937	0.999963
chr1:26306933-26307362	12.0245	0.216562	0.274264	0.789612	0.429754	0.999963
chr1:26417312-26418769	31.6543	0.0554346	0.268223	0.206674	0.836265	0.999963
chr1:26429178-26429913	13.5408	-0.342222	0.275141	-1.24381	0.21357	0.999963
chr1:26430111-26431135	27.2885	-0.319347	0.273713	-1.16672	0.243323	0.999963
chr1:26431553-26433227	74.8075	-0.257764	0.248959	-1.03537	0.300496	0.999963
chr1:26468975-26472973	120.57	-0.172408	0.271819	-0.634276	0.525901	0.999963
chr1:26473354-26473806	11.7916	0.0410012	0.27383	0.149732	0.880976	0.999963
chr1:26500046-26501944	39.1888	0.184795	0.275951	0.669665	0.503071	0.999963
chr1:26529211-26530183	19.7914	0.480207	0.275315	1.74421	0.0811223	0.999963
chr1:26602826-26605620	67.3806	-0.155292	0.247145	-0.628345	0.529778	0.999963
chr1:26616424-26617301	18.274	-0.0173731	0.275721	-0.0630098	0.949759	0.999963
chr1:26617681-26618044	9.41624	-0.0433957	0.266731	-0.162694	0.870759	0.999963
chr1:26618099-26622534	220.933	-0.23512	0.232377	-1.01181	0.311631	0.999963
chr1:26690482-26691433	37.3869	0.165464	0.264106	0.626508	0.530982	0.999963
chr1:26691650-26700757	351.786	-0.0534227	0.238368	-0.224118	0.822665	0.999963
chr1:26722410-26724501	44.7364	-0.208106	0.258267	-0.805777	0.420372	0.999963
chr1:26724558-26725680	23.4965	-0.341944	0.275332	-1.24194	0.214261	0.999963
chr1:26783299-26783866	16.1272	0.0571146	0.274874	0.207785	0.835397	0.999963
chr1:26785037-26789263	193.375	-0.0121009	0.252307	-0.0479611	0.961747	0.999963
chr1:26789443-26789936	11.7018	-0.254586	0.273115	-0.932156	0.351256	0.999963
chr1:26825650-26826598	29.0328	0.178779	0.275199	0.649638	0.515926	0.999963
chr1:26826942-26827620	12.3395	0.276196	0.26014	1.06172	0.288363	0.999963
chr1:26889588-26890889	27.4224	-0.222315	0.27563	-0.806568	0.419915	0.999963
chr1:26899100-26901169	70.6629	-0.204556	0.251892	-0.812079	0.416746	0.999963
chr1:26921706-26922690	25.0201	0.177038	0.275928	0.641607	0.521128	0.999963
chr1:26993141-26993937	10.6788	0.174892	0.25812	0.677559	0.498051	0.999963
chr1:27002345-27003237	15.3317	-0.0121279	0.275028	-0.0440969	0.964827	0.999963
chr1:27057047-27059470	79.046	-0.114613	0.249319	-0.459704	0.645729	0.999963
chr1:27087269-27088393	23.6578	-0.169777	0.275503	-0.616241	0.537735	0.999963
chr1:27098566-27100409	28.8988	0.142317	0.275611	0.516368	0.605597	0.999963
chr1:27139276-27141321	41.1056	0.0447963	0.269376	0.166297	0.867924	0.999963
chr1:27148537-27150286	26.0549	-0.113691	0.274533	-0.414124	0.678783	0.999963
chr1:27154437-27155710	26.5497	0.0139932	0.274193	0.0510343	0.959298	0.999963
chr1:27233608-27234209	13.7497	0.0810826	0.273055	0.296946	0.766507	0.999963
chr1:27307018-27307859	9.92171	0.0916125	0.258764	0.354039	0.72331	0.999963
chr1:27317680-27319212	45.231	-0.043505	0.262847	-0.165514	0.868539	0.999963
chr1:27321299-27323521	85.2128	0.123098	0.251118	0.490201	0.623992	0.999963
chr1:27365704-27366818	15.5629	0.213318	0.274825	0.776197	0.437632	0.999963
chr1:27392564-27393680	20.7677	0.391187	0.266695	1.4668	0.142432	0.999963
chr1:27418445-27418753	6.89199	0.0379642	0.248751	0.152619	0.878699	0.999963
chr1:27426699-27428668	52.2501	0.0716023	0.256883	0.278736	0.780448	0.999963
chr1:27450969-27452372	38.1263	-0.0637702	0.265224	-0.240439	0.80999	0.999963
chr1:27486325-27486565	7.48997	0.106691	0.251698	0.423885	0.67165	0.999963
chr1:27487842-27488593	20.4599	-0.037288	0.2759	-0.13515	0.892493	0.999963
chr1:27489541-27490868	31.9559	-0.0399096	0.272955	-0.146213	0.883753	0.999963
chr1:27496506-27497192	12.6787	-0.101512	0.272793	-0.372122	0.709802	0.999963
chr1:27497530-27497977	10.0247	0.211994	0.269636	0.786225	0.431736	0.999963
chr1:27518442-27519417	16.9408	0.213781	0.275404	0.776248	0.437603	0.999963
chr1:27520480-27520989	8.90301	0.205106	0.263103	0.779565	0.435647	0.999963
chr1:27522105-27523788	28.7539	0.109405	0.275873	0.396579	0.691678	0.999963
chr1:27524953-27528826	66.4551	0.304174	0.27109	1.12204	0.261846	0.999963
chr1:27535234-27536818	23.6554	0.0496799	0.27551	0.18032	0.856901	0.999963
chr1:27559303-27562629	81.4703	0.196889	0.268937	0.732101	0.464107	0.999963
chr1:27565608-27568489	83.0359	0.103915	0.263398	0.394518	0.693198	0.999963
chr1:27571918-27572904	19.6306	0.350039	0.275763	1.26935	0.204317	0.999963
chr1:27573154-27573717	9.42983	0.140389	0.267006	0.525791	0.599033	0.999963
chr1:27589207-27589771	11.6376	0.240531	0.265099	0.907326	0.364235	0.999963
chr1:27590344-27595229	137.435	0.267635	0.270095	0.990892	0.321738	0.999963
chr1:27595641-27598420	35.0156	0.235458	0.275825	0.853652	0.393298	0.999963
chr1:27599160-27599661	8.45951	0.157005	0.260625	0.602417	0.546896	0.999963
chr1:27601774-27604500	53.1983	0.116329	0.275984	0.421505	0.673386	0.999963
chr1:27624919-27625410	7.51547	0.210089	0.248466	0.845544	0.397807	0.999963
chr1:27671640-27673089	46.2901	-0.101441	0.257832	-0.393438	0.693996	0.999963
chr1:27724890-27725547	24.385	0.178854	0.274588	0.651353	0.514819	0.999963
chr1:27725965-27727178	32.4966	0.255296	0.274313	0.930674	0.352022	0.999963
chr1:27769923-27771056	23.7494	-0.0754189	0.272399	-0.276869	0.78188	0.999963
chr1:27771594-27774762	142.105	0.0128503	0.227557	0.0564706	0.954967	0.999963
chr1:27829914-27832815	95.395	0.167974	0.248498	0.67596	0.499066	0.999963
chr1:27913818-27914564	17.7098	0.00568385	0.273897	0.0207518	0.983444	0.999963
chr1:27914869-27915443	31.2675	0.0229361	0.275581	0.0832281	0.93367	0.999963
chr1:27971563-27972167	11.6815	-0.315157	0.27191	-1.15905	0.246436	0.999963
chr1:27980085-27982864	89.8965	-0.227385	0.238178	-0.954687	0.339736	0.999963
chr1:28015043-28016207	24.7103	0.16416	0.272899	0.60154	0.54748	0.999963
chr1:28078803-28079828	17.5375	0.0608156	0.27604	0.220315	0.825626	0.999963
chr1:28087592-28088965	39.9372	-0.0235526	0.275148	-0.0855997	0.931785	0.999963
chr1:28104442-28105260	32.5296	0.0720436	0.266337	0.270498	0.786777	0.999963
chr1:28232325-28233445	31.9674	0.0249825	0.271814	0.0919104	0.926769	0.999963
chr1:28235147-28237290	68.464	0.277905	0.267963	1.0371	0.299688	0.999963
chr1:28245936-28247202	49.6165	-0.0841786	0.257749	-0.326591	0.743977	0.999963
chr1:28259558-28260503	18.4162	0.15611	0.262268	0.59523	0.55169	0.999963
chr1:28328265-28330052	97.8284	-0.0284024	0.245341	-0.115767	0.907837	0.999963
chr1:28368904-28371101	99.6773	-0.0700608	0.26136	-0.268063	0.788651	0.999963
chr1:28373635-28374809	19.4243	-0.25557	0.275508	-0.927632	0.353599	0.999963
chr1:28450360-28451825	40.8529	0.0909659	0.259364	0.350727	0.725793	0.999963
chr1:28505155-28507531	88.2963	0.0202772	0.244897	0.0827989	0.934011	0.999963
chr1:28507841-28508678	16.3652	0.0742934	0.275928	0.269249	0.787738	0.999963
chr1:28517768-28519595	35.0571	-0.00414083	0.276067	-0.0149994	0.988033	0.999963
chr1:28552255-28554024	55.6091	0.0434168	0.2656	0.163467	0.870151	0.999963
chr1:28580500-28582582	43.1352	0.2051	0.27157	0.755239	0.450105	0.999963
chr1:28603225-28603583	8.36589	-0.241431	0.262559	-0.919531	0.357818	0.999963
chr1:28641857-28645224	187.091	-0.140034	0.245046	-0.571459	0.567689	0.999963
chr1:28647219-28650185	217.797	-0.276674	0.218945	-1.26366	0.20635	0.999963
chr1:28667344-28670205	124.369	-0.168671	0.248275	-0.679372	0.496902	0.999963
chr1:28735904-28738544	110.238	0.145735	0.252397	0.577403	0.563667	0.999963
chr1:28755914-28757728	37.3232	-0.14456	0.269646	-0.536112	0.591881	0.999963
chr1:28835707-28836349	12.9961	0.286802	0.269809	1.06298	0.28779	0.999963
chr1:28865209-28866170	22.7078	0.188259	0.276061	0.681947	0.495273	0.999963
chr1:28913790-28916790	90.6133	0.184318	0.252469	0.730061	0.465353	0.999963
chr1:28926971-28928673	59.2156	-0.0179763	0.251122	-0.071584	0.942933	0.999963
chr1:29042922-29044374	28.2491	-0.0873251	0.271886	-0.321183	0.748072	0.999963
chr1:29097307-29097982	11.6014	-0.227775	0.272841	-0.834826	0.403815	0.999963
chr1:29156395-29156934	10.8989	-0.181756	0.272585	-0.666787	0.504908	0.999963
chr1:29163250-29165488	56.9726	-0.151521	0.256363	-0.591042	0.554492	0.999963
chr1:29180312-29183043	127.36	-0.0849347	0.247744	-0.342833	0.731724	0.999963
chr1:29230307-29231495	33.7161	0.224291	0.274233	0.817886	0.413423	0.999963
chr1:29257362-29257701	5.23613	0.00397908	0.217339	0.0183082	0.985393	0.999963
chr1:29373341-29373946	11.5423	-0.0263383	0.272627	-0.0966096	0.923036	0.999963
chr1:29382773-29384171	32.908	-0.033822	0.272288	-0.124214	0.901146	0.999963
chr1:29509252-29509540	6.31373	-0.280422	0.247745	-1.1319	0.257677	0.999963
chr1:29682244-29684523	61.7962	-0.342748	0.266922	-1.28407	0.199116	0.999963
chr1:29691403-29691853	11.4405	0.0649325	0.272246	0.238507	0.811488	0.999963
chr1:29692183-29698285	184.317	-0.0281823	0.232336	-0.1213	0.903453	0.999963
chr1:29706601-29706984	8.65138	0.104562	0.256821	0.407139	0.683906	0.999963
chr1:29708773-29709612	16.995	0.0120346	0.273857	0.0439447	0.964948	0.999963
chr1:29749161-29750285	20.6672	0.192404	0.275371	0.698709	0.484734	0.999963
chr1:29930073-29932703	73.8817	0.0508314	0.259146	0.19615	0.844493	0.999963
chr1:29973529-29975067	40.1969	0.0495137	0.259932	0.190487	0.848927	0.999963
chr1:30034047-30035048	14.6479	0.106403	0.267632	0.397573	0.690945	0.999963
chr1:30060749-30061200	8.30831	0.308269	0.256911	1.19991	0.230175	0.999963
chr1:30099738-30100121	7.01528	-0.0133853	0.253201	-0.0528644	0.95784	0.999963
chr1:30217222-30219653	54.2321	0.114141	0.261914	0.435796	0.662985	0.999963
chr1:30249936-30251932	51.5381	-0.0879131	0.253539	-0.346743	0.728784	0.999963
chr1:30275542-30277510	51.5351	0.244117	0.26644	0.916216	0.359554	0.999963
chr1:30411595-30412492	16.5585	0.0168741	0.276015	0.0611347	0.951252	0.999963
chr1:30666490-30667420	23.3833	0.113399	0.274807	0.41265	0.679863	0.999963
chr1:30689888-30690341	11.5911	-0.0758021	0.27277	-0.277898	0.781091	0.999963
chr1:30717484-30718100	9.54365	0.131073	0.258417	0.507216	0.612003	0.999963
chr1:30718757-30719215	9.72398	0.260755	0.255663	1.01992	0.307767	0.999963
chr1:30816035-30817327	23.8426	0.420753	0.276061	1.52413	0.127477	0.999963
chr1:30823989-30824980	26.1093	0.367129	0.276069	1.32985	0.183569	0.999963
chr1:30853800-30854149	10.0249	0.118027	0.265285	0.444907	0.656387	0.999963
chr1:30878414-30882567	119.534	0.138907	0.268569	0.51721	0.605009	0.999963
chr1:30884992-30885989	15.0707	0.317208	0.274428	1.15589	0.247727	0.999963
chr1:30908915-30909638	10.8777	0.02607	0.260597	0.100039	0.920313	0.999963
chr1:30941009-30941708	11.1263	0.00923374	0.267462	0.0345235	0.97246	0.999963
chr1:30943861-30944456	15.0375	0.210175	0.275376	0.76323	0.445326	0.999963
chr1:31021052-31021924	18.2707	0.19757	0.275333	0.717569	0.473023	0.999963
chr1:31062882-31066686	177.392	-0.0348845	0.220237	-0.158395	0.874145	0.999963
chr1:31122364-31123420	23.3621	0.49329	0.274361	1.79796	0.072184	0.999963
chr1:31153815-31156125	78.4431	0.0192928	0.260132	0.0741653	0.940879	0.999963
chr1:31198792-31199279	9.94089	0.181832	0.256215	0.709687	0.477898	0.999963
chr1:31214533-31216327	40.3803	0.062147	0.275385	0.225673	0.821455	0.999963
chr1:31227299-31228787	46.9943	-0.0338382	0.265299	-0.127547	0.898507	0.999963
chr1:31238531-31240435	28.843	0.360319	0.274161	1.31426	0.18876	0.999963
chr1:31295822-31298608	111.018	0.147377	0.252498	0.583674	0.559439	0.999963
chr1:31300939-31301386	11.6041	0.273739	0.273063	1.00248	0.316114	0.999963
chr1:31318443-31319921	30.3038	-0.180753	0.271118	-0.666693	0.504968	0.999963
chr1:31374018-31374986	16.1747	0.22741	0.275145	0.826512	0.408514	0.999963
chr1:31375588-31378465	73.3902	-0.0311614	0.25466	-0.122365	0.90261	0.999963
chr1:31412482-31416378	204.069	-0.0375375	0.266197	-0.141014	0.887859	0.999963
chr1:31482403-31484505	79.6881	-0.139036	0.247249	-0.562333	0.573889	0.999963
chr1:31564267-31564952	21.0563	0.311409	0.276056	1.12807	0.259292	0.999963
chr1:31617730-31618394	9.71021	0.148382	0.249215	0.595399	0.551577	0.999963
chr1:31643607-31646511	151.514	0.225729	0.248296	0.909113	0.36329	0.999963
chr1:31652284-31658104	211.488	0.186703	0.241978	0.77157	0.440369	0.999963
chr1:31659087-31660004	12.2609	0.431505	0.27232	1.58455	0.113069	0.999963
chr1:31665783-31666933	14.2565	0.205555	0.260958	0.787692	0.430877	0.999963
chr1:31693286-31694251	14.7634	0.41172	0.274253	1.50124	0.133294	0.999963
chr1:31694585-31694857	7.80289	0.0535392	0.262204	0.204189	0.838206	0.999963
chr1:31734463-31734819	7.13458	-0.333564	0.255404	-1.30603	0.191544	0.999963
chr1:31756219-31763441	152.103	0.39092	0.262639	1.48843	0.136637	0.999963
chr1:31763693-31764031	10.1336	0.348782	0.265327	1.31454	0.188666	0.999963
chr1:31764115-31766468	50.0838	-0.159684	0.272462	-0.58608	0.557821	0.999963
chr1:31779888-31780505	15.2362	0.129291	0.273779	0.472247	0.636751	0.999963
chr1:31781068-31786034	155.935	0.0762929	0.263181	0.289888	0.771902	0.999963
chr1:31786126-31790425	114.734	0.188385	0.259314	0.726474	0.467548	0.999963
chr1:31810713-31812705	46.036	-0.104474	0.266933	-0.391388	0.695511	0.999963
chr1:31896916-31898154	28.9558	-0.133638	0.26947	-0.495928	0.619945	0.999963
chr1:31906259-31906650	8.32434	-0.501895	0.26379	-1.90263	0.0570885	0.999963
chr1:31923678-31924978	35.293	0.0319955	0.265779	0.120384	0.904179	0.999963
chr1:31926319-31927710	26.8033	0.106019	0.26963	0.393202	0.69417	0.999963
chr1:31936787-31938102	24.8505	0.0737565	0.274972	0.268233	0.78852	0.999963
chr1:31938415-31939060	14.4	0.148016	0.271002	0.54618	0.584942	0.999963
chr1:31951183-31952823	50.913	0.0537279	0.253884	0.211624	0.8324	0.999963
chr1:31962954-31963282	8.76051	0.318891	0.263203	1.21158	0.225673	0.999963
chr1:31970544-31971677	32.8631	0.121384	0.269019	0.45121	0.651838	0.999963
chr1:31984752-31985808	29.4659	-0.298349	0.270913	-1.10127	0.270779	0.999963
chr1:32012554-32016969	209.393	-0.0421777	0.237332	-0.177716	0.858946	0.999963
chr1:32020985-32021528	9.639	-0.260764	0.263183	-0.990808	0.321779	0.999963
chr1:32030234-32030814	15.6409	0.209223	0.275321	0.759923	0.447301	0.999963
chr1:32040195-32042096	31.5274	-0.106628	0.270828	-0.393712	0.693793	0.999963
chr1:32054318-32057133	74.6066	0.0708069	0.24689	0.286795	0.774269	0.999963
chr1:32060202-32064993	147.026	-0.0468766	0.231928	-0.202117	0.839825	0.999963
chr1:32070988-32074129	188.709	-0.0271215	0.246875	-0.109859	0.912521	0.999963
chr1:32107296-32109347	58.5018	-0.0210642	0.272865	-0.0771965	0.938467	0.999963
chr1:32127044-32128234	45.198	-0.102835	0.259199	-0.39674	0.691559	0.999963
chr1:32150580-32152038	35.8312	0.0281144	0.263448	0.106717	0.915013	0.999963
chr1:32178488-32180925	79.3519	-0.0451823	0.258647	-0.174687	0.861326	0.999963
chr1:32198818-32202682	181.713	0.147021	0.254101	0.578593	0.562864	0.999963
chr1:32204946-32206380	36.7914	0.285376	0.275131	1.03724	0.299625	0.999963
chr1:32221165-32223333	68.4788	0.374287	0.271467	1.37876	0.167969	0.999963
chr1:32291572-32292828	18.9551	-0.120604	0.274311	-0.439663	0.660181	0.999963
chr1:32334438-32336184	61.0787	0.33264	0.275779	1.20619	0.227746	0.999963
chr1:32336500-32337265	11.8144	0.108113	0.262572	0.411745	0.680526	0.999963
chr1:32337752-32339330	34.5655	0.0899742	0.275885	0.326129	0.744327	0.999963
chr1:32350595-32353221	58.9452	0.10114	0.27375	0.369461	0.711784	0.999963
chr1:32355899-32358981	87.0087	0.232192	0.249244	0.931587	0.35155	0.999963
chr1:32393401-32396417	183.855	-0.195252	0.237454	-0.822274	0.410921	0.999963
chr1:32463999-32465407	29.4816	-0.0863807	0.275157	-0.313933	0.753572	0.999963
chr1:32499776-32501833	67.9151	-0.107667	0.256513	-0.419732	0.674681	0.999963
chr1:32538566-32539581	40.6312	-0.120005	0.259334	-0.462742	0.643549	0.999963
chr1:32539969-32541156	39.2881	0.094188	0.266372	0.353595	0.723642	0.999963
chr1:32636773-32637628	17.6956	0.0729013	0.274916	0.265176	0.790874	0.999963
chr1:32649671-32652480	206.463	-0.0384047	0.242985	-0.158054	0.874414	0.999963
chr1:32753470-32753888	8.6229	0.293568	0.25999	1.12915	0.258834	0.999963
chr1:32754213-32754844	16.8889	0.35345	0.270542	1.30645	0.1914	0.999963
chr1:32755165-32755727	8.7666	0.116458	0.255289	0.456183	0.648259	0.999963
chr1:32765336-32766900	30.1496	0.283319	0.274802	1.03099	0.302544	0.999963
chr1:32816362-32819153	85.5759	-0.0803428	0.265322	-0.302812	0.762033	0.999963
chr1:32872802-32873498	10.5417	0.382317	0.264914	1.44318	0.148971	0.999963
chr1:32878057-32879121	25.0046	0.113197	0.276007	0.410122	0.681716	0.999963
chr1:32933710-32934216	9.74012	-0.397202	0.269931	-1.4715	0.141157	0.999963
chr1:32946599-32949501	129.709	-0.0365889	0.231957	-0.15774	0.874662	0.999963
chr1:32963504-32965852	79.5114	-0.0178966	0.26166	-0.0683964	0.94547	0.999963
chr1:32971687-32973515	54.0559	0.0689338	0.269139	0.256128	0.797852	0.999963
chr1:32984013-32985670	58.4745	-0.0904434	0.265581	-0.340549	0.733443	0.999963
chr1:33036564-33036876	8.64965	0.218602	0.244104	0.895529	0.370504	0.999963
chr1:33080552-33081516	21.6803	0.188627	0.275554	0.684536	0.493637	0.999963
chr1:33126741-33127893	36.3567	0.0658214	0.267593	0.245976	0.805701	0.999963
chr1:33181062-33181744	9.50145	0.136255	0.245059	0.55601	0.578204	0.999963
chr1:33190063-33191455	31.8449	0.0626134	0.267914	0.233707	0.815212	0.999963
chr1:33255455-33256171	18.0756	0.221571	0.255855	0.866001	0.38649	0.999963
chr1:33256872-33258299	82.9201	-0.27211	0.251207	-1.08321	0.278714	0.999963
chr1:33283515-33285145	29.1455	-0.318015	0.27136	-1.17193	0.241227	0.999963
chr1:33334498-33335247	12.4702	-0.401493	0.273907	-1.4658	0.142702	0.999963
chr1:33336983-33339946	70.7431	-0.126948	0.243182	-0.522029	0.60165	0.999963
chr1:33341454-33343342	42.9755	0.0177752	0.268574	0.0661834	0.947232	0.999963
chr1:33343935-33345155	20.6542	-0.399883	0.274821	-1.45507	0.145651	0.999963
chr1:33346413-33349688	116.631	-0.104041	0.239952	-0.433592	0.664584	0.999963
chr1:33350029-33351175	44.7733	-0.0769975	0.273852	-0.281165	0.778584	0.999963
chr1:33357975-33359295	27.3497	-0.0148735	0.271918	-0.0546985	0.956379	0.999963
chr1:33360877-33367697	396.7	-0.213582	0.23533	-0.907586	0.364097	0.999963
chr1:33377596-33379062	30.8914	-0.00971954	0.2708	-0.035892	0.971368	0.999963
chr1:33382429-33384647	45.486	0.129685	0.259105	0.50051	0.616716	0.999963
chr1:33389106-33395573	364.884	-0.143087	0.211231	-0.677396	0.498155	0.999963
chr1:33395799-33396710	21.8254	-0.103898	0.274993	-0.377822	0.705563	0.999963
chr1:33408665-33411599	174.31	-0.211924	0.226308	-0.936439	0.349047	0.999963
chr1:33428096-33431977	107.63	-0.0136675	0.240624	-0.0568004	0.954704	0.999963
chr1:33469889-33472343	59.1053	-0.157954	0.2481	-0.636654	0.52435	0.999963
chr1:33472729-33473353	21.1869	-0.0638559	0.275995	-0.231366	0.81703	0.999963
chr1:33661201-33661844	15.2825	-0.037384	0.276048	-0.135425	0.892275	0.999963
chr1:33662100-33662806	15.3464	-0.0134996	0.275175	-0.0490584	0.960873	0.999963
chr1:33703303-33704432	17.9285	-0.0698693	0.276001	-0.253149	0.800153	0.999963
chr1:33797349-33798751	24.1998	-0.0196246	0.275336	-0.0712752	0.943179	0.999963
chr1:33837068-33839003	66.5802	-0.00536184	0.245118	-0.0218745	0.982548	0.999963
chr1:33850308-33851337	19.458	-0.11174	0.275174	-0.40607	0.684691	0.999963
chr1:33940744-33941592	19.2272	-0.00286986	0.276066	-0.0103956	0.991706	0.999963
chr1:33957262-33959696	62.6718	0.0201107	0.261072	0.0770312	0.938599	0.999963
chr1:34162481-34163190	10.3617	0.131558	0.264579	0.497235	0.619023	0.999963
chr1:34165296-34165888	11.5686	0.130331	0.271852	0.479421	0.631639	0.999963
chr1:34167009-34167774	11.6914	0.211387	0.263931	0.800918	0.423179	0.999963
chr1:34229935-34231234	31.0999	0.498814	0.268963	1.85458	0.063656	0.999963
chr1:34231463-34233254	33.7583	0.0234528	0.265131	0.0884576	0.929513	0.999963
chr1:34265619-34271074	217.06	0.0489083	0.221117	0.221188	0.824946	0.999963
chr1:34285954-34287601	44.8893	0.21365	0.261351	0.817481	0.413653	0.999963
chr1:34327949-34329844	38.6979	-0.023581	0.26614	-0.0886039	0.929397	0.999963
chr1:34375769-34376622	20.7091	-0.0448491	0.275798	-0.162616	0.870821	0.999963
chr1:34379566-34381602	41.264	-0.0192243	0.265007	-0.0725427	0.94217	0.999963
chr1:34385238-34386089	24.1352	0.310774	0.273453	1.13648	0.255756	0.999963
chr1:34395008-34396308	50.4047	-0.111766	0.263629	-0.423951	0.671602	0.999963
chr1:34397304-34398505	24.9115	0.0438186	0.275106	0.159279	0.873449	0.999963
chr1:34431970-34434493	85.211	0.0220083	0.253744	0.0867343	0.930883	0.999963
chr1:34441705-34442376	15.6483	-0.0737857	0.275931	-0.267406	0.789156	0.999963
chr1:34478988-34479883	20.8422	0.121631	0.275254	0.441887	0.658571	0.999963
chr1:34588909-34591294	72.9522	0.185771	0.249118	0.745715	0.455839	0.999963
chr1:34606024-34607568	35.7526	0.269727	0.265148	1.01727	0.309025	0.999963
chr1:34644792-34646106	28.0244	-0.0708895	0.27181	-0.260805	0.794243	0.999963
chr1:34655247-34656055	13.0336	0.288312	0.26726	1.07877	0.28069	0.999963
chr1:34683348-34685540	74.485	-0.0598681	0.249152	-0.240288	0.810107	0.999963
chr1:34687907-34688874	15.7431	0.337221	0.27267	1.23674	0.216185	0.999963
chr1:34858734-34860153	28.5918	0.204139	0.27562	0.740655	0.458903	0.999963
chr1:34870173-34872014	34.8442	-0.0551139	0.268108	-0.205566	0.83713	0.999963
chr1:34929779-34930464	9.35719	0.284159	0.250504	1.13435	0.256648	0.999963
chr1:35030830-35032609	56.7542	-0.120138	0.259824	-0.462382	0.643807	0.999963
chr1:35078818-35080139	36.436	0.235311	0.268371	0.876809	0.38059	0.999963
chr1:35191143-35194121	121.601	0.0287102	0.254595	0.112768	0.910214	0.999963
chr1:35201547-35203391	81.3572	-0.0112377	0.255643	-0.0439585	0.964937	0.999963
chr1:35267793-35269935	75.503	0.107253	0.248378	0.431813	0.665877	0.999963
chr1:35305870-35306493	14.6473	0.104377	0.272985	0.382356	0.702198	0.999963
chr1:35425986-35426613	11.4259	-0.232287	0.271201	-0.856512	0.391715	0.999963
chr1:35447992-35449403	29.7661	0.0195695	0.268031	0.073012	0.941797	0.999963
chr1:35451572-35455374	101.904	-0.128228	0.23289	-0.550596	0.581911	0.999963
chr1:35500143-35500602	11.1204	-0.00344149	0.270801	-0.0127086	0.98986	0.999963
chr1:35536089-35536685	14.6241	-0.0822236	0.273471	-0.300667	0.763668	0.999963
chr1:35537018-35537837	19.6151	-0.292801	0.275652	-1.06221	0.28814	0.999963
chr1:35556704-35558857	62.6126	0.113285	0.271776	0.416831	0.676802	0.999963
chr1:35640561-35642551	115.172	-0.0677865	0.248257	-0.27305	0.784815	0.999963
chr1:35707146-35708812	27.771	0.114803	0.269619	0.425797	0.670256	0.999963
chr1:35717525-35719197	24.8874	0.220147	0.276045	0.797501	0.42516	0.999963
chr1:35724979-35726633	34.9133	-0.0345778	0.268429	-0.128815	0.897504	0.999963
chr1:35727032-35727549	11.6637	0.61975	0.270907	2.28769	0.0221558	0.999963
chr1:35768575-35770226	42.529	-0.0162249	0.263552	-0.0615625	0.950911	0.999963
chr1:35807392-35808027	10.7519	0.304957	0.265529	1.14849	0.250768	0.999963
chr1:35808424-35809251	19.6792	-0.0472701	0.274206	-0.172389	0.863132	0.999963
chr1:35883217-35884796	43.9185	0.280057	0.273207	1.02507	0.30533	0.999963
chr1:35885240-35887005	52.0052	-0.146762	0.261076	-0.562142	0.574019	0.999963
chr1:35930046-35932485	71.3483	0.380435	0.256812	1.48138	0.138506	0.999963
chr1:35934938-35937101	54.8315	-0.0805112	0.259218	-0.310592	0.756111	0.999963
chr1:36024923-36025490	11.8836	-0.16023	0.266726	-0.600729	0.548021	0.999963
chr1:36080151-36080890	21.3751	0.251934	0.275167	0.915566	0.359895	0.999963
chr1:36083586-36084670	22.8246	0.366836	0.275688	1.33062	0.183314	0.999963
chr1:36088375-36089883	37.3463	0.0513477	0.276069	0.185996	0.852448	0.999963
chr1:36148780-36150190	31.3224	0.183469	0.274232	0.669029	0.503477	0.999963
chr1:36154582-36158145	121.743	0.112211	0.271883	0.41272	0.679812	0.999963
chr1:36160912-36161620	11.7511	-0.0632666	0.269007	-0.235186	0.814064	0.999963
chr1:36223087-36225576	117.226	0.0958807	0.252101	0.380327	0.703703	0.999963
chr1:36365359-36366581	24.8381	-0.0607403	0.272783	-0.222669	0.823793	0.999963
chr1:36384565-36385880	52.5087	0.247592	0.274569	0.90175	0.36719	0.999963
chr1:36386186-36389056	114.656	-0.259787	0.251858	-1.03148	0.302315	0.999963
chr1:36396935-36398940	91.3256	0.0353995	0.253634	0.139569	0.889	0.999963
chr1:36400567-36401572	14.841	-0.0729328	0.267511	-0.272634	0.785134	0.999963
chr1:36449867-36451299	65.1102	0.179895	0.270194	0.665798	0.50554	0.999963
chr1:36463303-36465691	125.415	0.0325348	0.239886	0.135626	0.892117	0.999963
chr1:36516562-36517694	15.8898	-0.0329678	0.27281	-0.120845	0.903814	0.999963
chr1:36566103-36566684	8.01706	0.0415292	0.254379	0.163257	0.870316	0.999963
chr1:36586561-36587614	20.4794	0.206056	0.275954	0.746704	0.455242	0.999963
chr1:36709061-36710794	28.6679	0.381082	0.274549	1.38803	0.165127	0.999963
chr1:36710965-36712054	22.3376	0.237759	0.275111	0.86423	0.387461	0.999963
chr1:36932710-36933222	11.1291	0.105129	0.270956	0.387994	0.69802	0.999963
chr1:36960806-36962343	29.6772	0.013425	0.276068	0.0486292	0.961215	0.999963
chr1:36975989-36980191	123.456	-0.117136	0.244716	-0.478662	0.632179	0.999963
chr1:36987609-36990504	55.4951	-0.174453	0.273089	-0.638816	0.522943	0.999963
chr1:37030930-37032119	19.1053	-0.0122229	0.276062	-0.0442759	0.964684	0.999963
chr1:37033401-37034161	13.751	0.169447	0.244502	0.693031	0.48829	0.999963
chr1:37034608-37036083	31.5335	-0.109305	0.275821	-0.396287	0.691893	0.999963
chr1:37063736-37065374	26.7451	-0.303563	0.275882	-1.10034	0.271185	0.999963
chr1:37073481-37074035	9.28473	0.0123041	0.261038	0.0471352	0.962405	0.999963
chr1:37077180-37079207	50.361	-0.158061	0.267236	-0.591466	0.554208	0.999963
chr1:37084156-37084751	12.4928	0.206837	0.273554	0.75611	0.449583	0.999963
chr1:37123064-37123954	16.0246	0.00881906	0.274987	0.0320708	0.974416	0.999963
chr1:37153583-37154263	10.5707	0.154421	0.266312	0.579852	0.562015	0.999963
chr1:37176882-37177430	9.05663	0.0347385	0.261367	0.132911	0.894264	0.999963
chr1:37177578-37178406	23.4876	-0.211586	0.274699	-0.770248	0.441153	0.999963
chr1:37233382-37236806	117.142	-0.133651	0.241166	-0.554186	0.579451	0.999963
chr1:37237844-37238600	17.0982	-0.0841989	0.276051	-0.305012	0.760357	0.999963
chr1:37246666-37247198	7.09459	-0.0138765	0.232399	-0.0597101	0.952387	0.999963
chr1:37262248-37263852	39.5598	0.0156852	0.265034	0.0591818	0.952807	0.999963
chr1:37265890-37268481	51.8729	-0.0964158	0.271696	-0.354866	0.72269	0.999963
chr1:37273491-37276816	66.4275	-0.128325	0.271848	-0.472046	0.636894	0.999963
chr1:37281299-37281702	10.2262	0.200783	0.270978	0.740957	0.45872	0.999963
chr1:37282443-37283844	22.5796	0.00366864	0.275794	0.0133021	0.989387	0.999963
chr1:37290160-37291770	33.6042	-0.0530264	0.272046	-0.194917	0.845458	0.999963
chr1:37293901-37295703	33.2081	-0.0946156	0.270987	-0.349152	0.726975	0.999963
chr1:37307161-37309850	63.4822	-0.27563	0.266973	-1.03243	0.301872	0.999963
chr1:37314379-37316616	43.4949	-0.301249	0.269367	-1.11836	0.263413	0.999963
chr1:37388882-37396482	182.012	-0.214761	0.249228	-0.861705	0.38885	0.999963
chr1:37399968-37402063	40.9447	-0.174024	0.268209	-0.648838	0.516443	0.999963
chr1:37404090-37405590	33.1423	0.244627	0.270457	0.904494	0.365733	0.999963
chr1:37409544-37410120	14.9827	-0.20119	0.274742	-0.732287	0.463993	0.999963
chr1:37410448-37411308	16.4523	0.241248	0.274976	0.877343	0.3803	0.999963
chr1:37432808-37433525	10.5602	0.194839	0.260589	0.747689	0.454648	0.999963
chr1:37437967-37439053	16.484	0.0761702	0.267461	0.28479	0.775805	0.999963
chr1:37513498-37515472	57.4112	0.249527	0.270662	0.921914	0.356574	0.999963
chr1:37553365-37554292	30.3523	0.192819	0.27396	0.703823	0.481543	0.999963
chr1:37556589-37557811	39.8317	0.295175	0.269523	1.09518	0.273439	0.999963
chr1:37595054-37595856	26.9719	0.144101	0.272943	0.527952	0.597533	0.999963
chr1:37596178-37596629	14.9033	0.397649	0.275401	1.44389	0.14877	0.999963
chr1:37689691-37690451	14.6033	0.129277	0.27301	0.473525	0.635839	0.999963
chr1:37691800-37692208	7.65766	-0.0485445	0.249808	-0.194328	0.845919	0.999963
chr1:37724424-37728308	143.279	0.0148595	0.263237	0.0564491	0.954984	0.999963
chr1:37763986-37768215	86.7134	0.0359439	0.257642	0.139511	0.889046	0.999963
chr1:37792902-37795847	63.6426	0.312547	0.27538	1.13496	0.25639	0.999963
chr1:37807055-37811088	116.593	0.024537	0.253484	0.0967992	0.922886	0.999963
chr1:37858610-37861078	78.4553	0.0818985	0.26395	0.31028	0.756348	0.999963
chr1:37881572-37883573	45.8797	0.043774	0.25999	0.168368	0.866294	0.999963
chr1:37931453-37932646	31.5583	-0.0104548	0.272726	-0.0383346	0.969421	0.999963
chr1:37946460-37947479	21.3116	0.0337713	0.275703	0.122491	0.90251	0.999963
chr1:37988898-37990517	34.8146	-0.0366106	0.275748	-0.132769	0.894376	0.999963
chr1:38011614-38013708	83.2013	0.0484452	0.257992	0.187778	0.851051	0.999963
chr1:38244205-38245288	24.686	0.169292	0.273999	0.617856	0.53667	0.999963
chr1:38248580-38248838	6.54683	0.182524	0.23667	0.771217	0.440579	0.999963
chr1:38257823-38259350	35.5245	-0.0687826	0.26646	-0.258135	0.796303	0.999963
chr1:38269298-38271791	62.4988	-0.0160153	0.26206	-0.0611133	0.951269	0.999963
chr1:38283278-38284096	12.0551	0.127856	0.271914	0.470208	0.638206	0.999963
chr1:38353252-38354156	22.8642	-0.0670898	0.2757	-0.243344	0.807739	0.999963
chr1:38370584-38372180	36.2918	-0.105249	0.266558	-0.394844	0.692958	0.999963
chr1:38474164-38477405	84.1227	0.0495832	0.255104	0.194365	0.84589	0.999963
chr1:38495930-38499175	106.633	-0.0853198	0.242183	-0.352295	0.724617	0.999963
chr1:38611728-38612438	12.3327	0.0884527	0.272075	0.325104	0.745102	0.999963
chr1:38613329-38615541	39.0246	-0.243002	0.270805	-0.897331	0.369542	0.999963
chr1:38727047-38728589	51.4289	-0.198841	0.258061	-0.770517	0.440993	0.999963
chr1:38782784-38783578	20.4396	0.0783741	0.275179	0.284812	0.775788	0.999963
chr1:38789355-38789847	14.3839	0.0223036	0.274703	0.0811919	0.935289	0.999963
chr1:38859935-38860866	29.8016	0.132882	0.270375	0.491474	0.623091	0.999963
chr1:38863309-38863897	13.4935	0.257703	0.275013	0.937057	0.348729	0.999963
chr1:38873573-38874276	20.0912	0.172637	0.275828	0.625886	0.53139	0.999963
chr1:38929553-38930708	27.0631	-0.0557919	0.271579	-0.205435	0.837232	0.999963
chr1:38989804-38993044	129.304	0.191919	0.239293	0.802025	0.422538	0.999963
chr1:39025381-39027511	118.816	0.000152702	0.248322	0.000614934	0.999509	0.999963
chr1:39080532-39083116	56.5991	0.281602	0.275246	1.02309	0.306265	0.999963
chr1:39097798-39099710	46.8447	-0.0284426	0.267536	-0.106313	0.915334	0.999963
chr1:39102280-39109249	230.447	-0.0662426	0.237699	-0.278683	0.780488	0.999963
chr1:39168775-39169324	8.55107	0.0373457	0.253386	0.147387	0.882827	0.999963
chr1:39170126-39171775	33.0759	-0.261072	0.267001	-0.977795	0.328176	0.999963
chr1:39173442-39174328	19.221	0.0752913	0.275581	0.273209	0.784692	0.999963
chr1:39185374-39185850	7.90813	-0.273393	0.259698	-1.05273	0.292463	0.999963
chr1:39187025-39187908	27.1679	-0.129228	0.27497	-0.46997	0.638376	0.999963
chr1:39266958-39270629	158.048	-0.279396	0.221989	-1.2586	0.208174	0.999963
chr1:39272352-39273616	31.1982	-0.102725	0.268556	-0.38251	0.702083	0.999963
chr1:39277293-39278638	30.4109	-0.178207	0.272163	-0.654781	0.512609	0.999963
chr1:39397691-39399847	47.2283	0.00286584	0.255416	0.0112203	0.991048	0.999963
chr1:39406268-39410888	120.646	-0.175471	0.247738	-0.708294	0.478763	0.999963
chr1:39411519-39411936	10.848	0.00419301	0.270821	0.0154826	0.987647	0.999963
chr1:39414628-39415241	15.1624	0.230129	0.274279	0.839031	0.401452	0.999963
chr1:39416586-39417518	18.5793	-0.0117136	0.275946	-0.042449	0.966141	0.999963
chr1:39437480-39438023	16.0179	-0.125855	0.276058	-0.4559	0.648462	0.999963
chr1:39558622-39560211	44.1476	0.197156	0.265323	0.743079	0.457434	0.999963
chr1:39575240-39577321	45.6774	0.0260627	0.272533	0.0956312	0.923813	0.999963
chr1:39653837-39654485	19.176	0.36065	0.2753	1.31002	0.190189	0.999963
chr1:39686944-39688303	21.9786	0.128097	0.2756	0.464795	0.642079	0.999963
chr1:39688452-39692855	77.3587	0.115788	0.272685	0.424622	0.671112	0.999963
chr1:39733458-39734694	21.4407	0.0444815	0.275626	0.161383	0.871792	0.999963
chr1:39738361-39739840	50.4746	0.109002	0.266868	0.408449	0.682944	0.999963
chr1:39740806-39741896	17.943	0.211048	0.275743	0.765381	0.444045	0.999963
chr1:39841791-39847989	174.075	-0.358062	0.221629	-1.61559	0.106182	0.999963
chr1:39862141-39863451	31.9875	0.0692685	0.266481	0.259938	0.794912	0.999963
chr1:39877025-39878945	44.1975	0.0600775	0.262427	0.228931	0.818923	0.999963
chr1:39881428-39890073	606.591	-0.228916	0.202966	-1.12785	0.259382	0.999963
chr1:39897562-39899411	38.6302	-0.124534	0.265916	-0.46832	0.639555	0.999963
chr1:39900730-39901680	18.1358	-0.0147326	0.267767	-0.0550202	0.956122	0.999963
chr1:39902024-39903038	31.7701	-0.0112981	0.27412	-0.0412158	0.967124	0.999963
chr1:39954775-39956409	24.3617	0.145133	0.273643	0.530375	0.595852	0.999963
chr1:40039040-40041697	78.811	-0.0159911	0.265511	-0.0602277	0.951974	0.999963
chr1:40056835-40057745	20.4868	0.256482	0.275954	0.929434	0.352664	0.999963
chr1:40096492-40098251	82.3716	0.0919022	0.254853	0.360608	0.718392	0.999963
chr1:40160237-40163255	180.547	-0.021836	0.233012	-0.0937122	0.925338	0.999963
chr1:40256374-40258870	143.457	-0.196614	0.229316	-0.857393	0.391228	0.999963
chr1:40314640-40316001	20.3675	-0.000292732	0.271579	-0.00107789	0.99914	0.999963
chr1:40373048-40376384	186.334	0.0441706	0.222537	0.198487	0.842664	0.999963
chr1:40381167-40382753	27.3726	0.30775	0.271654	1.13288	0.257267	0.999963
chr1:40385301-40387377	67.972	0.120922	0.254804	0.474569	0.635094	0.999963
chr1:40420607-40422114	37.2044	-0.164472	0.262661	-0.626176	0.5312	0.999963
chr1:40448523-40452179	248.602	-0.164361	0.220617	-0.74501	0.456266	0.999963
chr1:40476782-40477993	36.1103	0.316659	0.273223	1.15898	0.246466	0.999963
chr1:40508090-40509594	34.2347	0.10722	0.275019	0.389865	0.696636	0.999963
chr1:40530954-40532498	88.6558	-0.178976	0.236656	-0.756269	0.449488	0.999963
chr1:40637085-40638026	16.9733	0.0550299	0.275443	0.199787	0.841647	0.999963
chr1:40652504-40653167	10.6677	0.209184	0.264252	0.79161	0.428588	0.999963
chr1:40664437-40666142	22.6205	0.0917162	0.272963	0.336002	0.736869	0.999963
chr1:40690130-40693488	120.402	0.0816339	0.237001	0.344445	0.730512	0.999963
chr1:40699297-40700315	20.8636	-0.0148525	0.276052	-0.0538032	0.957092	0.999963
chr1:40708316-40711427	123.3	-0.104662	0.234953	-0.445459	0.655988	0.999963
chr1:40711651-40712661	20.3878	0.169712	0.276068	0.614745	0.538723	0.999963
chr1:40736109-40736809	16.4039	0.0149243	0.275959	0.0540817	0.95687	0.999963
chr1:40846183-40848316	108.535	-0.108756	0.233512	-0.465743	0.641399	0.999963
chr1:40861801-40862245	7.05855	0.324929	0.230027	1.41257	0.157783	0.999963
chr1:40978933-40981362	71.0991	0.164864	0.273781	0.602174	0.547058	0.999963
chr1:41226794-41227607	14.2895	-0.27277	0.274791	-0.992647	0.320882	0.999963
chr1:41241304-41243317	51.8746	0.213484	0.276069	0.773299	0.439346	0.999963
chr1:41268580-41269022	11.4189	-0.0254798	0.268292	-0.0949706	0.924338	0.999963
chr1:41285333-41288395	81.6289	0.157186	0.254571	0.617452	0.536937	0.999963
chr1:41313941-41316761	106.582	-0.0949406	0.254629	-0.372858	0.709254	0.999963
chr1:41357871-41358444	9.33496	0.124193	0.255294	0.48647	0.626634	0.999963
chr1:41360631-41364062	43.0304	0.324738	0.275979	1.17668	0.239325	0.999963
chr1:41365159-41367183	28.1206	0.0288165	0.274389	0.105021	0.916359	0.999963
chr1:41371754-41372182	6.06616	0.212593	0.234717	0.905744	0.365072	0.999963
chr1:41380517-41381354	14.1135	0.262653	0.264652	0.992443	0.320981	0.999963
chr1:41392785-41395415	70.0095	0.00856054	0.268549	0.031877	0.97457	0.999963
chr1:41395701-41396741	24.0555	0.174106	0.275041	0.633016	0.526723	0.999963
chr1:41397480-41400178	49.3653	-0.229289	0.273868	-0.837224	0.402467	0.999963
chr1:41400302-41400767	10.1844	-0.125433	0.270434	-0.463822	0.642775	0.999963
chr1:41402930-41405752	73.7205	0.0698839	0.268189	0.260577	0.794419	0.999963
chr1:41474331-41475528	17.3705	0.0645998	0.272244	0.237286	0.812435	0.999963
chr1:41486667-41487377	15.8233	0.360742	0.2684	1.34405	0.178933	0.999963
chr1:41712959-41716258	85.4397	0.142312	0.262577	0.541982	0.587831	0.999963
chr1:41734896-41736771	46.7472	0.219864	0.262681	0.836997	0.402594	0.999963
chr1:41741442-41742982	46.1822	0.0492905	0.263241	0.187245	0.851469	0.999963
chr1:41747877-41750636	67.6765	0.0988406	0.25457	0.388266	0.697819	0.999963
chr1:41783017-41783993	14.3319	0.151833	0.273885	0.554369	0.579326	0.999963
chr1:41862435-41863762	30.9106	0.0114933	0.269917	0.0425807	0.966036	0.999963
chr1:41871144-41872018	25.1064	0.122347	0.274177	0.446233	0.655429	0.999963
chr1:41917217-41919698	85.466	0.160919	0.247204	0.650956	0.515075	0.999963
chr1:41926314-41926907	12.8449	0.062284	0.272382	0.228664	0.81913	0.999963
chr1:42046458-42046852	9.17543	0.0922729	0.257263	0.358671	0.719841	0.999963
chr1:42047100-42047745	16.6085	0.112688	0.275817	0.408562	0.682861	0.999963
chr1:42143884-42144707	19.5597	0.108977	0.275509	0.395547	0.692439	0.999963
chr1:42322436-42323627	23.4406	0.0905365	0.275229	0.328949	0.742194	0.999963
chr1:42331995-42332397	9.13707	-0.0329947	0.26612	-0.123984	0.901328	0.999963
chr1:42332571-42336620	142.01	0.151258	0.231599	0.653104	0.513689	0.999963
chr1:42340206-42341926	59.118	0.0732003	0.257225	0.284577	0.775968	0.999963
chr1:42346385-42351051	215.155	-0.0662963	0.220064	-0.301258	0.763217	0.999963
chr1:42379710-42381666	45.9572	0.421645	0.266937	1.57957	0.114205	0.999963
chr1:42381684-42382650	18.286	0.0842742	0.276062	0.305272	0.760159	0.999963
chr1:42414339-42427791	868.219	-0.221607	0.202308	-1.09539	0.273346	0.999963
chr1:42455291-42457303	50.5316	0.333054	0.275268	1.20993	0.226306	0.999963
chr1:42460005-42461334	27.8938	0.191661	0.269554	0.71103	0.477066	0.999963
chr1:42461943-42465160	133.032	-0.1009	0.230905	-0.436978	0.662127	0.999963
chr1:42473273-42474174	16.7906	-0.151367	0.276034	-0.548363	0.583443	0.999963
chr1:42474547-42476559	41.4386	-0.211178	0.26583	-0.794409	0.426957	0.999963
chr1:42479356-42479744	11.6588	0.0348553	0.271543	0.12836	0.897864	0.999963
chr1:42657413-42659066	48.6683	0.0582262	0.264142	0.220435	0.825532	0.999963
chr1:42680345-42686235	174.63	0.0471741	0.221006	0.213451	0.830975	0.999963
chr1:42764766-42768745	119.241	0.159665	0.25355	0.629719	0.528879	0.999963
chr1:42812663-42813337	15.462	-0.0785658	0.26997	-0.291017	0.771038	0.999963
chr1:42815290-42818057	137.109	-0.10797	0.229496	-0.470466	0.638022	0.999963
chr1:42846624-42847545	17.3549	-0.0262426	0.275604	-0.0952186	0.924141	0.999963
chr1:42922861-42925986	145.497	-0.0693058	0.243393	-0.284748	0.775837	0.999963
chr1:42957395-42959733	56.6836	0.0952382	0.275983	0.345087	0.730029	0.999963
chr1:43026925-43029495	83.8775	0.0067942	0.256624	0.0264753	0.978878	0.999963
chr1:43128068-43130984	75.6634	0.120727	0.243537	0.495724	0.620089	0.999963
chr1:43131278-43132470	40.7288	0.0565599	0.266128	0.212529	0.831695	0.999963
chr1:43358164-43358646	17.0374	0.197473	0.276032	0.715397	0.474364	0.999963
chr1:43368230-43368766	12.1119	0.249396	0.271936	0.917111	0.359084	0.999963
chr1:43381677-43382184	10.4819	-0.14871	0.261816	-0.567994	0.570039	0.999963
chr1:43382483-43383212	17.7776	-0.339069	0.275926	-1.22884	0.219131	0.999963
chr1:43388857-43390906	62.2165	0.0757837	0.259658	0.29186	0.770394	0.999963
chr1:43453383-43454682	40.1229	-0.0396775	0.266257	-0.14902	0.881538	0.999963
chr1:43522147-43522669	11.4673	0.27892	0.270894	1.02963	0.303185	0.999963
chr1:43530417-43531183	14.94	0.118711	0.273911	0.433391	0.664731	0.999963
chr1:43558116-43559386	32.5688	0.177069	0.27295	0.648725	0.516516	0.999963
chr1:43563916-43565593	22.0822	0.236852	0.268921	0.88075	0.378453	0.999963
chr1:43584970-43585749	14.8879	0.141357	0.270075	0.523398	0.600697	0.999963
chr1:43649354-43652173	102.784	0.108517	0.25505	0.425473	0.670492	0.999963
chr1:43706888-43708585	28.1778	0.0218435	0.275089	0.0794052	0.93671	0.999963
chr1:43765869-43766989	24.6409	0.282262	0.273063	1.03369	0.301281	0.999963
chr1:43834919-43836512	28.7221	-0.221726	0.271402	-0.816968	0.413947	0.999963
chr1:43945924-43947725	56.5378	0.279777	0.276024	1.0136	0.310775	0.999963
chr1:43947866-43948545	10.732	0.202223	0.263861	0.766398	0.443439	0.999963
chr1:43951789-43954342	99.0724	0.168921	0.252809	0.668177	0.50402	0.999963
chr1:43974027-43976090	56.7232	0.190247	0.275991	0.689324	0.490619	0.999963
chr1:43978508-43979085	10.7142	0.00324888	0.263651	0.0123227	0.990168	0.999963
chr1:44028936-44031336	64.1321	0.218581	0.27358	0.798965	0.424311	0.999963
chr1:44031387-44032175	11.7304	0.148772	0.26804	0.555037	0.57887	0.999963
chr1:44036141-44036641	9.4021	-0.0683206	0.260242	-0.262527	0.792915	0.999963
chr1:44151185-44151870	17.5083	0.377712	0.276042	1.36831	0.171214	0.999963
chr1:44212741-44214379	45.2182	-0.203134	0.263872	-0.769818	0.441408	0.999963
chr1:44251644-44252923	19.4624	-0.0246018	0.272679	-0.0902226	0.92811	0.999963
chr1:44260958-44262065	26.2174	0.103441	0.27533	0.375697	0.707142	0.999963
chr1:44296290-44298222	55.5276	0.10461	0.261991	0.399289	0.68968	0.999963
chr1:44354518-44355174	14.1011	0.0717781	0.272559	0.263349	0.792282	0.999963
chr1:44355518-44355862	9.85221	0.292679	0.262946	1.11308	0.265676	0.999963
chr1:44484944-44486147	23.511	-0.0999991	0.27318	-0.366056	0.714324	0.999963
chr1:44501383-44502657	30.5391	0.0837398	0.270451	0.30963	0.756842	0.999963
chr1:44524354-44525144	19.5028	-0.0921881	0.275411	-0.334729	0.737829	0.999963
chr1:44536226-44536840	12.8986	0.00680044	0.273333	0.0248797	0.980151	0.999963
chr1:44596952-44597376	10.8797	-0.0204186	0.269564	-0.0757468	0.939621	0.999963
chr1:44631161-44633429	62.3186	0.0172504	0.26874	0.06419	0.948819	0.999963
chr1:44673176-44675522	61.9468	0.206187	0.269782	0.764273	0.444704	0.999963
chr1:44730675-44731363	17.4873	-0.346098	0.27604	-1.2538	0.209916	0.999963
chr1:44739130-44740321	31.367	-0.177685	0.272518	-0.652014	0.514392	0.999963
chr1:44774717-44776817	92.5054	0.180266	0.269422	0.669083	0.503443	0.999963
chr1:44798353-44803533	143.344	0.164451	0.267053	0.615799	0.538027	0.999963
chr1:44808145-44809511	20.0662	0.153612	0.272104	0.564536	0.572389	0.999963
chr1:44813966-44814281	11.355	-0.0645838	0.270218	-0.239006	0.811101	0.999963
chr1:44842359-44843362	14.3038	0.412598	0.266721	1.54693	0.121881	0.999963
chr1:44986418-44987025	10.6623	-0.010516	0.268173	-0.0392135	0.96872	0.999963
chr1:45010640-45012786	68.0595	0.00462361	0.262778	0.0175951	0.985962	0.999963
chr1:45102629-45104669	40.016	-0.236351	0.268635	-0.87982	0.378957	0.999963
chr1:45147859-45148566	13.8446	-0.0865448	0.27514	-0.314549	0.753104	0.999963
chr1:45158757-45159074	10.5098	0.156724	0.266223	0.588697	0.556065	0.999963
chr1:45202617-45203611	23.9359	0.111616	0.276068	0.404305	0.685989	0.999963
chr1:45204157-45206467	72.8918	-0.246035	0.248537	-0.989932	0.322207	0.999963
chr1:45206756-45207296	10.6083	-0.379552	0.271461	-1.39818	0.162059	0.999963
chr1:45303146-45304660	37.4914	0.246407	0.273821	0.899885	0.368181	0.999963
chr1:45338955-45341191	91.963	0.0251584	0.270651	0.0929549	0.925939	0.999963
chr1:45500350-45500664	7.85493	0.154988	0.257155	0.602703	0.546707	0.999963
chr1:45521266-45522507	26.9974	0.127365	0.276067	0.461355	0.644544	0.999963
chr1:45549899-45551829	67.2396	0.0500935	0.251288	0.199347	0.841991	0.999963
chr1:45583062-45585907	87.5295	0.0448463	0.264822	0.169345	0.865525	0.999963
chr1:45685325-45688770	157.395	-0.0801764	0.24078	-0.332987	0.739144	0.999963
chr1:45749788-45751583	90.1982	-0.0286391	0.257308	-0.111302	0.911377	0.999963
chr1:45802821-45805405	59.3121	-0.0563943	0.259852	-0.217025	0.828189	0.999963
chr1:45862956-45865038	59.5086	-0.151969	0.251179	-0.605024	0.545163	0.999963
chr1:45910788-45911401	12.292	0.0214087	0.270653	0.0791001	0.936953	0.999963
chr1:46111996-46112523	11.3825	0.0378092	0.264544	0.142922	0.886352	0.999963
chr1:46129089-46135202	531.749	-0.299598	0.20874	-1.43527	0.151211	0.999963
chr1:46135313-46135824	13.1597	0.0924052	0.27366	0.337664	0.735616	0.999963
chr1:46172647-46174479	55.9733	0.0788966	0.258516	0.30519	0.760221	0.999963
chr1:46198018-46199055	24.0461	0.426775	0.275843	1.54717	0.121822	0.999963
chr1:46218988-46221498	72.763	0.103507	0.255784	0.404665	0.685724	0.999963
chr1:46300192-46304930	171.655	0.157712	0.261568	0.602948	0.546544	0.999963
chr1:46338972-46341826	157.715	-0.00287641	0.244699	-0.0117549	0.990621	0.999963
chr1:46392637-46394028	28.2468	0.14577	0.273772	0.532448	0.594416	0.999963
chr1:46394557-46395042	12.6851	0.112479	0.273974	0.410549	0.681404	0.999963
chr1:46397872-46400759	117.647	0.13879	0.2334	0.594643	0.552082	0.999963
chr1:46406744-46407176	7.07145	0.176132	0.246787	0.7137	0.475413	0.999963
chr1:46549151-46551239	61.5978	0.145721	0.271926	0.535884	0.592039	0.999963
chr1:46557135-46559775	82.8865	-0.0780292	0.253563	-0.307731	0.758287	0.999963
chr1:46603676-46604140	10.273	0.294081	0.263939	1.1142	0.265193	0.999963
chr1:46667128-46668819	41.6605	0.168723	0.272598	0.618945	0.535952	0.999963
chr1:46718209-46719404	25.7919	0.0662338	0.276068	0.239919	0.810393	0.999963
chr1:46719460-46719846	7.14012	-0.326673	0.252035	-1.29614	0.194926	0.999963
chr1:47023063-47025309	79.1987	0.140005	0.250714	0.558426	0.576553	0.999963
chr1:47313612-47314094	12.7823	-0.159425	0.27296	-0.584059	0.55918	0.999963
chr1:47314496-47314990	17.9456	-0.116616	0.275812	-0.422809	0.672435	0.999963
chr1:47323865-47324477	11.9208	0.469959	0.272363	1.72549	0.0844394	0.999963
chr1:47331730-47335356	208.01	-0.0513306	0.237306	-0.216306	0.828749	0.999963
chr1:47659126-47660613	33.2521	-0.287366	0.268853	-1.06886	0.285133	0.999963
chr1:47695983-47697670	37.6277	-0.139307	0.265168	-0.525353	0.599338	0.999963
chr1:47706032-47706547	14.3485	-0.028347	0.275739	-0.102804	0.918119	0.999963
chr1:47830386-47830971	13.8084	-0.162576	0.275488	-0.590138	0.555098	0.999963
chr1:48182602-48183172	12.0742	-0.0172066	0.274137	-0.0627666	0.949952	0.999963
chr1:48471109-48471902	10.1271	0.116791	0.260471	0.448383	0.653877	0.999963
chr1:48472364-48473375	36.9758	0.447814	0.261935	1.70964	0.0873325	0.999963
chr1:48609855-48612458	88.8609	0.0367872	0.241751	0.15217	0.879053	0.999963
chr1:48626090-48629461	119.058	0.19285	0.231219	0.834054	0.40425	0.999963
chr1:48746191-48748040	52.234	-0.157985	0.25897	-0.610051	0.541828	0.999963
chr1:48775551-48778131	95.5127	0.00245852	0.26396	0.00931399	0.992569	0.999963
chr1:48875192-48876932	29.8119	0.137642	0.268411	0.512804	0.608089	0.999963
chr1:48947087-48949746	61.5093	-0.352897	0.249571	-1.41402	0.157357	0.999963
chr1:50102737-50103953	20.8078	0.0796781	0.275988	0.288702	0.77281	0.999963
chr1:50104065-50115532	612.824	-0.256552	0.20201	-1.26999	0.204088	0.999963
chr1:50131359-50133587	72.0086	-0.352752	0.252704	-1.39591	0.162741	0.999963
chr1:50135845-50136584	15.9337	0.434646	0.275829	1.57578	0.115076	0.999963
chr1:50137970-50142145	130.961	-0.0535746	0.230054	-0.232878	0.815856	0.999963
chr1:50151061-50153544	75.7063	-0.0403641	0.241983	-0.166806	0.867523	0.999963
chr1:50160663-50161128	9.74474	-0.119709	0.267111	-0.448161	0.654037	0.999963
chr1:50192629-50193227	16.2434	0.167158	0.276048	0.605539	0.544821	0.999963
chr1:50196017-50197348	37.0646	-0.201947	0.266449	-0.757918	0.4485	0.999963
chr1:50197657-50198530	23.8758	-0.104158	0.275353	-0.37827	0.70523	0.999963
chr1:50201710-50202695	14.3835	0.147438	0.264867	0.556647	0.577769	0.999963
chr1:50205325-50207156	45.4241	0.0843767	0.257629	0.327512	0.74328	0.999963
chr1:50251025-50253199	34.9549	0.0167499	0.27329	0.0612899	0.951128	0.999963
chr1:50277133-50279758	59.4926	0.162316	0.254902	0.636781	0.524268	0.999963
chr1:50569155-50571359	43.5466	-0.11025	0.268082	-0.411257	0.680884	0.999963
chr1:50631247-50631831	12.3925	-0.0736871	0.27413	-0.268803	0.788081	0.999963
chr1:50631897-50635004	105.22	-0.114215	0.252698	-0.451982	0.651282	0.999963
chr1:50661100-50662477	30.3814	-0.186156	0.275888	-0.67475	0.499834	0.999963
chr1:50667233-50669094	36.7417	-0.0576818	0.263888	-0.218585	0.826974	0.999963
chr1:50698930-50702029	79.2723	-0.178981	0.258714	-0.691813	0.489055	0.999963
chr1:50958843-50961308	53.3958	0.177243	0.265587	0.667362	0.504541	0.999963
chr1:50967697-50970593	58.4505	-0.0801374	0.269921	-0.296892	0.766549	0.999963
chr1:51101514-51102058	11.4536	0.124548	0.26724	0.466053	0.641178	0.999963
chr1:51102267-51102803	12.3316	0.231608	0.265063	0.873788	0.382234	0.999963
chr1:51234828-51238678	226.443	0.0663084	0.223648	0.296486	0.766859	0.999963
chr1:51260416-51261360	20.3616	0.0659705	0.27562	0.239353	0.810832	0.999963
chr1:51363367-51363729	10.7092	0.0556508	0.2679	0.207729	0.83544	0.999963
chr1:51363983-51364430	10.6355	-0.0300075	0.271239	-0.110631	0.911909	0.999963
chr1:51411142-51411725	14.6718	0.273911	0.274156	0.999107	0.317743	0.999963
chr1:51420839-51424181	190.493	-0.301883	0.236699	-1.27539	0.202172	0.999963
chr1:51616046-51617913	113.699	-0.215982	0.237049	-0.911127	0.362229	0.999963
chr1:51668821-51671026	60.5095	0.00400466	0.252026	0.0158898	0.987322	0.999963
chr1:51729158-51730100	12.2314	0.136123	0.26761	0.508662	0.610989	0.999963
chr1:51877365-51880275	212.995	-0.0861716	0.245272	-0.351331	0.72534	0.999963
chr1:51966082-51966659	13.7875	-0.259819	0.274697	-0.945841	0.34423	0.999963
chr1:52032376-52035313	194.032	-0.156142	0.216882	-0.719938	0.471563	0.999963
chr1:52054462-52060172	300.088	-0.257772	0.215468	-1.19634	0.231566	0.999963
chr1:52071036-52071281	6.37486	-0.163486	0.249188	-0.656074	0.511777	0.999963
chr1:52075943-52078068	53.084	-0.196286	0.256489	-0.76528	0.444105	0.999963
chr1:52140820-52143670	101.868	0.144898	0.256206	0.565552	0.571698	0.999963
chr1:52350405-52351604	23.6008	-0.0814471	0.273716	-0.29756	0.766039	0.999963
chr1:52364989-52366587	38.856	-0.0420028	0.275734	-0.152331	0.878926	0.999963
chr1:52368155-52369338	29.2677	-0.0981254	0.268871	-0.364954	0.715146	0.999963
chr1:52403806-52405713	92.0414	-0.113341	0.244306	-0.463929	0.642699	0.999963
chr1:52426764-52427520	17.6204	0.1347	0.275211	0.489444	0.624528	0.999963
chr1:52551051-52555769	222.277	-0.0647546	0.236725	-0.273543	0.784436	0.999963
chr1:52590527-52590885	9.01697	-0.0209405	0.266926	-0.0784505	0.93747	0.999963
chr1:52601909-52603179	15.8542	0.120879	0.263745	0.458317	0.646724	0.999963
chr1:52659447-52664676	195.541	0.0657265	0.233185	0.281864	0.778048	0.999963
chr1:52665122-52665805	14.7705	0.03566	0.274963	0.12969	0.896811	0.999963
chr1:52685967-52686349	9.39603	-0.0520599	0.263868	-0.197295	0.843597	0.999963
chr1:52697850-52699452	54.6461	0.398664	0.266492	1.49597	0.134662	0.999963
chr1:52703143-52703877	13.6591	0.423569	0.269873	1.56951	0.116529	0.999963
chr1:52725730-52727997	99.2577	0.101746	0.247344	0.411356	0.680811	0.999963
chr1:52763226-52764070	19.8176	-0.0880551	0.275943	-0.319106	0.749646	0.999963
chr1:52926955-52928062	20.9524	0.349924	0.275084	1.27206	0.203351	0.999963
chr1:52954446-52956178	37.1089	-0.123958	0.269184	-0.460495	0.645161	0.999963
chr1:53014243-53015846	42.5758	-0.180068	0.26054	-0.691137	0.48948	0.999963
chr1:53049309-53050029	15.6411	0.127242	0.275948	0.461108	0.644721	0.999963
chr1:53195983-53197462	41.8619	0.0674674	0.260809	0.258685	0.795878	0.999963
chr1:53218996-53221328	133.01	0.217245	0.23586	0.921075	0.357011	0.999963
chr1:53237639-53239419	69.4425	0.160741	0.260076	0.618055	0.536539	0.999963
chr1:53277911-53280091	36.4937	0.286997	0.271077	1.05873	0.289723	0.999963
chr1:53286672-53289872	128.601	0.104208	0.262012	0.397723	0.690834	0.999963
chr1:53294459-53297733	66.034	0.191052	0.270925	0.705183	0.480696	0.999963
chr1:53302992-53305168	46.7455	0.0498522	0.267966	0.186039	0.852414	0.999963
chr1:53307865-53309062	20.7897	0.124969	0.272757	0.458169	0.646831	0.999963
chr1:53326287-53327965	42.9511	0.247044	0.276067	0.894868	0.370858	0.999963
chr1:53328228-53328689	11.0136	0.0692852	0.264371	0.262075	0.793263	0.999963
chr1:53338038-53338955	22.3976	0.428226	0.275042	1.55695	0.119483	0.999963
chr1:53415998-53420818	123.408	-0.228136	0.229183	-0.995431	0.319527	0.999963
chr1:53430248-53430990	15.6585	0.0489435	0.275961	0.177357	0.859228	0.999963
chr1:53503200-53504019	13.4909	0.224136	0.266149	0.842146	0.399707	0.999963
chr1:53563786-53564443	15.2114	0.283812	0.273623	1.03724	0.299626	0.999963
chr1:53571688-53573831	55.2402	0.123014	0.25667	0.479268	0.631748	0.999963
chr1:53590412-53591536	29.9194	0.332018	0.271742	1.22181	0.221778	0.999963
chr1:53837448-53839371	54.3408	-0.031593	0.270036	-0.116996	0.906864	0.999963
chr1:53870639-53873165	71.2029	-0.240894	0.251701	-0.957065	0.338534	0.999963
chr1:53888602-53890796	53.976	0.0256955	0.252499	0.101765	0.918943	0.999963
chr1:53944775-53945711	25.8478	0.289601	0.274922	1.05339	0.292162	0.999963
chr1:53946049-53947149	19.9969	0.27257	0.274783	0.991945	0.321224	0.999963
chr1:53947934-53948683	11.8585	-0.387395	0.272306	-1.42265	0.154838	0.999963
chr1:53949335-53950049	13.6864	-0.0677003	0.274966	-0.246214	0.805517	0.999963
chr1:54046709-54047431	14.7326	-0.217791	0.273988	-0.794892	0.426676	0.999963
chr1:54048786-54049460	15.157	-0.196813	0.273987	-0.718328	0.472555	0.999963
chr1:54050980-54053258	113.745	-0.0480671	0.248858	-0.193151	0.846841	0.999963
chr1:54053583-54054586	38.8027	0.0221874	0.274036	0.0809654	0.935469	0.999963
chr1:54173204-54173557	8.20016	0.0639192	0.255649	0.250027	0.802567	0.999963
chr1:54173732-54174560	17.3545	0.256473	0.27369	0.937092	0.348711	0.999963
chr1:54199480-54201388	42.028	0.125772	0.270358	0.465203	0.641786	0.999963
chr1:54272270-54273071	17.4403	0.0765191	0.275105	0.278145	0.780901	0.999963
chr1:54273366-54273896	10.3719	0.0510294	0.25305	0.201657	0.840185	0.999963
chr1:54309315-54310518	31.7703	0.182932	0.270205	0.677012	0.498399	0.999963
chr1:54314385-54315195	13.1615	0.178667	0.273963	0.652155	0.514301	0.999963
chr1:54324170-54330335	127.538	-0.0156211	0.250313	-0.0624065	0.950239	0.999963
chr1:54335115-54335399	9.56873	0.134139	0.26678	0.502807	0.6151	0.999963
chr1:54355667-54356472	13.1682	0.0410454	0.270771	0.151587	0.879512	0.999963
chr1:54356773-54357295	12.4258	0.346194	0.273548	1.26557	0.205668	0.999963
chr1:54377833-54379773	44.6696	-0.0719424	0.272845	-0.263675	0.79203	0.999963
chr1:54404474-54405709	20.323	0.0299509	0.271052	0.110499	0.912014	0.999963
chr1:54406462-54409666	127.05	0.0425679	0.238462	0.17851	0.858322	0.999963
chr1:54415139-54416224	20.1479	0.280459	0.275931	1.01641	0.309435	0.999963
chr1:54465504-54465780	5.54816	0.0629014	0.234562	0.268165	0.788572	0.999963
chr1:54474015-54477584	82.0727	0.174762	0.262552	0.665627	0.505649	0.999963
chr1:54486663-54490260	117.918	0.0444874	0.260452	0.170808	0.864375	0.999963
chr1:54490694-54491523	18.3766	-0.0704468	0.270223	-0.260699	0.794324	0.999963
chr1:54517065-54518074	22.2411	0.100564	0.274109	0.366877	0.71371	0.999963
chr1:54680140-54683038	78.657	0.0215579	0.249959	0.0862458	0.931271	0.999963
chr1:54715032-54716511	33.5695	-0.0749277	0.274712	-0.27275	0.785045	0.999963
chr1:54764044-54764465	7.82063	-0.0039963	0.235248	-0.0169876	0.986446	0.999963
chr1:54764824-54765496	35.7201	-0.348149	0.267255	-1.30268	0.192683	0.999963
chr1:54857454-54857773	8.33147	-0.077743	0.266567	-0.291645	0.770558	0.999963
chr1:54884621-54889009	110.323	0.213353	0.263748	0.808927	0.418557	0.999963
chr1:54927113-54928452	31.0272	-0.00705422	0.267277	-0.0263929	0.978944	0.999963
chr1:55067460-55068517	19.4573	-0.209407	0.276036	-0.758621	0.448079	0.999963
chr1:55170807-55172856	62.5118	-0.199776	0.250919	-0.796177	0.425929	0.999963
chr1:55173193-55174092	18.8679	0.006439	0.275992	0.0233304	0.981387	0.999963
chr1:55187206-55187841	14.2774	0.0697778	0.275127	0.253621	0.799789	0.999963
chr1:55200498-55201501	24.9268	0.150489	0.27559	0.546063	0.585023	0.999963
chr1:55201651-55202296	15.5275	0.027806	0.275355	0.100982	0.919565	0.999963
chr1:55211350-55213837	52.8537	-0.0497637	0.256136	-0.194286	0.845952	0.999963
chr1:55213855-55216388	65.3604	0.104514	0.271986	0.384261	0.700785	0.999963
chr1:55326557-55326953	11.5809	0.229507	0.27222	0.843095	0.399176	0.999963
chr1:55327245-55328197	20.3275	-0.160369	0.275652	-0.581781	0.560714	0.999963
chr1:55584514-55584969	10.0659	-0.105845	0.268301	-0.394501	0.693211	0.999963
chr1:55585194-55585735	13.1157	-0.187478	0.274376	-0.68329	0.494424	0.999963
chr1:55969331-55969609	10.0723	0.377456	0.265233	1.42311	0.154704	0.999963
chr1:55992770-55994891	56.3744	0.218243	0.251211	0.868762	0.384977	0.999963
chr1:56051676-56052003	9.21674	-0.088693	0.265066	-0.334607	0.737922	0.999963
chr1:56052360-56053238	17.5992	0.0763586	0.276069	0.276593	0.782093	0.999963
chr1:56185893-56186262	13.425	0.368274	0.27168	1.35554	0.175245	0.999963
chr1:56228221-56229465	27.4291	0.0942274	0.270921	0.347805	0.727987	0.999963
chr1:56395790-56397387	30.7889	0.0254166	0.269827	0.0941961	0.924953	0.999963
chr1:56435109-56438744	114.484	-0.275575	0.236547	-1.16499	0.244023	0.999963
chr1:56476927-56478047	19.2848	0.232434	0.269705	0.861809	0.388793	0.999963
chr1:56510365-56511061	16.4278	0.346929	0.274505	1.26384	0.206289	0.999963
chr1:56527575-56528861	27.8833	0.00393979	0.272092	0.0144797	0.988447	0.999963
chr1:56549756-56553808	83.9251	-0.139324	0.242937	-0.573499	0.566307	0.999963
chr1:56557528-56558311	17.7313	0.0052061	0.276063	0.0188584	0.984954	0.999963
chr1:56561095-56566186	186.279	-0.282316	0.219658	-1.28525	0.198704	0.999963
chr1:56566484-56567446	28.7895	-0.417978	0.270403	-1.54576	0.122163	0.999963
chr1:56574886-56577054	42.7992	0.0208689	0.268236	0.0778006	0.937987	0.999963
chr1:56578827-56579347	9.37872	0.0148876	0.255563	0.0582539	0.953546	0.999963
chr1:56579737-56580155	9.9076	-0.155984	0.267766	-0.582538	0.560204	0.999963
chr1:56644610-56646236	31.8778	0.156321	0.275463	0.567485	0.570385	0.999963
chr1:56920932-56921476	14.2858	-0.030292	0.27564	-0.109897	0.912491	0.999963
chr1:57045961-57047053	24.7056	0.13173	0.274428	0.480018	0.631215	0.999963
chr1:57064625-57065282	15.3332	-0.127004	0.274179	-0.463216	0.643209	0.999963
chr1:57089743-57090670	23.0432	0.0527044	0.273397	0.192776	0.847134	0.999963
chr1:57254084-57254576	10.2235	-0.0570551	0.270058	-0.21127	0.832676	0.999963
chr1:57258601-57259580	18.1547	-0.0339239	0.276059	-0.122886	0.902197	0.999963
chr1:57264308-57266672	73.3857	0.165294	0.243079	0.680001	0.496504	0.999963
chr1:57380668-57381280	13.8081	0.497286	0.274495	1.81164	0.0700419	0.999963
chr1:57599823-57600618	14.8066	0.202501	0.272739	0.742473	0.457801	0.999963
chr1:57614123-57614782	12.3976	0.144794	0.268075	0.540124	0.589111	0.999963
chr1:57820345-57821046	15.0472	0.0192326	0.275655	0.0697703	0.944376	0.999963
chr1:57826549-57827368	16.9804	-0.119963	0.276034	-0.434596	0.663856	0.999963
chr1:57881331-57882450	34.9838	0.133597	0.266034	0.502181	0.615541	0.999963
chr1:57883415-57884102	15.9298	0.270375	0.275792	0.980358	0.326909	0.999963
chr1:57908644-57909314	15.4488	-0.0270778	0.275644	-0.0982347	0.921746	0.999963
chr1:58006663-58007522	21.0239	0.022779	0.275331	0.0827334	0.934064	0.999963
chr1:58089431-58090159	17.8778	0.252403	0.275998	0.914509	0.36045	0.999963
chr1:58250079-58250448	6.78122	0.272598	0.238511	1.14292	0.253074	0.999963
chr1:58544264-58546534	91.9523	-0.0626456	0.239415	-0.261662	0.793582	0.999963
chr1:58546931-58547359	14.8626	0.0269631	0.275945	0.0977117	0.922161	0.999963
chr1:58698949-58700132	34.5934	0.11088	0.269994	0.410674	0.681311	0.999963
chr1:58748251-58749220	19.5593	-0.206347	0.275443	-0.749148	0.453768	0.999963
chr1:58781089-58781623	17.2034	-0.165614	0.276063	-0.599913	0.548564	0.999963
chr1:58781834-58785051	79.0822	0.216187	0.274718	0.786943	0.431315	0.999963
chr1:58855126-58856170	26.5685	-0.0108855	0.27417	-0.0397035	0.968329	0.999963
chr1:58874546-58874785	7.47275	-0.161725	0.259101	-0.624179	0.53251	0.999963
chr1:58875152-58875636	11.9056	0.222635	0.272664	0.816518	0.414204	0.999963
chr1:58996074-58996749	12.6422	-0.0946841	0.267831	-0.353521	0.723698	0.999963
chr1:59077982-59078524	9.3795	0.142845	0.263983	0.541115	0.588428	0.999963
chr1:59295928-59297646	61.3063	-0.0140775	0.264847	-0.0531533	0.95761	0.999963
chr1:59445391-59447467	54.712	-0.279124	0.257416	-1.08433	0.278218	0.999963
chr1:59513622-59513853	8.37915	0.243009	0.261478	0.929363	0.352701	0.999963
chr1:59641094-59642658	32.8419	-0.161537	0.266489	-0.606166	0.544405	0.999963
chr1:59658881-59661341	67.1556	-0.0214631	0.252454	-0.0850181	0.932247	0.999963
chr1:59663136-59665451	75.1196	-0.117145	0.250111	-0.468373	0.639518	0.999963
chr1:59815001-59815852	22.1604	0.254066	0.275697	0.921538	0.35677	0.999963
chr1:59902061-59904262	72.0242	0.0665165	0.24278	0.273978	0.784101	0.999963
chr1:60090895-60091275	8.84638	-0.0411033	0.263582	-0.155941	0.876079	0.999963
chr1:60141416-60142347	18.2703	-0.130379	0.27556	-0.473143	0.636111	0.999963
chr1:60148372-60149606	19.8143	-0.0793517	0.275192	-0.28835	0.773079	0.999963
chr1:60199759-60200143	7.33357	0.224486	0.231266	0.970686	0.331705	0.999963
chr1:60212353-60214755	93.847	0.135095	0.245122	0.551132	0.581543	0.999963
chr1:60220719-60224223	97.3119	-0.306318	0.234659	-1.30538	0.191765	0.999963
chr1:60228030-60228572	11.7846	0.0670954	0.269257	0.249188	0.803216	0.999963
chr1:60402571-60403178	12.235	0.188592	0.270604	0.69693	0.485847	0.999963
chr1:60435536-60436183	14.063	-0.19085	0.275347	-0.693126	0.488231	0.999963
chr1:60436486-60436950	11.6703	-0.0641335	0.271919	-0.235855	0.813545	0.999963
chr1:60502486-60504465	43.1421	-0.0607128	0.2602	-0.233331	0.815504	0.999963
chr1:60621492-60621923	11.779	0.0530594	0.272079	0.195015	0.845382	0.999963
chr1:60696039-60696574	10.1441	-0.287461	0.268377	-1.07111	0.284121	0.999963
chr1:60745986-60746530	16.0271	-0.20332	0.27592	-0.736882	0.461194	0.999963
chr1:60746899-60747253	10.6102	-0.0548541	0.27202	-0.201655	0.840187	0.999963
chr1:60865908-60869261	88.4354	-0.442216	0.241982	-1.82747	0.0676287	0.999963
chr1:60934478-60936709	48.3745	-0.363373	0.258576	-1.40529	0.159936	0.999963
chr1:60936991-60937640	13.7182	0.16801	0.272888	0.615674	0.538109	0.999963
chr1:60969823-60970906	32.5898	-0.080745	0.26624	-0.303279	0.761678	0.999963
chr1:61006295-61007035	19.912	-0.0411599	0.275353	-0.149481	0.881174	0.999963
chr1:61049774-61050782	15.5324	0.224253	0.261319	0.858157	0.390806	0.999963
chr1:61057087-61057669	20.6904	0.0386842	0.275828	0.140248	0.888464	0.999963
chr1:61075960-61077944	72.793	-0.336065	0.243566	-1.37977	0.167657	0.999963
chr1:61078240-61082018	124.232	-0.343254	0.229042	-1.49865	0.133964	0.999963
chr1:61082500-61083595	19.108	0.050186	0.271474	0.184865	0.853335	0.999963
chr1:61083895-61085744	45.8287	-0.0877813	0.268525	-0.326902	0.743742	0.999963
chr1:61093995-61094724	14.7307	-0.150761	0.275233	-0.547756	0.583859	0.999963
chr1:61102119-61103078	20.1357	0.359414	0.276068	1.3019	0.19295	0.999963
chr1:61103328-61103626	8.09407	0.250375	0.261345	0.958024	0.338051	0.999963
chr1:61104485-61104871	11.5794	-0.0783458	0.27386	-0.28608	0.774817	0.999963
chr1:61108433-61109685	32.4671	-0.0807152	0.27477	-0.293755	0.768945	0.999963
chr1:61110193-61113140	88.7937	-0.11519	0.255771	-0.450363	0.652449	0.999963
chr1:61120435-61121666	28.4572	-0.0434813	0.27145	-0.160182	0.872738	0.999963
chr1:61124580-61125725	19.3401	-0.138057	0.275448	-0.501207	0.616225	0.999963
chr1:61131174-61133838	65.9622	-0.129707	0.260389	-0.498127	0.618394	0.999963
chr1:61180777-61182761	44.6707	-0.314061	0.264532	-1.18723	0.235135	0.999963
chr1:61184324-61185150	19.6861	-0.1182	0.275508	-0.429028	0.667903	0.999963
chr1:61190194-61192351	51.5189	-0.208601	0.25613	-0.814435	0.415396	0.999963
chr1:61192988-61193760	17.2837	0.210538	0.272205	0.773452	0.439255	0.999963
chr1:61220223-61223832	119.439	-0.215485	0.254343	-0.847223	0.396871	0.999963
chr1:61226679-61227311	14.6354	-0.00484385	0.275518	-0.0175809	0.985973	0.999963
chr1:61228576-61229890	22.2604	0.145946	0.273797	0.533043	0.594004	0.999963
chr1:61231589-61232059	9.43801	0.458535	0.265692	1.72582	0.0843805	0.999963
chr1:61239083-61241374	58.5055	-0.00288597	0.264587	-0.0109075	0.991297	0.999963
chr1:61243677-61244215	10.0286	0.151956	0.2567	0.591959	0.553878	0.999963
chr1:61268172-61270614	56.2942	-0.0321753	0.256438	-0.12547	0.900151	0.999963
chr1:61301378-61301765	10.311	0.331141	0.263966	1.25448	0.209666	0.999963
chr1:61335928-61339691	104.733	-0.277451	0.235198	-1.17965	0.238139	0.999963
chr1:61342481-61345207	82.2476	-0.183601	0.242686	-0.756536	0.449328	0.999963
chr1:61443518-61444321	22.8543	0.186499	0.274991	0.678202	0.497644	0.999963
chr1:61452531-61453135	18.3901	-0.0483464	0.275824	-0.17528	0.86086	0.999963
chr1:61453511-61455240	52.6985	-0.426486	0.255881	-1.66674	0.0955668	0.999963
chr1:61455380-61456390	19.3397	-0.371802	0.276008	-1.34707	0.177958	0.999963
chr1:61459794-61460064	10.2348	0.116373	0.269725	0.43145	0.666141	0.999963
chr1:61523438-61524499	22.942	-0.00371883	0.274288	-0.0135581	0.989183	0.999963
chr1:61527449-61527899	11.846	0.108851	0.268097	0.406015	0.684731	0.999963
chr1:61724461-61726040	72.8676	-0.00546727	0.254332	-0.0214966	0.98285	0.999963
chr1:61741564-61743844	56.7591	0.0132485	0.260308	0.0508954	0.959409	0.999963
chr1:61852479-61852917	10.46	0.12022	0.26988	0.445457	0.65599	0.999963
chr1:61853361-61853874	11.1328	0.194119	0.267756	0.724986	0.468461	0.999963
chr1:61951599-61953009	28.0149	-0.192142	0.271447	-0.707844	0.479042	0.999963
chr1:62064112-62065689	44.9601	-0.241741	0.260453	-0.928158	0.353325	0.999963
chr1:62128392-62129655	38.3259	0.122159	0.265506	0.460098	0.645446	0.999963
chr1:62181217-62183637	77.5304	-0.0814156	0.242543	-0.335674	0.737116	0.999963
chr1:62278537-62279958	34.536	0.22493	0.273132	0.823522	0.410211	0.999963
chr1:62283358-62283763	10.5743	0.185984	0.266897	0.696839	0.485904	0.999963
chr1:62299887-62300456	11.8841	0.0851909	0.270025	0.315492	0.752388	0.999963
chr1:62300771-62301456	17.0852	-0.00037529	0.276005	-0.00135973	0.998915	0.999963
chr1:62435284-62438828	171.271	0.0128203	0.255221	0.050232	0.959938	0.999963
chr1:62686719-62690731	149.632	-0.0114267	0.244172	-0.0467977	0.962674	0.999963
chr1:62783529-62786139	113.583	-0.221713	0.22859	-0.969916	0.332088	0.999963
chr1:62881416-62883227	49.4254	0.0484287	0.253784	0.190827	0.848661	0.999963
chr1:62897349-62897960	9.74101	0.221193	0.254556	0.868939	0.384881	0.999963
chr1:62918184-62920122	45.5966	0.152333	0.258508	0.589278	0.555675	0.999963
chr1:62950901-62952249	29.8001	-0.237855	0.270221	-0.880222	0.378739	0.999963
chr1:63011367-63011917	16.2905	0.0639035	0.275081	0.232308	0.816299	0.999963
chr1:63069542-63070123	13.3104	0.0140347	0.27424	0.0511766	0.959185	0.999963
chr1:63366644-63368364	39.9584	0.102736	0.273907	0.375076	0.707604	0.999963
chr1:63522342-63525331	174.347	-0.121933	0.224249	-0.543738	0.586622	0.999963
chr1:63593152-63594443	24.3935	0.0361053	0.273007	0.13225	0.894786	0.999963
chr1:63691737-63692594	17.6143	0.00454218	0.275702	0.016475	0.986855	0.999963
chr1:63729729-63730253	15.2131	-0.184976	0.275935	-0.670362	0.502627	0.999963
chr1:63730496-63731027	10.8967	-0.0887251	0.26582	-0.333779	0.738546	0.999963
chr1:64244680-64245841	32.0529	-0.274658	0.26834	-1.02355	0.30605	0.999963
chr1:64246557-64246954	17.3793	-0.21712	0.275789	-0.787271	0.431123	0.999963
chr1:64281956-64283486	44.0692	-0.0828366	0.268411	-0.308618	0.757612	0.999963
chr1:64469542-64473375	78.891	-0.056951	0.263529	-0.216109	0.828903	0.999963
chr1:64537334-64539340	68.5155	-0.0338554	0.258311	-0.131064	0.895724	0.999963
chr1:64539435-64541387	50.1004	-0.0616461	0.268152	-0.229892	0.818176	0.999963
chr1:64575519-64576166	19.9952	0.0457363	0.274965	0.166335	0.867893	0.999963
chr1:64581054-64581898	21.9942	0.00382127	0.275242	0.0138833	0.988923	0.999963
chr1:64594531-64595001	14.0002	0.242813	0.274143	0.885717	0.37577	0.999963
chr1:64663529-64665250	66.9141	-0.430739	0.247455	-1.74068	0.08174	0.999963
chr1:64683146-64683963	17.7009	-0.0648404	0.276042	-0.234894	0.814291	0.999963
chr1:64689550-64690345	14.2828	0.00101907	0.27468	0.00371004	0.99704	0.999963
chr1:64744210-64747211	65.9559	0.0260068	0.257826	0.100869	0.919654	0.999963
chr1:64823394-64823624	6.82514	-0.0761635	0.246018	-0.309585	0.756877	0.999963
chr1:64823706-64824373	20.3808	0.197177	0.275478	0.715761	0.474139	0.999963
chr1:64888448-64890181	46.8732	0.0369791	0.265674	0.13919	0.8893	0.999963
chr1:64899696-64900826	22.496	0.0698009	0.275385	0.253467	0.799907	0.999963
chr1:64901815-64902414	15.1814	0.368519	0.275765	1.33635	0.181435	0.999963
chr1:64928820-64929165	8.66834	0.0474739	0.258036	0.183982	0.854028	0.999963
chr1:64963710-64967605	104.738	0.316789	0.240619	1.31656	0.187987	0.999963
chr1:65064952-65069209	116.594	0.0700822	0.249892	0.28045	0.779132	0.999963
chr1:65114586-65115190	15.0821	-0.216415	0.275486	-0.785575	0.432117	0.999963
chr1:65231440-65231748	7.95136	0.196677	0.255883	0.768621	0.442118	0.999963
chr1:65254022-65256161	40.1018	0.0225144	0.275346	0.0817677	0.934831	0.999963
chr1:65265758-65266646	17.7558	0.116727	0.275966	0.422976	0.672313	0.999963
chr1:65308452-65311194	93.9437	0.157658	0.24137	0.65318	0.51364	0.999963
chr1:65411810-65413738	55.8072	0.175594	0.250758	0.700253	0.483769	0.999963
chr1:65419028-65420048	23.5055	-0.0418715	0.273481	-0.153106	0.878315	0.999963
chr1:65420609-65422224	86.0302	-0.279797	0.242103	-1.15569	0.247807	0.999963
chr1:65681135-65681624	11.2109	0.170977	0.271309	0.630192	0.528569	0.999963
chr1:65728645-65729191	12.6791	-0.0224283	0.27378	-0.0819207	0.93471	0.999963
chr1:65729690-65730475	15.0422	-0.199525	0.275494	-0.724243	0.468917	0.999963
chr1:65792079-65793545	26.5927	0.229069	0.275892	0.830287	0.406377	0.999963
chr1:65802734-65804751	44.399	-0.23322	0.269618	-0.865004	0.387036	0.999963
chr1:65805692-65806077	11.1994	0.27341	0.268731	1.01741	0.308957	0.999963
chr1:65817242-65818775	34.7823	0.180215	0.272768	0.66069	0.508811	0.999963
chr1:65820066-65821478	25.0873	0.0319286	0.274216	0.116436	0.907307	0.999963
chr1:65869913-65870438	15.6724	0.00410673	0.275667	0.0148974	0.988114	0.999963
chr1:65907988-65914766	440.88	-0.144727	0.226336	-0.639434	0.522541	0.999963
chr1:65914792-65916123	28.7194	0.102916	0.274438	0.375005	0.707656	0.999963
chr1:65916178-65920977	194.225	-0.0521242	0.237902	-0.2191	0.826572	0.999963
chr1:65957235-65959476	54.9867	0.139836	0.266228	0.525248	0.599411	0.999963
chr1:65963531-65966237	62.3888	0.132759	0.251958	0.526909	0.598257	0.999963
chr1:65970703-65971885	26.5064	0.0911763	0.272978	0.334006	0.738375	0.999963
chr1:65978887-65981641	68.6773	0.105404	0.256826	0.410411	0.681505	0.999963
chr1:65985316-65986618	39.3067	0.0862655	0.265291	0.325173	0.74505	0.999963
chr1:65990510-65990980	11.174	0.0847286	0.272233	0.311235	0.755622	0.999963
chr1:65991251-65996166	211.986	-0.0835208	0.230799	-0.361877	0.717444	0.999963
chr1:65998920-66001319	58.9034	0.135272	0.260727	0.518826	0.603882	0.999963
chr1:66011775-66012761	20.6049	0.113524	0.27602	0.411289	0.68086	0.999963
chr1:66012828-66013189	9.81677	-0.179999	0.268532	-0.67031	0.50266	0.999963
chr1:66033242-66034534	27.0728	0.261646	0.275273	0.950493	0.341862	0.999963
chr1:66034995-66035341	7.99486	0.161166	0.260186	0.619426	0.535636	0.999963
chr1:66069821-66070580	17.8111	-0.0770862	0.276063	-0.279234	0.780065	0.999963
chr1:66085897-66086327	12.7937	0.00495836	0.274485	0.0180642	0.985588	0.999963
chr1:66091391-66092424	23.8636	-0.107167	0.276069	-0.388188	0.697877	0.999963
chr1:66123206-66124790	37.5478	-0.244459	0.264065	-0.925755	0.354573	0.999963
chr1:66126888-66127200	7.62317	0.123667	0.254224	0.486449	0.626649	0.999963
chr1:66127499-66129235	55.2571	-0.000218995	0.260609	-0.00084032	0.99933	0.999963
chr1:66150278-66151271	23.1378	-0.0572703	0.275939	-0.207547	0.835582	0.999963
chr1:66151334-66152749	54.6942	-0.00484898	0.254963	-0.0190184	0.984826	0.999963
chr1:66152898-66154478	30.6955	0.00877644	0.268465	0.0326912	0.973921	0.999963
chr1:66168865-66170594	46.0563	0.00980138	0.260992	0.0375543	0.970043	0.999963
chr1:66175964-66176460	12.6115	0.29814	0.272601	1.09369	0.274093	0.999963
chr1:66181680-66184564	131.031	0.116701	0.231783	0.503491	0.614619	0.999963
chr1:66192807-66195628	76.4653	0.175603	0.266663	0.658519	0.510205	0.999963
chr1:66196976-66198563	57.8169	-0.357725	0.257249	-1.39058	0.164353	0.999963
chr1:66219882-66221324	28.6604	0.118929	0.271253	0.438443	0.661065	0.999963
chr1:66236364-66236952	11.0924	-0.361895	0.267643	-1.35215	0.176326	0.999963
chr1:66240433-66241318	23.7561	-0.0938042	0.273849	-0.34254	0.731945	0.999963
chr1:66241623-66243473	45.4708	0.00774765	0.260012	0.0297973	0.976229	0.999963
chr1:66243808-66244460	13.9525	0.174188	0.274217	0.635219	0.525286	0.999963
chr1:66244851-66246951	52.1804	0.0924879	0.256219	0.360972	0.718121	0.999963
chr1:66266849-66268449	45.1932	0.121996	0.259888	0.46942	0.63877	0.999963
chr1:66270072-66272888	65.9078	0.00588474	0.248006	0.0237282	0.981069	0.999963
chr1:66273137-66273806	14.5368	-0.12221	0.275108	-0.444225	0.65688	0.999963
chr1:66277762-66279453	37.7551	-0.108521	0.263034	-0.412575	0.679918	0.999963
chr1:66324563-66325061	13.2022	0.323824	0.272255	1.18941	0.234277	0.999963
chr1:66352426-66358093	418.555	-0.121307	0.209837	-0.578101	0.563196	0.999963
chr1:66359138-66360336	36.2251	-0.124214	0.269925	-0.460179	0.645388	0.999963
chr1:66360768-66362370	49.5797	0.118809	0.257826	0.460812	0.644933	0.999963
chr1:66445443-66446887	36.8909	0.0302668	0.262947	0.115106	0.908361	0.999963
chr1:66487718-66489632	48.2195	0.0483905	0.264355	0.183051	0.854758	0.999963
chr1:66531871-66537379	362.665	-0.099737	0.211645	-0.471246	0.637465	0.999963
chr1:66544729-66545436	25.8855	0.0628561	0.272657	0.230532	0.817678	0.999963
chr1:66545765-66546712	22.2548	-0.0430127	0.274948	-0.156439	0.875687	0.999963
chr1:66577161-66577461	6.2638	-0.310236	0.249825	-1.24181	0.214305	0.999963
chr1:66599148-66601073	61.4505	0.168144	0.248086	0.677765	0.497921	0.999963
chr1:66777167-66779403	39.4797	-0.0719125	0.270433	-0.265917	0.790303	0.999963
chr1:66923842-66926825	96.5201	0.129949	0.254932	0.509739	0.610234	0.999963
chr1:66929239-66932811	86.4385	-0.0524538	0.237836	-0.220546	0.825446	0.999963
chr1:67028746-67029335	10.87	0.26641	0.253622	1.05042	0.293524	0.999963
chr1:67052210-67054438	61.3039	0.183834	0.265366	0.692758	0.488462	0.999963
chr1:67429249-67430395	31.5366	-0.0348931	0.27584	-0.126498	0.899338	0.999963
chr1:67645572-67647224	52.4144	0.0449193	0.253801	0.176986	0.859519	0.999963
chr1:67685236-67687488	53.024	0.199762	0.26684	0.74862	0.454086	0.999963
chr1:67749408-67750918	32.6705	0.276005	0.268635	1.02744	0.304215	0.999963
chr1:67764504-67767391	108.204	-0.103463	0.235561	-0.439218	0.660503	0.999963
chr1:67799842-67800922	29.4011	-0.0161578	0.274742	-0.0588108	0.953103	0.999963
chr1:67849637-67851061	33.1361	0.260431	0.2721	0.957114	0.33851	0.999963
chr1:67854221-67858139	154.286	0.0849028	0.227225	0.37365	0.708665	0.999963
chr1:67919541-67921290	40.8456	0.0817943	0.258978	0.315835	0.752127	0.999963
chr1:67939340-67940075	15.0318	0.145245	0.273721	0.530633	0.595673	0.999963
chr1:67945033-67946720	37.1176	-0.0380744	0.268658	-0.141721	0.887301	0.999963
chr1:67963882-67965963	44.7354	0.0516901	0.266655	0.193846	0.846296	0.999963
chr1:67978895-67981015	55.3999	-0.120491	0.259375	-0.464544	0.642258	0.999963
chr1:68015545-68017188	57.5842	-0.019327	0.249823	-0.0773627	0.938335	0.999963
chr1:68102288-68104767	79.4338	-0.00194042	0.244231	-0.00794502	0.993661	0.999963
chr1:68104927-68105629	16.7556	0.305235	0.275716	1.10706	0.268267	0.999963
chr1:68110950-68112906	82.787	0.0292095	0.240133	0.121639	0.903185	0.999963
chr1:68139908-68140404	14.6449	0.288519	0.275884	1.0458	0.295654	0.999963
chr1:68141020-68142445	42.9997	0.321314	0.258258	1.24416	0.21344	0.999963
chr1:68144910-68145475	14.4223	0.255728	0.275241	0.929107	0.352834	0.999963
chr1:68150717-68151498	17.6692	0.0832786	0.276027	0.301704	0.762878	0.999963
chr1:68168932-68169701	19.4146	0.278541	0.275669	1.01042	0.312295	0.999963
chr1:68171208-68175394	180.471	0.133324	0.223267	0.59715	0.550407	0.999963
chr1:68175452-68176009	12.9085	0.059749	0.272695	0.219105	0.826568	0.999963
chr1:68293780-68294423	11.3182	0.111229	0.269838	0.412205	0.680189	0.999963
chr1:68312772-68315221	92.2971	-0.367551	0.237711	-1.54621	0.122054	0.999963
chr1:68319831-68320595	12.7952	-0.00323913	0.272481	-0.0118875	0.990515	0.999963
chr1:68356887-68359400	62.9694	-0.279527	0.249715	-1.11938	0.262976	0.999963
chr1:68361815-68362723	24.5598	0.334046	0.276042	1.21013	0.22623	0.999963
chr1:68363651-68369818	373.915	-0.401429	0.210476	-1.90725	0.0564883	0.999963
chr1:68406696-68407791	27.7761	0.236648	0.274773	0.861248	0.389101	0.999963
chr1:68458853-68460325	30.5964	0.189307	0.274157	0.690506	0.489876	0.999963
chr1:68468080-68468548	10.2775	0.483367	0.268407	1.80087	0.0717227	0.999963
chr1:68495704-68497065	25.016	-0.0678734	0.27566	-0.246221	0.805511	0.999963
chr1:68497347-68497987	13.7663	-0.0809491	0.27237	-0.297203	0.766311	0.999963
chr1:68523579-68523951	6.81945	0.00658047	0.245516	0.0268026	0.978617	0.999963
chr1:68565718-68566402	18.3871	0.0376048	0.276069	0.136215	0.891651	0.999963
chr1:68568636-68569035	7.85866	0.604145	0.259993	2.3237	0.0201416	0.999963
chr1:68571013-68573150	65.2095	0.0459142	0.25237	0.181932	0.855636	0.999963
chr1:68624777-68626551	45.2468	-0.183426	0.26163	-0.70109	0.483247	0.999963
chr1:68627610-68628658	28.4925	0.159489	0.274999	0.57996	0.561942	0.999963
chr1:68633481-68634484	28.0608	0.15887	0.269518	0.58946	0.555553	0.999963
chr1:68690330-68691059	16.0487	0.20585	0.275992	0.745853	0.455756	0.999963
chr1:68752596-68753732	27.2245	0.0216397	0.269945	0.0801634	0.936107	0.999963
chr1:68804744-68806221	32.6014	0.0377672	0.269171	0.140309	0.888416	0.999963
chr1:68813364-68814555	32.944	0.0469921	0.26659	0.176271	0.860081	0.999963
chr1:68916036-68917509	37.1083	0.11079	0.267456	0.414237	0.678701	0.999963
chr1:68929715-68930603	19.2609	0.0383654	0.276036	0.138987	0.889461	0.999963
chr1:68935711-68937029	27.0603	0.59076	0.27368	2.15858	0.0308827	0.999963
chr1:68937853-68939853	58.3535	0.0900303	0.248498	0.362298	0.717129	0.999963
chr1:68974771-68976697	44.4097	0.0657122	0.261986	0.250823	0.801951	0.999963
chr1:68977045-68978056	22.1651	0.0442426	0.27479	0.161005	0.872089	0.999963
chr1:69127152-69127650	12.8596	-0.0897556	0.273679	-0.32796	0.742942	0.999963
chr1:69128189-69128702	10.602	-0.20452	0.271608	-0.752997	0.451452	0.999963
chr1:69190905-69191846	22.9006	0.00494176	0.276009	0.0179043	0.985715	0.999963
chr1:69221313-69221620	9.80965	0.165269	0.269436	0.613389	0.539619	0.999963
chr1:69245383-69248883	167.057	-0.155983	0.240253	-0.649246	0.516179	0.999963
chr1:69257688-69259774	41.5371	-0.0414317	0.267329	-0.154984	0.876834	0.999963
chr1:69263583-69264693	31.9655	-0.0134972	0.266637	-0.05062	0.959628	0.999963
chr1:69566232-69571536	230.037	-0.0279494	0.236835	-0.118012	0.906058	0.999963
chr1:69661067-69662829	35.2662	-0.148706	0.264256	-0.562736	0.573614	0.999963
chr1:69674896-69675821	26.1969	0.00610328	0.274814	0.0222087	0.982281	0.999963
chr1:69676181-69677004	20.2479	-0.257301	0.276059	-0.932051	0.35131	0.999963
chr1:69684142-69684607	8.59468	-0.215172	0.254999	-0.843817	0.398772	0.999963
chr1:69733272-69733783	11.6369	-0.142022	0.273507	-0.519263	0.603577	0.999963
chr1:69739279-69739767	13.3127	0.192749	0.272767	0.706645	0.479787	0.999963
chr1:69752304-69753094	17.4834	-0.0464336	0.275805	-0.168357	0.866303	0.999963
chr1:69825728-69826719	16.0326	0.375612	0.274107	1.37031	0.17059	0.999963
chr1:69835052-69837733	63.804	0.138217	0.264859	0.521852	0.601773	0.999963
chr1:69846247-69847258	22.6834	-0.133614	0.274282	-0.487139	0.62616	0.999963
chr1:69847698-69849752	40.6803	-0.0132203	0.269548	-0.0490463	0.960882	0.999963
chr1:69863136-69865088	53.1552	0.117844	0.260431	0.452496	0.650912	0.999963
chr1:70100901-70101598	15.9507	0.032628	0.274556	0.118839	0.905403	0.999963
chr1:70104728-70105084	9.04925	0.328828	0.266025	1.23608	0.216429	0.999963
chr1:70114074-70119333	184.371	-0.141829	0.233644	-0.60703	0.543831	0.999963
chr1:70120247-70121395	20.6444	0.106574	0.273691	0.389395	0.696984	0.999963
chr1:70138366-70142937	144.243	-0.0718084	0.233069	-0.3081	0.758007	0.999963
chr1:70143208-70143614	9.752	0.145891	0.263789	0.55306	0.580222	0.999963
chr1:70193441-70194146	13.8952	-0.15218	0.272561	-0.558335	0.576616	0.999963
chr1:70194462-70194843	10.3378	-0.0708028	0.269747	-0.262478	0.792953	0.999963
chr1:70203624-70207124	192.779	-0.128527	0.222373	-0.57798	0.563278	0.999963
chr1:70220132-70223790	176.122	-0.044378	0.223848	-0.19825	0.842849	0.999963
chr1:70247433-70247875	9.71702	0.204408	0.266062	0.768273	0.442325	0.999963
chr1:70280370-70281241	19.6352	-0.122427	0.275833	-0.443843	0.657156	0.999963
chr1:70284507-70284954	12.0487	-0.0983092	0.273793	-0.359065	0.719547	0.999963
chr1:70294901-70297087	58.6778	-0.151518	0.256035	-0.591787	0.553993	0.999963
chr1:70314720-70315851	27.0428	0.213568	0.274418	0.778257	0.436417	0.999963
chr1:70352484-70355785	140.153	-0.0829051	0.246546	-0.336266	0.73667	0.999963
chr1:70359987-70363621	164.079	0.0389535	0.222722	0.174897	0.861161	0.999963
chr1:70399703-70401225	51.4511	-0.155095	0.257191	-0.603031	0.546488	0.999963
chr1:70409627-70412194	108.235	-0.214887	0.236727	-0.907741	0.364015	0.999963
chr1:70457458-70459008	34.7101	-0.0848785	0.26443	-0.320986	0.748221	0.999963
chr1:70464958-70466880	56.1765	0.095363	0.266283	0.358126	0.720249	0.999963
chr1:70542005-70543732	36.0335	-0.0358088	0.269357	-0.132942	0.894239	0.999963
chr1:70841755-70842526	18.3543	0.165731	0.276057	0.600349	0.548273	0.999963
chr1:71050530-71051090	12.2925	-0.141454	0.273599	-0.517014	0.605146	0.999963
chr1:71079649-71081827	95.7253	-0.100917	0.234147	-0.430997	0.66647	0.999963
chr1:71094224-71095151	29.5565	0.240994	0.269555	0.894044	0.371299	0.999963
chr1:71197706-71198039	10.652	-0.34857	0.270339	-1.28938	0.197266	0.999963
chr1:71200246-71202460	76.2905	-0.169142	0.252332	-0.670318	0.502655	0.999963
chr1:71222588-71227419	133.534	-0.275101	0.239508	-1.14861	0.250717	0.999963
chr1:71231604-71231963	7.5909	0.375689	0.259763	1.44627	0.1481	0.999963
chr1:71420290-71423771	121.83	-0.260833	0.257048	-1.01473	0.310237	0.999963
chr1:71425884-71427181	34.5325	-0.0699449	0.27338	-0.255852	0.798065	0.999963
chr1:71427328-71427830	10.2554	-0.171675	0.267327	-0.642191	0.520749	0.999963
chr1:71437579-71438347	15.7695	-0.106398	0.275468	-0.386245	0.699315	0.999963
chr1:71453490-71454685	23.6088	0.0718542	0.276023	0.26032	0.794617	0.999963
chr1:71481805-71485469	108.157	-0.115905	0.246599	-0.470013	0.638346	0.999963
chr1:71486545-71487707	30.4016	0.0612538	0.268565	0.228078	0.819585	0.999963
chr1:71552709-71553813	25.7689	0.21174	0.275042	0.769846	0.441391	0.999963
chr1:71577479-71577835	9.38495	0.406542	0.268007	1.51691	0.12929	0.999963
chr1:71577857-71578747	22.8417	-0.215124	0.274912	-0.782521	0.433909	0.999963
chr1:71579107-71579413	9.80395	-0.0910997	0.264333	-0.34464	0.730365	0.999963
chr1:71586767-71587509	19.3954	0.120092	0.275706	0.43558	0.663141	0.999963
chr1:71587939-71589294	27.3911	-0.143426	0.273683	-0.524059	0.600237	0.999963
chr1:71590643-71594798	188.798	0.0355456	0.22979	0.154687	0.877068	0.999963
chr1:71598245-71600703	76.585	-0.111199	0.251947	-0.441359	0.658953	0.999963
chr1:71622763-71623156	9.83697	0.210044	0.259345	0.809901	0.417997	0.999963
chr1:71623528-71624648	25.8558	-0.104717	0.275148	-0.380583	0.703513	0.999963
chr1:71641199-71642125	19.8296	0.0329507	0.27572	0.119508	0.904873	0.999963
chr1:71745291-71747697	55.8094	-0.248819	0.260728	-0.954327	0.339918	0.999963
chr1:71755688-71757998	84.4934	0.0653932	0.260087	0.251428	0.801483	0.999963
chr1:71808501-71809400	18.9643	-0.0633705	0.275799	-0.229771	0.81827	0.999963
chr1:71827040-71828523	34.8519	-0.0415096	0.273205	-0.151936	0.879237	0.999963
chr1:71852373-71853595	25.0255	-0.0309122	0.275937	-0.112026	0.910802	0.999963
chr1:71856700-71858677	41.3539	0.169126	0.270159	0.626022	0.531301	0.999963
chr1:71949863-71950546	13.7869	-0.202858	0.271002	-0.748545	0.454131	0.999963
chr1:71966832-71967187	9.193	-0.0629988	0.263254	-0.239308	0.810867	0.999963
chr1:71971580-71972370	16.3045	-0.0302691	0.27356	-0.110649	0.911895	0.999963
chr1:72011220-72011965	15.0102	0.270604	0.275372	0.982687	0.325762	0.999963
chr1:72023341-72023753	11.7595	0.281203	0.272275	1.03279	0.301703	0.999963
chr1:72023918-72024858	24.0184	-0.120934	0.275421	-0.439088	0.660598	0.999963
chr1:72153051-72153631	10.9196	-0.104165	0.268354	-0.388162	0.697896	0.999963
chr1:72183888-72184969	21.3132	0.0554105	0.27587	0.200858	0.84081	0.999963
chr1:72280470-72282644	80.0104	-0.30484	0.243407	-1.25239	0.210429	0.999963
chr1:72282918-72286416	194.175	-0.330022	0.224834	-1.46785	0.142146	0.999963
chr1:72362556-72363421	17.4856	-0.120623	0.275897	-0.437205	0.661963	0.999963
chr1:72496006-72497262	35.4349	0.0772432	0.273312	0.282619	0.777469	0.999963
chr1:72513464-72514105	14.1383	0.100419	0.275353	0.364691	0.715342	0.999963
chr1:72567289-72567918	14.8012	-0.235398	0.275337	-0.854943	0.392583	0.999963
chr1:72595509-72595845	7.89804	0.243575	0.251816	0.967272	0.333408	0.999963
chr1:72602076-72602659	15.6803	-0.0741303	0.275859	-0.268725	0.788141	0.999963
chr1:72706734-72707167	10.9705	0.0208836	0.268398	0.0778084	0.93798	0.999963
chr1:72872026-72873495	31.0149	-0.162875	0.273566	-0.595377	0.551592	0.999963
chr1:72896109-72896510	11.7441	0.263809	0.273486	0.964617	0.334737	0.999963
chr1:72898170-72898713	10.7308	-0.0226266	0.259017	-0.0873555	0.930389	0.999963
chr1:72910796-72911417	13.0519	-0.0495494	0.271078	-0.182786	0.854966	0.999963
chr1:72934447-72935181	13.6083	0.10456	0.269406	0.388111	0.697934	0.999963
chr1:72937368-72938058	16.9349	-0.232159	0.275705	-0.842056	0.399757	0.999963
chr1:72938214-72939278	28.8763	-0.317306	0.272855	-1.16291	0.244865	0.999963
chr1:72956192-72956845	16.5097	0.0976764	0.274873	0.355351	0.722327	0.999963
chr1:73064630-73066859	73.9095	0.101687	0.251627	0.404119	0.686126	0.999963
chr1:73076910-73078789	45.3745	0.0522729	0.26712	0.195691	0.844852	0.999963
chr1:73131760-73132213	10.597	0.325054	0.263842	1.23201	0.217947	0.999963
chr1:73217518-73220400	82.4965	-0.0667354	0.261698	-0.25501	0.798716	0.999963
chr1:73255301-73256957	46.1682	-0.20682	0.259371	-0.79739	0.425224	0.999963
chr1:73517129-73517864	22.7572	-0.0818632	0.275406	-0.297245	0.766279	0.999963
chr1:73518193-73518959	15.8544	-0.0845855	0.273811	-0.308919	0.757383	0.999963
chr1:73543063-73544650	34.8357	0.0227787	0.269338	0.0845726	0.932601	0.999963
chr1:73575394-73576128	20.4672	0.0942967	0.275726	0.341994	0.732356	0.999963
chr1:73604647-73605187	14.2514	0.146595	0.274844	0.533376	0.593773	0.999963
chr1:73609725-73611801	52.81	-0.0488709	0.267179	-0.182914	0.854865	0.999963
chr1:73647319-73648475	39.3721	-0.0590662	0.264486	-0.223324	0.823283	0.999963
chr1:73659139-73659826	11.6017	-0.0154682	0.272743	-0.0567133	0.954774	0.999963
chr1:73672945-73674935	62.7467	-0.29199	0.253273	-1.15286	0.248966	0.999963
chr1:73727148-73727526	7.8665	-0.188303	0.251635	-0.748318	0.454269	0.999963
chr1:73756829-73760075	102.112	-0.153414	0.2557	-0.599977	0.548521	0.999963
chr1:73804300-73805260	19.4991	0.0210383	0.273882	0.076815	0.938771	0.999963
chr1:73805336-73805809	7.88134	-0.284753	0.261314	-1.0897	0.275847	0.999963
chr1:73812942-73813772	18.3493	0.209609	0.276039	0.759347	0.447645	0.999963
chr1:73822174-73822655	10.5684	0.210214	0.270959	0.775813	0.43786	0.999963
chr1:73824751-73826482	43.3656	-0.0632905	0.265863	-0.238057	0.811837	0.999963
chr1:73860344-73861093	20.008	0.12398	0.275049	0.450757	0.652165	0.999963
chr1:73867743-73868878	30.4318	-0.222501	0.272921	-0.81526	0.414924	0.999963
chr1:73869046-73869328	7.83199	0.0394059	0.260176	0.151459	0.879614	0.999963
chr1:73900850-73902964	39.1874	-0.185611	0.265964	-0.697879	0.485253	0.999963
chr1:73909560-73910315	16.8197	-0.113545	0.276031	-0.41135	0.680816	0.999963
chr1:73914603-73915611	33.5514	0.17756	0.270843	0.655583	0.512092	0.999963
chr1:73997361-73998371	23.8511	-0.138334	0.275159	-0.502743	0.615145	0.999963
chr1:73998606-73999291	16.2034	-0.302266	0.274887	-1.0996	0.271506	0.999963
chr1:74064468-74065713	21.5568	-0.0864901	0.276045	-0.313319	0.754038	0.999963
chr1:74085444-74086137	14.2755	0.307432	0.274072	1.12172	0.261981	0.999963
chr1:74197379-74199382	58.3747	-0.271825	0.253051	-1.07419	0.282738	0.999963
chr1:74218435-74218920	10.6256	0.3268	0.256902	1.27208	0.203345	0.999963
chr1:74275562-74276661	27.9378	-0.146182	0.27367	-0.534156	0.593234	0.999963
chr1:74276862-74277531	15.8333	-0.222508	0.273739	-0.812847	0.416306	0.999963
chr1:74282390-74284091	32.6078	0.197037	0.273423	0.720632	0.471136	0.999963
chr1:74298842-74299419	13.0613	0.15732	0.272022	0.578335	0.563038	0.999963
chr1:74311575-74313644	37.074	0.0676812	0.264667	0.255722	0.798165	0.999963
chr1:74314649-74315383	14.7966	0.0880839	0.270425	0.325725	0.744633	0.999963
chr1:74321137-74321795	17.7606	0.0845637	0.275627	0.306805	0.758992	0.999963
chr1:74338316-74340125	41.799	0.0959337	0.263144	0.364567	0.715435	0.999963
chr1:74340719-74341660	19.6747	-0.198007	0.275748	-0.718074	0.472712	0.999963
chr1:74341988-74344383	73.2063	-0.151234	0.249628	-0.605837	0.544623	0.999963
chr1:74355815-74359196	97.3305	-0.199966	0.246433	-0.811439	0.417113	0.999963
chr1:74362606-74363253	15.0513	0.0949896	0.275977	0.344195	0.7307	0.999963
chr1:74382224-74383345	28.7353	-0.0432648	0.272448	-0.1588	0.873827	0.999963
chr1:74383609-74384838	26.8079	-0.0700848	0.274025	-0.255761	0.798136	0.999963
chr1:74392821-74393379	12.359	0.054552	0.272433	0.20024	0.841293	0.999963
chr1:74419418-74421561	59.1805	-0.0302856	0.260639	-0.116198	0.907496	0.999963
chr1:74421870-74422788	24.0193	0.125525	0.272433	0.460757	0.644973	0.999963
chr1:74436210-74436706	17.1799	0.204936	0.275585	0.74364	0.457094	0.999963
chr1:74457108-74458262	27.8992	0.271833	0.271456	1.00139	0.316638	0.999963
chr1:74462495-74464794	65.6566	-0.0834295	0.257729	-0.32371	0.746157	0.999963
chr1:74467422-74469182	68.1758	0.111386	0.261973	0.425183	0.670703	0.999963
chr1:74471440-74472105	13.5002	0.154053	0.274292	0.561639	0.574362	0.999963
chr1:74473403-74476490	96.9815	-0.0477643	0.235778	-0.202582	0.839462	0.999963
chr1:74476948-74477861	18.0601	-0.195833	0.275673	-0.71038	0.477469	0.999963
chr1:74479355-74480093	18.0901	0.0015856	0.276069	0.00574351	0.995417	0.999963
chr1:74481430-74482839	39.4139	0.132515	0.267713	0.494988	0.620608	0.999963
chr1:74503118-74509289	437.024	-0.169662	0.213471	-0.794779	0.426742	0.999963
chr1:74511811-74514640	89.1134	-0.00655313	0.244915	-0.0267568	0.978654	0.999963
chr1:74521445-74523648	64.291	-0.0565654	0.251116	-0.225256	0.82178	0.999963
chr1:74524045-74524463	8.97046	-0.11673	0.265469	-0.439711	0.660146	0.999963
chr1:74534673-74535386	14.9688	-0.194631	0.275048	-0.707625	0.479178	0.999963
chr1:74546130-74547213	26.107	-0.0483858	0.272503	-0.17756	0.859068	0.999963
chr1:74574958-74577275	72.5247	-0.247446	0.246593	-1.00346	0.315639	0.999963
chr1:74580492-74580812	9.64041	0.288466	0.264916	1.0889	0.2762	0.999963
chr1:74596641-74597276	13.5331	0.0246686	0.27544	0.0895607	0.928636	0.999963
chr1:74639746-74640447	16.8436	-0.113069	0.27601	-0.409655	0.682059	0.999963
chr1:74647069-74647731	12.5745	0.229765	0.268307	0.856353	0.391803	0.999963
chr1:74648166-74648921	22.0008	0.0156469	0.274152	0.0570738	0.954486	0.999963
chr1:74673436-74674172	12.0519	0.117515	0.266077	0.441659	0.658736	0.999963
chr1:74688598-74691074	70.6513	-0.0470085	0.245472	-0.191502	0.848132	0.999963
chr1:74694224-74694525	7.5786	0.0963906	0.254254	0.379112	0.704605	0.999963
chr1:74703394-74704147	16.722	0.050719	0.276058	0.183726	0.854228	0.999963
chr1:74964314-74964548	10.0967	0.365136	0.271103	1.34685	0.178028	0.999963
chr1:74964895-74965581	20.1877	-0.1291	0.275808	-0.468077	0.639729	0.999963
chr1:75338123-75340333	72.9406	-0.0191899	0.244348	-0.0785354	0.937402	0.999963
chr1:75341417-75343932	93.2911	-0.275509	0.241552	-1.14058	0.254047	0.999963
chr1:75345270-75346182	19.0559	-0.0253722	0.276022	-0.0919208	0.926761	0.999963
chr1:75396266-75397486	22.3098	0.0416434	0.275869	0.150954	0.880012	0.999963
chr1:75420832-75422763	45.6454	-0.103027	0.262771	-0.392081	0.694998	0.999963
chr1:75430982-75432848	31.9417	-0.0774818	0.273724	-0.283065	0.777127	0.999963
chr1:75438750-75439314	11.4839	-0.0344452	0.273068	-0.126141	0.89962	0.999963
chr1:75439550-75440234	16.2914	-0.163058	0.274056	-0.59498	0.551857	0.999963
chr1:75447493-75447890	10.8532	0.541781	0.268502	2.01779	0.0436129	0.999963
chr1:75473168-75473513	9.11754	-0.0746672	0.266648	-0.280021	0.779461	0.999963
chr1:75501397-75502082	14.6825	-0.0406871	0.274802	-0.148059	0.882296	0.999963
chr1:75560905-75561471	10.6884	-0.0807944	0.271278	-0.297828	0.765834	0.999963
chr1:75566382-75566630	9.27381	0.131573	0.264223	0.497961	0.618511	0.999963
chr1:75613156-75614649	26.1641	-0.129939	0.272136	-0.477478	0.633022	0.999963
chr1:75615063-75617153	36.5541	0.247705	0.276066	0.897267	0.369576	0.999963
chr1:75723408-75725677	76.1757	-0.0450713	0.24173	-0.186453	0.85209	0.999963
chr1:75785434-75787555	77.8978	-0.0529177	0.241181	-0.219411	0.82633	0.999963
chr1:76074767-76075216	11.5959	0.0621397	0.26781	0.232029	0.816516	0.999963
chr1:76135822-76136768	16.0049	-0.35097	0.275955	-1.27183	0.203432	0.999963
chr1:76181113-76182274	24.5015	0.0449754	0.27383	0.164246	0.869538	0.999963
chr1:76186388-76187375	30.4666	0.206286	0.269152	0.766427	0.443422	0.999963
chr1:76293128-76296196	75.0803	-0.0851723	0.249644	-0.341176	0.732971	0.999963
chr1:76298658-76299183	15.1164	0.0215474	0.275255	0.0782816	0.937604	0.999963
chr1:76313345-76315203	40.4395	0.0118155	0.267783	0.0441236	0.964806	0.999963
chr1:76315345-76316256	18.9409	0.412321	0.2724	1.51366	0.130112	0.999963
chr1:76403791-76405408	49.6935	-0.0621441	0.262652	-0.236603	0.812965	0.999963
chr1:76432868-76433888	28.45	-0.0193604	0.268803	-0.0720245	0.942582	0.999963
chr1:76501231-76501689	15.1538	0.0434523	0.275838	0.157528	0.874829	0.999963
chr1:76516511-76516811	10.9642	0.211232	0.270573	0.780686	0.434987	0.999963
chr1:76569581-76570216	15.9349	0.437711	0.275575	1.58836	0.112206	0.999963
chr1:76615320-76615961	10.5442	0.156009	0.269104	0.579736	0.562093	0.999963
chr1:76625685-76626192	11.741	0.378224	0.271621	1.39247	0.163781	0.999963
chr1:76638680-76639239	14.6704	0.118484	0.275624	0.429876	0.667286	0.999963
chr1:76639481-76641195	32.9865	-0.0565444	0.271963	-0.207912	0.835298	0.999963
chr1:76713415-76714157	17.0759	0.246477	0.275695	0.894021	0.371311	0.999963
chr1:76719273-76719824	10.4252	0.504078	0.269761	1.86861	0.0616772	0.999963
chr1:76724172-76724683	14.5093	0.178661	0.27563	0.648193	0.51686	0.999963
chr1:76828949-76829751	17.0513	-0.0108863	0.27581	-0.0394702	0.968516	0.999963
chr1:76866806-76868837	49.4283	0.280998	0.268236	1.04758	0.294833	0.999963
chr1:76869315-76869846	14.0963	0.0465986	0.275096	0.16939	0.86549	0.999963
chr1:76881309-76881922	14.1336	0.0671256	0.275307	0.243821	0.807369	0.999963
chr1:76919451-76920330	17.0656	0.106062	0.276057	0.384203	0.700828	0.999963
chr1:76927433-76927922	12.0831	0.134564	0.272738	0.493382	0.621743	0.999963
chr1:76932451-76939723	297.731	-0.0354721	0.223967	-0.158381	0.874156	0.999963
chr1:76945206-76946065	16.4206	0.301533	0.274869	1.09701	0.272638	0.999963
chr1:76962386-76963007	11.778	0.0137906	0.268199	0.0514193	0.958991	0.999963
chr1:76991774-76992319	9.36064	0.182252	0.261379	0.697273	0.485632	0.999963
chr1:76992952-76994797	55.8741	-0.0984522	0.257701	-0.382041	0.702431	0.999963
chr1:76998979-76999436	11.3004	-0.300654	0.271652	-1.10676	0.268397	0.999963
chr1:77010828-77011317	13.4836	0.139157	0.27385	0.508149	0.611349	0.999963
chr1:77011887-77012429	13.2456	0.228603	0.275054	0.831121	0.405905	0.999963
chr1:77013272-77016075	87.1434	-0.22839	0.240293	-0.950463	0.341877	0.999963
chr1:77016263-77022753	288.005	-0.275372	0.216883	-1.26968	0.204198	0.999963
chr1:77022855-77023731	12.3537	0.128883	0.271252	0.47514	0.634687	0.999963
chr1:77024101-77025087	15.8055	0.00448744	0.275565	0.0162845	0.987007	0.999963
chr1:77033822-77037017	65.4323	-0.0329412	0.248459	-0.132582	0.894524	0.999963
chr1:77037533-77040541	61.0426	-0.12922	0.247659	-0.521764	0.601835	0.999963
chr1:77064606-77065470	15.499	-0.0248052	0.273718	-0.0906235	0.927792	0.999963
chr1:77089686-77090290	15.1544	0.0119156	0.273455	0.0435744	0.965244	0.999963
chr1:77120771-77123055	53.2821	-0.0119889	0.26891	-0.0445835	0.964439	0.999963
chr1:77200567-77201395	15.4782	-0.37906	0.275405	-1.37637	0.168707	0.999963
chr1:77201751-77203903	43.7634	-0.359044	0.264616	-1.35685	0.174829	0.999963
chr1:77218510-77220266	52.3242	0.0474236	0.253097	0.187373	0.851368	0.999963
chr1:77281671-77282696	15.3622	0.456061	0.26317	1.73296	0.0831034	0.999963
chr1:77354259-77354759	13.4504	0.0842513	0.274141	0.307329	0.758593	0.999963
chr1:77386521-77388878	55.6403	-0.137012	0.257783	-0.531501	0.595072	0.999963
chr1:77398158-77398787	10.8736	-0.273708	0.271649	-1.00758	0.313657	0.999963
chr1:77414607-77415551	22.8963	0.216911	0.27578	0.786538	0.431553	0.999963
chr1:77488656-77490997	55.2304	-0.134919	0.253956	-0.531269	0.595232	0.999963
chr1:77491735-77492729	19.7001	-0.239497	0.276051	-0.867584	0.385622	0.999963
chr1:77514635-77516177	28.3968	0.200285	0.27054	0.740316	0.459108	0.999963
chr1:77642644-77644615	57.2643	-0.398846	0.254234	-1.56882	0.116691	0.999963
[truncated: 60,423 more rows]

## Sheet: DESeq2_BIN1-SVA-KO_H3K4me3
Peak location	base mean	log2FC	StdErr	Wald-Stats	P-value	Padj
chr5:178939801-178942155	124.829	2.16706	0.148198	14.6227	2.01229e-48	5.15589e-44
chr15:45703824-45706184	133.5	1.37086	0.146933	9.32982	1.06051e-20	1.35862e-16
chr1:159780118-159781812	123.168	1.0028	0.144678	6.93126	4.17098e-12	3.5623e-08
chr14:40629428-40630991	45.474	0.875709	0.131447	6.66205	2.70033e-11	1.7297e-07
chr11:49207948-49208848	27.3342	0.885397	0.135541	6.53233	6.47551e-11	3.31831e-07
chr15:96983925-96984885	36.2024	0.716127	0.122912	5.82633	5.66591e-09	2.41953e-05
chr19:12194558-12196254	53.3255	-0.795724	0.139595	-5.70022	1.19653e-08	4.37965e-05
chr5:150903218-150906569	254.818	0.794153	0.14841	5.35107	8.74377e-08	0.000280041
chr1:143735778-143736933	21.7152	0.602405	0.124716	4.8302	1.36398e-06	0.00349478
chr19:37311790-37313516	40.351	0.637811	0.131552	4.84836	1.24486e-06	0.00349478
chr19:20051484-20053355	395.445	0.606006	0.127506	4.75278	2.0064e-06	0.00467346
chr15:96324713-96328492	178.186	-0.626167	0.140644	-4.45215	8.5015e-06	0.0181521
chr6:27514527-27515638	26.5525	-0.564557	0.127345	-4.43328	9.28106e-06	0.0182923
chr15:39976301-39976976	45.0194	0.650307	0.147389	4.41217	1.02338e-05	0.0187293
chr19:43899661-43903015	238.722	-0.616992	0.141462	-4.36154	1.29151e-05	0.0220608
chr19:36244638-36246394	86.9327	0.630881	0.147079	4.28939	1.79164e-05	0.0270032
chr4:164956217-164959650	455.502	0.5773	0.134362	4.29661	1.73431e-05	0.0270032
chr7:151013194-151014360	16.7501	0.472951	0.112902	4.18904	2.80141e-05	0.0398764
chr5:43288210-43315435	4373.57	-0.551503	0.13237	-4.16638	3.09472e-05	0.0417331
chr19:44448009-44448941	14.1389	0.457187	0.110802	4.12616	3.68871e-05	0.047256
chr10:100345007-100358511	2378.61	-0.438247	0.107169	-4.08933	4.3263e-05	0.0515313
chr5:63958829-63963303	279.707	-0.538011	0.131733	-4.08411	4.42467e-05	0.0515313
chr14:22917120-22920094	485.944	0.526209	0.130614	4.02874	5.6076e-05	0.0577277
chr14:105525855-105528761	317.298	0.581736	0.143747	4.04693	5.18936e-05	0.0577277
chr19:20077696-20079810	344.05	0.522385	0.129698	4.0277	5.63263e-05	0.0577277
chr10:1041875-1046918	383.171	-0.563812	0.144002	-3.91532	9.02857e-05	0.0889731
chr1:203075412-203076313	29.6154	0.498926	0.129285	3.85911	0.000113799	0.0993687
chr16:90076850-90078669	120.558	-0.557116	0.143969	-3.86971	0.000108965	0.0993687
chr19:20166883-20168546	307.385	0.509169	0.132125	3.8537	0.000116348	0.0993687
chr6:122831085-122834142	114.567	-0.572319	0.148189	-3.8621	0.000112416	0.0993687
chr10:6163137-6165518	378.233	0.50384	0.136297	3.69663	0.000218482	0.180579
chr19:37209521-37211394	264.736	0.539671	0.146505	3.68365	0.000229921	0.184095
chr1:143803942-143805384	78.0833	0.540173	0.148871	3.62846	0.000285118	0.221372
chr9:137114208-137115391	142.243	0.515368	0.143646	3.58776	0.000333534	0.251348
chr13:54571968-54573075	16.2665	0.387027	0.108609	3.56348	0.00036597	0.260469
chr5:93600578-93605477	140.308	-0.529568	0.14836	-3.56947	0.000357704	0.260469
chrX:140089458-140092702	134.109	0.516052	0.145293	3.5518	0.000382599	0.264945
chr10:101775322-101776788	58.9764	0.519011	0.146683	3.53831	0.000402697	0.271524
chrX:114583800-114586292	264.932	0.499097	0.142219	3.50937	0.000449175	0.295096
chr11:34437946-34440526	238.07	0.3959	0.113161	3.49855	0.000467798	0.299648
chr19:20036826-20040002	527.65	0.447332	0.128802	3.47302	0.00051464	0.321612
chr15:96329306-96342984	1355.31	-0.4069	0.119299	-3.41077	0.000647793	0.395184
chrX:2580132-2586554	588.538	0.397883	0.119014	3.34316	0.000828303	0.493553
chr11:70824201-70827942	214.32	-0.461861	0.138969	-3.32347	0.000889049	0.517709
chr19:11088401-11095737	1614.65	-0.356305	0.107616	-3.31089	0.000930009	0.529527
chr5:75335617-75348921	2324.77	-0.438805	0.133868	-3.27789	0.00104585	0.582537
chr7:155295838-155305606	2064.65	-0.35405	0.110565	-3.2022	0.00136384	0.743497
chr20:26008979-26010904	139.163	-0.461157	0.145543	-3.16853	0.00153215	0.817846
chr7:87036216-87041508	705.873	-0.432671	0.137951	-3.13642	0.00171021	0.894267
chr11:10043912-10044750	14.0429	-0.364798	0.116812	-3.12294	0.00179056	0.899562
chr12:12927679-12928121	14.1699	0.357274	0.114353	3.1243	0.00178231	0.899562
chr7:153886239-153887553	70.5419	0.461423	0.148321	3.11097	0.00186476	0.918823
chr10:129898512-129899406	27.7867	-0.430521	0.139762	-3.08039	0.00206729	0.945858
chr19:58058531-58060249	165.648	0.452686	0.146737	3.08501	0.00203546	0.945858
chr2:182519849-182523609	137.499	-0.458359	0.148315	-3.09044	0.00199858	0.945858
chr4:165324578-165344826	4278.62	-0.421722	0.136527	-3.08893	0.0020088	0.945858
chr1:28408-28794	32.5838	-0.0857835	0.136389	-0.62896	0.529375	0.99901
chr1:198858-199339	80.8011	-0.128864	0.143975	-0.89504	0.370766	0.99901
chr1:777560-780456	646.967	-0.13498	0.123491	-1.09304	0.274377	0.99901
chr1:824861-830048	689.365	0.0211572	0.118623	0.178356	0.858443	0.99901
chr1:869512-870339	44.1016	0.0319617	0.147091	0.217292	0.827981	0.99901
chr1:903812-906407	313.778	0.146241	0.136452	1.07174	0.283836	0.99901
chr1:920607-921604	44.6459	0.102268	0.146519	0.697985	0.485187	0.99901
chr1:923115-926223	185.096	0.40509	0.144127	2.81065	0.00494417	0.99901
chr1:935076-936102	17.6402	-0.0177937	0.126701	-0.140438	0.888314	0.99901
chr1:939832-942798	132.174	0.137847	0.147669	0.933492	0.350566	0.99901
chr1:957813-959846	540.295	-0.0770309	0.130725	-0.58926	0.555687	0.99901
chr1:960127-961943	218.892	0.208124	0.143809	1.44723	0.147832	0.99901
chr1:966490-967224	25.7174	0.0738235	0.1331	0.554645	0.579137	0.99901
chr1:975716-976606	20.1276	-0.108951	0.132498	-0.822282	0.410916	0.99901
chr1:997573-1002707	1181.82	0.17974	0.133512	1.34624	0.178224	0.99901
chr1:1012992-1013976	47.8609	-0.0807558	0.146838	-0.549966	0.582342	0.99901
chr1:1018871-1021699	263.246	0.2495	0.14208	1.75605	0.0790792	0.99901
chr1:1032776-1035807	359.131	0.202035	0.135396	1.49218	0.135651	0.99901
chr1:1039037-1040883	128.781	0.148386	0.146178	1.01511	0.310056	0.99901
chr1:1058848-1060396	166.768	0.281025	0.143395	1.9598	0.0500192	0.99901
chr1:1068170-1069949	208.286	0.215428	0.140103	1.53763	0.124138	0.99901
chr1:1114401-1117521	427.618	0.0962083	0.130921	0.734857	0.462427	0.99901
chr1:1157477-1158354	44.2118	0.0860622	0.146598	0.587063	0.557161	0.99901
chr1:1176213-1176818	16.199	0.137275	0.119707	1.14676	0.25148	0.99901
chr1:1200701-1201828	86.9979	0.235741	0.148839	1.58387	0.113224	0.99901
chr1:1229973-1232112	637.098	-0.0600568	0.1252	-0.479686	0.631451	0.99901
chr1:1232510-1234035	77.629	0.072086	0.148624	0.485022	0.627661	0.99901
chr1:1270998-1275052	807.046	0.034326	0.134269	0.255651	0.798221	0.99901
chr1:1303853-1310109	1300.48	0.11824	0.135372	0.873443	0.382422	0.99901
chr1:1324172-1326564	642.576	0.0673766	0.140325	0.480147	0.631123	0.99901
chr1:1347240-1349159	385.918	0.131481	0.137872	0.953645	0.340264	0.99901
chr1:1349562-1350013	92.6592	0.103283	0.148297	0.696462	0.486139	0.99901
chr1:1354110-1355747	51.5696	0.270341	0.148157	1.82469	0.0680471	0.99901
chr1:1373340-1376454	763.853	-0.0191985	0.12772	-0.150317	0.880515	0.99901
chr1:1397058-1401164	1054.43	-0.0124127	0.127468	-0.0973793	0.922425	0.99901
chr1:1405775-1409030	919.679	-0.016843	0.123261	-0.136645	0.891311	0.99901
chr1:1427521-1428002	47.8541	0.36511	0.148041	2.46628	0.0136523	0.99901
chr1:1435048-1437257	131.632	0.187089	0.146319	1.27864	0.201025	0.99901
chr1:1470176-1473942	759.041	-0.0621499	0.11983	-0.518649	0.604006	0.99901
chr1:1504741-1505998	33.5314	0.236442	0.143218	1.65092	0.0987551	0.99901
chr1:1510965-1513956	608.077	0.1212	0.127232	0.952593	0.340796	0.99901
chr1:1538736-1541153	238.18	0.254233	0.145036	1.7529	0.0796199	0.99901
chr1:1572271-1576363	1098.26	-0.0523502	0.121474	-0.430958	0.666499	0.99901
chr1:1598927-1599920	66.8485	0.132954	0.146358	0.908417	0.363658	0.99901
chr1:1600199-1601838	189.671	0.225709	0.147414	1.53112	0.12574	0.99901
chr1:1613432-1617576	963.813	0.00317335	0.12274	0.0258543	0.979374	0.99901
chr1:1656796-1660314	611.592	-0.193406	0.119436	-1.61932	0.105378	0.99901
chr1:1689134-1690584	30.6247	-0.224365	0.138451	-1.62054	0.105117	0.99901
chr1:1691127-1691876	113.378	-0.123902	0.146729	-0.844429	0.39843	0.99901
chr1:1692208-1693399	263.904	0.0334772	0.142887	0.234292	0.814759	0.99901
chr1:1693768-1694222	17.9362	-0.106869	0.129045	-0.828157	0.407582	0.99901
chr1:1723096-1725319	358.443	-0.155041	0.129697	-1.19541	0.231928	0.99901
chr1:1742504-1745137	121.98	-0.300568	0.145231	-2.06959	0.0384907	0.99901
chr1:1745483-1746691	162.474	0.0399459	0.145171	0.275164	0.78319	0.99901
chr1:1747042-1747431	15.7001	-0.0733742	0.122296	-0.599975	0.548523	0.99901
chr1:1776831-1779541	596.299	0.0736943	0.126629	0.58197	0.560587	0.99901
chr1:1887175-1892986	959.976	0.00344521	0.116744	0.0295108	0.976457	0.99901
chr1:1908046-1910042	234.004	0.147179	0.144813	1.01634	0.30947	0.99901
chr1:1918429-1920124	207.061	0.180166	0.147016	1.22548	0.220394	0.99901
chr1:2003486-2004227	38.6274	0.240469	0.142776	1.68424	0.0921354	0.99901
chr1:2018730-2020567	106.628	0.227376	0.148057	1.53573	0.124605	0.99901
chr1:2044613-2045156	16.8169	0.0427909	0.126295	0.338815	0.734749	0.99901
chr1:2049634-2051353	70.9954	0.140753	0.148397	0.948488	0.342881	0.99901
chr1:2073172-2076357	601.928	0.0544146	0.136171	0.399605	0.689448	0.99901
chr1:2115793-2116751	22.1309	-0.00348448	0.135193	-0.0257742	0.979437	0.99901
chr1:2128063-2129013	34.5856	0.178304	0.13963	1.27697	0.201612	0.99901
chr1:2132457-2133859	50.0752	-0.0167619	0.148305	-0.113023	0.910013	0.99901
chr1:2188897-2191127	177.547	0.0591344	0.147512	0.400878	0.68851	0.99901
chr1:2192901-2195808	263.027	0.050832	0.135651	0.374727	0.707863	0.99901
chr1:2204102-2204897	38.2699	0.112695	0.145117	0.776578	0.437408	0.99901
chr1:2205315-2206032	21.334	0.0471767	0.131376	0.359098	0.719522	0.99901
chr1:2212036-2213646	76.1685	-0.0867913	0.148917	-0.582817	0.560017	0.99901
chr1:2226712-2228013	142.505	0.23018	0.14861	1.54888	0.12141	0.99901
chr1:2228707-2234669	1154.1	0.0504007	0.130857	0.385157	0.700121	0.99901
chr1:2314315-2315683	41.57	0.225558	0.143739	1.56922	0.116597	0.99901
chr1:2389991-2393697	843.353	-0.0733345	0.122223	-0.600004	0.548503	0.99901
chr1:2411297-2413975	532.96	0.0987452	0.14359	0.687691	0.491648	0.99901
chr1:2443000-2445387	170.126	0.27055	0.1436	1.88405	0.0595583	0.99901
chr1:2446375-2447021	13.6133	0.0333458	0.115508	0.288688	0.77282	0.99901
chr1:2467156-2467855	47.4382	0.229344	0.147041	1.55972	0.118826	0.99901
chr1:2524169-2531483	1070.27	0.0306947	0.127869	0.240048	0.810293	0.99901
chr1:2543279-2544169	17.4662	-0.0107945	0.123451	-0.0874397	0.930322	0.99901
chr1:2545847-2548102	87.9201	-0.112762	0.1489	-0.757299	0.44887	0.99901
chr1:2585019-2588222	680.326	0.155691	0.13451	1.15747	0.247082	0.99901
chr1:2628730-2629708	46.7273	0.37857	0.145419	2.6033	0.00923305	0.99901
chr1:2641490-2644091	561.86	0.0823793	0.140701	0.585492	0.558217	0.99901
chr1:2659833-2660127	12.6574	0.136533	0.108221	1.26161	0.207087	0.99901
chr1:3063494-3064615	24.8523	0.018244	0.135218	0.134923	0.892673	0.99901
chr1:3065610-3074559	680.608	0.156144	0.136234	1.14615	0.251735	0.99901
chr1:3218832-3219655	15.0008	0.0243624	0.121947	0.199779	0.841654	0.99901
chr1:3226888-3227695	21.4771	0.046538	0.133251	0.34925	0.726902	0.99901
chr1:3352139-3352605	12.8581	0.0222875	0.114864	0.194033	0.84615	0.99901
chr1:3393219-3394117	24.38	0.0227186	0.135815	0.167277	0.867152	0.99901
chr1:3454099-3455390	117.011	0.254467	0.147746	1.72233	0.0850096	0.99901
chr1:3530095-3532044	134.078	0.292234	0.146945	1.98873	0.046731	0.99901
chr1:3610247-3612067	140.697	0.178635	0.145501	1.22773	0.21955	0.99901
chr1:3622949-3626466	648.168	0.0625113	0.137806	0.453618	0.650104	0.99901
chr1:3648529-3650553	432.941	-0.0861919	0.130839	-0.65876	0.51005	0.99901
chr1:3651327-3653273	63.1435	0.102385	0.146802	0.697438	0.485529	0.99901
chr1:3745060-3748124	415.52	0.0385764	0.135674	0.284332	0.776156	0.99901
chr1:3771500-3773154	78.432	0.163578	0.148773	1.09951	0.271546	0.99901
chr1:3793657-3797701	740.673	0.0111584	0.117656	0.0948391	0.924443	0.99901
chr1:3898252-3901800	763.884	0.00235281	0.126855	0.0185473	0.985202	0.99901
chr1:4653414-4659657	693.76	0.0615584	0.123291	0.499293	0.617573	0.99901
chr1:4710800-4711541	20.8575	0.152239	0.129659	1.17415	0.240335	0.99901
chr1:5744563-5745672	48.6123	0.0606233	0.148068	0.40943	0.682224	0.99901
chr1:5896103-5897827	40.8931	-0.0334779	0.143649	-0.233053	0.81572	0.99901
chr1:5990221-5994782	925.498	0.0685054	0.124794	0.548946	0.583043	0.99901
chr1:6034180-6034778	15.8066	0.0332808	0.121136	0.274739	0.783517	0.99901
chr1:6148549-6149279	17.4428	-0.132549	0.124287	-1.06648	0.286209	0.99901
chr1:6163972-6164861	26.6642	0.113467	0.137731	0.823829	0.410037	0.99901
chr1:6177955-6181203	300.379	0.19589	0.137346	1.42625	0.153797	0.99901
chr1:6197518-6200493	795.9	-0.0564758	0.119768	-0.471541	0.637254	0.99901
chr1:6205587-6206345	17.5397	0.0888184	0.119683	0.742115	0.458017	0.99901
chr1:6208494-6210173	135.342	0.229648	0.148292	1.54862	0.121473	0.99901
chr1:6233955-6236579	358.008	0.00285441	0.127025	0.0224713	0.982072	0.99901
chr1:6241837-6242578	27.6785	0.0902996	0.138241	0.653202	0.513626	0.99901
chr1:6244632-6246638	141.782	0.174678	0.142487	1.22592	0.220228	0.99901
chr1:6259352-6261824	454.219	0.203489	0.132597	1.53464	0.124873	0.99901
chr1:6276102-6276842	16.5507	0.116502	0.122221	0.953213	0.340482	0.99901
chr1:6338499-6339243	18.7652	-0.0847294	0.12377	-0.684569	0.493616	0.99901
chr1:6358896-6359581	14.7251	0.0208748	0.105878	0.197159	0.843703	0.99901
chr1:6390941-6394964	691.636	0.00873114	0.121063	0.0721207	0.942506	0.99901
chr1:6418692-6420609	66.6518	0.185696	0.147812	1.2563	0.209008	0.99901
chr1:6440153-6440990	22.2781	0.0738382	0.130268	0.566818	0.570838	0.99901
chr1:6447290-6448176	19.6219	0.168046	0.128832	1.30439	0.192102	0.99901
chr1:6484668-6486520	108.419	0.267117	0.147773	1.80761	0.0706668	0.99901
chr1:6489765-6491600	261.444	0.0751775	0.141684	0.530601	0.595695	0.99901
chr1:6496063-6498396	263.086	0.293918	0.142347	2.0648	0.038942	0.99901
chr1:6552680-6555001	669.976	-0.0927512	0.123799	-0.74921	0.45373	0.99901
chr1:6578993-6582054	451.881	0.0746765	0.133047	0.561281	0.574606	0.99901
chr1:6599639-6604477	1080.8	0.142339	0.125782	1.13163	0.257788	0.99901
chr1:6611514-6616858	926.121	0.163847	0.118257	1.38552	0.165894	0.99901
chr1:6624608-6626941	454.283	0.177804	0.131428	1.35287	0.176099	0.99901
chr1:6699958-6702298	684.864	-0.0606367	0.131702	-0.460407	0.645224	0.99901
chr1:6783306-6785111	502.139	-0.0403288	0.122783	-0.328455	0.742567	0.99901
chr1:6785431-6787903	362.451	0.0133515	0.134638	0.0991657	0.921007	0.99901
chr1:7247589-7248536	15.8673	-0.111048	0.124129	-0.894616	0.370992	0.99901
chr1:7379377-7380155	22.1805	0.0222793	0.130809	0.17032	0.864758	0.99901
chr1:7667832-7668370	15.1602	0.0349431	0.120975	0.288847	0.772699	0.99901
chr1:7668780-7669568	36.8974	0.206921	0.142373	1.45338	0.146118	0.99901
chr1:7669844-7670825	18.862	-0.0215323	0.128088	-0.168106	0.8665	0.99901
chr1:7679645-7681692	190.171	0.120091	0.141346	0.849621	0.395536	0.99901
chr1:7701112-7708545	760.52	0.121961	0.115288	1.05788	0.29011	0.99901
chr1:7770060-7773730	667.384	-0.0201426	0.124048	-0.162377	0.871009	0.99901
chr1:7782824-7784973	214.837	0.147586	0.137765	1.07129	0.28404	0.99901
chr1:7942014-7942748	25.2108	0.105606	0.134268	0.786527	0.431559	0.99901
chr1:7960363-7963354	793.594	-0.0850428	0.130597	-0.651183	0.514928	0.99901
chr1:8022907-8027529	815.594	0.0581985	0.115953	0.501912	0.615729	0.99901
chr1:8217045-8217831	20.8357	0.0571467	0.133265	0.428819	0.668055	0.99901
chr1:8317462-8319691	405.707	0.0976908	0.133761	0.730341	0.465182	0.99901
chr1:8370119-8371593	40.1846	-0.135838	0.14631	-0.92843	0.353184	0.99901
chr1:8373501-8374158	16.0466	0.0929092	0.126015	0.737286	0.460948	0.99901
chr1:8421575-8425201	394.635	0.0905741	0.123947	0.730749	0.464932	0.99901
chr1:8459989-8460987	23.7951	0.156528	0.135252	1.15731	0.247146	0.99901
chr1:8523759-8526832	302.741	-0.0209416	0.145195	-0.144231	0.885318	0.99901
chr1:8577839-8578826	17.9488	0.0435194	0.120111	0.362328	0.717107	0.99901
chr1:8620995-8622477	30.3306	0.0260692	0.135342	0.192617	0.847259	0.99901
chr1:8628718-8629880	27.8905	0.0607374	0.137231	0.442593	0.65806	0.99901
chr1:8631543-8632737	31.3666	-0.0314176	0.138483	-0.226869	0.820525	0.99901
chr1:8641290-8641735	13.0325	-0.0316276	0.115483	-0.273873	0.784182	0.99901
chr1:8679627-8681456	37.3091	-0.0184482	0.142029	-0.12989	0.896653	0.99901
chr1:8697768-8705591	901.697	-0.166023	0.136756	-1.214	0.224747	0.99901
chr1:8707233-8707817	14.1375	0.024575	0.11773	0.20874	0.834651	0.99901
chr1:8711720-8713145	55.3103	-0.184582	0.145207	-1.27116	0.203671	0.99901
chr1:8752550-8756114	124.656	-0.0392616	0.147822	-0.2656	0.790547	0.99901
chr1:8811761-8819407	1785.03	-0.123203	0.14025	-0.878451	0.379699	0.99901
chr1:8867918-8880297	1272.66	-0.185942	0.118756	-1.56574	0.117409	0.99901
chr1:9128200-9129876	88.1148	0.166922	0.148689	1.12263	0.261596	0.99901
chr1:9180899-9183944	245.246	0.15592	0.138192	1.12828	0.259202	0.99901
chr1:9198537-9198866	15.1076	0.0690599	0.121269	0.569478	0.569032	0.99901
chr1:9200961-9202977	115.873	0.0801154	0.145143	0.551975	0.580965	0.99901
chr1:9233951-9236356	392.622	0.144235	0.128668	1.12099	0.262291	0.99901
chr1:9292188-9294581	247.297	0.294969	0.142249	2.07362	0.0381149	0.99901
chr1:9428137-9429899	271.044	-0.182703	0.132636	-1.37747	0.168367	0.99901
chr1:9495116-9495769	24.7905	0.0565153	0.132748	0.425733	0.670302	0.99901
chr1:9538855-9541585	410.096	0.0311411	0.137689	0.22617	0.821069	0.99901
chr1:9588163-9592478	475.698	0.0713374	0.128551	0.554935	0.578939	0.99901
chr1:9592900-9594333	35.6965	0.168863	0.140454	1.20227	0.229259	0.99901
chr1:9651046-9652821	255.116	0.0578866	0.137617	0.420636	0.674021	0.99901
chr1:9687059-9690943	384.091	0.0527499	0.13203	0.39953	0.689503	0.99901
chr1:9820258-9824965	1033.34	-0.057885	0.120122	-0.481885	0.629887	0.99901
chr1:9908610-9911621	548.602	0.0747779	0.122716	0.609358	0.542287	0.99901
chr1:9941819-9944612	879.287	-0.169198	0.123245	-1.37286	0.169797	0.99901
chr1:9996570-9998345	89.3072	0.151003	0.148768	1.01502	0.310095	0.99901
chr1:10032047-10036582	1143.39	-0.184483	0.132557	-1.39173	0.164004	0.99901
chr1:10178235-10180266	50.0067	-0.168725	0.147646	-1.14276	0.253136	0.99901
chr1:10209221-10215008	1416.96	-0.0394728	0.117603	-0.335644	0.73714	0.99901
chr1:10397588-10401873	1061.91	-0.0320328	0.124617	-0.25705	0.79714	0.99901
chr1:10429856-10432449	602.993	0.0147312	0.121053	0.121691	0.903143	0.99901
chr1:10470841-10473126	472.759	-0.0338152	0.132008	-0.256161	0.797826	0.99901
chr1:10474387-10476752	476.232	-0.0541869	0.125434	-0.431997	0.665744	0.99901
chr1:10637987-10639143	38.0949	0.0306092	0.14472	0.211506	0.832492	0.99901
chr1:10693011-10695429	155.825	0.194682	0.14291	1.36227	0.173112	0.99901
chr1:10734350-10735752	42.3756	-0.0575829	0.146961	-0.391824	0.695188	0.99901
chr1:10793216-10797066	338.231	0.0918967	0.138817	0.661999	0.507972	0.99901
chr1:10866470-10868108	83.4462	0.223301	0.148164	1.50712	0.131779	0.99901
chr1:10968194-10968929	14.0142	-0.0170688	0.120194	-0.142011	0.887071	0.99901
chr1:11011734-11015354	862.409	-0.118581	0.118876	-0.997515	0.318515	0.99901
chr1:11058551-11062018	733.176	0.0561789	0.125931	0.446109	0.655518	0.99901
chr1:11098068-11100440	659.96	-0.0332959	0.120357	-0.276642	0.782055	0.99901
chr1:11260920-11263393	669.348	-0.147973	0.121828	-1.2146	0.224519	0.99901
chr1:11272041-11277078	755.257	-0.0143765	0.118213	-0.121615	0.903204	0.99901
chr1:11337468-11337990	13.5059	-0.108525	0.118064	-0.919203	0.357989	0.99901
chr1:11338264-11340369	64.4323	-0.153931	0.148908	-1.03373	0.301261	0.99901
chr1:11354969-11356540	37.4831	0.036437	0.143458	0.253991	0.799503	0.99901
chr1:11478346-11483286	888.499	0.036603	0.130182	0.281167	0.778582	0.99901
chr1:11498866-11500665	77.8185	-0.0120078	0.148738	-0.0807312	0.935656	0.99901
chr1:11653970-11656574	336.275	0.0512586	0.12899	0.397386	0.691083	0.99901
chr1:11663926-11665171	78.7991	0.330033	0.148402	2.22391	0.0261546	0.99901
chr1:11679154-11682698	603.584	0.0656614	0.13329	0.49262	0.622281	0.99901
chr1:11688689-11694122	827.408	0.0164243	0.119488	0.137455	0.890671	0.99901
chr1:11700861-11702262	30.5659	0.120635	0.142659	0.84562	0.397765	0.99901
chr1:11735706-11737467	278.183	-0.0659549	0.13824	-0.477106	0.633287	0.99901
chr1:11802035-11809637	1506.33	-0.11118	0.109683	-1.01365	0.310748	0.99901
chr1:11858920-11859719	19.8388	0.00677107	0.12685	0.0533785	0.95743	0.99901
chr1:11907879-11910222	292.837	-0.0264911	0.133347	-0.198663	0.842526	0.99901
chr1:11920906-11922003	21.9538	-0.0120809	0.130761	-0.0923893	0.926389	0.99901
chr1:11923511-11926933	560.85	0.00754079	0.129481	0.0582388	0.953558	0.99901
chr1:11933992-11935472	157.871	0.228501	0.141141	1.61895	0.105459	0.99901
chr1:11979285-11982055	635.935	-0.033389	0.126666	-0.263599	0.792089	0.99901
chr1:12018500-12020953	527.98	0.0219103	0.135662	0.161507	0.871694	0.99901
chr1:12063362-12063928	16.3253	0.0940645	0.122558	0.767511	0.442777	0.99901
chr1:12229604-12232471	659.542	-0.0171047	0.13767	-0.124244	0.901122	0.99901
chr1:12614992-12619885	478.172	-0.170822	0.122584	-1.3935	0.163468	0.99901
chr1:13512947-13514135	61.2852	0.219249	0.147272	1.48874	0.136557	0.99901
chr1:13583193-13586564	211.353	-0.185105	0.1385	-1.3365	0.181387	0.99901
chr1:13699094-13702558	430.407	-0.0263047	0.123936	-0.212244	0.831917	0.99901
chr1:13748151-13752813	814.189	-0.0566577	0.131051	-0.432332	0.6655	0.99901
chr1:13891890-13893921	135.584	0.0574841	0.144225	0.398574	0.690207	0.99901
chr1:14026605-14027679	27.5159	-0.0558771	0.136223	-0.410188	0.681668	0.99901
chr1:14597592-14603532	1246.83	-0.00285437	0.117327	-0.0243284	0.980591	0.99901
chr1:14624772-14626688	70.3759	-0.0631083	0.148891	-0.423855	0.671672	0.99901
chr1:14875814-14876474	15.3945	0.00666883	0.124665	0.0534939	0.957338	0.99901
chr1:14923679-14924284	16.8599	0.162375	0.125461	1.29423	0.195587	0.99901
chr1:14924517-14926092	196.821	0.0247169	0.140791	0.175558	0.860641	0.99901
chr1:15152031-15154848	563.575	0.0670368	0.134727	0.497576	0.618783	0.99901
chr1:15246792-15248160	101.744	0.0723337	0.148882	0.485845	0.627077	0.99901
chr1:15384260-15384872	15.7274	0.0545313	0.118098	0.461747	0.644263	0.99901
chr1:15408734-15412185	435.756	0.168781	0.134858	1.25155	0.210736	0.99901
chr1:15522572-15528650	1166.58	-0.0302628	0.117938	-0.2566	0.797488	0.99901
chr1:15584484-15585251	27.2933	0.101062	0.130211	0.77614	0.437666	0.99901
chr1:15601775-15604351	344.11	0.199818	0.129168	1.54696	0.121872	0.99901
chr1:15616469-15620388	676.707	-0.0739826	0.11761	-0.629049	0.529317	0.99901
chr1:15683597-15686753	540.44	-0.0190944	0.127788	-0.149423	0.88122	0.99901
chr1:15757187-15761200	396.538	0.210125	0.131451	1.5985	0.109933	0.99901
chr1:15832481-15836888	998.451	-0.0371011	0.123316	-0.300862	0.76352	0.99901
chr1:15843251-15845896	138.365	-0.180237	0.148917	-1.21032	0.226157	0.99901
chr1:15846094-15853579	1763.03	-0.117588	0.124875	-0.94164	0.346377	0.99901
chr1:15885175-15888055	136.127	-0.296901	0.145605	-2.03909	0.0414415	0.99901
chr1:15973628-15976535	490.079	0.0210951	0.12678	0.166392	0.867849	0.99901
chr1:16026454-16027272	21.6558	0.207242	0.13349	1.55249	0.120545	0.99901
chr1:16048355-16049177	17.1579	0.0284326	0.125285	0.226942	0.820468	0.99901
chr1:16072638-16074336	152.475	0.306486	0.1459	2.10066	0.0356706	0.99901
chr1:16154596-16156441	218.427	0.202434	0.141539	1.43023	0.15265	0.99901
chr1:16167002-16168247	93.6515	0.161432	0.14891	1.08409	0.278325	0.99901
chr1:16205876-16207578	177.344	0.178064	0.141922	1.25466	0.209602	0.99901
chr1:16216148-16217820	44.0607	0.0592608	0.147498	0.401773	0.687851	0.99901
chr1:16226667-16227864	43.286	-0.014049	0.146193	-0.0960991	0.923442	0.99901
chr1:16235941-16238086	343.108	-0.0224912	0.132889	-0.169248	0.865602	0.99901
chr1:16347379-16353141	1191.41	-0.101924	0.122472	-0.832222	0.405284	0.99901
chr1:16366591-16369467	715.552	-0.0952393	0.124126	-0.767282	0.442914	0.99901
chr1:16440232-16442770	622.752	-0.0852461	0.127025	-0.671099	0.502158	0.99901
chr1:16497431-16500459	534.814	0.182069	0.126182	1.44291	0.149047	0.99901
chr1:16512255-16515689	456.737	-0.108721	0.129074	-0.842316	0.399611	0.99901
chr1:16534113-16536160	59.51	0.0430155	0.14888	0.288927	0.772637	0.99901
chr1:16540322-16541183	37.2044	-0.102624	0.145523	-0.705206	0.480682	0.99901
chr1:16545897-16546743	40.6923	-0.0208918	0.141393	-0.147756	0.882535	0.99901
chr1:16609475-16615236	2666.97	-0.00710921	0.110625	-0.0642643	0.94876	0.99901
chr1:16615402-16616012	14.3198	0.132197	0.10589	1.24844	0.211871	0.99901
chr1:16616577-16619259	201.647	0.167684	0.141961	1.18119	0.237526	0.99901
chr1:16635489-16637385	36.7012	0.161052	0.125313	1.2852	0.198722	0.99901
chr1:16640490-16645681	2416.43	-0.0237393	0.120019	-0.197796	0.843204	0.99901
chr1:16693405-16693882	18.8415	0.0995172	0.119163	0.835138	0.40364	0.99901
chr1:16796069-16797064	31.3802	0.016225	0.137426	0.118064	0.906017	0.99901
chr1:16866932-16867510	13.5217	0.0885597	0.117747	0.752116	0.451981	0.99901
chr1:16872278-16873964	48.5099	0.21118	0.146663	1.43991	0.149894	0.99901
chr1:16888932-16889750	17.2329	0.0763646	0.123058	0.620559	0.53489	0.99901
chr1:16894892-16897553	257.419	-0.0779069	0.138696	-0.561709	0.574314	0.99901
chr1:16903338-16906456	298.278	-0.00476373	0.133958	-0.0355614	0.971632	0.99901
chr1:16913088-16915194	271.832	0.0312113	0.13594	0.229596	0.818406	0.99901
chr1:16921338-16922400	51.6331	0.203923	0.147288	1.38452	0.1662	0.99901
chr1:16960272-16961988	123.329	-0.024324	0.145732	-0.16691	0.867441	0.99901
chr1:16978643-16980944	165.516	0.290698	0.147675	1.96849	0.0490115	0.99901
chr1:17010248-17012852	499.675	0.0157242	0.135265	0.116248	0.907456	0.99901
chr1:17045532-17046350	20.961	-0.146453	0.123232	-1.18844	0.234662	0.99901
chr1:17051764-17054814	541.716	-0.175796	0.122186	-1.43875	0.15022	0.99901
chr1:17060162-17060808	21.7413	-0.00719236	0.132724	-0.0541903	0.956784	0.99901
chr1:17118534-17120145	140.549	0.314303	0.14509	2.16626	0.0302913	0.99901
chr1:17436094-17442030	1028.55	-0.0667458	0.112127	-0.595269	0.551664	0.99901
chr1:17538356-17542605	562.526	0.120994	0.134309	0.900858	0.367664	0.99901
chr1:18107187-18111421	371.892	0.214807	0.137258	1.56499	0.117585	0.99901
chr1:18557593-18558558	34.074	0.035173	0.14048	0.250378	0.802295	0.99901
chr1:18643149-18644147	59.5598	0.0184753	0.147177	0.125531	0.900103	0.99901
chr1:18716578-18717397	33.0521	0.161285	0.142084	1.13514	0.256317	0.99901
chr1:18901346-18903769	525.527	-0.00679929	0.127157	-0.0534718	0.957356	0.99901
chr1:18949533-18950281	13.4327	-0.0520503	0.114089	-0.456226	0.648228	0.99901
chr1:18953517-18957556	552.48	0.184769	0.132635	1.39306	0.163602	0.99901
chr1:19207371-19212567	1424.01	-0.16759	0.119253	-1.40533	0.159922	0.99901
chr1:19249541-19253663	1204.33	-0.0986254	0.1134	-0.869714	0.384457	0.99901
chr1:19310227-19314106	827.604	0.0350726	0.1298	0.270205	0.787003	0.99901
chr1:19405202-19406580	21.5622	-0.0146482	0.129312	-0.113277	0.909811	0.99901
chr1:19481694-19486949	907.49	0.0530288	0.129985	0.407962	0.683302	0.99901
chr1:19595496-19598908	880.168	-0.0210561	0.115354	-0.182534	0.855163	0.99901
chr1:19643452-19646250	421.698	0.164523	0.137453	1.19694	0.231331	0.99901
chr1:19659643-19659977	12.4641	-0.0944912	0.116854	-0.808625	0.418731	0.99901
chr1:19664345-19666068	142.283	0.278135	0.148428	1.87387	0.0609479	0.99901
chr1:19799502-19800427	36.8012	0.161002	0.141966	1.13409	0.256759	0.99901
chr1:19881864-19885337	802.78	-0.037358	0.115278	-0.324069	0.745886	0.99901
chr1:20152150-20152561	27.714	0.0806386	0.13996	0.576156	0.56451	0.99901
chr1:20185695-20186798	44.7304	0.080802	0.142845	0.565663	0.571623	0.99901
chr1:20233415-20234889	66.846	-0.0747896	0.148897	-0.50229	0.615464	0.99901
chr1:20291542-20292122	14.1885	0.081939	0.112732	0.726849	0.467318	0.99901
chr1:20365742-20367568	138.274	0.175945	0.144003	1.22181	0.221778	0.99901
chr1:20410124-20411280	21.8403	0.0330678	0.134895	0.245137	0.80635	0.99901
chr1:20481544-20487797	1491.23	0.0418175	0.119004	0.351397	0.725291	0.99901
chr1:20506260-20508946	753.34	-0.187242	0.121728	-1.5382	0.124	0.99901
chr1:20530177-20531623	41.6822	0.0653068	0.146501	0.445778	0.655758	0.99901
chr1:20550869-20556216	618.854	0.188176	0.124365	1.5131	0.130254	0.99901
chr1:20632862-20636204	608.149	-0.0280005	0.126674	-0.221044	0.825058	0.99901
chr1:20659619-20662546	877.115	-0.0921191	0.122927	-0.74938	0.453628	0.99901
chr1:20696152-20697630	150.791	0.051672	0.147426	0.350495	0.725968	0.99901
chr1:20716872-20718476	132.564	0.320417	0.146782	2.18294	0.0290402	0.99901
chr1:20729739-20733659	360.374	0.182293	0.142646	1.27794	0.20127	0.99901
chr1:20780324-20781737	33.8457	0.048624	0.140014	0.347278	0.728382	0.99901
chr1:20784033-20788589	1297.57	-0.116515	0.117508	-0.99155	0.321417	0.99901
chr1:21149128-21150895	64.9572	0.0767285	0.148536	0.516566	0.605459	0.99901
chr1:21171360-21177771	1217.91	-0.0887514	0.128176	-0.692419	0.488674	0.99901
chr1:21198452-21199959	48.13	-0.108223	0.147581	-0.733307	0.463371	0.99901
chr1:21289547-21291307	217.149	0.194752	0.138439	1.40677	0.159495	0.99901
chr1:21342868-21347539	567.846	0.137171	0.124798	1.09914	0.271706	0.99901
chr1:21427799-21428577	24.1792	0.197477	0.135238	1.46022	0.144231	0.99901
chr1:21439244-21442375	568.184	-0.0565309	0.121379	-0.465738	0.641403	0.99901
chr1:21508809-21510464	86.4656	0.00631918	0.14807	0.0426769	0.965959	0.99901
chr1:21618848-21623216	274.978	0.00726088	0.135007	0.0537813	0.957109	0.99901
chr1:21650528-21652593	102.128	0.0742716	0.148767	0.499248	0.617605	0.99901
chr1:21658441-21660182	92.6414	0.0328546	0.146633	0.224061	0.82271	0.99901
chr1:21667270-21669941	316.344	0.151288	0.137608	1.09941	0.271587	0.99901
chr1:21780213-21784163	1180.93	-0.0506438	0.11358	-0.445887	0.655679	0.99901
chr1:21814236-21814693	17.0031	0.0479415	0.12432	0.38563	0.699771	0.99901
chr1:21936016-21938167	210.988	0.12777	0.138777	0.920686	0.357214	0.99901
chr1:22023908-22027116	654.645	-0.0294911	0.127363	-0.231552	0.816886	0.99901
chr1:22052120-22057016	741.383	-0.0271879	0.119893	-0.226767	0.820605	0.99901
chr1:22140938-22144337	331.092	0.250519	0.138846	1.80429	0.0711852	0.99901
chr1:22350270-22350736	16.5723	0.0345304	0.124983	0.27628	0.782333	0.99901
chr1:22451166-22453938	543.229	-0.102899	0.123516	-0.833087	0.404796	0.99901
chr1:22562898-22563368	33.4169	0.222454	0.141438	1.5728	0.115765	0.99901
chr1:22563734-22565105	106.781	0.184679	0.146148	1.26364	0.206358	0.99901
chr1:22709443-22713173	452.935	0.0454353	0.132126	0.34388	0.730937	0.99901
chr1:23018462-23024054	1422.44	-0.14996	0.123999	-1.20936	0.226525	0.99901
chr1:23165506-23169271	656.891	-0.0354719	0.119152	-0.297702	0.765931	0.99901
chr1:23177374-23178490	92.1235	-0.0454187	0.148728	-0.305382	0.760075	0.99901
chr1:23216085-23217908	152.981	0.207647	0.145851	1.42369	0.154535	0.99901
chr1:23337804-23345762	1672.8	-0.213434	0.141033	-1.51337	0.130186	0.99901
chr1:23356338-23357231	19.3854	0.0386184	0.1312	0.294347	0.768493	0.99901
chr1:23365533-23372244	1446.18	-0.0497261	0.116053	-0.428476	0.668304	0.99901
chr1:23424388-23425102	16.6281	-0.00725545	0.126948	-0.057153	0.954423	0.99901
chr1:23482764-23485050	401.189	0.132235	0.133409	0.991201	0.321588	0.99901
chr1:23528723-23532083	385.257	-0.137319	0.135734	-1.01168	0.311693	0.99901
chr1:23554178-23556155	252.505	0.115788	0.131661	0.87944	0.379163	0.99901
chr1:23558056-23560166	166.308	-0.0497125	0.1463	-0.339798	0.734009	0.99901
chr1:23567809-23569038	65.8117	0.100287	0.148879	0.673612	0.500558	0.99901
chr1:23619254-23620195	37.1068	0.00451391	0.143525	0.0314502	0.97491	0.99901
chr1:23691170-23694209	622.598	-0.14742	0.125799	-1.17187	0.24125	0.99901
chr1:23742654-23746186	951.296	-0.0662534	0.119691	-0.553539	0.579894	0.99901
chr1:23772292-23772776	12.9344	0.0616818	0.108676	0.567573	0.570325	0.99901
chr1:23777101-23780308	894.114	-0.136315	0.120235	-1.13373	0.256906	0.99901
chr1:23790356-23792978	560.228	0.031917	0.133455	0.239159	0.810982	0.99901
chr1:23798948-23802022	722.914	0.116699	0.135267	0.862732	0.388285	0.99901
chr1:23824211-23826555	504.328	-0.129624	0.125787	-1.0305	0.302774	0.99901
chr1:23838026-23839236	44.5159	0.135099	0.146953	0.91933	0.357923	0.99901
chr1:23866441-23868757	508.953	0.0390902	0.131281	0.297761	0.765886	0.99901
chr1:23902540-23903708	39.8637	0.052323	0.143766	0.363947	0.715898	0.99901
chr1:23958353-23962716	1275.34	-0.19529	0.1302	-1.49992	0.133635	0.99901
chr1:23975474-23981263	1175.02	-0.225791	0.14	-1.6128	0.106789	0.99901
chr1:24150518-24152029	41.4607	-0.0431745	0.145361	-0.297015	0.766455	0.99901
chr1:24186247-24188259	191.907	0.144151	0.140377	1.02689	0.304474	0.99901
chr1:24321367-24322845	66.5605	0.128773	0.147304	0.874202	0.382008	0.99901
chr1:24413104-24414005	57.8435	0.0643986	0.148908	0.432471	0.665399	0.99901
chr1:24414994-24417878	463.623	-0.123741	0.124757	-0.99186	0.321266	0.99901
chr1:24468508-24469499	20.5101	-0.0365672	0.131715	-0.277624	0.781301	0.99901
chr1:24501671-24504907	429.805	0.0664388	0.125434	0.52967	0.59634	0.99901
chr1:24555835-24556427	13.6713	0.0440009	0.121212	0.363008	0.716599	0.99901
chr1:24641417-24645830	1223.79	-0.0957224	0.122292	-0.782739	0.433781	0.99901
chr1:24744389-24749510	1198.51	-0.110322	0.118256	-0.932911	0.350866	0.99901
chr1:24847899-24849030	99.4182	0.101088	0.148298	0.681655	0.495457	0.99901
chr1:25230596-25234238	1028.36	-0.136162	0.123076	-1.10632	0.268587	0.99901
chr1:25239406-25241192	240.271	-0.00524352	0.135394	-0.0387279	0.969107	0.99901
chr1:25244507-25248408	1135.79	-0.089581	0.120981	-0.740457	0.459023	0.99901
chr1:25266018-25268436	318.215	-0.14169	0.135505	-1.04564	0.295725	0.99901
chr1:25336281-25341129	1512.32	-0.122981	0.123606	-0.994943	0.319764	0.99901
chr1:25428837-25436998	1564.21	-0.129592	0.129956	-0.997204	0.318666	0.99901
chr1:25543239-25544597	109.397	0.134461	0.148206	0.907257	0.364271	0.99901
chr1:25608460-25608824	15.1063	-0.00572755	0.122792	-0.0466442	0.962797	0.99901
chr1:25615773-25619855	406.815	0.0279641	0.132804	0.210567	0.833225	0.99901
chr1:25799372-25801442	157.841	0.285504	0.141177	2.02232	0.0431435	0.99901
chr1:25818721-25822067	971.453	-0.0301978	0.124146	-0.243244	0.807817	0.99901
chr1:25858388-25860187	322.743	-0.0747693	0.128781	-0.580593	0.561515	0.99901
chr1:25874365-25876160	120.674	0.13533	0.147056	0.920258	0.357438	0.99901
chr1:25895558-25896495	18.3626	-0.0556499	0.127101	-0.437841	0.661501	0.99901
chr1:25897489-25908676	2047.62	-0.185603	0.13503	-1.37454	0.169274	0.99901
chr1:25921810-25924420	154.9	0.208679	0.1397	1.49376	0.135238	0.99901
chr1:25927178-25928207	22.652	0.0499605	0.13202	0.378431	0.705111	0.99901
chr1:25996858-25998956	288.247	-0.15592	0.12982	-1.20105	0.229731	0.99901
chr1:26021496-26022491	109.504	0.0553189	0.148778	0.371821	0.710026	0.99901
chr1:26034582-26036567	560.485	-0.0458816	0.137796	-0.332967	0.739159	0.99901
chr1:26045701-26046423	30.998	0.0747616	0.138719	0.538944	0.589926	0.99901
chr1:26109872-26114047	1111.06	0.0206748	0.119352	0.173225	0.862475	0.99901
chr1:26160972-26162526	125.557	-0.119659	0.14754	-0.811023	0.417352	0.99901
chr1:26163766-26164917	68.3283	0.302851	0.147793	2.04915	0.0404471	0.99901
chr1:26169083-26171294	392.961	-0.00944818	0.135629	-0.0696619	0.944463	0.99901
chr1:26233498-26236783	682.213	-0.0355513	0.120922	-0.294002	0.768756	0.99901
chr1:26278808-26282578	473.602	0.102926	0.141675	0.726492	0.467537	0.99901
chr1:26305591-26307471	391.127	0.0449467	0.13226	0.339837	0.733979	0.99901
chr1:26335228-26337118	207.785	0.173437	0.136048	1.27482	0.202374	0.99901
chr1:26359997-26360917	36.3812	0.128672	0.142857	0.900704	0.367746	0.99901
chr1:26430266-26434614	666.89	-0.120309	0.126613	-0.950208	0.342007	0.99901
chr1:26470542-26476298	1308.31	-0.156676	0.113396	-1.38167	0.167074	0.99901
chr1:26499823-26501999	499.71	0.0780378	0.137801	0.56631	0.571183	0.99901
chr1:26528951-26531618	271.139	0.158198	0.137687	1.14897	0.250569	0.99901
chr1:26618540-26622773	691.643	-0.111927	0.117028	-0.956411	0.338865	0.99901
chr1:26690852-26691278	12.9099	0.123873	0.117023	1.05854	0.289811	0.99901
chr1:26691835-26704347	2558.02	-0.0701047	0.113602	-0.617107	0.537164	0.99901
chr1:26705815-26706891	27.4918	-0.0198401	0.129345	-0.153389	0.878091	0.99901
chr1:26722768-26725187	69.3147	-0.167246	0.148866	-1.12346	0.26124	0.99901
chr1:26786424-26789823	616.209	-0.0228323	0.125675	-0.181678	0.855835	0.99901
chr1:26825563-26830292	458.425	0.0901327	0.124945	0.721377	0.470677	0.99901
chr1:26864380-26865962	286.229	-0.0443977	0.140958	-0.314971	0.752783	0.99901
chr1:26888746-26890986	566.964	-0.0857647	0.14555	-0.589246	0.555696	0.99901
chr1:26898708-26901420	766.314	-0.219366	0.120432	-1.82149	0.068533	0.99901
chr1:26921002-26923487	608.027	-0.0249818	0.119072	-0.209804	0.833821	0.99901
chr1:26959666-26960832	156.797	0.0712907	0.144103	0.494722	0.620796	0.99901
chr1:26992873-26995743	450.326	0.271683	0.137668	1.97347	0.0484415	0.99901
chr1:26997813-26998216	15.0545	0.0166177	0.123485	0.134572	0.89295	0.99901
chr1:27012469-27013600	25.1005	-0.122451	0.136333	-0.898174	0.369093	0.99901
chr1:27031336-27031996	17.679	-0.0343654	0.128265	-0.267925	0.788757	0.99901
chr1:27057670-27058651	18.8142	-0.0972756	0.129702	-0.74999	0.453261	0.99901
chr1:27151881-27155622	276.089	0.0223487	0.135893	0.164458	0.86937	0.99901
chr1:27233876-27236946	466.522	0.16365	0.124003	1.31972	0.186928	0.99901
chr1:27321266-27324131	779.466	-0.162772	0.117088	-1.39017	0.164478	0.99901
chr1:27349346-27350409	77.4961	0.210597	0.148643	1.4168	0.156542	0.99901
chr1:27360171-27360969	19.5374	0.0847525	0.130702	0.648439	0.516701	0.99901
chr1:27365158-27367341	159.473	0.127543	0.143214	0.890578	0.373155	0.99901
chr1:27391672-27393678	248.651	0.0853897	0.137651	0.620333	0.535038	0.99901
chr1:27487840-27491069	687.103	-0.0827978	0.119922	-0.690431	0.489923	0.99901
chr1:27527097-27528602	49.361	0.0401368	0.142063	0.282527	0.777539	0.99901
chr1:27561642-27562267	15.0291	0.0855737	0.121067	0.706829	0.479673	0.99901
chr1:27566801-27568284	37.2806	0.0213062	0.144131	0.147825	0.882481	0.99901
chr1:27570996-27573325	70.8982	0.153903	0.148758	1.03459	0.300862	0.99901
chr1:27575129-27576597	33.8317	0.0828142	0.141863	0.583762	0.55938	0.99901
chr1:27591858-27595242	96.2623	0.0969758	0.148915	0.651215	0.514907	0.99901
chr1:27597581-27598222	14.7204	0.125914	0.122104	1.0312	0.302447	0.99901
chr1:27598700-27605001	938.381	0.0825907	0.128488	0.642787	0.520362	0.99901
chr1:27633767-27634511	19.3893	-0.0354974	0.126682	-0.280209	0.779317	0.99901
chr1:27659604-27660677	44.7798	-0.0339825	0.147398	-0.230548	0.817666	0.99901
chr1:27669188-27669732	27.8985	0.187505	0.139368	1.34539	0.178499	0.99901
chr1:27671549-27672968	106.3	-0.00281407	0.145333	-0.0193629	0.984552	0.99901
chr1:27724929-27727649	562.219	-0.0821157	0.127647	-0.643304	0.520027	0.99901
chr1:27772339-27775845	703.038	-0.135912	0.117032	-1.16133	0.24551	0.99901
chr1:27829805-27834135	960.74	-0.208293	0.123182	-1.69094	0.0908477	0.99901
chr1:27872008-27873294	154.201	0.216524	0.145573	1.48739	0.136911	0.99901
chr1:27913362-27915480	481.374	-0.154326	0.122606	-1.25872	0.208133	0.99901
chr1:27934636-27936090	75.9629	0.113515	0.148772	0.763014	0.445455	0.99901
chr1:27959392-27960845	41.7312	0.0654062	0.146282	0.447123	0.654786	0.99901
chr1:27981031-27982000	18.6951	0.0655625	0.121452	0.539824	0.589318	0.99901
chr1:28086033-28089520	875.764	-0.115047	0.117277	-0.980989	0.326598	0.99901
chr1:28104512-28105381	42.5698	-0.0638385	0.145011	-0.440231	0.65977	0.99901
chr1:28231146-28233452	627.474	-0.067735	0.120928	-0.560128	0.575392	0.99901
chr1:28235151-28238186	698.323	-0.0863822	0.120895	-0.714521	0.474905	0.99901
chr1:28245640-28247741	217.889	-0.205915	0.147636	-1.39475	0.163091	0.99901
chr1:28248715-28249118	12.6976	0.0309412	0.112923	0.274003	0.784083	0.99901
chr1:28259142-28261924	700.215	0.0210026	0.133844	0.156918	0.875309	0.99901
chr1:28328081-28330289	445.67	-0.193189	0.127371	-1.51674	0.129332	0.99901
chr1:28368929-28373920	895.845	-0.0524043	0.117224	-0.447043	0.654844	0.99901
chr1:28504981-28508793	1111.2	-0.248526	0.130553	-1.90364	0.0569572	0.99901
chr1:28517576-28519910	433.617	-0.0562984	0.132432	-0.425111	0.670756	0.99901
chr1:28551874-28555070	650.786	-0.0789818	0.122425	-0.645142	0.518835	0.99901
chr1:28579175-28583133	987.975	-0.10775	0.116032	-0.928623	0.353084	0.99901
chr1:28592230-28593117	47.5741	0.257145	0.14802	1.73723	0.0823471	0.99901
chr1:28640873-28644709	918.157	-0.150002	0.125879	-1.19164	0.233403	0.99901
chr1:28647516-28649719	153.879	0.00708409	0.141038	0.0502281	0.959941	0.99901
chr1:28667472-28670607	576.664	-0.129679	0.128872	-1.00626	0.314292	0.99901
chr1:28735702-28740964	970.637	-0.130748	0.113207	-1.15494	0.248114	0.99901
chr1:28743312-28750765	249.151	-0.210293	0.143667	-1.46376	0.143261	0.99901
chr1:28750835-28752148	29.2225	-0.0674299	0.134435	-0.501582	0.615962	0.99901
chr1:28753924-28757630	113.412	-0.110084	0.147926	-0.744184	0.456765	0.99901
chr1:28785238-28785732	29.1157	0.0265366	0.141047	0.188141	0.850766	0.99901
chr1:28811884-28812740	25.464	0.147209	0.13589	1.0833	0.278676	0.99901
chr1:28886547-28888470	318.954	0.13409	0.139604	0.960506	0.336801	0.99901
chr1:28913924-28917400	773.559	-0.038104	0.117068	-0.325485	0.744814	0.99901
chr1:28927590-28928186	20.3667	0.128873	0.124726	1.03324	0.301491	0.99901
chr1:29121768-29122870	49.0609	0.18073	0.147727	1.2234	0.221177	0.99901
chr1:29124008-29125303	105.349	0.0549023	0.147276	0.372785	0.709308	0.99901
chr1:29178031-29183015	1094.14	-0.138937	0.120816	-1.14999	0.250149	0.99901
chr1:29229704-29231720	479.62	-0.106319	0.120877	-0.879563	0.379096	0.99901
chr1:29236003-29238967	336.884	0.308837	0.132615	2.32882	0.0198686	0.99901
chr1:29259619-29260948	81.5998	0.29701	0.148423	2.0011	0.0453815	0.99901
chr1:29930968-29931555	13.673	0.102952	0.118722	0.867165	0.385852	0.99901
chr1:30717500-30719743	212.663	0.193578	0.143134	1.35243	0.176239	0.99901
chr1:30816224-30817023	16.005	-0.00337672	0.121555	-0.0277794	0.977838	0.99901
chr1:30823779-30825158	92.7133	-0.00779829	0.148618	-0.052472	0.958153	0.99901
chr1:30878845-30881403	109.049	0.0807403	0.146117	0.552574	0.580555	0.99901
chr1:30905454-30908490	353.066	0.236081	0.13896	1.69891	0.0893361	0.99901
chr1:30908819-30909717	91.4268	0.0562772	0.148912	0.377924	0.705487	0.99901
chr1:31060813-31066588	1303.25	-0.183685	0.142464	-1.28935	0.197277	0.99901
chr1:31154009-31156162	240.871	-0.0711396	0.137797	-0.516263	0.605671	0.99901
chr1:31227382-31228602	37.4324	0.0209733	0.145529	0.144118	0.885408	0.99901
chr1:31237132-31241010	547.54	0.154779	0.125237	1.23589	0.216499	0.99901
chr1:31295140-31300107	1269.95	-0.12409	0.117872	-1.05275	0.292454	0.99901
chr1:31372830-31374325	64.6982	0.160606	0.148111	1.08436	0.278203	0.99901
chr1:31394773-31395230	27.1598	0.22194	0.135372	1.63949	0.101112	0.99901
chr1:31412115-31415825	712.679	0.0725042	0.133377	0.543604	0.586714	0.99901
chr1:31549101-31550028	30.8643	-0.047586	0.142123	-0.334822	0.737759	0.99901
chr1:31617278-31618746	189.179	0.332241	0.14748	2.25278	0.0242728	0.99901
chr1:31643375-31646400	764.716	-0.0868574	0.120857	-0.718676	0.47234	0.99901
chr1:31653769-31654310	12.8314	0.041001	0.113243	0.362062	0.717306	0.99901
chr1:31758341-31765654	1050.04	0.073482	0.126736	0.579805	0.562046	0.99901
chr1:31771904-31773165	61.3874	0.169842	0.146681	1.1579	0.246905	0.99901
chr1:31782063-31782621	13.4749	0.0467459	0.115551	0.404548	0.685809	0.99901
chr1:31787476-31789642	222.464	-0.0856952	0.139843	-0.612794	0.540012	0.99901
chr1:31811536-31812172	14.4488	0.0477081	0.119471	0.399328	0.689652	0.99901
chr1:31934500-31939194	613.381	0.0604384	0.116992	0.516602	0.605434	0.99901
chr1:32012837-32019924	1646.99	-0.095539	0.118454	-0.806547	0.419928	0.99901
chr1:32071698-32074713	524.51	-0.145092	0.122725	-1.18225	0.237107	0.99901
chr1:32075004-32075670	15.4576	-0.0193709	0.11916	-0.162562	0.870863	0.99901
chr1:32107331-32110160	932.795	-0.082698	0.11709	-0.706275	0.480017	0.99901
chr1:32179001-32182870	639.377	-0.0449925	0.124729	-0.360721	0.718308	0.99901
chr1:32183923-32185217	24.0095	-0.194379	0.133406	-1.45705	0.145104	0.99901
chr1:32198620-32202426	560.207	0.0543344	0.125596	0.432611	0.665297	0.99901
chr1:32204890-32206914	336.971	0.078333	0.141847	0.552237	0.580786	0.99901
chr1:32220654-32224016	854.98	-0.0567654	0.120683	-0.470368	0.638092	0.99901
chr1:32239138-32241946	119.199	0.142986	0.147266	0.970939	0.331579	0.99901
chr1:32291367-32293356	437.048	0.0202216	0.127829	0.158193	0.874305	0.99901
chr1:32332256-32337078	1076.09	-0.0433956	0.11846	-0.36633	0.714119	0.99901
chr1:32350770-32352772	329.734	0.137722	0.137366	1.0026	0.316055	0.99901
chr1:32357193-32357845	15.2651	0.0130909	0.109025	0.120073	0.904425	0.99901
chr1:32361421-32362436	35.9778	0.0831558	0.144052	0.577263	0.563762	0.99901
chr1:32391877-32396392	1055.83	-0.114149	0.119704	-0.953592	0.34029	0.99901
chr1:32464004-32466643	553.749	-0.0810025	0.121884	-0.664587	0.506315	0.99901
chr1:32499658-32501512	212.271	0.00690583	0.135003	0.0511533	0.959203	0.99901
chr1:32538580-32541979	483.475	-0.102614	0.123851	-0.828531	0.40737	0.99901
chr1:32611924-32612734	29.8688	-0.104871	0.137293	-0.763852	0.444956	0.99901
chr1:32648383-32656384	1479.2	-0.13782	0.125032	-1.10227	0.270343	0.99901
chr1:32702167-32703483	57.377	0.263525	0.14729	1.78916	0.0735898	0.99901
chr1:32741087-32742616	90.6773	0.263825	0.147235	1.79186	0.0731548	0.99901
chr1:32753320-32756220	463.011	0.126839	0.126197	1.00509	0.314856	0.99901
chr1:32765072-32767964	422.34	0.15071	0.134092	1.12393	0.261041	0.99901
chr1:32814938-32819752	1236.58	-0.0481975	0.117334	-0.410772	0.681239	0.99901
chr1:32870023-32872490	94.9605	0.0961405	0.148163	0.648882	0.516415	0.99901
chr1:32886038-32887927	139.734	0.147008	0.14458	1.0168	0.309251	0.99901
chr1:32892256-32894336	82.9132	0.0343186	0.148415	0.231233	0.817134	0.99901
chr1:32900621-32902004	90.3857	0.233316	0.148241	1.5739	0.115511	0.99901
chr1:32947555-32948977	23.5875	-0.0677254	0.12797	-0.529229	0.596647	0.99901
chr1:32960224-32965838	1065.25	-0.00415565	0.113915	-0.0364801	0.9709	0.99901
chr1:32972319-32973569	164.166	0.0983942	0.139141	0.707154	0.479471	0.99901
chr1:33034657-33037562	561.199	-0.0942409	0.121194	-0.777607	0.436801	0.99901
chr1:33080090-33083032	480.495	0.0440089	0.125485	0.35071	0.725806	0.99901
chr1:33126086-33128159	340.636	-0.148804	0.143585	-1.03634	0.300041	0.99901
chr1:33180166-33183090	540.046	0.106241	0.125375	0.847384	0.396781	0.99901
chr1:33190768-33191373	14.0987	-0.00367993	0.117094	-0.0314272	0.974929	0.99901
chr1:33255455-33259421	655.863	-0.124437	0.119883	-1.03798	0.299278	0.99901
chr1:33337475-33339526	39.538	-0.0117761	0.146258	-0.080516	0.935827	0.99901
chr1:33341620-33343109	34.6026	-0.127091	0.140412	-0.905134	0.365394	0.99901
chr1:33344058-33351208	1066.79	-0.112811	0.126492	-0.89184	0.372479	0.99901
chr1:33362135-33365086	130.453	-0.0391866	0.145441	-0.269432	0.787597	0.99901
chr1:33386572-33394887	880.072	-0.0448597	0.134714	-0.332998	0.739136	0.99901
chr1:33409670-33411159	54.0563	-0.0808084	0.145666	-0.55475	0.579065	0.99901
chr1:33426361-33431934	861.69	-0.037841	0.126331	-0.29954	0.764528	0.99901
chr1:33471866-33474062	313.479	-0.0817007	0.132094	-0.618505	0.536243	0.99901
chr1:34162387-34167482	767.999	0.0543321	0.129668	0.419009	0.67521	0.99901
chr1:34265996-34266967	31.3451	-0.102868	0.143168	-0.718516	0.472439	0.99901
chr1:34683713-34684969	28.1007	0.0296544	0.137548	0.215594	0.829305	0.99901
chr1:34781195-34781912	24.647	0.117981	0.130617	0.903257	0.366389	0.99901
chr1:34857609-34860316	680.892	-0.0611339	0.121471	-0.503282	0.614766	0.99901
chr1:34865873-34866773	61.6398	-0.0162126	0.148291	-0.10933	0.912941	0.99901
chr1:34885410-34886205	17.1871	-0.0822464	0.125807	-0.653752	0.513272	0.99901
chr1:34924704-34925936	20.8721	-0.0625561	0.131316	-0.47638	0.633804	0.99901
chr1:34927712-34930930	523.92	0.197241	0.131136	1.50409	0.132559	0.99901
chr1:34983987-34985821	133.709	-0.0358878	0.145632	-0.246428	0.805351	0.99901
chr1:35029508-35032951	708.443	-0.1422	0.130476	-1.08986	0.275776	0.99901
chr1:35078651-35080870	504.54	-0.042194	0.125331	-0.336662	0.736372	0.99901
chr1:35179677-35181147	28.7934	-0.0286839	0.137268	-0.208963	0.834477	0.99901
chr1:35184421-35194215	2160.69	-0.187402	0.129254	-1.44987	0.147094	0.99901
chr1:35202331-35203537	28.6019	-0.113436	0.125474	-0.904062	0.365963	0.99901
chr1:35267461-35272156	641.279	-0.0444193	0.127372	-0.348737	0.727287	0.99901
chr1:35452942-35453793	17.7283	0.0488943	0.12331	0.396514	0.691726	0.99901
chr1:35554772-35560072	1136.96	-0.0362795	0.125568	-0.288922	0.772641	0.99901
chr1:35572640-35573828	85.5596	0.0447026	0.148917	0.300185	0.764036	0.99901
chr1:35637256-35638311	15.6019	-0.138349	0.116788	-1.18462	0.236169	0.99901
chr1:35638474-35643088	1003.43	-0.155045	0.116678	-1.32883	0.183904	0.99901
chr1:35707450-35709109	110.892	0.26987	0.147589	1.82852	0.0674714	0.99901
chr1:35714703-35719695	470.771	0.181887	0.133591	1.36152	0.17335	0.99901
chr1:35768209-35770441	572.164	-0.0766598	0.124462	-0.615929	0.537941	0.99901
chr1:35807316-35810710	678.446	0.0557001	0.11956	0.465877	0.641303	0.99901
chr1:35882576-35887701	791.825	-0.084894	0.121623	-0.698011	0.48517	0.99901
chr1:35929866-35934136	1163.02	-0.0665266	0.110925	-0.599745	0.548676	0.99901
chr1:36083415-36085385	187.162	0.100224	0.14066	0.712528	0.476138	0.99901
chr1:36088312-36090947	620.817	0.0113561	0.128139	0.0886228	0.929382	0.99901
chr1:36147797-36150142	446.459	0.0379707	0.130471	0.291029	0.771029	0.99901
chr1:36154616-36161842	1234.75	0.0423256	0.126057	0.335766	0.737047	0.99901
chr1:36223104-36227064	999.381	-0.162286	0.12245	-1.32532	0.185065	0.99901
chr1:36306183-36308296	313.776	0.154454	0.142411	1.08456	0.278116	0.99901
chr1:36321270-36321801	13.8761	0.0270284	0.119263	0.226629	0.820712	0.99901
chr1:36322586-36324221	48.3636	0.0981939	0.146496	0.670281	0.502679	0.99901
chr1:36383375-36388182	835.207	0.0471015	0.120815	0.389866	0.696636	0.99901
chr1:36396012-36398600	511.868	-0.0275913	0.129996	-0.212248	0.831913	0.99901
chr1:36400755-36401882	31.9548	0.0498419	0.138999	0.358577	0.719911	0.99901
chr1:36448527-36451627	513.227	-0.00373715	0.12322	-0.0303292	0.975805	0.99901
chr1:36462735-36465176	635.01	-0.105663	0.125009	-0.84524	0.397977	0.99901
chr1:36976974-36978877	33.8493	0.0487232	0.13932	0.349721	0.726548	0.99901
chr1:36988102-36988639	12.8518	-0.0666156	0.117103	-0.568865	0.569448	0.99901
chr1:37028470-37036717	903.058	-0.12486	0.123929	-1.00751	0.31369	0.99901
chr1:37473591-37476003	262.924	0.0825969	0.142297	0.580456	0.561607	0.99901
chr1:37511608-37515793	700.051	-0.0115516	0.120672	-0.0957271	0.923737	0.99901
chr1:37552041-37554735	715.184	-0.0950995	0.12004	-0.792232	0.428225	0.99901
chr1:37556014-37558170	286.327	0.0947826	0.129947	0.729395	0.46576	0.99901
chr1:37593793-37596949	732.231	-0.135886	0.11805	-1.15109	0.249695	0.99901
chr1:37634082-37635295	52.8005	-0.0613144	0.146341	-0.418984	0.675228	0.99901
chr1:37688603-37694260	1104.84	-0.0114783	0.129662	-0.0885251	0.929459	0.99901
chr1:37726033-37727162	31.0591	0.014013	0.135814	0.103177	0.917822	0.99901
chr1:37751970-37754052	81.3714	0.172213	0.148772	1.15756	0.247042	0.99901
chr1:37762606-37767996	774.13	-0.0640672	0.127007	-0.50444	0.613952	0.99901
chr1:37792841-37796605	572.498	0.0657441	0.134226	0.489802	0.624274	0.99901
chr1:37806157-37809947	891.379	-0.0695807	0.120072	-0.579491	0.562258	0.99901
chr1:37853816-37857168	68.1545	-0.15032	0.148404	-1.01291	0.311103	0.99901
chr1:37857272-37860680	915.335	-0.0625228	0.119279	-0.524171	0.60016	0.99901
chr1:37930448-37933024	451.977	-0.0945466	0.122818	-0.769811	0.441412	0.99901
chr1:37945735-37947580	204.138	-0.032257	0.140481	-0.229619	0.818388	0.99901
chr1:37988240-37990672	769.725	-0.135086	0.1241	-1.08853	0.276362	0.99901
chr1:37995814-37996535	32.8956	0.0370028	0.13935	0.265538	0.790595	0.99901
chr1:38004396-38005542	67.6332	0.246314	0.148917	1.65404	0.0981202	0.99901
chr1:38011552-38014419	516.983	0.0298966	0.125016	0.239143	0.810995	0.99901
chr1:38041626-38049652	678.425	0.310679	0.118046	2.63184	0.00849228	0.99901
chr1:38370632-38371567	18.1309	-0.0745022	0.123596	-0.60279	0.546648	0.99901
chr1:38474578-38477281	70.9705	0.154721	0.148631	1.04097	0.297887	0.99901
chr1:38578098-38579083	80.4675	0.115392	0.148569	0.776689	0.437342	0.99901
chr1:38727372-38728885	40.246	-0.067244	0.142661	-0.471355	0.637387	0.99901
chr1:38783237-38784182	17.2889	-0.00380694	0.124855	-0.0304908	0.975676	0.99901
chr1:38803662-38804531	64.1448	-0.0368354	0.148897	-0.247388	0.804608	0.99901
chr1:38817798-38819045	99.1296	-0.0705479	0.148759	-0.474244	0.635326	0.99901
chr1:38856368-38864602	1341.53	-0.146996	0.115165	-1.27639	0.201816	0.99901
chr1:38871901-38874624	580.111	-0.132997	0.125058	-1.06348	0.287565	0.99901
chr1:38990113-38994415	773.24	-0.0919939	0.126301	-0.72837	0.466387	0.99901
chr1:39025517-39028083	736.34	-0.0389662	0.124226	-0.313672	0.75377	0.99901
chr1:39080521-39084952	667.799	0.0541905	0.123964	0.437148	0.662004	0.99901
chr1:39098275-39098725	18.329	0.118418	0.122314	0.968144	0.332973	0.99901
chr1:39102499-39108605	481.668	-0.105882	0.120784	-0.876619	0.380694	0.99901
chr1:39267386-39273948	363.408	-0.186399	0.134128	-1.38971	0.164617	0.99901
chr1:39407514-39413189	981.056	-0.054034	0.113767	-0.474955	0.634819	0.99901
chr1:39413766-39417643	144.168	-0.105521	0.147142	-0.717133	0.473292	0.99901
chr1:39491033-39492722	90.0179	0.307988	0.148772	2.0702	0.0384336	0.99901
chr1:39514658-39515213	25.0092	0.14638	0.131609	1.11224	0.266035	0.99901
chr1:39558217-39560183	262.962	-0.0912843	0.135961	-0.6714	0.501966	0.99901
chr1:39572772-39577432	975.59	-0.0919104	0.119511	-0.769052	0.441863	0.99901
chr1:39670904-39672704	122.557	0.0292742	0.148257	0.197455	0.843471	0.99901
chr1:39687538-39693324	651.886	0.109706	0.12716	0.862739	0.388281	0.99901
chr1:39738169-39742244	510.936	-0.0433335	0.12098	-0.358186	0.720204	0.99901
chr1:39788624-39789763	72.284	0.178271	0.148591	1.19974	0.23024	0.99901
chr1:39877640-39884206	1057.62	-0.197125	0.127277	-1.54879	0.121432	0.99901
chr1:39886125-39887866	53.7515	0.00280917	0.146539	0.0191702	0.984705	0.99901
chr1:39897405-39903370	1001.93	-0.0232775	0.121072	-0.192262	0.847537	0.99901
chr1:39954618-39956982	464.704	0.06321	0.127827	0.494498	0.620954	0.99901
chr1:40039059-40043001	1116.36	-0.0245689	0.12024	-0.204332	0.838094	0.99901
chr1:40095834-40098116	574.957	-0.0166998	0.125796	-0.132752	0.894389	0.99901
chr1:40160654-40166005	1294.06	-0.166682	0.132799	-1.25514	0.209427	0.99901
chr1:40255752-40260053	1248.56	-0.187983	0.126251	-1.48895	0.136499	0.99901
chr1:40314803-40317284	79.0056	0.103692	0.148782	0.696945	0.485837	0.99901
chr1:40373230-40377471	1080.89	-0.0859943	0.115131	-0.746926	0.455108	0.99901
chr1:40448752-40455454	1151.7	-0.0626263	0.119848	-0.522547	0.60129	0.99901
chr1:40476550-40479417	579.182	0.0672943	0.123697	0.544027	0.586423	0.99901
chr1:40507449-40510689	573.066	0.00815568	0.121826	0.0669452	0.946625	0.99901
chr1:40530476-40533268	749.133	-0.178309	0.135308	-1.3178	0.187571	0.99901
chr1:40663555-40667072	449.807	0.157445	0.126776	1.24191	0.214269	0.99901
chr1:40668700-40669178	23.2232	0.111729	0.133351	0.837854	0.402113	0.99901
chr1:40689873-40693939	897.117	-0.0541674	0.116468	-0.465084	0.641872	0.99901
chr1:40708181-40713422	931.561	-0.145081	0.146272	-0.991858	0.321267	0.99901
chr1:40782620-40784636	78.4371	0.341787	0.148626	2.29964	0.0214684	0.99901
chr1:40801983-40802738	34.9412	0.167229	0.142588	1.17281	0.240871	0.99901
chr1:40818212-40819054	40.7499	0.0852567	0.143252	0.595152	0.551742	0.99901
chr1:40861012-40862929	230.331	0.255485	0.14468	1.76586	0.0774196	0.99901
chr1:40978621-40981963	741.415	0.0465445	0.127806	0.364179	0.715724	0.99901
chr1:41239036-41243737	632.602	0.0996705	0.124448	0.8009	0.42319	0.99901
chr1:41285839-41286988	23.0733	0.0513193	0.135796	0.377915	0.705493	0.99901
chr1:41314482-41315865	35.0612	0.0221212	0.142407	0.155338	0.876555	0.99901
chr1:41360392-41367773	859.213	0.118003	0.12911	0.913971	0.360732	0.99901
chr1:41380807-41381824	27.0751	0.0379161	0.136355	0.27807	0.780959	0.99901
chr1:41394304-41395378	30.0596	-0.0884007	0.141399	-0.625186	0.531849	0.99901
chr1:41404114-41405119	26.6622	-0.00533411	0.137344	-0.0388376	0.96902	0.99901
chr1:41496043-41496691	32.9836	-0.030586	0.141669	-0.215898	0.829067	0.99901
chr1:41661012-41663150	200.264	0.131125	0.139742	0.938338	0.348071	0.99901
chr1:41714303-41714849	13.2499	-0.0254782	0.110566	-0.230434	0.817755	0.99901
chr1:41862432-41863485	25.7014	0.0329461	0.139329	0.236462	0.813074	0.99901
chr1:41915160-41920407	1002	-0.0444012	0.116228	-0.382019	0.702447	0.99901
chr1:42034120-42036741	550.421	0.0205007	0.125188	0.163759	0.869921	0.99901
chr1:42331930-42337179	1220.32	-0.0851827	0.113169	-0.752701	0.45163	0.99901
chr1:42348293-42349380	23.4385	-0.0503238	0.135633	-0.371029	0.710616	0.99901
chr1:42379533-42383414	679.959	0.0677901	0.118849	0.570386	0.568416	0.99901
chr1:42383754-42384398	15.8695	-0.00651422	0.118443	-0.0549987	0.95614	0.99901
chr1:42420157-42423678	79.3151	0.165958	0.148816	1.11519	0.264767	0.99901
chr1:42455614-42458750	441.281	0.107676	0.130643	0.824202	0.409825	0.99901
chr1:42461850-42466053	630.475	-0.101652	0.127331	-0.798327	0.424681	0.99901
chr1:42657282-42660257	743.75	-0.0841075	0.11842	-0.710247	0.477551	0.99901
chr1:42679945-42687547	1616.83	-0.131257	0.127037	-1.03322	0.301502	0.99901
chr1:42688081-42689322	20.9515	-0.0371983	0.128555	-0.289357	0.772308	0.99901
chr1:42764111-42771261	1785.76	-0.0503044	0.11275	-0.446159	0.655482	0.99901
chr1:42811522-42818258	776.045	-0.113561	0.130258	-0.871815	0.383309	0.99901
chr1:42845714-42848080	588.273	-0.0417741	0.120644	-0.346259	0.729148	0.99901
chr1:42923190-42925585	360.349	0.0790236	0.126094	0.626703	0.530854	0.99901
chr1:42950435-42951581	13.1747	-0.257522	0.114373	-2.25159	0.0243482	0.99901
chr1:42952332-42960289	921.693	-0.0565285	0.120267	-0.470027	0.638336	0.99901
chr1:43147104-43148613	136.12	0.117112	0.147329	0.794904	0.426669	0.99901
chr1:43170930-43173138	647.181	-0.15595	0.121262	-1.28606	0.198423	0.99901
chr1:43270491-43271157	16.2484	0.0916533	0.125046	0.732954	0.463586	0.99901
chr1:43348197-43349705	114.545	0.197311	0.146014	1.35131	0.176595	0.99901
chr1:43357644-43361277	456.888	-0.0861285	0.129065	-0.667328	0.504563	0.99901
chr1:43367084-43369239	124.423	0.0049916	0.146468	0.0340798	0.972814	0.99901
chr1:43388244-43391535	947.553	-0.0578099	0.11548	-0.500607	0.616648	0.99901
chr1:43452722-43455023	229.23	-0.0208151	0.133697	-0.155689	0.876278	0.99901
chr1:43529527-43534107	448.876	0.169361	0.124658	1.35861	0.174271	0.99901
chr1:43558136-43559374	37.7597	0.181199	0.135981	1.33253	0.182687	0.99901
chr1:43565378-43566424	28.0273	-0.0122705	0.134517	-0.0912191	0.927319	0.99901
chr1:43648986-43654206	1248.89	-0.206868	0.119693	-1.72832	0.0839314	0.99901
chr1:43706404-43709139	587.663	0.0703312	0.123362	0.57012	0.568596	0.99901
chr1:43935933-43936953	63.2584	0.29389	0.148569	1.97814	0.0479132	0.99901
chr1:43944294-43949192	815.923	0.0058183	0.125084	0.046515	0.9629	0.99901
chr1:43952023-43954234	114.166	-0.0815139	0.145415	-0.560562	0.575096	0.99901
chr1:43969449-43971239	388.304	0.0324239	0.13426	0.241501	0.809167	0.99901
chr1:43974006-43977725	759.301	0.00878103	0.134351	0.0653591	0.947888	0.99901
chr1:43978010-43981606	504.785	0.179537	0.134115	1.33869	0.180673	0.99901
chr1:43991099-43993384	306.729	0.108362	0.139185	0.778546	0.436247	0.99901
chr1:44028971-44031996	710.221	0.105351	0.130176	0.809295	0.418346	0.99901
chr1:44212411-44215108	598.45	-0.0552049	0.124724	-0.442618	0.658042	0.99901
chr1:44352778-44355928	434.974	-0.0583687	0.122113	-0.477989	0.632658	0.99901
chr1:44404669-44408035	207.52	0.057101	0.14375	0.397224	0.691203	0.99901
chr1:44408736-44409380	22.426	0.0711977	0.135074	0.527102	0.598123	0.99901
chr1:44417331-44418257	26.2496	0.0108583	0.134607	0.0806669	0.935707	0.99901
chr1:44501434-44501893	14.1308	0.145276	0.11574	1.25519	0.209412	0.99901
chr1:44524252-44525353	42.9259	-0.0264295	0.143245	-0.184506	0.853616	0.99901
chr1:44616955-44617758	34.7197	-0.0326848	0.139184	-0.234831	0.81434	0.99901
chr1:44631303-44633353	262.08	0.0382175	0.133398	0.286492	0.774502	0.99901
chr1:44672906-44675801	499.041	0.0693843	0.126814	0.547132	0.584288	0.99901
chr1:44730868-44731449	18.0353	0.0264295	0.125361	0.210828	0.833021	0.99901
chr1:44739045-44741671	421.34	-0.27341	0.124848	-2.18995	0.0285277	0.99901
chr1:44774492-44777719	910.015	-0.0720759	0.118593	-0.607759	0.543347	0.99901
chr1:44783955-44784846	25.1586	0.296777	0.134547	2.20575	0.0274017	0.99901
chr1:44786010-44786640	18.8928	0.00554758	0.126824	0.0437423	0.96511	0.99901
chr1:44799437-44803296	610.939	0.0434837	0.125717	0.345886	0.729428	0.99901
chr1:44808442-44809155	15.8606	0.0390058	0.122286	0.318972	0.749748	0.99901
chr1:44812988-44814614	109.356	0.128491	0.147054	0.873769	0.382244	0.99901
chr1:44841665-44843873	279.228	0.236386	0.138956	1.70115	0.0889141	0.99901
chr1:44985016-44987378	581.959	-0.119767	0.119596	-1.00143	0.316619	0.99901
chr1:45009631-45013423	1056.03	-0.0426101	0.125617	-0.339205	0.734455	0.99901
chr1:45202029-45207961	1257.39	-0.11929	0.134563	-0.886501	0.375348	0.99901
chr1:45302777-45305101	416.012	0.0487174	0.129272	0.37686	0.706278	0.99901
chr1:45326235-45327360	44.9067	0.0976514	0.14058	0.694632	0.487286	0.99901
chr1:45338443-45341823	861.211	-0.117351	0.117886	-0.995461	0.319512	0.99901
chr1:45489778-45492304	431.221	-0.026476	0.125157	-0.211543	0.832464	0.99901
chr1:45499084-45501503	383.08	0.0155105	0.129653	0.119631	0.904775	0.99901
chr1:45518815-45522824	741.26	-0.042081	0.125085	-0.336419	0.736555	0.99901
chr1:45550018-45553058	736.09	-0.158057	0.119218	-1.32578	0.184914	0.99901
chr1:45582893-45587523	1349.77	-0.0742223	0.113578	-0.653494	0.513438	0.99901
chr1:45683954-45689618	1695.49	-0.132063	0.121225	-1.0894	0.275976	0.99901
chr1:45749302-45751602	381.439	-0.0201039	0.128235	-0.156774	0.875423	0.99901
chr1:45802815-45806909	793.94	-0.0688661	0.124228	-0.554354	0.579337	0.99901
chr1:45863380-45865871	63.6467	0.0192797	0.147325	0.130865	0.895882	0.99901
chr1:45927053-45927743	14.7816	-0.013469	0.121236	-0.111097	0.911539	0.99901
chr1:46124554-46134624	2661.86	-0.211559	0.140997	-1.50045	0.133497	0.99901
chr1:46172979-46174513	33.2824	0.0547669	0.143295	0.382198	0.702315	0.99901
chr1:46197253-46199240	328.569	0.140864	0.1331	1.05833	0.289904	0.99901
chr1:46202574-46204623	271.487	0.105132	0.138234	0.76054	0.446932	0.99901
chr1:46218035-46220777	54.1964	-0.157713	0.146434	-1.07702	0.281472	0.99901
chr1:46246533-46249154	362.313	-0.0517953	0.12763	-0.405824	0.684872	0.99901
chr1:46300522-46306190	1668.74	-0.0542488	0.11946	-0.454119	0.649743	0.99901
chr1:46339067-46342303	599.853	-0.0530923	0.124406	-0.426767	0.669549	0.99901
chr1:46392445-46396460	624.242	-0.227045	0.129578	-1.75219	0.0797405	0.99901
chr1:46398752-46400604	47.5251	0.0288972	0.147638	0.195731	0.844821	0.99901
chr1:46448036-46448998	42.5661	0.114822	0.144572	0.794217	0.427069	0.99901
chr1:46466082-46467592	137.186	0.154997	0.144877	1.06985	0.284685	0.99901
chr1:46489154-46490350	30.1555	0.0525716	0.138618	0.379256	0.704498	0.99901
chr1:46532824-46533837	37.8266	0.0807008	0.138433	0.582958	0.559922	0.99901
chr1:46543837-46544588	31.2722	0.287034	0.141791	2.02435	0.0429338	0.99901
chr1:46549151-46551138	51.9963	0.0820971	0.145594	0.563879	0.572837	0.99901
chr1:46603220-46604943	348.839	0.0357504	0.129007	0.27712	0.781688	0.99901
chr1:46615979-46617262	121.47	0.372709	0.146855	2.53794	0.0111509	0.99901
chr1:46666298-46668986	623.283	0.00531928	0.122594	0.0433895	0.965391	0.99901
chr1:46716386-46720006	871.185	-0.10899	0.122692	-0.888319	0.374369	0.99901
chr1:47022944-47025478	303.397	-0.110288	0.128301	-0.859601	0.390009	0.99901
chr1:47178843-47179710	33.6854	0.0182909	0.143191	0.127738	0.898356	0.99901
chr1:47225019-47226003	41.0826	0.208034	0.139699	1.48916	0.136444	0.99901
chr1:47231633-47232516	32.18	0.0130921	0.14115	0.0927528	0.9261	0.99901
chr1:47312345-47315249	555.674	-0.272775	0.126212	-2.16125	0.0306762	0.99901
chr1:47331485-47336716	946.359	-0.11733	0.120404	-0.974469	0.329823	0.99901
chr1:47416118-47417264	50.2183	0.213876	0.141332	1.51329	0.130206	0.99901
chr1:47432486-47433006	21.2577	0.0615498	0.134579	0.457352	0.647418	0.99901
chr1:47433731-47434789	29.2	-0.0743195	0.137267	-0.541422	0.588217	0.99901
chr1:47444618-47445409	26.6026	-0.0831073	0.134574	-0.617558	0.536866	0.99901
chr1:47507751-47509083	110.034	-0.175546	0.148043	-1.18578	0.23571	0.99901
chr1:47532886-47534354	85.8672	-0.183801	0.147669	-1.24468	0.213248	0.99901
chr1:47592945-47593640	26.1177	0.0948621	0.137094	0.691951	0.488968	0.99901
chr1:47708701-47710801	134.841	0.0828847	0.146803	0.564599	0.572346	0.99901
chr1:47725012-47725586	12.7957	0.0178523	0.113235	0.157658	0.874727	0.99901
chr1:47725894-47726505	25.712	0.0434917	0.136454	0.318727	0.749933	0.99901
chr1:47983823-47984656	25.2021	-0.0700846	0.136045	-0.515158	0.606443	0.99901
chr1:47996305-47998249	137.212	0.083856	0.144799	0.57912	0.562508	0.99901
chr1:48470394-48473582	414.822	0.0168297	0.126534	0.133006	0.894189	0.99901
chr1:48626858-48628261	26.8544	-0.096255	0.136859	-0.703315	0.481859	0.99901
chr1:48746557-48747623	26.888	0.00339928	0.132274	0.0256987	0.979498	0.99901
chr1:48770380-48779529	1165.42	-0.0966141	0.122934	-0.7859	0.431926	0.99901
chr1:50023215-50024389	81.14	0.188474	0.144957	1.30021	0.19353	0.99901
chr1:50047604-50048609	23.624	-0.193831	0.135226	-1.43338	0.15175	0.99901
chr1:50105255-50117924	1656.71	-0.0832578	0.136382	-0.610477	0.541546	0.99901
chr1:50131931-50132696	15.4603	-0.00916022	0.12085	-0.0757982	0.93958	0.99901
chr1:50139098-50140931	48.5105	0.0102206	0.145621	0.0701863	0.944045	0.99901
chr1:50332702-50334114	153.656	0.151758	0.142221	1.06706	0.285944	0.99901
chr1:50418587-50419556	18.3826	0.0477864	0.122483	0.390149	0.696427	0.99901
chr1:50420303-50424634	161.681	-0.061213	0.147377	-0.415349	0.677886	0.99901
chr1:50427315-50427978	14.9498	0.027594	0.122201	0.225808	0.821351	0.99901
chr1:50632673-50634147	33.4285	0.0231017	0.141566	0.163187	0.870371	0.99901
chr1:50957866-50961260	701.798	-0.0856887	0.121907	-0.702902	0.482117	0.99901
chr1:50967686-50972314	1036.26	-0.223447	0.114311	-1.95473	0.0506153	0.99901
chr1:50977154-50978766	123.283	0.0245532	0.148505	0.165336	0.86868	0.99901
chr1:51234906-51241923	1370.36	-0.136196	0.123221	-1.1053	0.269031	0.99901
chr1:51329992-51331073	52.7084	0.199875	0.147353	1.35644	0.17496	0.99901
chr1:51418260-51424070	840.618	-0.0589345	0.127681	-0.461576	0.644385	0.99901
chr1:51517351-51519895	240.137	0.139098	0.136209	1.02121	0.307156	0.99901
chr1:51616239-51620776	679.376	-0.0458975	0.123951	-0.370287	0.711168	0.99901
chr1:51669121-51672483	161.078	-0.0550409	0.147737	-0.372561	0.709475	0.99901
chr1:51728163-51731180	556.728	0.130461	0.126131	1.03433	0.300982	0.99901
chr1:51874315-51880359	1216.53	-0.12754	0.119416	-1.06804	0.285505	0.99901
chr1:51989074-51991309	239.59	0.184966	0.133886	1.38152	0.16712	0.99901
chr1:52031261-52034524	576.521	-0.047258	0.126769	-0.372787	0.709307	0.99901
chr1:52052639-52060559	2299.55	-0.165878	0.12757	-1.30029	0.193501	0.99901
chr1:52140446-52145834	826.443	0.0044767	0.118096	0.0379071	0.969762	0.99901
chr1:52364485-52366947	676.439	0.022137	0.129724	0.170646	0.864502	0.99901
chr1:52368030-52369247	100.099	0.0801523	0.147165	0.54464	0.586001	0.99901
chr1:52402662-52406753	1142	-0.161114	0.123803	-1.30137	0.193132	0.99901
chr1:52549571-52555606	1442.03	-0.0845435	0.125287	-0.674798	0.499804	0.99901
chr1:52601847-52603531	92.2043	0.155933	0.148377	1.05092	0.293294	0.99901
chr1:52632669-52633861	77.8875	0.231542	0.148861	1.55543	0.119845	0.99901
chr1:52662349-52663625	48.4254	-0.0541559	0.147721	-0.36661	0.71391	0.99901
chr1:52696697-52699313	433.974	0.0826397	0.121662	0.679256	0.496976	0.99901
chr1:52702728-52703883	47.312	0.127777	0.147264	0.867675	0.385572	0.99901
chr1:52725830-52729580	783.154	-0.0565791	0.122873	-0.46047	0.645179	0.99901
chr1:52841973-52843788	212.488	0.0712333	0.138216	0.515377	0.606289	0.99901
chr1:52926552-52928845	388.607	0.115237	0.136483	0.844332	0.398484	0.99901
chr1:53014319-53017208	590.544	-0.168269	0.146469	-1.14883	0.250625	0.99901
chr1:53061491-53063387	143.422	0.312267	0.14643	2.13253	0.0329633	0.99901
chr1:53195985-53197967	498.348	-0.0178689	0.126843	-0.140874	0.887969	0.99901
chr1:53218911-53221564	628.23	-0.107372	0.123407	-0.870058	0.384268	0.99901
chr1:53236419-53239463	849.352	-0.168146	0.12264	-1.37106	0.170357	0.99901
chr1:53288282-53289057	20.7002	0.0990019	0.131703	0.751705	0.452229	0.99901
chr1:53296230-53296902	16.2342	0.106539	0.12197	0.873487	0.382398	0.99901
chr1:53303632-53304365	17.5734	0.00273767	0.128595	0.0212891	0.983015	0.99901
chr1:53324928-53329047	1004.69	-0.0137605	0.135084	-0.101866	0.918863	0.99901
chr1:53417386-53418013	13.1323	-0.0378504	0.117202	-0.322949	0.746734	0.99901
chr1:53737766-53740079	287.553	0.135871	0.135875	0.999967	0.317326	0.99901
chr1:53835880-53839258	640.905	-0.135611	0.117963	-1.1496	0.250308	0.99901
chr1:53888704-53890839	454.235	-0.0320273	0.122681	-0.261062	0.794045	0.99901
chr1:53943646-53949497	898.085	0.0462371	0.11332	0.408021	0.683258	0.99901
chr1:53982426-53982854	13.3663	0.0149151	0.117835	0.126576	0.899276	0.99901
chr1:54048734-54055237	1257.31	-0.0932522	0.118863	-0.784537	0.432725	0.99901
chr1:54121495-54122215	13.6585	0.0939496	0.112768	0.833121	0.404776	0.99901
chr1:54198944-54202120	830.71	-0.0704032	0.1187	-0.593119	0.553102	0.99901
chr1:54272921-54274308	27.5128	-0.0494887	0.13629	-0.363112	0.716521	0.99901
chr1:54309700-54310406	20.4915	-0.145936	0.132397	-1.10226	0.270347	0.99901
chr1:54325505-54326639	20.9909	-0.0453682	0.133518	-0.339791	0.734014	0.99901
chr1:54327774-54328620	18.2522	0.125668	0.121256	1.03638	0.300024	0.99901
chr1:54355581-54357482	49.3177	0.132924	0.147213	0.902942	0.366557	0.99901
chr1:54378549-54379481	21.8889	0.0455902	0.134015	0.340187	0.733716	0.99901
chr1:54400412-54408356	1389.23	-0.0268922	0.112066	-0.239968	0.810355	0.99901
chr1:54474562-54475281	12.5797	-0.0117425	0.115934	-0.101286	0.919324	0.99901
chr1:54475595-54476064	14.9214	0.0176972	0.115785	0.152845	0.87852	0.99901
chr1:54487448-54491272	348.698	0.0719855	0.131624	0.546902	0.584446	0.99901
chr1:54498918-54500207	69.1716	-0.00327908	0.148849	-0.0220295	0.982424	0.99901
chr1:54541818-54542683	48.5533	0.167679	0.14579	1.15014	0.250084	0.99901
chr1:54681180-54682112	27.4692	-0.0708644	0.137739	-0.514482	0.606915	0.99901
chr1:54715290-54717350	516.795	-0.107255	0.12678	-0.845987	0.39756	0.99901
chr1:54763162-54765537	471.007	-0.0861452	0.123838	-0.695629	0.486661	0.99901
chr1:54879685-54888406	1370.06	-0.180626	0.114919	-1.57177	0.116004	0.99901
chr1:54980266-54980970	17.4417	0.0742967	0.118598	0.626457	0.531015	0.99901
chr1:55039210-55040552	71.1263	0.0749752	0.148082	0.506309	0.61264	0.99901
chr1:55171375-55172134	14.9353	-0.0198115	0.118636	-0.166994	0.867375	0.99901
chr1:55209779-55216575	1266.44	0.0474888	0.109972	0.431824	0.665869	0.99901
chr1:56477164-56478137	58.6569	-0.0358794	0.148903	-0.240958	0.809587	0.99901
chr1:56574733-56580299	818.355	-0.0545077	0.115243	-0.47298	0.636228	0.99901
chr1:56644091-56647703	677.336	0.0331507	0.117595	0.281906	0.778015	0.99901
chr1:57421011-57425273	742.417	0.0611446	0.123724	0.494202	0.621163	0.99901
chr1:58247905-58250877	532.816	0.122708	0.130455	0.940621	0.346899	0.99901
chr1:58544620-58547805	542.786	-0.0371729	0.129239	-0.28763	0.77363	0.99901
chr1:58698292-58700682	616.989	-0.0883177	0.126256	-0.699512	0.484232	0.99901
chr1:58779551-58785855	1648.85	-0.0215618	0.118918	-0.181317	0.856119	0.99901
chr1:58815746-58817019	139.488	-0.0346237	0.141839	-0.244106	0.807149	0.99901
chr1:58903433-58904377	62.8691	0.0908405	0.148779	0.610574	0.541482	0.99901
chr1:59295427-59298042	385.505	0.00538862	0.12549	0.0429407	0.965749	0.99901
chr1:59660059-59661023	21.4383	-0.0162193	0.126513	-0.128203	0.897988	0.99901
chr1:59664071-59664671	15.0281	0.12389	0.123656	1.00189	0.316394	0.99901
chr1:59813622-59817554	529.634	0.0439479	0.122035	0.360126	0.718753	0.99901
chr1:59903056-59903938	20.2623	-0.116028	0.132942	-0.872771	0.382788	0.99901
chr1:59926303-59927414	110.803	0.0634761	0.145217	0.437112	0.66203	0.99901
chr1:59971332-59971861	13.7476	0.00775733	0.118003	0.0657385	0.947586	0.99901
chr1:60621324-60622540	24.2068	-0.0551027	0.133794	-0.411847	0.680452	0.99901
chr1:60865903-60868638	99.9128	-0.128284	0.148858	-0.861786	0.388805	0.99901
chr1:60969920-60970762	17.6899	-0.041859	0.122858	-0.34071	0.733322	0.99901
chr1:61042703-61043474	20.7359	0.125611	0.128489	0.9776	0.328272	0.99901
chr1:61049538-61051896	396.527	0.126626	0.131399	0.963674	0.33521	0.99901
chr1:61056493-61058214	373.711	-0.0890164	0.131993	-0.674402	0.500056	0.99901
chr1:61076318-61086670	1107.66	-0.182396	0.12811	-1.42375	0.15452	0.99901
chr1:61120230-61120947	14.4529	-0.0106562	0.112455	-0.0947602	0.924505	0.99901
chr1:61221419-61222169	24.4334	0.0199329	0.127655	0.156147	0.875917	0.99901
chr1:61723426-61726184	769.305	-0.119637	0.129775	-0.921881	0.35659	0.99901
chr1:61741070-61743748	314.329	0.238365	0.12757	1.86851	0.0616911	0.99901
chr1:61951693-61953459	44.0389	-0.13046	0.144754	-0.901251	0.367455	0.99901
chr1:62128599-62129468	14.4577	-0.0847376	0.115504	-0.733636	0.463171	0.99901
chr1:62318226-62319808	163.938	0.210249	0.14562	1.44382	0.14879	0.99901
chr1:62435194-62440726	1320	-0.0566318	0.117255	-0.482982	0.629109	0.99901
chr1:62684314-62686156	82.5657	-0.131183	0.148184	-0.885272	0.37601	0.99901
chr1:62686476-62691574	1098.96	-0.107201	0.122379	-0.87598	0.381041	0.99901
chr1:62783377-62786500	773.029	-0.173254	0.134475	-1.28838	0.197614	0.99901
chr1:62882042-62882947	19.5531	-0.00512341	0.123658	-0.0414319	0.966952	0.99901
chr1:63317043-63318329	71.311	-0.0266955	0.14886	-0.179334	0.857676	0.99901
chr1:63322126-63324683	130.129	0.0577172	0.148852	0.387749	0.698202	0.99901
chr1:63366800-63369321	597.887	0.0199936	0.127752	0.156503	0.875636	0.99901
chr1:63521707-63525704	1296.12	-0.152918	0.138398	-1.10492	0.269196	0.99901
chr1:63591334-63595129	563.6	0.113052	0.130253	0.867945	0.385425	0.99901
chr1:63773480-63776052	525.655	0.0964385	0.129042	0.74734	0.454858	0.99901
chr1:64245063-64245814	17.4194	0.0149414	0.125252	0.119291	0.905045	0.99901
chr1:64469259-64474290	1214.2	0.0509591	0.123725	0.411874	0.680431	0.99901
chr1:64505008-64506615	49.9303	0.01497	0.148388	0.100884	0.919643	0.99901
chr1:64537834-64538746	17.8779	0.0310397	0.127582	0.243293	0.807779	0.99901
chr1:64575754-64576682	22.8121	-0.045419	0.132509	-0.342763	0.731777	0.99901
chr1:64743839-64747206	680.933	0.053848	0.120034	0.448606	0.653716	0.99901
chr1:64963670-64967421	886.361	-0.00919626	0.116517	-0.0789267	0.937091	0.99901
chr1:65001793-65003445	101.573	0.0687019	0.148433	0.462847	0.643474	0.99901
chr1:65063392-65069873	1209.75	0.0136958	0.112938	0.121269	0.903478	0.99901
chr1:65146790-65151077	614.189	0.12072	0.129152	0.934713	0.349936	0.99901
chr1:65253772-65257964	773.053	0.0258143	0.117434	0.219821	0.826011	0.99901
chr1:65264438-65267212	333.155	-0.0376026	0.131037	-0.28696	0.774143	0.99901
chr1:65307922-65312579	686.734	-0.00371536	0.121927	-0.0304719	0.975691	0.99901
chr1:65419223-65423613	931.481	-0.0653612	0.11938	-0.547504	0.584032	0.99901
chr1:65524874-65526393	127.242	0.182113	0.148591	1.2256	0.22035	0.99901
chr1:65791613-65795441	629.269	0.0455562	0.120336	0.378575	0.705004	0.99901
chr1:65918197-65921643	155.389	-0.157833	0.148833	-1.06047	0.28893	0.99901
chr1:65991357-65997050	1005.24	-0.104555	0.135519	-0.771512	0.440404	0.99901
chr1:66331347-66332900	32.5701	-0.0708347	0.135862	-0.521373	0.602107	0.99901
chr1:66352194-66362421	985.382	-0.0549356	0.138109	-0.397768	0.690801	0.99901
chr1:66531044-66540659	1738.46	-0.157071	0.140218	-1.12019	0.262632	0.99901
chr1:66599891-66600947	26.6206	0.11767	0.139689	0.84237	0.399581	0.99901
chr1:66752041-66752937	59.0195	-0.0225764	0.148489	-0.152041	0.879155	0.99901
chr1:66921959-66927899	1327.32	-0.133362	0.11912	-1.11956	0.262903	0.99901
chr1:66928705-66933636	855.994	-0.0556031	0.130616	-0.425699	0.670327	0.99901
chr1:67050743-67055009	940.565	-0.0663706	0.113056	-0.587062	0.557162	0.99901
chr1:67134655-67135264	18.2353	-0.0379065	0.126262	-0.300222	0.764008	0.99901
chr1:67307028-67308393	142.044	0.161917	0.142955	1.13264	0.257366	0.99901
chr1:67425509-67431958	1759.23	-0.153905	0.119894	-1.28368	0.199255	0.99901
chr1:67684286-67688202	991.207	0.0181423	0.120763	0.15023	0.880583	0.99901
chr1:67766299-67766874	16.6046	0.0510179	0.120655	0.422842	0.67241	0.99901
chr1:67831191-67833865	343.122	-0.0062642	0.126374	-0.0495686	0.960466	0.99901
chr1:67856040-67857002	15.4763	-0.0454397	0.120034	-0.378557	0.705017	0.99901
chr1:68050103-68051975	101.71	-0.0744143	0.146168	-0.509102	0.610681	0.99901
chr1:68173197-68174414	33.4135	0.061498	0.133536	0.460534	0.645133	0.99901
chr1:68229520-68233349	485.248	-0.128103	0.125524	-1.02054	0.307471	0.99901
chr1:68293640-68294553	19.3829	0.0375688	0.131588	0.285503	0.775259	0.99901
chr1:68313585-68314644	23.614	-0.0765034	0.134154	-0.570264	0.568499	0.99901
chr1:68320028-68320621	14.3115	-0.0824902	0.121398	-0.679504	0.496818	0.99901
chr1:68365493-68366783	25.6889	-0.0574285	0.131706	-0.436034	0.662812	0.99901
chr1:68495437-68497835	463.228	0.0102621	0.123767	0.0829142	0.93392	0.99901
chr1:69245860-69247584	47.0179	-0.00297212	0.142584	-0.0208447	0.98337	0.99901
chr1:69566182-69575273	1881.3	-0.0372415	0.119747	-0.311001	0.7558	0.99901
chr1:70139732-70141195	33.8965	0.033355	0.14174	0.235325	0.813957	0.99901
chr1:70201603-70208165	1655.86	-0.208901	0.138699	-1.50614	0.132031	0.99901
chr1:70220543-70224907	899.909	-0.14717	0.137317	-1.07176	0.28383	0.99901
chr1:70349257-70356067	1433.63	-0.125474	0.12039	-1.04223	0.297305	0.99901
chr1:70410034-70413730	873.148	-0.107901	0.123413	-0.874312	0.381948	0.99901
chr1:71046883-71048432	208.966	0.162218	0.140869	1.15156	0.249503	0.99901
chr1:71078147-71082161	860.069	-0.16663	0.141597	-1.17679	0.239278	0.99901
chr1:72276831-72286729	2135.89	-0.112926	0.130666	-0.864229	0.387462	0.99901
chr1:73065313-73066238	33.7547	-0.13136	0.140625	-0.934115	0.350245	0.99901
chr1:73914557-73915404	19.3518	-0.0475578	0.130702	-0.363863	0.71596	0.99901
chr1:74197466-74199839	373.216	-0.228442	0.141888	-1.61002	0.107393	0.99901
chr1:74357385-74358293	32.5228	0.110216	0.139657	0.789193	0.429999	0.99901
chr1:74504486-74506884	49.9498	-0.155272	0.146051	-1.06314	0.287719	0.99901
chr1:74673084-74674149	65.0535	-0.0206624	0.148838	-0.138825	0.889588	0.99901
chr1:74732728-74734119	78.3818	0.109737	0.094393	1.16256	0.24501	0.99901
chr1:75129811-75131805	46.0858	0.0774385	0.146136	0.529907	0.596176	0.99901
chr1:75134671-75136913	93.4208	-0.00259042	0.14713	-0.0176064	0.985953	0.99901
chr1:75338687-75339218	20.1804	-0.0545449	0.130356	-0.418429	0.675633	0.99901
chr1:75342370-75343203	20.5583	-0.0572385	0.127033	-0.450579	0.652293	0.99901
chr1:75613054-75617240	893.255	0.0513818	0.117835	0.436048	0.662802	0.99901
chr1:75676862-75678242	42.6363	-0.0986709	0.128735	-0.766464	0.4434	0.99901
chr1:75723237-75727178	721.195	-0.0970504	0.132828	-0.730649	0.464994	0.99901
chr1:75785127-75790358	1052.56	-0.182394	0.141888	-1.28548	0.198626	0.99901
chr1:76074013-76076094	441.369	-0.00870354	0.123502	-0.0704729	0.943817	0.99901
chr1:76154326-76154862	27.2059	0.0720857	0.139277	0.517572	0.604757	0.99901
chr1:76293830-76295378	25.4275	-0.1264	0.127038	-0.994981	0.319745	0.99901
chr1:76404012-76404777	17.5116	-0.00378255	0.127974	-0.0295573	0.97642	0.99901
chr1:76764549-76765378	25.0263	-0.0775707	0.132851	-0.583891	0.559294	0.99901
chr1:76866557-76871629	1345.61	-0.0499942	0.114364	-0.437148	0.662004	0.99901
chr1:76933694-76935535	59.2251	-0.0711861	0.145571	-0.489011	0.624834	0.99901
chr1:77016348-77017695	32.5623	-0.05238	0.13913	-0.376481	0.706559	0.99901
chr1:77218049-77221047	721.295	-0.181032	0.141386	-1.28041	0.2004	0.99901
[truncated: 27,317 more rows]

## Sheet: DESeq2_BIN1-SVA-KO_H3K27ac
Peak location	base mean	log2FC	StdErr	Wald-Stats	P-value	Padj
[truncated: 84,470 more rows]

## Sheet: DESeq2_BCKDK-SVA-KO_NCBIrefSeq
GeneID	BaseMean	Log2(FC)	StdErr	Wald-Stats	Pvalue	P-adj	chrom	start	stop	strand		name
[truncated: 38,557 more rows]

[truncated: 1 more sheets: DESeq2_BIN1-SVA-KO_NCBIrefSeq]
