# Supplementary material for: A hidden layer of structural variation in transposable elements reveals potential genetic modifiers in human disease-risk loci
Source: HighWire-hosted journal article supplement (doi:10.1101/gr.275515.121), 2022-03-24
Supplement: Supplemental_Table_S4.xlsx [file Supplemental_Table_S4.xlsx]

## Sheet: README
Supplemental Table S4: DESeq2 results for CD2AP-SVA KO
DESeq2 results for RNA-Capture-seq of WT vs CD2AP-SVA KO cortical organoids.
Dataset shown in Figure 7c,d.

## Sheet: DESeq2_CapCD2AP-SVA-KO_Ensembl
Exon_ID	BaseMean	Log2(FC)	StdErr	Wald-Stats	Pvalue	P-adj	chrom	start	stop	Gene_ID	Transcript_ID	Gene_name	Transcript_name	Exon_number	EV.1_rep1	EV.1_rep2	EV.1_rep3	CD2AP_rep1	CD2AP_rep2	CD2AP_rep3
ENSE00001162856	55762.1	-0.226002	0.159796	-1.41431	0.157271	0.226283	chr1	212363928	212365376	ENSG00000065600	ENST00000261455	PACC1	PACC1-201	8	56603.9	55378.5	52885.3	48967.6	47578.3	44417.4
ENSE00002271703	53678	-0.232124	0.15696	-1.47887	0.139174	0.203086	chr1	212364476	212365376	ENSG00000065600	ENST00000535273	PACC1	PACC1-205	9	54861.6	53368.3	50956.6	47108.7	45524.7	42896.1
ENSE00001010450	11298.4	-0.188296	0.0782933	-2.40501	0.0161722	0.0339968	chr1	212375193	212375300	ENSG00000065600	ENST00000261455	PACC1	PACC1-201	7	12113.8	12084.2	10464.3	10594.7	9595.77	10233.1
ENSE00001010450	11298.4	-0.188296	0.0782933	-2.40501	0.0161722	0.0339968	chr1	212375193	212375300	ENSG00000065600	ENST00000535273	PACC1	PACC1-205	8	12113.8	12084.2	10464.3	10594.7	9595.77	10233.1
ENSE00001906701	9328.34	-0.154953	0.0819089	-1.89177	0.0585211	0.0958466	chr1	212375221	212375300	ENSG00000065600	ENST00000478166	PACC1	PACC1-204	3	9480.47	10122.6	8588.54	8935.72	7909.26	8477.98
ENSE00001877747	8093.91	-0.0863574	0.086266	-1.00106	0.316798	0.40898	chr1	212375248	212375300	ENSG00000065600	ENST00000467822	PACC1	PACC1-202	6	8173.02	8297.12	7250.92	7748.63	7185.05	7412.1
ENSE00001916982	30.0131	0.643997	1.35924	0.473791	0.635649	0.71516	chr1	212376794	212376884	ENSG00000065600	ENST00000478166	PACC1	PACC1-204	2	4.84241	27.0507	38.8568	69.6943	40.9228	0
ENSE00003656453	9397.42	0.129471	0.103309	1.25324	0.210118	0.291615	chr1	212377562	212377706	ENSG00000065600	ENST00000535273	PACC1	PACC1-205	7	8722.15	8821.34	7726.62	9195.07	10115.4	8339.6
ENSE00003656453	9397.42	0.129471	0.103309	1.25324	0.210118	0.291615	chr1	212377562	212377706	ENSG00000065600	ENST00000261455	PACC1	PACC1-201	6	8722.15	8821.34	7726.62	9195.07	10115.4	8339.6
ENSE00003685405	9397.42	0.129471	0.103309	1.25324	0.210118	0.291615	chr1	212377562	212377706	ENSG00000065600	ENST00000467822	PACC1	PACC1-202	5	8722.15	8821.34	7726.62	9195.07	10115.4	8339.6
ENSE00003685405	9397.42	0.129471	0.103309	1.25324	0.210118	0.291615	chr1	212377562	212377706	ENSG00000065600	ENST00000478166	PACC1	PACC1-204	1	8722.15	8821.34	7726.62	9195.07	10115.4	8339.6
ENSE00003480654	8552.82	0.200173	0.0933854	2.14351	0.0320722	0.0583324	chr1	212379895	212380037	ENSG00000065600	ENST00000467822	PACC1	PACC1-202	4	7535.76	7530.37	7168.5	7850.32	9461.84	8236.25
ENSE00003570815	8552.82	0.200173	0.0933854	2.14351	0.0320722	0.0583324	chr1	212379895	212380037	ENSG00000065600	ENST00000261455	PACC1	PACC1-201	5	7535.76	7530.37	7168.5	7850.32	9461.84	8236.25
ENSE00003570815	8552.82	0.200173	0.0933854	2.14351	0.0320722	0.0583324	chr1	212379895	212380037	ENSG00000065600	ENST00000535273	PACC1	PACC1-205	6	7535.76	7530.37	7168.5	7850.32	9461.84	8236.25
ENSE00003590563	12674.3	0.301491	0.128612	2.34419	0.0190685	0.0391321	chr1	212385274	212385425	ENSG00000065600	ENST00000535273	PACC1	PACC1-205	5	10760.8	10571.2	10066.3	11000.3	14547.4	13149.6
ENSE00003590563	12674.3	0.301491	0.128612	2.34419	0.0190685	0.0391321	chr1	212385274	212385425	ENSG00000065600	ENST00000261455	PACC1	PACC1-201	4	10760.8	10571.2	10066.3	11000.3	14547.4	13149.6
ENSE00003595888	12674.3	0.301491	0.128612	2.34419	0.0190685	0.0391321	chr1	212385274	212385425	ENSG00000065600	ENST00000471937	PACC1	PACC1-203	5	10760.8	10571.2	10066.3	11000.3	14547.4	13149.6
ENSE00003595888	12674.3	0.301491	0.128612	2.34419	0.0190685	0.0391321	chr1	212385274	212385425	ENSG00000065600	ENST00000467822	PACC1	PACC1-202	3	10760.8	10571.2	10066.3	11000.3	14547.4	13149.6
ENSE00003580816	13413.2	0.413467	0.160686	2.57313	0.0100783	0.0233647	chr1	212386891	212387100	ENSG00000065600	ENST00000535273	PACC1	PACC1-205	4	11038.8	10056.3	10261.7	10650.7	15475	15637
ENSE00003580816	13413.2	0.413467	0.160686	2.57313	0.0100783	0.0233647	chr1	212386891	212387100	ENSG00000065600	ENST00000261455	PACC1	PACC1-201	3	11038.8	10056.3	10261.7	10650.7	15475	15637
ENSE00003643659	13413.2	0.413467	0.160686	2.57313	0.0100783	0.0233647	chr1	212386891	212387100	ENSG00000065600	ENST00000467822	PACC1	PACC1-202	2	11038.8	10056.3	10261.7	10650.7	15475	15637
ENSE00003643659	13413.2	0.413467	0.160686	2.57313	0.0100783	0.0233647	chr1	212386891	212387100	ENSG00000065600	ENST00000471937	PACC1	PACC1-203	4	11038.8	10056.3	10261.7	10650.7	15475	15637
ENSE00001864672	76.631	1.06499	0.648638	1.64188	0.100615	0.154201	chr1	212387613	212387732	ENSG00000065600	ENST00000471937	PACC1	PACC1-203	3	28.086	66.2277	81.2461	42.2736	177.332	147.138
ENSE00001943363	45.3677	1.13626	0.834171	1.36215	0.173151	0.247188	chr1	212410126	212410164	ENSG00000065600	ENST00000467822	PACC1	PACC1-202	1	18.4012	19.5885	52.9866	31.9908	76.8852	90.2099
ENSE00003605747	2925.32	0.929652	0.368931	2.51985	0.0117403	0.0264144	chr1	212410425	212410521	ENSG00000065600	ENST00000535273	PACC1	PACC1-205	3	2135.5	1768.56	2075.9	2359.32	3877.74	5152.47
ENSE00003605747	2925.32	0.929652	0.368931	2.51985	0.0117403	0.0264144	chr1	212410425	212410521	ENSG00000065600	ENST00000261455	PACC1	PACC1-201	2	2135.5	1768.56	2075.9	2359.32	3877.74	5152.47
ENSE00003680357	2925.32	0.929652	0.368931	2.51985	0.0117403	0.0264144	chr1	212410425	212410521	ENSG00000065600	ENST00000471937	PACC1	PACC1-203	2	2135.5	1768.56	2075.9	2359.32	3877.74	5152.47
ENSE00002233408	81.4144	0.49442	0.556227	0.888881	0.374067	0.473627	chr1	212413898	212414080	ENSG00000065600	ENST00000535273	PACC1	PACC1-205	2	71.6677	65.2949	71.8263	45.7011	97.9666	149.766
ENSE00002295617	394.21	1.14621	0.469852	2.43951	0.0147071	0.0314388	chr1	212414722	212414901	ENSG00000065600	ENST00000535273	PACC1	PACC1-205	1	229.53	214.54	306.145	322.193	416.668	919.615
ENSE00003562584	394.21	1.14621	0.469852	2.43951	0.0147071	0.0314388	chr1	212414722	212414895	ENSG00000065600	ENST00000471937	PACC1	PACC1-203	1	229.53	214.54	306.145	322.193	416.668	919.615
ENSE00003658107	394.21	1.14621	0.469852	2.43951	0.0147071	0.0314388	chr1	212414722	212414886	ENSG00000065600	ENST00000261455	PACC1	PACC1-201	1	229.53	214.54	306.145	322.193	416.668	919.615
ENSE00003805250	465043	1.05296	0.131056	8.03441	9.40326e-16	1.53245e-14	chr11	31784779	31790019	ENSG00000007372	ENST00000606377	PAX6	PAX6-231	13	334866	350360	313614	762201	727265	582912
ENSE00001213516	465038	1.05296	0.13104	8.03536	9.33072e-16	1.53245e-14	chr11	31784792	31790019	ENSG00000007372	ENST00000638914	PAX6	PAX6-244	14	334866	350360	313614	762201	727265	582912
ENSE00001213516	465038	1.05296	0.13104	8.03536	9.33072e-16	1.53245e-14	chr11	31784792	31790019	ENSG00000007372	ENST00000643871	PAX6	PAX6-282	13	334866	350360	313614	762201	727265	582912
ENSE00001213516	465038	1.05296	0.13104	8.03536	9.33072e-16	1.53245e-14	chr11	31784792	31790019	ENSG00000007372	ENST00000419022	PAX6	PAX6-209	14	334866	350360	313614	762201	727265	582912
ENSE00001213516	465038	1.05296	0.13104	8.03536	9.33072e-16	1.53245e-14	chr11	31784792	31790019	ENSG00000007372	ENST00000639386	PAX6	PAX6-254	10	334866	350360	313614	762201	727265	582912
ENSE00003807020	296059	1.03064	0.136348	7.55885	4.06633e-14	5.35092e-13	chr11	31788908	31790019	ENSG00000007372	ENST00000640610	PAX6	PAX6-272	13	214915	226524	199476	480773	462969	365607
ENSE00003807020	296059	1.03064	0.136348	7.55885	4.06633e-14	5.35092e-13	chr11	31788908	31790019	ENSG00000007372	ENST00000379132	PAX6	PAX6-208	12	214915	226524	199476	480773	462969	365607
ENSE00003809562	296033	1.03064	0.136384	7.55688	4.1286e-14	5.35092e-13	chr11	31788911	31790019	ENSG00000007372	ENST00000379109	PAX6	PAX6-203	12	214897	226515	199460	480765	462939	365559
ENSE00003807235	296011	1.03074	0.136395	7.55703	4.12384e-14	5.35092e-13	chr11	31788912	31790019	ENSG00000007372	ENST00000379129	PAX6	PAX6-207	13	214897	226464	199419	480760	462911	365497
ENSE00003806400	291854	1.03264	0.134119	7.69943	1.36669e-14	1.84391e-13	chr11	31789026	31790019	ENSG00000007372	ENST00000638685	PAX6	PAX6-236	8	211656	222748	197240	473256	458352	360595
ENSE00003810826	291854	1.03264	0.134119	7.69943	1.36669e-14	1.84391e-13	chr11	31789026	31790019	ENSG00000007372	ENST00000639916	PAX6	PAX6-258	12	211656	222748	197240	473256	458352	360595
ENSE00003810826	291854	1.03264	0.134119	7.69943	1.36669e-14	1.84391e-13	chr11	31789026	31790019	ENSG00000007372	ENST00000640368	PAX6	PAX6-269	14	211656	222748	197240	473256	458352	360595
ENSE00002170607	276345	1.04321	0.126261	8.2623	1.42896e-16	2.61341e-15	chr11	31789194	31790019	ENSG00000007372	ENST00000379107	PAX6	PAX6-202	13	200785	210016	187867	448556	440777	344413
ENSE00003810060	276105	1.04335	0.12592	8.28578	1.17335e-16	2.17004e-15	chr11	31789202	31790019	ENSG00000007372	ENST00000640975	PAX6	PAX6-281	14	200631	209855	187813	448357	440511	344236
ENSE00003810060	276105	1.04335	0.12592	8.28578	1.17335e-16	2.17004e-15	chr11	31789202	31790019	ENSG00000007372	ENST00000639409	PAX6	PAX6-256	14	200631	209855	187813	448357	440511	344236
ENSE00003803470	213863	1.10206	0.116061	9.49554	2.1907e-21	6.43908e-20	chr11	31789517	31790019	ENSG00000007372	ENST00000638963	PAX6	PAX6-245	9	154101	158765	144019	348606	357834	274321
ENSE00001822613	122058	1.24603	0.142777	8.72707	2.61352e-18	5.37732e-17	chr11	31789830	31790019	ENSG00000007372	ENST00000638965	PAX6	PAX6-246	7	85631.2	85689.3	76155.9	197907	225403	163680
ENSE00002201673	76611.9	1.35674	0.177843	7.62888	2.36801e-14	3.16468e-13	chr11	31789913	31790019	ENSG00000007372	ENST00000241001	PAX6	PAX6-201	13	52891.7	51516.8	45533.2	123222	152715	108078
ENSE00001920965	75622.8	1.36079	0.178394	7.62801	2.38409e-14	3.16468e-13	chr11	31789918	31790019	ENSG00000007372	ENST00000474783	PAX6	PAX6-216	12	52055.9	50766.8	44958.5	121765	150984	106796
ENSE00002194708	72389.4	1.38171	0.194843	7.0914	1.32758e-12	1.5281e-11	chr11	31789934	31790019	ENSG00000007372	ENST00000640125	PAX6	PAX6-263	10	49712.2	48347.2	42495.3	116514	146619	103125
ENSE00002194708	72389.4	1.38171	0.194843	7.0914	1.32758e-12	1.5281e-11	chr11	31789934	31790019	ENSG00000007372	ENST00000638755	PAX6	PAX6-238	10	49712.2	48347.2	42495.3	116514	146619	103125
ENSE00002194708	72389.4	1.38171	0.194843	7.0914	1.32758e-12	1.5281e-11	chr11	31789934	31790019	ENSG00000007372	ENST00000481563	PAX6	PAX6-217	11	49712.2	48347.2	42495.3	116514	146619	103125
ENSE00002194708	72389.4	1.38171	0.194843	7.0914	1.32758e-12	1.5281e-11	chr11	31789934	31790019	ENSG00000007372	ENST00000639548	PAX6	PAX6-257	11	49712.2	48347.2	42495.3	116514	146619	103125
ENSE00002194708	72389.4	1.38171	0.194843	7.0914	1.32758e-12	1.5281e-11	chr11	31789934	31790019	ENSG00000007372	ENST00000638696	PAX6	PAX6-237	11	49712.2	48347.2	42495.3	116514	146619	103125
ENSE00002194708	72389.4	1.38171	0.194843	7.0914	1.32758e-12	1.5281e-11	chr11	31789934	31790019	ENSG00000007372	ENST00000638629	PAX6	PAX6-235	10	49712.2	48347.2	42495.3	116514	146619	103125
ENSE00003695009	72176.9	1.38208	0.197662	6.99214	2.70726e-12	2.91252e-11	chr11	31789936	31790019	ENSG00000007372	ENST00000470027	PAX6	PAX6-214	8	49615.3	48183	42397.5	116244	146346	102826
ENSE00003695009	72176.9	1.38208	0.197662	6.99214	2.70726e-12	2.91252e-11	chr11	31789936	31790019	ENSG00000007372	ENST00000533333	PAX6	PAX6-228	11	49615.3	48183	42397.5	116244	146346	102826
ENSE00003702433	72176.9	1.38208	0.197662	6.99214	2.70726e-12	2.91252e-11	chr11	31789936	31790019	ENSG00000007372	ENST00000640287	PAX6	PAX6-267	10	49615.3	48183	42397.5	116244	146346	102826
ENSE00002145051	72157.9	1.38195	0.197758	6.98808	2.7868e-12	2.97861e-11	chr11	31789938	31790019	ENSG00000007372	ENST00000640613	PAX6	PAX6-273	13	49614.4	48175.5	42384.6	116179	146335	102812
ENSE00003809485	72091.2	1.3814	0.1983	6.96619	3.25647e-12	3.37987e-11	chr11	31789941	31790019	ENSG00000007372	ENST00000423822	PAX6	PAX6-210	14	49589.2	48154.1	42364.6	116079	146193	102741
ENSE00003801400	72075.1	1.38123	0.198357	6.96334	3.32295e-12	3.37987e-11	chr11	31789946	31790019	ENSG00000007372	ENST00000640963	PAX6	PAX6-280	11	49580.5	48145.7	42364.6	116059	146144	102724
ENSE00003804533	72075.1	1.38123	0.198357	6.96334	3.32295e-12	3.37987e-11	chr11	31789946	31790019	ENSG00000007372	ENST00000639061	PAX6	PAX6-250	10	49580.5	48145.7	42364.6	116059	146144	102724
ENSE00003804533	72075.1	1.38123	0.198357	6.96334	3.32295e-12	3.37987e-11	chr11	31789946	31790019	ENSG00000007372	ENST00000639950	PAX6	PAX6-261	13	49580.5	48145.7	42364.6	116059	146144	102724
ENSE00003804533	72075.1	1.38123	0.198357	6.96334	3.32295e-12	3.37987e-11	chr11	31789946	31790019	ENSG00000007372	ENST00000379111	PAX6	PAX6-204	13	49580.5	48145.7	42364.6	116059	146144	102724
ENSE00003804533	72075.1	1.38123	0.198357	6.96334	3.32295e-12	3.37987e-11	chr11	31789946	31790019	ENSG00000007372	ENST00000640766	PAX6	PAX6-277	11	49580.5	48145.7	42364.6	116059	146144	102724
ENSE00003811322	72075.1	1.38123	0.198357	6.96334	3.32295e-12	3.37987e-11	chr11	31789946	31790019	ENSG00000007372	ENST00000471303	PAX6	PAX6-215	10	49580.5	48145.7	42364.6	116059	146144	102724
ENSE00003806501	72073.7	1.3812	0.198357	6.96319	3.32648e-12	3.37987e-11	chr11	31789947	31790019	ENSG00000007372	ENST00000494377	PAX6	PAX6-218	7	49580.5	48145.7	42364.6	116057	146140	102722
ENSE00003806501	72073.7	1.3812	0.198357	6.96319	3.32648e-12	3.37987e-11	chr11	31789947	31790019	ENSG00000007372	ENST00000464174	PAX6	PAX6-213	7	49580.5	48145.7	42364.6	116057	146140	102722
ENSE00003807710	72073.7	1.3812	0.198357	6.96319	3.32648e-12	3.37987e-11	chr11	31789947	31790019	ENSG00000007372	ENST00000379123	PAX6	PAX6-206	14	49580.5	48145.7	42364.6	116057	146140	102722
ENSE00003807710	72073.7	1.3812	0.198357	6.96319	3.32648e-12	3.37987e-11	chr11	31789947	31790019	ENSG00000007372	ENST00000638250	PAX6	PAX6-232	11	49580.5	48145.7	42364.6	116057	146140	102722
ENSE00003802125	72027.7	1.38138	0.19879	6.94896	3.67984e-12	3.71596e-11	chr11	31789949	31790019	ENSG00000007372	ENST00000640038	PAX6	PAX6-262	5	49549.5	48114	42335.1	115977	146089	102660
ENSE00003806430	71970	1.3811	0.199196	6.93341	4.10828e-12	4.04924e-11	chr11	31789951	31790019	ENSG00000007372	ENST00000524853	PAX6	PAX6-219	13	49525.3	48079.4	42309.2	115876	145994	102564
ENSE00003803128	71953.9	1.38104	0.199293	6.92971	4.21705e-12	4.1317e-11	chr11	31789952	31790019	ENSG00000007372	ENST00000640872	PAX6	PAX6-279	9	49514.6	48070.1	42305.7	115841	145974	102543
ENSE00003804913	71876.1	1.38095	0.199773	6.91261	4.75818e-12	4.6343e-11	chr11	31789957	31790019	ENSG00000007372	ENST00000639394	PAX6	PAX6-255	13	49469.1	48030.9	42268	115726	145865	102426
ENSE00003802298	71754.6	1.38137	0.200043	6.90535	5.00787e-12	4.82044e-11	chr11	31789962	31790019	ENSG00000007372	ENST00000640735	PAX6	PAX6-276	6	49355.8	47958.2	42212.7	115559	145683	102252
ENSE00003802298	71754.6	1.38137	0.200043	6.90535	5.00787e-12	4.82044e-11	chr11	31789962	31790019	ENSG00000007372	ENST00000638913	PAX6	PAX6-243	12	49355.8	47958.2	42212.7	115559	145683	102252
ENSE00003807403	71754.6	1.38137	0.200043	6.90535	5.00787e-12	4.82044e-11	chr11	31789962	31790019	ENSG00000007372	ENST00000639109	PAX6	PAX6-252	9	49355.8	47958.2	42212.7	115559	145683	102252
ENSE00003807403	71754.6	1.38137	0.200043	6.90535	5.00787e-12	4.82044e-11	chr11	31789962	31790019	ENSG00000007372	ENST00000638853	PAX6	PAX6-241	12	49355.8	47958.2	42212.7	115559	145683	102252
ENSE00003807403	71754.6	1.38137	0.200043	6.90535	5.00787e-12	4.82044e-11	chr11	31789962	31790019	ENSG00000007372	ENST00000640460	PAX6	PAX6-271	12	49355.8	47958.2	42212.7	115559	145683	102252
ENSE00003805318	60231.2	1.44266	0.203969	7.07293	1.51693e-12	1.73394e-11	chr11	31790006	31790019	ENSG00000007372	ENST00000638802	PAX6	PAX6-240	11	39793.9	39129.4	34235.2	96351.7	123650	87592
ENSE00003808521	57751	1.47331	0.209305	7.03904	1.93569e-12	2.13835e-11	chr11	31790014	31790019	ENSG00000007372	ENST00000638346	PAX6	PAX6-234	10	37894.8	36835.7	32244.1	92672.8	120619	83734.9
ENSE00003808837	271992	1.76217	0.193384	9.11226	8.0684e-20	2.25095e-18	chr11	31790710	31793553	ENSG00000007372	ENST00000474783	PAX6	PAX6-216	11	151199	142645	126698	409703	589948	426864
ENSE00003699697	146988	1.85504	0.215333	8.61475	7.00953e-18	1.39008e-16	chr11	31790710	31790860	ENSG00000007372	ENST00000640735	PAX6	PAX6-276	5	79368.1	73504.3	66481.7	217245	324019	252277
ENSE00003699697	146988	1.85504	0.215333	8.61475	7.00953e-18	1.39008e-16	chr11	31790710	31790860	ENSG00000007372	ENST00000464174	PAX6	PAX6-213	6	79368.1	73504.3	66481.7	217245	324019	252277
ENSE00003699697	146988	1.85504	0.215333	8.61475	7.00953e-18	1.39008e-16	chr11	31790710	31790860	ENSG00000007372	ENST00000471303	PAX6	PAX6-215	9	79368.1	73504.3	66481.7	217245	324019	252277
ENSE00003699697	146988	1.85504	0.215333	8.61475	7.00953e-18	1.39008e-16	chr11	31790710	31790860	ENSG00000007372	ENST00000470027	PAX6	PAX6-214	7	79368.1	73504.3	66481.7	217245	324019	252277
ENSE00003699697	146988	1.85504	0.215333	8.61475	7.00953e-18	1.39008e-16	chr11	31790710	31790860	ENSG00000007372	ENST00000639394	PAX6	PAX6-255	12	79368.1	73504.3	66481.7	217245	324019	252277
ENSE00003699697	146988	1.85504	0.215333	8.61475	7.00953e-18	1.39008e-16	chr11	31790710	31790860	ENSG00000007372	ENST00000640038	PAX6	PAX6-262	4	79368.1	73504.3	66481.7	217245	324019	252277
ENSE00003699697	146988	1.85504	0.215333	8.61475	7.00953e-18	1.39008e-16	chr11	31790710	31790860	ENSG00000007372	ENST00000533333	PAX6	PAX6-228	10	79368.1	73504.3	66481.7	217245	324019	252277
ENSE00003699697	146988	1.85504	0.215333	8.61475	7.00953e-18	1.39008e-16	chr11	31790710	31790860	ENSG00000007372	ENST00000638913	PAX6	PAX6-243	11	79368.1	73504.3	66481.7	217245	324019	252277
ENSE00003700637	146988	1.85504	0.215333	8.61475	7.00953e-18	1.39008e-16	chr11	31790710	31790860	ENSG00000007372	ENST00000640460	PAX6	PAX6-271	11	79368.1	73504.3	66481.7	217245	324019	252277
ENSE00003700637	146988	1.85504	0.215333	8.61475	7.00953e-18	1.39008e-16	chr11	31790710	31790860	ENSG00000007372	ENST00000606377	PAX6	PAX6-231	12	79368.1	73504.3	66481.7	217245	324019	252277
ENSE00003700637	146988	1.85504	0.215333	8.61475	7.00953e-18	1.39008e-16	chr11	31790710	31790860	ENSG00000007372	ENST00000639061	PAX6	PAX6-250	9	79368.1	73504.3	66481.7	217245	324019	252277
ENSE00003700637	146988	1.85504	0.215333	8.61475	7.00953e-18	1.39008e-16	chr11	31790710	31790860	ENSG00000007372	ENST00000379132	PAX6	PAX6-208	11	79368.1	73504.3	66481.7	217245	324019	252277
ENSE00003700637	146988	1.85504	0.215333	8.61475	7.00953e-18	1.39008e-16	chr11	31790710	31790860	ENSG00000007372	ENST00000639548	PAX6	PAX6-257	10	79368.1	73504.3	66481.7	217245	324019	252277
ENSE00003700637	146988	1.85504	0.215333	8.61475	7.00953e-18	1.39008e-16	chr11	31790710	31790860	ENSG00000007372	ENST00000640613	PAX6	PAX6-273	12	79368.1	73504.3	66481.7	217245	324019	252277
ENSE00003700637	146988	1.85504	0.215333	8.61475	7.00953e-18	1.39008e-16	chr11	31790710	31790860	ENSG00000007372	ENST00000638755	PAX6	PAX6-238	9	79368.1	73504.3	66481.7	217245	324019	252277
ENSE00003700637	146988	1.85504	0.215333	8.61475	7.00953e-18	1.39008e-16	chr11	31790710	31790860	ENSG00000007372	ENST00000638853	PAX6	PAX6-241	11	79368.1	73504.3	66481.7	217245	324019	252277
ENSE00003700637	146988	1.85504	0.215333	8.61475	7.00953e-18	1.39008e-16	chr11	31790710	31790860	ENSG00000007372	ENST00000640125	PAX6	PAX6-263	9	79368.1	73504.3	66481.7	217245	324019	252277
ENSE00003700637	146988	1.85504	0.215333	8.61475	7.00953e-18	1.39008e-16	chr11	31790710	31790860	ENSG00000007372	ENST00000639916	PAX6	PAX6-258	11	79368.1	73504.3	66481.7	217245	324019	252277
ENSE00003700637	146988	1.85504	0.215333	8.61475	7.00953e-18	1.39008e-16	chr11	31790710	31790860	ENSG00000007372	ENST00000419022	PAX6	PAX6-209	13	79368.1	73504.3	66481.7	217245	324019	252277
ENSE00003700637	146988	1.85504	0.215333	8.61475	7.00953e-18	1.39008e-16	chr11	31790710	31790860	ENSG00000007372	ENST00000639109	PAX6	PAX6-252	8	79368.1	73504.3	66481.7	217245	324019	252277
ENSE00003700637	146988	1.85504	0.215333	8.61475	7.00953e-18	1.39008e-16	chr11	31790710	31790860	ENSG00000007372	ENST00000643871	PAX6	PAX6-282	12	79368.1	73504.3	66481.7	217245	324019	252277
ENSE00003700637	146988	1.85504	0.215333	8.61475	7.00953e-18	1.39008e-16	chr11	31790710	31790860	ENSG00000007372	ENST00000640872	PAX6	PAX6-279	8	79368.1	73504.3	66481.7	217245	324019	252277
ENSE00003700637	146988	1.85504	0.215333	8.61475	7.00953e-18	1.39008e-16	chr11	31790710	31790860	ENSG00000007372	ENST00000481563	PAX6	PAX6-217	10	79368.1	73504.3	66481.7	217245	324019	252277
ENSE00003700637	146988	1.85504	0.215333	8.61475	7.00953e-18	1.39008e-16	chr11	31790710	31790860	ENSG00000007372	ENST00000241001	PAX6	PAX6-201	12	79368.1	73504.3	66481.7	217245	324019	252277
ENSE00003700637	146988	1.85504	0.215333	8.61475	7.00953e-18	1.39008e-16	chr11	31790710	31790860	ENSG00000007372	ENST00000423822	PAX6	PAX6-210	13	79368.1	73504.3	66481.7	217245	324019	252277
ENSE00003700637	146988	1.85504	0.215333	8.61475	7.00953e-18	1.39008e-16	chr11	31790710	31790860	ENSG00000007372	ENST00000638914	PAX6	PAX6-244	13	79368.1	73504.3	66481.7	217245	324019	252277
ENSE00003700637	146988	1.85504	0.215333	8.61475	7.00953e-18	1.39008e-16	chr11	31790710	31790860	ENSG00000007372	ENST00000639386	PAX6	PAX6-254	9	79368.1	73504.3	66481.7	217245	324019	252277
ENSE00003700637	146988	1.85504	0.215333	8.61475	7.00953e-18	1.39008e-16	chr11	31790710	31790860	ENSG00000007372	ENST00000379111	PAX6	PAX6-204	12	79368.1	73504.3	66481.7	217245	324019	252277
ENSE00003700637	146988	1.85504	0.215333	8.61475	7.00953e-18	1.39008e-16	chr11	31790710	31790860	ENSG00000007372	ENST00000639409	PAX6	PAX6-256	13	79368.1	73504.3	66481.7	217245	324019	252277
ENSE00003700637	146988	1.85504	0.215333	8.61475	7.00953e-18	1.39008e-16	chr11	31790710	31790860	ENSG00000007372	ENST00000524853	PAX6	PAX6-219	12	79368.1	73504.3	66481.7	217245	324019	252277
ENSE00003700637	146988	1.85504	0.215333	8.61475	7.00953e-18	1.39008e-16	chr11	31790710	31790860	ENSG00000007372	ENST00000379129	PAX6	PAX6-207	12	79368.1	73504.3	66481.7	217245	324019	252277
ENSE00003700637	146988	1.85504	0.215333	8.61475	7.00953e-18	1.39008e-16	chr11	31790710	31790860	ENSG00000007372	ENST00000379123	PAX6	PAX6-206	13	79368.1	73504.3	66481.7	217245	324019	252277
ENSE00003700637	146988	1.85504	0.215333	8.61475	7.00953e-18	1.39008e-16	chr11	31790710	31790860	ENSG00000007372	ENST00000379107	PAX6	PAX6-202	12	79368.1	73504.3	66481.7	217245	324019	252277
ENSE00003700637	146988	1.85504	0.215333	8.61475	7.00953e-18	1.39008e-16	chr11	31790710	31790860	ENSG00000007372	ENST00000640368	PAX6	PAX6-269	13	79368.1	73504.3	66481.7	217245	324019	252277
ENSE00003700637	146988	1.85504	0.215333	8.61475	7.00953e-18	1.39008e-16	chr11	31790710	31790860	ENSG00000007372	ENST00000638696	PAX6	PAX6-237	10	79368.1	73504.3	66481.7	217245	324019	252277
ENSE00003700637	146988	1.85504	0.215333	8.61475	7.00953e-18	1.39008e-16	chr11	31790710	31790860	ENSG00000007372	ENST00000638250	PAX6	PAX6-232	10	79368.1	73504.3	66481.7	217245	324019	252277
ENSE00003700637	146988	1.85504	0.215333	8.61475	7.00953e-18	1.39008e-16	chr11	31790710	31790860	ENSG00000007372	ENST00000379109	PAX6	PAX6-203	11	79368.1	73504.3	66481.7	217245	324019	252277
ENSE00003700637	146988	1.85504	0.215333	8.61475	7.00953e-18	1.39008e-16	chr11	31790710	31790860	ENSG00000007372	ENST00000638965	PAX6	PAX6-246	6	79368.1	73504.3	66481.7	217245	324019	252277
ENSE00003700637	146988	1.85504	0.215333	8.61475	7.00953e-18	1.39008e-16	chr11	31790710	31790860	ENSG00000007372	ENST00000639950	PAX6	PAX6-261	12	79368.1	73504.3	66481.7	217245	324019	252277
ENSE00003700637	146988	1.85504	0.215333	8.61475	7.00953e-18	1.39008e-16	chr11	31790710	31790860	ENSG00000007372	ENST00000640766	PAX6	PAX6-277	10	79368.1	73504.3	66481.7	217245	324019	252277
ENSE00003700637	146988	1.85504	0.215333	8.61475	7.00953e-18	1.39008e-16	chr11	31790710	31790860	ENSG00000007372	ENST00000638346	PAX6	PAX6-234	9	79368.1	73504.3	66481.7	217245	324019	252277
ENSE00003700637	146988	1.85504	0.215333	8.61475	7.00953e-18	1.39008e-16	chr11	31790710	31790860	ENSG00000007372	ENST00000640610	PAX6	PAX6-272	12	79368.1	73504.3	66481.7	217245	324019	252277
ENSE00003700637	146988	1.85504	0.215333	8.61475	7.00953e-18	1.39008e-16	chr11	31790710	31790860	ENSG00000007372	ENST00000638802	PAX6	PAX6-240	10	79368.1	73504.3	66481.7	217245	324019	252277
ENSE00003700637	146988	1.85504	0.215333	8.61475	7.00953e-18	1.39008e-16	chr11	31790710	31790860	ENSG00000007372	ENST00000638629	PAX6	PAX6-235	9	79368.1	73504.3	66481.7	217245	324019	252277
ENSE00003700637	146988	1.85504	0.215333	8.61475	7.00953e-18	1.39008e-16	chr11	31790710	31790860	ENSG00000007372	ENST00000640975	PAX6	PAX6-281	13	79368.1	73504.3	66481.7	217245	324019	252277
ENSE00003700637	146988	1.85504	0.215333	8.61475	7.00953e-18	1.39008e-16	chr11	31790710	31790860	ENSG00000007372	ENST00000640287	PAX6	PAX6-267	9	79368.1	73504.3	66481.7	217245	324019	252277
ENSE00001920858	144814	1.8678	0.226172	8.25831	1.47744e-16	2.67238e-15	chr11	31790718	31790860	ENSG00000007372	ENST00000530373	PAX6	PAX6-222	6	77857.2	72121	65247.7	214272	321768	249483
ENSE00003809744	142246	1.88644	0.230588	8.18101	2.8147e-16	4.82603e-15	chr11	31790727	31790860	ENSG00000007372	ENST00000379115	PAX6	PAX6-205	13	75614.2	70319.8	63399.1	209896	318080	245978
ENSE00003804686	139443	1.9043	0.234686	8.11422	4.88934e-16	8.2121e-15	chr11	31790738	31790860	ENSG00000007372	ENST00000639006	PAX6	PAX6-247	11	73471	68150.2	61672.9	205605	312946	242434
ENSE00003807882	130721	1.94814	0.24458	7.96522	1.64933e-15	2.61037e-14	chr11	31790762	31790860	ENSG00000007372	ENST00000639054	PAX6	PAX6-249	10	67125.5	62444.3	56459	191207	295436	231199
ENSE00003803285	130322	1.95234	0.244623	7.98103	1.45115e-15	2.31902e-14	chr11	31790763	31790860	ENSG00000007372	ENST00000640335	PAX6	PAX6-268	8	66585.1	62139.3	56270.6	190500	294810	230629
ENSE00003805656	128770	1.96748	0.247184	7.95957	1.72642e-15	2.70637e-14	chr11	31790769	31790860	ENSG00000007372	ENST00000638762	PAX6	PAX6-239	9	65575.9	60612.3	55055.4	187724	292678	228416
ENSE00003806579	126894	1.9694	0.25516	7.7183	1.17887e-14	1.63061e-13	chr11	31790774	31790860	ENSG00000007372	ENST00000438681	PAX6	PAX6-211	13	64974.5	59543.4	54207.7	185327	289453	225122
ENSE00003809060	120649	1.973	0.272747	7.23381	4.69644e-13	5.64259e-12	chr11	31790790	31790860	ENSG00000007372	ENST00000638878	PAX6	PAX6-242	9	61530.6	56639.6	52120	177517	276663	214354
ENSE00003803002	119544	1.98053	0.27424	7.22189	5.12696e-13	6.1152e-12	chr11	31790791	31790860	ENSG00000007372	ENST00000639943	PAX6	PAX6-260	12	60746.1	55961.5	51342.8	175748	274586	212859
ENSE00003803029	103629	2.02329	0.29855	6.77706	1.22643e-11	1.14699e-10	chr11	31790823	31790860	ENSG00000007372	ENST00000640431	PAX6	PAX6-270	13	52271.9	46697.1	43573.8	152250	240203	187000
ENSE00002195196	211154	1.85152	0.234492	7.89588	2.88269e-15	4.247e-14	chr11	31793173	31793553	ENSG00000007372	ENST00000532916	PAX6	PAX6-226	3	113296	105509	94393.9	317127	470064	343087
ENSE00003809274	211154	1.85152	0.234492	7.89588	2.88269e-15	4.247e-14	chr11	31793209	31793553	ENSG00000007372	ENST00000639034	PAX6	PAX6-248	11	113296	105509	94393.9	317127	470064	343087
ENSE00003808134	211154	1.85152	0.234492	7.89588	2.88269e-15	4.247e-14	chr11	31793219	31793553	ENSG00000007372	ENST00000531910	PAX6	PAX6-224	6	113296	105509	94393.9	317127	470064	343087
ENSE00003805861	211154	1.85152	0.234492	7.89588	2.88269e-15	4.247e-14	chr11	31793224	31793553	ENSG00000007372	ENST00000640172	PAX6	PAX6-264	11	113296	105509	94393.9	317127	470064	343087
ENSE00003803875	211154	1.85152	0.234498	7.89568	2.88738e-15	4.247e-14	chr11	31793247	31793553	ENSG00000007372	ENST00000640684	PAX6	PAX6-275	11	113296	105509	94393.9	317127	470064	343087
ENSE00003808651	211154	1.85153	0.234502	7.89557	2.88982e-15	4.247e-14	chr11	31793273	31793553	ENSG00000007372	ENST00000639079	PAX6	PAX6-251	7	113294	105509	94393.9	317127	470064	343087
ENSE00003697085	211114	1.85128	0.23462	7.89053	3.00896e-15	4.34451e-14	chr11	31793438	31793553	ENSG00000007372	ENST00000471303	PAX6	PAX6-215	8	113278	105506	94393.9	317094	469984	342933
ENSE00003697085	211114	1.85128	0.23462	7.89053	3.00896e-15	4.34451e-14	chr11	31793438	31793553	ENSG00000007372	ENST00000530373	PAX6	PAX6-222	5	113278	105506	94393.9	317094	469984	342933
ENSE00003697085	211114	1.85128	0.23462	7.89053	3.00896e-15	4.34451e-14	chr11	31793438	31793553	ENSG00000007372	ENST00000640735	PAX6	PAX6-276	4	113278	105506	94393.9	317094	469984	342933
ENSE00003697085	211114	1.85128	0.23462	7.89053	3.00896e-15	4.34451e-14	chr11	31793438	31793553	ENSG00000007372	ENST00000464174	PAX6	PAX6-213	5	113278	105506	94393.9	317094	469984	342933
ENSE00003697085	211114	1.85128	0.23462	7.89053	3.00896e-15	4.34451e-14	chr11	31793438	31793553	ENSG00000007372	ENST00000640038	PAX6	PAX6-262	3	113278	105506	94393.9	317094	469984	342933
ENSE00003697085	211114	1.85128	0.23462	7.89053	3.00896e-15	4.34451e-14	chr11	31793438	31793553	ENSG00000007372	ENST00000639394	PAX6	PAX6-255	11	113278	105506	94393.9	317094	469984	342933
ENSE00003697085	211114	1.85128	0.23462	7.89053	3.00896e-15	4.34451e-14	chr11	31793438	31793553	ENSG00000007372	ENST00000533333	PAX6	PAX6-228	9	113278	105506	94393.9	317094	469984	342933
ENSE00003697085	211114	1.85128	0.23462	7.89053	3.00896e-15	4.34451e-14	chr11	31793438	31793553	ENSG00000007372	ENST00000494377	PAX6	PAX6-218	6	113278	105506	94393.9	317094	469984	342933
ENSE00003697085	211114	1.85128	0.23462	7.89053	3.00896e-15	4.34451e-14	chr11	31793438	31793553	ENSG00000007372	ENST00000638913	PAX6	PAX6-243	10	113278	105506	94393.9	317094	469984	342933
ENSE00003697085	211114	1.85128	0.23462	7.89053	3.00896e-15	4.34451e-14	chr11	31793438	31793553	ENSG00000007372	ENST00000639054	PAX6	PAX6-249	9	113278	105506	94393.9	317094	469984	342933
ENSE00003697085	211114	1.85128	0.23462	7.89053	3.00896e-15	4.34451e-14	chr11	31793438	31793553	ENSG00000007372	ENST00000470027	PAX6	PAX6-214	6	113278	105506	94393.9	317094	469984	342933
ENSE00003701932	211114	1.85128	0.23462	7.89053	3.00896e-15	4.34451e-14	chr11	31793438	31793553	ENSG00000007372	ENST00000638762	PAX6	PAX6-239	8	113278	105506	94393.9	317094	469984	342933
ENSE00003701932	211114	1.85128	0.23462	7.89053	3.00896e-15	4.34451e-14	chr11	31793438	31793553	ENSG00000007372	ENST00000640613	PAX6	PAX6-273	11	113278	105506	94393.9	317094	469984	342933
ENSE00003701932	211114	1.85128	0.23462	7.89053	3.00896e-15	4.34451e-14	chr11	31793438	31793553	ENSG00000007372	ENST00000639943	PAX6	PAX6-260	11	113278	105506	94393.9	317094	469984	342933
ENSE00003701932	211114	1.85128	0.23462	7.89053	3.00896e-15	4.34451e-14	chr11	31793438	31793553	ENSG00000007372	ENST00000640963	PAX6	PAX6-280	10	113278	105506	94393.9	317094	469984	342933
ENSE00003701932	211114	1.85128	0.23462	7.89053	3.00896e-15	4.34451e-14	chr11	31793438	31793553	ENSG00000007372	ENST00000639548	PAX6	PAX6-257	9	113278	105506	94393.9	317094	469984	342933
ENSE00003701932	211114	1.85128	0.23462	7.89053	3.00896e-15	4.34451e-14	chr11	31793438	31793553	ENSG00000007372	ENST00000640431	PAX6	PAX6-270	12	113278	105506	94393.9	317094	469984	342933
ENSE00003701932	211114	1.85128	0.23462	7.89053	3.00896e-15	4.34451e-14	chr11	31793438	31793553	ENSG00000007372	ENST00000638755	PAX6	PAX6-238	8	113278	105506	94393.9	317094	469984	342933
ENSE00003701932	211114	1.85128	0.23462	7.89053	3.00896e-15	4.34451e-14	chr11	31793438	31793553	ENSG00000007372	ENST00000379115	PAX6	PAX6-205	12	113278	105506	94393.9	317094	469984	342933
ENSE00003701932	211114	1.85128	0.23462	7.89053	3.00896e-15	4.34451e-14	chr11	31793438	31793553	ENSG00000007372	ENST00000640460	PAX6	PAX6-271	10	113278	105506	94393.9	317094	469984	342933
ENSE00003701932	211114	1.85128	0.23462	7.89053	3.00896e-15	4.34451e-14	chr11	31793438	31793553	ENSG00000007372	ENST00000640125	PAX6	PAX6-263	8	113278	105506	94393.9	317094	469984	342933
ENSE00003701932	211114	1.85128	0.23462	7.89053	3.00896e-15	4.34451e-14	chr11	31793438	31793553	ENSG00000007372	ENST00000606377	PAX6	PAX6-231	11	113278	105506	94393.9	317094	469984	342933
ENSE00003701932	211114	1.85128	0.23462	7.89053	3.00896e-15	4.34451e-14	chr11	31793438	31793553	ENSG00000007372	ENST00000639006	PAX6	PAX6-247	10	113278	105506	94393.9	317094	469984	342933
ENSE00003701932	211114	1.85128	0.23462	7.89053	3.00896e-15	4.34451e-14	chr11	31793438	31793553	ENSG00000007372	ENST00000640368	PAX6	PAX6-269	12	113278	105506	94393.9	317094	469984	342933
ENSE00003701932	211114	1.85128	0.23462	7.89053	3.00896e-15	4.34451e-14	chr11	31793438	31793553	ENSG00000007372	ENST00000524853	PAX6	PAX6-219	11	113278	105506	94393.9	317094	469984	342933
ENSE00003701932	211114	1.85128	0.23462	7.89053	3.00896e-15	4.34451e-14	chr11	31793438	31793553	ENSG00000007372	ENST00000423822	PAX6	PAX6-210	12	113278	105506	94393.9	317094	469984	342933
ENSE00003701932	211114	1.85128	0.23462	7.89053	3.00896e-15	4.34451e-14	chr11	31793438	31793553	ENSG00000007372	ENST00000481563	PAX6	PAX6-217	9	113278	105506	94393.9	317094	469984	342933
ENSE00003701932	211114	1.85128	0.23462	7.89053	3.00896e-15	4.34451e-14	chr11	31793438	31793553	ENSG00000007372	ENST00000438681	PAX6	PAX6-211	12	113278	105506	94393.9	317094	469984	342933
ENSE00003701932	211114	1.85128	0.23462	7.89053	3.00896e-15	4.34451e-14	chr11	31793438	31793553	ENSG00000007372	ENST00000639409	PAX6	PAX6-256	12	113278	105506	94393.9	317094	469984	342933
ENSE00003701932	211114	1.85128	0.23462	7.89053	3.00896e-15	4.34451e-14	chr11	31793438	31793553	ENSG00000007372	ENST00000639386	PAX6	PAX6-254	8	113278	105506	94393.9	317094	469984	342933
ENSE00003701932	211114	1.85128	0.23462	7.89053	3.00896e-15	4.34451e-14	chr11	31793438	31793553	ENSG00000007372	ENST00000638685	PAX6	PAX6-236	7	113278	105506	94393.9	317094	469984	342933
ENSE00003701932	211114	1.85128	0.23462	7.89053	3.00896e-15	4.34451e-14	chr11	31793438	31793553	ENSG00000007372	ENST00000639061	PAX6	PAX6-250	8	113278	105506	94393.9	317094	469984	342933
ENSE00003701932	211114	1.85128	0.23462	7.89053	3.00896e-15	4.34451e-14	chr11	31793438	31793553	ENSG00000007372	ENST00000640335	PAX6	PAX6-268	7	113278	105506	94393.9	317094	469984	342933
ENSE00003701932	211114	1.85128	0.23462	7.89053	3.00896e-15	4.34451e-14	chr11	31793438	31793553	ENSG00000007372	ENST00000419022	PAX6	PAX6-209	12	113278	105506	94393.9	317094	469984	342933
ENSE00003701932	211114	1.85128	0.23462	7.89053	3.00896e-15	4.34451e-14	chr11	31793438	31793553	ENSG00000007372	ENST00000379129	PAX6	PAX6-207	11	113278	105506	94393.9	317094	469984	342933
ENSE00003701932	211114	1.85128	0.23462	7.89053	3.00896e-15	4.34451e-14	chr11	31793438	31793553	ENSG00000007372	ENST00000379111	PAX6	PAX6-204	11	113278	105506	94393.9	317094	469984	342933
ENSE00003701932	211114	1.85128	0.23462	7.89053	3.00896e-15	4.34451e-14	chr11	31793438	31793553	ENSG00000007372	ENST00000638853	PAX6	PAX6-241	10	113278	105506	94393.9	317094	469984	342933
ENSE00003701932	211114	1.85128	0.23462	7.89053	3.00896e-15	4.34451e-14	chr11	31793438	31793553	ENSG00000007372	ENST00000638965	PAX6	PAX6-246	5	113278	105506	94393.9	317094	469984	342933
ENSE00003701932	211114	1.85128	0.23462	7.89053	3.00896e-15	4.34451e-14	chr11	31793438	31793553	ENSG00000007372	ENST00000379107	PAX6	PAX6-202	11	113278	105506	94393.9	317094	469984	342933
ENSE00003701932	211114	1.85128	0.23462	7.89053	3.00896e-15	4.34451e-14	chr11	31793438	31793553	ENSG00000007372	ENST00000643871	PAX6	PAX6-282	11	113278	105506	94393.9	317094	469984	342933
ENSE00003701932	211114	1.85128	0.23462	7.89053	3.00896e-15	4.34451e-14	chr11	31793438	31793553	ENSG00000007372	ENST00000379132	PAX6	PAX6-208	10	113278	105506	94393.9	317094	469984	342933
ENSE00003701932	211114	1.85128	0.23462	7.89053	3.00896e-15	4.34451e-14	chr11	31793438	31793553	ENSG00000007372	ENST00000379123	PAX6	PAX6-206	12	113278	105506	94393.9	317094	469984	342933
ENSE00003701932	211114	1.85128	0.23462	7.89053	3.00896e-15	4.34451e-14	chr11	31793438	31793553	ENSG00000007372	ENST00000379109	PAX6	PAX6-203	10	113278	105506	94393.9	317094	469984	342933
ENSE00003701932	211114	1.85128	0.23462	7.89053	3.00896e-15	4.34451e-14	chr11	31793438	31793553	ENSG00000007372	ENST00000639916	PAX6	PAX6-258	10	113278	105506	94393.9	317094	469984	342933
ENSE00003701932	211114	1.85128	0.23462	7.89053	3.00896e-15	4.34451e-14	chr11	31793438	31793553	ENSG00000007372	ENST00000638914	PAX6	PAX6-244	12	113278	105506	94393.9	317094	469984	342933
ENSE00003701932	211114	1.85128	0.23462	7.89053	3.00896e-15	4.34451e-14	chr11	31793438	31793553	ENSG00000007372	ENST00000639950	PAX6	PAX6-261	11	113278	105506	94393.9	317094	469984	342933
ENSE00003701932	211114	1.85128	0.23462	7.89053	3.00896e-15	4.34451e-14	chr11	31793438	31793553	ENSG00000007372	ENST00000640766	PAX6	PAX6-277	9	113278	105506	94393.9	317094	469984	342933
ENSE00003701932	211114	1.85128	0.23462	7.89053	3.00896e-15	4.34451e-14	chr11	31793438	31793553	ENSG00000007372	ENST00000638346	PAX6	PAX6-234	8	113278	105506	94393.9	317094	469984	342933
ENSE00003701932	211114	1.85128	0.23462	7.89053	3.00896e-15	4.34451e-14	chr11	31793438	31793553	ENSG00000007372	ENST00000638250	PAX6	PAX6-232	9	113278	105506	94393.9	317094	469984	342933
ENSE00003701932	211114	1.85128	0.23462	7.89053	3.00896e-15	4.34451e-14	chr11	31793438	31793553	ENSG00000007372	ENST00000639109	PAX6	PAX6-252	7	113278	105506	94393.9	317094	469984	342933
ENSE00003701932	211114	1.85128	0.23462	7.89053	3.00896e-15	4.34451e-14	chr11	31793438	31793553	ENSG00000007372	ENST00000640610	PAX6	PAX6-272	11	113278	105506	94393.9	317094	469984	342933
ENSE00003701932	211114	1.85128	0.23462	7.89053	3.00896e-15	4.34451e-14	chr11	31793438	31793553	ENSG00000007372	ENST00000638878	PAX6	PAX6-242	8	113278	105506	94393.9	317094	469984	342933
ENSE00003701932	211114	1.85128	0.23462	7.89053	3.00896e-15	4.34451e-14	chr11	31793438	31793553	ENSG00000007372	ENST00000638802	PAX6	PAX6-240	9	113278	105506	94393.9	317094	469984	342933
ENSE00003701932	211114	1.85128	0.23462	7.89053	3.00896e-15	4.34451e-14	chr11	31793438	31793553	ENSG00000007372	ENST00000241001	PAX6	PAX6-201	11	113278	105506	94393.9	317094	469984	342933
ENSE00003701932	211114	1.85128	0.23462	7.89053	3.00896e-15	4.34451e-14	chr11	31793438	31793553	ENSG00000007372	ENST00000638629	PAX6	PAX6-235	8	113278	105506	94393.9	317094	469984	342933
ENSE00003701932	211114	1.85128	0.23462	7.89053	3.00896e-15	4.34451e-14	chr11	31793438	31793553	ENSG00000007372	ENST00000638963	PAX6	PAX6-245	8	113278	105506	94393.9	317094	469984	342933
ENSE00003701932	211114	1.85128	0.23462	7.89053	3.00896e-15	4.34451e-14	chr11	31793438	31793553	ENSG00000007372	ENST00000640872	PAX6	PAX6-279	7	113278	105506	94393.9	317094	469984	342933
ENSE00003701932	211114	1.85128	0.23462	7.89053	3.00896e-15	4.34451e-14	chr11	31793438	31793553	ENSG00000007372	ENST00000640287	PAX6	PAX6-267	8	113278	105506	94393.9	317094	469984	342933
ENSE00003701932	211114	1.85128	0.23462	7.89053	3.00896e-15	4.34451e-14	chr11	31793438	31793553	ENSG00000007372	ENST00000640975	PAX6	PAX6-281	12	113278	105506	94393.9	317094	469984	342933
ENSE00003701932	211114	1.85128	0.23462	7.89053	3.00896e-15	4.34451e-14	chr11	31793438	31793553	ENSG00000007372	ENST00000638696	PAX6	PAX6-237	9	113278	105506	94393.9	317094	469984	342933
ENSE00002147194	207852	1.84629	0.232904	7.92726	2.24033e-15	3.47885e-14	chr11	31793449	31793553	ENSG00000007372	ENST00000640242	PAX6	PAX6-265	8	111638	104247	93229.3	312675	460696	338128
ENSE00002182497	331851	1.58272	0.125668	12.5945	2.26367e-36	1.62e-34	chr11	31793652	31794788	ENSG00000007372	ENST00000471303	PAX6	PAX6-215	7	193016	186935	165524	502114	657499	474284
ENSE00002182497	331851	1.58272	0.125668	12.5945	2.26367e-36	1.62e-34	chr11	31793652	31794788	ENSG00000007372	ENST00000640735	PAX6	PAX6-276	3	193016	186935	165524	502114	657499	474284
ENSE00003697187	272973	1.60147	0.143252	11.1793	5.14705e-29	1.96084e-27	chr11	31793652	31793802	ENSG00000007372	ENST00000639409	PAX6	PAX6-256	11	158845	154956	134898	417246	551468	392877
ENSE00003697187	272973	1.60147	0.143252	11.1793	5.14705e-29	1.96084e-27	chr11	31793652	31793802	ENSG00000007372	ENST00000606377	PAX6	PAX6-231	10	158845	154956	134898	417246	551468	392877
ENSE00003697187	272973	1.60147	0.143252	11.1793	5.14705e-29	1.96084e-27	chr11	31793652	31793802	ENSG00000007372	ENST00000640125	PAX6	PAX6-263	7	158845	154956	134898	417246	551468	392877
ENSE00003697187	272973	1.60147	0.143252	11.1793	5.14705e-29	1.96084e-27	chr11	31793652	31793802	ENSG00000007372	ENST00000640460	PAX6	PAX6-271	9	158845	154956	134898	417246	551468	392877
ENSE00003697187	272973	1.60147	0.143252	11.1793	5.14705e-29	1.96084e-27	chr11	31793652	31793802	ENSG00000007372	ENST00000639943	PAX6	PAX6-260	10	158845	154956	134898	417246	551468	392877
ENSE00003697187	272973	1.60147	0.143252	11.1793	5.14705e-29	1.96084e-27	chr11	31793652	31793802	ENSG00000007372	ENST00000640242	PAX6	PAX6-265	7	158845	154956	134898	417246	551468	392877
ENSE00003697187	272973	1.60147	0.143252	11.1793	5.14705e-29	1.96084e-27	chr11	31793652	31793802	ENSG00000007372	ENST00000638755	PAX6	PAX6-238	7	158845	154956	134898	417246	551468	392877
ENSE00003697187	272973	1.60147	0.143252	11.1793	5.14705e-29	1.96084e-27	chr11	31793652	31793802	ENSG00000007372	ENST00000639548	PAX6	PAX6-257	8	158845	154956	134898	417246	551468	392877
ENSE00003697187	272973	1.60147	0.143252	11.1793	5.14705e-29	1.96084e-27	chr11	31793652	31793802	ENSG00000007372	ENST00000379129	PAX6	PAX6-207	10	158845	154956	134898	417246	551468	392877
ENSE00003697187	272973	1.60147	0.143252	11.1793	5.14705e-29	1.96084e-27	chr11	31793652	31793802	ENSG00000007372	ENST00000640431	PAX6	PAX6-270	11	158845	154956	134898	417246	551468	392877
ENSE00003697187	272973	1.60147	0.143252	11.1793	5.14705e-29	1.96084e-27	chr11	31793652	31793802	ENSG00000007372	ENST00000241001	PAX6	PAX6-201	10	158845	154956	134898	417246	551468	392877
ENSE00003697187	272973	1.60147	0.143252	11.1793	5.14705e-29	1.96084e-27	chr11	31793652	31793802	ENSG00000007372	ENST00000640963	PAX6	PAX6-280	9	158845	154956	134898	417246	551468	392877
ENSE00003697187	272973	1.60147	0.143252	11.1793	5.14705e-29	1.96084e-27	chr11	31793652	31793802	ENSG00000007372	ENST00000379115	PAX6	PAX6-205	11	158845	154956	134898	417246	551468	392877
ENSE00003697187	272973	1.60147	0.143252	11.1793	5.14705e-29	1.96084e-27	chr11	31793652	31793802	ENSG00000007372	ENST00000640287	PAX6	PAX6-267	7	158845	154956	134898	417246	551468	392877
ENSE00003697187	272973	1.60147	0.143252	11.1793	5.14705e-29	1.96084e-27	chr11	31793652	31793802	ENSG00000007372	ENST00000640613	PAX6	PAX6-273	10	158845	154956	134898	417246	551468	392877
ENSE00003697187	272973	1.60147	0.143252	11.1793	5.14705e-29	1.96084e-27	chr11	31793652	31793802	ENSG00000007372	ENST00000640368	PAX6	PAX6-269	11	158845	154956	134898	417246	551468	392877
ENSE00003697187	272973	1.60147	0.143252	11.1793	5.14705e-29	1.96084e-27	chr11	31793652	31793802	ENSG00000007372	ENST00000640684	PAX6	PAX6-275	10	158845	154956	134898	417246	551468	392877
ENSE00003697187	272973	1.60147	0.143252	11.1793	5.14705e-29	1.96084e-27	chr11	31793652	31793802	ENSG00000007372	ENST00000379111	PAX6	PAX6-204	10	158845	154956	134898	417246	551468	392877
ENSE00003697187	272973	1.60147	0.143252	11.1793	5.14705e-29	1.96084e-27	chr11	31793652	31793802	ENSG00000007372	ENST00000481563	PAX6	PAX6-217	8	158845	154956	134898	417246	551468	392877
ENSE00003697187	272973	1.60147	0.143252	11.1793	5.14705e-29	1.96084e-27	chr11	31793652	31793802	ENSG00000007372	ENST00000638762	PAX6	PAX6-239	7	158845	154956	134898	417246	551468	392877
ENSE00003697187	272973	1.60147	0.143252	11.1793	5.14705e-29	1.96084e-27	chr11	31793652	31793802	ENSG00000007372	ENST00000639061	PAX6	PAX6-250	7	158845	154956	134898	417246	551468	392877
ENSE00003697187	272973	1.60147	0.143252	11.1793	5.14705e-29	1.96084e-27	chr11	31793652	31793802	ENSG00000007372	ENST00000639034	PAX6	PAX6-248	10	158845	154956	134898	417246	551468	392877
ENSE00003697187	272973	1.60147	0.143252	11.1793	5.14705e-29	1.96084e-27	chr11	31793652	31793802	ENSG00000007372	ENST00000524853	PAX6	PAX6-219	10	158845	154956	134898	417246	551468	392877
ENSE00003697187	272973	1.60147	0.143252	11.1793	5.14705e-29	1.96084e-27	chr11	31793652	31793802	ENSG00000007372	ENST00000639006	PAX6	PAX6-247	9	158845	154956	134898	417246	551468	392877
ENSE00003697187	272973	1.60147	0.143252	11.1793	5.14705e-29	1.96084e-27	chr11	31793652	31793802	ENSG00000007372	ENST00000379123	PAX6	PAX6-206	11	158845	154956	134898	417246	551468	392877
ENSE00003697187	272973	1.60147	0.143252	11.1793	5.14705e-29	1.96084e-27	chr11	31793652	31793802	ENSG00000007372	ENST00000638853	PAX6	PAX6-241	9	158845	154956	134898	417246	551468	392877
ENSE00003697187	272973	1.60147	0.143252	11.1793	5.14705e-29	1.96084e-27	chr11	31793652	31793802	ENSG00000007372	ENST00000419022	PAX6	PAX6-209	11	158845	154956	134898	417246	551468	392877
ENSE00003697187	272973	1.60147	0.143252	11.1793	5.14705e-29	1.96084e-27	chr11	31793652	31793802	ENSG00000007372	ENST00000639386	PAX6	PAX6-254	7	158845	154956	134898	417246	551468	392877
ENSE00003697187	272973	1.60147	0.143252	11.1793	5.14705e-29	1.96084e-27	chr11	31793652	31793802	ENSG00000007372	ENST00000379107	PAX6	PAX6-202	10	158845	154956	134898	417246	551468	392877
ENSE00003697187	272973	1.60147	0.143252	11.1793	5.14705e-29	1.96084e-27	chr11	31793652	31793802	ENSG00000007372	ENST00000638802	PAX6	PAX6-240	8	158845	154956	134898	417246	551468	392877
ENSE00003697187	272973	1.60147	0.143252	11.1793	5.14705e-29	1.96084e-27	chr11	31793652	31793802	ENSG00000007372	ENST00000639916	PAX6	PAX6-258	9	158845	154956	134898	417246	551468	392877
ENSE00003697187	272973	1.60147	0.143252	11.1793	5.14705e-29	1.96084e-27	chr11	31793652	31793802	ENSG00000007372	ENST00000639079	PAX6	PAX6-251	6	158845	154956	134898	417246	551468	392877
ENSE00003697187	272973	1.60147	0.143252	11.1793	5.14705e-29	1.96084e-27	chr11	31793652	31793802	ENSG00000007372	ENST00000639950	PAX6	PAX6-261	10	158845	154956	134898	417246	551468	392877
ENSE00003697187	272973	1.60147	0.143252	11.1793	5.14705e-29	1.96084e-27	chr11	31793652	31793802	ENSG00000007372	ENST00000379109	PAX6	PAX6-203	9	158845	154956	134898	417246	551468	392877
ENSE00003697187	272973	1.60147	0.143252	11.1793	5.14705e-29	1.96084e-27	chr11	31793652	31793802	ENSG00000007372	ENST00000379132	PAX6	PAX6-208	9	158845	154956	134898	417246	551468	392877
ENSE00003697187	272973	1.60147	0.143252	11.1793	5.14705e-29	1.96084e-27	chr11	31793652	31793802	ENSG00000007372	ENST00000638965	PAX6	PAX6-246	4	158845	154956	134898	417246	551468	392877
ENSE00003697187	272973	1.60147	0.143252	11.1793	5.14705e-29	1.96084e-27	chr11	31793652	31793802	ENSG00000007372	ENST00000638914	PAX6	PAX6-244	11	158845	154956	134898	417246	551468	392877
ENSE00003697187	272973	1.60147	0.143252	11.1793	5.14705e-29	1.96084e-27	chr11	31793652	31793802	ENSG00000007372	ENST00000643871	PAX6	PAX6-282	10	158845	154956	134898	417246	551468	392877
ENSE00003697187	272973	1.60147	0.143252	11.1793	5.14705e-29	1.96084e-27	chr11	31793652	31793802	ENSG00000007372	ENST00000640766	PAX6	PAX6-277	8	158845	154956	134898	417246	551468	392877
ENSE00003697187	272973	1.60147	0.143252	11.1793	5.14705e-29	1.96084e-27	chr11	31793652	31793802	ENSG00000007372	ENST00000638685	PAX6	PAX6-236	6	158845	154956	134898	417246	551468	392877
ENSE00003697187	272973	1.60147	0.143252	11.1793	5.14705e-29	1.96084e-27	chr11	31793652	31793802	ENSG00000007372	ENST00000640335	PAX6	PAX6-268	6	158845	154956	134898	417246	551468	392877
ENSE00003697187	272973	1.60147	0.143252	11.1793	5.14705e-29	1.96084e-27	chr11	31793652	31793802	ENSG00000007372	ENST00000640610	PAX6	PAX6-272	10	158845	154956	134898	417246	551468	392877
ENSE00003697187	272973	1.60147	0.143252	11.1793	5.14705e-29	1.96084e-27	chr11	31793652	31793802	ENSG00000007372	ENST00000638696	PAX6	PAX6-237	8	158845	154956	134898	417246	551468	392877
ENSE00003697187	272973	1.60147	0.143252	11.1793	5.14705e-29	1.96084e-27	chr11	31793652	31793802	ENSG00000007372	ENST00000423822	PAX6	PAX6-210	11	158845	154956	134898	417246	551468	392877
ENSE00003697187	272973	1.60147	0.143252	11.1793	5.14705e-29	1.96084e-27	chr11	31793652	31793802	ENSG00000007372	ENST00000638250	PAX6	PAX6-232	8	158845	154956	134898	417246	551468	392877
ENSE00003697187	272973	1.60147	0.143252	11.1793	5.14705e-29	1.96084e-27	chr11	31793652	31793802	ENSG00000007372	ENST00000438681	PAX6	PAX6-211	11	158845	154956	134898	417246	551468	392877
ENSE00003697187	272973	1.60147	0.143252	11.1793	5.14705e-29	1.96084e-27	chr11	31793652	31793802	ENSG00000007372	ENST00000640975	PAX6	PAX6-281	11	158845	154956	134898	417246	551468	392877
ENSE00003697187	272973	1.60147	0.143252	11.1793	5.14705e-29	1.96084e-27	chr11	31793652	31793802	ENSG00000007372	ENST00000638629	PAX6	PAX6-235	7	158845	154956	134898	417246	551468	392877
ENSE00003697187	272973	1.60147	0.143252	11.1793	5.14705e-29	1.96084e-27	chr11	31793652	31793802	ENSG00000007372	ENST00000640872	PAX6	PAX6-279	6	158845	154956	134898	417246	551468	392877
ENSE00003697187	272973	1.60147	0.143252	11.1793	5.14705e-29	1.96084e-27	chr11	31793652	31793802	ENSG00000007372	ENST00000639109	PAX6	PAX6-252	6	158845	154956	134898	417246	551468	392877
ENSE00003697187	272973	1.60147	0.143252	11.1793	5.14705e-29	1.96084e-27	chr11	31793652	31793802	ENSG00000007372	ENST00000638963	PAX6	PAX6-245	7	158845	154956	134898	417246	551468	392877
ENSE00003697187	272973	1.60147	0.143252	11.1793	5.14705e-29	1.96084e-27	chr11	31793652	31793802	ENSG00000007372	ENST00000638878	PAX6	PAX6-242	7	158845	154956	134898	417246	551468	392877
ENSE00003697187	272973	1.60147	0.143252	11.1793	5.14705e-29	1.96084e-27	chr11	31793652	31793802	ENSG00000007372	ENST00000638346	PAX6	PAX6-234	7	158845	154956	134898	417246	551468	392877
ENSE00003697229	272973	1.60147	0.143252	11.1793	5.14705e-29	1.96084e-27	chr11	31793652	31793802	ENSG00000007372	ENST00000640038	PAX6	PAX6-262	2	158845	154956	134898	417246	551468	392877
ENSE00003697229	272973	1.60147	0.143252	11.1793	5.14705e-29	1.96084e-27	chr11	31793652	31793802	ENSG00000007372	ENST00000470027	PAX6	PAX6-214	5	158845	154956	134898	417246	551468	392877
ENSE00003697229	272973	1.60147	0.143252	11.1793	5.14705e-29	1.96084e-27	chr11	31793652	31793802	ENSG00000007372	ENST00000640172	PAX6	PAX6-264	10	158845	154956	134898	417246	551468	392877
ENSE00003697229	272973	1.60147	0.143252	11.1793	5.14705e-29	1.96084e-27	chr11	31793652	31793802	ENSG00000007372	ENST00000639054	PAX6	PAX6-249	8	158845	154956	134898	417246	551468	392877
ENSE00003697229	272973	1.60147	0.143252	11.1793	5.14705e-29	1.96084e-27	chr11	31793652	31793802	ENSG00000007372	ENST00000533333	PAX6	PAX6-228	8	158845	154956	134898	417246	551468	392877
ENSE00003697229	272973	1.60147	0.143252	11.1793	5.14705e-29	1.96084e-27	chr11	31793652	31793802	ENSG00000007372	ENST00000532916	PAX6	PAX6-226	2	158845	154956	134898	417246	551468	392877
ENSE00003697229	272973	1.60147	0.143252	11.1793	5.14705e-29	1.96084e-27	chr11	31793652	31793802	ENSG00000007372	ENST00000639394	PAX6	PAX6-255	10	158845	154956	134898	417246	551468	392877
ENSE00003697229	272973	1.60147	0.143252	11.1793	5.14705e-29	1.96084e-27	chr11	31793652	31793802	ENSG00000007372	ENST00000494377	PAX6	PAX6-218	5	158845	154956	134898	417246	551468	392877
ENSE00003697229	272973	1.60147	0.143252	11.1793	5.14705e-29	1.96084e-27	chr11	31793652	31793802	ENSG00000007372	ENST00000530373	PAX6	PAX6-222	4	158845	154956	134898	417246	551468	392877
ENSE00003697229	272973	1.60147	0.143252	11.1793	5.14705e-29	1.96084e-27	chr11	31793652	31793802	ENSG00000007372	ENST00000464174	PAX6	PAX6-213	4	158845	154956	134898	417246	551468	392877
ENSE00003697229	272973	1.60147	0.143252	11.1793	5.14705e-29	1.96084e-27	chr11	31793652	31793802	ENSG00000007372	ENST00000531910	PAX6	PAX6-224	5	158845	154956	134898	417246	551468	392877
ENSE00003697229	272973	1.60147	0.143252	11.1793	5.14705e-29	1.96084e-27	chr11	31793652	31793802	ENSG00000007372	ENST00000638913	PAX6	PAX6-243	9	158845	154956	134898	417246	551468	392877
ENSE00003697229	272973	1.60147	0.143252	11.1793	5.14705e-29	1.96084e-27	chr11	31793652	31793802	ENSG00000007372	ENST00000474783	PAX6	PAX6-216	10	158845	154956	134898	417246	551468	392877
ENSE00001811447	158918	1.40008	0.159451	8.78063	1.62558e-18	3.56762e-17	chr11	31794032	31794323	ENSG00000007372	ENST00000640038	PAX6	PAX6-262	1	102497	102716	88734.9	255210	305827	214749
ENSE00002163231	158885	1.40007	0.15961	8.77183	1.75783e-18	3.80709e-17	chr11	31794032	31794126	ENSG00000007372	ENST00000532916	PAX6	PAX6-226	1	102487	102706	88729	255196	305792	214719
ENSE00003696657	158859	1.39991	0.159671	8.76748	1.82717e-18	3.8558e-17	chr11	31794032	31794114	ENSG00000007372	ENST00000640963	PAX6	PAX6-280	8	102482	102705	88725.5	255112	305792	214693
ENSE00003696657	158859	1.39991	0.159671	8.76748	1.82717e-18	3.8558e-17	chr11	31794032	31794114	ENSG00000007372	ENST00000640242	PAX6	PAX6-265	6	102482	102705	88725.5	255112	305792	214693
ENSE00003696657	158859	1.39991	0.159671	8.76748	1.82717e-18	3.8558e-17	chr11	31794032	31794114	ENSG00000007372	ENST00000640125	PAX6	PAX6-263	6	102482	102705	88725.5	255112	305792	214693
ENSE00003696657	158859	1.39991	0.159671	8.76748	1.82717e-18	3.8558e-17	chr11	31794032	31794114	ENSG00000007372	ENST00000639943	PAX6	PAX6-260	9	102482	102705	88725.5	255112	305792	214693
ENSE00003696657	158859	1.39991	0.159671	8.76748	1.82717e-18	3.8558e-17	chr11	31794032	31794114	ENSG00000007372	ENST00000639548	PAX6	PAX6-257	7	102482	102705	88725.5	255112	305792	214693
ENSE00003696657	158859	1.39991	0.159671	8.76748	1.82717e-18	3.8558e-17	chr11	31794032	31794114	ENSG00000007372	ENST00000639409	PAX6	PAX6-256	10	102482	102705	88725.5	255112	305792	214693
ENSE00003696657	158859	1.39991	0.159671	8.76748	1.82717e-18	3.8558e-17	chr11	31794032	31794114	ENSG00000007372	ENST00000241001	PAX6	PAX6-201	9	102482	102705	88725.5	255112	305792	214693
ENSE00003696657	158859	1.39991	0.159671	8.76748	1.82717e-18	3.8558e-17	chr11	31794032	31794114	ENSG00000007372	ENST00000606377	PAX6	PAX6-231	9	102482	102705	88725.5	255112	305792	214693
ENSE00003696657	158859	1.39991	0.159671	8.76748	1.82717e-18	3.8558e-17	chr11	31794032	31794114	ENSG00000007372	ENST00000640460	PAX6	PAX6-271	8	102482	102705	88725.5	255112	305792	214693
ENSE00003696657	158859	1.39991	0.159671	8.76748	1.82717e-18	3.8558e-17	chr11	31794032	31794114	ENSG00000007372	ENST00000639386	PAX6	PAX6-254	6	102482	102705	88725.5	255112	305792	214693
ENSE00003696657	158859	1.39991	0.159671	8.76748	1.82717e-18	3.8558e-17	chr11	31794032	31794114	ENSG00000007372	ENST00000638755	PAX6	PAX6-238	6	102482	102705	88725.5	255112	305792	214693
ENSE00003696657	158859	1.39991	0.159671	8.76748	1.82717e-18	3.8558e-17	chr11	31794032	31794114	ENSG00000007372	ENST00000640684	PAX6	PAX6-275	9	102482	102705	88725.5	255112	305792	214693
ENSE00003696657	158859	1.39991	0.159671	8.76748	1.82717e-18	3.8558e-17	chr11	31794032	31794114	ENSG00000007372	ENST00000640368	PAX6	PAX6-269	10	102482	102705	88725.5	255112	305792	214693
ENSE00003696657	158859	1.39991	0.159671	8.76748	1.82717e-18	3.8558e-17	chr11	31794032	31794114	ENSG00000007372	ENST00000639079	PAX6	PAX6-251	5	102482	102705	88725.5	255112	305792	214693
ENSE00003696657	158859	1.39991	0.159671	8.76748	1.82717e-18	3.8558e-17	chr11	31794032	31794114	ENSG00000007372	ENST00000639061	PAX6	PAX6-250	6	102482	102705	88725.5	255112	305792	214693
ENSE00003696657	158859	1.39991	0.159671	8.76748	1.82717e-18	3.8558e-17	chr11	31794032	31794114	ENSG00000007372	ENST00000423822	PAX6	PAX6-210	10	102482	102705	88725.5	255112	305792	214693
ENSE00003696657	158859	1.39991	0.159671	8.76748	1.82717e-18	3.8558e-17	chr11	31794032	31794114	ENSG00000007372	ENST00000638762	PAX6	PAX6-239	6	102482	102705	88725.5	255112	305792	214693
ENSE00003696657	158859	1.39991	0.159671	8.76748	1.82717e-18	3.8558e-17	chr11	31794032	31794114	ENSG00000007372	ENST00000524853	PAX6	PAX6-219	9	102482	102705	88725.5	255112	305792	214693
ENSE00003696657	158859	1.39991	0.159671	8.76748	1.82717e-18	3.8558e-17	chr11	31794032	31794114	ENSG00000007372	ENST00000638853	PAX6	PAX6-241	8	102482	102705	88725.5	255112	305792	214693
ENSE00003696657	158859	1.39991	0.159671	8.76748	1.82717e-18	3.8558e-17	chr11	31794032	31794114	ENSG00000007372	ENST00000639006	PAX6	PAX6-247	8	102482	102705	88725.5	255112	305792	214693
ENSE00003696657	158859	1.39991	0.159671	8.76748	1.82717e-18	3.8558e-17	chr11	31794032	31794114	ENSG00000007372	ENST00000639034	PAX6	PAX6-248	9	102482	102705	88725.5	255112	305792	214693
ENSE00003696657	158859	1.39991	0.159671	8.76748	1.82717e-18	3.8558e-17	chr11	31794032	31794114	ENSG00000007372	ENST00000379115	PAX6	PAX6-205	10	102482	102705	88725.5	255112	305792	214693
ENSE00003696657	158859	1.39991	0.159671	8.76748	1.82717e-18	3.8558e-17	chr11	31794032	31794114	ENSG00000007372	ENST00000640287	PAX6	PAX6-267	6	102482	102705	88725.5	255112	305792	214693
ENSE00003696657	158859	1.39991	0.159671	8.76748	1.82717e-18	3.8558e-17	chr11	31794032	31794114	ENSG00000007372	ENST00000640431	PAX6	PAX6-270	10	102482	102705	88725.5	255112	305792	214693
ENSE00003696657	158859	1.39991	0.159671	8.76748	1.82717e-18	3.8558e-17	chr11	31794032	31794114	ENSG00000007372	ENST00000638685	PAX6	PAX6-236	5	102482	102705	88725.5	255112	305792	214693
ENSE00003696657	158859	1.39991	0.159671	8.76748	1.82717e-18	3.8558e-17	chr11	31794032	31794114	ENSG00000007372	ENST00000481563	PAX6	PAX6-217	7	102482	102705	88725.5	255112	305792	214693
ENSE00003696657	158859	1.39991	0.159671	8.76748	1.82717e-18	3.8558e-17	chr11	31794032	31794114	ENSG00000007372	ENST00000638965	PAX6	PAX6-246	3	102482	102705	88725.5	255112	305792	214693
ENSE00003696657	158859	1.39991	0.159671	8.76748	1.82717e-18	3.8558e-17	chr11	31794032	31794114	ENSG00000007372	ENST00000379111	PAX6	PAX6-204	9	102482	102705	88725.5	255112	305792	214693
ENSE00003696657	158859	1.39991	0.159671	8.76748	1.82717e-18	3.8558e-17	chr11	31794032	31794114	ENSG00000007372	ENST00000639950	PAX6	PAX6-261	9	102482	102705	88725.5	255112	305792	214693
ENSE00003696657	158859	1.39991	0.159671	8.76748	1.82717e-18	3.8558e-17	chr11	31794032	31794114	ENSG00000007372	ENST00000640335	PAX6	PAX6-268	5	102482	102705	88725.5	255112	305792	214693
ENSE00003696657	158859	1.39991	0.159671	8.76748	1.82717e-18	3.8558e-17	chr11	31794032	31794114	ENSG00000007372	ENST00000638914	PAX6	PAX6-244	10	102482	102705	88725.5	255112	305792	214693
ENSE00003696657	158859	1.39991	0.159671	8.76748	1.82717e-18	3.8558e-17	chr11	31794032	31794114	ENSG00000007372	ENST00000379132	PAX6	PAX6-208	8	102482	102705	88725.5	255112	305792	214693
ENSE00003696657	158859	1.39991	0.159671	8.76748	1.82717e-18	3.8558e-17	chr11	31794032	31794114	ENSG00000007372	ENST00000379109	PAX6	PAX6-203	8	102482	102705	88725.5	255112	305792	214693
ENSE00003696657	158859	1.39991	0.159671	8.76748	1.82717e-18	3.8558e-17	chr11	31794032	31794114	ENSG00000007372	ENST00000640613	PAX6	PAX6-273	9	102482	102705	88725.5	255112	305792	214693
ENSE00003696657	158859	1.39991	0.159671	8.76748	1.82717e-18	3.8558e-17	chr11	31794032	31794114	ENSG00000007372	ENST00000379129	PAX6	PAX6-207	9	102482	102705	88725.5	255112	305792	214693
ENSE00003696657	158859	1.39991	0.159671	8.76748	1.82717e-18	3.8558e-17	chr11	31794032	31794114	ENSG00000007372	ENST00000639916	PAX6	PAX6-258	8	102482	102705	88725.5	255112	305792	214693
ENSE00003696657	158859	1.39991	0.159671	8.76748	1.82717e-18	3.8558e-17	chr11	31794032	31794114	ENSG00000007372	ENST00000379107	PAX6	PAX6-202	9	102482	102705	88725.5	255112	305792	214693
ENSE00003696657	158859	1.39991	0.159671	8.76748	1.82717e-18	3.8558e-17	chr11	31794032	31794114	ENSG00000007372	ENST00000638802	PAX6	PAX6-240	7	102482	102705	88725.5	255112	305792	214693
ENSE00003696657	158859	1.39991	0.159671	8.76748	1.82717e-18	3.8558e-17	chr11	31794032	31794114	ENSG00000007372	ENST00000379123	PAX6	PAX6-206	10	102482	102705	88725.5	255112	305792	214693
ENSE00003696657	158859	1.39991	0.159671	8.76748	1.82717e-18	3.8558e-17	chr11	31794032	31794114	ENSG00000007372	ENST00000438681	PAX6	PAX6-211	10	102482	102705	88725.5	255112	305792	214693
ENSE00003696657	158859	1.39991	0.159671	8.76748	1.82717e-18	3.8558e-17	chr11	31794032	31794114	ENSG00000007372	ENST00000640610	PAX6	PAX6-272	9	102482	102705	88725.5	255112	305792	214693
ENSE00003696657	158859	1.39991	0.159671	8.76748	1.82717e-18	3.8558e-17	chr11	31794032	31794114	ENSG00000007372	ENST00000640975	PAX6	PAX6-281	10	102482	102705	88725.5	255112	305792	214693
ENSE00003696657	158859	1.39991	0.159671	8.76748	1.82717e-18	3.8558e-17	chr11	31794032	31794114	ENSG00000007372	ENST00000638696	PAX6	PAX6-237	7	102482	102705	88725.5	255112	305792	214693
ENSE00003696657	158859	1.39991	0.159671	8.76748	1.82717e-18	3.8558e-17	chr11	31794032	31794114	ENSG00000007372	ENST00000640766	PAX6	PAX6-277	7	102482	102705	88725.5	255112	305792	214693
ENSE00003696657	158859	1.39991	0.159671	8.76748	1.82717e-18	3.8558e-17	chr11	31794032	31794114	ENSG00000007372	ENST00000638878	PAX6	PAX6-242	6	102482	102705	88725.5	255112	305792	214693
ENSE00003696657	158859	1.39991	0.159671	8.76748	1.82717e-18	3.8558e-17	chr11	31794032	31794114	ENSG00000007372	ENST00000419022	PAX6	PAX6-209	10	102482	102705	88725.5	255112	305792	214693
ENSE00003696657	158859	1.39991	0.159671	8.76748	1.82717e-18	3.8558e-17	chr11	31794032	31794114	ENSG00000007372	ENST00000640872	PAX6	PAX6-279	5	102482	102705	88725.5	255112	305792	214693
ENSE00003696657	158859	1.39991	0.159671	8.76748	1.82717e-18	3.8558e-17	chr11	31794032	31794114	ENSG00000007372	ENST00000639109	PAX6	PAX6-252	5	102482	102705	88725.5	255112	305792	214693
ENSE00003696657	158859	1.39991	0.159671	8.76748	1.82717e-18	3.8558e-17	chr11	31794032	31794114	ENSG00000007372	ENST00000638250	PAX6	PAX6-232	7	102482	102705	88725.5	255112	305792	214693
ENSE00003696657	158859	1.39991	0.159671	8.76748	1.82717e-18	3.8558e-17	chr11	31794032	31794114	ENSG00000007372	ENST00000638629	PAX6	PAX6-235	6	102482	102705	88725.5	255112	305792	214693
ENSE00003696657	158859	1.39991	0.159671	8.76748	1.82717e-18	3.8558e-17	chr11	31794032	31794114	ENSG00000007372	ENST00000643871	PAX6	PAX6-282	9	102482	102705	88725.5	255112	305792	214693
ENSE00003696657	158859	1.39991	0.159671	8.76748	1.82717e-18	3.8558e-17	chr11	31794032	31794114	ENSG00000007372	ENST00000638963	PAX6	PAX6-245	6	102482	102705	88725.5	255112	305792	214693
ENSE00003696657	158859	1.39991	0.159671	8.76748	1.82717e-18	3.8558e-17	chr11	31794032	31794114	ENSG00000007372	ENST00000638346	PAX6	PAX6-234	6	102482	102705	88725.5	255112	305792	214693
ENSE00003702124	158859	1.39991	0.159671	8.76748	1.82717e-18	3.8558e-17	chr11	31794032	31794114	ENSG00000007372	ENST00000640172	PAX6	PAX6-264	9	102482	102705	88725.5	255112	305792	214693
ENSE00003702124	158859	1.39991	0.159671	8.76748	1.82717e-18	3.8558e-17	chr11	31794032	31794114	ENSG00000007372	ENST00000464174	PAX6	PAX6-213	3	102482	102705	88725.5	255112	305792	214693
ENSE00003702124	158859	1.39991	0.159671	8.76748	1.82717e-18	3.8558e-17	chr11	31794032	31794114	ENSG00000007372	ENST00000639394	PAX6	PAX6-255	9	102482	102705	88725.5	255112	305792	214693
ENSE00003702124	158859	1.39991	0.159671	8.76748	1.82717e-18	3.8558e-17	chr11	31794032	31794114	ENSG00000007372	ENST00000530373	PAX6	PAX6-222	3	102482	102705	88725.5	255112	305792	214693
ENSE00003702124	158859	1.39991	0.159671	8.76748	1.82717e-18	3.8558e-17	chr11	31794032	31794114	ENSG00000007372	ENST00000470027	PAX6	PAX6-214	4	102482	102705	88725.5	255112	305792	214693
ENSE00003702124	158859	1.39991	0.159671	8.76748	1.82717e-18	3.8558e-17	chr11	31794032	31794114	ENSG00000007372	ENST00000639054	PAX6	PAX6-249	7	102482	102705	88725.5	255112	305792	214693
ENSE00003702124	158859	1.39991	0.159671	8.76748	1.82717e-18	3.8558e-17	chr11	31794032	31794114	ENSG00000007372	ENST00000474783	PAX6	PAX6-216	9	102482	102705	88725.5	255112	305792	214693
ENSE00003702124	158859	1.39991	0.159671	8.76748	1.82717e-18	3.8558e-17	chr11	31794032	31794114	ENSG00000007372	ENST00000533333	PAX6	PAX6-228	7	102482	102705	88725.5	255112	305792	214693
ENSE00003702124	158859	1.39991	0.159671	8.76748	1.82717e-18	3.8558e-17	chr11	31794032	31794114	ENSG00000007372	ENST00000638913	PAX6	PAX6-243	8	102482	102705	88725.5	255112	305792	214693
ENSE00003702124	158859	1.39991	0.159671	8.76748	1.82717e-18	3.8558e-17	chr11	31794032	31794114	ENSG00000007372	ENST00000531910	PAX6	PAX6-224	4	102482	102705	88725.5	255112	305792	214693
ENSE00003702124	158859	1.39991	0.159671	8.76748	1.82717e-18	3.8558e-17	chr11	31794032	31794114	ENSG00000007372	ENST00000494377	PAX6	PAX6-218	4	102482	102705	88725.5	255112	305792	214693
ENSE00003697836	105502	1.35455	0.111627	12.1346	6.92129e-34	3.92843e-32	chr11	31794630	31794788	ENSG00000007372	ENST00000639394	PAX6	PAX6-255	8	69648.4	69624.9	61299.6	171632	189377	151901
ENSE00003697836	105502	1.35455	0.111627	12.1346	6.92129e-34	3.92843e-32	chr11	31794630	31794788	ENSG00000007372	ENST00000638913	PAX6	PAX6-243	7	69648.4	69624.9	61299.6	171632	189377	151901
ENSE00003697836	105502	1.35455	0.111627	12.1346	6.92129e-34	3.92843e-32	chr11	31794630	31794788	ENSG00000007372	ENST00000533333	PAX6	PAX6-228	6	69648.4	69624.9	61299.6	171632	189377	151901
ENSE00003697836	105502	1.35455	0.111627	12.1346	6.92129e-34	3.92843e-32	chr11	31794630	31794788	ENSG00000007372	ENST00000640172	PAX6	PAX6-264	8	69648.4	69624.9	61299.6	171632	189377	151901
ENSE00003697836	105502	1.35455	0.111627	12.1346	6.92129e-34	3.92843e-32	chr11	31794630	31794788	ENSG00000007372	ENST00000464174	PAX6	PAX6-213	2	69648.4	69624.9	61299.6	171632	189377	151901
ENSE00003697836	105502	1.35455	0.111627	12.1346	6.92129e-34	3.92843e-32	chr11	31794630	31794788	ENSG00000007372	ENST00000494377	PAX6	PAX6-218	3	69648.4	69624.9	61299.6	171632	189377	151901
ENSE00003697836	105502	1.35455	0.111627	12.1346	6.92129e-34	3.92843e-32	chr11	31794630	31794788	ENSG00000007372	ENST00000470027	PAX6	PAX6-214	3	69648.4	69624.9	61299.6	171632	189377	151901
ENSE00003697836	105502	1.35455	0.111627	12.1346	6.92129e-34	3.92843e-32	chr11	31794630	31794788	ENSG00000007372	ENST00000531910	PAX6	PAX6-224	3	69648.4	69624.9	61299.6	171632	189377	151901
ENSE00003697836	105502	1.35455	0.111627	12.1346	6.92129e-34	3.92843e-32	chr11	31794630	31794788	ENSG00000007372	ENST00000639054	PAX6	PAX6-249	6	69648.4	69624.9	61299.6	171632	189377	151901
ENSE00003697836	105502	1.35455	0.111627	12.1346	6.92129e-34	3.92843e-32	chr11	31794630	31794788	ENSG00000007372	ENST00000474783	PAX6	PAX6-216	8	69648.4	69624.9	61299.6	171632	189377	151901
ENSE00003697836	105502	1.35455	0.111627	12.1346	6.92129e-34	3.92843e-32	chr11	31794630	31794788	ENSG00000007372	ENST00000530373	PAX6	PAX6-222	2	69648.4	69624.9	61299.6	171632	189377	151901
ENSE00003698739	105502	1.35455	0.111627	12.1346	6.92129e-34	3.92843e-32	chr11	31794630	31794788	ENSG00000007372	ENST00000640460	PAX6	PAX6-271	7	69648.4	69624.9	61299.6	171632	189377	151901
ENSE00003698739	105502	1.35455	0.111627	12.1346	6.92129e-34	3.92843e-32	chr11	31794630	31794788	ENSG00000007372	ENST00000640963	PAX6	PAX6-280	7	69648.4	69624.9	61299.6	171632	189377	151901
ENSE00003698739	105502	1.35455	0.111627	12.1346	6.92129e-34	3.92843e-32	chr11	31794630	31794788	ENSG00000007372	ENST00000379109	PAX6	PAX6-203	7	69648.4	69624.9	61299.6	171632	189377	151901
ENSE00003698739	105502	1.35455	0.111627	12.1346	6.92129e-34	3.92843e-32	chr11	31794630	31794788	ENSG00000007372	ENST00000606377	PAX6	PAX6-231	8	69648.4	69624.9	61299.6	171632	189377	151901
ENSE00003698739	105502	1.35455	0.111627	12.1346	6.92129e-34	3.92843e-32	chr11	31794630	31794788	ENSG00000007372	ENST00000640242	PAX6	PAX6-265	5	69648.4	69624.9	61299.6	171632	189377	151901
ENSE00003698739	105502	1.35455	0.111627	12.1346	6.92129e-34	3.92843e-32	chr11	31794630	31794788	ENSG00000007372	ENST00000638755	PAX6	PAX6-238	5	69648.4	69624.9	61299.6	171632	189377	151901
ENSE00003698739	105502	1.35455	0.111627	12.1346	6.92129e-34	3.92843e-32	chr11	31794630	31794788	ENSG00000007372	ENST00000640368	PAX6	PAX6-269	9	69648.4	69624.9	61299.6	171632	189377	151901
ENSE00003698739	105502	1.35455	0.111627	12.1346	6.92129e-34	3.92843e-32	chr11	31794630	31794788	ENSG00000007372	ENST00000639386	PAX6	PAX6-254	5	69648.4	69624.9	61299.6	171632	189377	151901
ENSE00003698739	105502	1.35455	0.111627	12.1346	6.92129e-34	3.92843e-32	chr11	31794630	31794788	ENSG00000007372	ENST00000639548	PAX6	PAX6-257	6	69648.4	69624.9	61299.6	171632	189377	151901
ENSE00003698739	105502	1.35455	0.111627	12.1346	6.92129e-34	3.92843e-32	chr11	31794630	31794788	ENSG00000007372	ENST00000640287	PAX6	PAX6-267	5	69648.4	69624.9	61299.6	171632	189377	151901
ENSE00003698739	105502	1.35455	0.111627	12.1346	6.92129e-34	3.92843e-32	chr11	31794630	31794788	ENSG00000007372	ENST00000241001	PAX6	PAX6-201	8	69648.4	69624.9	61299.6	171632	189377	151901
ENSE00003698739	105502	1.35455	0.111627	12.1346	6.92129e-34	3.92843e-32	chr11	31794630	31794788	ENSG00000007372	ENST00000640125	PAX6	PAX6-263	5	69648.4	69624.9	61299.6	171632	189377	151901
ENSE00003698739	105502	1.35455	0.111627	12.1346	6.92129e-34	3.92843e-32	chr11	31794630	31794788	ENSG00000007372	ENST00000639079	PAX6	PAX6-251	4	69648.4	69624.9	61299.6	171632	189377	151901
ENSE00003698739	105502	1.35455	0.111627	12.1346	6.92129e-34	3.92843e-32	chr11	31794630	31794788	ENSG00000007372	ENST00000638878	PAX6	PAX6-242	5	69648.4	69624.9	61299.6	171632	189377	151901
ENSE00003698739	105502	1.35455	0.111627	12.1346	6.92129e-34	3.92843e-32	chr11	31794630	31794788	ENSG00000007372	ENST00000639943	PAX6	PAX6-260	8	69648.4	69624.9	61299.6	171632	189377	151901
ENSE00003698739	105502	1.35455	0.111627	12.1346	6.92129e-34	3.92843e-32	chr11	31794630	31794788	ENSG00000007372	ENST00000639109	PAX6	PAX6-252	4	69648.4	69624.9	61299.6	171632	189377	151901
ENSE00003698739	105502	1.35455	0.111627	12.1346	6.92129e-34	3.92843e-32	chr11	31794630	31794788	ENSG00000007372	ENST00000638762	PAX6	PAX6-239	5	69648.4	69624.9	61299.6	171632	189377	151901
ENSE00003698739	105502	1.35455	0.111627	12.1346	6.92129e-34	3.92843e-32	chr11	31794630	31794788	ENSG00000007372	ENST00000640610	PAX6	PAX6-272	8	69648.4	69624.9	61299.6	171632	189377	151901
ENSE00003698739	105502	1.35455	0.111627	12.1346	6.92129e-34	3.92843e-32	chr11	31794630	31794788	ENSG00000007372	ENST00000379115	PAX6	PAX6-205	9	69648.4	69624.9	61299.6	171632	189377	151901
ENSE00003698739	105502	1.35455	0.111627	12.1346	6.92129e-34	3.92843e-32	chr11	31794630	31794788	ENSG00000007372	ENST00000640684	PAX6	PAX6-275	8	69648.4	69624.9	61299.6	171632	189377	151901
ENSE00003698739	105502	1.35455	0.111627	12.1346	6.92129e-34	3.92843e-32	chr11	31794630	31794788	ENSG00000007372	ENST00000640335	PAX6	PAX6-268	4	69648.4	69624.9	61299.6	171632	189377	151901
ENSE00003698739	105502	1.35455	0.111627	12.1346	6.92129e-34	3.92843e-32	chr11	31794630	31794788	ENSG00000007372	ENST00000638853	PAX6	PAX6-241	7	69648.4	69624.9	61299.6	171632	189377	151901
ENSE00003698739	105502	1.35455	0.111627	12.1346	6.92129e-34	3.92843e-32	chr11	31794630	31794788	ENSG00000007372	ENST00000640431	PAX6	PAX6-270	9	69648.4	69624.9	61299.6	171632	189377	151901
ENSE00003698739	105502	1.35455	0.111627	12.1346	6.92129e-34	3.92843e-32	chr11	31794630	31794788	ENSG00000007372	ENST00000640613	PAX6	PAX6-273	8	69648.4	69624.9	61299.6	171632	189377	151901
ENSE00003698739	105502	1.35455	0.111627	12.1346	6.92129e-34	3.92843e-32	chr11	31794630	31794788	ENSG00000007372	ENST00000638914	PAX6	PAX6-244	9	69648.4	69624.9	61299.6	171632	189377	151901
ENSE00003698739	105502	1.35455	0.111627	12.1346	6.92129e-34	3.92843e-32	chr11	31794630	31794788	ENSG00000007372	ENST00000639409	PAX6	PAX6-256	9	69648.4	69624.9	61299.6	171632	189377	151901
ENSE00003698739	105502	1.35455	0.111627	12.1346	6.92129e-34	3.92843e-32	chr11	31794630	31794788	ENSG00000007372	ENST00000481563	PAX6	PAX6-217	6	69648.4	69624.9	61299.6	171632	189377	151901
ENSE00003698739	105502	1.35455	0.111627	12.1346	6.92129e-34	3.92843e-32	chr11	31794630	31794788	ENSG00000007372	ENST00000379129	PAX6	PAX6-207	8	69648.4	69624.9	61299.6	171632	189377	151901
ENSE00003698739	105502	1.35455	0.111627	12.1346	6.92129e-34	3.92843e-32	chr11	31794630	31794788	ENSG00000007372	ENST00000638685	PAX6	PAX6-236	4	69648.4	69624.9	61299.6	171632	189377	151901
ENSE00003698739	105502	1.35455	0.111627	12.1346	6.92129e-34	3.92843e-32	chr11	31794630	31794788	ENSG00000007372	ENST00000423822	PAX6	PAX6-210	9	69648.4	69624.9	61299.6	171632	189377	151901
ENSE00003698739	105502	1.35455	0.111627	12.1346	6.92129e-34	3.92843e-32	chr11	31794630	31794788	ENSG00000007372	ENST00000638250	PAX6	PAX6-232	6	69648.4	69624.9	61299.6	171632	189377	151901
ENSE00003698739	105502	1.35455	0.111627	12.1346	6.92129e-34	3.92843e-32	chr11	31794630	31794788	ENSG00000007372	ENST00000638802	PAX6	PAX6-240	6	69648.4	69624.9	61299.6	171632	189377	151901
ENSE00003698739	105502	1.35455	0.111627	12.1346	6.92129e-34	3.92843e-32	chr11	31794630	31794788	ENSG00000007372	ENST00000639034	PAX6	PAX6-248	8	69648.4	69624.9	61299.6	171632	189377	151901
ENSE00003698739	105502	1.35455	0.111627	12.1346	6.92129e-34	3.92843e-32	chr11	31794630	31794788	ENSG00000007372	ENST00000640975	PAX6	PAX6-281	9	69648.4	69624.9	61299.6	171632	189377	151901
ENSE00003698739	105502	1.35455	0.111627	12.1346	6.92129e-34	3.92843e-32	chr11	31794630	31794788	ENSG00000007372	ENST00000524853	PAX6	PAX6-219	8	69648.4	69624.9	61299.6	171632	189377	151901
ENSE00003698739	105502	1.35455	0.111627	12.1346	6.92129e-34	3.92843e-32	chr11	31794630	31794788	ENSG00000007372	ENST00000379111	PAX6	PAX6-204	8	69648.4	69624.9	61299.6	171632	189377	151901
ENSE00003698739	105502	1.35455	0.111627	12.1346	6.92129e-34	3.92843e-32	chr11	31794630	31794788	ENSG00000007372	ENST00000639006	PAX6	PAX6-247	7	69648.4	69624.9	61299.6	171632	189377	151901
ENSE00003698739	105502	1.35455	0.111627	12.1346	6.92129e-34	3.92843e-32	chr11	31794630	31794788	ENSG00000007372	ENST00000455099	PAX6	PAX6-212	9	69648.4	69624.9	61299.6	171632	189377	151901
ENSE00003698739	105502	1.35455	0.111627	12.1346	6.92129e-34	3.92843e-32	chr11	31794630	31794788	ENSG00000007372	ENST00000379123	PAX6	PAX6-206	9	69648.4	69624.9	61299.6	171632	189377	151901
ENSE00003698739	105502	1.35455	0.111627	12.1346	6.92129e-34	3.92843e-32	chr11	31794630	31794788	ENSG00000007372	ENST00000640872	PAX6	PAX6-279	4	69648.4	69624.9	61299.6	171632	189377	151901
ENSE00003698739	105502	1.35455	0.111627	12.1346	6.92129e-34	3.92843e-32	chr11	31794630	31794788	ENSG00000007372	ENST00000438681	PAX6	PAX6-211	9	69648.4	69624.9	61299.6	171632	189377	151901
ENSE00003698739	105502	1.35455	0.111627	12.1346	6.92129e-34	3.92843e-32	chr11	31794630	31794788	ENSG00000007372	ENST00000419022	PAX6	PAX6-209	9	69648.4	69624.9	61299.6	171632	189377	151901
ENSE00003698739	105502	1.35455	0.111627	12.1346	6.92129e-34	3.92843e-32	chr11	31794630	31794788	ENSG00000007372	ENST00000638346	PAX6	PAX6-234	5	69648.4	69624.9	61299.6	171632	189377	151901
ENSE00003698739	105502	1.35455	0.111627	12.1346	6.92129e-34	3.92843e-32	chr11	31794630	31794788	ENSG00000007372	ENST00000639916	PAX6	PAX6-258	7	69648.4	69624.9	61299.6	171632	189377	151901
ENSE00003698739	105502	1.35455	0.111627	12.1346	6.92129e-34	3.92843e-32	chr11	31794630	31794788	ENSG00000007372	ENST00000379107	PAX6	PAX6-202	8	69648.4	69624.9	61299.6	171632	189377	151901
ENSE00003698739	105502	1.35455	0.111627	12.1346	6.92129e-34	3.92843e-32	chr11	31794630	31794788	ENSG00000007372	ENST00000379132	PAX6	PAX6-208	7	69648.4	69624.9	61299.6	171632	189377	151901
ENSE00003698739	105502	1.35455	0.111627	12.1346	6.92129e-34	3.92843e-32	chr11	31794630	31794788	ENSG00000007372	ENST00000640766	PAX6	PAX6-277	6	69648.4	69624.9	61299.6	171632	189377	151901
ENSE00003698739	105502	1.35455	0.111627	12.1346	6.92129e-34	3.92843e-32	chr11	31794630	31794788	ENSG00000007372	ENST00000638629	PAX6	PAX6-235	5	69648.4	69624.9	61299.6	171632	189377	151901
ENSE00003698739	105502	1.35455	0.111627	12.1346	6.92129e-34	3.92843e-32	chr11	31794630	31794788	ENSG00000007372	ENST00000638963	PAX6	PAX6-245	5	69648.4	69624.9	61299.6	171632	189377	151901
ENSE00003698739	105502	1.35455	0.111627	12.1346	6.92129e-34	3.92843e-32	chr11	31794630	31794788	ENSG00000007372	ENST00000638696	PAX6	PAX6-237	6	69648.4	69624.9	61299.6	171632	189377	151901
ENSE00003698739	105502	1.35455	0.111627	12.1346	6.92129e-34	3.92843e-32	chr11	31794630	31794788	ENSG00000007372	ENST00000639061	PAX6	PAX6-250	5	69648.4	69624.9	61299.6	171632	189377	151901
ENSE00003698739	105502	1.35455	0.111627	12.1346	6.92129e-34	3.92843e-32	chr11	31794630	31794788	ENSG00000007372	ENST00000639950	PAX6	PAX6-261	8	69648.4	69624.9	61299.6	171632	189377	151901
ENSE00003698739	105502	1.35455	0.111627	12.1346	6.92129e-34	3.92843e-32	chr11	31794630	31794788	ENSG00000007372	ENST00000643871	PAX6	PAX6-282	8	69648.4	69624.9	61299.6	171632	189377	151901
ENSE00003806986	105502	1.35455	0.111627	12.1346	6.92129e-34	3.92843e-32	chr11	31794630	31794788	ENSG00000007372	ENST00000638965	PAX6	PAX6-246	2	69648.4	69624.9	61299.6	171632	189377	151901
ENSE00003806035	123.666	2.20254	0.653115	3.37236	0.000745261	0.0028896	chr11	31800535	31800667	ENSG00000007372	ENST00000530373	PAX6	PAX6-222	1	77.4785	48.5048	27.082	177.092	200.894	327.558
ENSE00002163500	99.4919	2.34857	0.661568	3.55	0.000385228	0.00162586	chr11	31800539	31800651	ENSG00000007372	ENST00000464174	PAX6	PAX6-213	1	50.3611	41.9753	23.5496	166.809	141.37	282.891
ENSE00001890785	100963	1.52182	0.122081	12.4656	1.14949e-35	7.88356e-34	chr11	31800691	31801776	ENSG00000007372	ENST00000638913	PAX6	PAX6-243	6	61942.2	59080.7	54444.3	158706	202444	142718
ENSE00001890785	100963	1.52182	0.122081	12.4656	1.14949e-35	7.88356e-34	chr11	31800691	31801776	ENSG00000007372	ENST00000531910	PAX6	PAX6-224	2	61942.2	59080.7	54444.3	158706	202444	142718
ENSE00001890785	100963	1.52182	0.122081	12.4656	1.14949e-35	7.88356e-34	chr11	31800691	31801776	ENSG00000007372	ENST00000494377	PAX6	PAX6-218	2	61942.2	59080.7	54444.3	158706	202444	142718
ENSE00001890785	100963	1.52182	0.122081	12.4656	1.14949e-35	7.88356e-34	chr11	31800691	31801776	ENSG00000007372	ENST00000640172	PAX6	PAX6-264	7	61942.2	59080.7	54444.3	158706	202444	142718
ENSE00001890785	100963	1.52182	0.122081	12.4656	1.14949e-35	7.88356e-34	chr11	31800691	31801776	ENSG00000007372	ENST00000470027	PAX6	PAX6-214	2	61942.2	59080.7	54444.3	158706	202444	142718
ENSE00001890785	100963	1.52182	0.122081	12.4656	1.14949e-35	7.88356e-34	chr11	31800691	31801776	ENSG00000007372	ENST00000639054	PAX6	PAX6-249	5	61942.2	59080.7	54444.3	158706	202444	142718
ENSE00001912051	70973.5	1.51824	0.156028	9.73058	2.23312e-22	6.68312e-21	chr11	31800691	31800856	ENSG00000007372	ENST00000639079	PAX6	PAX6-251	3	44683.8	42868.9	39809.4	115526	144819	104479
ENSE00001912051	70973.5	1.51824	0.156028	9.73058	2.23312e-22	6.68312e-21	chr11	31800691	31800856	ENSG00000007372	ENST00000639548	PAX6	PAX6-257	5	44683.8	42868.9	39809.4	115526	144819	104479
ENSE00001912051	70973.5	1.51824	0.156028	9.73058	2.23312e-22	6.68312e-21	chr11	31800691	31800856	ENSG00000007372	ENST00000638762	PAX6	PAX6-239	4	44683.8	42868.9	39809.4	115526	144819	104479
ENSE00001912051	70973.5	1.51824	0.156028	9.73058	2.23312e-22	6.68312e-21	chr11	31800691	31800856	ENSG00000007372	ENST00000638346	PAX6	PAX6-234	4	44683.8	42868.9	39809.4	115526	144819	104479
ENSE00001912051	70973.5	1.51824	0.156028	9.73058	2.23312e-22	6.68312e-21	chr11	31800691	31800856	ENSG00000007372	ENST00000481563	PAX6	PAX6-217	5	44683.8	42868.9	39809.4	115526	144819	104479
ENSE00001912051	70973.5	1.51824	0.156028	9.73058	2.23312e-22	6.68312e-21	chr11	31800691	31800856	ENSG00000007372	ENST00000640766	PAX6	PAX6-277	5	44683.8	42868.9	39809.4	115526	144819	104479
ENSE00001912051	70973.5	1.51824	0.156028	9.73058	2.23312e-22	6.68312e-21	chr11	31800691	31800856	ENSG00000007372	ENST00000638878	PAX6	PAX6-242	4	44683.8	42868.9	39809.4	115526	144819	104479
ENSE00001912051	70973.5	1.51824	0.156028	9.73058	2.23312e-22	6.68312e-21	chr11	31800691	31800856	ENSG00000007372	ENST00000640872	PAX6	PAX6-279	3	44683.8	42868.9	39809.4	115526	144819	104479
ENSE00001912051	70973.5	1.51824	0.156028	9.73058	2.23312e-22	6.68312e-21	chr11	31800691	31800856	ENSG00000007372	ENST00000638250	PAX6	PAX6-232	5	44683.8	42868.9	39809.4	115526	144819	104479
ENSE00001912051	70973.5	1.51824	0.156028	9.73058	2.23312e-22	6.68312e-21	chr11	31800691	31800856	ENSG00000007372	ENST00000379123	PAX6	PAX6-206	8	44683.8	42868.9	39809.4	115526	144819	104479
ENSE00001912051	70973.5	1.51824	0.156028	9.73058	2.23312e-22	6.68312e-21	chr11	31800691	31800856	ENSG00000007372	ENST00000639386	PAX6	PAX6-254	4	44683.8	42868.9	39809.4	115526	144819	104479
ENSE00001912051	70973.5	1.51824	0.156028	9.73058	2.23312e-22	6.68312e-21	chr11	31800691	31800856	ENSG00000007372	ENST00000639109	PAX6	PAX6-252	3	44683.8	42868.9	39809.4	115526	144819	104479
ENSE00001912051	70973.5	1.51824	0.156028	9.73058	2.23312e-22	6.68312e-21	chr11	31800691	31800856	ENSG00000007372	ENST00000638802	PAX6	PAX6-240	5	44683.8	42868.9	39809.4	115526	144819	104479
ENSE00001912051	70973.5	1.51824	0.156028	9.73058	2.23312e-22	6.68312e-21	chr11	31800691	31800856	ENSG00000007372	ENST00000639006	PAX6	PAX6-247	6	44683.8	42868.9	39809.4	115526	144819	104479
ENSE00001912051	70973.5	1.51824	0.156028	9.73058	2.23312e-22	6.68312e-21	chr11	31800691	31800856	ENSG00000007372	ENST00000638853	PAX6	PAX6-241	6	44683.8	42868.9	39809.4	115526	144819	104479
ENSE00001912051	70973.5	1.51824	0.156028	9.73058	2.23312e-22	6.68312e-21	chr11	31800691	31800856	ENSG00000007372	ENST00000638629	PAX6	PAX6-235	4	44683.8	42868.9	39809.4	115526	144819	104479
ENSE00001912051	70973.5	1.51824	0.156028	9.73058	2.23312e-22	6.68312e-21	chr11	31800691	31800856	ENSG00000007372	ENST00000640125	PAX6	PAX6-263	4	44683.8	42868.9	39809.4	115526	144819	104479
ENSE00001912051	70973.5	1.51824	0.156028	9.73058	2.23312e-22	6.68312e-21	chr11	31800691	31800856	ENSG00000007372	ENST00000639061	PAX6	PAX6-250	4	44683.8	42868.9	39809.4	115526	144819	104479
ENSE00003695229	70973.5	1.51824	0.156028	9.73058	2.23312e-22	6.68312e-21	chr11	31800691	31800856	ENSG00000007372	ENST00000640963	PAX6	PAX6-280	6	44683.8	42868.9	39809.4	115526	144819	104479
ENSE00003695229	70973.5	1.51824	0.156028	9.73058	2.23312e-22	6.68312e-21	chr11	31800691	31800856	ENSG00000007372	ENST00000241001	PAX6	PAX6-201	7	44683.8	42868.9	39809.4	115526	144819	104479
ENSE00003695229	70973.5	1.51824	0.156028	9.73058	2.23312e-22	6.68312e-21	chr11	31800691	31800856	ENSG00000007372	ENST00000423822	PAX6	PAX6-210	8	44683.8	42868.9	39809.4	115526	144819	104479
ENSE00003695229	70973.5	1.51824	0.156028	9.73058	2.23312e-22	6.68312e-21	chr11	31800691	31800856	ENSG00000007372	ENST00000640242	PAX6	PAX6-265	4	44683.8	42868.9	39809.4	115526	144819	104479
ENSE00003695229	70973.5	1.51824	0.156028	9.73058	2.23312e-22	6.68312e-21	chr11	31800691	31800856	ENSG00000007372	ENST00000640287	PAX6	PAX6-267	4	44683.8	42868.9	39809.4	115526	144819	104479
ENSE00003695229	70973.5	1.51824	0.156028	9.73058	2.23312e-22	6.68312e-21	chr11	31800691	31800856	ENSG00000007372	ENST00000638963	PAX6	PAX6-245	4	44683.8	42868.9	39809.4	115526	144819	104479
ENSE00003695229	70973.5	1.51824	0.156028	9.73058	2.23312e-22	6.68312e-21	chr11	31800691	31800856	ENSG00000007372	ENST00000640613	PAX6	PAX6-273	7	44683.8	42868.9	39809.4	115526	144819	104479
ENSE00003695229	70973.5	1.51824	0.156028	9.73058	2.23312e-22	6.68312e-21	chr11	31800691	31800856	ENSG00000007372	ENST00000638914	PAX6	PAX6-244	8	44683.8	42868.9	39809.4	115526	144819	104479
ENSE00003695229	70973.5	1.51824	0.156028	9.73058	2.23312e-22	6.68312e-21	chr11	31800691	31800856	ENSG00000007372	ENST00000640460	PAX6	PAX6-271	6	44683.8	42868.9	39809.4	115526	144819	104479
ENSE00003695229	70973.5	1.51824	0.156028	9.73058	2.23312e-22	6.68312e-21	chr11	31800691	31800856	ENSG00000007372	ENST00000639409	PAX6	PAX6-256	8	44683.8	42868.9	39809.4	115526	144819	104479
ENSE00003695229	70973.5	1.51824	0.156028	9.73058	2.23312e-22	6.68312e-21	chr11	31800691	31800856	ENSG00000007372	ENST00000606377	PAX6	PAX6-231	7	44683.8	42868.9	39809.4	115526	144819	104479
ENSE00003695229	70973.5	1.51824	0.156028	9.73058	2.23312e-22	6.68312e-21	chr11	31800691	31800856	ENSG00000007372	ENST00000455099	PAX6	PAX6-212	8	44683.8	42868.9	39809.4	115526	144819	104479
ENSE00003695229	70973.5	1.51824	0.156028	9.73058	2.23312e-22	6.68312e-21	chr11	31800691	31800856	ENSG00000007372	ENST00000640368	PAX6	PAX6-269	8	44683.8	42868.9	39809.4	115526	144819	104479
ENSE00003695229	70973.5	1.51824	0.156028	9.73058	2.23312e-22	6.68312e-21	chr11	31800691	31800856	ENSG00000007372	ENST00000639950	PAX6	PAX6-261	7	44683.8	42868.9	39809.4	115526	144819	104479
ENSE00003695229	70973.5	1.51824	0.156028	9.73058	2.23312e-22	6.68312e-21	chr11	31800691	31800856	ENSG00000007372	ENST00000640431	PAX6	PAX6-270	8	44683.8	42868.9	39809.4	115526	144819	104479
ENSE00003695229	70973.5	1.51824	0.156028	9.73058	2.23312e-22	6.68312e-21	chr11	31800691	31800856	ENSG00000007372	ENST00000638755	PAX6	PAX6-238	4	44683.8	42868.9	39809.4	115526	144819	104479
ENSE00003695229	70973.5	1.51824	0.156028	9.73058	2.23312e-22	6.68312e-21	chr11	31800691	31800856	ENSG00000007372	ENST00000379109	PAX6	PAX6-203	6	44683.8	42868.9	39809.4	115526	144819	104479
ENSE00003695229	70973.5	1.51824	0.156028	9.73058	2.23312e-22	6.68312e-21	chr11	31800691	31800856	ENSG00000007372	ENST00000379115	PAX6	PAX6-205	8	44683.8	42868.9	39809.4	115526	144819	104479
ENSE00003695229	70973.5	1.51824	0.156028	9.73058	2.23312e-22	6.68312e-21	chr11	31800691	31800856	ENSG00000007372	ENST00000379111	PAX6	PAX6-204	7	44683.8	42868.9	39809.4	115526	144819	104479
ENSE00003695229	70973.5	1.51824	0.156028	9.73058	2.23312e-22	6.68312e-21	chr11	31800691	31800856	ENSG00000007372	ENST00000640975	PAX6	PAX6-281	8	44683.8	42868.9	39809.4	115526	144819	104479
ENSE00003695229	70973.5	1.51824	0.156028	9.73058	2.23312e-22	6.68312e-21	chr11	31800691	31800856	ENSG00000007372	ENST00000524853	PAX6	PAX6-219	7	44683.8	42868.9	39809.4	115526	144819	104479
ENSE00003695229	70973.5	1.51824	0.156028	9.73058	2.23312e-22	6.68312e-21	chr11	31800691	31800856	ENSG00000007372	ENST00000379107	PAX6	PAX6-202	7	44683.8	42868.9	39809.4	115526	144819	104479
ENSE00003695229	70973.5	1.51824	0.156028	9.73058	2.23312e-22	6.68312e-21	chr11	31800691	31800856	ENSG00000007372	ENST00000639943	PAX6	PAX6-260	7	44683.8	42868.9	39809.4	115526	144819	104479
ENSE00003695229	70973.5	1.51824	0.156028	9.73058	2.23312e-22	6.68312e-21	chr11	31800691	31800856	ENSG00000007372	ENST00000639916	PAX6	PAX6-258	6	44683.8	42868.9	39809.4	115526	144819	104479
ENSE00003695229	70973.5	1.51824	0.156028	9.73058	2.23312e-22	6.68312e-21	chr11	31800691	31800856	ENSG00000007372	ENST00000640684	PAX6	PAX6-275	7	44683.8	42868.9	39809.4	115526	144819	104479
ENSE00003695229	70973.5	1.51824	0.156028	9.73058	2.23312e-22	6.68312e-21	chr11	31800691	31800856	ENSG00000007372	ENST00000640610	PAX6	PAX6-272	7	44683.8	42868.9	39809.4	115526	144819	104479
ENSE00003695229	70973.5	1.51824	0.156028	9.73058	2.23312e-22	6.68312e-21	chr11	31800691	31800856	ENSG00000007372	ENST00000638696	PAX6	PAX6-237	5	44683.8	42868.9	39809.4	115526	144819	104479
ENSE00003695229	70973.5	1.51824	0.156028	9.73058	2.23312e-22	6.68312e-21	chr11	31800691	31800856	ENSG00000007372	ENST00000643871	PAX6	PAX6-282	7	44683.8	42868.9	39809.4	115526	144819	104479
ENSE00003695229	70973.5	1.51824	0.156028	9.73058	2.23312e-22	6.68312e-21	chr11	31800691	31800856	ENSG00000007372	ENST00000639034	PAX6	PAX6-248	7	44683.8	42868.9	39809.4	115526	144819	104479
ENSE00003695229	70973.5	1.51824	0.156028	9.73058	2.23312e-22	6.68312e-21	chr11	31800691	31800856	ENSG00000007372	ENST00000379129	PAX6	PAX6-207	7	44683.8	42868.9	39809.4	115526	144819	104479
ENSE00003695229	70973.5	1.51824	0.156028	9.73058	2.23312e-22	6.68312e-21	chr11	31800691	31800856	ENSG00000007372	ENST00000438681	PAX6	PAX6-211	8	44683.8	42868.9	39809.4	115526	144819	104479
ENSE00003695229	70973.5	1.51824	0.156028	9.73058	2.23312e-22	6.68312e-21	chr11	31800691	31800856	ENSG00000007372	ENST00000419022	PAX6	PAX6-209	8	44683.8	42868.9	39809.4	115526	144819	104479
ENSE00003695229	70973.5	1.51824	0.156028	9.73058	2.23312e-22	6.68312e-21	chr11	31800691	31800856	ENSG00000007372	ENST00000379132	PAX6	PAX6-208	6	44683.8	42868.9	39809.4	115526	144819	104479
ENSE00003695512	70973.5	1.51824	0.156028	9.73058	2.23312e-22	6.68312e-21	chr11	31800691	31800856	ENSG00000007372	ENST00000474783	PAX6	PAX6-216	7	44683.8	42868.9	39809.4	115526	144819	104479
ENSE00003695512	70973.5	1.51824	0.156028	9.73058	2.23312e-22	6.68312e-21	chr11	31800691	31800856	ENSG00000007372	ENST00000533333	PAX6	PAX6-228	5	44683.8	42868.9	39809.4	115526	144819	104479
ENSE00003695512	70973.5	1.51824	0.156028	9.73058	2.23312e-22	6.68312e-21	chr11	31800691	31800856	ENSG00000007372	ENST00000640735	PAX6	PAX6-276	2	44683.8	42868.9	39809.4	115526	144819	104479
ENSE00003695512	70973.5	1.51824	0.156028	9.73058	2.23312e-22	6.68312e-21	chr11	31800691	31800856	ENSG00000007372	ENST00000471303	PAX6	PAX6-215	6	44683.8	42868.9	39809.4	115526	144819	104479
ENSE00003695512	70973.5	1.51824	0.156028	9.73058	2.23312e-22	6.68312e-21	chr11	31800691	31800856	ENSG00000007372	ENST00000639394	PAX6	PAX6-255	7	44683.8	42868.9	39809.4	115526	144819	104479
ENSE00001855929	75008.8	1.47884	0.132177	11.1884	4.64795e-29	1.86598e-27	chr11	31801230	31801776	ENSG00000007372	ENST00000639109	PAX6	PAX6-252	2	46857.1	45360.4	41331.9	120218	150957	101070
ENSE00001855929	75008.8	1.47884	0.132177	11.1884	4.64795e-29	1.86598e-27	chr11	31801230	31801776	ENSG00000007372	ENST00000638629	PAX6	PAX6-235	3	46857.1	45360.4	41331.9	120218	150957	101070
ENSE00003808169	75008.8	1.47884	0.132177	11.1884	4.64795e-29	1.86598e-27	chr11	31801230	31801776	ENSG00000007372	ENST00000639394	PAX6	PAX6-255	6	46857.1	45360.4	41331.9	120218	150957	101070
ENSE00002183703	1005.98	1.03113	0.139354	7.39934	1.36867e-13	1.68122e-12	chr11	31801230	31801326	ENSG00000007372	ENST00000638853	PAX6	PAX6-241	5	755.416	766.749	652.324	1475	1676.59	1298.85
ENSE00002183703	1005.98	1.03113	0.139354	7.39934	1.36867e-13	1.68122e-12	chr11	31801230	31801326	ENSG00000007372	ENST00000639006	PAX6	PAX6-247	5	755.416	766.749	652.324	1475	1676.59	1298.85
ENSE00003801848	74198	1.48341	0.132222	11.2191	3.28725e-29	1.38739e-27	chr11	31801464	31801776	ENSG00000007372	ENST00000530714	PAX6	PAX6-223	5	46277	44778.3	40795	119067	149502	100105
ENSE00002175000	154432	1.4817	0.110733	13.3809	7.81923e-41	7.15025e-39	chr11	31801561	31806462	ENSG00000007372	ENST00000533333	PAX6	PAX6-228	4	96700	95149.6	84196.9	254585	297057	219307
ENSE00003809193	74448.8	1.48737	0.131803	11.2849	1.55901e-29	6.75298e-28	chr11	31801561	31801992	ENSG00000007372	ENST00000640735	PAX6	PAX6-276	1	46364.1	44890.3	40869.2	119443	150163	100849
ENSE00003523920	74119.5	1.48358	0.13275	11.1757	5.36075e-29	1.96084e-27	chr11	31801561	31801776	ENSG00000007372	ENST00000638914	PAX6	PAX6-244	7	46244	44775.5	40791.4	119040	149480	100087
ENSE00003523920	74119.5	1.48358	0.13275	11.1757	5.36075e-29	1.96084e-27	chr11	31801561	31801776	ENSG00000007372	ENST00000640963	PAX6	PAX6-280	5	46244	44775.5	40791.4	119040	149480	100087
ENSE00003523920	74119.5	1.48358	0.13275	11.1757	5.36075e-29	1.96084e-27	chr11	31801561	31801776	ENSG00000007372	ENST00000640368	PAX6	PAX6-269	7	46244	44775.5	40791.4	119040	149480	100087
ENSE00003523920	74119.5	1.48358	0.13275	11.1757	5.36075e-29	1.96084e-27	chr11	31801561	31801776	ENSG00000007372	ENST00000379111	PAX6	PAX6-204	6	46244	44775.5	40791.4	119040	149480	100087
ENSE00003523920	74119.5	1.48358	0.13275	11.1757	5.36075e-29	1.96084e-27	chr11	31801561	31801776	ENSG00000007372	ENST00000241001	PAX6	PAX6-201	6	46244	44775.5	40791.4	119040	149480	100087
ENSE00003523920	74119.5	1.48358	0.13275	11.1757	5.36075e-29	1.96084e-27	chr11	31801561	31801776	ENSG00000007372	ENST00000379109	PAX6	PAX6-203	5	46244	44775.5	40791.4	119040	149480	100087
ENSE00003523920	74119.5	1.48358	0.13275	11.1757	5.36075e-29	1.96084e-27	chr11	31801561	31801776	ENSG00000007372	ENST00000639409	PAX6	PAX6-256	7	46244	44775.5	40791.4	119040	149480	100087
ENSE00003523920	74119.5	1.48358	0.13275	11.1757	5.36075e-29	1.96084e-27	chr11	31801561	31801776	ENSG00000007372	ENST00000524853	PAX6	PAX6-219	6	46244	44775.5	40791.4	119040	149480	100087
ENSE00003523920	74119.5	1.48358	0.13275	11.1757	5.36075e-29	1.96084e-27	chr11	31801561	31801776	ENSG00000007372	ENST00000640460	PAX6	PAX6-271	5	46244	44775.5	40791.4	119040	149480	100087
ENSE00003523920	74119.5	1.48358	0.13275	11.1757	5.36075e-29	1.96084e-27	chr11	31801561	31801776	ENSG00000007372	ENST00000640684	PAX6	PAX6-275	6	46244	44775.5	40791.4	119040	149480	100087
ENSE00003523920	74119.5	1.48358	0.13275	11.1757	5.36075e-29	1.96084e-27	chr11	31801561	31801776	ENSG00000007372	ENST00000455099	PAX6	PAX6-212	7	46244	44775.5	40791.4	119040	149480	100087
ENSE00003523920	74119.5	1.48358	0.13275	11.1757	5.36075e-29	1.96084e-27	chr11	31801561	31801776	ENSG00000007372	ENST00000639034	PAX6	PAX6-248	6	46244	44775.5	40791.4	119040	149480	100087
ENSE00003523920	74119.5	1.48358	0.13275	11.1757	5.36075e-29	1.96084e-27	chr11	31801561	31801776	ENSG00000007372	ENST00000640610	PAX6	PAX6-272	6	46244	44775.5	40791.4	119040	149480	100087
ENSE00003523920	74119.5	1.48358	0.13275	11.1757	5.36075e-29	1.96084e-27	chr11	31801561	31801776	ENSG00000007372	ENST00000638963	PAX6	PAX6-245	3	46244	44775.5	40791.4	119040	149480	100087
ENSE00003523920	74119.5	1.48358	0.13275	11.1757	5.36075e-29	1.96084e-27	chr11	31801561	31801776	ENSG00000007372	ENST00000640242	PAX6	PAX6-265	3	46244	44775.5	40791.4	119040	149480	100087
ENSE00003523920	74119.5	1.48358	0.13275	11.1757	5.36075e-29	1.96084e-27	chr11	31801561	31801776	ENSG00000007372	ENST00000379132	PAX6	PAX6-208	5	46244	44775.5	40791.4	119040	149480	100087
ENSE00003523920	74119.5	1.48358	0.13275	11.1757	5.36075e-29	1.96084e-27	chr11	31801561	31801776	ENSG00000007372	ENST00000379107	PAX6	PAX6-202	6	46244	44775.5	40791.4	119040	149480	100087
ENSE00003523920	74119.5	1.48358	0.13275	11.1757	5.36075e-29	1.96084e-27	chr11	31801561	31801776	ENSG00000007372	ENST00000640287	PAX6	PAX6-267	3	46244	44775.5	40791.4	119040	149480	100087
ENSE00003523920	74119.5	1.48358	0.13275	11.1757	5.36075e-29	1.96084e-27	chr11	31801561	31801776	ENSG00000007372	ENST00000606377	PAX6	PAX6-231	6	46244	44775.5	40791.4	119040	149480	100087
ENSE00003523920	74119.5	1.48358	0.13275	11.1757	5.36075e-29	1.96084e-27	chr11	31801561	31801776	ENSG00000007372	ENST00000379129	PAX6	PAX6-207	6	46244	44775.5	40791.4	119040	149480	100087
ENSE00003523920	74119.5	1.48358	0.13275	11.1757	5.36075e-29	1.96084e-27	chr11	31801561	31801776	ENSG00000007372	ENST00000640431	PAX6	PAX6-270	7	46244	44775.5	40791.4	119040	149480	100087
ENSE00003523920	74119.5	1.48358	0.13275	11.1757	5.36075e-29	1.96084e-27	chr11	31801561	31801776	ENSG00000007372	ENST00000643871	PAX6	PAX6-282	6	46244	44775.5	40791.4	119040	149480	100087
ENSE00003523920	74119.5	1.48358	0.13275	11.1757	5.36075e-29	1.96084e-27	chr11	31801561	31801776	ENSG00000007372	ENST00000639950	PAX6	PAX6-261	6	46244	44775.5	40791.4	119040	149480	100087
ENSE00003523920	74119.5	1.48358	0.13275	11.1757	5.36075e-29	1.96084e-27	chr11	31801561	31801776	ENSG00000007372	ENST00000640975	PAX6	PAX6-281	7	46244	44775.5	40791.4	119040	149480	100087
ENSE00003523920	74119.5	1.48358	0.13275	11.1757	5.36075e-29	1.96084e-27	chr11	31801561	31801776	ENSG00000007372	ENST00000419022	PAX6	PAX6-209	7	46244	44775.5	40791.4	119040	149480	100087
ENSE00003523920	74119.5	1.48358	0.13275	11.1757	5.36075e-29	1.96084e-27	chr11	31801561	31801776	ENSG00000007372	ENST00000639916	PAX6	PAX6-258	5	46244	44775.5	40791.4	119040	149480	100087
ENSE00003652899	74119.5	1.48358	0.13275	11.1757	5.36075e-29	1.96084e-27	chr11	31801561	31801776	ENSG00000007372	ENST00000639061	PAX6	PAX6-250	3	46244	44775.5	40791.4	119040	149480	100087
ENSE00003652899	74119.5	1.48358	0.13275	11.1757	5.36075e-29	1.96084e-27	chr11	31801561	31801776	ENSG00000007372	ENST00000638878	PAX6	PAX6-242	3	46244	44775.5	40791.4	119040	149480	100087
ENSE00003652899	74119.5	1.48358	0.13275	11.1757	5.36075e-29	1.96084e-27	chr11	31801561	31801776	ENSG00000007372	ENST00000638762	PAX6	PAX6-239	3	46244	44775.5	40791.4	119040	149480	100087
ENSE00003652899	74119.5	1.48358	0.13275	11.1757	5.36075e-29	1.96084e-27	chr11	31801561	31801776	ENSG00000007372	ENST00000638250	PAX6	PAX6-232	4	46244	44775.5	40791.4	119040	149480	100087
ENSE00003652899	74119.5	1.48358	0.13275	11.1757	5.36075e-29	1.96084e-27	chr11	31801561	31801776	ENSG00000007372	ENST00000640872	PAX6	PAX6-279	2	46244	44775.5	40791.4	119040	149480	100087
ENSE00003652899	74119.5	1.48358	0.13275	11.1757	5.36075e-29	1.96084e-27	chr11	31801561	31801776	ENSG00000007372	ENST00000474783	PAX6	PAX6-216	6	46244	44775.5	40791.4	119040	149480	100087
ENSE00003652899	74119.5	1.48358	0.13275	11.1757	5.36075e-29	1.96084e-27	chr11	31801561	31801776	ENSG00000007372	ENST00000638346	PAX6	PAX6-234	3	46244	44775.5	40791.4	119040	149480	100087
ENSE00003652899	74119.5	1.48358	0.13275	11.1757	5.36075e-29	1.96084e-27	chr11	31801561	31801776	ENSG00000007372	ENST00000639006	PAX6	PAX6-247	4	46244	44775.5	40791.4	119040	149480	100087
ENSE00003652899	74119.5	1.48358	0.13275	11.1757	5.36075e-29	1.96084e-27	chr11	31801561	31801776	ENSG00000007372	ENST00000639386	PAX6	PAX6-254	3	46244	44775.5	40791.4	119040	149480	100087
ENSE00003652899	74119.5	1.48358	0.13275	11.1757	5.36075e-29	1.96084e-27	chr11	31801561	31801776	ENSG00000007372	ENST00000471303	PAX6	PAX6-215	5	46244	44775.5	40791.4	119040	149480	100087
ENSE00003652899	74119.5	1.48358	0.13275	11.1757	5.36075e-29	1.96084e-27	chr11	31801561	31801776	ENSG00000007372	ENST00000640766	PAX6	PAX6-277	4	46244	44775.5	40791.4	119040	149480	100087
ENSE00003652899	74119.5	1.48358	0.13275	11.1757	5.36075e-29	1.96084e-27	chr11	31801561	31801776	ENSG00000007372	ENST00000379123	PAX6	PAX6-206	7	46244	44775.5	40791.4	119040	149480	100087
ENSE00003652899	74119.5	1.48358	0.13275	11.1757	5.36075e-29	1.96084e-27	chr11	31801561	31801776	ENSG00000007372	ENST00000481563	PAX6	PAX6-217	4	46244	44775.5	40791.4	119040	149480	100087
ENSE00003652899	74119.5	1.48358	0.13275	11.1757	5.36075e-29	1.96084e-27	chr11	31801561	31801776	ENSG00000007372	ENST00000638802	PAX6	PAX6-240	4	46244	44775.5	40791.4	119040	149480	100087
ENSE00003652899	74119.5	1.48358	0.13275	11.1757	5.36075e-29	1.96084e-27	chr11	31801561	31801776	ENSG00000007372	ENST00000639079	PAX6	PAX6-251	2	46244	44775.5	40791.4	119040	149480	100087
ENSE00002186077	71533.9	1.48584	0.139984	10.6144	2.55555e-26	8.24791e-25	chr11	31801578	31801776	ENSG00000007372	ENST00000534353	PAX6	PAX6-229	4	44793.3	43425.8	39216	115222	145407	96300.4
ENSE00002192230	45823.9	1.46281	0.165272	8.85094	8.6789e-19	1.93047e-17	chr11	31801669	31801776	ENSG00000007372	ENST00000639548	PAX6	PAX6-257	4	30283.5	28429.4	25036.8	76512.9	91179.7	63166.2
ENSE00002192230	45823.9	1.46281	0.165272	8.85094	8.6789e-19	1.93047e-17	chr11	31801669	31801776	ENSG00000007372	ENST00000640125	PAX6	PAX6-263	3	30283.5	28429.4	25036.8	76512.9	91179.7	63166.2
ENSE00003809225	45823.9	1.46281	0.165272	8.85094	8.6789e-19	1.93047e-17	chr11	31801669	31801776	ENSG00000007372	ENST00000638696	PAX6	PAX6-237	4	30283.5	28429.4	25036.8	76512.9	91179.7	63166.2
ENSE00003809225	45823.9	1.46281	0.165272	8.85094	8.6789e-19	1.93047e-17	chr11	31801669	31801776	ENSG00000007372	ENST00000638755	PAX6	PAX6-238	3	30283.5	28429.4	25036.8	76512.9	91179.7	63166.2
ENSE00002146291	27598.6	1.46784	0.167668	8.75446	2.05086e-18	4.27307e-17	chr11	31801727	31801776	ENSG00000007372	ENST00000533156	PAX6	PAX6-227	4	18449.6	17277	15204.8	46133	55101.9	39651.2
ENSE00002141603	21936.9	1.4924	0.16853	8.85539	8.33936e-19	1.90647e-17	chr11	31801742	31801776	ENSG00000007372	ENST00000639920	PAX6	PAX6-259	6	14712.2	13662.5	11927.9	37004.2	43899	32496.6
ENSE00003638387	17152.6	1.50644	0.168751	8.927	4.37704e-19	1.04415e-17	chr11	31801762	31801776	ENSG00000007372	ENST00000379115	PAX6	PAX6-205	7	11270.2	10777.4	9484.6	28343.9	34846.4	26400.8
ENSE00003638387	17152.6	1.50644	0.168751	8.927	4.37704e-19	1.04415e-17	chr11	31801762	31801776	ENSG00000007372	ENST00000423822	PAX6	PAX6-210	7	11270.2	10777.4	9484.6	28343.9	34846.4	26400.8
ENSE00003638387	17152.6	1.50644	0.168751	8.927	4.37704e-19	1.04415e-17	chr11	31801762	31801776	ENSG00000007372	ENST00000438681	PAX6	PAX6-211	7	11270.2	10777.4	9484.6	28343.9	34846.4	26400.8
ENSE00003638387	17152.6	1.50644	0.168751	8.927	4.37704e-19	1.04415e-17	chr11	31801762	31801776	ENSG00000007372	ENST00000640613	PAX6	PAX6-273	6	11270.2	10777.4	9484.6	28343.9	34846.4	26400.8
ENSE00003638387	17152.6	1.50644	0.168751	8.927	4.37704e-19	1.04415e-17	chr11	31801762	31801776	ENSG00000007372	ENST00000639943	PAX6	PAX6-260	6	11270.2	10777.4	9484.6	28343.9	34846.4	26400.8
ENSE00003808520	17152.6	1.50644	0.168751	8.927	4.37704e-19	1.04415e-17	chr11	31801762	31801776	ENSG00000007372	ENST00000638853	PAX6	PAX6-241	4	11270.2	10777.4	9484.6	28343.9	34846.4	26400.8
ENSE00003499781	6046	1.86117	0.174711	10.6528	1.69133e-26	5.68149e-25	chr11	31801871	31801912	ENSG00000007372	ENST00000638762	PAX6	PAX6-239	2	3523.34	3279.67	2795.34	10986.6	13786	10105.3
ENSE00003499781	6046	1.86117	0.174711	10.6528	1.69133e-26	5.68149e-25	chr11	31801871	31801912	ENSG00000007372	ENST00000534353	PAX6	PAX6-229	3	3523.34	3279.67	2795.34	10986.6	13786	10105.3
ENSE00003499781	6046	1.86117	0.174711	10.6528	1.69133e-26	5.68149e-25	chr11	31801871	31801912	ENSG00000007372	ENST00000481563	PAX6	PAX6-217	3	3523.34	3279.67	2795.34	10986.6	13786	10105.3
ENSE00003499781	6046	1.86117	0.174711	10.6528	1.69133e-26	5.68149e-25	chr11	31801871	31801912	ENSG00000007372	ENST00000640172	PAX6	PAX6-264	6	3523.34	3279.67	2795.34	10986.6	13786	10105.3
ENSE00003499781	6046	1.86117	0.174711	10.6528	1.69133e-26	5.68149e-25	chr11	31801871	31801912	ENSG00000007372	ENST00000639006	PAX6	PAX6-247	3	3523.34	3279.67	2795.34	10986.6	13786	10105.3
ENSE00003499781	6046	1.86117	0.174711	10.6528	1.69133e-26	5.68149e-25	chr11	31801871	31801912	ENSG00000007372	ENST00000530714	PAX6	PAX6-223	4	3523.34	3279.67	2795.34	10986.6	13786	10105.3
ENSE00003499781	6046	1.86117	0.174711	10.6528	1.69133e-26	5.68149e-25	chr11	31801871	31801912	ENSG00000007372	ENST00000638802	PAX6	PAX6-240	3	3523.34	3279.67	2795.34	10986.6	13786	10105.3
ENSE00003499781	6046	1.86117	0.174711	10.6528	1.69133e-26	5.68149e-25	chr11	31801871	31801912	ENSG00000007372	ENST00000638629	PAX6	PAX6-235	2	3523.34	3279.67	2795.34	10986.6	13786	10105.3
ENSE00003499781	6046	1.86117	0.174711	10.6528	1.69133e-26	5.68149e-25	chr11	31801871	31801912	ENSG00000007372	ENST00000639548	PAX6	PAX6-257	3	3523.34	3279.67	2795.34	10986.6	13786	10105.3
ENSE00003499781	6046	1.86117	0.174711	10.6528	1.69133e-26	5.68149e-25	chr11	31801871	31801912	ENSG00000007372	ENST00000638853	PAX6	PAX6-241	3	3523.34	3279.67	2795.34	10986.6	13786	10105.3
ENSE00003499781	6046	1.86117	0.174711	10.6528	1.69133e-26	5.68149e-25	chr11	31801871	31801912	ENSG00000007372	ENST00000533156	PAX6	PAX6-227	3	3523.34	3279.67	2795.34	10986.6	13786	10105.3
ENSE00003512677	6046	1.86117	0.174711	10.6528	1.69133e-26	5.68149e-25	chr11	31801871	31801912	ENSG00000007372	ENST00000438681	PAX6	PAX6-211	6	3523.34	3279.67	2795.34	10986.6	13786	10105.3
ENSE00003512677	6046	1.86117	0.174711	10.6528	1.69133e-26	5.68149e-25	chr11	31801871	31801912	ENSG00000007372	ENST00000640368	PAX6	PAX6-269	6	3523.34	3279.67	2795.34	10986.6	13786	10105.3
ENSE00003512677	6046	1.86117	0.174711	10.6528	1.69133e-26	5.68149e-25	chr11	31801871	31801912	ENSG00000007372	ENST00000455099	PAX6	PAX6-212	6	3523.34	3279.67	2795.34	10986.6	13786	10105.3
ENSE00003512677	6046	1.86117	0.174711	10.6528	1.69133e-26	5.68149e-25	chr11	31801871	31801912	ENSG00000007372	ENST00000379115	PAX6	PAX6-205	6	3523.34	3279.67	2795.34	10986.6	13786	10105.3
ENSE00003512677	6046	1.86117	0.174711	10.6528	1.69133e-26	5.68149e-25	chr11	31801871	31801912	ENSG00000007372	ENST00000638914	PAX6	PAX6-244	6	3523.34	3279.67	2795.34	10986.6	13786	10105.3
ENSE00003512677	6046	1.86117	0.174711	10.6528	1.69133e-26	5.68149e-25	chr11	31801871	31801912	ENSG00000007372	ENST00000640975	PAX6	PAX6-281	6	3523.34	3279.67	2795.34	10986.6	13786	10105.3
ENSE00003512677	6046	1.86117	0.174711	10.6528	1.69133e-26	5.68149e-25	chr11	31801871	31801912	ENSG00000007372	ENST00000639394	PAX6	PAX6-255	5	3523.34	3279.67	2795.34	10986.6	13786	10105.3
ENSE00003512677	6046	1.86117	0.174711	10.6528	1.69133e-26	5.68149e-25	chr11	31801871	31801912	ENSG00000007372	ENST00000640684	PAX6	PAX6-275	5	3523.34	3279.67	2795.34	10986.6	13786	10105.3
ENSE00003512677	6046	1.86117	0.174711	10.6528	1.69133e-26	5.68149e-25	chr11	31801871	31801912	ENSG00000007372	ENST00000639943	PAX6	PAX6-260	5	3523.34	3279.67	2795.34	10986.6	13786	10105.3
ENSE00003512677	6046	1.86117	0.174711	10.6528	1.69133e-26	5.68149e-25	chr11	31801871	31801912	ENSG00000007372	ENST00000640963	PAX6	PAX6-280	4	3523.34	3279.67	2795.34	10986.6	13786	10105.3
ENSE00003512677	6046	1.86117	0.174711	10.6528	1.69133e-26	5.68149e-25	chr11	31801871	31801912	ENSG00000007372	ENST00000640613	PAX6	PAX6-273	5	3523.34	3279.67	2795.34	10986.6	13786	10105.3
ENSE00003512677	6046	1.86117	0.174711	10.6528	1.69133e-26	5.68149e-25	chr11	31801871	31801912	ENSG00000007372	ENST00000639409	PAX6	PAX6-256	6	3523.34	3279.67	2795.34	10986.6	13786	10105.3
ENSE00003512677	6046	1.86117	0.174711	10.6528	1.69133e-26	5.68149e-25	chr11	31801871	31801912	ENSG00000007372	ENST00000606377	PAX6	PAX6-231	5	3523.34	3279.67	2795.34	10986.6	13786	10105.3
ENSE00003512677	6046	1.86117	0.174711	10.6528	1.69133e-26	5.68149e-25	chr11	31801871	31801912	ENSG00000007372	ENST00000419022	PAX6	PAX6-209	6	3523.34	3279.67	2795.34	10986.6	13786	10105.3
ENSE00003512677	6046	1.86117	0.174711	10.6528	1.69133e-26	5.68149e-25	chr11	31801871	31801912	ENSG00000007372	ENST00000639920	PAX6	PAX6-259	5	3523.34	3279.67	2795.34	10986.6	13786	10105.3
ENSE00003512677	6046	1.86117	0.174711	10.6528	1.69133e-26	5.68149e-25	chr11	31801871	31801912	ENSG00000007372	ENST00000640431	PAX6	PAX6-270	6	3523.34	3279.67	2795.34	10986.6	13786	10105.3
ENSE00003512677	6046	1.86117	0.174711	10.6528	1.69133e-26	5.68149e-25	chr11	31801871	31801912	ENSG00000007372	ENST00000379129	PAX6	PAX6-207	5	3523.34	3279.67	2795.34	10986.6	13786	10105.3
ENSE00003512677	6046	1.86117	0.174711	10.6528	1.69133e-26	5.68149e-25	chr11	31801871	31801912	ENSG00000007372	ENST00000379107	PAX6	PAX6-202	5	3523.34	3279.67	2795.34	10986.6	13786	10105.3
ENSE00003512677	6046	1.86117	0.174711	10.6528	1.69133e-26	5.68149e-25	chr11	31801871	31801912	ENSG00000007372	ENST00000423822	PAX6	PAX6-210	6	3523.34	3279.67	2795.34	10986.6	13786	10105.3
ENSE00003512677	6046	1.86117	0.174711	10.6528	1.69133e-26	5.68149e-25	chr11	31801871	31801912	ENSG00000007372	ENST00000638696	PAX6	PAX6-237	3	3523.34	3279.67	2795.34	10986.6	13786	10105.3
ENSE00003696407	6065.81	1.8595	0.175042	10.6232	2.32519e-26	7.65454e-25	chr11	31801871	31802014	ENSG00000007372	ENST00000531910	PAX6	PAX6-224	1	3542.71	3292.73	2798.87	11036.8	13799.7	10131.5
ENSE00003810943	74241.2	1.49526	0.100867	14.8242	1.02216e-49	1.68248e-46	chr11	31802704	31804460	ENSG00000007372	ENST00000470027	PAX6	PAX6-214	1	46834.8	45253.1	39961.3	120994	141210	110078
ENSE00003807339	74171.2	1.49526	0.101548	14.7247	4.47418e-49	3.45415e-46	chr11	31802704	31804258	ENSG00000007372	ENST00000638762	PAX6	PAX6-239	1	46834.8	45253.1	39961.3	120994	141210	110078
ENSE00003802022	74156.6	1.49526	0.101708	14.7016	6.29553e-49	3.45415e-46	chr11	31802704	31804255	ENSG00000007372	ENST00000639079	PAX6	PAX6-251	1	46834.8	45253.1	39961.3	120994	141210	110078
ENSE00001819707	66592.2	1.47885	0.106328	13.9084	5.62967e-44	1.32378e-41	chr11	31802704	31804046	ENSG00000007372	ENST00000638629	PAX6	PAX6-235	1	42690.7	40989.3	35954.4	107115	126616	99733.6
ENSE00003805043	66403.8	1.4782	0.107123	13.7991	2.57973e-43	4.71803e-41	chr11	31802704	31804006	ENSG00000007372	ENST00000639109	PAX6	PAX6-252	1	42551.2	40922.2	35847.2	106823	126289	99329
ENSE00003803770	64999.6	1.47666	0.108774	13.5754	5.60265e-42	5.76373e-40	chr11	31802704	31803960	ENSG00000007372	ENST00000640872	PAX6	PAX6-279	1	41735.8	40156.4	35100.7	104624	123595	97387.2
ENSE00002150960	22588	1.7606	0.203879	8.63553	5.84558e-18	1.18788e-16	chr11	31802704	31802946	ENSG00000007372	ENST00000494377	PAX6	PAX6-218	1	13398	12605.6	10887	36284.4	47125.7	41592.9
ENSE00003513121	21229.4	1.76857	0.21053	8.40054	4.44419e-17	8.40821e-16	chr11	31802704	31802834	ENSG00000007372	ENST00000639061	PAX6	PAX6-250	2	12634.8	11862.2	10208.8	34241.6	44338	39671.3
ENSE00003513121	21229.4	1.76857	0.21053	8.40054	4.44419e-17	8.40821e-16	chr11	31802704	31802834	ENSG00000007372	ENST00000640766	PAX6	PAX6-277	3	12634.8	11862.2	10208.8	34241.6	44338	39671.3
ENSE00003513121	21229.4	1.76857	0.21053	8.40054	4.44419e-17	8.40821e-16	chr11	31802704	31802834	ENSG00000007372	ENST00000639548	PAX6	PAX6-257	2	12634.8	11862.2	10208.8	34241.6	44338	39671.3
ENSE00003513121	21229.4	1.76857	0.21053	8.40054	4.44419e-17	8.40821e-16	chr11	31802704	31802834	ENSG00000007372	ENST00000639386	PAX6	PAX6-254	2	12634.8	11862.2	10208.8	34241.6	44338	39671.3
ENSE00003513121	21229.4	1.76857	0.21053	8.40054	4.44419e-17	8.40821e-16	chr11	31802704	31802834	ENSG00000007372	ENST00000638913	PAX6	PAX6-243	5	12634.8	11862.2	10208.8	34241.6	44338	39671.3
ENSE00003513121	21229.4	1.76857	0.21053	8.40054	4.44419e-17	8.40821e-16	chr11	31802704	31802834	ENSG00000007372	ENST00000471303	PAX6	PAX6-215	4	12634.8	11862.2	10208.8	34241.6	44338	39671.3
ENSE00003513121	21229.4	1.76857	0.21053	8.40054	4.44419e-17	8.40821e-16	chr11	31802704	31802834	ENSG00000007372	ENST00000640125	PAX6	PAX6-263	2	12634.8	11862.2	10208.8	34241.6	44338	39671.3
ENSE00003513121	21229.4	1.76857	0.21053	8.40054	4.44419e-17	8.40821e-16	chr11	31802704	31802834	ENSG00000007372	ENST00000533156	PAX6	PAX6-227	2	12634.8	11862.2	10208.8	34241.6	44338	39671.3
ENSE00003513121	21229.4	1.76857	0.21053	8.40054	4.44419e-17	8.40821e-16	chr11	31802704	31802834	ENSG00000007372	ENST00000530714	PAX6	PAX6-223	3	12634.8	11862.2	10208.8	34241.6	44338	39671.3
ENSE00003513121	21229.4	1.76857	0.21053	8.40054	4.44419e-17	8.40821e-16	chr11	31802704	31802834	ENSG00000007372	ENST00000638878	PAX6	PAX6-242	2	12634.8	11862.2	10208.8	34241.6	44338	39671.3
ENSE00003513121	21229.4	1.76857	0.21053	8.40054	4.44419e-17	8.40821e-16	chr11	31802704	31802834	ENSG00000007372	ENST00000379123	PAX6	PAX6-206	6	12634.8	11862.2	10208.8	34241.6	44338	39671.3
ENSE00003513121	21229.4	1.76857	0.21053	8.40054	4.44419e-17	8.40821e-16	chr11	31802704	31802834	ENSG00000007372	ENST00000638802	PAX6	PAX6-240	2	12634.8	11862.2	10208.8	34241.6	44338	39671.3
ENSE00003513121	21229.4	1.76857	0.21053	8.40054	4.44419e-17	8.40821e-16	chr11	31802704	31802834	ENSG00000007372	ENST00000534353	PAX6	PAX6-229	2	12634.8	11862.2	10208.8	34241.6	44338	39671.3
ENSE00003513121	21229.4	1.76857	0.21053	8.40054	4.44419e-17	8.40821e-16	chr11	31802704	31802834	ENSG00000007372	ENST00000638853	PAX6	PAX6-241	2	12634.8	11862.2	10208.8	34241.6	44338	39671.3
ENSE00003513121	21229.4	1.76857	0.21053	8.40054	4.44419e-17	8.40821e-16	chr11	31802704	31802834	ENSG00000007372	ENST00000639006	PAX6	PAX6-247	2	12634.8	11862.2	10208.8	34241.6	44338	39671.3
ENSE00003513121	21229.4	1.76857	0.21053	8.40054	4.44419e-17	8.40821e-16	chr11	31802704	31802834	ENSG00000007372	ENST00000481563	PAX6	PAX6-217	2	12634.8	11862.2	10208.8	34241.6	44338	39671.3
ENSE00003513121	21229.4	1.76857	0.21053	8.40054	4.44419e-17	8.40821e-16	chr11	31802704	31802834	ENSG00000007372	ENST00000639054	PAX6	PAX6-249	4	12634.8	11862.2	10208.8	34241.6	44338	39671.3
ENSE00003513121	21229.4	1.76857	0.21053	8.40054	4.44419e-17	8.40821e-16	chr11	31802704	31802834	ENSG00000007372	ENST00000474783	PAX6	PAX6-216	5	12634.8	11862.2	10208.8	34241.6	44338	39671.3
ENSE00003513121	21229.4	1.76857	0.21053	8.40054	4.44419e-17	8.40821e-16	chr11	31802704	31802834	ENSG00000007372	ENST00000640172	PAX6	PAX6-264	5	12634.8	11862.2	10208.8	34241.6	44338	39671.3
ENSE00003513121	21229.4	1.76857	0.21053	8.40054	4.44419e-17	8.40821e-16	chr11	31802704	31802834	ENSG00000007372	ENST00000638346	PAX6	PAX6-234	2	12634.8	11862.2	10208.8	34241.6	44338	39671.3
ENSE00003602163	21229.4	1.76857	0.21053	8.40054	4.44419e-17	8.40821e-16	chr11	31802704	31802834	ENSG00000007372	ENST00000423822	PAX6	PAX6-210	5	12634.8	11862.2	10208.8	34241.6	44338	39671.3
ENSE00003602163	21229.4	1.76857	0.21053	8.40054	4.44419e-17	8.40821e-16	chr11	31802704	31802834	ENSG00000007372	ENST00000640613	PAX6	PAX6-273	4	12634.8	11862.2	10208.8	34241.6	44338	39671.3
ENSE00003602163	21229.4	1.76857	0.21053	8.40054	4.44419e-17	8.40821e-16	chr11	31802704	31802834	ENSG00000007372	ENST00000640431	PAX6	PAX6-270	5	12634.8	11862.2	10208.8	34241.6	44338	39671.3
ENSE00003602163	21229.4	1.76857	0.21053	8.40054	4.44419e-17	8.40821e-16	chr11	31802704	31802834	ENSG00000007372	ENST00000524853	PAX6	PAX6-219	5	12634.8	11862.2	10208.8	34241.6	44338	39671.3
ENSE00003602163	21229.4	1.76857	0.21053	8.40054	4.44419e-17	8.40821e-16	chr11	31802704	31802834	ENSG00000007372	ENST00000640287	PAX6	PAX6-267	2	12634.8	11862.2	10208.8	34241.6	44338	39671.3
ENSE00003602163	21229.4	1.76857	0.21053	8.40054	4.44419e-17	8.40821e-16	chr11	31802704	31802834	ENSG00000007372	ENST00000638914	PAX6	PAX6-244	5	12634.8	11862.2	10208.8	34241.6	44338	39671.3
ENSE00003602163	21229.4	1.76857	0.21053	8.40054	4.44419e-17	8.40821e-16	chr11	31802704	31802834	ENSG00000007372	ENST00000639409	PAX6	PAX6-256	5	12634.8	11862.2	10208.8	34241.6	44338	39671.3
ENSE00003602163	21229.4	1.76857	0.21053	8.40054	4.44419e-17	8.40821e-16	chr11	31802704	31802834	ENSG00000007372	ENST00000379115	PAX6	PAX6-205	5	12634.8	11862.2	10208.8	34241.6	44338	39671.3
ENSE00003602163	21229.4	1.76857	0.21053	8.40054	4.44419e-17	8.40821e-16	chr11	31802704	31802834	ENSG00000007372	ENST00000640963	PAX6	PAX6-280	3	12634.8	11862.2	10208.8	34241.6	44338	39671.3
ENSE00003602163	21229.4	1.76857	0.21053	8.40054	4.44419e-17	8.40821e-16	chr11	31802704	31802834	ENSG00000007372	ENST00000606377	PAX6	PAX6-231	4	12634.8	11862.2	10208.8	34241.6	44338	39671.3
ENSE00003602163	21229.4	1.76857	0.21053	8.40054	4.44419e-17	8.40821e-16	chr11	31802704	31802834	ENSG00000007372	ENST00000640684	PAX6	PAX6-275	4	12634.8	11862.2	10208.8	34241.6	44338	39671.3
ENSE00003602163	21229.4	1.76857	0.21053	8.40054	4.44419e-17	8.40821e-16	chr11	31802704	31802834	ENSG00000007372	ENST00000639394	PAX6	PAX6-255	4	12634.8	11862.2	10208.8	34241.6	44338	39671.3
ENSE00003602163	21229.4	1.76857	0.21053	8.40054	4.44419e-17	8.40821e-16	chr11	31802704	31802834	ENSG00000007372	ENST00000640975	PAX6	PAX6-281	5	12634.8	11862.2	10208.8	34241.6	44338	39671.3
ENSE00003602163	21229.4	1.76857	0.21053	8.40054	4.44419e-17	8.40821e-16	chr11	31802704	31802834	ENSG00000007372	ENST00000639034	PAX6	PAX6-248	5	12634.8	11862.2	10208.8	34241.6	44338	39671.3
ENSE00003602163	21229.4	1.76857	0.21053	8.40054	4.44419e-17	8.40821e-16	chr11	31802704	31802834	ENSG00000007372	ENST00000379109	PAX6	PAX6-203	4	12634.8	11862.2	10208.8	34241.6	44338	39671.3
ENSE00003602163	21229.4	1.76857	0.21053	8.40054	4.44419e-17	8.40821e-16	chr11	31802704	31802834	ENSG00000007372	ENST00000438681	PAX6	PAX6-211	5	12634.8	11862.2	10208.8	34241.6	44338	39671.3
ENSE00003602163	21229.4	1.76857	0.21053	8.40054	4.44419e-17	8.40821e-16	chr11	31802704	31802834	ENSG00000007372	ENST00000241001	PAX6	PAX6-201	5	12634.8	11862.2	10208.8	34241.6	44338	39671.3
ENSE00003602163	21229.4	1.76857	0.21053	8.40054	4.44419e-17	8.40821e-16	chr11	31802704	31802834	ENSG00000007372	ENST00000639920	PAX6	PAX6-259	4	12634.8	11862.2	10208.8	34241.6	44338	39671.3
ENSE00003602163	21229.4	1.76857	0.21053	8.40054	4.44419e-17	8.40821e-16	chr11	31802704	31802834	ENSG00000007372	ENST00000639943	PAX6	PAX6-260	4	12634.8	11862.2	10208.8	34241.6	44338	39671.3
ENSE00003602163	21229.4	1.76857	0.21053	8.40054	4.44419e-17	8.40821e-16	chr11	31802704	31802834	ENSG00000007372	ENST00000640368	PAX6	PAX6-269	5	12634.8	11862.2	10208.8	34241.6	44338	39671.3
ENSE00003602163	21229.4	1.76857	0.21053	8.40054	4.44419e-17	8.40821e-16	chr11	31802704	31802834	ENSG00000007372	ENST00000639916	PAX6	PAX6-258	4	12634.8	11862.2	10208.8	34241.6	44338	39671.3
ENSE00003602163	21229.4	1.76857	0.21053	8.40054	4.44419e-17	8.40821e-16	chr11	31802704	31802834	ENSG00000007372	ENST00000638963	PAX6	PAX6-245	2	12634.8	11862.2	10208.8	34241.6	44338	39671.3
ENSE00003602163	21229.4	1.76857	0.21053	8.40054	4.44419e-17	8.40821e-16	chr11	31802704	31802834	ENSG00000007372	ENST00000643871	PAX6	PAX6-282	5	12634.8	11862.2	10208.8	34241.6	44338	39671.3
ENSE00003602163	21229.4	1.76857	0.21053	8.40054	4.44419e-17	8.40821e-16	chr11	31802704	31802834	ENSG00000007372	ENST00000638755	PAX6	PAX6-238	2	12634.8	11862.2	10208.8	34241.6	44338	39671.3
ENSE00003602163	21229.4	1.76857	0.21053	8.40054	4.44419e-17	8.40821e-16	chr11	31802704	31802834	ENSG00000007372	ENST00000455099	PAX6	PAX6-212	5	12634.8	11862.2	10208.8	34241.6	44338	39671.3
ENSE00003602163	21229.4	1.76857	0.21053	8.40054	4.44419e-17	8.40821e-16	chr11	31802704	31802834	ENSG00000007372	ENST00000640242	PAX6	PAX6-265	2	12634.8	11862.2	10208.8	34241.6	44338	39671.3
ENSE00003602163	21229.4	1.76857	0.21053	8.40054	4.44419e-17	8.40821e-16	chr11	31802704	31802834	ENSG00000007372	ENST00000379107	PAX6	PAX6-202	4	12634.8	11862.2	10208.8	34241.6	44338	39671.3
ENSE00003602163	21229.4	1.76857	0.21053	8.40054	4.44419e-17	8.40821e-16	chr11	31802704	31802834	ENSG00000007372	ENST00000640460	PAX6	PAX6-271	4	12634.8	11862.2	10208.8	34241.6	44338	39671.3
ENSE00003602163	21229.4	1.76857	0.21053	8.40054	4.44419e-17	8.40821e-16	chr11	31802704	31802834	ENSG00000007372	ENST00000419022	PAX6	PAX6-209	5	12634.8	11862.2	10208.8	34241.6	44338	39671.3
ENSE00003602163	21229.4	1.76857	0.21053	8.40054	4.44419e-17	8.40821e-16	chr11	31802704	31802834	ENSG00000007372	ENST00000379129	PAX6	PAX6-207	4	12634.8	11862.2	10208.8	34241.6	44338	39671.3
ENSE00003602163	21229.4	1.76857	0.21053	8.40054	4.44419e-17	8.40821e-16	chr11	31802704	31802834	ENSG00000007372	ENST00000379111	PAX6	PAX6-204	5	12634.8	11862.2	10208.8	34241.6	44338	39671.3
ENSE00003602163	21229.4	1.76857	0.21053	8.40054	4.44419e-17	8.40821e-16	chr11	31802704	31802834	ENSG00000007372	ENST00000639950	PAX6	PAX6-261	5	12634.8	11862.2	10208.8	34241.6	44338	39671.3
ENSE00003602163	21229.4	1.76857	0.21053	8.40054	4.44419e-17	8.40821e-16	chr11	31802704	31802834	ENSG00000007372	ENST00000638696	PAX6	PAX6-237	2	12634.8	11862.2	10208.8	34241.6	44338	39671.3
ENSE00003602163	21229.4	1.76857	0.21053	8.40054	4.44419e-17	8.40821e-16	chr11	31802704	31802834	ENSG00000007372	ENST00000640610	PAX6	PAX6-272	5	12634.8	11862.2	10208.8	34241.6	44338	39671.3
ENSE00003602163	21229.4	1.76857	0.21053	8.40054	4.44419e-17	8.40821e-16	chr11	31802704	31802834	ENSG00000007372	ENST00000379132	PAX6	PAX6-208	4	12634.8	11862.2	10208.8	34241.6	44338	39671.3
ENSE00001903809	45708.3	1.57955	0.129638	12.1843	3.76698e-34	2.38479e-32	chr11	31802740	31803726	ENSG00000007372	ENST00000534390	PAX6	PAX6-230	3	28068.5	26665.5	24402.1	72420.3	90521.2	73585
ENSE00003802319	7801.42	1.47958	0.211322	7.00157	2.53115e-12	2.75912e-11	chr11	31803020	31803245	ENSG00000007372	ENST00000639061	PAX6	PAX6-250	1	5085.5	4712.43	4339.01	12351.9	16142.2	10932.9
ENSE00003802954	16302.3	1.38747	0.12272	11.306	1.22613e-29	5.45464e-28	chr11	31803398	31803620	ENSG00000007372	ENST00000639006	PAX6	PAX6-247	1	10700.8	10245.7	9652.98	25766.3	30556.9	23737.5
ENSE00002185515	17281	1.40295	0.126215	11.1156	1.05336e-28	3.76919e-27	chr11	31803398	31803673	ENSG00000007372	ENST00000638878	PAX6	PAX6-242	1	11215	10794.2	10237	27338.4	32551	25389.3
ENSE00002185515	17281	1.40295	0.126215	11.1156	1.05336e-28	3.76919e-27	chr11	31803398	31803673	ENSG00000007372	ENST00000638802	PAX6	PAX6-240	1	11215	10794.2	10237	27338.4	32551	25389.3
ENSE00003811456	12676.1	1.29066	0.196868	6.55597	5.52796e-11	5.14069e-10	chr11	31803398	31803471	ENSG00000007372	ENST00000530714	PAX6	PAX6-223	2	8757.01	8472.48	7947.99	20247.9	24175.4	17174
ENSE00003809577	36042.7	1.40108	0.104305	13.4326	3.89617e-41	3.77241e-39	chr11	31803584	31804267	ENSG00000007372	ENST00000638346	PAX6	PAX6-234	1	23360.7	22876.5	20098.4	60391.8	65098.2	49715.3
ENSE00003805627	11826	1.45801	0.207057	7.04161	1.90033e-12	2.11348e-11	chr11	31803584	31803726	ENSG00000007372	ENST00000379123	PAX6	PAX6-206	5	7587.09	7409.11	6930.65	18778.6	22794	18669.1
ENSE00003805627	11826	1.45801	0.207057	7.04161	1.90033e-12	2.11348e-11	chr11	31803584	31803726	ENSG00000007372	ENST00000640766	PAX6	PAX6-277	2	7587.09	7409.11	6930.65	18778.6	22794	18669.1
ENSE00003810495	6051.68	1.64867	0.296399	5.56235	2.66165e-08	2.00967e-07	chr11	31803584	31803673	ENSG00000007372	ENST00000530714	PAX6	PAX6-223	1	3546.58	3515.66	3430	9514.98	11835.4	11547.7
ENSE00001925025	19085.2	1.4236	0.121188	11.747	7.31577e-32	4.01392e-30	chr11	31803952	31804237	ENSG00000007372	ENST00000481563	PAX6	PAX6-217	1	12457.6	12306.2	10471.3	33894.3	34610.7	26026
ENSE00001892923	18179.4	1.41741	0.142179	9.96916	2.07982e-23	6.58343e-22	chr11	31803952	31804175	ENSG00000007372	ENST00000640125	PAX6	PAX6-263	1	12090.5	11890.2	10120.4	32707.2	33312.4	25074.8
ENSE00001892923	18179.4	1.41741	0.142179	9.96916	2.07982e-23	6.58343e-22	chr11	31803952	31804175	ENSG00000007372	ENST00000639548	PAX6	PAX6-257	1	12090.5	11890.2	10120.4	32707.2	33312.4	25074.8
ENSE00003801816	11751.4	1.28725	0.164981	7.80242	6.07311e-15	8.47148e-14	chr11	31803952	31804059	ENSG00000007372	ENST00000639386	PAX6	PAX6-254	1	8400.61	8173.99	6656.29	20249	20589.1	15866.4
ENSE00002152570	14.8634	2.86149	0.843684	3.39167	0.000694689	0.00272902	chr11	31804452	31804619	ENSG00000007372	ENST00000534353	PAX6	PAX6-229	1	2.90545	2.79835	9.41984	20.5655	26.0418	60.4319
ENSE00002193571	15.9689	4.44989	0.893549	4.98002	6.35781e-07	4.12006e-06	chr11	31805389	31806013	ENSG00000007372	ENST00000533156	PAX6	PAX6-227	1	0.968482	2.79835	2.35496	34.2759	60.7641	38.5363
ENSE00003807074	11.1638	3.80537	0.920829	4.13254	3.5877e-05	0.000185121	chr11	31805389	31805795	ENSG00000007372	ENST00000640766	PAX6	PAX6-277	1	0.968482	2.79835	2.35496	19.423	43.4029	22.7714
ENSE00003810697	4.4392	3.486	1.50953	2.30933	0.0209252	0.0422093	chr11	31805389	31805467	ENSG00000007372	ENST00000638853	PAX6	PAX6-241	1	0	0	2.35496	10.2828	4.96034	8.75824
ENSE00002152183	25520.9	1.68281	0.205399	8.1929	2.55005e-16	4.56238e-15	chr11	31806344	31806462	ENSG00000007372	ENST00000532175	PAX6	PAX6-225	4	15108.3	15894.6	12786.3	46199.3	47851.1	46539.5
ENSE00002152183	25520.9	1.68281	0.205399	8.1929	2.55005e-16	4.56238e-15	chr11	31806344	31806462	ENSG00000007372	ENST00000527769	PAX6	PAX6-221	3	15108.3	15894.6	12786.3	46199.3	47851.1	46539.5
ENSE00003811289	25521	1.68302	0.205515	8.18929	2.6278e-16	4.56866e-15	chr11	31806402	31806629	ENSG00000007372	ENST00000640287	PAX6	PAX6-267	1	15110.3	15892.8	12785.1	46224.4	47840	46542.2
ENSE00002194017	25514.3	1.68255	0.205468	8.18887	2.63683e-16	4.56866e-15	chr11	31806402	31806462	ENSG00000007372	ENST00000534390	PAX6	PAX6-230	2	15108.3	15892.8	12785.1	46189	47840	46525.5
ENSE00002194017	25514.3	1.68255	0.205468	8.18887	2.63683e-16	4.56866e-15	chr11	31806402	31806462	ENSG00000007372	ENST00000640172	PAX6	PAX6-264	4	15108.3	15892.8	12785.1	46189	47840	46525.5
ENSE00002194017	25514.3	1.68255	0.205468	8.18887	2.63683e-16	4.56866e-15	chr11	31806402	31806462	ENSG00000007372	ENST00000638250	PAX6	PAX6-232	3	15108.3	15892.8	12785.1	46189	47840	46525.5
ENSE00002194017	25514.3	1.68255	0.205468	8.18887	2.63683e-16	4.56866e-15	chr11	31806402	31806462	ENSG00000007372	ENST00000639054	PAX6	PAX6-249	3	15108.3	15892.8	12785.1	46189	47840	46525.5
ENSE00002194017	25514.3	1.68255	0.205468	8.18887	2.63683e-16	4.56866e-15	chr11	31806402	31806462	ENSG00000007372	ENST00000471303	PAX6	PAX6-215	3	15108.3	15892.8	12785.1	46189	47840	46525.5
ENSE00002194017	25514.3	1.68255	0.205468	8.18887	2.63683e-16	4.56866e-15	chr11	31806402	31806462	ENSG00000007372	ENST00000474783	PAX6	PAX6-216	4	15108.3	15892.8	12785.1	46189	47840	46525.5
ENSE00002194017	25514.3	1.68255	0.205468	8.18887	2.63683e-16	4.56866e-15	chr11	31806402	31806462	ENSG00000007372	ENST00000379123	PAX6	PAX6-206	4	15108.3	15892.8	12785.1	46189	47840	46525.5
ENSE00002194017	25514.3	1.68255	0.205468	8.18887	2.63683e-16	4.56866e-15	chr11	31806402	31806462	ENSG00000007372	ENST00000638913	PAX6	PAX6-243	4	15108.3	15892.8	12785.1	46189	47840	46525.5
ENSE00002523992	25514.3	1.68255	0.205468	8.18887	2.63683e-16	4.56866e-15	chr11	31806402	31806462	ENSG00000007372	ENST00000455099	PAX6	PAX6-212	4	15108.3	15892.8	12785.1	46189	47840	46525.5
ENSE00002523992	25514.3	1.68255	0.205468	8.18887	2.63683e-16	4.56866e-15	chr11	31806402	31806462	ENSG00000007372	ENST00000379115	PAX6	PAX6-205	4	15108.3	15892.8	12785.1	46189	47840	46525.5
ENSE00002523992	25514.3	1.68255	0.205468	8.18887	2.63683e-16	4.56866e-15	chr11	31806402	31806462	ENSG00000007372	ENST00000640431	PAX6	PAX6-270	4	15108.3	15892.8	12785.1	46189	47840	46525.5
ENSE00002523992	25514.3	1.68255	0.205468	8.18887	2.63683e-16	4.56866e-15	chr11	31806402	31806462	ENSG00000007372	ENST00000640613	PAX6	PAX6-273	3	15108.3	15892.8	12785.1	46189	47840	46525.5
ENSE00002523992	25514.3	1.68255	0.205468	8.18887	2.63683e-16	4.56866e-15	chr11	31806402	31806462	ENSG00000007372	ENST00000639920	PAX6	PAX6-259	3	15108.3	15892.8	12785.1	46189	47840	46525.5
ENSE00002523992	25514.3	1.68255	0.205468	8.18887	2.63683e-16	4.56866e-15	chr11	31806402	31806462	ENSG00000007372	ENST00000379132	PAX6	PAX6-208	3	15108.3	15892.8	12785.1	46189	47840	46525.5
ENSE00002523992	25514.3	1.68255	0.205468	8.18887	2.63683e-16	4.56866e-15	chr11	31806402	31806462	ENSG00000007372	ENST00000640975	PAX6	PAX6-281	4	15108.3	15892.8	12785.1	46189	47840	46525.5
ENSE00002523992	25514.3	1.68255	0.205468	8.18887	2.63683e-16	4.56866e-15	chr11	31806402	31806462	ENSG00000007372	ENST00000638914	PAX6	PAX6-244	4	15108.3	15892.8	12785.1	46189	47840	46525.5
ENSE00002523992	25514.3	1.68255	0.205468	8.18887	2.63683e-16	4.56866e-15	chr11	31806402	31806462	ENSG00000007372	ENST00000241001	PAX6	PAX6-201	4	15108.3	15892.8	12785.1	46189	47840	46525.5
ENSE00002523992	25514.3	1.68255	0.205468	8.18887	2.63683e-16	4.56866e-15	chr11	31806402	31806462	ENSG00000007372	ENST00000640963	PAX6	PAX6-280	2	15108.3	15892.8	12785.1	46189	47840	46525.5
ENSE00002523992	25514.3	1.68255	0.205468	8.18887	2.63683e-16	4.56866e-15	chr11	31806402	31806462	ENSG00000007372	ENST00000423822	PAX6	PAX6-210	4	15108.3	15892.8	12785.1	46189	47840	46525.5
ENSE00002523992	25514.3	1.68255	0.205468	8.18887	2.63683e-16	4.56866e-15	chr11	31806402	31806462	ENSG00000007372	ENST00000640684	PAX6	PAX6-275	3	15108.3	15892.8	12785.1	46189	47840	46525.5
ENSE00002523992	25514.3	1.68255	0.205468	8.18887	2.63683e-16	4.56866e-15	chr11	31806402	31806462	ENSG00000007372	ENST00000639409	PAX6	PAX6-256	4	15108.3	15892.8	12785.1	46189	47840	46525.5
ENSE00002523992	25514.3	1.68255	0.205468	8.18887	2.63683e-16	4.56866e-15	chr11	31806402	31806462	ENSG00000007372	ENST00000524853	PAX6	PAX6-219	4	15108.3	15892.8	12785.1	46189	47840	46525.5
ENSE00002523992	25514.3	1.68255	0.205468	8.18887	2.63683e-16	4.56866e-15	chr11	31806402	31806462	ENSG00000007372	ENST00000638685	PAX6	PAX6-236	3	15108.3	15892.8	12785.1	46189	47840	46525.5
ENSE00002523992	25514.3	1.68255	0.205468	8.18887	2.63683e-16	4.56866e-15	chr11	31806402	31806462	ENSG00000007372	ENST00000525535	PAX6	PAX6-220	3	15108.3	15892.8	12785.1	46189	47840	46525.5
ENSE00002523992	25514.3	1.68255	0.205468	8.18887	2.63683e-16	4.56866e-15	chr11	31806402	31806462	ENSG00000007372	ENST00000606377	PAX6	PAX6-231	3	15108.3	15892.8	12785.1	46189	47840	46525.5
ENSE00002523992	25514.3	1.68255	0.205468	8.18887	2.63683e-16	4.56866e-15	chr11	31806402	31806462	ENSG00000007372	ENST00000379109	PAX6	PAX6-203	3	15108.3	15892.8	12785.1	46189	47840	46525.5
ENSE00002523992	25514.3	1.68255	0.205468	8.18887	2.63683e-16	4.56866e-15	chr11	31806402	31806462	ENSG00000007372	ENST00000419022	PAX6	PAX6-209	4	15108.3	15892.8	12785.1	46189	47840	46525.5
ENSE00002523992	25514.3	1.68255	0.205468	8.18887	2.63683e-16	4.56866e-15	chr11	31806402	31806462	ENSG00000007372	ENST00000640335	PAX6	PAX6-268	3	15108.3	15892.8	12785.1	46189	47840	46525.5
ENSE00002523992	25514.3	1.68255	0.205468	8.18887	2.63683e-16	4.56866e-15	chr11	31806402	31806462	ENSG00000007372	ENST00000639394	PAX6	PAX6-255	3	15108.3	15892.8	12785.1	46189	47840	46525.5
ENSE00002523992	25514.3	1.68255	0.205468	8.18887	2.63683e-16	4.56866e-15	chr11	31806402	31806462	ENSG00000007372	ENST00000640368	PAX6	PAX6-269	4	15108.3	15892.8	12785.1	46189	47840	46525.5
ENSE00002523992	25514.3	1.68255	0.205468	8.18887	2.63683e-16	4.56866e-15	chr11	31806402	31806462	ENSG00000007372	ENST00000438681	PAX6	PAX6-211	4	15108.3	15892.8	12785.1	46189	47840	46525.5
ENSE00002523992	25514.3	1.68255	0.205468	8.18887	2.63683e-16	4.56866e-15	chr11	31806402	31806462	ENSG00000007372	ENST00000643871	PAX6	PAX6-282	4	15108.3	15892.8	12785.1	46189	47840	46525.5
ENSE00002523992	25514.3	1.68255	0.205468	8.18887	2.63683e-16	4.56866e-15	chr11	31806402	31806462	ENSG00000007372	ENST00000379107	PAX6	PAX6-202	3	15108.3	15892.8	12785.1	46189	47840	46525.5
ENSE00002523992	25514.3	1.68255	0.205468	8.18887	2.63683e-16	4.56866e-15	chr11	31806402	31806462	ENSG00000007372	ENST00000640460	PAX6	PAX6-271	3	15108.3	15892.8	12785.1	46189	47840	46525.5
ENSE00002523992	25514.3	1.68255	0.205468	8.18887	2.63683e-16	4.56866e-15	chr11	31806402	31806462	ENSG00000007372	ENST00000640610	PAX6	PAX6-272	4	15108.3	15892.8	12785.1	46189	47840	46525.5
ENSE00002523992	25514.3	1.68255	0.205468	8.18887	2.63683e-16	4.56866e-15	chr11	31806402	31806462	ENSG00000007372	ENST00000379129	PAX6	PAX6-207	3	15108.3	15892.8	12785.1	46189	47840	46525.5
ENSE00002523992	25514.3	1.68255	0.205468	8.18887	2.63683e-16	4.56866e-15	chr11	31806402	31806462	ENSG00000007372	ENST00000639034	PAX6	PAX6-248	4	15108.3	15892.8	12785.1	46189	47840	46525.5
ENSE00002523992	25514.3	1.68255	0.205468	8.18887	2.63683e-16	4.56866e-15	chr11	31806402	31806462	ENSG00000007372	ENST00000639943	PAX6	PAX6-260	3	15108.3	15892.8	12785.1	46189	47840	46525.5
ENSE00002523992	25514.3	1.68255	0.205468	8.18887	2.63683e-16	4.56866e-15	chr11	31806402	31806462	ENSG00000007372	ENST00000379111	PAX6	PAX6-204	4	15108.3	15892.8	12785.1	46189	47840	46525.5
ENSE00002523992	25514.3	1.68255	0.205468	8.18887	2.63683e-16	4.56866e-15	chr11	31806402	31806462	ENSG00000007372	ENST00000639916	PAX6	PAX6-258	3	15108.3	15892.8	12785.1	46189	47840	46525.5
ENSE00002523992	25514.3	1.68255	0.205468	8.18887	2.63683e-16	4.56866e-15	chr11	31806402	31806462	ENSG00000007372	ENST00000639950	PAX6	PAX6-261	4	15108.3	15892.8	12785.1	46189	47840	46525.5
ENSE00003804007	24498.6	1.69072	0.208426	8.11181	4.98708e-16	8.29164e-15	chr11	31806402	31806456	ENSG00000007372	ENST00000638963	PAX6	PAX6-245	1	14575.7	15183.9	12148.1	44165.6	46158.4	44963.9
ENSE00003811152	12087.1	1.89918	0.254585	7.45989	8.65916e-14	1.09638e-12	chr11	31806402	31806411	ENSG00000007372	ENST00000638696	PAX6	PAX6-237	1	6703.83	6677.8	5458.8	20695.8	23957.2	25624
ENSE00003811152	12087.1	1.89918	0.254585	7.45989	8.65916e-14	1.09638e-12	chr11	31806402	31806411	ENSG00000007372	ENST00000638755	PAX6	PAX6-238	1	6703.83	6677.8	5458.8	20695.8	23957.2	25624
ENSE00003805609	24478.6	1.65463	0.20301	8.15051	3.62379e-16	6.14924e-15	chr11	31806431	31806462	ENSG00000007372	ENST00000640251	PAX6	PAX6-266	4	14663.8	15515	12347.1	44664.9	45501.2	43727.3
ENSE00001098662	80220.5	1.43467	0.157717	9.09645	9.33359e-20	2.56052e-18	chr11	31806849	31806925	ENSG00000007372	ENST00000640431	PAX6	PAX6-270	3	52958.5	52680.9	43785.8	141438	142251	120242
ENSE00001098662	80220.5	1.43467	0.157717	9.09645	9.33359e-20	2.56052e-18	chr11	31806849	31806925	ENSG00000007372	ENST00000638913	PAX6	PAX6-243	3	52958.5	52680.9	43785.8	141438	142251	120242
ENSE00001098662	80220.5	1.43467	0.157717	9.09645	9.33359e-20	2.56052e-18	chr11	31806849	31806925	ENSG00000007372	ENST00000241001	PAX6	PAX6-201	3	52958.5	52680.9	43785.8	141438	142251	120242
ENSE00001098662	80220.5	1.43467	0.157717	9.09645	9.33359e-20	2.56052e-18	chr11	31806849	31806925	ENSG00000007372	ENST00000640684	PAX6	PAX6-275	2	52958.5	52680.9	43785.8	141438	142251	120242
ENSE00001098662	80220.5	1.43467	0.157717	9.09645	9.33359e-20	2.56052e-18	chr11	31806849	31806925	ENSG00000007372	ENST00000423822	PAX6	PAX6-210	3	52958.5	52680.9	43785.8	141438	142251	120242
ENSE00001098662	80220.5	1.43467	0.157717	9.09645	9.33359e-20	2.56052e-18	chr11	31806849	31806925	ENSG00000007372	ENST00000638914	PAX6	PAX6-244	3	52958.5	52680.9	43785.8	141438	142251	120242
ENSE00001098662	80220.5	1.43467	0.157717	9.09645	9.33359e-20	2.56052e-18	chr11	31806849	31806925	ENSG00000007372	ENST00000524853	PAX6	PAX6-219	3	52958.5	52680.9	43785.8	141438	142251	120242
ENSE00001098662	80220.5	1.43467	0.157717	9.09645	9.33359e-20	2.56052e-18	chr11	31806849	31806925	ENSG00000007372	ENST00000474783	PAX6	PAX6-216	3	52958.5	52680.9	43785.8	141438	142251	120242
ENSE00001098662	80220.5	1.43467	0.157717	9.09645	9.33359e-20	2.56052e-18	chr11	31806849	31806925	ENSG00000007372	ENST00000638250	PAX6	PAX6-232	2	52958.5	52680.9	43785.8	141438	142251	120242
ENSE00001098662	80220.5	1.43467	0.157717	9.09645	9.33359e-20	2.56052e-18	chr11	31806849	31806925	ENSG00000007372	ENST00000471303	PAX6	PAX6-215	2	52958.5	52680.9	43785.8	141438	142251	120242
ENSE00001098662	80220.5	1.43467	0.157717	9.09645	9.33359e-20	2.56052e-18	chr11	31806849	31806925	ENSG00000007372	ENST00000379109	PAX6	PAX6-203	2	52958.5	52680.9	43785.8	141438	142251	120242
ENSE00001098662	80220.5	1.43467	0.157717	9.09645	9.33359e-20	2.56052e-18	chr11	31806849	31806925	ENSG00000007372	ENST00000640335	PAX6	PAX6-268	2	52958.5	52680.9	43785.8	141438	142251	120242
ENSE00001098662	80220.5	1.43467	0.157717	9.09645	9.33359e-20	2.56052e-18	chr11	31806849	31806925	ENSG00000007372	ENST00000606377	PAX6	PAX6-231	2	52958.5	52680.9	43785.8	141438	142251	120242
ENSE00001098662	80220.5	1.43467	0.157717	9.09645	9.33359e-20	2.56052e-18	chr11	31806849	31806925	ENSG00000007372	ENST00000639034	PAX6	PAX6-248	3	52958.5	52680.9	43785.8	141438	142251	120242
ENSE00001098662	80220.5	1.43467	0.157717	9.09645	9.33359e-20	2.56052e-18	chr11	31806849	31806925	ENSG00000007372	ENST00000638685	PAX6	PAX6-236	2	52958.5	52680.9	43785.8	141438	142251	120242
ENSE00001098662	80220.5	1.43467	0.157717	9.09645	9.33359e-20	2.56052e-18	chr11	31806849	31806925	ENSG00000007372	ENST00000640613	PAX6	PAX6-273	2	52958.5	52680.9	43785.8	141438	142251	120242
ENSE00001098662	80220.5	1.43467	0.157717	9.09645	9.33359e-20	2.56052e-18	chr11	31806849	31806925	ENSG00000007372	ENST00000639920	PAX6	PAX6-259	2	52958.5	52680.9	43785.8	141438	142251	120242
ENSE00001098662	80220.5	1.43467	0.157717	9.09645	9.33359e-20	2.56052e-18	chr11	31806849	31806925	ENSG00000007372	ENST00000639409	PAX6	PAX6-256	3	52958.5	52680.9	43785.8	141438	142251	120242
ENSE00001098662	80220.5	1.43467	0.157717	9.09645	9.33359e-20	2.56052e-18	chr11	31806849	31806925	ENSG00000007372	ENST00000379115	PAX6	PAX6-205	3	52958.5	52680.9	43785.8	141438	142251	120242
ENSE00001098662	80220.5	1.43467	0.157717	9.09645	9.33359e-20	2.56052e-18	chr11	31806849	31806925	ENSG00000007372	ENST00000640975	PAX6	PAX6-281	3	52958.5	52680.9	43785.8	141438	142251	120242
ENSE00001098662	80220.5	1.43467	0.157717	9.09645	9.33359e-20	2.56052e-18	chr11	31806849	31806925	ENSG00000007372	ENST00000379132	PAX6	PAX6-208	2	52958.5	52680.9	43785.8	141438	142251	120242
ENSE00001098662	80220.5	1.43467	0.157717	9.09645	9.33359e-20	2.56052e-18	chr11	31806849	31806925	ENSG00000007372	ENST00000639054	PAX6	PAX6-249	2	52958.5	52680.9	43785.8	141438	142251	120242
ENSE00001098662	80220.5	1.43467	0.157717	9.09645	9.33359e-20	2.56052e-18	chr11	31806849	31806925	ENSG00000007372	ENST00000379111	PAX6	PAX6-204	3	52958.5	52680.9	43785.8	141438	142251	120242
ENSE00001098662	80220.5	1.43467	0.157717	9.09645	9.33359e-20	2.56052e-18	chr11	31806849	31806925	ENSG00000007372	ENST00000640368	PAX6	PAX6-269	3	52958.5	52680.9	43785.8	141438	142251	120242
ENSE00001098662	80220.5	1.43467	0.157717	9.09645	9.33359e-20	2.56052e-18	chr11	31806849	31806925	ENSG00000007372	ENST00000527769	PAX6	PAX6-221	2	52958.5	52680.9	43785.8	141438	142251	120242
ENSE00001098662	80220.5	1.43467	0.157717	9.09645	9.33359e-20	2.56052e-18	chr11	31806849	31806925	ENSG00000007372	ENST00000379129	PAX6	PAX6-207	2	52958.5	52680.9	43785.8	141438	142251	120242
ENSE00001098662	80220.5	1.43467	0.157717	9.09645	9.33359e-20	2.56052e-18	chr11	31806849	31806925	ENSG00000007372	ENST00000639394	PAX6	PAX6-255	2	52958.5	52680.9	43785.8	141438	142251	120242
ENSE00001098662	80220.5	1.43467	0.157717	9.09645	9.33359e-20	2.56052e-18	chr11	31806849	31806925	ENSG00000007372	ENST00000639943	PAX6	PAX6-260	2	52958.5	52680.9	43785.8	141438	142251	120242
ENSE00001098662	80220.5	1.43467	0.157717	9.09645	9.33359e-20	2.56052e-18	chr11	31806849	31806925	ENSG00000007372	ENST00000455099	PAX6	PAX6-212	3	52958.5	52680.9	43785.8	141438	142251	120242
ENSE00001098662	80220.5	1.43467	0.157717	9.09645	9.33359e-20	2.56052e-18	chr11	31806849	31806925	ENSG00000007372	ENST00000419022	PAX6	PAX6-209	3	52958.5	52680.9	43785.8	141438	142251	120242
ENSE00001098662	80220.5	1.43467	0.157717	9.09645	9.33359e-20	2.56052e-18	chr11	31806849	31806925	ENSG00000007372	ENST00000533333	PAX6	PAX6-228	3	52958.5	52680.9	43785.8	141438	142251	120242
ENSE00001098662	80220.5	1.43467	0.157717	9.09645	9.33359e-20	2.56052e-18	chr11	31806849	31806925	ENSG00000007372	ENST00000438681	PAX6	PAX6-211	3	52958.5	52680.9	43785.8	141438	142251	120242
ENSE00001098662	80220.5	1.43467	0.157717	9.09645	9.33359e-20	2.56052e-18	chr11	31806849	31806925	ENSG00000007372	ENST00000640460	PAX6	PAX6-271	2	52958.5	52680.9	43785.8	141438	142251	120242
ENSE00001098662	80220.5	1.43467	0.157717	9.09645	9.33359e-20	2.56052e-18	chr11	31806849	31806925	ENSG00000007372	ENST00000640172	PAX6	PAX6-264	3	52958.5	52680.9	43785.8	141438	142251	120242
ENSE00001098662	80220.5	1.43467	0.157717	9.09645	9.33359e-20	2.56052e-18	chr11	31806849	31806925	ENSG00000007372	ENST00000525535	PAX6	PAX6-220	2	52958.5	52680.9	43785.8	141438	142251	120242
ENSE00001098662	80220.5	1.43467	0.157717	9.09645	9.33359e-20	2.56052e-18	chr11	31806849	31806925	ENSG00000007372	ENST00000639916	PAX6	PAX6-258	2	52958.5	52680.9	43785.8	141438	142251	120242
ENSE00001098662	80220.5	1.43467	0.157717	9.09645	9.33359e-20	2.56052e-18	chr11	31806849	31806925	ENSG00000007372	ENST00000640610	PAX6	PAX6-272	3	52958.5	52680.9	43785.8	141438	142251	120242
ENSE00001098662	80220.5	1.43467	0.157717	9.09645	9.33359e-20	2.56052e-18	chr11	31806849	31806925	ENSG00000007372	ENST00000643871	PAX6	PAX6-282	3	52958.5	52680.9	43785.8	141438	142251	120242
ENSE00001098662	80220.5	1.43467	0.157717	9.09645	9.33359e-20	2.56052e-18	chr11	31806849	31806925	ENSG00000007372	ENST00000640251	PAX6	PAX6-266	3	52958.5	52680.9	43785.8	141438	142251	120242
ENSE00001098662	80220.5	1.43467	0.157717	9.09645	9.33359e-20	2.56052e-18	chr11	31806849	31806925	ENSG00000007372	ENST00000379107	PAX6	PAX6-202	2	52958.5	52680.9	43785.8	141438	142251	120242
ENSE00001098662	80220.5	1.43467	0.157717	9.09645	9.33359e-20	2.56052e-18	chr11	31806849	31806925	ENSG00000007372	ENST00000639950	PAX6	PAX6-261	3	52958.5	52680.9	43785.8	141438	142251	120242
ENSE00001098662	80220.5	1.43467	0.157717	9.09645	9.33359e-20	2.56052e-18	chr11	31806849	31806925	ENSG00000007372	ENST00000532175	PAX6	PAX6-225	3	52958.5	52680.9	43785.8	141438	142251	120242
ENSE00001098662	80220.5	1.43467	0.157717	9.09645	9.33359e-20	2.56052e-18	chr11	31806849	31806925	ENSG00000007372	ENST00000379123	PAX6	PAX6-206	3	52958.5	52680.9	43785.8	141438	142251	120242
ENSE00001700557	78654.6	1.43959	0.16203	8.88473	6.40788e-19	1.48554e-17	chr11	31806849	31806916	ENSG00000007372	ENST00000640963	PAX6	PAX6-280	1	51880.6	51350.7	42979.2	138751	140049	117794
ENSE00003802866	52175.2	1.49983	0.179344	8.36284	6.12262e-17	1.14521e-15	chr11	31806849	31806884	ENSG00000007372	ENST00000534390	PAX6	PAX6-230	1	34209.7	33047.6	27560.1	92308.3	97355.3	78494
ENSE00003802229	206.973	2.30554	0.273427	8.43201	3.39782e-17	6.57978e-16	chr11	31807290	31807619	ENSG00000007372	ENST00000639920	PAX6	PAX6-259	1	70.6992	111.934	78.8912	409.025	529.516	358.212
ENSE00003805195	206.973	2.30554	0.273427	8.43201	3.39782e-17	6.57978e-16	chr11	31807290	31807656	ENSG00000007372	ENST00000640460	PAX6	PAX6-271	1	70.6992	111.934	78.8912	409.025	529.516	358.212
ENSE00003810104	214.703	2.26584	0.293836	7.71122	1.24616e-14	1.70932e-13	chr11	31807290	31808802	ENSG00000007372	ENST00000639943	PAX6	PAX6-260	1	70.6992	129.657	78.8912	444.444	543.157	359.964
ENSE00003805246	0.138159	1.03587	4.40736	0.235031	0.814185	NA	chr11	31809305	31809401	ENSG00000007372	ENST00000640251	PAX6	PAX6-266	2	0	0	0	0	0	0.875824
ENSE00003806992	224.138	1.93348	0.438861	4.40567	1.05458e-05	6.02722e-05	chr11	31809746	31810162	ENSG00000007372	ENST00000638278	PAX6	PAX6-233	1	123.966	119.396	144.83	371.322	512.155	598.188
ENSE00001479794	552.593	1.80864	0.282145	6.41032	1.4521e-10	1.32053e-09	chr11	31809906	31810667	ENSG00000007372	ENST00000379109	PAX6	PAX6-203	1	327.347	284.499	376.794	1004.28	1155.76	1300.6
ENSE00003810557	223.747	1.93342	0.450789	4.28897	1.79507e-05	9.7837e-05	chr11	31809906	31810124	ENSG00000007372	ENST00000640335	PAX6	PAX6-268	1	123.966	119.396	144.83	371.322	512.155	598.188
ENSE00001479788	225.275	1.91398	0.45836	4.17572	2.97046e-05	0.000155218	chr11	31809906	31810305	ENSG00000007372	ENST00000379107	PAX6	PAX6-202	1	126.871	119.396	147.185	371.322	512.155	598.188
ENSE00003802336	287.663	1.56714	0.319155	4.91027	9.09512e-07	5.84788e-06	chr11	31810343	31810657	ENSG00000007372	ENST00000640617	PAX6	PAX6-274	2	195.633	154.842	221.366	530.133	601.441	561.403
ENSE00003801548	210078	1.46273	0.102184	14.3147	1.77161e-46	5.83213e-44	chr11	31810828	31810991	ENSG00000007372	ENST00000640684	PAX6	PAX6-275	1	132216	126362	112253	361715	359619	300796
ENSE00001004114	211469	1.46466	0.105419	13.8936	6.92249e-44	1.4243e-41	chr11	31810828	31811015	ENSG00000007372	ENST00000423822	PAX6	PAX6-210	2	132457	126642	112414	362705	360940	301736
ENSE00001004114	211469	1.46466	0.105419	13.8936	6.92249e-44	1.4243e-41	chr11	31810828	31811015	ENSG00000007372	ENST00000640610	PAX6	PAX6-272	2	132457	126642	112414	362705	360940	301736
ENSE00001004114	211469	1.46466	0.105419	13.8936	6.92249e-44	1.4243e-41	chr11	31810828	31811015	ENSG00000007372	ENST00000638914	PAX6	PAX6-244	2	132457	126642	112414	362705	360940	301736
ENSE00001004114	211469	1.46466	0.105419	13.8936	6.92249e-44	1.4243e-41	chr11	31810828	31811015	ENSG00000007372	ENST00000639409	PAX6	PAX6-256	2	132457	126642	112414	362705	360940	301736
ENSE00001004114	211469	1.46466	0.105419	13.8936	6.92249e-44	1.4243e-41	chr11	31810828	31811015	ENSG00000007372	ENST00000419022	PAX6	PAX6-209	2	132457	126642	112414	362705	360940	301736
ENSE00001004114	211469	1.46466	0.105419	13.8936	6.92249e-44	1.4243e-41	chr11	31810828	31811015	ENSG00000007372	ENST00000639950	PAX6	PAX6-261	2	132457	126642	112414	362705	360940	301736
ENSE00001004114	211469	1.46466	0.105419	13.8936	6.92249e-44	1.4243e-41	chr11	31810828	31811015	ENSG00000007372	ENST00000640431	PAX6	PAX6-270	2	132457	126642	112414	362705	360940	301736
ENSE00001004114	211469	1.46466	0.105419	13.8936	6.92249e-44	1.4243e-41	chr11	31810828	31811015	ENSG00000007372	ENST00000640368	PAX6	PAX6-269	2	132457	126642	112414	362705	360940	301736
ENSE00001004114	211469	1.46466	0.105419	13.8936	6.92249e-44	1.4243e-41	chr11	31810828	31811015	ENSG00000007372	ENST00000638913	PAX6	PAX6-243	2	132457	126642	112414	362705	360940	301736
ENSE00001004114	211469	1.46466	0.105419	13.8936	6.92249e-44	1.4243e-41	chr11	31810828	31811015	ENSG00000007372	ENST00000379111	PAX6	PAX6-204	2	132457	126642	112414	362705	360940	301736
ENSE00001004114	211469	1.46466	0.105419	13.8936	6.92249e-44	1.4243e-41	chr11	31810828	31811015	ENSG00000007372	ENST00000438681	PAX6	PAX6-211	2	132457	126642	112414	362705	360940	301736
ENSE00001004114	211469	1.46466	0.105419	13.8936	6.92249e-44	1.4243e-41	chr11	31810828	31811015	ENSG00000007372	ENST00000455099	PAX6	PAX6-212	2	132457	126642	112414	362705	360940	301736
ENSE00001004114	211469	1.46466	0.105419	13.8936	6.92249e-44	1.4243e-41	chr11	31810828	31811015	ENSG00000007372	ENST00000379123	PAX6	PAX6-206	2	132457	126642	112414	362705	360940	301736
ENSE00001004114	211469	1.46466	0.105419	13.8936	6.92249e-44	1.4243e-41	chr11	31810828	31811015	ENSG00000007372	ENST00000533333	PAX6	PAX6-228	2	132457	126642	112414	362705	360940	301736
ENSE00001004114	211469	1.46466	0.105419	13.8936	6.92249e-44	1.4243e-41	chr11	31810828	31811015	ENSG00000007372	ENST00000532175	PAX6	PAX6-225	2	132457	126642	112414	362705	360940	301736
ENSE00001004114	211469	1.46466	0.105419	13.8936	6.92249e-44	1.4243e-41	chr11	31810828	31811015	ENSG00000007372	ENST00000640172	PAX6	PAX6-264	2	132457	126642	112414	362705	360940	301736
ENSE00001004114	211469	1.46466	0.105419	13.8936	6.92249e-44	1.4243e-41	chr11	31810828	31811015	ENSG00000007372	ENST00000639034	PAX6	PAX6-248	2	132457	126642	112414	362705	360940	301736
ENSE00001004114	211469	1.46466	0.105419	13.8936	6.92249e-44	1.4243e-41	chr11	31810828	31811015	ENSG00000007372	ENST00000241001	PAX6	PAX6-201	2	132457	126642	112414	362705	360940	301736
ENSE00001004114	211469	1.46466	0.105419	13.8936	6.92249e-44	1.4243e-41	chr11	31810828	31811015	ENSG00000007372	ENST00000524853	PAX6	PAX6-219	2	132457	126642	112414	362705	360940	301736
ENSE00001004114	211469	1.46466	0.105419	13.8936	6.92249e-44	1.4243e-41	chr11	31810828	31811015	ENSG00000007372	ENST00000643871	PAX6	PAX6-282	2	132457	126642	112414	362705	360940	301736
ENSE00001004114	211469	1.46466	0.105419	13.8936	6.92249e-44	1.4243e-41	chr11	31810828	31811015	ENSG00000007372	ENST00000474783	PAX6	PAX6-216	2	132457	126642	112414	362705	360940	301736
ENSE00001004114	211469	1.46466	0.105419	13.8936	6.92249e-44	1.4243e-41	chr11	31810828	31811015	ENSG00000007372	ENST00000640975	PAX6	PAX6-281	2	132457	126642	112414	362705	360940	301736
ENSE00001004114	211469	1.46466	0.105419	13.8936	6.92249e-44	1.4243e-41	chr11	31810828	31811015	ENSG00000007372	ENST00000379115	PAX6	PAX6-205	2	132457	126642	112414	362705	360940	301736
ENSE00003804679	213749	1.47131	0.107158	13.7303	6.68791e-43	1.10083e-40	chr11	31810828	31811144	ENSG00000007372	ENST00000639916	PAX6	PAX6-258	1	133217	127150	112991	365310	364624	305295
ENSE00002187523	211971	1.46533	0.107179	13.6718	1.49664e-42	2.17692e-40	chr11	31810828	31811057	ENSG00000007372	ENST00000638250	PAX6	PAX6-232	1	132499	126694	112467	362993	361205	302066
ENSE00003803575	212022	1.4655	0.107278	13.6607	1.74293e-42	2.17692e-40	chr11	31810828	31811068	ENSG00000007372	ENST00000639394	PAX6	PAX6-255	1	132511	126694	112483	363052	361272	302135
ENSE00003807061	212694	1.46745	0.107444	13.6577	1.81542e-42	2.17692e-40	chr11	31810828	31811121	ENSG00000007372	ENST00000471303	PAX6	PAX6-215	1	132763	126866	112681	363915	362359	303297
ENSE00003807061	212694	1.46745	0.107444	13.6577	1.81542e-42	2.17692e-40	chr11	31810828	31811121	ENSG00000007372	ENST00000606377	PAX6	PAX6-231	1	132763	126866	112681	363915	362359	303297
ENSE00003802919	212197	1.46624	0.107368	13.6563	1.85157e-42	2.17692e-40	chr11	31810828	31811114	ENSG00000007372	ENST00000640242	PAX6	PAX6-265	1	132567	126716	112529	363294	361591	302448
ENSE00001479802	212350	1.46625	0.107564	13.6314	2.60539e-42	2.85898e-40	chr11	31810828	31811118	ENSG00000007372	ENST00000527769	PAX6	PAX6-221	1	132615	126771	112604	363465	361697	302665
ENSE00001479802	212350	1.46625	0.107564	13.6314	2.60539e-42	2.85898e-40	chr11	31810828	31811118	ENSG00000007372	ENST00000639054	PAX6	PAX6-249	1	132615	126771	112604	363465	361697	302665
ENSE00001479802	212350	1.46625	0.107564	13.6314	2.60539e-42	2.85898e-40	chr11	31810828	31811118	ENSG00000007372	ENST00000640613	PAX6	PAX6-273	1	132615	126771	112604	363465	361697	302665
ENSE00003802730	215711	1.475	0.110575	13.3394	1.36579e-40	1.18321e-38	chr11	31810828	31811270	ENSG00000007372	ENST00000640251	PAX6	PAX6-266	1	133833	127587	113518	367409	367226	307644
ENSE00003803538	180177	1.43073	0.115931	12.3412	5.43166e-35	3.57621e-33	chr11	31810828	31810924	ENSG00000007372	ENST00000640617	PAX6	PAX6-274	1	116766	113294	100162	316909	312402	260922
ENSE00003801426	202695	1.45295	0.101357	14.3351	1.32143e-46	5.43768e-44	chr11	31810871	31811015	ENSG00000007372	ENST00000639203	PAX6	PAX6-253	3	128956	123075	109201	351419	346829	290701
ENSE00003805984	191977	1.44638	0.103595	13.9618	2.66533e-44	7.31189e-42	chr11	31810901	31811015	ENSG00000007372	ENST00000640819	PAX6	PAX6-278	3	123057	117165	103519	333899	328230	274658
ENSE00003802163	72711.2	1.44371	0.161867	8.91907	4.70202e-19	1.10565e-17	chr11	31811113	31811231	ENSG00000007372	ENST00000438681	PAX6	PAX6-211	1	46483.3	42373.6	39621	122914	122006	104568
ENSE00003804963	74084.1	1.44188	0.160329	8.99321	2.40123e-19	6.02488e-18	chr11	31811115	31811331	ENSG00000007372	ENST00000640172	PAX6	PAX6-264	1	47526.3	43320.4	40221.5	125955	123403	106724
ENSE00003804963	74084.1	1.44188	0.160329	8.99321	2.40123e-19	6.02488e-18	chr11	31811115	31811331	ENSG00000007372	ENST00000639034	PAX6	PAX6-248	1	47526.3	43320.4	40221.5	125955	123403	106724
ENSE00003804963	74084.1	1.44188	0.160329	8.99321	2.40123e-19	6.02488e-18	chr11	31811115	31811331	ENSG00000007372	ENST00000643871	PAX6	PAX6-282	1	47526.3	43320.4	40221.5	125955	123403	106724
ENSE00003806403	74084.1	1.44188	0.160329	8.99321	2.40123e-19	6.02488e-18	chr11	31811115	31811328	ENSG00000007372	ENST00000474783	PAX6	PAX6-216	1	47526.3	43320.4	40221.5	125955	123403	106724
ENSE00003807426	74083.5	1.44188	0.160341	8.99254	2.41581e-19	6.02488e-18	chr11	31811115	31811322	ENSG00000007372	ENST00000640368	PAX6	PAX6-269	1	47526.3	43320.4	40221.5	125955	123403	106724
ENSE00003807426	74083.5	1.44188	0.160341	8.99254	2.41581e-19	6.02488e-18	chr11	31811115	31811322	ENSG00000007372	ENST00000379123	PAX6	PAX6-206	1	47526.3	43320.4	40221.5	125955	123403	106724
ENSE00003807426	74083.5	1.44188	0.160341	8.99254	2.41581e-19	6.02488e-18	chr11	31811115	31811322	ENSG00000007372	ENST00000379115	PAX6	PAX6-205	1	47526.3	43320.4	40221.5	125955	123403	106724
ENSE00003808082	74049.2	1.44142	0.160467	8.98268	2.64239e-19	6.49161e-18	chr11	31811115	31811251	ENSG00000007372	ENST00000639203	PAX6	PAX6-253	2	47496.3	43320.4	40221.5	125911	123333	106645
ENSE00003809284	29333.6	1.64885	0.182015	9.05887	1.31805e-19	3.50647e-18	chr11	31811213	31811341	ENSG00000007372	ENST00000638913	PAX6	PAX6-243	1	17687.4	15937.6	13829.5	51027.6	51301	46485.2
ENSE00001432138	29333.1	1.64878	0.182012	9.05865	1.32079e-19	3.50647e-18	chr11	31811213	31811331	ENSG00000007372	ENST00000640610	PAX6	PAX6-272	1	17687.4	15937.6	13829.5	51021.9	51299.8	46485.2
ENSE00001432138	29333.1	1.64878	0.182012	9.05865	1.32079e-19	3.50647e-18	chr11	31811213	31811331	ENSG00000007372	ENST00000419022	PAX6	PAX6-209	1	17687.4	15937.6	13829.5	51021.9	51299.8	46485.2
ENSE00001798875	29332.2	1.64876	0.182044	9.0569	1.34209e-19	3.50648e-18	chr11	31811213	31811308	ENSG00000007372	ENST00000533333	PAX6	PAX6-228	1	17687.4	15937.6	13829.5	51021.9	51299.8	46482.6
ENSE00003807053	2029.36	1.48671	0.264715	5.61628	1.95108e-08	1.47994e-07	chr11	31811414	31811663	ENSG00000007372	ENST00000639203	PAX6	PAX6-253	1	1222.22	1523.24	1387.07	4330.18	3195.7	4055.07
ENSE00003810426	1851.8	1.50505	0.28433	5.29331	1.20121e-07	8.41355e-07	chr11	31811528	31811689	ENSG00000007372	ENST00000455099	PAX6	PAX6-212	1	1174.77	1417.83	1184.54	3923.44	3051.85	3745.9
ENSE00003802750	1995.72	1.49496	0.299845	4.98579	6.171e-07	4.01481e-06	chr11	31811808	31811952	ENSG00000007372	ENST00000379111	PAX6	PAX6-204	1	1273.55	1566.15	1238.71	4274.2	3227.94	3993.76
ENSE00003805860	3915.36	2.08931	0.15988	13.0679	5.02058e-39	4.13194e-37	chr11	31812093	31812829	ENSG00000007372	ENST00000525535	PAX6	PAX6-220	1	1989.26	1863.7	1392.96	7603.53	7873.29	6858.58
ENSE00003807548	3915.17	2.08931	0.15998	13.0599	5.58372e-39	4.37657e-37	chr11	31812093	31812823	ENSG00000007372	ENST00000638685	PAX6	PAX6-236	1	1989.26	1863.7	1392.96	7603.53	7873.29	6858.58
ENSE00002145474	3897.25	2.08879	0.163308	12.7905	1.85265e-37	1.38612e-35	chr11	31812093	31812745	ENSG00000007372	ENST00000524853	PAX6	PAX6-219	1	1989.26	1857.17	1377.65	7572.68	7839.81	6821.79
ENSE00003712689	2681.95	2.10621	0.191112	11.0208	3.03221e-28	1.06192e-26	chr11	31812093	31812183	ENSG00000007372	ENST00000639409	PAX6	PAX6-256	1	1346.19	1253.66	1027.94	5874.88	5443.97	4308.18
ENSE00003807418	1381.19	1.99815	0.286831	6.96633	3.25326e-12	3.37987e-11	chr11	31812149	31812342	ENSG00000007372	ENST00000640975	PAX6	PAX6-281	1	798.029	784.472	425.07	2816.33	2881.96	2327.94
ENSE00003806204	1369.64	1.98426	0.290152	6.83868	7.99257e-12	7.60449e-11	chr11	31812149	31812277	ENSG00000007372	ENST00000640819	PAX6	PAX6-278	2	794.155	784.472	421.538	2801.48	2850.95	2267.51
ENSE00002192600	1009.48	1.88665	0.302934	6.22791	4.72694e-10	4.22856e-09	chr11	31812572	31813131	ENSG00000007372	ENST00000639950	PAX6	PAX6-261	1	584.963	512.099	308.5	1336.76	1758.44	2105.48
ENSE00003806841	13.7296	1.42365	2.09193	0.680542	0.496161	0.589661	chr11	31814368	31814976	ENSG00000007372	ENST00000640431	PAX6	PAX6-270	1	30.0229	0.932784	0	17.1379	31.0021	35.033
ENSE00001479873	4427.04	2.71108	0.238232	11.38	5.25933e-30	2.75126e-28	chr11	31817809	31817961	ENSG00000007372	ENST00000379129	PAX6	PAX6-207	1	1487.59	1931.8	1442.41	9856.6	11284.8	10699.1
ENSE00001479873	4427.04	2.71108	0.238232	11.38	5.25933e-30	2.75126e-28	chr11	31817809	31817961	ENSG00000007372	ENST00000638914	PAX6	PAX6-244	1	1487.59	1931.8	1442.41	9856.6	11284.8	10699.1
ENSE00001479873	4427.04	2.71108	0.238232	11.38	5.25933e-30	2.75126e-28	chr11	31817809	31817961	ENSG00000007372	ENST00000379132	PAX6	PAX6-208	1	1487.59	1931.8	1442.41	9856.6	11284.8	10699.1
ENSE00002188988	4426.85	2.71108	0.238329	11.3754	5.54679e-30	2.75126e-28	chr11	31817809	31817948	ENSG00000007372	ENST00000532175	PAX6	PAX6-225	1	1487.59	1931.8	1442.41	9856.6	11284.8	10699.1
ENSE00001919883	4426.65	2.71108	0.238426	11.3707	5.8502e-30	2.75126e-28	chr11	31817809	31817937	ENSG00000007372	ENST00000638965	PAX6	PAX6-246	1	1487.59	1931.8	1442.41	9856.6	11284.8	10699.1
ENSE00003807285	4426.65	2.71108	0.238426	11.3707	5.8502e-30	2.75126e-28	chr11	31817809	31817932	ENSG00000007372	ENST00000640819	PAX6	PAX6-278	1	1487.59	1931.8	1442.41	9856.6	11284.8	10699.1
ENSE00003810855	4426.65	2.71108	0.238426	11.3707	5.8502e-30	2.75126e-28	chr11	31817809	31817938	ENSG00000007372	ENST00000241001	PAX6	PAX6-201	1	1487.59	1931.8	1442.41	9856.6	11284.8	10699.1
ENSE00001713095	4425.06	2.71086	0.238875	11.3485	7.54843e-30	3.45131e-28	chr11	31817809	31817910	ENSG00000007372	ENST00000423822	PAX6	PAX6-210	1	1487.59	1931.8	1442.41	9855.45	11281	10699.1
ENSE00001236152	397.962	0.864525	0.418618	2.06519	0.0389051	0.0691888	chr11	85683848	85686195	ENSG00000179071	ENST00000316398	CCDC89	CCDC89-201	1	210.161	325.542	237.851	583.832	384.426	440.539
ENSE00001723057	7015.8	0.390359	0.109498	3.565	0.000363858	0.00155252	chr11	85694224	85695340	ENSG00000137501	ENST00000389960	SYTL2	SYTL2-206	19	6266.08	6216.08	5908.6	9008.84	7517.39	7581.13
ENSE00001723057	7015.8	0.390359	0.109498	3.565	0.000363858	0.00155252	chr11	85694224	85695340	ENSG00000137501	ENST00000359152	SYTL2	SYTL2-203	18	6266.08	6216.08	5908.6	9008.84	7517.39	7581.13
ENSE00003676046	7015.41	0.390359	0.109381	3.56881	0.000358613	0.00153718	chr11	85694275	85695340	ENSG00000137501	ENST00000316356	SYTL2	SYTL2-201	19	6266.08	6216.08	5908.6	9008.84	7517.39	7581.13
ENSE00003676046	7015.41	0.390359	0.109381	3.56881	0.000358613	0.00153718	chr11	85694275	85695340	ENSG00000137501	ENST00000354566	SYTL2	SYTL2-202	13	6266.08	6216.08	5908.6	9008.84	7517.39	7581.13
ENSE00003679371	7015.41	0.390359	0.109381	3.56881	0.000358613	0.00153718	chr11	85694275	85695340	ENSG00000137501	ENST00000532995	SYTL2	SYTL2-225	11	6266.08	6216.08	5908.6	9008.84	7517.39	7581.13
ENSE00003721789	7015.41	0.390359	0.109381	3.56881	0.000358613	0.00153718	chr11	85694288	85695340	ENSG00000137501	ENST00000525423	SYTL2	SYTL2-211	12	6266.08	6216.08	5908.6	9008.84	7517.39	7581.13
ENSE00003737622	7015.41	0.390359	0.109381	3.56881	0.000358613	0.00153718	chr11	85694288	85695340	ENSG00000137501	ENST00000525702	SYTL2	SYTL2-213	9	6266.08	6216.08	5908.6	9008.84	7517.39	7581.13
ENSE00002199308	7015.41	0.390359	0.109381	3.56881	0.000358613	0.00153718	chr11	85694291	85695340	ENSG00000137501	ENST00000389959	SYTL2	SYTL2-205	13	6266.08	6216.08	5908.6	9008.84	7517.39	7581.13
ENSE00003740724	6451.62	0.3676	0.105702	3.47769	0.00050576	0.0020606	chr11	85694726	85695340	ENSG00000137501	ENST00000529581	SYTL2	SYTL2-220	12	5845.76	5708.64	5650.73	8349.6	6902.31	6947.91
ENSE00003740724	6451.62	0.3676	0.105702	3.47769	0.00050576	0.0020606	chr11	85694726	85695340	ENSG00000137501	ENST00000389958	SYTL2	SYTL2-204	9	5845.76	5708.64	5650.73	8349.6	6902.31	6947.91
ENSE00003740724	6451.62	0.3676	0.105702	3.47769	0.00050576	0.0020606	chr11	85694726	85695340	ENSG00000137501	ENST00000530351	SYTL2	SYTL2-222	12	5845.76	5708.64	5650.73	8349.6	6902.31	6947.91
ENSE00002144061	6411.24	0.366339	0.104999	3.48897	0.000484892	0.00200033	chr11	85694742	85695340	ENSG00000137501	ENST00000528231	SYTL2	SYTL2-217	18	5826.39	5646.14	5621.29	8268.48	6877.51	6890.98
ENSE00002196691	5995.16	0.372433	0.0964372	3.86193	0.000112496	0.000526047	chr11	85694814	85695340	ENSG00000137501	ENST00000531496	SYTL2	SYTL2-223	4	5439.96	5287.96	5244.5	7721.21	6423.63	6533.65
ENSE00002164170	4782.85	0.451027	0.103787	4.34572	1.3882e-05	7.71953e-05	chr11	85694996	85695340	ENSG00000137501	ENST00000525692	SYTL2	SYTL2-212	2	4276.82	4008.17	4229.51	6403.87	5477.45	5227.79
ENSE00002186426	4619.06	0.450511	0.10379	4.3406	1.42093e-05	7.87493e-05	chr11	85695035	85695340	ENSG00000137501	ENST00000533892	SYTL2	SYTL2-228	11	4183.84	3864.53	4071.73	6110.24	5339.8	5113.94
ENSE00002158964	4377.62	0.453551	0.104827	4.32667	1.5138e-05	8.3057e-05	chr11	85695086	85695340	ENSG00000137501	ENST00000527523	SYTL2	SYTL2-215	19	3938.82	3603.35	3978.71	5799.48	5078.14	4899.36
ENSE00002199758	3589.36	0.464742	0.11723	3.96436	7.35937e-05	0.000358388	chr11	85695195	85695340	ENSG00000137501	ENST00000634661	SYTL2	SYTL2-230	18	3235.7	3077.26	3226.3	4786.05	4324.17	4055.94
ENSE00002199758	3589.36	0.464742	0.11723	3.96436	7.35937e-05	0.000358388	chr11	85695195	85695340	ENSG00000137501	ENST00000524452	SYTL2	SYTL2-208	18	3235.7	3077.26	3226.3	4786.05	4324.17	4055.94
ENSE00003513886	2890.55	0.459443	0.126571	3.62993	0.000283497	0.00125104	chr11	85696183	85696388	ENSG00000137501	ENST00000529662	SYTL2	SYTL2-221	4	2723.37	2422.44	2380.86	3813.76	3167.17	3369.29
ENSE00003513886	2890.55	0.459443	0.126571	3.62993	0.000283497	0.00125104	chr11	85696183	85696388	ENSG00000137501	ENST00000389959	SYTL2	SYTL2-205	12	2723.37	2422.44	2380.86	3813.76	3167.17	3369.29
ENSE00003513886	2890.55	0.459443	0.126571	3.62993	0.000283497	0.00125104	chr11	85696183	85696388	ENSG00000137501	ENST00000525423	SYTL2	SYTL2-211	11	2723.37	2422.44	2380.86	3813.76	3167.17	3369.29
ENSE00003513886	2890.55	0.459443	0.126571	3.62993	0.000283497	0.00125104	chr11	85696183	85696388	ENSG00000137501	ENST00000532995	SYTL2	SYTL2-225	10	2723.37	2422.44	2380.86	3813.76	3167.17	3369.29
ENSE00003513886	2890.55	0.459443	0.126571	3.62993	0.000283497	0.00125104	chr11	85696183	85696388	ENSG00000137501	ENST00000531496	SYTL2	SYTL2-223	3	2723.37	2422.44	2380.86	3813.76	3167.17	3369.29
ENSE00003518602	2890.55	0.459443	0.126571	3.62993	0.000283497	0.00125104	chr11	85696183	85696388	ENSG00000137501	ENST00000354566	SYTL2	SYTL2-202	12	2723.37	2422.44	2380.86	3813.76	3167.17	3369.29
ENSE00003518602	2890.55	0.459443	0.126571	3.62993	0.000283497	0.00125104	chr11	85696183	85696388	ENSG00000137501	ENST00000530351	SYTL2	SYTL2-222	11	2723.37	2422.44	2380.86	3813.76	3167.17	3369.29
ENSE00003518602	2890.55	0.459443	0.126571	3.62993	0.000283497	0.00125104	chr11	85696183	85696388	ENSG00000137501	ENST00000316356	SYTL2	SYTL2-201	18	2723.37	2422.44	2380.86	3813.76	3167.17	3369.29
ENSE00003518602	2890.55	0.459443	0.126571	3.62993	0.000283497	0.00125104	chr11	85696183	85696388	ENSG00000137501	ENST00000525702	SYTL2	SYTL2-213	8	2723.37	2422.44	2380.86	3813.76	3167.17	3369.29
ENSE00003518602	2890.55	0.459443	0.126571	3.62993	0.000283497	0.00125104	chr11	85696183	85696388	ENSG00000137501	ENST00000389958	SYTL2	SYTL2-204	8	2723.37	2422.44	2380.86	3813.76	3167.17	3369.29
ENSE00003518602	2890.55	0.459443	0.126571	3.62993	0.000283497	0.00125104	chr11	85696183	85696388	ENSG00000137501	ENST00000527523	SYTL2	SYTL2-215	18	2723.37	2422.44	2380.86	3813.76	3167.17	3369.29
ENSE00003518602	2890.55	0.459443	0.126571	3.62993	0.000283497	0.00125104	chr11	85696183	85696388	ENSG00000137501	ENST00000533892	SYTL2	SYTL2-228	10	2723.37	2422.44	2380.86	3813.76	3167.17	3369.29
ENSE00003518602	2890.55	0.459443	0.126571	3.62993	0.000283497	0.00125104	chr11	85696183	85696388	ENSG00000137501	ENST00000529581	SYTL2	SYTL2-220	11	2723.37	2422.44	2380.86	3813.76	3167.17	3369.29
ENSE00003518602	2890.55	0.459443	0.126571	3.62993	0.000283497	0.00125104	chr11	85696183	85696388	ENSG00000137501	ENST00000359152	SYTL2	SYTL2-203	17	2723.37	2422.44	2380.86	3813.76	3167.17	3369.29
ENSE00003518602	2890.55	0.459443	0.126571	3.62993	0.000283497	0.00125104	chr11	85696183	85696388	ENSG00000137501	ENST00000634661	SYTL2	SYTL2-230	17	2723.37	2422.44	2380.86	3813.76	3167.17	3369.29
ENSE00003518602	2890.55	0.459443	0.126571	3.62993	0.000283497	0.00125104	chr11	85696183	85696388	ENSG00000137501	ENST00000524452	SYTL2	SYTL2-208	17	2723.37	2422.44	2380.86	3813.76	3167.17	3369.29
ENSE00003518602	2890.55	0.459443	0.126571	3.62993	0.000283497	0.00125104	chr11	85696183	85696388	ENSG00000137501	ENST00000389960	SYTL2	SYTL2-206	18	2723.37	2422.44	2380.86	3813.76	3167.17	3369.29
ENSE00003518602	2890.55	0.459443	0.126571	3.62993	0.000283497	0.00125104	chr11	85696183	85696388	ENSG00000137501	ENST00000528231	SYTL2	SYTL2-217	17	2723.37	2422.44	2380.86	3813.76	3167.17	3369.29
ENSE00002141373	2891.88	0.459812	0.127127	3.61696	0.00029808	0.00131187	chr11	85696183	85696494	ENSG00000137501	ENST00000525692	SYTL2	SYTL2-212	1	2723.37	2422.44	2380.86	3813.76	3167.17	3371.92
ENSE00003474113	1502.16	0.465056	0.18244	2.54909	0.0108005	0.0246911	chr11	85697979	85698078	ENSG00000137501	ENST00000525423	SYTL2	SYTL2-211	10	1384.93	1390.78	1078.57	1758.35	1553.83	2008.26
ENSE00003474113	1502.16	0.465056	0.18244	2.54909	0.0108005	0.0246911	chr11	85697979	85698078	ENSG00000137501	ENST00000532995	SYTL2	SYTL2-225	9	1384.93	1390.78	1078.57	1758.35	1553.83	2008.26
ENSE00003474113	1502.16	0.465056	0.18244	2.54909	0.0108005	0.0246911	chr11	85697979	85698078	ENSG00000137501	ENST00000531496	SYTL2	SYTL2-223	2	1384.93	1390.78	1078.57	1758.35	1553.83	2008.26
ENSE00003474113	1502.16	0.465056	0.18244	2.54909	0.0108005	0.0246911	chr11	85697979	85698078	ENSG00000137501	ENST00000529662	SYTL2	SYTL2-221	3	1384.93	1390.78	1078.57	1758.35	1553.83	2008.26
ENSE00003474113	1502.16	0.465056	0.18244	2.54909	0.0108005	0.0246911	chr11	85697979	85698078	ENSG00000137501	ENST00000389959	SYTL2	SYTL2-205	11	1384.93	1390.78	1078.57	1758.35	1553.83	2008.26
ENSE00003616696	1502.16	0.465056	0.18244	2.54909	0.0108005	0.0246911	chr11	85697979	85698078	ENSG00000137501	ENST00000529581	SYTL2	SYTL2-220	10	1384.93	1390.78	1078.57	1758.35	1553.83	2008.26
ENSE00003616696	1502.16	0.465056	0.18244	2.54909	0.0108005	0.0246911	chr11	85697979	85698078	ENSG00000137501	ENST00000528231	SYTL2	SYTL2-217	16	1384.93	1390.78	1078.57	1758.35	1553.83	2008.26
ENSE00003616696	1502.16	0.465056	0.18244	2.54909	0.0108005	0.0246911	chr11	85697979	85698078	ENSG00000137501	ENST00000354566	SYTL2	SYTL2-202	11	1384.93	1390.78	1078.57	1758.35	1553.83	2008.26
ENSE00003616696	1502.16	0.465056	0.18244	2.54909	0.0108005	0.0246911	chr11	85697979	85698078	ENSG00000137501	ENST00000527523	SYTL2	SYTL2-215	17	1384.93	1390.78	1078.57	1758.35	1553.83	2008.26
ENSE00003616696	1502.16	0.465056	0.18244	2.54909	0.0108005	0.0246911	chr11	85697979	85698078	ENSG00000137501	ENST00000530351	SYTL2	SYTL2-222	10	1384.93	1390.78	1078.57	1758.35	1553.83	2008.26
ENSE00003616696	1502.16	0.465056	0.18244	2.54909	0.0108005	0.0246911	chr11	85697979	85698078	ENSG00000137501	ENST00000389958	SYTL2	SYTL2-204	7	1384.93	1390.78	1078.57	1758.35	1553.83	2008.26
ENSE00003616696	1502.16	0.465056	0.18244	2.54909	0.0108005	0.0246911	chr11	85697979	85698078	ENSG00000137501	ENST00000524452	SYTL2	SYTL2-208	16	1384.93	1390.78	1078.57	1758.35	1553.83	2008.26
ENSE00003616696	1502.16	0.465056	0.18244	2.54909	0.0108005	0.0246911	chr11	85697979	85698078	ENSG00000137501	ENST00000525702	SYTL2	SYTL2-213	7	1384.93	1390.78	1078.57	1758.35	1553.83	2008.26
ENSE00003616696	1502.16	0.465056	0.18244	2.54909	0.0108005	0.0246911	chr11	85697979	85698078	ENSG00000137501	ENST00000316356	SYTL2	SYTL2-201	17	1384.93	1390.78	1078.57	1758.35	1553.83	2008.26
ENSE00003616696	1502.16	0.465056	0.18244	2.54909	0.0108005	0.0246911	chr11	85697979	85698078	ENSG00000137501	ENST00000533892	SYTL2	SYTL2-228	9	1384.93	1390.78	1078.57	1758.35	1553.83	2008.26
ENSE00003616696	1502.16	0.465056	0.18244	2.54909	0.0108005	0.0246911	chr11	85697979	85698078	ENSG00000137501	ENST00000359152	SYTL2	SYTL2-203	16	1384.93	1390.78	1078.57	1758.35	1553.83	2008.26
ENSE00003616696	1502.16	0.465056	0.18244	2.54909	0.0108005	0.0246911	chr11	85697979	85698078	ENSG00000137501	ENST00000634661	SYTL2	SYTL2-230	16	1384.93	1390.78	1078.57	1758.35	1553.83	2008.26
ENSE00003616696	1502.16	0.465056	0.18244	2.54909	0.0108005	0.0246911	chr11	85697979	85698078	ENSG00000137501	ENST00000389960	SYTL2	SYTL2-206	17	1384.93	1390.78	1078.57	1758.35	1553.83	2008.26
ENSE00003489405	1571.74	0.648799	0.182112	3.56264	0.000367145	0.00155352	chr11	85700515	85700593	ENSG00000137501	ENST00000389958	SYTL2	SYTL2-204	6	1167.99	1406.64	1190.43	2063.41	1612.11	2226.34
ENSE00003489405	1571.74	0.648799	0.182112	3.56264	0.000367145	0.00155352	chr11	85700515	85700593	ENSG00000137501	ENST00000528231	SYTL2	SYTL2-217	15	1167.99	1406.64	1190.43	2063.41	1612.11	2226.34
ENSE00003489405	1571.74	0.648799	0.182112	3.56264	0.000367145	0.00155352	chr11	85700515	85700593	ENSG00000137501	ENST00000527523	SYTL2	SYTL2-215	16	1167.99	1406.64	1190.43	2063.41	1612.11	2226.34
ENSE00003489405	1571.74	0.648799	0.182112	3.56264	0.000367145	0.00155352	chr11	85700515	85700593	ENSG00000137501	ENST00000524452	SYTL2	SYTL2-208	15	1167.99	1406.64	1190.43	2063.41	1612.11	2226.34
ENSE00003489405	1571.74	0.648799	0.182112	3.56264	0.000367145	0.00155352	chr11	85700515	85700593	ENSG00000137501	ENST00000530351	SYTL2	SYTL2-222	9	1167.99	1406.64	1190.43	2063.41	1612.11	2226.34
ENSE00003489405	1571.74	0.648799	0.182112	3.56264	0.000367145	0.00155352	chr11	85700515	85700593	ENSG00000137501	ENST00000354566	SYTL2	SYTL2-202	10	1167.99	1406.64	1190.43	2063.41	1612.11	2226.34
ENSE00003489405	1571.74	0.648799	0.182112	3.56264	0.000367145	0.00155352	chr11	85700515	85700593	ENSG00000137501	ENST00000525702	SYTL2	SYTL2-213	6	1167.99	1406.64	1190.43	2063.41	1612.11	2226.34
ENSE00003489405	1571.74	0.648799	0.182112	3.56264	0.000367145	0.00155352	chr11	85700515	85700593	ENSG00000137501	ENST00000389960	SYTL2	SYTL2-206	16	1167.99	1406.64	1190.43	2063.41	1612.11	2226.34
ENSE00003489405	1571.74	0.648799	0.182112	3.56264	0.000367145	0.00155352	chr11	85700515	85700593	ENSG00000137501	ENST00000529581	SYTL2	SYTL2-220	9	1167.99	1406.64	1190.43	2063.41	1612.11	2226.34
ENSE00003489405	1571.74	0.648799	0.182112	3.56264	0.000367145	0.00155352	chr11	85700515	85700593	ENSG00000137501	ENST00000533892	SYTL2	SYTL2-228	8	1167.99	1406.64	1190.43	2063.41	1612.11	2226.34
ENSE00003489405	1571.74	0.648799	0.182112	3.56264	0.000367145	0.00155352	chr11	85700515	85700593	ENSG00000137501	ENST00000316356	SYTL2	SYTL2-201	16	1167.99	1406.64	1190.43	2063.41	1612.11	2226.34
ENSE00003489405	1571.74	0.648799	0.182112	3.56264	0.000367145	0.00155352	chr11	85700515	85700593	ENSG00000137501	ENST00000359152	SYTL2	SYTL2-203	15	1167.99	1406.64	1190.43	2063.41	1612.11	2226.34
ENSE00003489405	1571.74	0.648799	0.182112	3.56264	0.000367145	0.00155352	chr11	85700515	85700593	ENSG00000137501	ENST00000634661	SYTL2	SYTL2-230	15	1167.99	1406.64	1190.43	2063.41	1612.11	2226.34
ENSE00003626315	1571.74	0.648799	0.182112	3.56264	0.000367145	0.00155352	chr11	85700515	85700593	ENSG00000137501	ENST00000532995	SYTL2	SYTL2-225	8	1167.99	1406.64	1190.43	2063.41	1612.11	2226.34
ENSE00003626315	1571.74	0.648799	0.182112	3.56264	0.000367145	0.00155352	chr11	85700515	85700593	ENSG00000137501	ENST00000525423	SYTL2	SYTL2-211	9	1167.99	1406.64	1190.43	2063.41	1612.11	2226.34
ENSE00003626315	1571.74	0.648799	0.182112	3.56264	0.000367145	0.00155352	chr11	85700515	85700593	ENSG00000137501	ENST00000529662	SYTL2	SYTL2-221	2	1167.99	1406.64	1190.43	2063.41	1612.11	2226.34
ENSE00003626315	1571.74	0.648799	0.182112	3.56264	0.000367145	0.00155352	chr11	85700515	85700593	ENSG00000137501	ENST00000389959	SYTL2	SYTL2-205	10	1167.99	1406.64	1190.43	2063.41	1612.11	2226.34
ENSE00002186490	1573.08	0.643975	0.182404	3.53048	0.000414807	0.00172963	chr11	85700515	85700623	ENSG00000137501	ENST00000531496	SYTL2	SYTL2-223	1	1174.77	1413.17	1190.43	2064.55	1612.11	2226.34
ENSE00002183610	2546.17	0.417276	0.1368	3.05025	0.00228648	0.00693102	chr11	85704858	85705255	ENSG00000137501	ENST00000529662	SYTL2	SYTL2-221	1	2410.55	2432.7	1986.41	3250.49	2641.38	3229.16
ENSE00003660328	2536.3	0.421961	0.140615	3.00082	0.00269254	0.00798545	chr11	85704858	85705028	ENSG00000137501	ENST00000389959	SYTL2	SYTL2-205	9	2410.55	2415.91	1975.81	3250.49	2641.38	3222.16
ENSE00003660328	2536.3	0.421961	0.140615	3.00082	0.00269254	0.00798545	chr11	85704858	85705028	ENSG00000137501	ENST00000532995	SYTL2	SYTL2-225	7	2410.55	2415.91	1975.81	3250.49	2641.38	3222.16
ENSE00003660328	2536.3	0.421961	0.140615	3.00082	0.00269254	0.00798545	chr11	85704858	85705028	ENSG00000137501	ENST00000525423	SYTL2	SYTL2-211	8	2410.55	2415.91	1975.81	3250.49	2641.38	3222.16
ENSE00003788238	2536.3	0.421961	0.140615	3.00082	0.00269254	0.00798545	chr11	85704858	85705028	ENSG00000137501	ENST00000316356	SYTL2	SYTL2-201	15	2410.55	2415.91	1975.81	3250.49	2641.38	3222.16
ENSE00003788238	2536.3	0.421961	0.140615	3.00082	0.00269254	0.00798545	chr11	85704858	85705028	ENSG00000137501	ENST00000524452	SYTL2	SYTL2-208	14	2410.55	2415.91	1975.81	3250.49	2641.38	3222.16
ENSE00003788238	2536.3	0.421961	0.140615	3.00082	0.00269254	0.00798545	chr11	85704858	85705028	ENSG00000137501	ENST00000530351	SYTL2	SYTL2-222	8	2410.55	2415.91	1975.81	3250.49	2641.38	3222.16
ENSE00003788238	2536.3	0.421961	0.140615	3.00082	0.00269254	0.00798545	chr11	85704858	85705028	ENSG00000137501	ENST00000528231	SYTL2	SYTL2-217	14	2410.55	2415.91	1975.81	3250.49	2641.38	3222.16
ENSE00003788238	2536.3	0.421961	0.140615	3.00082	0.00269254	0.00798545	chr11	85704858	85705028	ENSG00000137501	ENST00000533892	SYTL2	SYTL2-228	7	2410.55	2415.91	1975.81	3250.49	2641.38	3222.16
ENSE00003788238	2536.3	0.421961	0.140615	3.00082	0.00269254	0.00798545	chr11	85704858	85705028	ENSG00000137501	ENST00000389958	SYTL2	SYTL2-204	5	2410.55	2415.91	1975.81	3250.49	2641.38	3222.16
ENSE00003788238	2536.3	0.421961	0.140615	3.00082	0.00269254	0.00798545	chr11	85704858	85705028	ENSG00000137501	ENST00000529581	SYTL2	SYTL2-220	8	2410.55	2415.91	1975.81	3250.49	2641.38	3222.16
ENSE00003788238	2536.3	0.421961	0.140615	3.00082	0.00269254	0.00798545	chr11	85704858	85705028	ENSG00000137501	ENST00000527523	SYTL2	SYTL2-215	15	2410.55	2415.91	1975.81	3250.49	2641.38	3222.16
ENSE00003788238	2536.3	0.421961	0.140615	3.00082	0.00269254	0.00798545	chr11	85704858	85705028	ENSG00000137501	ENST00000389960	SYTL2	SYTL2-206	15	2410.55	2415.91	1975.81	3250.49	2641.38	3222.16
ENSE00003788238	2536.3	0.421961	0.140615	3.00082	0.00269254	0.00798545	chr11	85704858	85705028	ENSG00000137501	ENST00000359152	SYTL2	SYTL2-203	14	2410.55	2415.91	1975.81	3250.49	2641.38	3222.16
ENSE00003788238	2536.3	0.421961	0.140615	3.00082	0.00269254	0.00798545	chr11	85704858	85705028	ENSG00000137501	ENST00000525702	SYTL2	SYTL2-213	5	2410.55	2415.91	1975.81	3250.49	2641.38	3222.16
ENSE00003788238	2536.3	0.421961	0.140615	3.00082	0.00269254	0.00798545	chr11	85704858	85705028	ENSG00000137501	ENST00000634661	SYTL2	SYTL2-230	14	2410.55	2415.91	1975.81	3250.49	2641.38	3222.16
ENSE00003788238	2536.3	0.421961	0.140615	3.00082	0.00269254	0.00798545	chr11	85704858	85705028	ENSG00000137501	ENST00000527794	SYTL2	SYTL2-216	7	2410.55	2415.91	1975.81	3250.49	2641.38	3222.16
ENSE00003788238	2536.3	0.421961	0.140615	3.00082	0.00269254	0.00798545	chr11	85704858	85705028	ENSG00000137501	ENST00000533057	SYTL2	SYTL2-226	6	2410.55	2415.91	1975.81	3250.49	2641.38	3222.16
ENSE00003788238	2536.3	0.421961	0.140615	3.00082	0.00269254	0.00798545	chr11	85704858	85705028	ENSG00000137501	ENST00000354566	SYTL2	SYTL2-202	9	2410.55	2415.91	1975.81	3250.49	2641.38	3222.16
ENSE00002186286	1508.8	0.352188	0.161614	2.1792	0.0293168	0.0540375	chr11	85704992	85705028	ENSG00000137501	ENST00000529534	SYTL2	SYTL2-219	6	1479.84	1540.96	1272.86	1933.16	1770.84	1778.8
ENSE00003613127	2566.9	0.478712	0.0834526	5.73634	9.67449e-09	7.51142e-08	chr11	85707429	85707531	ENSG00000137501	ENST00000389959	SYTL2	SYTL2-205	8	2285.62	2271.33	2031.15	3363.6	2903.04	2920
ENSE00003613127	2566.9	0.478712	0.0834526	5.73634	9.67449e-09	7.51142e-08	chr11	85707429	85707531	ENSG00000137501	ENST00000532995	SYTL2	SYTL2-225	6	2285.62	2271.33	2031.15	3363.6	2903.04	2920
ENSE00003613127	2566.9	0.478712	0.0834526	5.73634	9.67449e-09	7.51142e-08	chr11	85707429	85707531	ENSG00000137501	ENST00000525423	SYTL2	SYTL2-211	7	2285.62	2271.33	2031.15	3363.6	2903.04	2920
ENSE00003646842	2566.9	0.478712	0.0834526	5.73634	9.67449e-09	7.51142e-08	chr11	85707429	85707531	ENSG00000137501	ENST00000533057	SYTL2	SYTL2-226	5	2285.62	2271.33	2031.15	3363.6	2903.04	2920
ENSE00003646842	2566.9	0.478712	0.0834526	5.73634	9.67449e-09	7.51142e-08	chr11	85707429	85707531	ENSG00000137501	ENST00000524452	SYTL2	SYTL2-208	13	2285.62	2271.33	2031.15	3363.6	2903.04	2920
ENSE00003646842	2566.9	0.478712	0.0834526	5.73634	9.67449e-09	7.51142e-08	chr11	85707429	85707531	ENSG00000137501	ENST00000529581	SYTL2	SYTL2-220	7	2285.62	2271.33	2031.15	3363.6	2903.04	2920
ENSE00003646842	2566.9	0.478712	0.0834526	5.73634	9.67449e-09	7.51142e-08	chr11	85707429	85707531	ENSG00000137501	ENST00000359152	SYTL2	SYTL2-203	13	2285.62	2271.33	2031.15	3363.6	2903.04	2920
ENSE00003646842	2566.9	0.478712	0.0834526	5.73634	9.67449e-09	7.51142e-08	chr11	85707429	85707531	ENSG00000137501	ENST00000389958	SYTL2	SYTL2-204	4	2285.62	2271.33	2031.15	3363.6	2903.04	2920
ENSE00003646842	2566.9	0.478712	0.0834526	5.73634	9.67449e-09	7.51142e-08	chr11	85707429	85707531	ENSG00000137501	ENST00000634661	SYTL2	SYTL2-230	13	2285.62	2271.33	2031.15	3363.6	2903.04	2920
ENSE00003646842	2566.9	0.478712	0.0834526	5.73634	9.67449e-09	7.51142e-08	chr11	85707429	85707531	ENSG00000137501	ENST00000530351	SYTL2	SYTL2-222	7	2285.62	2271.33	2031.15	3363.6	2903.04	2920
ENSE00003646842	2566.9	0.478712	0.0834526	5.73634	9.67449e-09	7.51142e-08	chr11	85707429	85707531	ENSG00000137501	ENST00000527794	SYTL2	SYTL2-216	6	2285.62	2271.33	2031.15	3363.6	2903.04	2920
ENSE00003646842	2566.9	0.478712	0.0834526	5.73634	9.67449e-09	7.51142e-08	chr11	85707429	85707531	ENSG00000137501	ENST00000316356	SYTL2	SYTL2-201	14	2285.62	2271.33	2031.15	3363.6	2903.04	2920
ENSE00003646842	2566.9	0.478712	0.0834526	5.73634	9.67449e-09	7.51142e-08	chr11	85707429	85707531	ENSG00000137501	ENST00000389960	SYTL2	SYTL2-206	14	2285.62	2271.33	2031.15	3363.6	2903.04	2920
ENSE00003646842	2566.9	0.478712	0.0834526	5.73634	9.67449e-09	7.51142e-08	chr11	85707429	85707531	ENSG00000137501	ENST00000527523	SYTL2	SYTL2-215	14	2285.62	2271.33	2031.15	3363.6	2903.04	2920
ENSE00003646842	2566.9	0.478712	0.0834526	5.73634	9.67449e-09	7.51142e-08	chr11	85707429	85707531	ENSG00000137501	ENST00000525702	SYTL2	SYTL2-213	4	2285.62	2271.33	2031.15	3363.6	2903.04	2920
ENSE00003646842	2566.9	0.478712	0.0834526	5.73634	9.67449e-09	7.51142e-08	chr11	85707429	85707531	ENSG00000137501	ENST00000528231	SYTL2	SYTL2-217	13	2285.62	2271.33	2031.15	3363.6	2903.04	2920
ENSE00003646842	2566.9	0.478712	0.0834526	5.73634	9.67449e-09	7.51142e-08	chr11	85707429	85707531	ENSG00000137501	ENST00000529534	SYTL2	SYTL2-219	5	2285.62	2271.33	2031.15	3363.6	2903.04	2920
ENSE00003646842	2566.9	0.478712	0.0834526	5.73634	9.67449e-09	7.51142e-08	chr11	85707429	85707531	ENSG00000137501	ENST00000533892	SYTL2	SYTL2-228	6	2285.62	2271.33	2031.15	3363.6	2903.04	2920
ENSE00003646842	2566.9	0.478712	0.0834526	5.73634	9.67449e-09	7.51142e-08	chr11	85707429	85707531	ENSG00000137501	ENST00000354566	SYTL2	SYTL2-202	8	2285.62	2271.33	2031.15	3363.6	2903.04	2920
ENSE00002148660	64.9221	0.17464	1.03957	0.167993	0.866589	0.899829	chr11	85708038	85708150	ENSG00000137501	ENST00000532995	SYTL2	SYTL2-225	5	31.9599	75.5555	47.0992	113.11	0	61.3077
ENSE00003580118	3132.88	0.66006	0.111362	5.92716	3.08227e-09	2.51159e-08	chr11	85709331	85709500	ENSG00000137501	ENST00000389959	SYTL2	SYTL2-205	7	2563.57	2557.69	2389.11	4358.75	3727.69	3783.56
ENSE00003580118	3132.88	0.66006	0.111362	5.92716	3.08227e-09	2.51159e-08	chr11	85709331	85709500	ENSG00000137501	ENST00000525423	SYTL2	SYTL2-211	6	2563.57	2557.69	2389.11	4358.75	3727.69	3783.56
ENSE00003693765	3132.88	0.66006	0.111362	5.92716	3.08227e-09	2.51159e-08	chr11	85709331	85709500	ENSG00000137501	ENST00000527794	SYTL2	SYTL2-216	5	2563.57	2557.69	2389.11	4358.75	3727.69	3783.56
ENSE00003693765	3132.88	0.66006	0.111362	5.92716	3.08227e-09	2.51159e-08	chr11	85709331	85709500	ENSG00000137501	ENST00000524452	SYTL2	SYTL2-208	12	2563.57	2557.69	2389.11	4358.75	3727.69	3783.56
ENSE00003693765	3132.88	0.66006	0.111362	5.92716	3.08227e-09	2.51159e-08	chr11	85709331	85709500	ENSG00000137501	ENST00000533892	SYTL2	SYTL2-228	5	2563.57	2557.69	2389.11	4358.75	3727.69	3783.56
ENSE00003693765	3132.88	0.66006	0.111362	5.92716	3.08227e-09	2.51159e-08	chr11	85709331	85709500	ENSG00000137501	ENST00000354566	SYTL2	SYTL2-202	7	2563.57	2557.69	2389.11	4358.75	3727.69	3783.56
ENSE00003693765	3132.88	0.66006	0.111362	5.92716	3.08227e-09	2.51159e-08	chr11	85709331	85709500	ENSG00000137501	ENST00000529534	SYTL2	SYTL2-219	4	2563.57	2557.69	2389.11	4358.75	3727.69	3783.56
ENSE00003693765	3132.88	0.66006	0.111362	5.92716	3.08227e-09	2.51159e-08	chr11	85709331	85709500	ENSG00000137501	ENST00000529581	SYTL2	SYTL2-220	6	2563.57	2557.69	2389.11	4358.75	3727.69	3783.56
ENSE00003693765	3132.88	0.66006	0.111362	5.92716	3.08227e-09	2.51159e-08	chr11	85709331	85709500	ENSG00000137501	ENST00000389958	SYTL2	SYTL2-204	3	2563.57	2557.69	2389.11	4358.75	3727.69	3783.56
ENSE00003693765	3132.88	0.66006	0.111362	5.92716	3.08227e-09	2.51159e-08	chr11	85709331	85709500	ENSG00000137501	ENST00000527523	SYTL2	SYTL2-215	13	2563.57	2557.69	2389.11	4358.75	3727.69	3783.56
ENSE00003693765	3132.88	0.66006	0.111362	5.92716	3.08227e-09	2.51159e-08	chr11	85709331	85709500	ENSG00000137501	ENST00000389960	SYTL2	SYTL2-206	13	2563.57	2557.69	2389.11	4358.75	3727.69	3783.56
ENSE00003693765	3132.88	0.66006	0.111362	5.92716	3.08227e-09	2.51159e-08	chr11	85709331	85709500	ENSG00000137501	ENST00000528231	SYTL2	SYTL2-217	12	2563.57	2557.69	2389.11	4358.75	3727.69	3783.56
ENSE00003693765	3132.88	0.66006	0.111362	5.92716	3.08227e-09	2.51159e-08	chr11	85709331	85709500	ENSG00000137501	ENST00000532995	SYTL2	SYTL2-225	4	2563.57	2557.69	2389.11	4358.75	3727.69	3783.56
ENSE00003693765	3132.88	0.66006	0.111362	5.92716	3.08227e-09	2.51159e-08	chr11	85709331	85709500	ENSG00000137501	ENST00000359152	SYTL2	SYTL2-203	12	2563.57	2557.69	2389.11	4358.75	3727.69	3783.56
ENSE00003693765	3132.88	0.66006	0.111362	5.92716	3.08227e-09	2.51159e-08	chr11	85709331	85709500	ENSG00000137501	ENST00000525702	SYTL2	SYTL2-213	3	2563.57	2557.69	2389.11	4358.75	3727.69	3783.56
ENSE00003693765	3132.88	0.66006	0.111362	5.92716	3.08227e-09	2.51159e-08	chr11	85709331	85709500	ENSG00000137501	ENST00000530351	SYTL2	SYTL2-222	6	2563.57	2557.69	2389.11	4358.75	3727.69	3783.56
ENSE00003693765	3132.88	0.66006	0.111362	5.92716	3.08227e-09	2.51159e-08	chr11	85709331	85709500	ENSG00000137501	ENST00000634661	SYTL2	SYTL2-230	12	2563.57	2557.69	2389.11	4358.75	3727.69	3783.56
ENSE00003693765	3132.88	0.66006	0.111362	5.92716	3.08227e-09	2.51159e-08	chr11	85709331	85709500	ENSG00000137501	ENST00000316356	SYTL2	SYTL2-201	13	2563.57	2557.69	2389.11	4358.75	3727.69	3783.56
ENSE00002151546	2012.77	0.627321	0.14789	4.24181	2.21726e-05	0.000118494	chr11	85709331	85709377	ENSG00000137501	ENST00000533057	SYTL2	SYTL2-226	4	1745.2	1743.37	1588.42	2911.16	2473.97	2459.31
ENSE00002144645	3052.01	0.657534	0.106723	6.1611	7.2241e-10	6.39294e-09	chr11	85709347	85709500	ENSG00000137501	ENST00000526999	SYTL2	SYTL2-214	5	2487.06	2495.2	2358.49	4221.64	3628.49	3731.01
ENSE00002148809	1759.38	0.629259	0.13135	4.79072	1.66188e-06	1.0521e-05	chr11	85709448	85709500	ENSG00000137501	ENST00000532221	SYTL2	SYTL2-224	4	1400.42	1494.32	1376.47	2513.56	2034.98	2059.94
ENSE00002166422	1583.22	0.662994	0.132244	5.01341	5.34726e-07	3.52064e-06	chr11	85709467	85709500	ENSG00000137501	ENST00000524911	SYTL2	SYTL2-210	6	1253.22	1299.37	1274.03	2319.33	1894.85	1846.24
ENSE00003671445	2101.91	0.690863	0.151111	4.57189	4.83334e-06	2.89297e-05	chr11	85711113	85711232	ENSG00000137501	ENST00000525423	SYTL2	SYTL2-211	5	1560.22	1956.05	1523.66	3099.68	2285.47	2751.84
ENSE00003671445	2101.91	0.690863	0.151111	4.57189	4.83334e-06	2.89297e-05	chr11	85711113	85711232	ENSG00000137501	ENST00000389959	SYTL2	SYTL2-205	6	1560.22	1956.05	1523.66	3099.68	2285.47	2751.84
ENSE00003683946	2101.91	0.690863	0.151111	4.57189	4.83334e-06	2.89297e-05	chr11	85711113	85711232	ENSG00000137501	ENST00000528231	SYTL2	SYTL2-217	11	1560.22	1956.05	1523.66	3099.68	2285.47	2751.84
ENSE00003683946	2101.91	0.690863	0.151111	4.57189	4.83334e-06	2.89297e-05	chr11	85711113	85711232	ENSG00000137501	ENST00000529581	SYTL2	SYTL2-220	5	1560.22	1956.05	1523.66	3099.68	2285.47	2751.84
ENSE00003683946	2101.91	0.690863	0.151111	4.57189	4.83334e-06	2.89297e-05	chr11	85711113	85711232	ENSG00000137501	ENST00000389958	SYTL2	SYTL2-204	2	1560.22	1956.05	1523.66	3099.68	2285.47	2751.84
ENSE00003683946	2101.91	0.690863	0.151111	4.57189	4.83334e-06	2.89297e-05	chr11	85711113	85711232	ENSG00000137501	ENST00000634661	SYTL2	SYTL2-230	11	1560.22	1956.05	1523.66	3099.68	2285.47	2751.84
ENSE00003683946	2101.91	0.690863	0.151111	4.57189	4.83334e-06	2.89297e-05	chr11	85711113	85711232	ENSG00000137501	ENST00000524911	SYTL2	SYTL2-210	5	1560.22	1956.05	1523.66	3099.68	2285.47	2751.84
ENSE00003683946	2101.91	0.690863	0.151111	4.57189	4.83334e-06	2.89297e-05	chr11	85711113	85711232	ENSG00000137501	ENST00000354566	SYTL2	SYTL2-202	6	1560.22	1956.05	1523.66	3099.68	2285.47	2751.84
ENSE00003683946	2101.91	0.690863	0.151111	4.57189	4.83334e-06	2.89297e-05	chr11	85711113	85711232	ENSG00000137501	ENST00000529534	SYTL2	SYTL2-219	3	1560.22	1956.05	1523.66	3099.68	2285.47	2751.84
ENSE00003683946	2101.91	0.690863	0.151111	4.57189	4.83334e-06	2.89297e-05	chr11	85711113	85711232	ENSG00000137501	ENST00000526999	SYTL2	SYTL2-214	4	1560.22	1956.05	1523.66	3099.68	2285.47	2751.84
ENSE00003683946	2101.91	0.690863	0.151111	4.57189	4.83334e-06	2.89297e-05	chr11	85711113	85711232	ENSG00000137501	ENST00000525702	SYTL2	SYTL2-213	2	1560.22	1956.05	1523.66	3099.68	2285.47	2751.84
ENSE00003683946	2101.91	0.690863	0.151111	4.57189	4.83334e-06	2.89297e-05	chr11	85711113	85711232	ENSG00000137501	ENST00000359152	SYTL2	SYTL2-203	11	1560.22	1956.05	1523.66	3099.68	2285.47	2751.84
ENSE00003683946	2101.91	0.690863	0.151111	4.57189	4.83334e-06	2.89297e-05	chr11	85711113	85711232	ENSG00000137501	ENST00000316356	SYTL2	SYTL2-201	12	1560.22	1956.05	1523.66	3099.68	2285.47	2751.84
ENSE00003683946	2101.91	0.690863	0.151111	4.57189	4.83334e-06	2.89297e-05	chr11	85711113	85711232	ENSG00000137501	ENST00000532221	SYTL2	SYTL2-224	3	1560.22	1956.05	1523.66	3099.68	2285.47	2751.84
ENSE00003683946	2101.91	0.690863	0.151111	4.57189	4.83334e-06	2.89297e-05	chr11	85711113	85711232	ENSG00000137501	ENST00000527523	SYTL2	SYTL2-215	12	1560.22	1956.05	1523.66	3099.68	2285.47	2751.84
ENSE00002186977	1393.43	0.811801	0.101393	8.0065	1.1802e-15	1.90452e-14	chr11	85714413	85715137	ENSG00000137501	ENST00000525702	SYTL2	SYTL2-213	1	1052.74	1108.15	1042.07	1991.43	1754.72	1876.89
ENSE00003491736	1380.32	0.805965	0.11405	7.06675	1.586e-12	1.77588e-11	chr11	85714413	85714507	ENSG00000137501	ENST00000316356	SYTL2	SYTL2-201	11	1048.87	1094.16	1042.07	1978.86	1712.56	1876.89
ENSE00003491736	1380.32	0.805965	0.11405	7.06675	1.586e-12	1.77588e-11	chr11	85714413	85714507	ENSG00000137501	ENST00000528231	SYTL2	SYTL2-217	10	1048.87	1094.16	1042.07	1978.86	1712.56	1876.89
ENSE00003491736	1380.32	0.805965	0.11405	7.06675	1.586e-12	1.77588e-11	chr11	85714413	85714507	ENSG00000137501	ENST00000524452	SYTL2	SYTL2-208	11	1048.87	1094.16	1042.07	1978.86	1712.56	1876.89
ENSE00003491736	1380.32	0.805965	0.11405	7.06675	1.586e-12	1.77588e-11	chr11	85714413	85714507	ENSG00000137501	ENST00000527523	SYTL2	SYTL2-215	11	1048.87	1094.16	1042.07	1978.86	1712.56	1876.89
ENSE00003491736	1380.32	0.805965	0.11405	7.06675	1.586e-12	1.77588e-11	chr11	85714413	85714507	ENSG00000137501	ENST00000354566	SYTL2	SYTL2-202	5	1048.87	1094.16	1042.07	1978.86	1712.56	1876.89
ENSE00003491736	1380.32	0.805965	0.11405	7.06675	1.586e-12	1.77588e-11	chr11	85714413	85714507	ENSG00000137501	ENST00000634661	SYTL2	SYTL2-230	10	1048.87	1094.16	1042.07	1978.86	1712.56	1876.89
ENSE00003491736	1380.32	0.805965	0.11405	7.06675	1.586e-12	1.77588e-11	chr11	85714413	85714507	ENSG00000137501	ENST00000389960	SYTL2	SYTL2-206	12	1048.87	1094.16	1042.07	1978.86	1712.56	1876.89
ENSE00003491736	1380.32	0.805965	0.11405	7.06675	1.586e-12	1.77588e-11	chr11	85714413	85714507	ENSG00000137501	ENST00000359152	SYTL2	SYTL2-203	10	1048.87	1094.16	1042.07	1978.86	1712.56	1876.89
ENSE00003491736	1380.32	0.805965	0.11405	7.06675	1.586e-12	1.77588e-11	chr11	85714413	85714507	ENSG00000137501	ENST00000530351	SYTL2	SYTL2-222	5	1048.87	1094.16	1042.07	1978.86	1712.56	1876.89
ENSE00003542943	1380.32	0.805965	0.11405	7.06675	1.586e-12	1.77588e-11	chr11	85714413	85714507	ENSG00000137501	ENST00000532995	SYTL2	SYTL2-225	3	1048.87	1094.16	1042.07	1978.86	1712.56	1876.89
ENSE00003542943	1380.32	0.805965	0.11405	7.06675	1.586e-12	1.77588e-11	chr11	85714413	85714507	ENSG00000137501	ENST00000527794	SYTL2	SYTL2-216	4	1048.87	1094.16	1042.07	1978.86	1712.56	1876.89
ENSE00003542943	1380.32	0.805965	0.11405	7.06675	1.586e-12	1.77588e-11	chr11	85714413	85714507	ENSG00000137501	ENST00000529534	SYTL2	SYTL2-219	2	1048.87	1094.16	1042.07	1978.86	1712.56	1876.89
ENSE00003542943	1380.32	0.805965	0.11405	7.06675	1.586e-12	1.77588e-11	chr11	85714413	85714507	ENSG00000137501	ENST00000532221	SYTL2	SYTL2-224	2	1048.87	1094.16	1042.07	1978.86	1712.56	1876.89
ENSE00003542943	1380.32	0.805965	0.11405	7.06675	1.586e-12	1.77588e-11	chr11	85714413	85714507	ENSG00000137501	ENST00000526999	SYTL2	SYTL2-214	3	1048.87	1094.16	1042.07	1978.86	1712.56	1876.89
ENSE00003542943	1380.32	0.805965	0.11405	7.06675	1.586e-12	1.77588e-11	chr11	85714413	85714507	ENSG00000137501	ENST00000533892	SYTL2	SYTL2-228	4	1048.87	1094.16	1042.07	1978.86	1712.56	1876.89
ENSE00003542943	1380.32	0.805965	0.11405	7.06675	1.586e-12	1.77588e-11	chr11	85714413	85714507	ENSG00000137501	ENST00000524911	SYTL2	SYTL2-210	4	1048.87	1094.16	1042.07	1978.86	1712.56	1876.89
ENSE00003542943	1380.32	0.805965	0.11405	7.06675	1.586e-12	1.77588e-11	chr11	85714413	85714507	ENSG00000137501	ENST00000529581	SYTL2	SYTL2-220	4	1048.87	1094.16	1042.07	1978.86	1712.56	1876.89
ENSE00003644734	1380.32	0.805965	0.11405	7.06675	1.586e-12	1.77588e-11	chr11	85714413	85714507	ENSG00000137501	ENST00000389959	SYTL2	SYTL2-205	5	1048.87	1094.16	1042.07	1978.86	1712.56	1876.89
ENSE00003644734	1380.32	0.805965	0.11405	7.06675	1.586e-12	1.77588e-11	chr11	85714413	85714507	ENSG00000137501	ENST00000525423	SYTL2	SYTL2-211	4	1048.87	1094.16	1042.07	1978.86	1712.56	1876.89
ENSE00002148010	1147.07	0.806472	0.165287	4.87923	1.06501e-06	6.82102e-06	chr11	85714413	85714449	ENSG00000137501	ENST00000533057	SYTL2	SYTL2-226	3	844.516	925.322	946.694	1725.22	1531.5	1494.16
ENSE00002194775	1337.95	0.791684	0.110504	7.16432	7.81741e-13	9.06159e-12	chr11	85714428	85714507	ENSG00000137501	ENST00000533577	SYTL2	SYTL2-227	4	1010.13	1078.3	1019.7	1837.19	1712.56	1830.47
ENSE00002198884	1286.67	0.753707	0.126395	5.96311	2.47488e-09	2.1107e-08	chr11	85714436	85714507	ENSG00000137501	ENST00000534554	SYTL2	SYTL2-229	3	959.765	1066.17	1019.7	1740.07	1657.99	1736.76
ENSE00002167302	953.982	0.684987	0.168966	4.05399	5.03519e-05	0.000254231	chr11	85714479	85714507	ENSG00000137501	ENST00000528566	SYTL2	SYTL2-218	3	775.754	779.808	684.116	1222.51	1121.04	1257.68
ENSE00002200099	3.28061	-1.96717	4.2442	-0.463497	0.643008	0.720975	chr11	85716281	85716428	ENSG00000137501	ENST00000528566	SYTL2	SYTL2-218	2	0	0	2.35496	0	0	0
ENSE00002198298	3.28061	-1.96717	4.2442	-0.463497	0.643008	0.720975	chr11	85716343	85716431	ENSG00000137501	ENST00000534554	SYTL2	SYTL2-229	2	0	0	2.35496	0	0	0
ENSE00002158361	3.28061	-1.96717	4.2442	-0.463497	0.643008	0.720975	chr11	85716347	85716428	ENSG00000137501	ENST00000524911	SYTL2	SYTL2-210	3	0	0	2.35496	0	0	0
ENSE00002200876	3.28061	-1.96717	4.2442	-0.463497	0.643008	0.720975	chr11	85716347	85716661	ENSG00000137501	ENST00000532221	SYTL2	SYTL2-224	1	0	0	2.35496	0	0	0
ENSE00002171320	0	NA	NA	NA	NA	NA	chr11	85717045	85717140	ENSG00000137501	ENST00000533577	SYTL2	SYTL2-227	3	0	0	0	0	0	0
ENSE00002141057	306.168	0.813784	0.396003	2.05499	0.0398796	0.0705239	chr11	85717483	85717726	ENSG00000137501	ENST00000389959	SYTL2	SYTL2-205	4	203.381	249.986	149.54	399.885	265.378	394.997
ENSE00003568907	301.734	0.77824	0.407154	1.91141	0.0559515	0.0920962	chr11	85717483	85717530	ENSG00000137501	ENST00000524452	SYTL2	SYTL2-208	10	203.381	249.986	149.54	398.743	240.576	394.997
ENSE00003568907	301.734	0.77824	0.407154	1.91141	0.0559515	0.0920962	chr11	85717483	85717530	ENSG00000137501	ENST00000530351	SYTL2	SYTL2-222	4	203.381	249.986	149.54	398.743	240.576	394.997
ENSE00003568907	301.734	0.77824	0.407154	1.91141	0.0559515	0.0920962	chr11	85717483	85717530	ENSG00000137501	ENST00000354566	SYTL2	SYTL2-202	4	203.381	249.986	149.54	398.743	240.576	394.997
ENSE00003568907	301.734	0.77824	0.407154	1.91141	0.0559515	0.0920962	chr11	85717483	85717530	ENSG00000137501	ENST00000389960	SYTL2	SYTL2-206	11	203.381	249.986	149.54	398.743	240.576	394.997
ENSE00003568907	301.734	0.77824	0.407154	1.91141	0.0559515	0.0920962	chr11	85717483	85717530	ENSG00000137501	ENST00000527523	SYTL2	SYTL2-215	10	203.381	249.986	149.54	398.743	240.576	394.997
ENSE00003625091	301.734	0.77824	0.407154	1.91141	0.0559515	0.0920962	chr11	85717483	85717530	ENSG00000137501	ENST00000533892	SYTL2	SYTL2-228	3	203.381	249.986	149.54	398.743	240.576	394.997
ENSE00003625091	301.734	0.77824	0.407154	1.91141	0.0559515	0.0920962	chr11	85717483	85717530	ENSG00000137501	ENST00000527794	SYTL2	SYTL2-216	3	203.381	249.986	149.54	398.743	240.576	394.997
ENSE00003625091	301.734	0.77824	0.407154	1.91141	0.0559515	0.0920962	chr11	85717483	85717530	ENSG00000137501	ENST00000529581	SYTL2	SYTL2-220	3	203.381	249.986	149.54	398.743	240.576	394.997
ENSE00003625091	301.734	0.77824	0.407154	1.91141	0.0559515	0.0920962	chr11	85717483	85717530	ENSG00000137501	ENST00000533577	SYTL2	SYTL2-227	2	203.381	249.986	149.54	398.743	240.576	394.997
ENSE00003625091	301.734	0.77824	0.407154	1.91141	0.0559515	0.0920962	chr11	85717483	85717530	ENSG00000137501	ENST00000524911	SYTL2	SYTL2-210	2	203.381	249.986	149.54	398.743	240.576	394.997
ENSE00003625091	301.734	0.77824	0.407154	1.91141	0.0559515	0.0920962	chr11	85717483	85717530	ENSG00000137501	ENST00000532995	SYTL2	SYTL2-225	2	203.381	249.986	149.54	398.743	240.576	394.997
ENSE00003675416	301.734	0.77824	0.407154	1.91141	0.0559515	0.0920962	chr11	85717483	85717530	ENSG00000137501	ENST00000533057	SYTL2	SYTL2-226	2	203.381	249.986	149.54	398.743	240.576	394.997
ENSE00002149715	24.4966	-0.303492	1.15218	-0.263408	0.792236	0.838474	chr11	85718235	85718420	ENSG00000137501	ENST00000529534	SYTL2	SYTL2-219	1	25.1805	15.8573	51.8091	3.42759	16.1211	55.1769
ENSE00002173082	25.1631	-0.156831	1.05455	-0.148718	0.881776	0.912832	chr11	85718235	85718488	ENSG00000137501	ENST00000524911	SYTL2	SYTL2-210	1	25.1805	15.8573	51.8091	11.4253	16.1211	55.1769
ENSE00003566122	464.789	0.694675	0.261678	2.65469	0.00793803	0.0190745	chr11	85718790	85718843	ENSG00000137501	ENST00000525423	SYTL2	SYTL2-211	3	339.937	387.106	352.067	646.671	396.827	701.535
ENSE00003566122	464.789	0.694675	0.261678	2.65469	0.00793803	0.0190745	chr11	85718790	85718843	ENSG00000137501	ENST00000526999	SYTL2	SYTL2-214	2	339.937	387.106	352.067	646.671	396.827	701.535
ENSE00003566122	464.789	0.694675	0.261678	2.65469	0.00793803	0.0190745	chr11	85718790	85718843	ENSG00000137501	ENST00000529581	SYTL2	SYTL2-220	2	339.937	387.106	352.067	646.671	396.827	701.535
ENSE00003566122	464.789	0.694675	0.261678	2.65469	0.00793803	0.0190745	chr11	85718790	85718843	ENSG00000137501	ENST00000533892	SYTL2	SYTL2-228	2	339.937	387.106	352.067	646.671	396.827	701.535
ENSE00003566122	464.789	0.694675	0.261678	2.65469	0.00793803	0.0190745	chr11	85718790	85718843	ENSG00000137501	ENST00000527794	SYTL2	SYTL2-216	2	339.937	387.106	352.067	646.671	396.827	701.535
ENSE00003612672	464.789	0.694675	0.261678	2.65469	0.00793803	0.0190745	chr11	85718790	85718843	ENSG00000137501	ENST00000354566	SYTL2	SYTL2-202	3	339.937	387.106	352.067	646.671	396.827	701.535
ENSE00003612672	464.789	0.694675	0.261678	2.65469	0.00793803	0.0190745	chr11	85718790	85718843	ENSG00000137501	ENST00000527523	SYTL2	SYTL2-215	9	339.937	387.106	352.067	646.671	396.827	701.535
ENSE00003612672	464.789	0.694675	0.261678	2.65469	0.00793803	0.0190745	chr11	85718790	85718843	ENSG00000137501	ENST00000634661	SYTL2	SYTL2-230	9	339.937	387.106	352.067	646.671	396.827	701.535
ENSE00003612672	464.789	0.694675	0.261678	2.65469	0.00793803	0.0190745	chr11	85718790	85718843	ENSG00000137501	ENST00000528231	SYTL2	SYTL2-217	9	339.937	387.106	352.067	646.671	396.827	701.535
ENSE00003612672	464.789	0.694675	0.261678	2.65469	0.00793803	0.0190745	chr11	85718790	85718843	ENSG00000137501	ENST00000389960	SYTL2	SYTL2-206	10	339.937	387.106	352.067	646.671	396.827	701.535
ENSE00003612672	464.789	0.694675	0.261678	2.65469	0.00793803	0.0190745	chr11	85718790	85718843	ENSG00000137501	ENST00000530351	SYTL2	SYTL2-222	3	339.937	387.106	352.067	646.671	396.827	701.535
ENSE00003612672	464.789	0.694675	0.261678	2.65469	0.00793803	0.0190745	chr11	85718790	85718843	ENSG00000137501	ENST00000524452	SYTL2	SYTL2-208	9	339.937	387.106	352.067	646.671	396.827	701.535
ENSE00003612672	464.789	0.694675	0.261678	2.65469	0.00793803	0.0190745	chr11	85718790	85718843	ENSG00000137501	ENST00000316356	SYTL2	SYTL2-201	10	339.937	387.106	352.067	646.671	396.827	701.535
ENSE00003612672	464.789	0.694675	0.261678	2.65469	0.00793803	0.0190745	chr11	85718790	85718843	ENSG00000137501	ENST00000389959	SYTL2	SYTL2-205	3	339.937	387.106	352.067	646.671	396.827	701.535
ENSE00003612672	464.789	0.694675	0.261678	2.65469	0.00793803	0.0190745	chr11	85718790	85718843	ENSG00000137501	ENST00000359152	SYTL2	SYTL2-203	9	339.937	387.106	352.067	646.671	396.827	701.535
ENSE00002148044	483.437	0.612396	0.265875	2.30332	0.0212607	0.0425731	chr11	85718790	85719075	ENSG00000137501	ENST00000532995	SYTL2	SYTL2-225	1	365.118	430.946	367.374	672.949	396.827	707.666
ENSE00002182515	483.437	0.612396	0.265875	2.30332	0.0212607	0.0425731	chr11	85718790	85719082	ENSG00000137501	ENST00000533057	SYTL2	SYTL2-226	1	365.118	430.946	367.374	672.949	396.827	707.666
ENSE00002184394	483.437	0.612396	0.265875	2.30332	0.0212607	0.0425731	chr11	85718790	85719180	ENSG00000137501	ENST00000534554	SYTL2	SYTL2-229	1	365.118	430.946	367.374	672.949	396.827	707.666
ENSE00002191791	483.437	0.612396	0.265875	2.30332	0.0212607	0.0425731	chr11	85718790	85719150	ENSG00000137501	ENST00000533577	SYTL2	SYTL2-227	1	365.118	430.946	367.374	672.949	396.827	707.666
ENSE00003467205	483.437	0.612396	0.265875	2.30332	0.0212607	0.0425731	chr11	85718790	85719168	ENSG00000137501	ENST00000528566	SYTL2	SYTL2-218	1	365.118	430.946	367.374	672.949	396.827	707.666
ENSE00003606771	483.437	0.612396	0.265875	2.30332	0.0212607	0.0425731	chr11	85718790	85719168	ENSG00000137501	ENST00000389958	SYTL2	SYTL2-204	1	365.118	430.946	367.374	672.949	396.827	707.666
ENSE00002157951	26.5185	0.487624	0.804	0.606498	0.544184	0.632576	chr11	85718990	85719098	ENSG00000137501	ENST00000533892	SYTL2	SYTL2-228	1	19.3696	27.0507	10.5973	42.2736	26.0418	12.2615
ENSE00002180983	26.5185	0.487624	0.804	0.606498	0.544184	0.632576	chr11	85718990	85719138	ENSG00000137501	ENST00000529581	SYTL2	SYTL2-220	1	19.3696	27.0507	10.5973	42.2736	26.0418	12.2615
ENSE00002140981	5.91183	1.17847	2.47223	0.476682	0.633589	0.713329	chr11	85719061	85719377	ENSG00000137501	ENST00000526999	SYTL2	SYTL2-214	1	0	4.66392	10.5973	17.1379	17.3612	0
ENSE00002172206	1.44676	4.94246	4.26238	1.15955	0.24623	0.332755	chr11	85719187	85719228	ENSG00000137501	ENST00000527794	SYTL2	SYTL2-216	1	0	0	0	0	17.3612	0
ENSE00003725749	220.489	-0.168753	0.370138	-0.455918	0.648449	0.724116	chr11	85720858	85720959	ENSG00000137501	ENST00000525423	SYTL2	SYTL2-211	2	136.556	306.886	202.527	189.66	193.453	191.805
ENSE00003737442	220.489	-0.168753	0.370138	-0.455918	0.648449	0.724116	chr11	85720858	85720959	ENSG00000137501	ENST00000359152	SYTL2	SYTL2-203	8	136.556	306.886	202.527	189.66	193.453	191.805
ENSE00003737442	220.489	-0.168753	0.370138	-0.455918	0.648449	0.724116	chr11	85720858	85720959	ENSG00000137501	ENST00000634661	SYTL2	SYTL2-230	8	136.556	306.886	202.527	189.66	193.453	191.805
ENSE00003737442	220.489	-0.168753	0.370138	-0.455918	0.648449	0.724116	chr11	85720858	85720959	ENSG00000137501	ENST00000524452	SYTL2	SYTL2-208	8	136.556	306.886	202.527	189.66	193.453	191.805
ENSE00003737442	220.489	-0.168753	0.370138	-0.455918	0.648449	0.724116	chr11	85720858	85720959	ENSG00000137501	ENST00000530351	SYTL2	SYTL2-222	2	136.556	306.886	202.527	189.66	193.453	191.805
ENSE00003737442	220.489	-0.168753	0.370138	-0.455918	0.648449	0.724116	chr11	85720858	85720959	ENSG00000137501	ENST00000354566	SYTL2	SYTL2-202	2	136.556	306.886	202.527	189.66	193.453	191.805
ENSE00003737442	220.489	-0.168753	0.370138	-0.455918	0.648449	0.724116	chr11	85720858	85720959	ENSG00000137501	ENST00000528231	SYTL2	SYTL2-217	8	136.556	306.886	202.527	189.66	193.453	191.805
ENSE00003737442	220.489	-0.168753	0.370138	-0.455918	0.648449	0.724116	chr11	85720858	85720959	ENSG00000137501	ENST00000316356	SYTL2	SYTL2-201	9	136.556	306.886	202.527	189.66	193.453	191.805
ENSE00003737442	220.489	-0.168753	0.370138	-0.455918	0.648449	0.724116	chr11	85720858	85720959	ENSG00000137501	ENST00000527523	SYTL2	SYTL2-215	8	136.556	306.886	202.527	189.66	193.453	191.805
ENSE00003737442	220.489	-0.168753	0.370138	-0.455918	0.648449	0.724116	chr11	85720858	85720959	ENSG00000137501	ENST00000389959	SYTL2	SYTL2-205	2	136.556	306.886	202.527	189.66	193.453	191.805
ENSE00003737442	220.489	-0.168753	0.370138	-0.455918	0.648449	0.724116	chr11	85720858	85720959	ENSG00000137501	ENST00000389960	SYTL2	SYTL2-206	9	136.556	306.886	202.527	189.66	193.453	191.805
ENSE00003675916	260.994	-0.726181	0.227052	-3.19831	0.00138238	0.00471096	chr11	85724032	85728028	ENSG00000137501	ENST00000525423	SYTL2	SYTL2-211	1	307.009	369.383	266.11	174.807	162.451	231.218
ENSE00003789365	260.994	-0.726181	0.227052	-3.19831	0.00138238	0.00471096	chr11	85724032	85727967	ENSG00000137501	ENST00000634661	SYTL2	SYTL2-230	7	307.009	369.383	266.11	174.807	162.451	231.218
ENSE00002176747	86.5806	-0.517948	0.516775	-1.00227	0.316214	0.408546	chr11	85724032	85724713	ENSG00000137501	ENST00000530351	SYTL2	SYTL2-222	1	58.1089	105.405	116.571	66.2667	31.0021	97.2165
ENSE00001691697	88.51	-0.356453	0.535004	-0.666261	0.505244	0.598296	chr11	85724032	85726468	ENSG00000137501	ENST00000354566	SYTL2	SYTL2-202	1	58.1089	105.405	116.571	75.4069	31.0021	111.23
ENSE00001691697	88.51	-0.356453	0.535004	-0.666261	0.505244	0.598296	chr11	85724032	85726468	ENSG00000137501	ENST00000389959	SYTL2	SYTL2-205	1	58.1089	105.405	116.571	75.4069	31.0021	111.23
ENSE00001759516	165.673	-0.970047	0.287266	-3.37683	0.000733272	0.00286634	chr11	85727896	85727967	ENSG00000137501	ENST00000359152	SYTL2	SYTL2-203	7	245.994	249.053	148.362	99.4	131.449	98.9681
ENSE00001759516	165.673	-0.970047	0.287266	-3.37683	0.000733272	0.00286634	chr11	85727896	85727967	ENSG00000137501	ENST00000524452	SYTL2	SYTL2-208	7	245.994	249.053	148.362	99.4	131.449	98.9681
ENSE00001759516	165.673	-0.970047	0.287266	-3.37683	0.000733272	0.00286634	chr11	85727896	85727967	ENSG00000137501	ENST00000316356	SYTL2	SYTL2-201	8	245.994	249.053	148.362	99.4	131.449	98.9681
ENSE00001759516	165.673	-0.970047	0.287266	-3.37683	0.000733272	0.00286634	chr11	85727896	85727967	ENSG00000137501	ENST00000527523	SYTL2	SYTL2-215	7	245.994	249.053	148.362	99.4	131.449	98.9681
ENSE00001759516	165.673	-0.970047	0.287266	-3.37683	0.000733272	0.00286634	chr11	85727896	85727967	ENSG00000137501	ENST00000528231	SYTL2	SYTL2-217	7	245.994	249.053	148.362	99.4	131.449	98.9681
ENSE00001759516	165.673	-0.970047	0.287266	-3.37683	0.000733272	0.00286634	chr11	85727896	85727967	ENSG00000137501	ENST00000389960	SYTL2	SYTL2-206	8	245.994	249.053	148.362	99.4	131.449	98.9681
ENSE00001656392	2680.02	-0.558969	0.195419	-2.86036	0.00423156	0.0114861	chr11	85733595	85734742	ENSG00000137501	ENST00000438197	SYTL2	SYTL2-207	6	2796.01	3053.94	2889.54	2013.14	2034.98	1884.77
ENSE00001749316	2679.91	-0.558969	0.19544	-2.86005	0.00423576	0.0114861	chr11	85733939	85734742	ENSG00000137501	ENST00000359152	SYTL2	SYTL2-203	6	2796.01	3053.94	2889.54	2013.14	2034.98	1884.77
ENSE00001749316	2679.91	-0.558969	0.19544	-2.86005	0.00423576	0.0114861	chr11	85733939	85734742	ENSG00000137501	ENST00000389960	SYTL2	SYTL2-206	7	2796.01	3053.94	2889.54	2013.14	2034.98	1884.77
ENSE00001749316	2679.91	-0.558969	0.19544	-2.86005	0.00423576	0.0114861	chr11	85733939	85734742	ENSG00000137501	ENST00000528231	SYTL2	SYTL2-217	6	2796.01	3053.94	2889.54	2013.14	2034.98	1884.77
ENSE00001749316	2679.91	-0.558969	0.19544	-2.86005	0.00423576	0.0114861	chr11	85733939	85734742	ENSG00000137501	ENST00000524452	SYTL2	SYTL2-208	6	2796.01	3053.94	2889.54	2013.14	2034.98	1884.77
ENSE00001749316	2679.91	-0.558969	0.19544	-2.86005	0.00423576	0.0114861	chr11	85733939	85734742	ENSG00000137501	ENST00000634661	SYTL2	SYTL2-230	6	2796.01	3053.94	2889.54	2013.14	2034.98	1884.77
ENSE00001749316	2679.91	-0.558969	0.19544	-2.86005	0.00423576	0.0114861	chr11	85733939	85734742	ENSG00000137501	ENST00000527523	SYTL2	SYTL2-215	6	2796.01	3053.94	2889.54	2013.14	2034.98	1884.77
ENSE00001749316	2679.91	-0.558969	0.19544	-2.86005	0.00423576	0.0114861	chr11	85733939	85734742	ENSG00000137501	ENST00000316356	SYTL2	SYTL2-201	7	2796.01	3053.94	2889.54	2013.14	2034.98	1884.77
ENSE00002170653	842.943	-0.414291	0.265322	-1.56147	0.118414	0.176376	chr11	85736501	85736615	ENSG00000137501	ENST00000359152	SYTL2	SYTL2-203	5	1021.75	712.647	1110.36	623.821	890.38	620.959
ENSE00002170653	842.943	-0.414291	0.265322	-1.56147	0.118414	0.176376	chr11	85736501	85736615	ENSG00000137501	ENST00000316356	SYTL2	SYTL2-201	6	1021.75	712.647	1110.36	623.821	890.38	620.959
ENSE00002170653	842.943	-0.414291	0.265322	-1.56147	0.118414	0.176376	chr11	85736501	85736615	ENSG00000137501	ENST00000634661	SYTL2	SYTL2-230	5	1021.75	712.647	1110.36	623.821	890.38	620.959
ENSE00003487543	837.894	-0.414076	0.26985	-1.53447	0.124915	0.184073	chr11	85736501	85736612	ENSG00000137501	ENST00000528231	SYTL2	SYTL2-217	5	1021.75	712.647	1096.23	613.538	890.38	620.959
ENSE00003487543	837.894	-0.414076	0.26985	-1.53447	0.124915	0.184073	chr11	85736501	85736612	ENSG00000137501	ENST00000524452	SYTL2	SYTL2-208	5	1021.75	712.647	1096.23	613.538	890.38	620.959
ENSE00003487543	837.894	-0.414076	0.26985	-1.53447	0.124915	0.184073	chr11	85736501	85736612	ENSG00000137501	ENST00000527523	SYTL2	SYTL2-215	5	1021.75	712.647	1096.23	613.538	890.38	620.959
ENSE00003487543	837.894	-0.414076	0.26985	-1.53447	0.124915	0.184073	chr11	85736501	85736612	ENSG00000137501	ENST00000389960	SYTL2	SYTL2-206	6	1021.75	712.647	1096.23	613.538	890.38	620.959
ENSE00003589286	837.894	-0.414076	0.26985	-1.53447	0.124915	0.184073	chr11	85736501	85736612	ENSG00000137501	ENST00000438197	SYTL2	SYTL2-207	5	1021.75	712.647	1096.23	613.538	890.38	620.959
ENSE00003572467	688.109	-0.597881	0.284219	-2.10359	0.035414	0.0634292	chr11	85737575	85737656	ENSG00000137501	ENST00000359152	SYTL2	SYTL2-203	4	809.651	638.025	967.889	485.575	601.441	508.854
ENSE00003572467	688.109	-0.597881	0.284219	-2.10359	0.035414	0.0634292	chr11	85737575	85737656	ENSG00000137501	ENST00000634661	SYTL2	SYTL2-230	4	809.651	638.025	967.889	485.575	601.441	508.854
ENSE00003572467	688.109	-0.597881	0.284219	-2.10359	0.035414	0.0634292	chr11	85737575	85737656	ENSG00000137501	ENST00000524452	SYTL2	SYTL2-208	4	809.651	638.025	967.889	485.575	601.441	508.854
ENSE00003572467	688.109	-0.597881	0.284219	-2.10359	0.035414	0.0634292	chr11	85737575	85737656	ENSG00000137501	ENST00000389960	SYTL2	SYTL2-206	5	809.651	638.025	967.889	485.575	601.441	508.854
ENSE00003572467	688.109	-0.597881	0.284219	-2.10359	0.035414	0.0634292	chr11	85737575	85737656	ENSG00000137501	ENST00000527523	SYTL2	SYTL2-215	4	809.651	638.025	967.889	485.575	601.441	508.854
ENSE00003572467	688.109	-0.597881	0.284219	-2.10359	0.035414	0.0634292	chr11	85737575	85737656	ENSG00000137501	ENST00000528231	SYTL2	SYTL2-217	4	809.651	638.025	967.889	485.575	601.441	508.854
ENSE00003572467	688.109	-0.597881	0.284219	-2.10359	0.035414	0.0634292	chr11	85737575	85737656	ENSG00000137501	ENST00000316356	SYTL2	SYTL2-201	5	809.651	638.025	967.889	485.575	601.441	508.854
ENSE00003666764	688.109	-0.597881	0.284219	-2.10359	0.035414	0.0634292	chr11	85737575	85737656	ENSG00000137501	ENST00000438197	SYTL2	SYTL2-207	4	809.651	638.025	967.889	485.575	601.441	508.854
ENSE00003465344	772.738	-0.726888	0.215931	-3.3663	0.000761831	0.00292985	chr11	85745637	85745772	ENSG00000137501	ENST00000438197	SYTL2	SYTL2-207	3	968.482	778.875	1069.15	555.269	678.326	469.442
ENSE00003686170	772.738	-0.726888	0.215931	-3.3663	0.000761831	0.00292985	chr11	85745637	85745772	ENSG00000137501	ENST00000527523	SYTL2	SYTL2-215	3	968.482	778.875	1069.15	555.269	678.326	469.442
ENSE00003686170	772.738	-0.726888	0.215931	-3.3663	0.000761831	0.00292985	chr11	85745637	85745772	ENSG00000137501	ENST00000316356	SYTL2	SYTL2-201	4	968.482	778.875	1069.15	555.269	678.326	469.442
ENSE00003686170	772.738	-0.726888	0.215931	-3.3663	0.000761831	0.00292985	chr11	85745637	85745772	ENSG00000137501	ENST00000359152	SYTL2	SYTL2-203	3	968.482	778.875	1069.15	555.269	678.326	469.442
ENSE00003686170	772.738	-0.726888	0.215931	-3.3663	0.000761831	0.00292985	chr11	85745637	85745772	ENSG00000137501	ENST00000634661	SYTL2	SYTL2-230	3	968.482	778.875	1069.15	555.269	678.326	469.442
ENSE00003686170	772.738	-0.726888	0.215931	-3.3663	0.000761831	0.00292985	chr11	85745637	85745772	ENSG00000137501	ENST00000528231	SYTL2	SYTL2-217	3	968.482	778.875	1069.15	555.269	678.326	469.442
ENSE00003686170	772.738	-0.726888	0.215931	-3.3663	0.000761831	0.00292985	chr11	85745637	85745772	ENSG00000137501	ENST00000389960	SYTL2	SYTL2-206	4	968.482	778.875	1069.15	555.269	678.326	469.442
ENSE00003686170	772.738	-0.726888	0.215931	-3.3663	0.000761831	0.00292985	chr11	85745637	85745772	ENSG00000137501	ENST00000524452	SYTL2	SYTL2-208	3	968.482	778.875	1069.15	555.269	678.326	469.442
ENSE00003568211	948.93	-0.595943	0.193019	-3.08749	0.00201857	0.00622202	chr11	85748272	85748423	ENSG00000137501	ENST00000438197	SYTL2	SYTL2-207	2	960.734	883.347	1362.34	712.938	752.731	655.116
ENSE00003583564	948.93	-0.595943	0.193019	-3.08749	0.00201857	0.00622202	chr11	85748272	85748423	ENSG00000137501	ENST00000527523	SYTL2	SYTL2-215	2	960.734	883.347	1362.34	712.938	752.731	655.116
ENSE00003690664	948.93	-0.595943	0.193019	-3.08749	0.00201857	0.00622202	chr11	85748272	85748423	ENSG00000137501	ENST00000634661	SYTL2	SYTL2-230	2	960.734	883.347	1362.34	712.938	752.731	655.116
ENSE00003690664	948.93	-0.595943	0.193019	-3.08749	0.00201857	0.00622202	chr11	85748272	85748423	ENSG00000137501	ENST00000524452	SYTL2	SYTL2-208	2	960.734	883.347	1362.34	712.938	752.731	655.116
ENSE00003690664	948.93	-0.595943	0.193019	-3.08749	0.00201857	0.00622202	chr11	85748272	85748423	ENSG00000137501	ENST00000528231	SYTL2	SYTL2-217	2	960.734	883.347	1362.34	712.938	752.731	655.116
ENSE00003690664	948.93	-0.595943	0.193019	-3.08749	0.00201857	0.00622202	chr11	85748272	85748423	ENSG00000137501	ENST00000389960	SYTL2	SYTL2-206	3	960.734	883.347	1362.34	712.938	752.731	655.116
ENSE00003690664	948.93	-0.595943	0.193019	-3.08749	0.00201857	0.00622202	chr11	85748272	85748423	ENSG00000137501	ENST00000359152	SYTL2	SYTL2-203	2	960.734	883.347	1362.34	712.938	752.731	655.116
ENSE00003690664	948.93	-0.595943	0.193019	-3.08749	0.00201857	0.00622202	chr11	85748272	85748423	ENSG00000137501	ENST00000316356	SYTL2	SYTL2-201	3	960.734	883.347	1362.34	712.938	752.731	655.116
ENSE00002177467	695.942	-0.823806	0.264169	-3.11848	0.0018179	0.00577403	chr11	85757625	85757725	ENSG00000137501	ENST00000524452	SYTL2	SYTL2-208	1	757.353	610.041	1092.7	579.262	370.785	438.788
ENSE00002177467	695.942	-0.823806	0.264169	-3.11848	0.0018179	0.00577403	chr11	85757625	85757725	ENSG00000137501	ENST00000634661	SYTL2	SYTL2-230	1	757.353	610.041	1092.7	579.262	370.785	438.788
ENSE00002189661	1482.08	-0.545313	0.187579	-2.90712	0.00364778	0.01037	chr11	85757625	85758003	ENSG00000137501	ENST00000528231	SYTL2	SYTL2-217	1	1465.31	1529.77	1885.15	1201.94	1073.91	1067.63
ENSE00002143392	778.526	-0.804032	0.293339	-2.74097	0.00612583	0.0155125	chr11	85757625	85757745	ENSG00000137501	ENST00000438197	SYTL2	SYTL2-207	1	768.006	638.025	1301.12	647.814	443.95	458.056
ENSE00003712552	1533.68	-0.539515	0.198338	-2.72018	0.00652469	0.0162722	chr11	85757625	85758069	ENSG00000137501	ENST00000359152	SYTL2	SYTL2-203	1	1510.83	1599.73	1968.75	1256.78	1091.27	1145.58
ENSE00002151716	1566.58	-0.544257	0.202252	-2.69098	0.00712417	0.0175021	chr11	85757625	85758114	ENSG00000137501	ENST00000389960	SYTL2	SYTL2-206	2	1532.14	1621.18	1994.65	1262.49	1091.27	1175.36
ENSE00002151716	1566.58	-0.544257	0.202252	-2.69098	0.00712417	0.0175021	chr11	85757625	85758114	ENSG00000137501	ENST00000316356	SYTL2	SYTL2-201	2	1532.14	1621.18	1994.65	1262.49	1091.27	1175.36
ENSE00002188819	1084.53	-0.526302	0.270698	-1.94424	0.0518665	0.0868486	chr11	85757760	85758069	ENSG00000137501	ENST00000524830	SYTL2	SYTL2-209	2	1098.26	1289.11	1258.73	861.467	828.376	841.667
ENSE00002183634	14.1057	-0.0481101	1.5931	-0.0301992	0.975908	0.981873	chr11	85810954	85811141	ENSG00000137501	ENST00000527523	SYTL2	SYTL2-215	1	37.7708	19.5885	0	5.71264	11.1608	38.5363
ENSE00002184112	14.1057	-0.0481101	1.5931	-0.0301992	0.975908	0.981873	chr11	85810954	85811140	ENSG00000137501	ENST00000524830	SYTL2	SYTL2-209	1	37.7708	19.5885	0	5.71264	11.1608	38.5363
ENSE00002191843	14.1057	-0.0481101	1.5931	-0.0301992	0.975908	0.981873	chr11	85810954	85811129	ENSG00000137501	ENST00000316356	SYTL2	SYTL2-201	1	37.7708	19.5885	0	5.71264	11.1608	38.5363
ENSE00002238565	14.1057	-0.0481101	1.5931	-0.0301992	0.975908	0.981873	chr11	85810954	85811159	ENSG00000137501	ENST00000389960	SYTL2	SYTL2-206	1	37.7708	19.5885	0	5.71264	11.1608	38.5363
ENSE00001303237	40.2681	0.218385	0.64956	0.336205	0.736716	0.796738	chr11	85855101	85855584	ENSG00000150676	ENST00000280245	CCDC83	CCDC83-201	1	6.77937	36.3786	36.5019	26.2782	31.0021	35.033
ENSE00002170566	36.9124	0.124997	0.644586	0.193919	0.84624	0.885512	chr11	85855383	85855584	ENSG00000150676	ENST00000342404	CCDC83	CCDC83-202	1	6.77937	31.7147	34.1469	25.1356	24.8017	28.9022
ENSE00003564395	4.33201	-2.3398	2.29027	-1.02162	0.306959	0.398781	chr11	85865096	85865218	ENSG00000150676	ENST00000342404	CCDC83	CCDC83-202	2	1.93696	9.32784	0	2.28506	0	0
ENSE00003564395	4.33201	-2.3398	2.29027	-1.02162	0.306959	0.398781	chr11	85865096	85865218	ENSG00000150676	ENST00000280245	CCDC83	CCDC83-201	2	1.93696	9.32784	0	2.28506	0	0
ENSE00003585618	11.512	0.862798	3.09829	0.278476	0.780647	0.829139	chr11	85873210	85873295	ENSG00000150676	ENST00000529676	CCDC83	CCDC83-204	1	0	14.9246	0	0	27.2818	0
ENSE00003643973	11.512	0.862798	3.09829	0.278476	0.780647	0.829139	chr11	85873211	85873295	ENSG00000150676	ENST00000280245	CCDC83	CCDC83-201	3	0	14.9246	0	0	27.2818	0
ENSE00003643973	11.512	0.862798	3.09829	0.278476	0.780647	0.829139	chr11	85873211	85873295	ENSG00000150676	ENST00000342404	CCDC83	CCDC83-202	3	0	14.9246	0	0	27.2818	0
ENSE00002156784	11.512	0.862798	3.09829	0.278476	0.780647	0.829139	chr11	85873231	85873295	ENSG00000150676	ENST00000526729	CCDC83	CCDC83-203	1	0	14.9246	0	0	27.2818	0
ENSE00000995878	62.4645	0.232281	0.589631	0.393943	0.693623	0.760628	chr11	85882513	85882675	ENSG00000150676	ENST00000526729	CCDC83	CCDC83-203	2	68.7622	75.5555	43.5668	55.9839	71.9249	92.8373
ENSE00000995878	62.4645	0.232281	0.589631	0.393943	0.693623	0.760628	chr11	85882513	85882675	ENSG00000150676	ENST00000342404	CCDC83	CCDC83-202	4	68.7622	75.5555	43.5668	55.9839	71.9249	92.8373
ENSE00000995878	62.4645	0.232281	0.589631	0.393943	0.693623	0.760628	chr11	85882513	85882675	ENSG00000150676	ENST00000280245	CCDC83	CCDC83-201	4	68.7622	75.5555	43.5668	55.9839	71.9249	92.8373
ENSE00000995879	28.7435	-0.36673	1.09329	-0.335435	0.737297	0.796842	chr11	85886200	85886367	ENSG00000150676	ENST00000342404	CCDC83	CCDC83-202	5	46.4871	29.8491	27.082	14.8529	34.7224	30.6538
ENSE00000995879	28.7435	-0.36673	1.09329	-0.335435	0.737297	0.796842	chr11	85886200	85886367	ENSG00000150676	ENST00000280245	CCDC83	CCDC83-201	5	46.4871	29.8491	27.082	14.8529	34.7224	30.6538
ENSE00003466239	19.5101	-0.649029	0.787725	-0.823928	0.40998	0.509689	chr11	85895293	85895384	ENSG00000150676	ENST00000526729	CCDC83	CCDC83-203	3	12.5903	27.9835	20.0172	9.14023	17.3612	12.2615
ENSE00003466239	19.5101	-0.649029	0.787725	-0.823928	0.40998	0.509689	chr11	85895293	85895384	ENSG00000150676	ENST00000342404	CCDC83	CCDC83-202	6	12.5903	27.9835	20.0172	9.14023	17.3612	12.2615
ENSE00003466239	19.5101	-0.649029	0.787725	-0.823928	0.40998	0.509689	chr11	85895293	85895384	ENSG00000150676	ENST00000280245	CCDC83	CCDC83-201	6	12.5903	27.9835	20.0172	9.14023	17.3612	12.2615
ENSE00003575685	19.5101	-0.649029	0.787725	-0.823928	0.40998	0.509689	chr11	85895293	85895384	ENSG00000150676	ENST00000529676	CCDC83	CCDC83-204	2	12.5903	27.9835	20.0172	9.14023	17.3612	12.2615
ENSE00003481941	53.0698	-0.756653	0.889	-0.851128	0.394698	0.496313	chr11	85898947	85899015	ENSG00000150676	ENST00000342404	CCDC83	CCDC83-202	7	78.447	84.8834	85.956	35.4184	28.5219	83.2033
ENSE00003481941	53.0698	-0.756653	0.889	-0.851128	0.394698	0.496313	chr11	85898947	85899015	ENSG00000150676	ENST00000280245	CCDC83	CCDC83-201	7	78.447	84.8834	85.956	35.4184	28.5219	83.2033
ENSE00003481941	53.0698	-0.756653	0.889	-0.851128	0.394698	0.496313	chr11	85898947	85899015	ENSG00000150676	ENST00000526729	CCDC83	CCDC83-203	4	78.447	84.8834	85.956	35.4184	28.5219	83.2033
ENSE00003658832	53.0698	-0.756653	0.889	-0.851128	0.394698	0.496313	chr11	85898947	85899015	ENSG00000150676	ENST00000529676	CCDC83	CCDC83-204	3	78.447	84.8834	85.956	35.4184	28.5219	83.2033
ENSE00003539843	24.5073	0.279239	1.66776	0.167434	0.867029	0.899829	chr11	85911281	85911402	ENSG00000150676	ENST00000529676	CCDC83	CCDC83-204	4	23.2436	13.059	16.4847	2.28506	62.0042	0
ENSE00003580058	24.5073	0.279239	1.66776	0.167434	0.867029	0.899829	chr11	85911281	85911402	ENSG00000150676	ENST00000342404	CCDC83	CCDC83-202	8	23.2436	13.059	16.4847	2.28506	62.0042	0
ENSE00003580058	24.5073	0.279239	1.66776	0.167434	0.867029	0.899829	chr11	85911281	85911402	ENSG00000150676	ENST00000280245	CCDC83	CCDC83-201	8	23.2436	13.059	16.4847	2.28506	62.0042	0
ENSE00003580058	24.5073	0.279239	1.66776	0.167434	0.867029	0.899829	chr11	85911281	85911402	ENSG00000150676	ENST00000526729	CCDC83	CCDC83-203	5	23.2436	13.059	16.4847	2.28506	62.0042	0
ENSE00001372114	49.61	1.17314	1.12119	1.04633	0.295409	0.387136	chr11	85912649	85912741	ENSG00000150676	ENST00000280245	CCDC83	CCDC83-201	9	1.93696	34.513	69.4713	39.9885	151.29	47.2945
ENSE00001101498	34.1417	-0.798923	1.21643	-0.656774	0.511326	0.604195	chr11	85915419	85915498	ENSG00000150676	ENST00000280245	CCDC83	CCDC83-201	10	4.84241	67.1605	34.1469	37.7034	17.3612	6.13077
ENSE00001101498	34.1417	-0.798923	1.21643	-0.656774	0.511326	0.604195	chr11	85915419	85915498	ENSG00000150676	ENST00000526729	CCDC83	CCDC83-203	6	4.84241	67.1605	34.1469	37.7034	17.3612	6.13077
ENSE00001101498	34.1417	-0.798923	1.21643	-0.656774	0.511326	0.604195	chr11	85915419	85915498	ENSG00000150676	ENST00000342404	CCDC83	CCDC83-202	9	4.84241	67.1605	34.1469	37.7034	17.3612	6.13077
ENSE00002193973	17.7111	0.757736	1.44185	0.52553	0.599215	0.683038	chr11	85915419	85915442	ENSG00000150676	ENST00000529676	CCDC83	CCDC83-204	5	0	24.2524	7.06488	29.7057	17.3612	6.13077
ENSE00000995881	49.115	-0.644865	0.742764	-0.868197	0.385286	0.486709	chr11	85916028	85916233	ENSG00000150676	ENST00000280245	CCDC83	CCDC83-201	11	64.8883	84.8834	37.6794	14.8529	31.0021	73.5692
ENSE00000995881	49.115	-0.644865	0.742764	-0.868197	0.385286	0.486709	chr11	85916028	85916233	ENSG00000150676	ENST00000342404	CCDC83	CCDC83-202	10	64.8883	84.8834	37.6794	14.8529	31.0021	73.5692
ENSE00001469305	49.115	-0.644865	0.742764	-0.868197	0.385286	0.486709	chr11	85916031	85916233	ENSG00000150676	ENST00000526729	CCDC83	CCDC83-203	7	64.8883	84.8834	37.6794	14.8529	31.0021	73.5692
ENSE00002168113	147.961	-0.311258	0.67848	-0.458759	0.646408	0.722817	chr11	85919349	85920021	ENSG00000150676	ENST00000280245	CCDC83	CCDC83-201	12	141.398	162.304	118.925	100.543	141.37	98.9681
ENSE00003903383	147.961	-0.311258	0.67848	-0.458759	0.646408	0.722817	chr11	85919349	85920013	ENSG00000150676	ENST00000342404	CCDC83	CCDC83-202	11	141.398	162.304	118.925	100.543	141.37	98.9681
ENSE00002179117	89.8131	-0.148208	0.721697	-0.20536	0.837291	0.876706	chr11	85919349	85919583	ENSG00000150676	ENST00000526729	CCDC83	CCDC83-203	8	92.9743	97.0096	68.2938	65.1241	114.088	54.3011
ENSE00002144222	333338	-0.34658	0.167836	-2.06499	0.038924	0.0691888	chr11	85957175	85959060	ENSG00000073921	ENST00000393346	PICALM	PICALM-202	20	378641	387959	371214	340156	281662	273013
ENSE00002142956	321260	-0.341001	0.165765	-2.05713	0.0396734	0.0702933	chr11	85957684	85959060	ENSG00000073921	ENST00000532317	PICALM	PICALM-219	20	363894	372275	357897	328202	272357	263201
ENSE00002180439	321253	-0.34098	0.165741	-2.05731	0.0396565	0.0702933	chr11	85957688	85959060	ENSG00000073921	ENST00000526033	PICALM	PICALM-204	20	363878	372275	357897	328202	272357	263201
ENSE00002157367	174679	-0.317332	0.12807	-2.4778	0.0132197	0.0291293	chr11	85958755	85959060	ENSG00000073921	ENST00000530692	PICALM	PICALM-214	10	201013	202284	197173	182428	151982	147500
ENSE00002191987	161638	-0.316941	0.117757	-2.69147	0.00711369	0.0175021	chr11	85958811	85959060	ENSG00000073921	ENST00000526548	PICALM	PICALM-205	3	185608	187997	183679	169254	141322	136796
ENSE00003775135	159926	-0.313394	0.114414	-2.73912	0.00616035	0.0155742	chr11	85958817	85959060	ENSG00000073921	ENST00000630913	PICALM	PICALM-224	19	183726	185635	181559	167390	140347	135617
ENSE00002169627	159644	-0.313548	0.114562	-2.73693	0.00620158	0.0156083	chr11	85958818	85959060	ENSG00000073921	ENST00000529760	PICALM	PICALM-212	11	183439	185386	181232	167134	140059	135419
ENSE00002179476	151871	-0.295343	0.113589	-2.6001	0.00931969	0.0218211	chr11	85958839	85959060	ENSG00000073921	ENST00000528398	PICALM	PICALM-209	19	173216	174908	170925	159351	134900	128714
ENSE00002179116	137127	-0.291515	0.104918	-2.77849	0.00546115	0.0142078	chr11	85958883	85959060	ENSG00000073921	ENST00000532603	PICALM	PICALM-220	6	156002	159350	155592	144803	123011	116971
ENSE00002144985	94693	-0.27692	0.0954043	-2.90259	0.00370088	0.0105029	chr11	85958987	85959060	ENSG00000073921	ENST00000356360	PICALM	PICALM-201	19	109257	109314	109057	101124	88427.9	80860.5
ENSE00002155676	67728.8	-0.293612	0.111083	-2.64317	0.00821342	0.0196216	chr11	85959023	85959060	ENSG00000073921	ENST00000529016	PICALM	PICALM-211	8	79624.7	79066.5	79047.8	72340.4	63854.4	57769.4
ENSE00002175787	55361.5	-0.271173	0.109573	-2.4748	0.013331	0.0293354	chr11	85959037	85959060	ENSG00000073921	ENST00000526961	PICALM	PICALM-207	10	64922.2	64463.8	63887.7	59361.2	53554.3	47243.7
ENSE00002147399	7989.88	-0.334301	0.150782	-2.21711	0.0266158	0.0499539	chr11	85960675	85960777	ENSG00000073921	ENST00000530692	PICALM	PICALM-214	9	9189.92	9746.66	8573.23	7893.73	7106.92	6820.92
ENSE00003476182	82050.6	-0.135733	0.083113	-1.63311	0.102445	0.156568	chr11	85974708	85974812	ENSG00000073921	ENST00000630913	PICALM	PICALM-224	18	88792.3	90945.6	86833.3	87486.9	81638.4	73515.8
ENSE00003476182	82050.6	-0.135733	0.083113	-1.63311	0.102445	0.156568	chr11	85974708	85974812	ENSG00000073921	ENST00000526548	PICALM	PICALM-205	2	88792.3	90945.6	86833.3	87486.9	81638.4	73515.8
ENSE00003486140	82050.6	-0.135733	0.083113	-1.63311	0.102445	0.156568	chr11	85974708	85974812	ENSG00000073921	ENST00000532603	PICALM	PICALM-220	5	88792.3	90945.6	86833.3	87486.9	81638.4	73515.8
ENSE00003486140	82050.6	-0.135733	0.083113	-1.63311	0.102445	0.156568	chr11	85974708	85974812	ENSG00000073921	ENST00000356360	PICALM	PICALM-201	18	88792.3	90945.6	86833.3	87486.9	81638.4	73515.8
ENSE00003486140	82050.6	-0.135733	0.083113	-1.63311	0.102445	0.156568	chr11	85974708	85974812	ENSG00000073921	ENST00000532317	PICALM	PICALM-219	19	88792.3	90945.6	86833.3	87486.9	81638.4	73515.8
ENSE00003486140	82050.6	-0.135733	0.083113	-1.63311	0.102445	0.156568	chr11	85974708	85974812	ENSG00000073921	ENST00000526033	PICALM	PICALM-204	19	88792.3	90945.6	86833.3	87486.9	81638.4	73515.8
ENSE00003486140	82050.6	-0.135733	0.083113	-1.63311	0.102445	0.156568	chr11	85974708	85974812	ENSG00000073921	ENST00000393346	PICALM	PICALM-202	19	88792.3	90945.6	86833.3	87486.9	81638.4	73515.8
ENSE00003486140	82050.6	-0.135733	0.083113	-1.63311	0.102445	0.156568	chr11	85974708	85974812	ENSG00000073921	ENST00000529760	PICALM	PICALM-212	10	88792.3	90945.6	86833.3	87486.9	81638.4	73515.8
ENSE00003486140	82050.6	-0.135733	0.083113	-1.63311	0.102445	0.156568	chr11	85974708	85974812	ENSG00000073921	ENST00000526961	PICALM	PICALM-207	9	88792.3	90945.6	86833.3	87486.9	81638.4	73515.8
ENSE00003486140	82050.6	-0.135733	0.083113	-1.63311	0.102445	0.156568	chr11	85974708	85974812	ENSG00000073921	ENST00000530692	PICALM	PICALM-214	8	88792.3	90945.6	86833.3	87486.9	81638.4	73515.8
ENSE00003486140	82050.6	-0.135733	0.083113	-1.63311	0.102445	0.156568	chr11	85974708	85974812	ENSG00000073921	ENST00000528398	PICALM	PICALM-209	18	88792.3	90945.6	86833.3	87486.9	81638.4	73515.8
ENSE00002180880	53831.7	-0.0968992	0.085498	-1.13335	0.257067	0.344851	chr11	85974782	85974812	ENSG00000073921	ENST00000526907	PICALM	PICALM-206	3	57532.7	59649.7	56864	58576.3	55162.7	49007.6
ENSE00003517912	38896.4	-0.00524446	0.0927461	-0.0565464	0.954907	0.966058	chr11	85976623	85976682	ENSG00000073921	ENST00000630913	PICALM	PICALM-224	17	41344.5	41223.5	38676.7	42620.9	41955.8	36234.6
ENSE00003517912	38896.4	-0.00524446	0.0927461	-0.0565464	0.954907	0.966058	chr11	85976623	85976682	ENSG00000073921	ENST00000526907	PICALM	PICALM-206	2	41344.5	41223.5	38676.7	42620.9	41955.8	36234.6
ENSE00003690111	38896.4	-0.00524446	0.0927461	-0.0565464	0.954907	0.966058	chr11	85976623	85976682	ENSG00000073921	ENST00000526033	PICALM	PICALM-204	18	41344.5	41223.5	38676.7	42620.9	41955.8	36234.6
ENSE00003690111	38896.4	-0.00524446	0.0927461	-0.0565464	0.954907	0.966058	chr11	85976623	85976682	ENSG00000073921	ENST00000532317	PICALM	PICALM-219	18	41344.5	41223.5	38676.7	42620.9	41955.8	36234.6
ENSE00003690111	38896.4	-0.00524446	0.0927461	-0.0565464	0.954907	0.966058	chr11	85976623	85976682	ENSG00000073921	ENST00000526961	PICALM	PICALM-207	8	41344.5	41223.5	38676.7	42620.9	41955.8	36234.6
ENSE00003690111	38896.4	-0.00524446	0.0927461	-0.0565464	0.954907	0.966058	chr11	85976623	85976682	ENSG00000073921	ENST00000530692	PICALM	PICALM-214	7	41344.5	41223.5	38676.7	42620.9	41955.8	36234.6
ENSE00003690111	38896.4	-0.00524446	0.0927461	-0.0565464	0.954907	0.966058	chr11	85976623	85976682	ENSG00000073921	ENST00000528398	PICALM	PICALM-209	17	41344.5	41223.5	38676.7	42620.9	41955.8	36234.6
ENSE00003690111	38896.4	-0.00524446	0.0927461	-0.0565464	0.954907	0.966058	chr11	85976623	85976682	ENSG00000073921	ENST00000529760	PICALM	PICALM-212	9	41344.5	41223.5	38676.7	42620.9	41955.8	36234.6
ENSE00003690111	38896.4	-0.00524446	0.0927461	-0.0565464	0.954907	0.966058	chr11	85976623	85976682	ENSG00000073921	ENST00000393346	PICALM	PICALM-202	18	41344.5	41223.5	38676.7	42620.9	41955.8	36234.6
ENSE00002187778	39181.2	-0.00514737	0.0929062	-0.0554039	0.955817	0.966385	chr11	85976623	85977005	ENSG00000073921	ENST00000526548	PICALM	PICALM-205	1	41656.3	41581.7	38887.5	42917.9	42290.6	36488.6
ENSE00002177661	28978.2	0.0342884	0.107932	0.317686	0.750723	0.80394	chr11	85976649	85976682	ENSG00000073921	ENST00000530542	PICALM	PICALM-213	9	30363.8	30005.8	28382	31784	32219.9	26887.8
ENSE00001416869	512.998	0.432689	0.230622	1.87618	0.060631	0.0987145	chr11	85978070	85978093	ENSG00000073921	ENST00000529760	PICALM	PICALM-212	8	392.235	500.905	473.347	696.943	664.685	484.331
ENSE00001416869	512.998	0.432689	0.230622	1.87618	0.060631	0.0987145	chr11	85978070	85978093	ENSG00000073921	ENST00000526961	PICALM	PICALM-207	7	392.235	500.905	473.347	696.943	664.685	484.331
ENSE00001416869	512.998	0.432689	0.230622	1.87618	0.060631	0.0987145	chr11	85978070	85978093	ENSG00000073921	ENST00000530692	PICALM	PICALM-214	6	392.235	500.905	473.347	696.943	664.685	484.331
ENSE00001416869	512.998	0.432689	0.230622	1.87618	0.060631	0.0987145	chr11	85978070	85978093	ENSG00000073921	ENST00000532317	PICALM	PICALM-219	17	392.235	500.905	473.347	696.943	664.685	484.331
ENSE00002148067	517.082	0.428702	0.231024	1.85566	0.0635021	0.102777	chr11	85978070	85978715	ENSG00000073921	ENST00000526907	PICALM	PICALM-206	1	393.204	503.704	473.347	696.943	664.685	484.331
ENSE00000797897	60617.8	-0.106771	0.0979124	-1.09048	0.275502	0.366297	chr11	85981129	85981228	ENSG00000073921	ENST00000526033	PICALM	PICALM-204	17	65656.3	65072	61322	63651.4	62021.6	52683.4
ENSE00000797897	60617.8	-0.106771	0.0979124	-1.09048	0.275502	0.366297	chr11	85981129	85981228	ENSG00000073921	ENST00000529760	PICALM	PICALM-212	7	65656.3	65072	61322	63651.4	62021.6	52683.4
ENSE00000797897	60617.8	-0.106771	0.0979124	-1.09048	0.275502	0.366297	chr11	85981129	85981228	ENSG00000073921	ENST00000356360	PICALM	PICALM-201	17	65656.3	65072	61322	63651.4	62021.6	52683.4
ENSE00000797897	60617.8	-0.106771	0.0979124	-1.09048	0.275502	0.366297	chr11	85981129	85981228	ENSG00000073921	ENST00000532317	PICALM	PICALM-219	16	65656.3	65072	61322	63651.4	62021.6	52683.4
ENSE00000797897	60617.8	-0.106771	0.0979124	-1.09048	0.275502	0.366297	chr11	85981129	85981228	ENSG00000073921	ENST00000530692	PICALM	PICALM-214	5	65656.3	65072	61322	63651.4	62021.6	52683.4
ENSE00000797897	60617.8	-0.106771	0.0979124	-1.09048	0.275502	0.366297	chr11	85981129	85981228	ENSG00000073921	ENST00000530542	PICALM	PICALM-213	8	65656.3	65072	61322	63651.4	62021.6	52683.4
ENSE00000797897	60617.8	-0.106771	0.0979124	-1.09048	0.275502	0.366297	chr11	85981129	85981228	ENSG00000073921	ENST00000532603	PICALM	PICALM-220	4	65656.3	65072	61322	63651.4	62021.6	52683.4
ENSE00000797897	60617.8	-0.106771	0.0979124	-1.09048	0.275502	0.366297	chr11	85981129	85981228	ENSG00000073921	ENST00000526961	PICALM	PICALM-207	6	65656.3	65072	61322	63651.4	62021.6	52683.4
ENSE00000797897	60617.8	-0.106771	0.0979124	-1.09048	0.275502	0.366297	chr11	85981129	85981228	ENSG00000073921	ENST00000393346	PICALM	PICALM-202	17	65656.3	65072	61322	63651.4	62021.6	52683.4
ENSE00000797897	60617.8	-0.106771	0.0979124	-1.09048	0.275502	0.366297	chr11	85981129	85981228	ENSG00000073921	ENST00000529016	PICALM	PICALM-211	7	65656.3	65072	61322	63651.4	62021.6	52683.4
ENSE00000797897	60617.8	-0.106771	0.0979124	-1.09048	0.275502	0.366297	chr11	85981129	85981228	ENSG00000073921	ENST00000528398	PICALM	PICALM-209	16	65656.3	65072	61322	63651.4	62021.6	52683.4
ENSE00003764228	60617.8	-0.106771	0.0979124	-1.09048	0.275502	0.366297	chr11	85981129	85981228	ENSG00000073921	ENST00000630913	PICALM	PICALM-224	16	65656.3	65072	61322	63651.4	62021.6	52683.4
ENSE00002176727	47612.5	-0.122413	0.0982416	-1.24604	0.212748	0.295015	chr11	85981184	85981228	ENSG00000073921	ENST00000534375	PICALM	PICALM-222	3	51887.4	51358.2	48555.7	49628	48420.3	41409.8
ENSE00003485097	46366.6	-0.1707	0.105882	-1.61217	0.106924	0.162207	chr11	85981745	85981775	ENSG00000073921	ENST00000534375	PICALM	PICALM-222	2	51960	50735.1	48146	47483.5	47374.9	39156.3
ENSE00003485097	46366.6	-0.1707	0.105882	-1.61217	0.106924	0.162207	chr11	85981745	85981775	ENSG00000073921	ENST00000630913	PICALM	PICALM-224	15	51960	50735.1	48146	47483.5	47374.9	39156.3
ENSE00003557667	46366.6	-0.1707	0.105882	-1.61217	0.106924	0.162207	chr11	85981745	85981775	ENSG00000073921	ENST00000526033	PICALM	PICALM-204	16	51960	50735.1	48146	47483.5	47374.9	39156.3
ENSE00003557667	46366.6	-0.1707	0.105882	-1.61217	0.106924	0.162207	chr11	85981745	85981775	ENSG00000073921	ENST00000532603	PICALM	PICALM-220	3	51960	50735.1	48146	47483.5	47374.9	39156.3
ENSE00003557667	46366.6	-0.1707	0.105882	-1.61217	0.106924	0.162207	chr11	85981745	85981775	ENSG00000073921	ENST00000393346	PICALM	PICALM-202	16	51960	50735.1	48146	47483.5	47374.9	39156.3
ENSE00003557667	46366.6	-0.1707	0.105882	-1.61217	0.106924	0.162207	chr11	85981745	85981775	ENSG00000073921	ENST00000530542	PICALM	PICALM-213	7	51960	50735.1	48146	47483.5	47374.9	39156.3
ENSE00003557667	46366.6	-0.1707	0.105882	-1.61217	0.106924	0.162207	chr11	85981745	85981775	ENSG00000073921	ENST00000528398	PICALM	PICALM-209	15	51960	50735.1	48146	47483.5	47374.9	39156.3
ENSE00003557667	46366.6	-0.1707	0.105882	-1.61217	0.106924	0.162207	chr11	85981745	85981775	ENSG00000073921	ENST00000526961	PICALM	PICALM-207	5	51960	50735.1	48146	47483.5	47374.9	39156.3
ENSE00003557667	46366.6	-0.1707	0.105882	-1.61217	0.106924	0.162207	chr11	85981745	85981775	ENSG00000073921	ENST00000356360	PICALM	PICALM-201	16	51960	50735.1	48146	47483.5	47374.9	39156.3
ENSE00003557667	46366.6	-0.1707	0.105882	-1.61217	0.106924	0.162207	chr11	85981745	85981775	ENSG00000073921	ENST00000529016	PICALM	PICALM-211	6	51960	50735.1	48146	47483.5	47374.9	39156.3
ENSE00003557667	46366.6	-0.1707	0.105882	-1.61217	0.106924	0.162207	chr11	85981745	85981775	ENSG00000073921	ENST00000532317	PICALM	PICALM-219	15	51960	50735.1	48146	47483.5	47374.9	39156.3
ENSE00003557667	46366.6	-0.1707	0.105882	-1.61217	0.106924	0.162207	chr11	85981745	85981775	ENSG00000073921	ENST00000530692	PICALM	PICALM-214	4	51960	50735.1	48146	47483.5	47374.9	39156.3
ENSE00003557667	46366.6	-0.1707	0.105882	-1.61217	0.106924	0.162207	chr11	85981745	85981775	ENSG00000073921	ENST00000529760	PICALM	PICALM-212	6	51960	50735.1	48146	47483.5	47374.9	39156.3
ENSE00002191427	84059.3	-0.150947	0.104347	-1.44659	0.148013	0.214841	chr11	85981872	85981988	ENSG00000073921	ENST00000526961	PICALM	PICALM-207	4	91180.6	92059.3	85098.8	87257.2	84979.2	69452
ENSE00002191427	84059.3	-0.150947	0.104347	-1.44659	0.148013	0.214841	chr11	85981872	85981988	ENSG00000073921	ENST00000530542	PICALM	PICALM-213	6	91180.6	92059.3	85098.8	87257.2	84979.2	69452
ENSE00002191427	84059.3	-0.150947	0.104347	-1.44659	0.148013	0.214841	chr11	85981872	85981988	ENSG00000073921	ENST00000529760	PICALM	PICALM-212	5	91180.6	92059.3	85098.8	87257.2	84979.2	69452
ENSE00002191427	84059.3	-0.150947	0.104347	-1.44659	0.148013	0.214841	chr11	85981872	85981988	ENSG00000073921	ENST00000532603	PICALM	PICALM-220	2	91180.6	92059.3	85098.8	87257.2	84979.2	69452
ENSE00002191427	84059.3	-0.150947	0.104347	-1.44659	0.148013	0.214841	chr11	85981872	85981988	ENSG00000073921	ENST00000530692	PICALM	PICALM-214	3	91180.6	92059.3	85098.8	87257.2	84979.2	69452
ENSE00001328176	86676.2	-0.140722	0.105315	-1.3362	0.181484	0.257965	chr11	85981872	85982003	ENSG00000073921	ENST00000526033	PICALM	PICALM-204	15	93939.8	94249.5	87112.3	90118.1	88111.7	71493.5
ENSE00001328176	86676.2	-0.140722	0.105315	-1.3362	0.181484	0.257965	chr11	85981872	85982003	ENSG00000073921	ENST00000393346	PICALM	PICALM-202	15	93939.8	94249.5	87112.3	90118.1	88111.7	71493.5
ENSE00001328176	86676.2	-0.140722	0.105315	-1.3362	0.181484	0.257965	chr11	85981872	85982003	ENSG00000073921	ENST00000532317	PICALM	PICALM-219	14	93939.8	94249.5	87112.3	90118.1	88111.7	71493.5
ENSE00001328176	86676.2	-0.140722	0.105315	-1.3362	0.181484	0.257965	chr11	85981872	85982003	ENSG00000073921	ENST00000528398	PICALM	PICALM-209	14	93939.8	94249.5	87112.3	90118.1	88111.7	71493.5
ENSE00001328176	86676.2	-0.140722	0.105315	-1.3362	0.181484	0.257965	chr11	85981872	85982003	ENSG00000073921	ENST00000529016	PICALM	PICALM-211	5	93939.8	94249.5	87112.3	90118.1	88111.7	71493.5
ENSE00001328176	86676.2	-0.140722	0.105315	-1.3362	0.181484	0.257965	chr11	85981872	85982003	ENSG00000073921	ENST00000356360	PICALM	PICALM-201	15	93939.8	94249.5	87112.3	90118.1	88111.7	71493.5
ENSE00003771194	86676.2	-0.140722	0.105315	-1.3362	0.181484	0.257965	chr11	85981872	85982003	ENSG00000073921	ENST00000630913	PICALM	PICALM-224	14	93939.8	94249.5	87112.3	90118.1	88111.7	71493.5
ENSE00002194519	86812.4	-0.140357	0.106599	-1.31668	0.187944	0.265999	chr11	85981872	85982185	ENSG00000073921	ENST00000534375	PICALM	PICALM-222	1	93967.9	94309.2	87141.8	90206.1	88129	71557.4
ENSE00000989277	84154.3	-0.13968	0.0974865	-1.43281	0.151912	0.219532	chr11	85983866	85983973	ENSG00000073921	ENST00000356360	PICALM	PICALM-201	14	90273.2	94629.1	84182.8	89123	84436.1	70702.6
ENSE00000989277	84154.3	-0.13968	0.0974865	-1.43281	0.151912	0.219532	chr11	85983866	85983973	ENSG00000073921	ENST00000393346	PICALM	PICALM-202	14	90273.2	94629.1	84182.8	89123	84436.1	70702.6
ENSE00000989277	84154.3	-0.13968	0.0974865	-1.43281	0.151912	0.219532	chr11	85983866	85983973	ENSG00000073921	ENST00000526033	PICALM	PICALM-204	14	90273.2	94629.1	84182.8	89123	84436.1	70702.6
ENSE00000989277	84154.3	-0.13968	0.0974865	-1.43281	0.151912	0.219532	chr11	85983866	85983973	ENSG00000073921	ENST00000532317	PICALM	PICALM-219	13	90273.2	94629.1	84182.8	89123	84436.1	70702.6
ENSE00000989277	84154.3	-0.13968	0.0974865	-1.43281	0.151912	0.219532	chr11	85983866	85983973	ENSG00000073921	ENST00000530692	PICALM	PICALM-214	2	90273.2	94629.1	84182.8	89123	84436.1	70702.6
ENSE00000989277	84154.3	-0.13968	0.0974865	-1.43281	0.151912	0.219532	chr11	85983866	85983973	ENSG00000073921	ENST00000529760	PICALM	PICALM-212	4	90273.2	94629.1	84182.8	89123	84436.1	70702.6
ENSE00000989277	84154.3	-0.13968	0.0974865	-1.43281	0.151912	0.219532	chr11	85983866	85983973	ENSG00000073921	ENST00000530542	PICALM	PICALM-213	5	90273.2	94629.1	84182.8	89123	84436.1	70702.6
ENSE00000989277	84154.3	-0.13968	0.0974865	-1.43281	0.151912	0.219532	chr11	85983866	85983973	ENSG00000073921	ENST00000526961	PICALM	PICALM-207	3	90273.2	94629.1	84182.8	89123	84436.1	70702.6
ENSE00000989277	84154.3	-0.13968	0.0974865	-1.43281	0.151912	0.219532	chr11	85983866	85983973	ENSG00000073921	ENST00000529016	PICALM	PICALM-211	4	90273.2	94629.1	84182.8	89123	84436.1	70702.6
ENSE00000989277	84154.3	-0.13968	0.0974865	-1.43281	0.151912	0.219532	chr11	85983866	85983973	ENSG00000073921	ENST00000528398	PICALM	PICALM-209	13	90273.2	94629.1	84182.8	89123	84436.1	70702.6
ENSE00003771218	84154.3	-0.13968	0.0974865	-1.43281	0.151912	0.219532	chr11	85983866	85983973	ENSG00000073921	ENST00000630913	PICALM	PICALM-224	13	90273.2	94629.1	84182.8	89123	84436.1	70702.6
ENSE00002180758	51507.8	-0.134887	0.10164	-1.3271	0.184474	0.261312	chr11	85983866	85983900	ENSG00000073921	ENST00000532603	PICALM	PICALM-220	1	56178.7	56706.8	51844.4	54641.4	52321.6	43070.4
ENSE00002201493	92653.7	-0.349151	0.100706	-3.46702	0.000526272	0.00212836	chr11	85990250	85990378	ENSG00000073921	ENST00000526033	PICALM	PICALM-204	13	104758	114334	101599	92726.5	87020.4	72017.3
ENSE00002201493	92653.7	-0.349151	0.100706	-3.46702	0.000526272	0.00212836	chr11	85990250	85990378	ENSG00000073921	ENST00000526961	PICALM	PICALM-207	2	104758	114334	101599	92726.5	87020.4	72017.3
ENSE00000989276	95643.4	-0.344893	0.100864	-3.41938	0.000627636	0.00250143	chr11	85990250	85990399	ENSG00000073921	ENST00000393346	PICALM	PICALM-202	13	107929	117718	104440	95509.7	90219.8	74177
ENSE00000989276	95643.4	-0.344893	0.100864	-3.41938	0.000627636	0.00250143	chr11	85990250	85990399	ENSG00000073921	ENST00000530542	PICALM	PICALM-213	4	107929	117718	104440	95509.7	90219.8	74177
ENSE00000989276	95643.4	-0.344893	0.100864	-3.41938	0.000627636	0.00250143	chr11	85990250	85990399	ENSG00000073921	ENST00000356360	PICALM	PICALM-201	13	107929	117718	104440	95509.7	90219.8	74177
ENSE00003772526	95643.4	-0.344893	0.100864	-3.41938	0.000627636	0.00250143	chr11	85990250	85990399	ENSG00000073921	ENST00000630913	PICALM	PICALM-224	12	107929	117718	104440	95509.7	90219.8	74177
ENSE00002524723	38622.1	-0.339438	0.126276	-2.68807	0.00718669	0.017577	chr11	85990250	85990258	ENSG00000073921	ENST00000530692	PICALM	PICALM-214	1	44337.1	49463.7	42365.7	39571.5	38643.5	29410.2
ENSE00000797902	150315	-0.11329	0.081651	-1.38749	0.165294	0.236585	chr11	85996826	85996929	ENSG00000073921	ENST00000393346	PICALM	PICALM-202	12	155492	163700	155536	157894	152089	128900
ENSE00000797902	150315	-0.11329	0.081651	-1.38749	0.165294	0.236585	chr11	85996826	85996929	ENSG00000073921	ENST00000529760	PICALM	PICALM-212	3	155492	163700	155536	157894	152089	128900
ENSE00000797902	150315	-0.11329	0.081651	-1.38749	0.165294	0.236585	chr11	85996826	85996929	ENSG00000073921	ENST00000532317	PICALM	PICALM-219	12	155492	163700	155536	157894	152089	128900
ENSE00000797902	150315	-0.11329	0.081651	-1.38749	0.165294	0.236585	chr11	85996826	85996929	ENSG00000073921	ENST00000526961	PICALM	PICALM-207	1	155492	163700	155536	157894	152089	128900
ENSE00000797902	150315	-0.11329	0.081651	-1.38749	0.165294	0.236585	chr11	85996826	85996929	ENSG00000073921	ENST00000530542	PICALM	PICALM-213	3	155492	163700	155536	157894	152089	128900
ENSE00000797902	150315	-0.11329	0.081651	-1.38749	0.165294	0.236585	chr11	85996826	85996929	ENSG00000073921	ENST00000526033	PICALM	PICALM-204	12	155492	163700	155536	157894	152089	128900
ENSE00000797902	150315	-0.11329	0.081651	-1.38749	0.165294	0.236585	chr11	85996826	85996929	ENSG00000073921	ENST00000528398	PICALM	PICALM-209	12	155492	163700	155536	157894	152089	128900
ENSE00000797902	150315	-0.11329	0.081651	-1.38749	0.165294	0.236585	chr11	85996826	85996929	ENSG00000073921	ENST00000529016	PICALM	PICALM-211	3	155492	163700	155536	157894	152089	128900
ENSE00000797902	150315	-0.11329	0.081651	-1.38749	0.165294	0.236585	chr11	85996826	85996929	ENSG00000073921	ENST00000356360	PICALM	PICALM-201	12	155492	163700	155536	157894	152089	128900
ENSE00003774427	150315	-0.11329	0.081651	-1.38749	0.165294	0.236585	chr11	85996826	85996929	ENSG00000073921	ENST00000630913	PICALM	PICALM-224	11	155492	163700	155536	157894	152089	128900
ENSE00000989275	237291	-0.0960435	0.0954332	-1.00639	0.314226	0.406457	chr11	86000643	86000779	ENSG00000073921	ENST00000532317	PICALM	PICALM-219	11	243331	252225	236710	247562	233576	203972
ENSE00000989275	237291	-0.0960435	0.0954332	-1.00639	0.314226	0.406457	chr11	86000643	86000779	ENSG00000073921	ENST00000529760	PICALM	PICALM-212	2	243331	252225	236710	247562	233576	203972
ENSE00000989275	237291	-0.0960435	0.0954332	-1.00639	0.314226	0.406457	chr11	86000643	86000779	ENSG00000073921	ENST00000356360	PICALM	PICALM-201	11	243331	252225	236710	247562	233576	203972
ENSE00000989275	237291	-0.0960435	0.0954332	-1.00639	0.314226	0.406457	chr11	86000643	86000779	ENSG00000073921	ENST00000526033	PICALM	PICALM-204	11	243331	252225	236710	247562	233576	203972
ENSE00000989275	237291	-0.0960435	0.0954332	-1.00639	0.314226	0.406457	chr11	86000643	86000779	ENSG00000073921	ENST00000529016	PICALM	PICALM-211	2	243331	252225	236710	247562	233576	203972
ENSE00000989275	237291	-0.0960435	0.0954332	-1.00639	0.314226	0.406457	chr11	86000643	86000779	ENSG00000073921	ENST00000393346	PICALM	PICALM-202	11	243331	252225	236710	247562	233576	203972
ENSE00000989275	237291	-0.0960435	0.0954332	-1.00639	0.314226	0.406457	chr11	86000643	86000779	ENSG00000073921	ENST00000530542	PICALM	PICALM-213	2	243331	252225	236710	247562	233576	203972
ENSE00000989275	237291	-0.0960435	0.0954332	-1.00639	0.314226	0.406457	chr11	86000643	86000779	ENSG00000073921	ENST00000528398	PICALM	PICALM-209	11	243331	252225	236710	247562	233576	203972
ENSE00003766457	237291	-0.0960435	0.0954332	-1.00639	0.314226	0.406457	chr11	86000643	86000779	ENSG00000073921	ENST00000630913	PICALM	PICALM-224	10	243331	252225	236710	247562	233576	203972
ENSE00002147728	221582	-0.0884328	0.0748724	-1.18111	0.237558	0.32345	chr11	86000681	86000779	ENSG00000073921	ENST00000534412	PICALM	PICALM-223	8	229113	236230	223514	232762	222541	192608
ENSE00002162636	204515	-0.0889615	0.0801416	-1.11005	0.266976	0.355546	chr11	86001031	86001158	ENSG00000073921	ENST00000533350	PICALM	PICALM-221	2	213843	219970	204839	219386	202965	178118
ENSE00002187219	196689	-0.0926038	0.0804055	-1.15171	0.24944	0.33654	chr11	86001035	86001141	ENSG00000073921	ENST00000529016	PICALM	PICALM-211	1	205848	212083	197588	211323	194443	171493
ENSE00003563547	204515	-0.0889615	0.0801429	-1.11004	0.266984	0.355546	chr11	86001035	86001158	ENSG00000073921	ENST00000534412	PICALM	PICALM-223	7	213843	219970	204839	219386	202965	178118
ENSE00003563547	204515	-0.0889615	0.0801429	-1.11004	0.266984	0.355546	chr11	86001035	86001158	ENSG00000073921	ENST00000630913	PICALM	PICALM-224	9	213843	219970	204839	219386	202965	178118
ENSE00003566645	204515	-0.0889615	0.0801429	-1.11004	0.266984	0.355546	chr11	86001035	86001158	ENSG00000073921	ENST00000526033	PICALM	PICALM-204	10	213843	219970	204839	219386	202965	178118
ENSE00003566645	204515	-0.0889615	0.0801429	-1.11004	0.266984	0.355546	chr11	86001035	86001158	ENSG00000073921	ENST00000532317	PICALM	PICALM-219	10	213843	219970	204839	219386	202965	178118
ENSE00003566645	204515	-0.0889615	0.0801429	-1.11004	0.266984	0.355546	chr11	86001035	86001158	ENSG00000073921	ENST00000530542	PICALM	PICALM-213	1	213843	219970	204839	219386	202965	178118
ENSE00003566645	204515	-0.0889615	0.0801429	-1.11004	0.266984	0.355546	chr11	86001035	86001158	ENSG00000073921	ENST00000356360	PICALM	PICALM-201	10	213843	219970	204839	219386	202965	178118
ENSE00003566645	204515	-0.0889615	0.0801429	-1.11004	0.266984	0.355546	chr11	86001035	86001158	ENSG00000073921	ENST00000393346	PICALM	PICALM-202	10	213843	219970	204839	219386	202965	178118
ENSE00003566645	204515	-0.0889615	0.0801429	-1.11004	0.266984	0.355546	chr11	86001035	86001158	ENSG00000073921	ENST00000529760	PICALM	PICALM-212	1	213843	219970	204839	219386	202965	178118
ENSE00003566645	204515	-0.0889615	0.0801429	-1.11004	0.266984	0.355546	chr11	86001035	86001158	ENSG00000073921	ENST00000528398	PICALM	PICALM-209	10	213843	219970	204839	219386	202965	178118
ENSE00002166367	99411	-0.165168	0.0918074	-1.79907	0.0720084	0.114297	chr11	86003366	86003778	ENSG00000073921	ENST00000533350	PICALM	PICALM-221	1	109228	112210	102553	108442	92075	88431.1
ENSE00003539741	99251.9	-0.165345	0.0925746	-1.78607	0.0740876	0.117145	chr11	86003366	86003451	ENSG00000073921	ENST00000534412	PICALM	PICALM-223	6	109164	112108	102344	108253	91988.2	88336.5
ENSE00003539741	99251.9	-0.165345	0.0925746	-1.78607	0.0740876	0.117145	chr11	86003366	86003451	ENSG00000073921	ENST00000630913	PICALM	PICALM-224	8	109164	112108	102344	108253	91988.2	88336.5
ENSE00003594776	99251.9	-0.165345	0.0925746	-1.78607	0.0740876	0.117145	chr11	86003366	86003451	ENSG00000073921	ENST00000393346	PICALM	PICALM-202	9	109164	112108	102344	108253	91988.2	88336.5
ENSE00003594776	99251.9	-0.165345	0.0925746	-1.78607	0.0740876	0.117145	chr11	86003366	86003451	ENSG00000073921	ENST00000528398	PICALM	PICALM-209	9	109164	112108	102344	108253	91988.2	88336.5
ENSE00003594776	99251.9	-0.165345	0.0925746	-1.78607	0.0740876	0.117145	chr11	86003366	86003451	ENSG00000073921	ENST00000532317	PICALM	PICALM-219	9	109164	112108	102344	108253	91988.2	88336.5
ENSE00003594776	99251.9	-0.165345	0.0925746	-1.78607	0.0740876	0.117145	chr11	86003366	86003451	ENSG00000073921	ENST00000356360	PICALM	PICALM-201	9	109164	112108	102344	108253	91988.2	88336.5
ENSE00003594776	99251.9	-0.165345	0.0925746	-1.78607	0.0740876	0.117145	chr11	86003366	86003451	ENSG00000073921	ENST00000526033	PICALM	PICALM-204	9	109164	112108	102344	108253	91988.2	88336.5
ENSE00002173256	57586.7	-0.207035	0.104601	-1.97929	0.0477839	0.0813364	chr11	86007369	86007583	ENSG00000073921	ENST00000531771	PICALM	PICALM-216	5	63179.9	66310.7	60855.7	62642.6	53078.1	49183.6
ENSE00003607692	57496.2	-0.206459	0.104644	-1.97296	0.0485002	0.0822324	chr11	86007542	86007583	ENSG00000073921	ENST00000393346	PICALM	PICALM-202	8	63103.4	66202.5	60732.1	62521.5	53073.1	49108.3
ENSE00003607692	57496.2	-0.206459	0.104644	-1.97296	0.0485002	0.0822324	chr11	86007542	86007583	ENSG00000073921	ENST00000528398	PICALM	PICALM-209	8	63103.4	66202.5	60732.1	62521.5	53073.1	49108.3
ENSE00003607692	57496.2	-0.206459	0.104644	-1.97296	0.0485002	0.0822324	chr11	86007542	86007583	ENSG00000073921	ENST00000526033	PICALM	PICALM-204	8	63103.4	66202.5	60732.1	62521.5	53073.1	49108.3
ENSE00003607692	57496.2	-0.206459	0.104644	-1.97296	0.0485002	0.0822324	chr11	86007542	86007583	ENSG00000073921	ENST00000532317	PICALM	PICALM-219	8	63103.4	66202.5	60732.1	62521.5	53073.1	49108.3
ENSE00003607692	57496.2	-0.206459	0.104644	-1.97296	0.0485002	0.0822324	chr11	86007542	86007583	ENSG00000073921	ENST00000356360	PICALM	PICALM-201	8	63103.4	66202.5	60732.1	62521.5	53073.1	49108.3
ENSE00003634753	57496.2	-0.206459	0.104644	-1.97296	0.0485002	0.0822324	chr11	86007542	86007583	ENSG00000073921	ENST00000534412	PICALM	PICALM-223	5	63103.4	66202.5	60732.1	62521.5	53073.1	49108.3
ENSE00003634753	57496.2	-0.206459	0.104644	-1.97296	0.0485002	0.0822324	chr11	86007542	86007583	ENSG00000073921	ENST00000630913	PICALM	PICALM-224	7	63103.4	66202.5	60732.1	62521.5	53073.1	49108.3
ENSE00003607483	65779.6	-0.303347	0.0906648	-3.3458	0.000820446	0.00314059	chr11	86011030	86011136	ENSG00000073921	ENST00000532317	PICALM	PICALM-219	7	75024.4	77431.4	73320.5	69476	58832.1	54659.3
ENSE00003607483	65779.6	-0.303347	0.0906648	-3.3458	0.000820446	0.00314059	chr11	86011030	86011136	ENSG00000073921	ENST00000356360	PICALM	PICALM-201	7	75024.4	77431.4	73320.5	69476	58832.1	54659.3
ENSE00003607483	65779.6	-0.303347	0.0906648	-3.3458	0.000820446	0.00314059	chr11	86011030	86011136	ENSG00000073921	ENST00000393346	PICALM	PICALM-202	7	75024.4	77431.4	73320.5	69476	58832.1	54659.3
ENSE00003607483	65779.6	-0.303347	0.0906648	-3.3458	0.000820446	0.00314059	chr11	86011030	86011136	ENSG00000073921	ENST00000528398	PICALM	PICALM-209	7	75024.4	77431.4	73320.5	69476	58832.1	54659.3
ENSE00003607483	65779.6	-0.303347	0.0906648	-3.3458	0.000820446	0.00314059	chr11	86011030	86011136	ENSG00000073921	ENST00000526033	PICALM	PICALM-204	7	75024.4	77431.4	73320.5	69476	58832.1	54659.3
ENSE00003665069	65779.6	-0.303347	0.0906648	-3.3458	0.000820446	0.00314059	chr11	86011030	86011136	ENSG00000073921	ENST00000630913	PICALM	PICALM-224	6	75024.4	77431.4	73320.5	69476	58832.1	54659.3
ENSE00003665069	65779.6	-0.303347	0.0906648	-3.3458	0.000820446	0.00314059	chr11	86011030	86011136	ENSG00000073921	ENST00000534412	PICALM	PICALM-223	4	75024.4	77431.4	73320.5	69476	58832.1	54659.3
ENSE00003665069	65779.6	-0.303347	0.0906648	-3.3458	0.000820446	0.00314059	chr11	86011030	86011136	ENSG00000073921	ENST00000531771	PICALM	PICALM-216	4	75024.4	77431.4	73320.5	69476	58832.1	54659.3
ENSE00002165015	36595.9	-0.372086	0.120337	-3.09202	0.00198798	0.00616237	chr11	86011112	86011136	ENSG00000073921	ENST00000531558	PICALM	PICALM-215	4	44064	44515.3	43153.5	38798	32797.7	30192.3
ENSE00003629774	126600	-0.305003	0.0950588	-3.20858	0.00133394	0.00459343	chr11	86012281	86012392	ENSG00000073921	ENST00000531558	PICALM	PICALM-215	3	146661	146349	143397	135614	109828	107807
ENSE00003629774	126600	-0.305003	0.0950588	-3.20858	0.00133394	0.00459343	chr11	86012281	86012392	ENSG00000073921	ENST00000531771	PICALM	PICALM-216	3	146661	146349	143397	135614	109828	107807
ENSE00003629774	126600	-0.305003	0.0950588	-3.20858	0.00133394	0.00459343	chr11	86012281	86012392	ENSG00000073921	ENST00000630913	PICALM	PICALM-224	5	146661	146349	143397	135614	109828	107807
ENSE00003629774	126600	-0.305003	0.0950588	-3.20858	0.00133394	0.00459343	chr11	86012281	86012392	ENSG00000073921	ENST00000534412	PICALM	PICALM-223	3	146661	146349	143397	135614	109828	107807
ENSE00003790712	126600	-0.305003	0.0950588	-3.20858	0.00133394	0.00459343	chr11	86012281	86012392	ENSG00000073921	ENST00000531930	PICALM	PICALM-217	7	146661	146349	143397	135614	109828	107807
ENSE00003790712	126600	-0.305003	0.0950588	-3.20858	0.00133394	0.00459343	chr11	86012281	86012392	ENSG00000073921	ENST00000393346	PICALM	PICALM-202	6	146661	146349	143397	135614	109828	107807
ENSE00003790712	126600	-0.305003	0.0950588	-3.20858	0.00133394	0.00459343	chr11	86012281	86012392	ENSG00000073921	ENST00000526033	PICALM	PICALM-204	6	146661	146349	143397	135614	109828	107807
ENSE00003790712	126600	-0.305003	0.0950588	-3.20858	0.00133394	0.00459343	chr11	86012281	86012392	ENSG00000073921	ENST00000528398	PICALM	PICALM-209	6	146661	146349	143397	135614	109828	107807
ENSE00003790712	126600	-0.305003	0.0950588	-3.20858	0.00133394	0.00459343	chr11	86012281	86012392	ENSG00000073921	ENST00000532317	PICALM	PICALM-219	6	146661	146349	143397	135614	109828	107807
ENSE00003790712	126600	-0.305003	0.0950588	-3.20858	0.00133394	0.00459343	chr11	86012281	86012392	ENSG00000073921	ENST00000356360	PICALM	PICALM-201	6	146661	146349	143397	135614	109828	107807
ENSE00002151753	113650	-0.299208	0.0974391	-3.07072	0.00213543	0.0065333	chr11	86012329	86012392	ENSG00000073921	ENST00000532041	PICALM	PICALM-218	5	132676	131123	128600	122589	99185.6	97130.6
ENSE00002196185	109151	-0.298371	0.0990222	-3.01317	0.00258531	0.00769514	chr11	86012343	86012392	ENSG00000073921	ENST00000525162	PICALM	PICALM-203	6	127294	125787	123674	117604	95056.2	93708.8
ENSE00003626358	145440	-0.314967	0.101033	-3.11747	0.00182412	0.00577403	chr11	86014870	86014963	ENSG00000073921	ENST00000531771	PICALM	PICALM-216	2	173287	167258	162077	156964	123893	123187
ENSE00003626358	145440	-0.314967	0.101033	-3.11747	0.00182412	0.00577403	chr11	86014870	86014963	ENSG00000073921	ENST00000630913	PICALM	PICALM-224	4	173287	167258	162077	156964	123893	123187
ENSE00003626358	145440	-0.314967	0.101033	-3.11747	0.00182412	0.00577403	chr11	86014870	86014963	ENSG00000073921	ENST00000532041	PICALM	PICALM-218	4	173287	167258	162077	156964	123893	123187
ENSE00003671458	145440	-0.314967	0.101033	-3.11747	0.00182412	0.00577403	chr11	86014870	86014963	ENSG00000073921	ENST00000531558	PICALM	PICALM-215	2	173287	167258	162077	156964	123893	123187
ENSE00003671458	145440	-0.314967	0.101033	-3.11747	0.00182412	0.00577403	chr11	86014870	86014963	ENSG00000073921	ENST00000534412	PICALM	PICALM-223	2	173287	167258	162077	156964	123893	123187
ENSE00003791596	145440	-0.314967	0.101033	-3.11747	0.00182412	0.00577403	chr11	86014870	86014963	ENSG00000073921	ENST00000526033	PICALM	PICALM-204	5	173287	167258	162077	156964	123893	123187
ENSE00003791596	145440	-0.314967	0.101033	-3.11747	0.00182412	0.00577403	chr11	86014870	86014963	ENSG00000073921	ENST00000531930	PICALM	PICALM-217	6	173287	167258	162077	156964	123893	123187
ENSE00003791596	145440	-0.314967	0.101033	-3.11747	0.00182412	0.00577403	chr11	86014870	86014963	ENSG00000073921	ENST00000525162	PICALM	PICALM-203	5	173287	167258	162077	156964	123893	123187
ENSE00003791596	145440	-0.314967	0.101033	-3.11747	0.00182412	0.00577403	chr11	86014870	86014963	ENSG00000073921	ENST00000528398	PICALM	PICALM-209	5	173287	167258	162077	156964	123893	123187
ENSE00003791596	145440	-0.314967	0.101033	-3.11747	0.00182412	0.00577403	chr11	86014870	86014963	ENSG00000073921	ENST00000393346	PICALM	PICALM-202	5	173287	167258	162077	156964	123893	123187
ENSE00003791596	145440	-0.314967	0.101033	-3.11747	0.00182412	0.00577403	chr11	86014870	86014963	ENSG00000073921	ENST00000528256	PICALM	PICALM-208	6	173287	167258	162077	156964	123893	123187
ENSE00003791596	145440	-0.314967	0.101033	-3.11747	0.00182412	0.00577403	chr11	86014870	86014963	ENSG00000073921	ENST00000356360	PICALM	PICALM-201	5	173287	167258	162077	156964	123893	123187
ENSE00003791596	145440	-0.314967	0.101033	-3.11747	0.00182412	0.00577403	chr11	86014870	86014963	ENSG00000073921	ENST00000532317	PICALM	PICALM-219	5	173287	167258	162077	156964	123893	123187
ENSE00003468413	166033	-0.332027	0.105305	-3.15302	0.00161593	0.00533029	chr11	86022367	86022469	ENSG00000073921	ENST00000531771	PICALM	PICALM-216	1	200079	187361	185029	176507	137507	140769
ENSE00003536057	166033	-0.332027	0.105305	-3.15302	0.00161593	0.00533029	chr11	86022367	86022469	ENSG00000073921	ENST00000356360	PICALM	PICALM-201	4	200079	187361	185029	176507	137507	140769
ENSE00003536057	166033	-0.332027	0.105305	-3.15302	0.00161593	0.00533029	chr11	86022367	86022469	ENSG00000073921	ENST00000531930	PICALM	PICALM-217	5	200079	187361	185029	176507	137507	140769
ENSE00003536057	166033	-0.332027	0.105305	-3.15302	0.00161593	0.00533029	chr11	86022367	86022469	ENSG00000073921	ENST00000525162	PICALM	PICALM-203	4	200079	187361	185029	176507	137507	140769
ENSE00003536057	166033	-0.332027	0.105305	-3.15302	0.00161593	0.00533029	chr11	86022367	86022469	ENSG00000073921	ENST00000528256	PICALM	PICALM-208	5	200079	187361	185029	176507	137507	140769
ENSE00003536057	166033	-0.332027	0.105305	-3.15302	0.00161593	0.00533029	chr11	86022367	86022469	ENSG00000073921	ENST00000526033	PICALM	PICALM-204	4	200079	187361	185029	176507	137507	140769
ENSE00003536057	166033	-0.332027	0.105305	-3.15302	0.00161593	0.00533029	chr11	86022367	86022469	ENSG00000073921	ENST00000393346	PICALM	PICALM-202	4	200079	187361	185029	176507	137507	140769
ENSE00003536057	166033	-0.332027	0.105305	-3.15302	0.00161593	0.00533029	chr11	86022367	86022469	ENSG00000073921	ENST00000532317	PICALM	PICALM-219	4	200079	187361	185029	176507	137507	140769
ENSE00003536057	166033	-0.332027	0.105305	-3.15302	0.00161593	0.00533029	chr11	86022367	86022469	ENSG00000073921	ENST00000528398	PICALM	PICALM-209	4	200079	187361	185029	176507	137507	140769
ENSE00003680827	166033	-0.332027	0.105305	-3.15302	0.00161593	0.00533029	chr11	86022367	86022469	ENSG00000073921	ENST00000532041	PICALM	PICALM-218	3	200079	187361	185029	176507	137507	140769
ENSE00003680827	166033	-0.332027	0.105305	-3.15302	0.00161593	0.00533029	chr11	86022367	86022469	ENSG00000073921	ENST00000630913	PICALM	PICALM-224	3	200079	187361	185029	176507	137507	140769
ENSE00002179482	161939	-0.325971	0.104603	-3.11626	0.00183159	0.00578655	chr11	86022378	86022469	ENSG00000073921	ENST00000528411	PICALM	PICALM-210	6	194868	182470	180439	172344	135106	137526
ENSE00002154786	2419.55	-0.177751	0.148615	-1.19605	0.231677	0.317516	chr11	86023416	86023541	ENSG00000073921	ENST00000528411	PICALM	PICALM-210	5	2839.59	2739.59	2675.23	2506.71	2362.36	2428.66
ENSE00003518461	123167	-0.3341	0.103021	-3.24304	0.00118262	0.00414928	chr11	86026292	86026367	ENSG00000073921	ENST00000528411	PICALM	PICALM-210	4	147903	139849	139669	131341	103543	104182
ENSE00003683006	123167	-0.3341	0.103021	-3.24304	0.00118262	0.00414928	chr11	86026292	86026367	ENSG00000073921	ENST00000531930	PICALM	PICALM-217	4	147903	139849	139669	131341	103543	104182
ENSE00003683006	123167	-0.3341	0.103021	-3.24304	0.00118262	0.00414928	chr11	86026292	86026367	ENSG00000073921	ENST00000525162	PICALM	PICALM-203	3	147903	139849	139669	131341	103543	104182
ENSE00003683006	123167	-0.3341	0.103021	-3.24304	0.00118262	0.00414928	chr11	86026292	86026367	ENSG00000073921	ENST00000526033	PICALM	PICALM-204	3	147903	139849	139669	131341	103543	104182
ENSE00003683006	123167	-0.3341	0.103021	-3.24304	0.00118262	0.00414928	chr11	86026292	86026367	ENSG00000073921	ENST00000528256	PICALM	PICALM-208	4	147903	139849	139669	131341	103543	104182
ENSE00003683006	123167	-0.3341	0.103021	-3.24304	0.00118262	0.00414928	chr11	86026292	86026367	ENSG00000073921	ENST00000528398	PICALM	PICALM-209	3	147903	139849	139669	131341	103543	104182
ENSE00003683006	123167	-0.3341	0.103021	-3.24304	0.00118262	0.00414928	chr11	86026292	86026367	ENSG00000073921	ENST00000532317	PICALM	PICALM-219	3	147903	139849	139669	131341	103543	104182
ENSE00003683006	123167	-0.3341	0.103021	-3.24304	0.00118262	0.00414928	chr11	86026292	86026367	ENSG00000073921	ENST00000393346	PICALM	PICALM-202	3	147903	139849	139669	131341	103543	104182
ENSE00003683006	123167	-0.3341	0.103021	-3.24304	0.00118262	0.00414928	chr11	86026292	86026367	ENSG00000073921	ENST00000356360	PICALM	PICALM-201	3	147903	139849	139669	131341	103543	104182
ENSE00003652321	102704	-0.341175	0.109706	-3.10989	0.00187154	0.00585657	chr11	86031469	86031611	ENSG00000073921	ENST00000531930	PICALM	PICALM-217	3	123063	118710	117417	110369	82934.3	90240.5
ENSE00003652321	102704	-0.341175	0.109706	-3.10989	0.00187154	0.00585657	chr11	86031469	86031611	ENSG00000073921	ENST00000526033	PICALM	PICALM-204	2	123063	118710	117417	110369	82934.3	90240.5
ENSE00003652321	102704	-0.341175	0.109706	-3.10989	0.00187154	0.00585657	chr11	86031469	86031611	ENSG00000073921	ENST00000630913	PICALM	PICALM-224	2	123063	118710	117417	110369	82934.3	90240.5
ENSE00003652321	102704	-0.341175	0.109706	-3.10989	0.00187154	0.00585657	chr11	86031469	86031611	ENSG00000073921	ENST00000532317	PICALM	PICALM-219	2	123063	118710	117417	110369	82934.3	90240.5
ENSE00003652321	102704	-0.341175	0.109706	-3.10989	0.00187154	0.00585657	chr11	86031469	86031611	ENSG00000073921	ENST00000528256	PICALM	PICALM-208	3	123063	118710	117417	110369	82934.3	90240.5
ENSE00003652321	102704	-0.341175	0.109706	-3.10989	0.00187154	0.00585657	chr11	86031469	86031611	ENSG00000073921	ENST00000393346	PICALM	PICALM-202	2	123063	118710	117417	110369	82934.3	90240.5
ENSE00003652321	102704	-0.341175	0.109706	-3.10989	0.00187154	0.00585657	chr11	86031469	86031611	ENSG00000073921	ENST00000532041	PICALM	PICALM-218	2	123063	118710	117417	110369	82934.3	90240.5
ENSE00003652321	102704	-0.341175	0.109706	-3.10989	0.00187154	0.00585657	chr11	86031469	86031611	ENSG00000073921	ENST00000356360	PICALM	PICALM-201	2	123063	118710	117417	110369	82934.3	90240.5
ENSE00003662432	102704	-0.341175	0.109706	-3.10989	0.00187154	0.00585657	chr11	86031469	86031611	ENSG00000073921	ENST00000525162	PICALM	PICALM-203	2	123063	118710	117417	110369	82934.3	90240.5
ENSE00003662432	102704	-0.341175	0.109706	-3.10989	0.00187154	0.00585657	chr11	86031469	86031611	ENSG00000073921	ENST00000528398	PICALM	PICALM-209	2	123063	118710	117417	110369	82934.3	90240.5
ENSE00003693567	102704	-0.341175	0.109706	-3.10989	0.00187154	0.00585657	chr11	86031469	86031611	ENSG00000073921	ENST00000528411	PICALM	PICALM-210	3	123063	118710	117417	110369	82934.3	90240.5
ENSE00003597767	19580.1	-0.075725	0.0985576	-0.768332	0.44229	0.540869	chr11	86068651	86068733	ENSG00000073921	ENST00000528411	PICALM	PICALM-210	2	21981.6	21405.5	20007.7	21561.8	18923.7	19669.3
ENSE00003660030	19580.1	-0.075725	0.0985576	-0.768332	0.44229	0.540869	chr11	86068651	86068733	ENSG00000073921	ENST00000531930	PICALM	PICALM-217	2	21981.6	21405.5	20007.7	21561.8	18923.7	19669.3
ENSE00002172284	19584.2	-0.0752864	0.0985044	-0.764295	0.444691	0.542194	chr11	86068651	86068738	ENSG00000073921	ENST00000528256	PICALM	PICALM-208	2	21982.6	21407.4	20007.7	21567.5	18924.9	19683.3
ENSE00002187592	19599.2	-0.0744288	0.0982842	-0.757281	0.448881	0.545431	chr11	86068651	86068780	ENSG00000073921	ENST00000356360	PICALM	PICALM-201	1	21995.2	21411.1	20016	21573.2	18933.6	19727.9
ENSE00002144633	19599.3	-0.0744078	0.0982829	-0.757078	0.449003	0.545431	chr11	86068651	86068797	ENSG00000073921	ENST00000534412	PICALM	PICALM-223	1	21995.2	21411.1	20016	21573.2	18933.6	19728.8
ENSE00002166253	19609.6	-0.0731665	0.0982859	-0.744426	0.456619	0.551427	chr11	86068651	86068929	ENSG00000073921	ENST00000630913	PICALM	PICALM-224	1	22002.9	21413	20021.9	21584.7	18942.3	19775.2
ENSE00002199902	19623.7	-0.0716062	0.098363	-0.727979	0.466626	0.562	chr11	86068651	86068945	ENSG00000073921	ENST00000532041	PICALM	PICALM-218	1	22009.7	21415.8	20028.9	21597.2	18954.7	19831.3
ENSE00002165284	19648.4	-0.0696612	0.0983923	-0.707994	0.478949	0.572929	chr11	86068651	86068984	ENSG00000073921	ENST00000531558	PICALM	PICALM-215	1	22038.8	21418.6	20044.2	21609.8	18993.1	19906.6
ENSE00001399245	19661.3	-0.0689716	0.0986252	-0.699331	0.484345	0.577704	chr11	86068651	86069097	ENSG00000073921	ENST00000526033	PICALM	PICALM-204	1	22050.4	21428.9	20044.2	21626.9	18996.8	19935.5
ENSE00002183285	19661.3	-0.0689716	0.0986252	-0.699331	0.484345	0.577704	chr11	86068651	86069059	ENSG00000073921	ENST00000532317	PICALM	PICALM-219	1	22050.4	21428.9	20044.2	21626.9	18996.8	19935.5
ENSE00003845746	19661.3	-0.0689716	0.0986252	-0.699331	0.484345	0.577704	chr11	86068651	86069084	ENSG00000073921	ENST00000393346	PICALM	PICALM-202	1	22050.4	21428.9	20044.2	21626.9	18996.8	19935.5
ENSE00002183778	58.0562	1.63203	0.744896	2.19095	0.0284553	0.052864	chr11	86069023	86069081	ENSG00000073921	ENST00000528256	PICALM	PICALM-208	1	53.2665	15.8573	25.9046	51.4138	65.7244	176.916
ENSE00002145326	0.724153	2.01294	4.30666	0.467402	0.640213	0.719802	chr11	86069246	86069311	ENSG00000073921	ENST00000528411	PICALM	PICALM-210	1	0	0.932784	0	0	0	4.37912
ENSE00002177652	903.852	-0.0864518	0.212802	-0.406256	0.684555	0.753609	chr11	86069458	86069539	ENSG00000073921	ENST00000525162	PICALM	PICALM-203	1	765.101	939.314	1093.88	918.593	778.773	936.256
ENSE00002172718	470.072	-0.0576997	0.256644	-0.224824	0.822116	0.865655	chr11	86069720	86069811	ENSG00000073921	ENST00000531930	PICALM	PICALM-217	1	404.825	545.679	514.559	596.4	293.9	515.86
ENSE00002182722	491.332	-0.0474084	0.261531	-0.181273	0.856153	0.893614	chr11	86069720	86069882	ENSG00000073921	ENST00000528398	PICALM	PICALM-209	1	412.573	553.141	539.286	621.536	302.58	530.749
ENSE00002194984	9392.76	0.237983	0.102889	2.31302	0.0207215	0.0418498	chr11	86244753	86245343	ENSG00000074266	ENST00000528180	EED	EED-207	1	9030.12	8090.97	9165.5	9601.81	10595.3	10800.7
ENSE00002194984	9392.76	0.237983	0.102889	2.31302	0.0207215	0.0418498	chr11	86244753	86245343	ENSG00000074266	ENST00000263360	EED	EED-201	1	9030.12	8090.97	9165.5	9601.81	10595.3	10800.7
ENSE00003892615	9392.3	0.237983	0.102855	2.31377	0.0206804	0.0418181	chr11	86244764	86245343	ENSG00000074266	ENST00000672825	EED	EED-212	1	9030.12	8090.97	9165.5	9601.81	10595.3	10800.7
ENSE00003896108	5067.7	0.17338	0.086264	2.00988	0.0444436	0.076889	chr11	86245050	86245343	ENSG00000074266	ENST00000673233	EED	EED-213	1	5069.03	4810.37	5177.38	5357.32	5354.68	6259.51
ENSE00002156264	5066.69	0.173011	0.0859422	2.01311	0.0441033	0.0764952	chr11	86245140	86245343	ENSG00000074266	ENST00000327320	EED	EED-202	1	5069.03	4810.37	5177.38	5357.32	5354.68	6255.14
ENSE00002207976	5066.14	0.172712	0.0859077	2.01043	0.0443853	0.076889	chr11	86245223	86245343	ENSG00000074266	ENST00000351625	EED	EED-203	1	5069.03	4810.37	5177.38	5357.32	5354.68	6251.63
ENSE00002182212	5065.87	0.172711	0.0859624	2.00914	0.044522	0.076889	chr11	86245234	86245343	ENSG00000074266	ENST00000534595	EED	EED-211	1	5069.03	4810.37	5177.38	5357.32	5354.68	6251.63
ENSE00002142754	5041.76	0.1676	0.0835594	2.00576	0.0448815	0.077275	chr11	86245268	86245343	ENSG00000074266	ENST00000525244	EED	EED-205	1	5046.76	4806.64	5163.25	5339.04	5342.28	6177.19
ENSE00003471447	16724	-0.0660318	0.0636233	-1.03786	0.299338	0.390432	chr11	86250296	86250448	ENSG00000074266	ENST00000525244	EED	EED-205	2	17043.3	17562.5	18968	16898	16560.1	17710
ENSE00003615608	16724	-0.0660318	0.0636233	-1.03786	0.299338	0.390432	chr11	86250296	86250448	ENSG00000074266	ENST00000327320	EED	EED-202	2	17043.3	17562.5	18968	16898	16560.1	17710
ENSE00003615608	16724	-0.0660318	0.0636233	-1.03786	0.299338	0.390432	chr11	86250296	86250448	ENSG00000074266	ENST00000672825	EED	EED-212	2	17043.3	17562.5	18968	16898	16560.1	17710
ENSE00003615608	16724	-0.0660318	0.0636233	-1.03786	0.299338	0.390432	chr11	86250296	86250448	ENSG00000074266	ENST00000263360	EED	EED-201	2	17043.3	17562.5	18968	16898	16560.1	17710
ENSE00003615608	16724	-0.0660318	0.0636233	-1.03786	0.299338	0.390432	chr11	86250296	86250448	ENSG00000074266	ENST00000351625	EED	EED-203	2	17043.3	17562.5	18968	16898	16560.1	17710
ENSE00003615608	16724	-0.0660318	0.0636233	-1.03786	0.299338	0.390432	chr11	86250296	86250448	ENSG00000074266	ENST00000528180	EED	EED-207	2	17043.3	17562.5	18968	16898	16560.1	17710
ENSE00003615608	16724	-0.0660318	0.0636233	-1.03786	0.299338	0.390432	chr11	86250296	86250448	ENSG00000074266	ENST00000673233	EED	EED-213	2	17043.3	17562.5	18968	16898	16560.1	17710
ENSE00003587936	23237	-0.118214	0.055737	-2.12093	0.0339278	0.0609664	chr11	86252148	86252240	ENSG00000074266	ENST00000351625	EED	EED-203	3	23845	24820.5	26647.6	22992.2	22651.4	23734.8
ENSE00003587936	23237	-0.118214	0.055737	-2.12093	0.0339278	0.0609664	chr11	86252148	86252240	ENSG00000074266	ENST00000263360	EED	EED-201	3	23845	24820.5	26647.6	22992.2	22651.4	23734.8
ENSE00003587936	23237	-0.118214	0.055737	-2.12093	0.0339278	0.0609664	chr11	86252148	86252240	ENSG00000074266	ENST00000528180	EED	EED-207	3	23845	24820.5	26647.6	22992.2	22651.4	23734.8
ENSE00003587936	23237	-0.118214	0.055737	-2.12093	0.0339278	0.0609664	chr11	86252148	86252240	ENSG00000074266	ENST00000673233	EED	EED-213	3	23845	24820.5	26647.6	22992.2	22651.4	23734.8
ENSE00003587936	23237	-0.118214	0.055737	-2.12093	0.0339278	0.0609664	chr11	86252148	86252240	ENSG00000074266	ENST00000327320	EED	EED-202	3	23845	24820.5	26647.6	22992.2	22651.4	23734.8
ENSE00003587936	23237	-0.118214	0.055737	-2.12093	0.0339278	0.0609664	chr11	86252148	86252240	ENSG00000074266	ENST00000672825	EED	EED-212	3	23845	24820.5	26647.6	22992.2	22651.4	23734.8
ENSE00003659483	23237	-0.118214	0.055737	-2.12093	0.0339278	0.0609664	chr11	86252148	86252240	ENSG00000074266	ENST00000525244	EED	EED-205	3	23845	24820.5	26647.6	22992.2	22651.4	23734.8
ENSE00003560025	19330.6	-0.176164	0.0828869	-2.12535	0.0335574	0.0604327	chr11	86255222	86255287	ENSG00000074266	ENST00000351625	EED	EED-203	4	20047.6	20946.6	22801.9	18826.6	17905.6	19724.4
ENSE00003560025	19330.6	-0.176164	0.0828869	-2.12535	0.0335574	0.0604327	chr11	86255222	86255287	ENSG00000074266	ENST00000672825	EED	EED-212	4	20047.6	20946.6	22801.9	18826.6	17905.6	19724.4
ENSE00003560025	19330.6	-0.176164	0.0828869	-2.12535	0.0335574	0.0604327	chr11	86255222	86255287	ENSG00000074266	ENST00000673233	EED	EED-213	4	20047.6	20946.6	22801.9	18826.6	17905.6	19724.4
ENSE00003560025	19330.6	-0.176164	0.0828869	-2.12535	0.0335574	0.0604327	chr11	86255222	86255287	ENSG00000074266	ENST00000263360	EED	EED-201	4	20047.6	20946.6	22801.9	18826.6	17905.6	19724.4
ENSE00003560025	19330.6	-0.176164	0.0828869	-2.12535	0.0335574	0.0604327	chr11	86255222	86255287	ENSG00000074266	ENST00000327320	EED	EED-202	4	20047.6	20946.6	22801.9	18826.6	17905.6	19724.4
ENSE00003560025	19330.6	-0.176164	0.0828869	-2.12535	0.0335574	0.0604327	chr11	86255222	86255287	ENSG00000074266	ENST00000528180	EED	EED-207	4	20047.6	20946.6	22801.9	18826.6	17905.6	19724.4
ENSE00003613683	19330.6	-0.176164	0.0828869	-2.12535	0.0335574	0.0604327	chr11	86255222	86255287	ENSG00000074266	ENST00000525244	EED	EED-205	4	20047.6	20946.6	22801.9	18826.6	17905.6	19724.4
ENSE00003594305	23414.1	-0.168212	0.0771583	-2.18008	0.0292512	0.0540085	chr11	86256387	86256512	ENSG00000074266	ENST00000525244	EED	EED-205	5	24178.1	25831.6	27137.4	23125.9	20904.1	24617.7
ENSE00003609161	23414.1	-0.168212	0.0771583	-2.18008	0.0292512	0.0540085	chr11	86256387	86256512	ENSG00000074266	ENST00000528180	EED	EED-207	5	24178.1	25831.6	27137.4	23125.9	20904.1	24617.7
ENSE00003609161	23414.1	-0.168212	0.0771583	-2.18008	0.0292512	0.0540085	chr11	86256387	86256512	ENSG00000074266	ENST00000672825	EED	EED-212	5	24178.1	25831.6	27137.4	23125.9	20904.1	24617.7
ENSE00003609161	23414.1	-0.168212	0.0771583	-2.18008	0.0292512	0.0540085	chr11	86256387	86256512	ENSG00000074266	ENST00000673233	EED	EED-213	5	24178.1	25831.6	27137.4	23125.9	20904.1	24617.7
ENSE00003609161	23414.1	-0.168212	0.0771583	-2.18008	0.0292512	0.0540085	chr11	86256387	86256512	ENSG00000074266	ENST00000263360	EED	EED-201	5	24178.1	25831.6	27137.4	23125.9	20904.1	24617.7
ENSE00003609161	23414.1	-0.168212	0.0771583	-2.18008	0.0292512	0.0540085	chr11	86256387	86256512	ENSG00000074266	ENST00000327320	EED	EED-202	5	24178.1	25831.6	27137.4	23125.9	20904.1	24617.7
ENSE00003609161	23414.1	-0.168212	0.0771583	-2.18008	0.0292512	0.0540085	chr11	86256387	86256512	ENSG00000074266	ENST00000351625	EED	EED-203	5	24178.1	25831.6	27137.4	23125.9	20904.1	24617.7
ENSE00003516186	17117.9	-0.167131	0.0702307	-2.37975	0.0173245	0.0363262	chr11	86257515	86257596	ENSG00000074266	ENST00000263360	EED	EED-201	6	17967.3	18777.9	19549.7	17270.5	15155.1	17702.2
ENSE00003516186	17117.9	-0.167131	0.0702307	-2.37975	0.0173245	0.0363262	chr11	86257515	86257596	ENSG00000074266	ENST00000327320	EED	EED-202	6	17967.3	18777.9	19549.7	17270.5	15155.1	17702.2
ENSE00003516186	17117.9	-0.167131	0.0702307	-2.37975	0.0173245	0.0363262	chr11	86257515	86257596	ENSG00000074266	ENST00000351625	EED	EED-203	6	17967.3	18777.9	19549.7	17270.5	15155.1	17702.2
ENSE00003516186	17117.9	-0.167131	0.0702307	-2.37975	0.0173245	0.0363262	chr11	86257515	86257596	ENSG00000074266	ENST00000672825	EED	EED-212	6	17967.3	18777.9	19549.7	17270.5	15155.1	17702.2
ENSE00003516186	17117.9	-0.167131	0.0702307	-2.37975	0.0173245	0.0363262	chr11	86257515	86257596	ENSG00000074266	ENST00000528180	EED	EED-207	6	17967.3	18777.9	19549.7	17270.5	15155.1	17702.2
ENSE00003516186	17117.9	-0.167131	0.0702307	-2.37975	0.0173245	0.0363262	chr11	86257515	86257596	ENSG00000074266	ENST00000673233	EED	EED-213	6	17967.3	18777.9	19549.7	17270.5	15155.1	17702.2
ENSE00003688766	17117.9	-0.167131	0.0702307	-2.37975	0.0173245	0.0363262	chr11	86257515	86257596	ENSG00000074266	ENST00000525244	EED	EED-205	6	17967.3	18777.9	19549.7	17270.5	15155.1	17702.2
ENSE00002195408	20959.9	-0.179399	0.0722212	-2.48402	0.0129907	0.0287016	chr11	86263945	86264263	ENSG00000074266	ENST00000533228	EED	EED-209	1	22220.8	23051.9	24293.8	21103.6	18684.3	21635.5
ENSE00002148432	29548.6	-0.208003	0.0966278	-2.15262	0.0313485	0.0572059	chr11	86263945	86266216	ENSG00000074266	ENST00000534564	EED	EED-210	1	31288.7	32226.8	34760.4	28751.7	26060.4	30263.2
ENSE00003614568	20921.5	-0.178851	0.0713084	-2.50814	0.0121369	0.0271063	chr11	86264172	86264263	ENSG00000074266	ENST00000525244	EED	EED-205	7	22195.7	23047.2	24238.4	21056.8	18684.3	21630.2
ENSE00003657568	20921.5	-0.178851	0.0713084	-2.50814	0.0121369	0.0271063	chr11	86264172	86264263	ENSG00000074266	ENST00000528180	EED	EED-207	7	22195.7	23047.2	24238.4	21056.8	18684.3	21630.2
ENSE00003657568	20921.5	-0.178851	0.0713084	-2.50814	0.0121369	0.0271063	chr11	86264172	86264263	ENSG00000074266	ENST00000327320	EED	EED-202	7	22195.7	23047.2	24238.4	21056.8	18684.3	21630.2
ENSE00003657568	20921.5	-0.178851	0.0713084	-2.50814	0.0121369	0.0271063	chr11	86264172	86264263	ENSG00000074266	ENST00000351625	EED	EED-203	7	22195.7	23047.2	24238.4	21056.8	18684.3	21630.2
ENSE00003657568	20921.5	-0.178851	0.0713084	-2.50814	0.0121369	0.0271063	chr11	86264172	86264263	ENSG00000074266	ENST00000672825	EED	EED-212	7	22195.7	23047.2	24238.4	21056.8	18684.3	21630.2
ENSE00003657568	20921.5	-0.178851	0.0713084	-2.50814	0.0121369	0.0271063	chr11	86264172	86264263	ENSG00000074266	ENST00000263360	EED	EED-201	7	22195.7	23047.2	24238.4	21056.8	18684.3	21630.2
ENSE00003657568	20921.5	-0.178851	0.0713084	-2.50814	0.0121369	0.0271063	chr11	86264172	86264263	ENSG00000074266	ENST00000673233	EED	EED-213	7	22195.7	23047.2	24238.4	21056.8	18684.3	21630.2
ENSE00003606939	21786.6	-0.259216	0.0787953	-3.28974	0.0010028	0.00374289	chr11	86266083	86266216	ENSG00000074266	ENST00000525244	EED	EED-205	8	23316.2	24539.7	26332	21285.3	18652.1	22041
ENSE00003606939	21786.6	-0.259216	0.0787953	-3.28974	0.0010028	0.00374289	chr11	86266083	86266216	ENSG00000074266	ENST00000533228	EED	EED-209	2	23316.2	24539.7	26332	21285.3	18652.1	22041
ENSE00003623983	21786.6	-0.259216	0.0787953	-3.28974	0.0010028	0.00374289	chr11	86266083	86266216	ENSG00000074266	ENST00000672825	EED	EED-212	8	23316.2	24539.7	26332	21285.3	18652.1	22041
ENSE00003623983	21786.6	-0.259216	0.0787953	-3.28974	0.0010028	0.00374289	chr11	86266083	86266216	ENSG00000074266	ENST00000351625	EED	EED-203	8	23316.2	24539.7	26332	21285.3	18652.1	22041
ENSE00003623983	21786.6	-0.259216	0.0787953	-3.28974	0.0010028	0.00374289	chr11	86266083	86266216	ENSG00000074266	ENST00000263360	EED	EED-201	8	23316.2	24539.7	26332	21285.3	18652.1	22041
ENSE00003623983	21786.6	-0.259216	0.0787953	-3.28974	0.0010028	0.00374289	chr11	86266083	86266216	ENSG00000074266	ENST00000327320	EED	EED-202	8	23316.2	24539.7	26332	21285.3	18652.1	22041
ENSE00003623983	21786.6	-0.259216	0.0787953	-3.28974	0.0010028	0.00374289	chr11	86266083	86266216	ENSG00000074266	ENST00000673233	EED	EED-213	8	23316.2	24539.7	26332	21285.3	18652.1	22041
ENSE00002149007	17094.4	-0.257067	0.0759318	-3.3855	0.000710476	0.00278439	chr11	86267895	86268561	ENSG00000074266	ENST00000524673	EED	EED-204	1	18644.2	18413.2	21160.5	15418.4	16065.3	17224
ENSE00003472993	17082.4	-0.256923	0.0762065	-3.37141	0.000747856	0.0028896	chr11	86268456	86268561	ENSG00000074266	ENST00000525244	EED	EED-205	9	18637.5	18396.4	21158.1	15405.9	16062.8	17222.2
ENSE00003472993	17082.4	-0.256923	0.0762065	-3.37141	0.000747856	0.0028896	chr11	86268456	86268561	ENSG00000074266	ENST00000534564	EED	EED-210	2	18637.5	18396.4	21158.1	15405.9	16062.8	17222.2
ENSE00003652990	17082.4	-0.256923	0.0762065	-3.37141	0.000747856	0.0028896	chr11	86268456	86268561	ENSG00000074266	ENST00000263360	EED	EED-201	9	18637.5	18396.4	21158.1	15405.9	16062.8	17222.2
ENSE00003652990	17082.4	-0.256923	0.0762065	-3.37141	0.000747856	0.0028896	chr11	86268456	86268561	ENSG00000074266	ENST00000327320	EED	EED-202	9	18637.5	18396.4	21158.1	15405.9	16062.8	17222.2
ENSE00003652990	17082.4	-0.256923	0.0762065	-3.37141	0.000747856	0.0028896	chr11	86268456	86268561	ENSG00000074266	ENST00000672825	EED	EED-212	9	18637.5	18396.4	21158.1	15405.9	16062.8	17222.2
ENSE00003652990	17082.4	-0.256923	0.0762065	-3.37141	0.000747856	0.0028896	chr11	86268456	86268561	ENSG00000074266	ENST00000673233	EED	EED-213	9	18637.5	18396.4	21158.1	15405.9	16062.8	17222.2
ENSE00003652990	17082.4	-0.256923	0.0762065	-3.37141	0.000747856	0.0028896	chr11	86268456	86268561	ENSG00000074266	ENST00000351625	EED	EED-203	9	18637.5	18396.4	21158.1	15405.9	16062.8	17222.2
ENSE00002152375	14751.2	-0.249083	0.0860139	-2.89585	0.00378134	0.0106577	chr11	86268456	86268530	ENSG00000074266	ENST00000533228	EED	EED-209	3	16072	15672.6	18530	13201.9	14314.3	14780.4
ENSE00003575480	2658.65	-0.239053	0.123168	-1.94088	0.0522732	0.087352	chr11	86270083	86270157	ENSG00000074266	ENST00000351625	EED	EED-203	10	3074.93	3301.12	3462.97	2319.33	2787.71	3224.78
ENSE00003684452	2658.65	-0.239053	0.123168	-1.94088	0.0522732	0.087352	chr11	86270083	86270157	ENSG00000074266	ENST00000524673	EED	EED-204	2	3074.93	3301.12	3462.97	2319.33	2787.71	3224.78
ENSE00002148329	30220.6	-0.146208	0.0808095	-1.80929	0.0704057	0.112294	chr11	86276132	86277138	ENSG00000074266	ENST00000527888	EED	EED-206	1	31918.3	32018.8	35376.2	29081.9	30068.3	30587.3
ENSE00003489378	30173.2	-0.147438	0.0785984	-1.87584	0.0606766	0.0987145	chr11	86276980	86277138	ENSG00000074266	ENST00000524673	EED	EED-204	3	31918.3	31998.2	35352.7	29063.6	30005.1	30552.2
ENSE00003489378	30173.2	-0.147438	0.0785984	-1.87584	0.0606766	0.0987145	chr11	86276980	86277138	ENSG00000074266	ENST00000534564	EED	EED-210	3	31918.3	31998.2	35352.7	29063.6	30005.1	30552.2
ENSE00003494253	30173.2	-0.147438	0.0785984	-1.87584	0.0606766	0.0987145	chr11	86276980	86277138	ENSG00000074266	ENST00000673233	EED	EED-213	10	31918.3	31998.2	35352.7	29063.6	30005.1	30552.2
ENSE00003494253	30173.2	-0.147438	0.0785984	-1.87584	0.0606766	0.0987145	chr11	86276980	86277138	ENSG00000074266	ENST00000528180	EED	EED-207	8	31918.3	31998.2	35352.7	29063.6	30005.1	30552.2
ENSE00003494253	30173.2	-0.147438	0.0785984	-1.87584	0.0606766	0.0987145	chr11	86276980	86277138	ENSG00000074266	ENST00000327320	EED	EED-202	10	31918.3	31998.2	35352.7	29063.6	30005.1	30552.2
ENSE00003494253	30173.2	-0.147438	0.0785984	-1.87584	0.0606766	0.0987145	chr11	86276980	86277138	ENSG00000074266	ENST00000351625	EED	EED-203	11	31918.3	31998.2	35352.7	29063.6	30005.1	30552.2
ENSE00003494253	30173.2	-0.147438	0.0785984	-1.87584	0.0606766	0.0987145	chr11	86276980	86277138	ENSG00000074266	ENST00000672825	EED	EED-212	10	31918.3	31998.2	35352.7	29063.6	30005.1	30552.2
ENSE00003494253	30173.2	-0.147438	0.0785984	-1.87584	0.0606766	0.0987145	chr11	86276980	86277138	ENSG00000074266	ENST00000534595	EED	EED-211	2	31918.3	31998.2	35352.7	29063.6	30005.1	30552.2
ENSE00003494253	30173.2	-0.147438	0.0785984	-1.87584	0.0606766	0.0987145	chr11	86276980	86277138	ENSG00000074266	ENST00000263360	EED	EED-201	10	31918.3	31998.2	35352.7	29063.6	30005.1	30552.2
ENSE00002197239	30306.1	-0.146202	0.0864113	-1.69194	0.0906583	0.140644	chr11	86276980	86277535	ENSG00000074266	ENST00000525244	EED	EED-205	10	31918.3	32033.7	35410.4	29099.1	30068.3	30615.3
ENSE00002179258	28806.1	-0.187336	0.047357	-3.95582	7.62717e-05	0.000368458	chr11	86277098	86277991	ENSG00000074266	ENST00000528250	EED	EED-208	1	30953.6	31656.8	33619.4	27460.7	28803.4	28242.7
ENSE00002191703	21338.2	-0.199926	0.0576547	-3.46765	0.000525037	0.00212836	chr11	86277918	86278361	ENSG00000074266	ENST00000534595	EED	EED-211	3	23016	23649.8	25088.6	20271.9	21148.4	21044.3
ENSE00003500372	20359.9	-0.19623	0.0639282	-3.06954	0.00214391	0.00653497	chr11	86277918	86277991	ENSG00000074266	ENST00000524673	EED	EED-204	4	22004.9	22551	23881.7	19255	20461.4	20015.2
ENSE00003500372	20359.9	-0.19623	0.0639282	-3.06954	0.00214391	0.00653497	chr11	86277918	86277991	ENSG00000074266	ENST00000534564	EED	EED-210	4	22004.9	22551	23881.7	19255	20461.4	20015.2
ENSE00003608084	20359.9	-0.19623	0.0639282	-3.06954	0.00214391	0.00653497	chr11	86277918	86277991	ENSG00000074266	ENST00000672825	EED	EED-212	11	22004.9	22551	23881.7	19255	20461.4	20015.2
ENSE00003608084	20359.9	-0.19623	0.0639282	-3.06954	0.00214391	0.00653497	chr11	86277918	86277991	ENSG00000074266	ENST00000528180	EED	EED-207	9	22004.9	22551	23881.7	19255	20461.4	20015.2
ENSE00003608084	20359.9	-0.19623	0.0639282	-3.06954	0.00214391	0.00653497	chr11	86277918	86277991	ENSG00000074266	ENST00000263360	EED	EED-201	11	22004.9	22551	23881.7	19255	20461.4	20015.2
ENSE00003608084	20359.9	-0.19623	0.0639282	-3.06954	0.00214391	0.00653497	chr11	86277918	86277991	ENSG00000074266	ENST00000673233	EED	EED-213	11	22004.9	22551	23881.7	19255	20461.4	20015.2
ENSE00003608084	20359.9	-0.19623	0.0639282	-3.06954	0.00214391	0.00653497	chr11	86277918	86277991	ENSG00000074266	ENST00000351625	EED	EED-203	12	22004.9	22551	23881.7	19255	20461.4	20015.2
ENSE00003608084	20359.9	-0.19623	0.0639282	-3.06954	0.00214391	0.00653497	chr11	86277918	86277991	ENSG00000074266	ENST00000527888	EED	EED-206	2	22004.9	22551	23881.7	19255	20461.4	20015.2
ENSE00001345119	46035.8	-0.202449	0.118661	-1.70611	0.0879868	0.136887	chr11	86277918	86278735	ENSG00000074266	ENST00000327320	EED	EED-202	11	47873	49200.6	53070.2	42841.4	43479.8	44163.4
ENSE00002193147	32022.9	-0.22898	0.0862444	-2.65502	0.00793043	0.0190745	chr11	86278399	86278554	ENSG00000074266	ENST00000534564	EED	EED-210	5	33886.2	34504.6	38675.5	30081.6	29278.4	31986.8
ENSE00002194245	33917.8	-0.237248	0.0981689	-2.41673	0.0156605	0.0330477	chr11	86278399	86278578	ENSG00000074266	ENST00000524673	EED	EED-204	5	35657.6	36317	40893.9	31614.9	30821	33312.8
ENSE00002182192	37267.1	-0.231186	0.125846	-1.83705	0.0662021	0.106415	chr11	86278399	86278707	ENSG00000074266	ENST00000528180	EED	EED-207	10	38748	39860.7	43668	34878	33680.7	35611
ENSE00003558631	37315.1	-0.231417	0.126687	-1.82668	0.0677472	0.10858	chr11	86278399	86278739	ENSG00000074266	ENST00000528250	EED	EED-208	2	38762.5	39907.3	43702.2	34894	33681.9	35658.3
ENSE00003630292	37315.1	-0.231417	0.126687	-1.82668	0.0677472	0.10858	chr11	86278399	86278739	ENSG00000074266	ENST00000527888	EED	EED-206	3	38762.5	39907.3	43702.2	34894	33681.9	35658.3
ENSE00003896096	37320	-0.23131	0.126721	-1.82534	0.067949	0.108798	chr11	86278399	86278743	ENSG00000074266	ENST00000672825	EED	EED-212	12	38762.5	39911	43717.5	34906.5	33681.9	35669.7
ENSE00001514890	37364.7	-0.230634	0.127594	-1.80756	0.070675	0.112553	chr11	86278399	86278810	ENSG00000074266	ENST00000263360	EED	EED-201	12	38787.7	39928.8	43737.5	34951.1	33730.3	35679.3
ENSE00001514890	37364.7	-0.230634	0.127594	-1.80756	0.070675	0.112553	chr11	86278399	86278810	ENSG00000074266	ENST00000673233	EED	EED-213	12	38787.7	39928.8	43737.5	34951.1	33730.3	35679.3
ENSE00003386196	37364.9	-0.230634	0.127607	-1.80737	0.0707048	0.112553	chr11	86278399	86278813	ENSG00000074266	ENST00000351625	EED	EED-203	13	38787.7	39928.8	43737.5	34951.1	33730.3	35679.3
ENSE00001647175	9755.07	0.341451	0.211956	1.61095	0.107191	0.162207	chr11	86302211	86302478	ENSG00000149196	ENST00000533986	HIKESHI	HIKESHI-207	1	9187.99	8994.84	9830.78	9742.34	12114.4	13635.7
ENSE00002165443	9755.07	0.341451	0.211956	1.61095	0.107191	0.162207	chr11	86302240	86302478	ENSG00000149196	ENST00000278483	HIKESHI	HIKESHI-201	1	9187.99	8994.84	9830.78	9742.34	12114.4	13635.7
ENSE00002190457	9755.07	0.341451	0.211956	1.61095	0.107191	0.162207	chr11	86302243	86302478	ENSG00000149196	ENST00000531485	HIKESHI	HIKESHI-205	1	9187.99	8994.84	9830.78	9742.34	12114.4	13635.7
ENSE00002199027	9755	0.341451	0.211973	1.61082	0.107218	0.162207	chr11	86302251	86302478	ENSG00000149196	ENST00000528004	HIKESHI	HIKESHI-202	1	9187.99	8994.84	9830.78	9742.34	12114.4	13635.7
ENSE00002162207	9700.14	0.338503	0.213886	1.58263	0.113505	0.169999	chr11	86302284	86302478	ENSG00000149196	ENST00000532270	HIKESHI	HIKESHI-206	1	9171.52	8943.54	9802.52	9656.65	12077.2	13564.8
ENSE00002180938	351.308	0.0260055	0.36758	0.0707479	0.943598	0.958151	chr11	86303356	86303460	ENSG00000149196	ENST00000530208	HIKESHI	HIKESHI-204	1	399.983	336.735	350.889	478.72	251.737	376.604
ENSE00002197089	378.299	-0.0222645	0.370338	-0.0601195	0.95206	0.964364	chr11	86303357	86303530	ENSG00000149196	ENST00000532270	HIKESHI	HIKESHI-206	2	400.951	390.837	399.166	497	259.178	416.016
ENSE00003580378	54735.6	-0.0760192	0.0806238	-0.942888	0.345738	0.44081	chr11	86306245	86306482	ENSG00000149196	ENST00000532270	HIKESHI	HIKESHI-206	3	57347.7	55489.5	57150.2	52283.3	54984.1	53994.5
ENSE00003580378	54735.6	-0.0760192	0.0806238	-0.942888	0.345738	0.44081	chr11	86306245	86306482	ENSG00000149196	ENST00000530208	HIKESHI	HIKESHI-204	2	57347.7	55489.5	57150.2	52283.3	54984.1	53994.5
ENSE00003690964	54735.6	-0.0760192	0.0806238	-0.942888	0.345738	0.44081	chr11	86306245	86306482	ENSG00000149196	ENST00000278483	HIKESHI	HIKESHI-201	2	57347.7	55489.5	57150.2	52283.3	54984.1	53994.5
ENSE00003690964	54735.6	-0.0760192	0.0806238	-0.942888	0.345738	0.44081	chr11	86306245	86306482	ENSG00000149196	ENST00000533986	HIKESHI	HIKESHI-207	2	57347.7	55489.5	57150.2	52283.3	54984.1	53994.5
ENSE00003690964	54735.6	-0.0760192	0.0806238	-0.942888	0.345738	0.44081	chr11	86306245	86306482	ENSG00000149196	ENST00000528004	HIKESHI	HIKESHI-202	2	57347.7	55489.5	57150.2	52283.3	54984.1	53994.5
ENSE00003743697	40715	-0.086873	0.0817758	-1.06233	0.288085	0.380569	chr11	86306333	86306414	ENSG00000149196	ENST00000618164	HIKESHI	HIKESHI-208	1	43478.1	42022.9	44542.9	39870.8	41463.4	41108.6
ENSE00003742828	43604.7	-0.101173	0.0865008	-1.16961	0.242156	0.327787	chr11	86306416	86306482	ENSG00000149196	ENST00000618164	HIKESHI	HIKESHI-208	2	47528.2	45145.8	46103.1	42830	44496.7	42053.6
ENSE00002142577	558.024	0.112278	0.234404	0.478993	0.631944	0.712452	chr11	86326513	86326676	ENSG00000149196	ENST00000528004	HIKESHI	HIKESHI-202	3	531.697	513.031	585.208	428.448	649.804	682.267
ENSE00003543203	65305.2	-0.0903461	0.0478136	-1.88955	0.0588186	0.0961425	chr11	86337379	86337530	ENSG00000149196	ENST00000530208	HIKESHI	HIKESHI-204	3	70808.6	67213.6	67157.6	63515.5	67518.9	61701.8
ENSE00003543203	65305.2	-0.0903461	0.0478136	-1.88955	0.0588186	0.0961425	chr11	86337379	86337530	ENSG00000149196	ENST00000531485	HIKESHI	HIKESHI-205	2	70808.6	67213.6	67157.6	63515.5	67518.9	61701.8
ENSE00003543203	65305.2	-0.0903461	0.0478136	-1.88955	0.0588186	0.0961425	chr11	86337379	86337530	ENSG00000149196	ENST00000528004	HIKESHI	HIKESHI-202	4	70808.6	67213.6	67157.6	63515.5	67518.9	61701.8
ENSE00003579101	65305.2	-0.0903461	0.0478136	-1.88955	0.0588186	0.0961425	chr11	86337379	86337530	ENSG00000149196	ENST00000533986	HIKESHI	HIKESHI-207	3	70808.6	67213.6	67157.6	63515.5	67518.9	61701.8
ENSE00003579101	65305.2	-0.0903461	0.0478136	-1.88955	0.0588186	0.0961425	chr11	86337379	86337530	ENSG00000149196	ENST00000618164	HIKESHI	HIKESHI-208	3	70808.6	67213.6	67157.6	63515.5	67518.9	61701.8
ENSE00003579101	65305.2	-0.0903461	0.0478136	-1.88955	0.0588186	0.0961425	chr11	86337379	86337530	ENSG00000149196	ENST00000278483	HIKESHI	HIKESHI-201	3	70808.6	67213.6	67157.6	63515.5	67518.9	61701.8
ENSE00002148180	59574.2	-0.0945844	0.0548153	-1.72551	0.0844353	0.131735	chr11	86337379	86337495	ENSG00000149196	ENST00000532270	HIKESHI	HIKESHI-206	4	64864.1	61408	61771.8	57887.4	61697.9	56533.6
ENSE00002175816	42636.2	-0.141275	0.0717142	-1.96998	0.0488407	0.082464	chr11	86343508	86344721	ENSG00000149196	ENST00000529405	HIKESHI	HIKESHI-203	1	47767.5	44639.3	43556.2	42043.9	41666.8	39574.1
ENSE00003552301	42577	-0.141622	0.0710948	-1.99201	0.0463699	0.0792574	chr11	86344603	86344721	ENSG00000149196	ENST00000278483	HIKESHI	HIKESHI-201	4	47714.2	44584.3	43504.4	41957.1	41633.3	39519.8
ENSE00003552301	42577	-0.141622	0.0710948	-1.99201	0.0463699	0.0792574	chr11	86344603	86344721	ENSG00000149196	ENST00000618164	HIKESHI	HIKESHI-208	4	47714.2	44584.3	43504.4	41957.1	41633.3	39519.8
ENSE00003569788	42577	-0.141622	0.0710948	-1.99201	0.0463699	0.0792574	chr11	86344603	86344721	ENSG00000149196	ENST00000531485	HIKESHI	HIKESHI-205	3	47714.2	44584.3	43504.4	41957.1	41633.3	39519.8
ENSE00003569788	42577	-0.141622	0.0710948	-1.99201	0.0463699	0.0792574	chr11	86344603	86344721	ENSG00000149196	ENST00000530208	HIKESHI	HIKESHI-204	4	47714.2	44584.3	43504.4	41957.1	41633.3	39519.8
ENSE00002140467	55965.6	-0.114172	0.0928926	-1.22908	0.219042	0.301457	chr11	86344603	86345229	ENSG00000149196	ENST00000528004	HIKESHI	HIKESHI-202	5	60214.4	57287.9	57217.3	55157.9	53783.7	52485.5
ENSE00002146303	57877.5	-0.114728	0.101384	-1.13162	0.257795	0.345545	chr11	86344603	86345638	ENSG00000149196	ENST00000533986	HIKESHI	HIKESHI-207	4	61682.6	59291.5	58895.2	56897.9	55144.1	54078.6
ENSE00002154440	8207.28	-0.0172156	0.0727574	-0.236617	0.812954	0.857771	chr11	86345094	86345198	ENSG00000149196	ENST00000530208	HIKESHI	HIKESHI-204	5	8065.52	8026.61	8482.57	7963.43	7893.13	8421.05
ENSE00003587354	14904.8	-0.278327	0.100196	-2.77782	0.00547251	0.0142078	chr11	86345584	86345943	ENSG00000149196	ENST00000278483	HIKESHI	HIKESHI-201	5	18644.2	16610.1	16146.8	14457.6	14005.5	13921.2
ENSE00003611909	14904.8	-0.278327	0.100196	-2.77782	0.00547251	0.0142078	chr11	86345584	86345927	ENSG00000149196	ENST00000529405	HIKESHI	HIKESHI-203	2	18644.2	16610.1	16146.8	14457.6	14005.5	13921.2
ENSE00002180165	14897.6	-0.278019	0.100245	-2.7734	0.00554744	0.0143571	chr11	86345584	86345791	ENSG00000149196	ENST00000531485	HIKESHI	HIKESHI-205	4	18639.4	16607.3	16124.4	14457.6	13996.8	13914.2
ENSE00002159359	14730.9	-0.274145	0.100634	-2.72417	0.00644631	0.0161501	chr11	86345584	86345663	ENSG00000149196	ENST00000530208	HIKESHI	HIKESHI-204	6	18428.3	16359.2	15967.8	14310.2	13916.2	13746.9
ENSE00003739833	14727.3	-0.274177	0.100728	-2.72196	0.00648962	0.0162339	chr11	86345584	86345662	ENSG00000149196	ENST00000618164	HIKESHI	HIKESHI-208	5	18428.3	16359.2	15945.4	14290.7	13916.2	13746.9
ENSE00003652256	277.227	0.481695	0.253749	1.89831	0.0576555	0.0946171	chr11	86374736	86375242	ENSG00000149201	ENST00000354755	CCDC81	CCDC81-201	1	215.003	214.54	163.67	236.503	267.858	324.055
ENSE00002151315	277.227	0.481695	0.253749	1.89831	0.0576555	0.0946171	chr11	86374887	86375242	ENSG00000149201	ENST00000445632	CCDC81	CCDC81-202	1	215.003	214.54	163.67	236.503	267.858	324.055
ENSE00002151315	277.227	0.481695	0.253749	1.89831	0.0576555	0.0946171	chr11	86374887	86375242	ENSG00000149201	ENST00000531271	CCDC81	CCDC81-207	1	215.003	214.54	163.67	236.503	267.858	324.055
ENSE00003594792	291.453	0.297395	0.258387	1.15097	0.249746	0.336676	chr11	86386051	86386112	ENSG00000149201	ENST00000445632	CCDC81	CCDC81-202	2	265.364	276.104	227.254	331.333	275.299	338.068
ENSE00003594792	291.453	0.297395	0.258387	1.15097	0.249746	0.336676	chr11	86386051	86386112	ENSG00000149201	ENST00000531271	CCDC81	CCDC81-207	2	265.364	276.104	227.254	331.333	275.299	338.068
ENSE00003594792	291.453	0.297395	0.258387	1.15097	0.249746	0.336676	chr11	86386051	86386112	ENSG00000149201	ENST00000354755	CCDC81	CCDC81-201	2	265.364	276.104	227.254	331.333	275.299	338.068
ENSE00001705058	888.884	0.144169	0.181941	0.792394	0.428131	0.52866	chr11	86387516	86387659	ENSG00000149201	ENST00000354755	CCDC81	CCDC81-201	3	827.083	735.967	814.816	784.917	713.048	1125.43
ENSE00003679650	925.421	0.079276	0.190166	0.416879	0.676767	0.747122	chr11	86387516	86387672	ENSG00000149201	ENST00000445632	CCDC81	CCDC81-202	3	879.381	735.967	910.192	811.195	713.048	1139.45
ENSE00003639378	1523.34	0.0510121	0.226982	0.22474	0.822181	0.865655	chr11	86392541	86392797	ENSG00000149201	ENST00000445632	CCDC81	CCDC81-202	4	1455.63	1053.11	1538.97	1321.91	1202.88	1665.82
ENSE00002143905	504.89	0.295971	0.230717	1.28283	0.199551	0.279067	chr11	86395111	86395413	ENSG00000149201	ENST00000530845	CCDC81	CCDC81-206	1	504.579	393.635	465.105	646.671	455.111	571.037
ENSE00002179651	504.89	0.295971	0.230717	1.28283	0.199551	0.279067	chr11	86395152	86395413	ENSG00000149201	ENST00000532466	CCDC81	CCDC81-210	1	504.579	393.635	465.105	646.671	455.111	571.037
ENSE00002179651	504.89	0.295971	0.230717	1.28283	0.199551	0.279067	chr11	86395152	86395413	ENSG00000149201	ENST00000532215	CCDC81	CCDC81-209	1	504.579	393.635	465.105	646.671	455.111	571.037
ENSE00002150150	504.89	0.295971	0.230717	1.28283	0.199551	0.279067	chr11	86395174	86395413	ENSG00000149201	ENST00000528728	CCDC81	CCDC81-204	1	504.579	393.635	465.105	646.671	455.111	571.037
ENSE00002150150	504.89	0.295971	0.230717	1.28283	0.199551	0.279067	chr11	86395174	86395413	ENSG00000149201	ENST00000529603	CCDC81	CCDC81-205	1	504.579	393.635	465.105	646.671	455.111	571.037
ENSE00003646516	503.213	0.299127	0.231443	1.29245	0.196203	0.275554	chr11	86395334	86395413	ENSG00000149201	ENST00000445632	CCDC81	CCDC81-202	5	504.579	388.971	463.927	646.671	455.111	567.534
ENSE00003646516	503.213	0.299127	0.231443	1.29245	0.196203	0.275554	chr11	86395334	86395413	ENSG00000149201	ENST00000531271	CCDC81	CCDC81-207	3	504.579	388.971	463.927	646.671	455.111	567.534
ENSE00003646516	503.213	0.299127	0.231443	1.29245	0.196203	0.275554	chr11	86395334	86395413	ENSG00000149201	ENST00000354755	CCDC81	CCDC81-201	4	504.579	388.971	463.927	646.671	455.111	567.534
ENSE00003478676	220.86	-0.454171	0.299717	-1.51533	0.129688	0.190256	chr11	86397621	86397742	ENSG00000149201	ENST00000354755	CCDC81	CCDC81-201	5	235.341	217.339	231.964	189.66	138.889	170.786
ENSE00003478676	220.86	-0.454171	0.299717	-1.51533	0.129688	0.190256	chr11	86397621	86397742	ENSG00000149201	ENST00000445632	CCDC81	CCDC81-202	6	235.341	217.339	231.964	189.66	138.889	170.786
ENSE00003547532	220.86	-0.454171	0.299717	-1.51533	0.129688	0.190256	chr11	86397621	86397742	ENSG00000149201	ENST00000528728	CCDC81	CCDC81-204	2	235.341	217.339	231.964	189.66	138.889	170.786
ENSE00003646793	220.86	-0.454171	0.299717	-1.51533	0.129688	0.190256	chr11	86397621	86397742	ENSG00000149201	ENST00000529603	CCDC81	CCDC81-205	2	235.341	217.339	231.964	189.66	138.889	170.786
ENSE00002188972	151.344	-0.379701	0.323159	-1.17497	0.240008	0.326221	chr11	86397621	86397665	ENSG00000149201	ENST00000531271	CCDC81	CCDC81-207	4	159.799	163.237	155.427	148.529	95.4865	123.491
ENSE00003542942	535.158	0.0963887	0.232562	0.414465	0.678534	0.74778	chr11	86400678	86400801	ENSG00000149201	ENST00000529603	CCDC81	CCDC81-205	3	540.413	412.291	574.61	666.094	493.553	472.945
ENSE00003542942	535.158	0.0963887	0.232562	0.414465	0.678534	0.74778	chr11	86400678	86400801	ENSG00000149201	ENST00000532466	CCDC81	CCDC81-210	2	540.413	412.291	574.61	666.094	493.553	472.945
ENSE00003542942	535.158	0.0963887	0.232562	0.414465	0.678534	0.74778	chr11	86400678	86400801	ENSG00000149201	ENST00000530845	CCDC81	CCDC81-206	2	540.413	412.291	574.61	666.094	493.553	472.945
ENSE00003542942	535.158	0.0963887	0.232562	0.414465	0.678534	0.74778	chr11	86400678	86400801	ENSG00000149201	ENST00000532215	CCDC81	CCDC81-209	2	540.413	412.291	574.61	666.094	493.553	472.945
ENSE00003581927	535.158	0.0963887	0.232562	0.414465	0.678534	0.74778	chr11	86400678	86400801	ENSG00000149201	ENST00000528728	CCDC81	CCDC81-204	3	540.413	412.291	574.61	666.094	493.553	472.945
ENSE00003581927	535.158	0.0963887	0.232562	0.414465	0.678534	0.74778	chr11	86400678	86400801	ENSG00000149201	ENST00000445632	CCDC81	CCDC81-202	7	540.413	412.291	574.61	666.094	493.553	472.945
ENSE00003581927	535.158	0.0963887	0.232562	0.414465	0.678534	0.74778	chr11	86400678	86400801	ENSG00000149201	ENST00000354755	CCDC81	CCDC81-201	6	540.413	412.291	574.61	666.094	493.553	472.945
ENSE00002165907	239.244	0.186185	0.284194	0.655132	0.512383	0.605009	chr11	86407614	86407677	ENSG00000149201	ENST00000529603	CCDC81	CCDC81-205	4	195.633	219.204	283.773	247.929	259.178	286.394
ENSE00003469593	270.336	0.163865	0.251354	0.651931	0.514446	0.605673	chr11	86407614	86407701	ENSG00000149201	ENST00000528728	CCDC81	CCDC81-204	4	230.499	235.994	320.275	269.637	303.821	306.538
ENSE00003469593	270.336	0.163865	0.251354	0.651931	0.514446	0.605673	chr11	86407614	86407701	ENSG00000149201	ENST00000445632	CCDC81	CCDC81-202	8	230.499	235.994	320.275	269.637	303.821	306.538
ENSE00003469593	270.336	0.163865	0.251354	0.651931	0.514446	0.605673	chr11	86407614	86407701	ENSG00000149201	ENST00000354755	CCDC81	CCDC81-201	7	230.499	235.994	320.275	269.637	303.821	306.538
ENSE00003583560	270.336	0.163865	0.251354	0.651931	0.514446	0.605673	chr11	86407614	86407701	ENSG00000149201	ENST00000532466	CCDC81	CCDC81-210	3	230.499	235.994	320.275	269.637	303.821	306.538
ENSE00003583560	270.336	0.163865	0.251354	0.651931	0.514446	0.605673	chr11	86407614	86407701	ENSG00000149201	ENST00000532215	CCDC81	CCDC81-209	3	230.499	235.994	320.275	269.637	303.821	306.538
ENSE00001426057	254.209	0.2367	0.263664	0.89773	0.369329	0.467988	chr11	86408127	86408270	ENSG00000149201	ENST00000445632	CCDC81	CCDC81-202	9	179.169	271.44	228.431	237.646	274.059	288.146
ENSE00001426057	254.209	0.2367	0.263664	0.89773	0.369329	0.467988	chr11	86408127	86408270	ENSG00000149201	ENST00000354755	CCDC81	CCDC81-201	8	179.169	271.44	228.431	237.646	274.059	288.146
ENSE00002185192	232.286	0.0831504	0.253162	0.328447	0.742574	0.798029	chr11	86408127	86408234	ENSG00000149201	ENST00000532466	CCDC81	CCDC81-210	4	172.39	266.776	226.076	214.795	255.457	234.721
ENSE00003576185	562.747	0.351505	0.212982	1.6504	0.0988608	0.152364	chr11	86409261	86409365	ENSG00000149201	ENST00000532215	CCDC81	CCDC81-209	4	558.814	360.988	513.381	530.133	653.524	643.731
ENSE00003576185	562.747	0.351505	0.212982	1.6504	0.0988608	0.152364	chr11	86409261	86409365	ENSG00000149201	ENST00000530845	CCDC81	CCDC81-206	3	558.814	360.988	513.381	530.133	653.524	643.731
ENSE00003672146	562.747	0.351505	0.212982	1.6504	0.0988608	0.152364	chr11	86409261	86409365	ENSG00000149201	ENST00000354755	CCDC81	CCDC81-201	9	558.814	360.988	513.381	530.133	653.524	643.731
ENSE00003672146	562.747	0.351505	0.212982	1.6504	0.0988608	0.152364	chr11	86409261	86409365	ENSG00000149201	ENST00000528728	CCDC81	CCDC81-204	5	558.814	360.988	513.381	530.133	653.524	643.731
ENSE00003672146	562.747	0.351505	0.212982	1.6504	0.0988608	0.152364	chr11	86409261	86409365	ENSG00000149201	ENST00000445632	CCDC81	CCDC81-202	10	558.814	360.988	513.381	530.133	653.524	643.731
ENSE00000989299	718.218	0.231641	0.155261	1.49195	0.135712	0.198562	chr11	86412387	86412559	ENSG00000149201	ENST00000354755	CCDC81	CCDC81-201	10	645.977	587.654	599.337	638.674	776.293	737.444
ENSE00000989299	718.218	0.231641	0.155261	1.49195	0.135712	0.198562	chr11	86412387	86412559	ENSG00000149201	ENST00000528728	CCDC81	CCDC81-204	6	645.977	587.654	599.337	638.674	776.293	737.444
ENSE00000989299	718.218	0.231641	0.155261	1.49195	0.135712	0.198562	chr11	86412387	86412559	ENSG00000149201	ENST00000445632	CCDC81	CCDC81-202	11	645.977	587.654	599.337	638.674	776.293	737.444
ENSE00002158870	457.746	0.169253	0.196493	0.861366	0.389036	0.491069	chr11	86412387	86412438	ENSG00000149201	ENST00000530845	CCDC81	CCDC81-206	4	455.186	413.224	369.729	385.032	548.117	460.683
ENSE00002195087	1096.22	0.0753544	0.201427	0.374103	0.708327	0.770593	chr11	86414326	86415313	ENSG00000149201	ENST00000531587	CCDC81	CCDC81-208	1	925.869	987.819	966.711	1095.69	864.339	1073.76
ENSE00000989303	456.978	0.101298	0.158308	0.639882	0.522249	0.609661	chr11	86414789	86414867	ENSG00000149201	ENST00000445632	CCDC81	CCDC81-202	12	385.456	444.005	454.507	490.145	390.626	493.965
ENSE00000989303	456.978	0.101298	0.158308	0.639882	0.522249	0.609661	chr11	86414789	86414867	ENSG00000149201	ENST00000528728	CCDC81	CCDC81-204	7	385.456	444.005	454.507	490.145	390.626	493.965
ENSE00000989303	456.978	0.101298	0.158308	0.639882	0.522249	0.609661	chr11	86414789	86414867	ENSG00000149201	ENST00000354755	CCDC81	CCDC81-201	11	385.456	444.005	454.507	490.145	390.626	493.965
ENSE00000989307	928.603	0.130369	0.182711	0.713528	0.475519	0.570499	chr11	86415093	86415313	ENSG00000149201	ENST00000445632	CCDC81	CCDC81-202	13	777.691	837.64	798.331	943.729	768.852	928.373
ENSE00000989307	928.603	0.130369	0.182711	0.713528	0.475519	0.570499	chr11	86415093	86415313	ENSG00000149201	ENST00000528728	CCDC81	CCDC81-204	8	777.691	837.64	798.331	943.729	768.852	928.373
ENSE00000989307	928.603	0.130369	0.182711	0.713528	0.475519	0.570499	chr11	86415093	86415313	ENSG00000149201	ENST00000354755	CCDC81	CCDC81-201	12	777.691	837.64	798.331	943.729	768.852	928.373
ENSE00002146258	636.25	0.304323	0.195799	1.55426	0.120122	0.17861	chr11	86419076	86420053	ENSG00000149201	ENST00000525247	CCDC81	CCDC81-203	1	520.075	398.299	632.307	543.844	711.808	656.868
ENSE00003633905	632.839	0.297058	0.191957	1.54752	0.121738	0.179874	chr11	86419928	86420053	ENSG00000149201	ENST00000531587	CCDC81	CCDC81-208	2	520.075	397.366	631.129	543.844	699.407	656.868
ENSE00003662923	632.839	0.297058	0.191957	1.54752	0.121738	0.179874	chr11	86419928	86420053	ENSG00000149201	ENST00000528728	CCDC81	CCDC81-204	9	520.075	397.366	631.129	543.844	699.407	656.868
ENSE00003662923	632.839	0.297058	0.191957	1.54752	0.121738	0.179874	chr11	86419928	86420053	ENSG00000149201	ENST00000445632	CCDC81	CCDC81-202	14	520.075	397.366	631.129	543.844	699.407	656.868
ENSE00003662923	632.839	0.297058	0.191957	1.54752	0.121738	0.179874	chr11	86419928	86420053	ENSG00000149201	ENST00000354755	CCDC81	CCDC81-201	13	520.075	397.366	631.129	543.844	699.407	656.868
ENSE00001226288	2203.16	-0.230803	0.186595	-1.23692	0.216117	0.29843	chr11	86422574	86423108	ENSG00000149201	ENST00000354755	CCDC81	CCDC81-201	14	2009.6	2194.84	2190.11	1530.99	1909.73	2007.39
ENSE00002166028	2203.16	-0.230803	0.186595	-1.23692	0.216117	0.29843	chr11	86422574	86423106	ENSG00000149201	ENST00000445632	CCDC81	CCDC81-202	15	2009.6	2194.84	2190.11	1530.99	1909.73	2007.39
ENSE00002187846	2203.16	-0.230803	0.186595	-1.23692	0.216117	0.29843	chr11	86422574	86423109	ENSG00000149201	ENST00000528728	CCDC81	CCDC81-204	10	2009.6	2194.84	2190.11	1530.99	1909.73	2007.39
ENSE00002191116	2203.16	-0.230803	0.186595	-1.23692	0.216117	0.29843	chr11	86422574	86423106	ENSG00000149201	ENST00000525247	CCDC81	CCDC81-203	2	2009.6	2194.84	2190.11	1530.99	1909.73	2007.39
ENSE00002191116	2203.16	-0.230803	0.186595	-1.23692	0.216117	0.29843	chr11	86422574	86423106	ENSG00000149201	ENST00000531587	CCDC81	CCDC81-208	3	2009.6	2194.84	2190.11	1530.99	1909.73	2007.39
ENSE00000999241	20409.7	-0.449592	0.136777	-3.28704	0.00101245	0.00375335	chr11	86441108	86441440	ENSG00000151376	ENST00000524826	ME3	ME3-203	15	19088.8	20192.9	19751.1	13564.1	17789	11878.8
ENSE00000999241	20409.7	-0.449592	0.136777	-3.28704	0.00101245	0.00375335	chr11	86441108	86441440	ENSG00000151376	ENST00000393324	ME3	ME3-202	14	19088.8	20192.9	19751.1	13564.1	17789	11878.8
ENSE00002259254	20408.9	-0.449592	0.136754	-3.28759	0.00101048	0.00375335	chr11	86441110	86441440	ENSG00000151376	ENST00000543262	ME3	ME3-212	15	19088.8	20192.9	19751.1	13564.1	17789	11878.8
ENSE00000999243	12904.4	-0.408736	0.151763	-2.69325	0.00707592	0.0174356	chr11	86442821	86442919	ENSG00000151376	ENST00000543262	ME3	ME3-212	14	12576.7	12815.5	12670.9	8716.35	12022.6	7937.59
ENSE00000999243	12904.4	-0.408736	0.151763	-2.69325	0.00707592	0.0174356	chr11	86442821	86442919	ENSG00000151376	ENST00000393324	ME3	ME3-202	13	12576.7	12815.5	12670.9	8716.35	12022.6	7937.59
ENSE00000999243	12904.4	-0.408736	0.151763	-2.69325	0.00707592	0.0174356	chr11	86442821	86442919	ENSG00000151376	ENST00000524826	ME3	ME3-203	14	12576.7	12815.5	12670.9	8716.35	12022.6	7937.59
ENSE00000999245	7668.87	-0.0695403	0.179372	-0.387688	0.698247	0.763157	chr11	86446314	86446487	ENSG00000151376	ENST00000393324	ME3	ME3-202	12	6384.23	7152.59	6758.74	5540.12	8076.67	5726.14
ENSE00000999245	7668.87	-0.0695403	0.179372	-0.387688	0.698247	0.763157	chr11	86446314	86446487	ENSG00000151376	ENST00000543262	ME3	ME3-212	13	6384.23	7152.59	6758.74	5540.12	8076.67	5726.14
ENSE00000999245	7668.87	-0.0695403	0.179372	-0.387688	0.698247	0.763157	chr11	86446314	86446487	ENSG00000151376	ENST00000524826	ME3	ME3-203	13	6384.23	7152.59	6758.74	5540.12	8076.67	5726.14
ENSE00002192455	2697	0.629698	0.403382	1.56105	0.118513	0.176376	chr11	86446893	86447207	ENSG00000151376	ENST00000530520	ME3	ME3-209	11	1782.01	1811.47	1941.66	1706.94	3689.25	3167.86
ENSE00000999244	2659.41	0.632437	0.40499	1.56161	0.11838	0.176376	chr11	86447065	86447207	ENSG00000151376	ENST00000393324	ME3	ME3-202	11	1751.02	1774.16	1908.7	1680.66	3603.68	3138.95
ENSE00000999244	2659.41	0.632437	0.40499	1.56161	0.11838	0.176376	chr11	86447065	86447207	ENSG00000151376	ENST00000524826	ME3	ME3-203	12	1751.02	1774.16	1908.7	1680.66	3603.68	3138.95
ENSE00000999244	2659.41	0.632437	0.40499	1.56161	0.11838	0.176376	chr11	86447065	86447207	ENSG00000151376	ENST00000543262	ME3	ME3-212	12	1751.02	1774.16	1908.7	1680.66	3603.68	3138.95
ENSE00003514082	5527.7	0.0713724	0.23059	0.309521	0.756925	0.809025	chr11	86448150	86448255	ENSG00000151376	ENST00000530520	ME3	ME3-209	10	4642.9	4194.73	4785.28	3800.05	6284.75	4230.23
ENSE00003602052	5527.7	0.0713724	0.23059	0.309521	0.756925	0.809025	chr11	86448150	86448255	ENSG00000151376	ENST00000524826	ME3	ME3-203	11	4642.9	4194.73	4785.28	3800.05	6284.75	4230.23
ENSE00003602052	5527.7	0.0713724	0.23059	0.309521	0.756925	0.809025	chr11	86448150	86448255	ENSG00000151376	ENST00000543262	ME3	ME3-212	11	4642.9	4194.73	4785.28	3800.05	6284.75	4230.23
ENSE00003602052	5527.7	0.0713724	0.23059	0.309521	0.756925	0.809025	chr11	86448150	86448255	ENSG00000151376	ENST00000393324	ME3	ME3-202	10	4642.9	4194.73	4785.28	3800.05	6284.75	4230.23
ENSE00003639071	6134.47	-0.252025	0.158738	-1.58768	0.112359	0.168435	chr11	86449889	86450002	ENSG00000151376	ENST00000530520	ME3	ME3-209	9	5574.58	5186.28	5892.11	4243.35	5792.43	3950.84
ENSE00003643302	6134.47	-0.252025	0.158738	-1.58768	0.112359	0.168435	chr11	86449889	86450002	ENSG00000151376	ENST00000524826	ME3	ME3-203	10	5574.58	5186.28	5892.11	4243.35	5792.43	3950.84
ENSE00003643302	6134.47	-0.252025	0.158738	-1.58768	0.112359	0.168435	chr11	86449889	86450002	ENSG00000151376	ENST00000393324	ME3	ME3-202	9	5574.58	5186.28	5892.11	4243.35	5792.43	3950.84
ENSE00003643302	6134.47	-0.252025	0.158738	-1.58768	0.112359	0.168435	chr11	86449889	86450002	ENSG00000151376	ENST00000543262	ME3	ME3-212	10	5574.58	5186.28	5892.11	4243.35	5792.43	3950.84
ENSE00002192629	4232.95	-0.352567	0.194602	-1.81173	0.0700273	0.111799	chr11	86449965	86450002	ENSG00000151376	ENST00000526504	ME3	ME3-205	11	3988.21	3787.1	4238.93	2930.59	3887.66	2593.31
ENSE00003476471	6446.98	-0.389964	0.189814	-2.05445	0.0399321	0.0705239	chr11	86450301	86450398	ENSG00000151376	ENST00000526504	ME3	ME3-205	10	6171.17	6268.31	6493.8	4489	5812.27	4149.65
ENSE00003476471	6446.98	-0.389964	0.189814	-2.05445	0.0399321	0.0705239	chr11	86450301	86450398	ENSG00000151376	ENST00000530520	ME3	ME3-209	8	6171.17	6268.31	6493.8	4489	5812.27	4149.65
ENSE00003666539	6446.98	-0.389964	0.189814	-2.05445	0.0399321	0.0705239	chr11	86450301	86450398	ENSG00000151376	ENST00000393324	ME3	ME3-202	8	6171.17	6268.31	6493.8	4489	5812.27	4149.65
ENSE00003666539	6446.98	-0.389964	0.189814	-2.05445	0.0399321	0.0705239	chr11	86450301	86450398	ENSG00000151376	ENST00000524826	ME3	ME3-203	9	6171.17	6268.31	6493.8	4489	5812.27	4149.65
ENSE00003666539	6446.98	-0.389964	0.189814	-2.05445	0.0399321	0.0705239	chr11	86450301	86450398	ENSG00000151376	ENST00000543262	ME3	ME3-212	9	6171.17	6268.31	6493.8	4489	5812.27	4149.65
ENSE00002141250	4649.19	-0.0643641	0.196495	-0.327561	0.743244	0.798029	chr11	86457366	86457759	ENSG00000151376	ENST00000526504	ME3	ME3-205	9	3960.12	4146.23	4004.61	3677.8	5013.66	2894.6
ENSE00002187929	4122.3	-0.066556	0.206371	-0.322507	0.747069	0.801091	chr11	86457579	86457759	ENSG00000151376	ENST00000525957	ME3	ME3-204	5	3435.2	3747	3544.22	3292.77	4476.7	2476.83
ENSE00001469124	251.254	-0.380501	0.470668	-0.808428	0.418844	0.519096	chr11	86464082	86464128	ENSG00000151376	ENST00000323418	ME3	ME3-201	9	296.355	145.514	329.694	191.945	314.981	86.7066
ENSE00003521469	18028.3	-0.270671	0.158796	-1.70452	0.0882844	0.137091	chr11	86465091	86465200	ENSG00000151376	ENST00000530520	ME3	ME3-209	7	16289.9	16350.8	16536.5	12618.1	17431.9	10719.2
ENSE00003521469	18028.3	-0.270671	0.158796	-1.70452	0.0882844	0.137091	chr11	86465091	86465200	ENSG00000151376	ENST00000525957	ME3	ME3-204	4	16289.9	16350.8	16536.5	12618.1	17431.9	10719.2
ENSE00003625356	18028.3	-0.270671	0.158796	-1.70452	0.0882844	0.137091	chr11	86465091	86465200	ENSG00000151376	ENST00000524826	ME3	ME3-203	8	16289.9	16350.8	16536.5	12618.1	17431.9	10719.2
ENSE00003625356	18028.3	-0.270671	0.158796	-1.70452	0.0882844	0.137091	chr11	86465091	86465200	ENSG00000151376	ENST00000526504	ME3	ME3-205	8	16289.9	16350.8	16536.5	12618.1	17431.9	10719.2
ENSE00003625356	18028.3	-0.270671	0.158796	-1.70452	0.0882844	0.137091	chr11	86465091	86465200	ENSG00000151376	ENST00000393324	ME3	ME3-202	7	16289.9	16350.8	16536.5	12618.1	17431.9	10719.2
ENSE00003625356	18028.3	-0.270671	0.158796	-1.70452	0.0882844	0.137091	chr11	86465091	86465200	ENSG00000151376	ENST00000543262	ME3	ME3-212	8	16289.9	16350.8	16536.5	12618.1	17431.9	10719.2
ENSE00003625356	18028.3	-0.270671	0.158796	-1.70452	0.0882844	0.137091	chr11	86465091	86465200	ENSG00000151376	ENST00000323418	ME3	ME3-201	8	16289.9	16350.8	16536.5	12618.1	17431.9	10719.2
ENSE00003492111	12063.8	-0.292321	0.169169	-1.72798	0.0839914	0.131291	chr11	86487337	86487440	ENSG00000151376	ENST00000526504	ME3	ME3-205	7	10944.8	11422.9	11899.6	8325.61	11669.2	7990.14
ENSE00003492111	12063.8	-0.292321	0.169169	-1.72798	0.0839914	0.131291	chr11	86487337	86487440	ENSG00000151376	ENST00000524826	ME3	ME3-203	7	10944.8	11422.9	11899.6	8325.61	11669.2	7990.14
ENSE00003492111	12063.8	-0.292321	0.169169	-1.72798	0.0839914	0.131291	chr11	86487337	86487440	ENSG00000151376	ENST00000393324	ME3	ME3-202	6	10944.8	11422.9	11899.6	8325.61	11669.2	7990.14
ENSE00003492111	12063.8	-0.292321	0.169169	-1.72798	0.0839914	0.131291	chr11	86487337	86487440	ENSG00000151376	ENST00000323418	ME3	ME3-201	7	10944.8	11422.9	11899.6	8325.61	11669.2	7990.14
ENSE00003492111	12063.8	-0.292321	0.169169	-1.72798	0.0839914	0.131291	chr11	86487337	86487440	ENSG00000151376	ENST00000543262	ME3	ME3-212	7	10944.8	11422.9	11899.6	8325.61	11669.2	7990.14
ENSE00003638521	12063.8	-0.292321	0.169169	-1.72798	0.0839914	0.131291	chr11	86487337	86487440	ENSG00000151376	ENST00000530520	ME3	ME3-209	6	10944.8	11422.9	11899.6	8325.61	11669.2	7990.14
ENSE00003638521	12063.8	-0.292321	0.169169	-1.72798	0.0839914	0.131291	chr11	86487337	86487440	ENSG00000151376	ENST00000525957	ME3	ME3-204	3	10944.8	11422.9	11899.6	8325.61	11669.2	7990.14
ENSE00002187724	3.90091	0	3.76924	0	1	1	chr11	86489118	86489179	ENSG00000151376	ENST00000525957	ME3	ME3-204	2	0	0	0	0	0	0
ENSE00003487813	6602.99	0.210784	0.314724	0.669742	0.503022	0.596678	chr11	86497963	86498124	ENSG00000151376	ENST00000543262	ME3	ME3-212	6	5162.01	5333.66	5873.27	4399.88	8287.48	6256.89
ENSE00003487813	6602.99	0.210784	0.314724	0.669742	0.503022	0.596678	chr11	86497963	86498124	ENSG00000151376	ENST00000526504	ME3	ME3-205	6	5162.01	5333.66	5873.27	4399.88	8287.48	6256.89
ENSE00003487813	6602.99	0.210784	0.314724	0.669742	0.503022	0.596678	chr11	86497963	86498124	ENSG00000151376	ENST00000393324	ME3	ME3-202	5	5162.01	5333.66	5873.27	4399.88	8287.48	6256.89
ENSE00003487813	6602.99	0.210784	0.314724	0.669742	0.503022	0.596678	chr11	86497963	86498124	ENSG00000151376	ENST00000524826	ME3	ME3-203	6	5162.01	5333.66	5873.27	4399.88	8287.48	6256.89
ENSE00003487813	6602.99	0.210784	0.314724	0.669742	0.503022	0.596678	chr11	86497963	86498124	ENSG00000151376	ENST00000323418	ME3	ME3-201	6	5162.01	5333.66	5873.27	4399.88	8287.48	6256.89
ENSE00003623248	6602.99	0.210784	0.314724	0.669742	0.503022	0.596678	chr11	86497963	86498124	ENSG00000151376	ENST00000530520	ME3	ME3-209	5	5162.01	5333.66	5873.27	4399.88	8287.48	6256.89
ENSE00003623248	6602.99	0.210784	0.314724	0.669742	0.503022	0.596678	chr11	86497963	86498124	ENSG00000151376	ENST00000525957	ME3	ME3-204	1	5162.01	5333.66	5873.27	4399.88	8287.48	6256.89
ENSE00003580885	9024.23	0.0680569	0.244544	0.278302	0.780781	0.829139	chr11	86508792	86508867	ENSG00000151376	ENST00000530520	ME3	ME3-209	4	7248.12	7797.15	8130.5	6249.63	10331.1	7715.13
ENSE00003610666	9024.23	0.0680569	0.244544	0.278302	0.780781	0.829139	chr11	86508792	86508867	ENSG00000151376	ENST00000526504	ME3	ME3-205	5	7248.12	7797.15	8130.5	6249.63	10331.1	7715.13
ENSE00003610666	9024.23	0.0680569	0.244544	0.278302	0.780781	0.829139	chr11	86508792	86508867	ENSG00000151376	ENST00000323418	ME3	ME3-201	5	7248.12	7797.15	8130.5	6249.63	10331.1	7715.13
ENSE00003610666	9024.23	0.0680569	0.244544	0.278302	0.780781	0.829139	chr11	86508792	86508867	ENSG00000151376	ENST00000393324	ME3	ME3-202	4	7248.12	7797.15	8130.5	6249.63	10331.1	7715.13
ENSE00003610666	9024.23	0.0680569	0.244544	0.278302	0.780781	0.829139	chr11	86508792	86508867	ENSG00000151376	ENST00000524826	ME3	ME3-203	5	7248.12	7797.15	8130.5	6249.63	10331.1	7715.13
ENSE00003610666	9024.23	0.0680569	0.244544	0.278302	0.780781	0.829139	chr11	86508792	86508867	ENSG00000151376	ENST00000543262	ME3	ME3-212	5	7248.12	7797.15	8130.5	6249.63	10331.1	7715.13
ENSE00003528957	11000.5	0.021767	0.25012	0.0870261	0.930651	0.95028	chr11	86556553	86556702	ENSG00000151376	ENST00000530520	ME3	ME3-209	3	9335.2	9129.16	10205.2	7678.94	12087.1	9339.79
ENSE00003594172	11000.5	0.021767	0.25012	0.0870261	0.930651	0.95028	chr11	86556553	86556702	ENSG00000151376	ENST00000393324	ME3	ME3-202	3	9335.2	9129.16	10205.2	7678.94	12087.1	9339.79
ENSE00003594172	11000.5	0.021767	0.25012	0.0870261	0.930651	0.95028	chr11	86556553	86556702	ENSG00000151376	ENST00000323418	ME3	ME3-201	4	9335.2	9129.16	10205.2	7678.94	12087.1	9339.79
ENSE00003594172	11000.5	0.021767	0.25012	0.0870261	0.930651	0.95028	chr11	86556553	86556702	ENSG00000151376	ENST00000526504	ME3	ME3-205	4	9335.2	9129.16	10205.2	7678.94	12087.1	9339.79
ENSE00003594172	11000.5	0.021767	0.25012	0.0870261	0.930651	0.95028	chr11	86556553	86556702	ENSG00000151376	ENST00000524826	ME3	ME3-203	4	9335.2	9129.16	10205.2	7678.94	12087.1	9339.79
ENSE00003594172	11000.5	0.021767	0.25012	0.0870261	0.930651	0.95028	chr11	86556553	86556702	ENSG00000151376	ENST00000543262	ME3	ME3-212	4	9335.2	9129.16	10205.2	7678.94	12087.1	9339.79
ENSE00002191113	10845.5	0.0196946	0.251762	0.0782268	0.937648	0.955054	chr11	86556565	86556702	ENSG00000151376	ENST00000530335	ME3	ME3-208	4	9176.37	9024.69	10075.7	7582.96	11798.2	9284.61
ENSE00002293120	6752.26	0.142187	0.199592	0.712388	0.476224	0.570499	chr11	86559690	86559823	ENSG00000151376	ENST00000323418	ME3	ME3-201	3	5515.5	4981.07	5541.22	4726.64	7087.08	5885.54
ENSE00003617809	6752.26	0.142187	0.199592	0.712388	0.476224	0.570499	chr11	86559690	86559823	ENSG00000151376	ENST00000526504	ME3	ME3-205	3	5515.5	4981.07	5541.22	4726.64	7087.08	5885.54
ENSE00003617809	6752.26	0.142187	0.199592	0.712388	0.476224	0.570499	chr11	86559690	86559823	ENSG00000151376	ENST00000543262	ME3	ME3-212	3	5515.5	4981.07	5541.22	4726.64	7087.08	5885.54
ENSE00003617809	6752.26	0.142187	0.199592	0.712388	0.476224	0.570499	chr11	86559690	86559823	ENSG00000151376	ENST00000530335	ME3	ME3-208	3	5515.5	4981.07	5541.22	4726.64	7087.08	5885.54
ENSE00003617809	6752.26	0.142187	0.199592	0.712388	0.476224	0.570499	chr11	86559690	86559823	ENSG00000151376	ENST00000393324	ME3	ME3-202	2	5515.5	4981.07	5541.22	4726.64	7087.08	5885.54
ENSE00003617809	6752.26	0.142187	0.199592	0.712388	0.476224	0.570499	chr11	86559690	86559823	ENSG00000151376	ENST00000524826	ME3	ME3-203	3	5515.5	4981.07	5541.22	4726.64	7087.08	5885.54
ENSE00003631050	6752.26	0.142187	0.199592	0.712388	0.476224	0.570499	chr11	86559690	86559823	ENSG00000151376	ENST00000530520	ME3	ME3-209	2	5515.5	4981.07	5541.22	4726.64	7087.08	5885.54
ENSE00002191814	0.484241	-3.29602	4.28997	-0.768308	0.442304	NA	chr11	86667739	86668242	ENSG00000151376	ENST00000534638	ME3	ME3-211	2	5.81089	0	0	0	0	0
ENSE00002148638	2665.61	0.184184	0.28414	0.648216	0.516846	0.605673	chr11	86671706	86671958	ENSG00000151376	ENST00000532471	ME3	ME3-210	2	2233.32	1887.96	2092.38	1814.34	2932.8	2313.05
ENSE00002185389	2665.61	0.184184	0.28414	0.648216	0.516846	0.605673	chr11	86671760	86671958	ENSG00000151376	ENST00000526834	ME3	ME3-206	2	2233.32	1887.96	2092.38	1814.34	2932.8	2313.05
ENSE00001706802	2667.52	0.186691	0.284116	0.657095	0.51112	0.604195	chr11	86671762	86672198	ENSG00000151376	ENST00000393324	ME3	ME3-202	1	2233.32	1887.96	2092.38	1814.34	2932.8	2325.31
ENSE00002178188	2665.69	0.184363	0.284137	0.648854	0.516433	0.605673	chr11	86671762	86671965	ENSG00000151376	ENST00000530520	ME3	ME3-209	1	2233.32	1887.96	2092.38	1814.34	2932.8	2313.93
ENSE00002197423	2665.61	0.184184	0.28414	0.648216	0.516846	0.605673	chr11	86671762	86671822	ENSG00000151376	ENST00000534638	ME3	ME3-211	1	2233.32	1887.96	2092.38	1814.34	2932.8	2313.05
ENSE00003784485	2665.61	0.184184	0.28414	0.648216	0.516846	0.605673	chr11	86671762	86671958	ENSG00000151376	ENST00000323418	ME3	ME3-201	2	2233.32	1887.96	2092.38	1814.34	2932.8	2313.05
ENSE00003794570	2665.61	0.184184	0.28414	0.648216	0.516846	0.605673	chr11	86671762	86671958	ENSG00000151376	ENST00000543262	ME3	ME3-212	2	2233.32	1887.96	2092.38	1814.34	2932.8	2313.05
ENSE00003794570	2665.61	0.184184	0.28414	0.648216	0.516846	0.605673	chr11	86671762	86671958	ENSG00000151376	ENST00000526504	ME3	ME3-205	2	2233.32	1887.96	2092.38	1814.34	2932.8	2313.05
ENSE00003794570	2665.61	0.184184	0.28414	0.648216	0.516846	0.605673	chr11	86671762	86671958	ENSG00000151376	ENST00000524826	ME3	ME3-203	2	2233.32	1887.96	2092.38	1814.34	2932.8	2313.05
ENSE00003794570	2665.61	0.184184	0.28414	0.648216	0.516846	0.605673	chr11	86671762	86671958	ENSG00000151376	ENST00000530335	ME3	ME3-208	2	2233.32	1887.96	2092.38	1814.34	2932.8	2313.05
ENSE00003794570	2665.61	0.184184	0.28414	0.648216	0.516846	0.605673	chr11	86671762	86671958	ENSG00000151376	ENST00000526944	ME3	ME3-207	2	2233.32	1887.96	2092.38	1814.34	2932.8	2313.05
ENSE00002148729	0.222014	0	4.40736	0	1	NA	chr11	86672274	86672372	ENSG00000151376	ENST00000526834	ME3	ME3-206	1	0	0	0	0	0	0
ENSE00002159414	1.25392	0	4.40736	0	1	1	chr11	86672274	86672618	ENSG00000151376	ENST00000530335	ME3	ME3-208	1	0	0	0	0	0	0
ENSE00001423157	0.222014	0	4.40736	0	1	NA	chr11	86672298	86672385	ENSG00000151376	ENST00000323418	ME3	ME3-201	1	0	0	0	0	0	0
ENSE00002143626	0.222014	0	4.40736	0	1	NA	chr11	86672298	86672428	ENSG00000151376	ENST00000532471	ME3	ME3-210	1	0	0	0	0	0	0
ENSE00002155101	1.25392	0	4.40736	0	1	1	chr11	86672324	86672613	ENSG00000151376	ENST00000526944	ME3	ME3-207	1	0	0	0	0	0	0
ENSE00002161116	1.25392	0	4.40736	0	1	1	chr11	86672324	86672636	ENSG00000151376	ENST00000543262	ME3	ME3-212	1	0	0	0	0	0	0
ENSE00002161116	1.25392	0	4.40736	0	1	1	chr11	86672324	86672636	ENSG00000151376	ENST00000526504	ME3	ME3-205	1	0	0	0	0	0	0
ENSE00003910998	0.222014	0	4.40736	0	1	NA	chr11	86672324	86672427	ENSG00000151376	ENST00000524826	ME3	ME3-203	1	0	0	0	0	0	0
ENSE00002201706	1.77296	0	4.40414	0	1	1	chr11	86791059	86791195	ENSG00000150687	ENST00000527521	PRSS23	PRSS23-202	1	0	0	0	0	0	0
ENSE00001091986	65.713	1.222	0.742508	1.64577	0.0998116	0.153113	chr11	86800521	86800651	ENSG00000150687	ENST00000533902	PRSS23	PRSS23-209	1	58.1089	36.3786	41.2118	55.9839	55.8038	204.067
ENSE00001091986	65.713	1.222	0.742508	1.64577	0.0998116	0.153113	chr11	86800521	86800651	ENSG00000150687	ENST00000532234	PRSS23	PRSS23-206	1	58.1089	36.3786	41.2118	55.9839	55.8038	204.067
ENSE00002145691	65.713	1.222	0.742508	1.64577	0.0998116	0.153113	chr11	86800542	86800651	ENSG00000150687	ENST00000280258	PRSS23	PRSS23-201	1	58.1089	36.3786	41.2118	55.9839	55.8038	204.067
ENSE00002141922	65.713	1.222	0.742508	1.64577	0.0998116	0.153113	chr11	86800544	86800651	ENSG00000150687	ENST00000531475	PRSS23	PRSS23-204	1	58.1089	36.3786	41.2118	55.9839	55.8038	204.067
ENSE00002141922	65.713	1.222	0.742508	1.64577	0.0998116	0.153113	chr11	86800544	86800651	ENSG00000150687	ENST00000533880	PRSS23	PRSS23-208	1	58.1089	36.3786	41.2118	55.9839	55.8038	204.067
ENSE00002198658	4253.37	0.661772	0.298472	2.2172	0.0266094	0.0499539	chr11	86807631	86808106	ENSG00000150687	ENST00000527521	PRSS23	PRSS23-202	2	3269.59	3305.79	2797.69	3163.66	4526.31	7137.09
ENSE00001315190	20900.5	0.356508	0.313347	1.13774	0.255229	0.342945	chr11	86807631	86811233	ENSG00000150687	ENST00000280258	PRSS23	PRSS23-201	2	17114	18459.8	16076.1	16442.1	18454.9	31230.1
ENSE00002164048	52.6071	-0.040239	0.444555	-0.0905153	0.927878	0.948625	chr11	86823334	86823593	ENSG00000150687	ENST00000531475	PRSS23	PRSS23-204	2	39.7078	52.2359	42.3893	31.9908	27.2818	70.0659
ENSE00003469866	52.6071	-0.040239	0.444555	-0.0905153	0.927878	0.948625	chr11	86823377	86823593	ENSG00000150687	ENST00000532234	PRSS23	PRSS23-206	2	39.7078	52.2359	42.3893	31.9908	27.2818	70.0659
ENSE00003469866	52.6071	-0.040239	0.444555	-0.0905153	0.927878	0.948625	chr11	86823377	86823593	ENSG00000150687	ENST00000533902	PRSS23	PRSS23-209	2	39.7078	52.2359	42.3893	31.9908	27.2818	70.0659
ENSE00003573998	52.6071	-0.040239	0.444555	-0.0905153	0.927878	0.948625	chr11	86823377	86823593	ENSG00000150687	ENST00000533880	PRSS23	PRSS23-208	2	39.7078	52.2359	42.3893	31.9908	27.2818	70.0659
ENSE00002196749	52.0205	-0.0402137	0.444161	-0.0905385	0.927859	0.948625	chr11	86823396	86823593	ENSG00000150687	ENST00000532572	PRSS23	PRSS23-207	1	39.7078	52.2359	42.3893	31.9908	27.2818	70.0659
ENSE00002146016	1.18109	2.86322	4.28023	0.66894	0.503534	0.5967	chr11	86932695	86937819	ENSG00000150687	ENST00000532572	PRSS23	PRSS23-207	2	0.968482	0	0	7.9977	0	0
ENSE00002160715	0.514613	-0.887638	4.40736	-0.201399	0.840386	NA	chr11	86932695	86932893	ENSG00000150687	ENST00000531475	PRSS23	PRSS23-204	3	0.968482	0	0	0	0	0
ENSE00002198303	0.514613	-0.887638	4.40736	-0.201399	0.840386	NA	chr11	86932695	86932934	ENSG00000150687	ENST00000533880	PRSS23	PRSS23-208	3	0.968482	0	0	0	0	0
ENSE00002190582	3.14708	0.312017	1.6461	0.189549	0.849662	0.888529	chr11	86939020	86939126	ENSG00000150687	ENST00000532234	PRSS23	PRSS23-206	3	3.87393	2.79835	0	1.14253	0	7.00659
ENSE00002174426	0	NA	NA	NA	NA	NA	chr11	86940786	86940913	ENSG00000150687	ENST00000528769	PRSS23	PRSS23-203	1	0	0	0	0	0	0
ENSE00002202096	0	NA	NA	NA	NA	NA	chr11	86940786	86941027	ENSG00000150687	ENST00000531521	PRSS23	PRSS23-205	1	0	0	0	0	0	0
ENSE00002148153	42.6013	0.109913	0.527012	0.208559	0.834793	0.875203	chr11	86950356	86950499	ENSG00000150687	ENST00000531521	PRSS23	PRSS23-205	2	34.8653	38.2442	60.0515	29.7057	44.643	68.3143
ENSE00002148153	42.6013	0.109913	0.527012	0.208559	0.834793	0.875203	chr11	86950356	86950499	ENSG00000150687	ENST00000528769	PRSS23	PRSS23-203	2	34.8653	38.2442	60.0515	29.7057	44.643	68.3143
ENSE00002148153	42.6013	0.109913	0.527012	0.208559	0.834793	0.875203	chr11	86950356	86950499	ENSG00000150687	ENST00000532234	PRSS23	PRSS23-206	4	34.8653	38.2442	60.0515	29.7057	44.643	68.3143
ENSE00002180869	5791.85	0.409222	0.192457	2.1263	0.033478	0.0604219	chr11	86951216	86952788	ENSG00000150687	ENST00000532234	PRSS23	PRSS23-206	5	5493.23	5764.61	4526.23	6826.61	6901.07	7234.31
ENSE00002201802	5802.69	0.407286	0.194316	2.096	0.0360818	0.0645551	chr11	86951216	86952910	ENSG00000150687	ENST00000533902	PRSS23	PRSS23-209	3	5505.82	5781.4	4529.77	6836.89	6901.07	7239.56
ENSE00002143522	2500.25	0.363911	0.195029	1.86593	0.0620507	0.100626	chr11	86951216	86951736	ENSG00000150687	ENST00000531521	PRSS23	PRSS23-205	3	2493.84	2598.74	1951.08	2907.74	3106.41	3052.25
ENSE00002153204	977.855	0.390593	0.244452	1.59784	0.11008	0.16532	chr11	86951216	86951407	ENSG00000150687	ENST00000528769	PRSS23	PRSS23-203	3	1014.97	983.155	896.062	1327.62	1386.41	1081.64
ENSE00003522582	120718	0.32158	0.230054	1.39784	0.16216	0.232504	chr12	45919131	45922194	ENSG00000139218	ENST00000369367	SCAF11	SCAF11-202	15	99530.9	107691	107504	147144	110609	135558
ENSE00002369481	3142.49	0.072155	0.172333	0.418695	0.675439	0.746156	chr12	45919131	45919309	ENSG00000139218	ENST00000547654	SCAF11	SCAF11-210	3	3072.02	3219.97	3153.29	3653.81	3015.88	3259.82
ENSE00002369481	3142.49	0.072155	0.172333	0.418695	0.675439	0.746156	chr12	45919131	45919309	ENSG00000139218	ENST00000550629	SCAF11	SCAF11-213	4	3072.02	3219.97	3153.29	3653.81	3015.88	3259.82
ENSE00001521760	54357.3	0.328469	0.222432	1.47671	0.139752	0.203388	chr12	45921409	45922194	ENSG00000139218	ENST00000465950	SCAF11	SCAF11-205	5	43576.8	47845.3	49282.3	67508.6	47215	61954.9
ENSE00003476859	31289	0.314107	0.21347	1.47144	0.141173	0.205274	chr12	45922048	45922194	ENSG00000139218	ENST00000549162	SCAF11	SCAF11-212	9	25268.7	27774.6	28736.4	39457.2	25972.3	36240.7
ENSE00002390536	22530	0.301562	0.131167	2.29907	0.0215008	0.0428975	chr12	45922356	45922582	ENSG00000139218	ENST00000550893	SCAF11	SCAF11-214	3	20217.1	21361.7	20664.8	28933.4	21284.8	26493.7
ENSE00003566497	22455.8	0.301284	0.129973	2.31806	0.0204459	0.0415482	chr12	45922463	45922582	ENSG00000139218	ENST00000550629	SCAF11	SCAF11-213	3	20191.9	21261	20582.4	28812.3	21229	26399.1
ENSE00003566497	22455.8	0.301284	0.129973	2.31806	0.0204459	0.0415482	chr12	45922463	45922582	ENSG00000139218	ENST00000547654	SCAF11	SCAF11-210	2	20191.9	21261	20582.4	28812.3	21229	26399.1
ENSE00003616882	22455.8	0.301284	0.129973	2.31806	0.0204459	0.0415482	chr12	45922463	45922582	ENSG00000139218	ENST00000465950	SCAF11	SCAF11-205	4	20191.9	21261	20582.4	28812.3	21229	26399.1
ENSE00003616882	22455.8	0.301284	0.129973	2.31806	0.0204459	0.0415482	chr12	45922463	45922582	ENSG00000139218	ENST00000549162	SCAF11	SCAF11-212	8	20191.9	21261	20582.4	28812.3	21229	26399.1
ENSE00003616882	22455.8	0.301284	0.129973	2.31806	0.0204459	0.0415482	chr12	45922463	45922582	ENSG00000139218	ENST00000369367	SCAF11	SCAF11-202	14	20191.9	21261	20582.4	28812.3	21229	26399.1
ENSE00003544698	24173.1	0.40941	0.166809	2.45436	0.0141134	0.0307284	chr12	45922936	45923154	ENSG00000139218	ENST00000549162	SCAF11	SCAF11-212	7	20760.4	21011.9	21109.9	30715.7	25399.4	27401
ENSE00003544698	24173.1	0.40941	0.166809	2.45436	0.0141134	0.0307284	chr12	45922936	45923154	ENSG00000139218	ENST00000369367	SCAF11	SCAF11-202	13	20760.4	21011.9	21109.9	30715.7	25399.4	27401
ENSE00003544698	24173.1	0.40941	0.166809	2.45436	0.0141134	0.0307284	chr12	45922936	45923154	ENSG00000139218	ENST00000465950	SCAF11	SCAF11-205	3	20760.4	21011.9	21109.9	30715.7	25399.4	27401
ENSE00003544698	24173.1	0.40941	0.166809	2.45436	0.0141134	0.0307284	chr12	45922936	45923154	ENSG00000139218	ENST00000550893	SCAF11	SCAF11-214	2	20760.4	21011.9	21109.9	30715.7	25399.4	27401
ENSE00003626287	24173.1	0.40941	0.166809	2.45436	0.0141134	0.0307284	chr12	45922936	45923154	ENSG00000139218	ENST00000550629	SCAF11	SCAF11-213	2	20760.4	21011.9	21109.9	30715.7	25399.4	27401
ENSE00002326197	20966.5	0.423621	0.141211	2.99991	0.00270062	0.00799499	chr12	45922984	45923100	ENSG00000139218	ENST00000547654	SCAF11	SCAF11-210	1	18630.7	18070.8	18567.7	26956.8	22816.3	24358.4
ENSE00002370230	8148.85	0.496428	0.110782	4.48112	7.42534e-06	4.34951e-05	chr12	45924728	45924788	ENSG00000139218	ENST00000550629	SCAF11	SCAF11-213	1	7039.89	7297.17	6903.57	10921.4	8695.47	10346.1
ENSE00003749274	8148.85	0.496428	0.110782	4.48112	7.42534e-06	4.34951e-05	chr12	45924728	45924788	ENSG00000139218	ENST00000550893	SCAF11	SCAF11-214	1	7039.89	7297.17	6903.57	10921.4	8695.47	10346.1
ENSE00000887974	45219.7	0.48135	0.152818	3.14982	0.00163372	0.00534442	chr12	45924728	45925074	ENSG00000139218	ENST00000369367	SCAF11	SCAF11-202	12	36673.5	37294.6	38445.9	56492.3	47858.6	52583.6
ENSE00000887974	45219.7	0.48135	0.152818	3.14982	0.00163372	0.00534442	chr12	45924728	45925074	ENSG00000139218	ENST00000549162	SCAF11	SCAF11-212	6	36673.5	37294.6	38445.9	56492.3	47858.6	52583.6
ENSE00000887974	45219.7	0.48135	0.152818	3.14982	0.00163372	0.00534442	chr12	45924728	45925074	ENSG00000139218	ENST00000465950	SCAF11	SCAF11-205	2	36673.5	37294.6	38445.9	56492.3	47858.6	52583.6
ENSE00001866842	37205.1	0.488181	0.124449	3.92273	8.75524e-05	0.000421378	chr12	45924947	45925074	ENSG00000139218	ENST00000547950	SCAF11	SCAF11-211	2	30269.9	30739.9	32154.6	46952.2	40250.6	43475
ENSE00002382709	90354.7	0.422918	0.147136	2.87434	0.00404874	0.0112381	chr12	45926142	45926710	ENSG00000139218	ENST00000547950	SCAF11	SCAF11-211	1	76092.6	76805.5	78230.6	112080	95558.4	102221
ENSE00001800405	319936	0.386179	0.18941	2.03885	0.041465	0.0727627	chr12	45926142	45928859	ENSG00000139218	ENST00000549162	SCAF11	SCAF11-212	5	269631	272466	275716	386362	325068	357393
ENSE00001800405	319936	0.386179	0.18941	2.03885	0.041465	0.0727627	chr12	45926142	45928859	ENSG00000139218	ENST00000369367	SCAF11	SCAF11-202	11	269631	272466	275716	386362	325068	357393
ENSE00001838281	319949	0.386182	0.189466	2.03826	0.0415236	0.0727879	chr12	45926142	45929965	ENSG00000139218	ENST00000465950	SCAF11	SCAF11-205	1	269631	272466	275716	386364	325068	357393
ENSE00002422276	252602	0.367029	0.189668	1.93511	0.0529763	0.0883475	chr12	45926716	45928859	ENSG00000139218	ENST00000547018	SCAF11	SCAF11-209	11	214385	218089	219786	304370	254851	281995
ENSE00001811246	22847.6	0.434516	0.0882611	4.92307	8.51976e-07	5.49942e-06	chr12	45928784	45928859	ENSG00000139218	ENST00000484275	SCAF11	SCAF11-207	6	19562.4	20959.7	20080.7	28652.3	24807.9	28438.9
ENSE00002382348	20013.9	0.313538	0.0997025	3.14474	0.00166237	0.00540763	chr12	45930950	45931612	ENSG00000139218	ENST00000546534	SCAF11	SCAF11-208	2	17765.8	19218.2	19388.4	24974.5	20747.8	24330.4
ENSE00003511524	19989.7	0.313821	0.0996277	3.14994	0.00163307	0.00534442	chr12	45931506	45931612	ENSG00000139218	ENST00000547018	SCAF11	SCAF11-209	10	17736.8	19213.5	19377.8	24944.8	20737.9	24328.6
ENSE00003511524	19989.7	0.313821	0.0996277	3.14994	0.00163307	0.00534442	chr12	45931506	45931612	ENSG00000139218	ENST00000549162	SCAF11	SCAF11-212	4	17736.8	19213.5	19377.8	24944.8	20737.9	24328.6
ENSE00003511524	19989.7	0.313821	0.0996277	3.14994	0.00163307	0.00534442	chr12	45931506	45931612	ENSG00000139218	ENST00000369367	SCAF11	SCAF11-202	10	17736.8	19213.5	19377.8	24944.8	20737.9	24328.6
ENSE00003692245	19989.7	0.313821	0.0996277	3.14994	0.00163307	0.00534442	chr12	45931506	45931612	ENSG00000139218	ENST00000484275	SCAF11	SCAF11-207	5	17736.8	19213.5	19377.8	24944.8	20737.9	24328.6
ENSE00002428986	15302.1	0.425272	0.0690902	6.15531	7.4931e-10	6.59553e-09	chr12	45933131	45933172	ENSG00000139218	ENST00000546534	SCAF11	SCAF11-208	1	13359.2	13813.6	14108.6	19339.6	17347.5	18741.8
ENSE00003622950	20992.9	0.422352	0.0824459	5.12278	3.01059e-07	2.06476e-06	chr12	45933131	45933232	ENSG00000139218	ENST00000484275	SCAF11	SCAF11-207	4	17868.5	18835.7	19215.3	25855.4	23438.8	25639.7
ENSE00003653970	20992.9	0.422352	0.0824459	5.12278	3.01059e-07	2.06476e-06	chr12	45933131	45933232	ENSG00000139218	ENST00000369367	SCAF11	SCAF11-202	9	17868.5	18835.7	19215.3	25855.4	23438.8	25639.7
ENSE00003653970	20992.9	0.422352	0.0824459	5.12278	3.01059e-07	2.06476e-06	chr12	45933131	45933232	ENSG00000139218	ENST00000549162	SCAF11	SCAF11-212	3	17868.5	18835.7	19215.3	25855.4	23438.8	25639.7
ENSE00003653970	20992.9	0.422352	0.0824459	5.12278	3.01059e-07	2.06476e-06	chr12	45933131	45933232	ENSG00000139218	ENST00000547018	SCAF11	SCAF11-209	9	17868.5	18835.7	19215.3	25855.4	23438.8	25639.7
ENSE00003491482	16322.6	0.442235	0.0953871	4.63622	3.54843e-06	2.16323e-05	chr12	45934176	45934285	ENSG00000139218	ENST00000547018	SCAF11	SCAF11-209	8	13899.7	14288.4	14533.6	20284.5	17616.6	20141.3
ENSE00003491482	16322.6	0.442235	0.0953871	4.63622	3.54843e-06	2.16323e-05	chr12	45934176	45934285	ENSG00000139218	ENST00000369367	SCAF11	SCAF11-202	8	13899.7	14288.4	14533.6	20284.5	17616.6	20141.3
ENSE00003579756	16322.6	0.442235	0.0953871	4.63622	3.54843e-06	2.16323e-05	chr12	45934176	45934285	ENSG00000139218	ENST00000484275	SCAF11	SCAF11-207	3	13899.7	14288.4	14533.6	20284.5	17616.6	20141.3
ENSE00003684507	16322.6	0.442235	0.0953871	4.63622	3.54843e-06	2.16323e-05	chr12	45934176	45934285	ENSG00000139218	ENST00000549162	SCAF11	SCAF11-212	2	13899.7	14288.4	14533.6	20284.5	17616.6	20141.3
ENSE00002351410	7867.72	0.386448	0.09064	4.26355	2.01202e-05	0.00010894	chr12	45934447	45934510	ENSG00000139218	ENST00000549162	SCAF11	SCAF11-212	1	6933.36	7355.01	7428.72	9798.33	8637.18	9947.61
ENSE00003465581	7862.59	0.386716	0.0908602	4.25617	2.07963e-05	0.000111865	chr12	45934447	45934505	ENSG00000139218	ENST00000484275	SCAF11	SCAF11-207	2	6923.68	7355.01	7421.66	9783.47	8637.18	9945.86
ENSE00003536357	7862.59	0.386716	0.0908602	4.25617	2.07963e-05	0.000111865	chr12	45934447	45934505	ENSG00000139218	ENST00000369367	SCAF11	SCAF11-202	7	6923.68	7355.01	7421.66	9783.47	8637.18	9945.86
ENSE00003536357	7862.59	0.386716	0.0908602	4.25617	2.07963e-05	0.000111865	chr12	45934447	45934505	ENSG00000139218	ENST00000547018	SCAF11	SCAF11-209	7	6923.68	7355.01	7421.66	9783.47	8637.18	9945.86
ENSE00001935570	0	NA	NA	NA	NA	NA	chr12	45934976	45935083	ENSG00000139218	ENST00000484275	SCAF11	SCAF11-207	1	0	0	0	0	0	0
ENSE00002400089	5674.32	0.221105	0.132197	1.67255	0.0944164	0.146199	chr12	45945084	45945313	ENSG00000139218	ENST00000551391	SCAF11	SCAF11-215	2	5500.98	5507.16	5735.51	7073.4	5280.28	7158.99
ENSE00001700360	5671.53	0.221411	0.131972	1.67771	0.0934031	0.144766	chr12	45945249	45945313	ENSG00000139218	ENST00000547018	SCAF11	SCAF11-209	6	5500.98	5503.43	5730.8	7067.68	5280.28	7158.99
ENSE00001700360	5671.53	0.221411	0.131972	1.67771	0.0934031	0.144766	chr12	45945249	45945313	ENSG00000139218	ENST00000369367	SCAF11	SCAF11-202	6	5500.98	5503.43	5730.8	7067.68	5280.28	7158.99
ENSE00001722333	6645.37	0.17228	0.179598	0.959254	0.337431	0.432226	chr12	45948437	45948537	ENSG00000139218	ENST00000369367	SCAF11	SCAF11-202	5	6597.3	6688.06	6752.85	8788.33	5690.75	8098.74
ENSE00001722333	6645.37	0.17228	0.179598	0.959254	0.337431	0.432226	chr12	45948437	45948537	ENSG00000139218	ENST00000547018	SCAF11	SCAF11-209	5	6597.3	6688.06	6752.85	8788.33	5690.75	8098.74
ENSE00002420286	6569.66	0.166718	0.1785	0.93399	0.350309	0.445946	chr12	45948437	45948530	ENSG00000139218	ENST00000551391	SCAF11	SCAF11-215	1	6553.72	6619.04	6752.85	8696.93	5636.18	8031.31
ENSE00001787450	4072.8	0.185554	0.189903	0.9771	0.328519	0.421796	chr12	45948530	45948537	ENSG00000139218	ENST00000266589	SCAF11	SCAF11-201	6	4150.91	4170.48	4211.85	5647.52	3599.96	5004.46
ENSE00001648848	8329.98	0.278594	0.149913	1.85836	0.0631173	0.102255	chr12	45951650	45951727	ENSG00000139218	ENST00000266589	SCAF11	SCAF11-201	5	7952.2	7931.47	8174.07	11041.4	7487.63	10650
ENSE00001648848	8329.98	0.278594	0.149913	1.85836	0.0631173	0.102255	chr12	45951650	45951727	ENSG00000139218	ENST00000369367	SCAF11	SCAF11-202	4	7952.2	7931.47	8174.07	11041.4	7487.63	10650
ENSE00002406660	8339.38	0.27782	0.150256	1.84898	0.0644604	0.103998	chr12	45951650	45951752	ENSG00000139218	ENST00000547018	SCAF11	SCAF11-209	4	7957.05	7941.73	8194.08	11051.7	7487.63	10666.7
ENSE00001521742	245.806	0.380826	0.338771	1.12414	0.260953	0.348644	chr12	45954734	45956192	ENSG00000139218	ENST00000395454	SCAF11	SCAF11-204	4	170.453	305.021	221.366	365.609	246.777	295.153
ENSE00001521739	787.379	-0.109868	0.241634	-0.454687	0.649334	0.724613	chr12	45960455	45961322	ENSG00000139218	ENST00000395453	SCAF11	SCAF11-203	4	815.462	919.725	934.919	1023.71	615.082	834.66
ENSE00001932312	15910.4	0.473441	0.123086	3.84643	0.000119852	0.000558855	chr12	45961407	45961857	ENSG00000139218	ENST00000474828	SCAF11	SCAF11-206	3	13443.5	14254.8	14192.2	20142.8	17403.3	20612.5
ENSE00002348902	15874.2	0.472717	0.119505	3.95563	7.63329e-05	0.000368458	chr12	45961696	45961857	ENSG00000139218	ENST00000547018	SCAF11	SCAF11-209	3	13443.5	14249.2	14161.6	20094.8	17403.3	20581
ENSE00001768974	15870.7	0.47392	0.119601	3.96251	7.41654e-05	0.000360107	chr12	45961700	45961857	ENSG00000139218	ENST00000395453	SCAF11	SCAF11-203	3	13408.6	14249.2	14161.6	20094.8	17403.3	20581
ENSE00001768974	15870.7	0.47392	0.119601	3.96251	7.41654e-05	0.000360107	chr12	45961700	45961857	ENSG00000139218	ENST00000266589	SCAF11	SCAF11-201	4	13408.6	14249.2	14161.6	20094.8	17403.3	20581
ENSE00001768974	15870.7	0.47392	0.119601	3.96251	7.41654e-05	0.000360107	chr12	45961700	45961857	ENSG00000139218	ENST00000369367	SCAF11	SCAF11-202	3	13408.6	14249.2	14161.6	20094.8	17403.3	20581
ENSE00001768974	15870.7	0.47392	0.119601	3.96251	7.41654e-05	0.000360107	chr12	45961700	45961857	ENSG00000139218	ENST00000395454	SCAF11	SCAF11-204	3	13408.6	14249.2	14161.6	20094.8	17403.3	20581
ENSE00003514236	9343.22	0.715597	0.0911786	7.8483	4.21711e-15	5.9328e-14	chr12	45964107	45964188	ENSG00000139218	ENST00000369367	SCAF11	SCAF11-202	2	7242.31	7770.09	7444.03	12197.6	11080.2	13593.7
ENSE00003514236	9343.22	0.715597	0.0911786	7.8483	4.21711e-15	5.9328e-14	chr12	45964107	45964188	ENSG00000139218	ENST00000395454	SCAF11	SCAF11-204	2	7242.31	7770.09	7444.03	12197.6	11080.2	13593.7
ENSE00003514236	9343.22	0.715597	0.0911786	7.8483	4.21711e-15	5.9328e-14	chr12	45964107	45964188	ENSG00000139218	ENST00000395453	SCAF11	SCAF11-203	2	7242.31	7770.09	7444.03	12197.6	11080.2	13593.7
ENSE00003569194	9343.22	0.715597	0.0911786	7.8483	4.21711e-15	5.9328e-14	chr12	45964107	45964188	ENSG00000139218	ENST00000547018	SCAF11	SCAF11-209	2	7242.31	7770.09	7444.03	12197.6	11080.2	13593.7
ENSE00003569194	9343.22	0.715597	0.0911786	7.8483	4.21711e-15	5.9328e-14	chr12	45964107	45964188	ENSG00000139218	ENST00000474828	SCAF11	SCAF11-206	2	7242.31	7770.09	7444.03	12197.6	11080.2	13593.7
ENSE00003627780	9343.22	0.715597	0.0911786	7.8483	4.21711e-15	5.9328e-14	chr12	45964107	45964188	ENSG00000139218	ENST00000266589	SCAF11	SCAF11-201	3	7242.31	7770.09	7444.03	12197.6	11080.2	13593.7
ENSE00002220358	126.664	1.06667	0.526167	2.02724	0.0426374	0.0744233	chr12	45974190	45975734	ENSG00000139218	ENST00000266589	SCAF11	SCAF11-201	2	138.493	97.0096	44.7442	118.823	259.178	210.198
ENSE00001521740	5388.22	1.03215	0.173696	5.94224	2.81148e-09	2.33722e-08	chr12	45990353	45990580	ENSG00000139218	ENST00000395453	SCAF11	SCAF11-203	1	3891.36	3699.42	3984.59	7016.27	7103.2	9549.11
ENSE00001521743	5388.22	1.03215	0.173696	5.94224	2.81148e-09	2.33722e-08	chr12	45990353	45990584	ENSG00000139218	ENST00000395454	SCAF11	SCAF11-204	1	3891.36	3699.42	3984.59	7016.27	7103.2	9549.11
ENSE00001521773	5388.22	1.03215	0.173696	5.94224	2.81148e-09	2.33722e-08	chr12	45990353	45990576	ENSG00000139218	ENST00000474828	SCAF11	SCAF11-206	1	3891.36	3699.42	3984.59	7016.27	7103.2	9549.11
ENSE00001685697	5388.22	1.03215	0.173696	5.94224	2.81148e-09	2.33722e-08	chr12	45990353	45990565	ENSG00000139218	ENST00000266589	SCAF11	SCAF11-201	1	3891.36	3699.42	3984.59	7016.27	7103.2	9549.11
ENSE00003850068	5388.22	1.03215	0.173696	5.94224	2.81148e-09	2.33722e-08	chr12	45990353	45990574	ENSG00000139218	ENST00000369367	SCAF11	SCAF11-202	1	3891.36	3699.42	3984.59	7016.27	7103.2	9549.11
ENSE00002250410	23.1555	-1.24252	1.2877	-0.964914	0.334588	0.428919	chr12	45991885	45992120	ENSG00000139218	ENST00000547018	SCAF11	SCAF11-209	1	10.6533	20.5213	47.0992	4.57011	0	28.0264
ENSE00002333153	2001.15	0.247291	0.133487	1.85254	0.0639485	0.103297	chr12	101280105	101280327	ENSG00000120800	ENST00000261637	UTP20	UTP20-201	1	1842.05	1802.14	1836.87	1916.02	2129.22	2457.56
ENSE00001195080	2001.15	0.247291	0.133487	1.85254	0.0639485	0.103297	chr12	101280128	101280327	ENSG00000120800	ENST00000551825	UTP20	UTP20-203	1	1842.05	1802.14	1836.87	1916.02	2129.22	2457.56
ENSE00003577246	3370.04	-0.0905937	0.0713006	-1.27059	0.203875	0.283907	chr12	101281116	101281196	ENSG00000120800	ENST00000551825	UTP20	UTP20-203	2	3445.86	3486.75	3339.33	3031.13	3375.51	3242.3
ENSE00003616459	3370.04	-0.0905937	0.0713006	-1.27059	0.203875	0.283907	chr12	101281116	101281196	ENSG00000120800	ENST00000261637	UTP20	UTP20-201	2	3445.86	3486.75	3339.33	3031.13	3375.51	3242.3
ENSE00003644966	4447.53	-0.243152	0.0904213	-2.6891	0.00716443	0.0175486	chr12	101285570	101285636	ENSG00000120800	ENST00000261637	UTP20	UTP20-201	3	4772.68	4649.93	5102.02	3987.43	3960.83	4318.69
ENSE00003660866	4447.53	-0.243152	0.0904213	-2.6891	0.00716443	0.0175486	chr12	101285570	101285636	ENSG00000120800	ENST00000551825	UTP20	UTP20-203	3	4772.68	4649.93	5102.02	3987.43	3960.83	4318.69
ENSE00003523918	7712.42	-0.32473	0.0616838	-5.26444	1.40619e-07	9.76621e-07	chr12	101285749	101285881	ENSG00000120800	ENST00000551825	UTP20	UTP20-203	4	8666.94	8305.51	8526.13	6884.88	6361.63	7105.56
ENSE00003545723	7712.42	-0.32473	0.0616838	-5.26444	1.40619e-07	9.76621e-07	chr12	101285749	101285881	ENSG00000120800	ENST00000261637	UTP20	UTP20-201	4	8666.94	8305.51	8526.13	6884.88	6361.63	7105.56
ENSE00003518604	11202.7	-0.270918	0.136367	-1.98669	0.0469568	0.0800942	chr12	101286321	101286509	ENSG00000120800	ENST00000261637	UTP20	UTP20-201	5	11585	12005.9	11735.9	9505.84	9724.74	10047.5
ENSE00003693019	11202.7	-0.270918	0.136367	-1.98669	0.0469568	0.0800942	chr12	101286321	101286509	ENSG00000120800	ENST00000551825	UTP20	UTP20-203	5	11585	12005.9	11735.9	9505.84	9724.74	10047.5
ENSE00003497143	5348.49	-0.235969	0.0766063	-3.08028	0.00206808	0.00633903	chr12	101288960	101289041	ENSG00000120800	ENST00000551825	UTP20	UTP20-203	6	5822.51	5977.28	5793.2	4764.34	5037.22	5135.83
ENSE00003533765	5348.49	-0.235969	0.0766063	-3.08028	0.00206808	0.00633903	chr12	101288960	101289041	ENSG00000120800	ENST00000261637	UTP20	UTP20-201	6	5822.51	5977.28	5793.2	4764.34	5037.22	5135.83
ENSE00002424278	4416.95	-0.368494	0.0693868	-5.31073	1.09187e-07	7.88254e-07	chr12	101289903	101290274	ENSG00000120800	ENST00000551998	UTP20	UTP20-204	1	5039.01	5062.22	4820.6	3843.47	3623.53	4086.59
ENSE00003496009	4415.79	-0.368497	0.0695273	-5.30003	1.15785e-07	8.24619e-07	chr12	101290137	101290274	ENSG00000120800	ENST00000261637	UTP20	UTP20-201	7	5039.01	5062.22	4820.6	3843.47	3623.53	4086.59
ENSE00003572202	4415.79	-0.368497	0.0695273	-5.30003	1.15785e-07	8.24619e-07	chr12	101290137	101290274	ENSG00000120800	ENST00000551825	UTP20	UTP20-203	7	5039.01	5062.22	4820.6	3843.47	3623.53	4086.59
ENSE00000922769	5928.51	-0.288997	0.0491193	-5.88358	4.01495e-09	3.22371e-08	chr12	101290733	101290888	ENSG00000120800	ENST00000261637	UTP20	UTP20-201	8	6553.72	6511.77	6676.31	5307.05	5395.61	5452
ENSE00002329693	5931.04	-0.287778	0.0496285	-5.79864	6.68548e-09	5.26522e-08	chr12	101290733	101291427	ENSG00000120800	ENST00000551825	UTP20	UTP20-203	8	6553.72	6511.77	6676.31	5312.76	5395.61	5459.89
ENSE00002408252	5930.88	-0.287778	0.0496455	-5.79666	6.76499e-09	5.30247e-08	chr12	101290733	101290961	ENSG00000120800	ENST00000551998	UTP20	UTP20-204	2	6553.72	6511.77	6676.31	5312.76	5395.61	5459.89
ENSE00000922770	5804.46	-0.275851	0.0624878	-4.41448	1.01253e-05	5.80707e-05	chr12	101291742	101291888	ENSG00000120800	ENST00000261637	UTP20	UTP20-201	9	6378.42	6290.7	7074.3	5409.87	5553.1	5341.65
ENSE00000922771	6298.44	-0.241852	0.0834676	-2.89755	0.00376087	0.0106364	chr12	101291970	101292104	ENSG00000120800	ENST00000261637	UTP20	UTP20-201	10	6696.08	6793.47	7498.19	5992.56	5798.63	5953.85
ENSE00000937742	4733.42	-0.27677	0.0745403	-3.71302	0.000204799	0.000923561	chr12	101293168	101293245	ENSG00000120800	ENST00000261637	UTP20	UTP20-201	11	5106.8	5270.23	5536.51	4243.35	4285.73	4600.7
ENSE00000937743	5047.44	-0.243511	0.0768513	-3.16859	0.00153178	0.00510386	chr12	101295480	101295658	ENSG00000120800	ENST00000261637	UTP20	UTP20-201	12	5298.56	5515.55	5815.57	4508.42	4756.96	4778.5
ENSE00000937744	5907.38	-0.297287	0.0903669	-3.28978	0.00100266	0.00374289	chr12	101299682	101299837	ENSG00000120800	ENST00000261637	UTP20	UTP20-201	13	6474.3	6219.81	6983.63	5176.8	5405.53	5428.36
ENSE00000937745	5232.01	-0.310104	0.0968365	-3.20234	0.00136314	0.00466473	chr12	101299973	101300061	ENSG00000120800	ENST00000261637	UTP20	UTP20-201	14	5618.16	5840.16	6240.64	4484.43	4771.84	5015.84
ENSE00000937746	5630.61	-0.235222	0.0929279	-2.53123	0.0113665	0.0258772	chr12	101302448	101302553	ENSG00000120800	ENST00000261637	UTP20	UTP20-201	15	5804.11	6385.84	6478.5	5187.08	4883.45	5783.07
ENSE00000937747	6845.61	-0.271012	0.120957	-2.24057	0.0250541	0.0474558	chr12	101305915	101306065	ENSG00000120800	ENST00000261637	UTP20	UTP20-201	16	6746.44	7492.12	8141.1	6057.69	5435.29	7047.76
ENSE00000937748	4149.27	-0.408604	0.151369	-2.6994	0.00694647	0.0172457	chr12	101306699	101306761	ENSG00000120800	ENST00000261637	UTP20	UTP20-201	17	4250.67	4922.3	5284.53	3592.11	2996.04	4298.54
ENSE00000937749	9967.73	-0.33882	0.118928	-2.84895	0.00438637	0.011836	chr12	101308185	101308343	ENSG00000120800	ENST00000261637	UTP20	UTP20-201	18	10449	10362.3	11832.5	8876.31	7364.86	9564
ENSE00000937750	8459.27	-0.401959	0.115359	-3.48443	0.000493187	0.00201937	chr12	101309763	101309839	ENSG00000120800	ENST00000261637	UTP20	UTP20-201	19	9067.9	9367.95	9939.11	7649.23	5923.88	7896.43
ENSE00000937751	8165.12	-0.400657	0.113108	-3.54226	0.000396717	0.00167007	chr12	101311719	101311798	ENSG00000120800	ENST00000261637	UTP20	UTP20-201	20	8804.47	8774.7	9523.46	7263.06	5746.55	7515.45
ENSE00000937752	9765.27	-0.33269	0.137542	-2.41883	0.0155706	0.0329002	chr12	101312036	101312276	ENSG00000120800	ENST00000261637	UTP20	UTP20-201	21	10491.6	10548.9	10578.5	8590.67	7063.52	9449.27
ENSE00000937753	7491.32	-0.213864	0.0651864	-3.28081	0.00103509	0.00380304	chr12	101317478	101317663	ENSG00000120800	ENST00000261637	UTP20	UTP20-201	22	8295.05	7778.49	7644.2	6751.2	6452.16	7241.31
ENSE00000937754	6373.24	-0.210667	0.106782	-1.97287	0.0485101	0.0822324	chr12	101319545	101319635	ENSG00000120800	ENST00000261637	UTP20	UTP20-201	23	6631.19	6380.25	7150.84	6126.24	5311.28	5981.88
ENSE00000937755	5754.5	-0.214496	0.0847624	-2.53055	0.0113882	0.025891	chr12	101320852	101320937	ENSG00000120800	ENST00000261637	UTP20	UTP20-201	24	6041.39	5887.74	6741.07	5490.99	4925.61	5666.58
ENSE00000937756	5920.93	-0.251149	0.11793	-2.12964	0.0332016	0.0600548	chr12	101321504	101321629	ENSG00000120800	ENST00000261637	UTP20	UTP20-201	25	6015.24	6149.85	7163.79	5598.39	4672.64	5963.49
ENSE00002368449	7096.5	-0.099408	0.0806923	-1.23194	0.217972	0.300487	chr12	101326855	101327247	ENSG00000120800	ENST00000551345	UTP20	UTP20-202	1	7176.45	7078.9	7937.39	7059.69	6329.39	7317.51
ENSE00000922778	7094.29	-0.0994012	0.0802326	-1.23891	0.215377	0.29841	chr12	101327081	101327247	ENSG00000120800	ENST00000261637	UTP20	UTP20-201	26	7176.45	7078.9	7937.39	7059.69	6329.39	7317.51
ENSE00000922779	9683.23	-0.27808	0.105634	-2.63248	0.00847637	0.0201912	chr12	101329241	101329449	ENSG00000120800	ENST00000261637	UTP20	UTP20-201	27	10025.7	10029.3	11096.6	8564.4	8394.13	8729.34
ENSE00002339713	6293.45	-0.184322	0.0909505	-2.02662	0.0427011	0.0744555	chr12	101329241	101329345	ENSG00000120800	ENST00000551345	UTP20	UTP20-202	2	6422	6439.94	7144.95	5868.03	5982.16	5755.92
ENSE00000922780	7769.73	-0.395935	0.0877554	-4.5118	6.42799e-06	3.80593e-05	chr12	101333301	101333444	ENSG00000120800	ENST00000261637	UTP20	UTP20-201	28	8383.18	8363.35	9052.47	6373.03	6283.51	6945.28
ENSE00000922781	6047.19	-0.400513	0.0895019	-4.47491	7.64448e-06	4.46199e-05	chr12	101334425	101334504	ENSG00000120800	ENST00000261637	UTP20	UTP20-201	29	7159.02	6242.19	6681.02	5087.68	4779.28	5343.4
ENSE00000922783	11195	-0.393712	0.0992533	-3.96674	7.28636e-05	0.000355886	chr12	101338051	101338277	ENSG00000120800	ENST00000261637	UTP20	UTP20-201	30	12553.5	11551.6	13465.7	9678.36	8943.49	9971.26
ENSE00000922784	5802.97	-0.379659	0.118132	-3.21386	0.00130962	0.00452863	chr12	101338813	101338957	ENSG00000120800	ENST00000261637	UTP20	UTP20-201	31	6341.62	6052.84	7236.79	5253.35	4254.73	5574.62
ENSE00000922786	4672.47	-0.343405	0.120719	-2.84467	0.00444581	0.0119768	chr12	101340523	101340610	ENSG00000120800	ENST00000261637	UTP20	UTP20-201	32	4907.3	4921.37	5424.65	4183.94	3253.98	4577.93
ENSE00000922788	5660.34	-0.41118	0.0969295	-4.24206	2.21479e-05	0.000118494	chr12	101342446	101342589	ENSG00000120800	ENST00000261637	UTP20	UTP20-201	33	6194.41	5866.28	6857.64	4866.03	4314.25	5040.37
ENSE00000497875	2560.24	-0.635788	0.0921869	-6.89672	5.32164e-12	5.09268e-11	chr12	101342787	101342837	ENSG00000120800	ENST00000261637	UTP20	UTP20-201	34	3020.69	2961.59	3325.2	1884.03	1927.09	2172.92
ENSE00000922790	4233.09	-0.493555	0.107315	-4.59913	4.24268e-06	2.57692e-05	chr12	101342941	101343093	ENSG00000120800	ENST00000261637	UTP20	UTP20-201	35	4804.64	4689.11	5133.81	3415.02	3146.09	3822.97
ENSE00000818178	6157.19	-0.348127	0.117966	-2.95107	0.00316672	0.00920922	chr12	101344595	101344750	ENSG00000120800	ENST00000261637	UTP20	UTP20-201	36	6573.09	6676.87	7306.26	5712.64	4486.62	5944.22
ENSE00001154956	6487.96	-0.361241	0.121292	-2.97827	0.00289882	0.00852046	chr12	101345554	101345694	ENSG00000120800	ENST00000261637	UTP20	UTP20-201	37	7063.14	6852.23	8041.01	6240.49	4735.88	6111.5
ENSE00001154949	6710.7	-0.301416	0.108184	-2.78613	0.00533411	0.0140704	chr12	101346451	101346588	ENSG00000120800	ENST00000261637	UTP20	UTP20-201	38	7638.42	7047.19	8070.45	6113.67	5329.88	7014.47
ENSE00001154941	6558.95	-0.448101	0.131173	-3.4161	0.000635258	0.00252569	chr12	101352055	101352194	ENSG00000120800	ENST00000261637	UTP20	UTP20-201	39	7959.95	6860.63	8296.52	5100.25	4977.7	6860.33
ENSE00001154936	4561.61	-0.5143	0.122375	-4.20265	2.63804e-05	0.000140525	chr12	101353047	101353129	ENSG00000120800	ENST00000261637	UTP20	UTP20-201	40	5149.42	4890.59	6076.97	3700.65	3236.62	4339.71
ENSE00000753967	6550.18	-0.341146	0.125364	-2.72123	0.0065039	0.016245	chr12	101354832	101355118	ENSG00000120800	ENST00000261637	UTP20	UTP20-201	41	7429.22	6563.07	7923.26	5722.93	5049.62	6522.26
ENSE00001154922	5294.71	-0.144738	0.0954352	-1.51661	0.129366	0.190256	chr12	101356554	101356693	ENSG00000120800	ENST00000261637	UTP20	UTP20-201	42	5502.91	5307.54	5329.27	4912.87	4783	4902.86
ENSE00001154914	6166.56	-0.15766	0.0641671	-2.45703	0.0140091	0.0306229	chr12	101356926	101357082	ENSG00000120800	ENST00000261637	UTP20	UTP20-201	43	6640.88	6209.55	6379.59	5596.11	5572.94	6064.21
ENSE00000753970	3484.14	-0.29894	0.101371	-2.94897	0.00318834	0.0092232	chr12	101361962	101362060	ENSG00000120800	ENST00000261637	UTP20	UTP20-201	44	4059.88	3671.44	3644.3	3068.83	2832.35	3342.14
ENSE00001154901	5279.48	-0.285833	0.106476	-2.68447	0.00726449	0.0177409	chr12	101363576	101363743	ENSG00000120800	ENST00000261637	UTP20	UTP20-201	45	5893.21	5572.45	5696.65	4433.01	4733.4	4909.87
ENSE00001154893	5928.86	-0.203613	0.0871907	-2.33526	0.0195296	0.0399326	chr12	101365459	101365625	ENSG00000120800	ENST00000261637	UTP20	UTP20-201	46	6407.48	6365.32	6384.3	5116.24	5720.51	5797.08
ENSE00001154886	6270.89	-0.101208	0.0787414	-1.28532	0.198679	0.278557	chr12	101366558	101366699	ENSG00000120800	ENST00000261637	UTP20	UTP20-201	47	6146.95	6529.49	6241.82	5594.96	5865.6	6173.68
ENSE00001154877	5771.76	-0.0646177	0.0786532	-0.821551	0.411332	0.510598	chr12	101367860	101367976	ENSG00000120800	ENST00000261637	UTP20	UTP20-201	48	5762.47	5477.31	5821.46	5348.18	5554.34	5410.84
ENSE00001154867	6485.88	-0.134212	0.0663202	-2.0237	0.0430008	0.0748988	chr12	101369721	101369891	ENSG00000120800	ENST00000261637	UTP20	UTP20-201	49	6675.75	6187.16	6666.89	5858.89	5923.88	6009.03
ENSE00001154862	7224.07	-0.235234	0.0917444	-2.56402	0.0103469	0.0238529	chr12	101370432	101370563	ENSG00000120800	ENST00000261637	UTP20	UTP20-201	50	7620.98	7501.45	7152.01	6029.12	6103.69	6787.64
ENSE00001154851	7404.72	-0.17775	0.0994666	-1.78703	0.0739319	0.117124	chr12	101371058	101371168	ENSG00000120800	ENST00000261637	UTP20	UTP20-201	51	7566.75	7524.77	7421.66	5898.88	6612.13	7388.45
ENSE00001154843	4369.09	-0.143609	0.112289	-1.27892	0.200924	0.280747	chr12	101372884	101372963	ENSG00000120800	ENST00000261637	UTP20	UTP20-201	52	4666.15	4326.25	4712.28	3638.95	4164.2	4598.95
ENSE00001154832	3469.49	-0.213098	0.0853495	-2.49677	0.0125331	0.0279154	chr12	101373401	101373470	ENSG00000120800	ENST00000261637	UTP20	UTP20-201	53	3597.91	3644.39	3924.54	2991.14	3046.89	3586.5
ENSE00001154825	4883.26	-0.331367	0.106023	-3.12543	0.00177547	0.00570786	chr12	101373585	101373767	ENSG00000120800	ENST00000261637	UTP20	UTP20-201	54	5026.42	5287.02	5971	4332.47	3998.03	4606.83
ENSE00001154819	4995.74	-0.38722	0.127838	-3.029	0.00245364	0.00741044	chr12	101374808	101374939	ENSG00000120800	ENST00000261637	UTP20	UTP20-201	55	5205.59	5367.24	6027.52	4716.36	3572.68	4400.14
ENSE00001154814	4389.45	-0.343464	0.118743	-2.89249	0.00382203	0.0107539	chr12	101375624	101375756	ENSG00000120800	ENST00000261637	UTP20	UTP20-201	56	4600.29	4897.12	5190.33	4294.77	3187.02	4090.1
ENSE00001154805	5548.52	-0.311496	0.0932425	-3.34071	0.000835638	0.00318394	chr12	101379371	101379558	ENSG00000120800	ENST00000261637	UTP20	UTP20-201	57	5775.06	6522.03	6353.68	4900.31	4627.99	5494.92
ENSE00001154796	5007.5	-0.259529	0.112117	-2.3148	0.0206238	0.041755	chr12	101381140	101381211	ENSG00000120800	ENST00000261637	UTP20	UTP20-201	58	5251.11	5494.1	5792.02	4196.51	4246.05	5365.3
ENSE00001154785	7789.37	-0.147995	0.103188	-1.43423	0.151507	0.219333	chr12	101383041	101383313	ENSG00000120800	ENST00000261637	UTP20	UTP20-201	59	7772.07	8333.5	8508.47	6732.92	7292.93	8183.7
ENSE00001154780	4130.32	-0.189673	0.0909765	-2.08486	0.0370819	0.0662723	chr12	101383543	101383669	ENSG00000120800	ENST00000261637	UTP20	UTP20-201	60	4264.23	3936.35	4777.04	3828.61	3726.45	3819.47
ENSE00001154773	4679.29	-0.325641	0.134094	-2.42845	0.0151635	0.0321639	chr12	101385583	101385728	ENSG00000120800	ENST00000261637	UTP20	UTP20-201	61	5018.67	4598.63	6048.72	4267.34	4066.24	4164.54
ENSE00001195076	4349.33	-0.382975	0.124248	-3.08234	0.00205377	0.0063187	chr12	101385968	101386618	ENSG00000120800	ENST00000261637	UTP20	UTP20-201	62	4686.48	4483.89	5520.03	3963.43	3239.1	4057.69
ENSE00002199051	9786.8	0.285546	0.24187	1.18057	0.237773	0.32345	chr14	73058532	73058705	ENSG00000119707	ENST00000527432	RBM25	RBM25-205	1	9219.95	8025.68	8596.78	8333.6	10997.1	12166.9
ENSE00002140794	9786.8	0.285546	0.24187	1.18057	0.237773	0.32345	chr14	73058533	73058705	ENSG00000119707	ENST00000531500	RBM25	RBM25-209	1	9219.95	8025.68	8596.78	8333.6	10997.1	12166.9
ENSE00002171062	9786.8	0.285546	0.24187	1.18057	0.237773	0.32345	chr14	73058534	73058705	ENSG00000119707	ENST00000261973	RBM25	RBM25-201	1	9219.95	8025.68	8596.78	8333.6	10997.1	12166.9
ENSE00002185121	9786.8	0.285546	0.24187	1.18057	0.237773	0.32345	chr14	73058542	73058705	ENSG00000119707	ENST00000532683	RBM25	RBM25-212	1	9219.95	8025.68	8596.78	8333.6	10997.1	12166.9
ENSE00002160146	9786.8	0.285546	0.24187	1.18057	0.237773	0.32345	chr14	73058547	73058705	ENSG00000119707	ENST00000525321	RBM25	RBM25-203	1	9219.95	8025.68	8596.78	8333.6	10997.1	12166.9
ENSE00002175108	9786.8	0.285546	0.24187	1.18057	0.237773	0.32345	chr14	73058549	73058705	ENSG00000119707	ENST00000526754	RBM25	RBM25-204	1	9219.95	8025.68	8596.78	8333.6	10997.1	12166.9
ENSE00002175238	9535.18	0.236647	0.232465	1.01799	0.308684	0.400389	chr14	73058668	73058811	ENSG00000119707	ENST00000525161	RBM25	RBM25-202	1	9079.52	7992.1	8510.83	8175.94	10615.1	11350.7
ENSE00002163266	329.304	0.0400119	0.263097	0.152081	0.879123	0.910659	chr14	73064972	73065093	ENSG00000119707	ENST00000531500	RBM25	RBM25-209	2	349.622	358.189	287.305	290.202	354.664	378.356
ENSE00002184792	36.2022	-0.0984651	0.4591	-0.214474	0.830177	0.871475	chr14	73069853	73069920	ENSG00000119707	ENST00000527432	RBM25	RBM25-205	2	31.9599	31.7147	45.9217	34.2759	26.0418	41.1637
ENSE00003556304	24405.2	-0.158687	0.0718554	-2.20842	0.0272153	0.0508472	chr14	73071627	73071747	ENSG00000119707	ENST00000532683	RBM25	RBM25-212	2	26894.7	24690.8	24099.5	21438.4	23390.5	22974.6
ENSE00003571796	24405.2	-0.158687	0.0718554	-2.20842	0.0272153	0.0508472	chr14	73071627	73071747	ENSG00000119707	ENST00000531500	RBM25	RBM25-209	3	26894.7	24690.8	24099.5	21438.4	23390.5	22974.6
ENSE00003571796	24405.2	-0.158687	0.0718554	-2.20842	0.0272153	0.0508472	chr14	73071627	73071747	ENSG00000119707	ENST00000526754	RBM25	RBM25-204	2	26894.7	24690.8	24099.5	21438.4	23390.5	22974.6
ENSE00003571796	24405.2	-0.158687	0.0718554	-2.20842	0.0272153	0.0508472	chr14	73071627	73071747	ENSG00000119707	ENST00000525321	RBM25	RBM25-203	2	26894.7	24690.8	24099.5	21438.4	23390.5	22974.6
ENSE00003571796	24405.2	-0.158687	0.0718554	-2.20842	0.0272153	0.0508472	chr14	73071627	73071747	ENSG00000119707	ENST00000525161	RBM25	RBM25-202	2	26894.7	24690.8	24099.5	21438.4	23390.5	22974.6
ENSE00003571796	24405.2	-0.158687	0.0718554	-2.20842	0.0272153	0.0508472	chr14	73071627	73071747	ENSG00000119707	ENST00000261973	RBM25	RBM25-201	2	26894.7	24690.8	24099.5	21438.4	23390.5	22974.6
ENSE00003571796	24405.2	-0.158687	0.0718554	-2.20842	0.0272153	0.0508472	chr14	73071627	73071747	ENSG00000119707	ENST00000527432	RBM25	RBM25-205	3	26894.7	24690.8	24099.5	21438.4	23390.5	22974.6
ENSE00002193314	24347.2	-0.159613	0.0722255	-2.20992	0.0271107	0.0507671	chr14	73071637	73071747	ENSG00000119707	ENST00000528081	RBM25	RBM25-207	1	26847.3	24657.2	24087.7	21385.9	23361.9	22929.1
ENSE00003558080	26230.5	-0.385816	0.0632831	-6.09667	1.08298e-09	9.43165e-09	chr14	73076319	73076368	ENSG00000119707	ENST00000531500	RBM25	RBM25-209	4	31115.4	28971.4	29166.2	22758	23125.1	22429
ENSE00003558080	26230.5	-0.385816	0.0632831	-6.09667	1.08298e-09	9.43165e-09	chr14	73076319	73076368	ENSG00000119707	ENST00000525321	RBM25	RBM25-203	3	31115.4	28971.4	29166.2	22758	23125.1	22429
ENSE00003558080	26230.5	-0.385816	0.0632831	-6.09667	1.08298e-09	9.43165e-09	chr14	73076319	73076368	ENSG00000119707	ENST00000525161	RBM25	RBM25-202	3	31115.4	28971.4	29166.2	22758	23125.1	22429
ENSE00003558080	26230.5	-0.385816	0.0632831	-6.09667	1.08298e-09	9.43165e-09	chr14	73076319	73076368	ENSG00000119707	ENST00000528081	RBM25	RBM25-207	2	31115.4	28971.4	29166.2	22758	23125.1	22429
ENSE00003558080	26230.5	-0.385816	0.0632831	-6.09667	1.08298e-09	9.43165e-09	chr14	73076319	73076368	ENSG00000119707	ENST00000526754	RBM25	RBM25-204	3	31115.4	28971.4	29166.2	22758	23125.1	22429
ENSE00003558080	26230.5	-0.385816	0.0632831	-6.09667	1.08298e-09	9.43165e-09	chr14	73076319	73076368	ENSG00000119707	ENST00000261973	RBM25	RBM25-201	3	31115.4	28971.4	29166.2	22758	23125.1	22429
ENSE00003558080	26230.5	-0.385816	0.0632831	-6.09667	1.08298e-09	9.43165e-09	chr14	73076319	73076368	ENSG00000119707	ENST00000527432	RBM25	RBM25-205	4	31115.4	28971.4	29166.2	22758	23125.1	22429
ENSE00003682144	26230.5	-0.385816	0.0632831	-6.09667	1.08298e-09	9.43165e-09	chr14	73076319	73076368	ENSG00000119707	ENST00000532683	RBM25	RBM25-212	3	31115.4	28971.4	29166.2	22758	23125.1	22429
ENSE00003585442	52195.3	-0.588784	0.0793926	-7.41611	1.20613e-13	1.4927e-12	chr14	73077369	73077536	ENSG00000119707	ENST00000261973	RBM25	RBM25-201	4	64029.2	60746.7	63745.2	43971.4	38226.8	43145.7
ENSE00003585442	52195.3	-0.588784	0.0793926	-7.41611	1.20613e-13	1.4927e-12	chr14	73077369	73077536	ENSG00000119707	ENST00000531500	RBM25	RBM25-209	5	64029.2	60746.7	63745.2	43971.4	38226.8	43145.7
ENSE00003585442	52195.3	-0.588784	0.0793926	-7.41611	1.20613e-13	1.4927e-12	chr14	73077369	73077536	ENSG00000119707	ENST00000525161	RBM25	RBM25-202	4	64029.2	60746.7	63745.2	43971.4	38226.8	43145.7
ENSE00003585442	52195.3	-0.588784	0.0793926	-7.41611	1.20613e-13	1.4927e-12	chr14	73077369	73077536	ENSG00000119707	ENST00000525321	RBM25	RBM25-203	4	64029.2	60746.7	63745.2	43971.4	38226.8	43145.7
ENSE00003585442	52195.3	-0.588784	0.0793926	-7.41611	1.20613e-13	1.4927e-12	chr14	73077369	73077536	ENSG00000119707	ENST00000526754	RBM25	RBM25-204	4	64029.2	60746.7	63745.2	43971.4	38226.8	43145.7
ENSE00003585442	52195.3	-0.588784	0.0793926	-7.41611	1.20613e-13	1.4927e-12	chr14	73077369	73077536	ENSG00000119707	ENST00000528081	RBM25	RBM25-207	3	64029.2	60746.7	63745.2	43971.4	38226.8	43145.7
ENSE00003585442	52195.3	-0.588784	0.0793926	-7.41611	1.20613e-13	1.4927e-12	chr14	73077369	73077536	ENSG00000119707	ENST00000527432	RBM25	RBM25-205	5	64029.2	60746.7	63745.2	43971.4	38226.8	43145.7
ENSE00003686277	52195.3	-0.588784	0.0793926	-7.41611	1.20613e-13	1.4927e-12	chr14	73077369	73077536	ENSG00000119707	ENST00000532683	RBM25	RBM25-212	4	64029.2	60746.7	63745.2	43971.4	38226.8	43145.7
ENSE00003626524	31194.5	-0.716786	0.0954313	-7.51102	5.867e-14	7.4861e-13	chr14	73083494	73083551	ENSG00000119707	ENST00000532683	RBM25	RBM25-212	5	40021.5	37581.9	40679.6	25184.8	21247.6	25532
ENSE00003787165	31194.5	-0.716786	0.0954313	-7.51102	5.867e-14	7.4861e-13	chr14	73083494	73083551	ENSG00000119707	ENST00000531500	RBM25	RBM25-209	6	40021.5	37581.9	40679.6	25184.8	21247.6	25532
ENSE00003787165	31194.5	-0.716786	0.0954313	-7.51102	5.867e-14	7.4861e-13	chr14	73083494	73083551	ENSG00000119707	ENST00000527432	RBM25	RBM25-205	6	40021.5	37581.9	40679.6	25184.8	21247.6	25532
ENSE00003787165	31194.5	-0.716786	0.0954313	-7.51102	5.867e-14	7.4861e-13	chr14	73083494	73083551	ENSG00000119707	ENST00000525321	RBM25	RBM25-203	5	40021.5	37581.9	40679.6	25184.8	21247.6	25532
ENSE00003787165	31194.5	-0.716786	0.0954313	-7.51102	5.867e-14	7.4861e-13	chr14	73083494	73083551	ENSG00000119707	ENST00000261973	RBM25	RBM25-201	5	40021.5	37581.9	40679.6	25184.8	21247.6	25532
ENSE00003787165	31194.5	-0.716786	0.0954313	-7.51102	5.867e-14	7.4861e-13	chr14	73083494	73083551	ENSG00000119707	ENST00000525161	RBM25	RBM25-202	5	40021.5	37581.9	40679.6	25184.8	21247.6	25532
ENSE00003787165	31194.5	-0.716786	0.0954313	-7.51102	5.867e-14	7.4861e-13	chr14	73083494	73083551	ENSG00000119707	ENST00000526754	RBM25	RBM25-204	5	40021.5	37581.9	40679.6	25184.8	21247.6	25532
ENSE00003544212	51731	-0.66199	0.0920398	-7.19243	6.36475e-13	7.43006e-12	chr14	73088001	73088161	ENSG00000119707	ENST00000531500	RBM25	RBM25-209	7	66686.8	59555.5	63926.6	41630.3	35209.7	43341.9
ENSE00003544212	51731	-0.66199	0.0920398	-7.19243	6.36475e-13	7.43006e-12	chr14	73088001	73088161	ENSG00000119707	ENST00000525321	RBM25	RBM25-203	6	66686.8	59555.5	63926.6	41630.3	35209.7	43341.9
ENSE00003544212	51731	-0.66199	0.0920398	-7.19243	6.36475e-13	7.43006e-12	chr14	73088001	73088161	ENSG00000119707	ENST00000261973	RBM25	RBM25-201	6	66686.8	59555.5	63926.6	41630.3	35209.7	43341.9
ENSE00003544212	51731	-0.66199	0.0920398	-7.19243	6.36475e-13	7.43006e-12	chr14	73088001	73088161	ENSG00000119707	ENST00000526754	RBM25	RBM25-204	6	66686.8	59555.5	63926.6	41630.3	35209.7	43341.9
ENSE00003544212	51731	-0.66199	0.0920398	-7.19243	6.36475e-13	7.43006e-12	chr14	73088001	73088161	ENSG00000119707	ENST00000527432	RBM25	RBM25-205	7	66686.8	59555.5	63926.6	41630.3	35209.7	43341.9
ENSE00003563126	51731	-0.66199	0.0920398	-7.19243	6.36475e-13	7.43006e-12	chr14	73088001	73088161	ENSG00000119707	ENST00000532683	RBM25	RBM25-212	6	66686.8	59555.5	63926.6	41630.3	35209.7	43341.9
ENSE00003565891	51731	-0.66199	0.0920398	-7.19243	6.36475e-13	7.43006e-12	chr14	73088001	73088161	ENSG00000119707	ENST00000528081	RBM25	RBM25-207	4	66686.8	59555.5	63926.6	41630.3	35209.7	43341.9
ENSE00002181948	1500.15	-0.435328	0.140316	-3.10249	0.00191901	0.00597107	chr14	73088370	73088474	ENSG00000119707	ENST00000528081	RBM25	RBM25-207	5	1699.69	1514.84	1766.22	1264.78	1129.72	1286.59
ENSE00003471212	47314.7	-0.648614	0.108269	-5.99077	2.08852e-09	1.79985e-08	chr14	73096915	73097100	ENSG00000119707	ENST00000532683	RBM25	RBM25-212	7	60079.8	54686.4	57643.5	39137.3	31650.7	39187
ENSE00003471212	47314.7	-0.648614	0.108269	-5.99077	2.08852e-09	1.79985e-08	chr14	73096915	73097100	ENSG00000119707	ENST00000528081	RBM25	RBM25-207	6	60079.8	54686.4	57643.5	39137.3	31650.7	39187
ENSE00003786581	47314.7	-0.648614	0.108269	-5.99077	2.08852e-09	1.79985e-08	chr14	73096915	73097100	ENSG00000119707	ENST00000531500	RBM25	RBM25-209	8	60079.8	54686.4	57643.5	39137.3	31650.7	39187
ENSE00003786581	47314.7	-0.648614	0.108269	-5.99077	2.08852e-09	1.79985e-08	chr14	73096915	73097100	ENSG00000119707	ENST00000526754	RBM25	RBM25-204	7	60079.8	54686.4	57643.5	39137.3	31650.7	39187
ENSE00003786581	47314.7	-0.648614	0.108269	-5.99077	2.08852e-09	1.79985e-08	chr14	73096915	73097100	ENSG00000119707	ENST00000525321	RBM25	RBM25-203	7	60079.8	54686.4	57643.5	39137.3	31650.7	39187
ENSE00003786581	47314.7	-0.648614	0.108269	-5.99077	2.08852e-09	1.79985e-08	chr14	73096915	73097100	ENSG00000119707	ENST00000527432	RBM25	RBM25-205	8	60079.8	54686.4	57643.5	39137.3	31650.7	39187
ENSE00003786581	47314.7	-0.648614	0.108269	-5.99077	2.08852e-09	1.79985e-08	chr14	73096915	73097100	ENSG00000119707	ENST00000261973	RBM25	RBM25-201	7	60079.8	54686.4	57643.5	39137.3	31650.7	39187
ENSE00002165165	26278	-0.602112	0.0963354	-6.25017	4.10006e-10	3.70562e-09	chr14	73097036	73097100	ENSG00000119707	ENST00000532192	RBM25	RBM25-210	1	33507.5	30559	31601.2	22588.9	18612.4	21820.3
ENSE00003554367	22013.1	-0.636039	0.126029	-5.04677	4.49334e-07	2.9716e-06	chr14	73099380	73099433	ENSG00000119707	ENST00000526754	RBM25	RBM25-204	8	28578	26412.7	26747.6	19426.4	14917	18251.3
ENSE00003554367	22013.1	-0.636039	0.126029	-5.04677	4.49334e-07	2.9716e-06	chr14	73099380	73099433	ENSG00000119707	ENST00000527432	RBM25	RBM25-205	9	28578	26412.7	26747.6	19426.4	14917	18251.3
ENSE00003554367	22013.1	-0.636039	0.126029	-5.04677	4.49334e-07	2.9716e-06	chr14	73099380	73099433	ENSG00000119707	ENST00000261973	RBM25	RBM25-201	8	28578	26412.7	26747.6	19426.4	14917	18251.3
ENSE00003554367	22013.1	-0.636039	0.126029	-5.04677	4.49334e-07	2.9716e-06	chr14	73099380	73099433	ENSG00000119707	ENST00000525321	RBM25	RBM25-203	8	28578	26412.7	26747.6	19426.4	14917	18251.3
ENSE00003554367	22013.1	-0.636039	0.126029	-5.04677	4.49334e-07	2.9716e-06	chr14	73099380	73099433	ENSG00000119707	ENST00000532192	RBM25	RBM25-210	2	28578	26412.7	26747.6	19426.4	14917	18251.3
ENSE00003555650	22013.1	-0.636039	0.126029	-5.04677	4.49334e-07	2.9716e-06	chr14	73099380	73099433	ENSG00000119707	ENST00000528081	RBM25	RBM25-207	7	28578	26412.7	26747.6	19426.4	14917	18251.3
ENSE00003555650	22013.1	-0.636039	0.126029	-5.04677	4.49334e-07	2.9716e-06	chr14	73099380	73099433	ENSG00000119707	ENST00000532683	RBM25	RBM25-212	8	28578	26412.7	26747.6	19426.4	14917	18251.3
ENSE00003589521	22629.9	-0.733411	0.155709	-4.71013	2.47556e-06	1.52613e-05	chr14	73099667	73099750	ENSG00000119707	ENST00000261973	RBM25	RBM25-201	9	29760.5	27824	28760	19701.8	13979.5	18251.3
ENSE00003589521	22629.9	-0.733411	0.155709	-4.71013	2.47556e-06	1.52613e-05	chr14	73099667	73099750	ENSG00000119707	ENST00000526754	RBM25	RBM25-204	9	29760.5	27824	28760	19701.8	13979.5	18251.3
ENSE00003589521	22629.9	-0.733411	0.155709	-4.71013	2.47556e-06	1.52613e-05	chr14	73099667	73099750	ENSG00000119707	ENST00000527432	RBM25	RBM25-205	10	29760.5	27824	28760	19701.8	13979.5	18251.3
ENSE00003589521	22629.9	-0.733411	0.155709	-4.71013	2.47556e-06	1.52613e-05	chr14	73099667	73099750	ENSG00000119707	ENST00000532192	RBM25	RBM25-210	3	29760.5	27824	28760	19701.8	13979.5	18251.3
ENSE00003692455	22629.9	-0.733411	0.155709	-4.71013	2.47556e-06	1.52613e-05	chr14	73099667	73099750	ENSG00000119707	ENST00000528081	RBM25	RBM25-207	8	29760.5	27824	28760	19701.8	13979.5	18251.3
ENSE00002177570	30150.1	-0.705009	0.15477	-4.55521	5.23332e-06	3.12103e-05	chr14	73099667	73103478	ENSG00000119707	ENST00000532683	RBM25	RBM25-212	9	39979.9	36288.1	36185.1	26266.7	18719.1	23995.8
ENSE00002198167	22911.5	-0.735621	0.162398	-4.52973	5.90591e-06	3.50943e-05	chr14	73099667	73101179	ENSG00000119707	ENST00000525321	RBM25	RBM25-203	9	30015.2	28122.5	28982.5	19898.3	14024.1	18396.7
ENSE00002189643	3312.62	-0.398114	0.150301	-2.64877	0.00807849	0.0193329	chr14	73100301	73100362	ENSG00000119707	ENST00000526754	RBM25	RBM25-204	10	3993.05	3771.25	4072.9	3537.27	2483.89	2960.29
ENSE00002195780	3406.31	-0.408452	0.154589	-2.64219	0.00823728	0.0196501	chr14	73100301	73100995	ENSG00000119707	ENST00000532192	RBM25	RBM25-210	4	4141.23	3925.16	4151.79	3650.38	2533.49	3020.72
ENSE00002167255	6.04153	0.124785	2.65063	0.0470774	0.962452	0.972496	chr14	73100714	73101179	ENSG00000119707	ENST00000526754	RBM25	RBM25-204	11	0	12.1262	0	7.9977	0	5.25494
ENSE00003550039	13748.1	-0.762108	0.152737	-4.98967	6.04812e-07	3.95048e-06	chr14	73103192	73103478	ENSG00000119707	ENST00000528081	RBM25	RBM25-207	9	19909.1	17056	16140.9	11902.9	8467.29	10941.7
ENSE00003578826	13748.1	-0.762108	0.152737	-4.98967	6.04812e-07	3.95048e-06	chr14	73103192	73103478	ENSG00000119707	ENST00000261973	RBM25	RBM25-201	10	19909.1	17056	16140.9	11902.9	8467.29	10941.7
ENSE00003578826	13748.1	-0.762108	0.152737	-4.98967	6.04812e-07	3.95048e-06	chr14	73103192	73103478	ENSG00000119707	ENST00000527432	RBM25	RBM25-205	11	19909.1	17056	16140.9	11902.9	8467.29	10941.7
ENSE00003643756	15906.3	-0.59113	0.17512	-3.37558	0.000736612	0.00286634	chr14	73105859	73106081	ENSG00000119707	ENST00000261973	RBM25	RBM25-201	11	21533.2	17760.2	16173.9	13671.5	10171.2	12977.1
ENSE00003643756	15906.3	-0.59113	0.17512	-3.37558	0.000736612	0.00286634	chr14	73105859	73106081	ENSG00000119707	ENST00000527432	RBM25	RBM25-205	12	21533.2	17760.2	16173.9	13671.5	10171.2	12977.1
ENSE00003662093	15906.3	-0.59113	0.17512	-3.37558	0.000736612	0.00286634	chr14	73105859	73106081	ENSG00000119707	ENST00000532683	RBM25	RBM25-212	10	21533.2	17760.2	16173.9	13671.5	10171.2	12977.1
ENSE00003662093	15906.3	-0.59113	0.17512	-3.37558	0.000736612	0.00286634	chr14	73105859	73106081	ENSG00000119707	ENST00000528081	RBM25	RBM25-207	10	21533.2	17760.2	16173.9	13671.5	10171.2	12977.1
ENSE00003513307	22446.6	-0.761125	0.131237	-5.79963	6.64626e-09	5.25949e-08	chr14	73106196	73106285	ENSG00000119707	ENST00000532683	RBM25	RBM25-212	11	29881.5	25456.6	30084.6	16971.1	14335.4	19091.2
ENSE00003513307	22446.6	-0.761125	0.131237	-5.79963	6.64626e-09	5.25949e-08	chr14	73106196	73106285	ENSG00000119707	ENST00000528081	RBM25	RBM25-207	11	29881.5	25456.6	30084.6	16971.1	14335.4	19091.2
ENSE00003584983	22446.6	-0.761125	0.131237	-5.79963	6.64626e-09	5.25949e-08	chr14	73106196	73106285	ENSG00000119707	ENST00000261973	RBM25	RBM25-201	12	29881.5	25456.6	30084.6	16971.1	14335.4	19091.2
ENSE00003584983	22446.6	-0.761125	0.131237	-5.79963	6.64626e-09	5.25949e-08	chr14	73106196	73106285	ENSG00000119707	ENST00000527432	RBM25	RBM25-205	13	29881.5	25456.6	30084.6	16971.1	14335.4	19091.2
ENSE00002183964	18269.7	-0.771267	0.138975	-5.5497	2.86163e-08	2.1508e-07	chr14	73106280	73106285	ENSG00000119707	ENST00000532483	RBM25	RBM25-211	1	23785.9	20685.4	25293.4	13511.5	12057.3	15302.4
ENSE00002152792	32311.6	-0.703586	0.101396	-6.93896	3.95006e-12	3.96451e-11	chr14	73107302	73107899	ENSG00000119707	ENST00000527449	RBM25	RBM25-206	1	42994.8	35610	40933.9	24845.4	21578.7	26971.9
ENSE00003509629	32287.2	-0.702697	0.101337	-6.93424	4.08397e-12	4.04924e-11	chr14	73107826	73107899	ENSG00000119707	ENST00000528081	RBM25	RBM25-207	12	42966.7	35571.7	40904.5	24839.7	21578.7	26964
ENSE00003509629	32287.2	-0.702697	0.101337	-6.93424	4.08397e-12	4.04924e-11	chr14	73107826	73107899	ENSG00000119707	ENST00000532683	RBM25	RBM25-212	12	42966.7	35571.7	40904.5	24839.7	21578.7	26964
ENSE00003509629	32287.2	-0.702697	0.101337	-6.93424	4.08397e-12	4.04924e-11	chr14	73107826	73107899	ENSG00000119707	ENST00000532483	RBM25	RBM25-211	2	42966.7	35571.7	40904.5	24839.7	21578.7	26964
ENSE00003645897	32287.2	-0.702697	0.101337	-6.93424	4.08397e-12	4.04924e-11	chr14	73107826	73107899	ENSG00000119707	ENST00000261973	RBM25	RBM25-201	13	42966.7	35571.7	40904.5	24839.7	21578.7	26964
ENSE00003645897	32287.2	-0.702697	0.101337	-6.93424	4.08397e-12	4.04924e-11	chr14	73107826	73107899	ENSG00000119707	ENST00000527432	RBM25	RBM25-205	14	42966.7	35571.7	40904.5	24839.7	21578.7	26964
ENSE00002140788	39197.5	-0.608643	0.0946586	-6.42988	1.27706e-10	1.18092e-09	chr14	73109131	73109492	ENSG00000119707	ENST00000530978	RBM25	RBM25-208	1	51931	42181.4	47454.8	30935.1	28252.8	33648.3
ENSE00003602466	39193.7	-0.608714	0.0947434	-6.42488	1.31976e-10	1.20685e-09	chr14	73109342	73109492	ENSG00000119707	ENST00000532683	RBM25	RBM25-212	13	51931	42181.4	47454.8	30930.5	28252.8	33648.3
ENSE00003602466	39193.7	-0.608714	0.0947434	-6.42488	1.31976e-10	1.20685e-09	chr14	73109342	73109492	ENSG00000119707	ENST00000527449	RBM25	RBM25-206	2	51931	42181.4	47454.8	30930.5	28252.8	33648.3
ENSE00003602466	39193.7	-0.608714	0.0947434	-6.42488	1.31976e-10	1.20685e-09	chr14	73109342	73109492	ENSG00000119707	ENST00000532483	RBM25	RBM25-211	3	51931	42181.4	47454.8	30930.5	28252.8	33648.3
ENSE00003602466	39193.7	-0.608714	0.0947434	-6.42488	1.31976e-10	1.20685e-09	chr14	73109342	73109492	ENSG00000119707	ENST00000528081	RBM25	RBM25-207	13	51931	42181.4	47454.8	30930.5	28252.8	33648.3
ENSE00003651881	39193.7	-0.608714	0.0947434	-6.42488	1.31976e-10	1.20685e-09	chr14	73109342	73109492	ENSG00000119707	ENST00000261973	RBM25	RBM25-201	14	51931	42181.4	47454.8	30930.5	28252.8	33648.3
ENSE00003651881	39193.7	-0.608714	0.0947434	-6.42488	1.31976e-10	1.20685e-09	chr14	73109342	73109492	ENSG00000119707	ENST00000527432	RBM25	RBM25-205	15	51931	42181.4	47454.8	30930.5	28252.8	33648.3
ENSE00003583737	57499.7	-0.552541	0.0815082	-6.77897	1.21038e-11	1.13845e-10	chr14	73110831	73111155	ENSG00000119707	ENST00000527432	RBM25	RBM25-205	16	70264.3	62605.7	65451.4	46168.4	42827.5	46220.7
ENSE00003583737	57499.7	-0.552541	0.0815082	-6.77897	1.21038e-11	1.13845e-10	chr14	73110831	73111155	ENSG00000119707	ENST00000261973	RBM25	RBM25-201	15	70264.3	62605.7	65451.4	46168.4	42827.5	46220.7
ENSE00003615747	57499.7	-0.552541	0.0815082	-6.77897	1.21038e-11	1.13845e-10	chr14	73110831	73111155	ENSG00000119707	ENST00000532483	RBM25	RBM25-211	4	70264.3	62605.7	65451.4	46168.4	42827.5	46220.7
ENSE00003615747	57499.7	-0.552541	0.0815082	-6.77897	1.21038e-11	1.13845e-10	chr14	73110831	73111155	ENSG00000119707	ENST00000528081	RBM25	RBM25-207	14	70264.3	62605.7	65451.4	46168.4	42827.5	46220.7
ENSE00002162493	109729	-0.560516	0.125696	-4.45931	8.22258e-06	4.76562e-05	chr14	73110831	73111802	ENSG00000119707	ENST00000527449	RBM25	RBM25-206	3	131174	119226	127711	87886.7	79670.4	88822.6
ENSE00002162493	109729	-0.560516	0.125696	-4.45931	8.22258e-06	4.76562e-05	chr14	73110831	73111802	ENSG00000119707	ENST00000532683	RBM25	RBM25-212	14	131174	119226	127711	87886.7	79670.4	88822.6
ENSE00002158610	18521.3	-0.399738	0.121607	-3.28712	0.00101217	0.00375335	chr14	73110831	73110909	ENSG00000119707	ENST00000530978	RBM25	RBM25-208	2	23026.6	19221	19688.6	15608.1	14747.1	16590.7
ENSE00002144071	625.832	0.0498485	0.204893	0.24329	0.807781	0.852859	chr14	73111309	73111382	ENSG00000119707	ENST00000532483	RBM25	RBM25-211	5	741.857	640.823	567.545	671.807	603.921	742.699
ENSE00003535471	75277.3	-0.64706	0.109132	-5.92916	3.04482e-09	2.50589e-08	chr14	73111528	73111802	ENSG00000119707	ENST00000261973	RBM25	RBM25-201	16	92853.2	85792.9	93032.7	59861.7	53124	60500.2
ENSE00003535471	75277.3	-0.64706	0.109132	-5.92916	3.04482e-09	2.50589e-08	chr14	73111528	73111802	ENSG00000119707	ENST00000527432	RBM25	RBM25-205	17	92853.2	85792.9	93032.7	59861.7	53124	60500.2
ENSE00003580031	75277.3	-0.64706	0.109132	-5.92916	3.04482e-09	2.50589e-08	chr14	73111528	73111802	ENSG00000119707	ENST00000528081	RBM25	RBM25-207	15	92853.2	85792.9	93032.7	59861.7	53124	60500.2
ENSE00003580031	75277.3	-0.64706	0.109132	-5.92916	3.04482e-09	2.50589e-08	chr14	73111528	73111802	ENSG00000119707	ENST00000532483	RBM25	RBM25-211	6	92853.2	85792.9	93032.7	59861.7	53124	60500.2
ENSE00003493754	40126.9	-0.654943	0.0709471	-9.23142	2.67063e-20	7.57908e-19	chr14	73112152	73112250	ENSG00000119707	ENST00000528081	RBM25	RBM25-207	16	50129.6	46232.5	51155.6	32602.1	28845.6	32234.7
ENSE00003493754	40126.9	-0.654943	0.0709471	-9.23142	2.67063e-20	7.57908e-19	chr14	73112152	73112250	ENSG00000119707	ENST00000532483	RBM25	RBM25-211	7	50129.6	46232.5	51155.6	32602.1	28845.6	32234.7
ENSE00003493754	40126.9	-0.654943	0.0709471	-9.23142	2.67063e-20	7.57908e-19	chr14	73112152	73112250	ENSG00000119707	ENST00000532683	RBM25	RBM25-212	15	50129.6	46232.5	51155.6	32602.1	28845.6	32234.7
ENSE00003493754	40126.9	-0.654943	0.0709471	-9.23142	2.67063e-20	7.57908e-19	chr14	73112152	73112250	ENSG00000119707	ENST00000527449	RBM25	RBM25-206	4	50129.6	46232.5	51155.6	32602.1	28845.6	32234.7
ENSE00003540930	40126.9	-0.654943	0.0709471	-9.23142	2.67063e-20	7.57908e-19	chr14	73112152	73112250	ENSG00000119707	ENST00000261973	RBM25	RBM25-201	17	50129.6	46232.5	51155.6	32602.1	28845.6	32234.7
ENSE00003540930	40126.9	-0.654943	0.0709471	-9.23142	2.67063e-20	7.57908e-19	chr14	73112152	73112250	ENSG00000119707	ENST00000527432	RBM25	RBM25-205	18	50129.6	46232.5	51155.6	32602.1	28845.6	32234.7
ENSE00003460776	36005.6	-0.642932	0.0881504	-7.29358	3.01818e-13	3.65289e-12	chr14	73114286	73114333	ENSG00000119707	ENST00000527449	RBM25	RBM25-206	5	46130.7	40176.9	44811.4	28835.1	26207.9	28923.2
ENSE00003460776	36005.6	-0.642932	0.0881504	-7.29358	3.01818e-13	3.65289e-12	chr14	73114286	73114333	ENSG00000119707	ENST00000532683	RBM25	RBM25-212	16	46130.7	40176.9	44811.4	28835.1	26207.9	28923.2
ENSE00003460776	36005.6	-0.642932	0.0881504	-7.29358	3.01818e-13	3.65289e-12	chr14	73114286	73114333	ENSG00000119707	ENST00000528081	RBM25	RBM25-207	17	46130.7	40176.9	44811.4	28835.1	26207.9	28923.2
ENSE00003460776	36005.6	-0.642932	0.0881504	-7.29358	3.01818e-13	3.65289e-12	chr14	73114286	73114333	ENSG00000119707	ENST00000532483	RBM25	RBM25-211	8	46130.7	40176.9	44811.4	28835.1	26207.9	28923.2
ENSE00003606760	36005.6	-0.642932	0.0881504	-7.29358	3.01818e-13	3.65289e-12	chr14	73114286	73114333	ENSG00000119707	ENST00000261973	RBM25	RBM25-201	18	46130.7	40176.9	44811.4	28835.1	26207.9	28923.2
ENSE00003606760	36005.6	-0.642932	0.0881504	-7.29358	3.01818e-13	3.65289e-12	chr14	73114286	73114333	ENSG00000119707	ENST00000527432	RBM25	RBM25-205	19	46130.7	40176.9	44811.4	28835.1	26207.9	28923.2
ENSE00002155624	116230	-0.698888	0.116933	-5.9768	2.2757e-09	1.95094e-08	chr14	73119713	73120129	ENSG00000119707	ENST00000532683	RBM25	RBM25-212	17	149853	135042	139052	92619.1	76897.6	91652.4
ENSE00002163409	159187	-0.712036	0.129605	-5.4939	3.93161e-08	2.94156e-07	chr14	73119713	73120391	ENSG00000119707	ENST00000527432	RBM25	RBM25-205	20	203855	184356	192839	123992	105019	125694
ENSE00002150494	130525	-0.713247	0.139667	-5.10677	3.27715e-07	2.23826e-06	chr14	73119713	73120229	ENSG00000119707	ENST00000528081	RBM25	RBM25-207	18	167512	151097	156036	103251	84558.8	101695
ENSE00002172973	305651	-0.701217	0.153307	-4.57394	4.78637e-06	2.88585e-05	chr14	73119713	73121313	ENSG00000119707	ENST00000527449	RBM25	RBM25-206	6	381457	350584	371889	237111	204060	237804
ENSE00002165155	366294	-0.66643	0.160169	-4.1608	3.17141e-05	0.000165194	chr14	73119713	73123899	ENSG00000119707	ENST00000261973	RBM25	RBM25-201	19	450637	420048	445999	291209	249982	288403
ENSE00002436078	29.757	0.130321	0.749823	0.173803	0.86202	0.897461	chr14	73136418	73136448	ENSG00000080815	ENST00000557356	PSEN1	PSEN1-222	1	43.5817	21.454	14.1298	38.846	13.6409	34.1571
ENSE00002519715	2543.86	0.583042	0.296816	1.96432	0.0494932	0.0830436	chr14	73136435	73136583	ENSG00000080815	ENST00000556864	PSEN1	PSEN1-218	1	2060.93	1831.99	2099.45	2344.47	2978.68	3652.19
ENSE00002519715	2543.86	0.583042	0.296816	1.96432	0.0494932	0.0830436	chr14	73136435	73136583	ENSG00000080815	ENST00000556533	PSEN1	PSEN1-217	1	2060.93	1831.99	2099.45	2344.47	2978.68	3652.19
ENSE00002471320	2402.56	0.577927	0.300918	1.92055	0.0547887	0.0904535	chr14	73136436	73136579	ENSG00000080815	ENST00000556951	PSEN1	PSEN1-219	1	2002.82	1726.58	1964.04	2297.63	2652.54	3547.09
ENSE00002432172	2402.56	0.577927	0.300918	1.92055	0.0547887	0.0904535	chr14	73136437	73136579	ENSG00000080815	ENST00000557293	PSEN1	PSEN1-221	1	2002.82	1726.58	1964.04	2297.63	2652.54	3547.09
ENSE00002461514	2402.56	0.577927	0.300918	1.92055	0.0547887	0.0904535	chr14	73136444	73136579	ENSG00000080815	ENST00000553719	PSEN1	PSEN1-208	1	2002.82	1726.58	1964.04	2297.63	2652.54	3547.09
ENSE00002481496	2543.86	0.583042	0.296816	1.96432	0.0494932	0.0830436	chr14	73136445	73136583	ENSG00000080815	ENST00000553599	PSEN1	PSEN1-207	1	2060.93	1831.99	2099.45	2344.47	2978.68	3652.19
ENSE00001410726	2543.86	0.583042	0.296816	1.96432	0.0494932	0.0830436	chr14	73136447	73136583	ENSG00000080815	ENST00000394157	PSEN1	PSEN1-203	1	2060.93	1831.99	2099.45	2344.47	2978.68	3652.19
ENSE00001410726	2543.86	0.583042	0.296816	1.96432	0.0494932	0.0830436	chr14	73136447	73136583	ENSG00000080815	ENST00000357710	PSEN1	PSEN1-202	1	2060.93	1831.99	2099.45	2344.47	2978.68	3652.19
ENSE00002473719	2402.56	0.577927	0.300918	1.92055	0.0547887	0.0904535	chr14	73136447	73136579	ENSG00000080815	ENST00000556011	PSEN1	PSEN1-215	1	2002.82	1726.58	1964.04	2297.63	2652.54	3547.09
ENSE00002572494	2514.1	0.588238	0.298676	1.96949	0.0488973	0.082464	chr14	73136451	73136583	ENSG00000080815	ENST00000560005	PSEN1	PSEN1-225	1	2017.35	1810.53	2085.32	2305.62	2965.04	3618.03
ENSE00002474966	2514.1	0.588238	0.298676	1.96949	0.0488973	0.082464	chr14	73136456	73136583	ENSG00000080815	ENST00000555254	PSEN1	PSEN1-212	1	2017.35	1810.53	2085.32	2305.62	2965.04	3618.03
ENSE00002517642	2372.8	0.583347	0.302545	1.92813	0.0538384	0.0893327	chr14	73136477	73136579	ENSG00000080815	ENST00000553447	PSEN1	PSEN1-206	1	1959.24	1705.13	1949.91	2258.78	2638.9	3512.93
ENSE00002470347	2514.1	0.588238	0.298676	1.96949	0.0488973	0.082464	chr14	73136496	73136583	ENSG00000080815	ENST00000554131	PSEN1	PSEN1-210	1	2017.35	1810.53	2085.32	2305.62	2965.04	3618.03
ENSE00003844041	2514.1	0.588238	0.298676	1.96949	0.0488973	0.082464	chr14	73136507	73136583	ENSG00000080815	ENST00000324501	PSEN1	PSEN1-201	1	2017.35	1810.53	2085.32	2305.62	2965.04	3618.03
ENSE00002574084	2372.8	0.583347	0.302545	1.92813	0.0538384	0.0893327	chr14	73136518	73136579	ENSG00000080815	ENST00000559361	PSEN1	PSEN1-224	1	1959.24	1705.13	1949.91	2258.78	2638.9	3512.93
ENSE00002457218	2513.63	0.587322	0.298747	1.96595	0.0493039	0.0829797	chr14	73136541	73136583	ENSG00000080815	ENST00000557037	PSEN1	PSEN1-220	1	2017.35	1810.53	2085.32	2303.34	2962.56	3617.15
ENSE00001517657	3567.88	0.277865	0.173462	1.60188	0.109182	0.164121	chr14	73136817	73137223	ENSG00000080815	ENST00000394164	PSEN1	PSEN1-204	1	3052.65	3467.16	3360.53	3626.39	3908.74	4442.18
ENSE00002520779	2960.01	0.15831	0.151936	1.04195	0.297434	0.388861	chr14	73137125	73137223	ENSG00000080815	ENST00000556864	PSEN1	PSEN1-218	2	2593.59	3003.57	2914.26	3056.26	3245.3	3196.76
ENSE00002520779	2960.01	0.15831	0.151936	1.04195	0.297434	0.388861	chr14	73137125	73137223	ENSG00000080815	ENST00000557037	PSEN1	PSEN1-220	2	2593.59	3003.57	2914.26	3056.26	3245.3	3196.76
ENSE00002449655	112.253	-0.0114477	0.534341	-0.021424	0.982907	0.987708	chr14	73138107	73138152	ENSG00000080815	ENST00000556011	PSEN1	PSEN1-215	2	130.745	149.246	83.6011	44.5586	142.61	173.413
ENSE00002516744	112.253	-0.0114477	0.534341	-0.021424	0.982907	0.987708	chr14	73138112	73138152	ENSG00000080815	ENST00000554131	PSEN1	PSEN1-210	2	130.745	149.246	83.6011	44.5586	142.61	173.413
ENSE00002516744	112.253	-0.0114477	0.534341	-0.021424	0.982907	0.987708	chr14	73138112	73138152	ENSG00000080815	ENST00000557037	PSEN1	PSEN1-220	3	130.745	149.246	83.6011	44.5586	142.61	173.413
ENSE00002516744	112.253	-0.0114477	0.534341	-0.021424	0.982907	0.987708	chr14	73138112	73138152	ENSG00000080815	ENST00000553447	PSEN1	PSEN1-206	2	130.745	149.246	83.6011	44.5586	142.61	173.413
ENSE00003515981	2.31704	-1.73795	2.68903	-0.646311	0.518078	0.606512	chr14	73139297	73139398	ENSG00000080815	ENST00000560005	PSEN1	PSEN1-225	2	0.968482	0	8.24236	0	0	2.62747
ENSE00002434544	20.8859	-7.56436	1.97861	-3.82308	0.000131798	0.000611095	chr14	73146078	73146126	ENSG00000080815	ENST00000557037	PSEN1	PSEN1-220	4	64.8883	26.118	21.1946	0	0	0
ENSE00002444833	15873.6	0.137536	0.138753	0.991231	0.321573	0.413846	chr14	73147492	73147876	ENSG00000080815	ENST00000556066	PSEN1	PSEN1-216	1	14833.3	14254.8	14543.1	15117.9	17326.5	15552
ENSE00002441456	15864.3	0.137419	0.139011	0.988546	0.322885	0.415211	chr14	73147753	73147876	ENSG00000080815	ENST00000553599	PSEN1	PSEN1-207	2	14822.6	14253.9	14539.5	15112.2	17317.8	15545.9
[truncated: 2,109 more rows]
