# Supplementary material for: A hidden layer of structural variation in transposable elements reveals potential genetic modifiers in human disease-risk loci
Source: HighWire-hosted journal article supplement (doi:10.1101/gr.275515.121), 2022-03-24
Supplement: Supplemental_Table_S5.xlsx [file Supplemental_Table_S5.xlsx]

## Sheet: README
Supplemental Table S5: Data corresponding to LD block analysis.
File contains input data downloaded from the GWAS catalog that was used to calculate LD blocks with the SNiPA Block Annotation tool (Arnold et al. 2015).
It also contains lists of LD blocks where overlapping blocks are removed (only one SNP indicator per block shown), and shows genomic location of blocks overlapping with an (SV-)SVA.

## Sheet: PD_hg38
SVAs bigger than 1000bp in LD block hg38:									LD block
chrom	start	stop	name	name hg19	score	strand	SV in data Audano 2019	size	LD chrom	LD start	LD stop	associated SNPs p≤1e-8 overlapping with LD block	GTExPortal eQTL
chr1	171693139	171694693	SVA_C	SVA_C	972		NO	1554	chr1	171680319	171759843	rs11578699
chr2	95242814	95244355	SVA_D	SVA_D	971	+	NO	1541	chr2	95050123	95349993	rs2042477
chr3	48733473	48735453	SVA_D	SVA_D	977	+	NO	1980	chr3	48685870	49151762	rs12497850
chr4	975364	976542	SVA_E	SVA_E	960	+	NO	1178	chr4	905565	995760	rs873786,rs6599388,rs34311866,rs11248060
chr4	169678415	169679948	SVA_B	SVA_B	954		NO	1533	chr4	169642796	169711869	rs62333164
chr6	32384190	32386122	SVA_D	SVA_D	976		YES	1932	chr6	32378115	32465290	rs2395163,rs3129882
chr6	32531533	32532999	SVA_B	SVA_B	945	+	YES, full deletion and SV	1466	chr6	32487942	32641945	rs17425622,(rs112485576)	rs112485576 not found
chr6	32594194	32596780	SVA_F	SVA_F	925		YES, full deletion and SV	2586	chr6	32487942	32641945	rs17425622,(rs112485576)
chr7	66392678	66395116	SVA_E	SVA_E	977		full deletion	2438	chr7	66064572	66637726	rs76949143
chr7	66614054	66615506	SVA_C	SVA_C	962	+	NO	1452	chr7	66064572	66637726	rs76949143
chr9	34038300	34039864	SVA_C	SVA_C	964	+	NO	1564	chr9	33778402	34046810	rs6476434
chr10	119794026	119796112	SVA_D	SVA_D	914		YES	2086	chr10	119776816	119950976	rs117896735	No significant eQTLs
chr11	57943192	57944632	SVA_B	SVA_B	967		YES	1440	chr11	57921739	58094195	rs687432
chr12	32562415	32564061	SVA_D	SVA_D	972		NO	1646	chr12	32556040	32657825	rs181609621
chr16	31103602	31105709	SVA_D	SVA_D	876	+	YES	2107	chr16	30999863	31137821	rs14235
chr17	44237441	44239560	SVA_D	SVA_D	934	+	NO	2119	chr17	44216831	44248890	rs2269906
chr17	46252374	46253788	SVA_D	SVA_D	944		NO	1414	chr17	46107463	46259631	rs17577094,rs7225002
									chr17	46252740	46784981	rs199453,rs199533,rs199515
Smaller SVAs present on hg19 (location shown for hg38)
chr4	854116	854262	SVA_E	SVA_E	973	-	NO	146	chr4	849887	949045	rs11248051,rs35541465,rs873786,rs6599388
chr17	46237576	46238225	SVA_F	SVA_F	992	-	YES	649	chr17	46107463	46259631	rs17577094,rs7225002
chr17	46316611	46317178	SVA_C	SVA_C	979	-	YES	567	chr17	46252740	46784981	rs199453,rs199533,rs199515
chr17	46534195	46535048	SVA_C	SVA_C	949	-	NO	853	chr17	46252740	46784981	rs199453,rs199533,rs199515
chr17	62020688	62021534	SVA_D	SVA_D	961	-	YES	846	chr17	61821839	62088435	rs61169879
chr17	62072983	62073633	SVA_B	SVA_B	971	+	NO	650	chr17	61821839	62088435	rs61169879

## Sheet: AD_hg38
SVAs bigger than 1000bp in LD block:								LD block
chrom	start	stop	name	name hg19	score	strand	SV in data Audano 2019	LD chrom	LD start	LD stop	associated SNPs p≤1e-8 overlapping with LD block	GTExPortal eQTL
chr2	127118897	127120492	SVA_F		919	-	YES	chr2	127088930	127132356	rs13025717, rs12989701, rs7561528
chr3	57338000	57339393	SVA_A		926	+	NO	chr3	57192123	57644165	rs184384746	no sig eQTL
chr6	32531533	32532999	SVA_B		945	+	YES, full deletion and SV	chr6	32487942	32641945	rs9271192, rs6931277
chr6	32594194	32596780	SVA_F		925	-	YES, full deletion and SV	chr6	32487942	32641945	rs9271192, rs6931277
chr6	47505039	47506780	SVA_C	SVA_F	956	-	YES	chr6	47459546	47624729	rs9381563, rs9349407, rs10948363
chr6	58190028	58191451	SVA_B		920	+	NO	chr6	58045671	58402135	rs1936246
chr6	58257132	58258594	SVA_C		912	+	NO	chr6	58045671	58402135	rs1936246
chr11	47892272	47894243	SVA_B		808	+	YES	chr11	47413436	47908294	rs10838725
chr11	60200313	60201870	SVA_D		920	-	YES	chr11	60090109	60273823	rs983392, rs11605427, rs610932, rs7935829, rs2081545, rs1582763, rs1562990, rs4938933
chr11	86109791	86112144	SVA_C	SVA_D	951	+	YES	chr11	85959903	86147496	rs867611, rs536841, rs561655
chr17	63455804	63457690	SVA_D		939	+	NO	chr17	63422372	63466205	rs138190086	no sig eQTL
chr19	44488222	44489755	SVA_D		961	+	YES	chr19	44426045	44900801	rs80257887,rs75161053,rs73046410,rs846876,rs11083743,rs539159088,rs10426401,rs56261258,rs203709,rs2965164,rs11881756,rs79638902,rs73037426,rs111740474,rs150820726,rs186110295,rs55923289,rs4803748,rs4803750,rs2965169,rs10401176,rs114036675,rs2967668,rs140824606,rs142092405,rs28399637,rs28399664,rs10405693,rs58826447,rs10402271,rs78986976,rs547509922,rs10407439,rs55840414,rs111371860,rs148601586,rs…
chr19	44921083	44922451	SVA_D		905	-	NO	chr19	44902243	44924522	rs141864196,rs7259620,rs449647,rs405509,rs440446,rs769449,rs769450,rs429358,rs7412,rs1081105,rs439401,rs483082,rs584007,rs3925681,rs56131196,rs4420638,rs157595,rs141622900

## Sheet: PD_hg19
LD blocks						SVAs
chrom	start	stop	SNP			chrom	start	stop	name	score	strand	size
chr1	171649458	171728983	rs11578699			chr1	171662278	171663833	SVA_C	388	-	1555
chr2	95715867	96015741	rs2042477			chr2	95908561	95910103	SVA_D	368	+	1542
chr3	48723302	49189195	rs12497850			chr3	48770905	48772886	SVA_D	388	+	1981
chr4	843674	942833	rs11248051			chr4	847903	848050	SVA_E	187	-	147
chr4	899352	989548	rs11248060			chr4	969151	970330	SVA_E	187	+	1179
chr4	170563946	170633020	rs62333164			chr4	170599574	170601099	SVA_B	377	-	1525
chr6	32455718	32609722	rs112485576			chr6	32351966	32353899	SVA_D	334	-	1933
chr6	32345891	32433067	rs2395163			chr6	32499309	32500773	SVA_B	383	+	1464
chr7	65529558	66102713	rs76949143			chr6	32561970	32564606	SVA_F	381	-	2636
chr9	33778399	34046808	rs6476434			chr7	65857664	65860103	SVA_E	378	-	2439
chr10	121536327	121710488	rs117896735			chr7	66079040	66080493	SVA_C	378	+	1453
chr11	57689210	57861667	rs687432			chr9	34038297	34039862	SVA_C	125	+	1565
chr12	32708973	32810759	rs181609621			chr10	121553537	121555624	SVA_D	42	-	2087
chr16	31011183	31149142	rs14235			chr11	57710663	57712104	SVA_B	410	-	1441
chr17	44184828	44336997	rs7225002			chr12	32715348	32716995	SVA_D	122	-	1647
chr17	44330105	44862347	rs199533			chr16	31114922	31117030	SVA_D	320	+	2108
chr17	44346674	44862613	rs199453			chr17	42314762	42316928	SVA_D	347	+	2166
chr17	59899199	60165796	rs61169879			chr17	44314941	44315588	SVA_F	347	-	647
chr17	42294198	42326258	rs2269906			chr17	44329739	44331154	SVA_D	347	-	1415
						chr17	44393979	44394544	SVA_C	347	-	565
						chr17	44611563	44612415	SVA_C	347	-	852
						chr17	60098048	60098895	SVA_D	380	-	847
						chr17	60150343	60150994	SVA_B	380	+	651

## Sheet: AD_hg19
LD blocks						SVAs
chrom	start	stop	SNP			chrom	start	stop	name	score	strand	size
chr2	127846505	127889932	rs12989701			chr2	127876472	127878068	SVA_F	313	-	1596
chr3	57226150	57629892	rs184384746			chr3	57372027	57373421	SVA_A	302	+	1394
chr6	58371948	58728413	rs1936246			chr6	32499309	32500773	SVA_B	383	+	1464
chr6	32455718	32609722	rs6931277			chr6	32561970	32564606	SVA_F	381	-	2636
chr6	47427281	47592465	rs10948363			chr6	47472762	47474516	SVA_F	394	-	1754
chr11	47434986	47929846	rs10838725			chr6	58516329	58517729	SVA_B	377	+	1400
chr11	59856028	59968741	rs610932			chr6	58583367	58584872	SVA_C	377	+	1505
chr11	59857581	60041296	rs11605427			chr11	47913823	47915299	SVA_B	410	+	1476
chr11	85670945	85858538	rs561655			chr11	59967785	59969343	SVA_D	371	-	1558
chr17	61499732	61543566	rs138190086			chr11	85820832	85823186	SVA_D	379	+	2354
chr19	44930216	45404058	rs142412517			chr17	61533164	61535051	SVA_D	380	+	1887
chr19	45405499	45427779	rs141864196			chr19	44992353	44993844	SVA_D	116	+	1491
						chr19	45424339	45425280	SVA_D	376	-	941

## Sheet: hg19_Schizophrenia
SVAs							total LD blocks	470
chrom	start	stop	name	score	strand	size	overlap	59
chr1	78334617	78336825	SVA_E	122	-	2208	percentage	12.5532
chr1	97227294	97229186	SVA_D	408	-	1892
chr1	159418941	159420250	SVA_C	387	+	1309
chr1	211633171	211634821	SVA_D	120	+	1650
chr2	172722362	172724171	SVA_D	409	-	1809
chr2	172755714	172757482	SVA_D	409	+	1768
chr2	193758178	193759676	SVA_B	303	+	1498
chr2	198482775	198484476	SVA_D	303	+	1701
chr2	198560177	198562182	SVA_D	303	-	2005
chr2	198786730	198788860	SVA_F	303	-	2130
chr2	233769785	233771888	SVA_D	389	+	2103
chr3	48102670	48104004	SVA_C	398	+	1334
chr3	17745409	17747393	SVA_F	387	-	1984
chr3	47992805	47994129	SVA_D	394	+	1324
chr3	48096671	48099115	SVA_F	398	+	2444
chr3	50121077	50123316	SVA_D	388	-	2239
chr3	50348025	50350395	SVA_D	382	-	2370
chr3	136441506	136443460	SVA_D	338	+	1954
chr4	170599574	170601099	SVA_B	377	-	1525
chr5	60500944	60501152	SVA_F	360	+	208
chr5	87672680	87672817	SVA_F	403	+	137
chr5	109167874	109169419	SVA_B	311	-	1545
chr5	152675155	152677401	SVA_D	319	-	2246
chr6	27451874	27454207	SVA_F	386	-	2333
chr6	27497149	27497852	SVA_B	386	-	703
chr6	27620654	27622181	SVA_B	386	+	1527
chr6	27794739	27796292	SVA_D	339	-	1553
chr6	28469291	28470908	SVA_B	339	+	1617
chr6	29685486	29688054	SVA_E	377	+	2568
chr6	29863163	29864226	SVA_C	377	-	1063
chr6	29899807	29901531	SVA_D	377	+	1724
chr6	30189273	30190470	SVA_A	377	-	1197
chr6	30442224	30443776	SVA_D	377	+	1552
chr6	30465936	30467110	SVA_B	377	-	1174
chr6	30960346	30961771	SVA_D	377	-	1425
chr6	31034379	31035833	SVA_C	377	-	1454
chr6	31211637	31213099	SVA_F	399	+	1462
chr6	31421528	31424330	SVA_D	359	-	2802
chr6	31943432	31944815	SVA_D	334	-	1383
chr6	32351966	32353899	SVA_D	334	-	1933
chr6	32499309	32500773	SVA_B	383	+	1464
chr6	32561970	32564606	SVA_F	381	-	2636
chr6	33452841	33454399	SVA_D	381	-	1558
chr6	105438437	105439902	SVA_C	390	-	1465
chr6	165156588	165158098	SVA_C	361	-	1510
chr7	105050468	105052241	SVA_D	380	-	1773
chr8	34385526	34387722	SVA_D	372	-	2196
chr9	85045829	85046707	SVA_F	350	-	878
chr10	104887801	104890330	SVA_F	404	+	2529
chr10	106544661	106544872	SVA_F	1694	-	211
chr10	106544872	106545359	SVA_F	404	+	487
chr11	17071144	17073074	SVA_F	368	-	1930
chr11	46606606	46606935	SVA_D	148	+	329
chr11	57483053	57485225	SVA_D	410	-	2172
chr11	113394356	113395538	SVA_A	400	+	1182
chr12	14506970	14508474	SVA_C	325	+	1504
chr12	56468875	56470558	SVA_F	375	-	1683
chr12	121169462	121171069	SVA_C	396	-	1607
chr12	123856249	123857401	SVA_A	303	+	1152
chr15	78812597	78813341	SVA_D	378	-	744
chr15	85215474	85216662	SVA_D	378	+	1188
chr16	28708506	28710833	SVA_F	394	-	2327
chr16	28748475	28749896	SVA_B	394	-	1421
chr16	28790917	28792548	SVA_D	394	-	1631
chr17	2158830	2159517	SVA_D	293	+	687
chr17	17814965	17816540	SVA_D	364	-	1575
chr18	12979066	12981518	SVA_D	397	-	2452
chr18	13097648	13099213	SVA_D	397	-	1565
chr20	47551634	47553061	SVA_D	394	-	1427
						110136
LD blocks
chrom	start	stop	SNP
chr1	159171152	159518892	rs2814778
chr1	78305492	78508309	rs4130548
chr1	97113731	97284496	rs12031518
chr1	211551878	211635669	rs35771425
chr2	193742529	194006277	rs17656017
chr2	172672624	172882178	rs13004237
chr2	198187903	198588950	rs2565164
chr2	198494111	198940251	rs1518367
chr2	198594185	198952637	rs1837495
chr2	233736244	233793736	rs778371
chr2	233767037	233806771	rs2944591
chr3	50291785	50409826	rs2073499
chr3	135814009	136508008	rs66691851
chr3	17296356	17808236	rs4908972
chr3	47588649	48123796	rs7429990
chr3	49897830	50174848	rs4688756
chr3	50350376	50796834	rs374528934
chr4	170546431	170646003	rs10520163
chr5	109030041	109182919	rs4388249
chr5	87520595	87775691	rs247910
chr5	152587913	152705483	rs13176930
chr5	60484179	60513501	rs171748
chr6	26582035	27564879	rs55834529
chr6	27054772	27798887	rs13212562
chr6	27141904	28119055	rs141342723
chr6	27806985	28806303	rs13217619
chr6	28169241	29167575	rs116137698
chr6	29549653	30515043	rs8321
chr6	29970960	30761572	rs114200269
chr6	30299245	30985828	rs116396069
chr6	31016550	31566168	rs116509918
chr6	32218120	32666526	rs115035678
chr6	27309779	28304384	rs34706883
chr6	33395199	33453594	rs9461856
chr6	105364421	105475254	rs160593
chr6	165066062	165165989	rs4479915
chr6	31922254	31947460	rs389883
chr7	104600854	105051200	rs41563
chr7	104624626	105052959	rs2057884
chr8	33998571	34678632	rs80318442
chr9	85002481	85100739	rs2026194
chr10	104591393	104960464	rs10883832
chr10	106544216	106571608	rs61867293
chr11	57421457	57679080	rs11570190
chr11	17066618	17285807	rs4356203
chr11	46352266	46730043	rs11038927
chr11	113394035	113424042	rs4309187
chr12	123409705	123909289	rs61041384
chr12	14483481	14651798	rs11055980
chr12	121082228	121216911	rs78885399
chr12	56369506	56482180	rs7302200
chr15	84962526	85258203	rs71395455
chr15	85163605	85383640	rs12908161
chr15	78802586	78858400	rs28437878
chr16	28702943	28919341	rs7359397
chr17	2095954	2209888	rs58146172
chr17	17757728	18029857	rs11658257
chr18	12947462	13154354	rs3809912
chr20	47531817	47815227	rs348276

## Sheet: hg19_BD
SVAs							total LD blocks	151
chrom	start	stop	name	score	strand	size	overlap	21
chr1	96934652	96936203	SVA_D	408	-	1551	percentage	13.9073
chr2	198560177	198562182	SVA_D	303	-	2005
chr2	198786730	198788860	SVA_F	303	-	2130
chr3	136441506	136443460	SVA_D	338	+	1954
chr5	87672680	87672817	SVA_F	403	+	137
chr6	27497149	27497852	SVA_B	386	-	703
chr6	27620654	27622181	SVA_B	386	+	1527
chr6	27794739	27796292	SVA_D	339	-	1553
chr6	28469291	28470908	SVA_B	339	+	1617
chr6	29685486	29688054	SVA_E	377	+	2568
chr6	29863163	29864226	SVA_C	377	-	1063
chr6	29899807	29901531	SVA_D	377	+	1724
chr6	30189273	30190470	SVA_A	377	-	1197
chr6	30442224	30443776	SVA_D	377	+	1552
chr6	30465936	30467110	SVA_B	377	-	1174
chr6	31421528	31424330	SVA_D	359	-	2802
chr7	105050468	105052241	SVA_D	380	-	1773
chr8	34385526	34387722	SVA_D	372	-	2196
chr10	104887801	104890330	SVA_F	404	+	2529
chr10	106544661	106544872	SVA_F	1694	-	211
chr10	106544872	106545359	SVA_F	404	+	487
chr11	17071144	17073074	SVA_F	368	-	1930
chr11	46606606	46606935	SVA_D	148	+	329
chr11	57483053	57485225	SVA_D	410	-	2172
chr12	123856249	123857401	SVA_A	303	+	1152
chr15	42893064	42893835	SVA_B	398	-	771
chr15	85215474	85216662	SVA_D	378	+	1188
chr16	28388029	28389477	SVA_B	394	+	1448
chr16	28427205	28429159	SVA_F	394	+	1954
chr16	28459272	28460903	SVA_D	394	+	1631
chr16	28708506	28710833	SVA_F	394	-	2327
chr16	28748475	28749896	SVA_B	394	-	1421
chr16	28790917	28792548	SVA_D	394	-	1631
chr16	53572452	53574158	SVA_D	320	+	1706
chr16	53658692	53660070	SVA_B	320	+	1378
chr16	53731234	53733318	SVA_D	320	+	2084
						55575
LD blocks
chrom	start	stop	SNP
chr1	96882671	97027749	rs2968487
chr2	198494111	198940251	rs1518367
chr3	135911172	136508008	rs7618871
chr5	87520595	87775691	rs247910
chr6	27806985	28806303	rs13217619
chr6	29549653	30515043	rs8321
chr6	27474715	27837183	rs17693963
chr6	31326151	31426399	rs9378249
chr7	104624626	105052959	rs2057884
chr8	33998571	34678632	rs80318442
chr10	104591393	104960464	rs10883832
chr10	106544216	106571608	rs61867293
chr11	57421457	57679080	rs11570190
chr11	17066618	17285807	rs4356203
chr11	46352266	46730043	rs61882743
chr12	123460719	123885974	rs1615350
chr15	84962526	85258203	rs71395455
chr15	42873672	42904904	rs4447398
chr16	28388507	28649651	rs151181
chr16	28702943	28919341	rs3888190
chr16	53563327	53738283	rs1477199

## Sheet: hg19_ALS
SVAs							total LD blocks	15
chrom	start	stop	name	score	strand	size	overlap	1
chr10	94433484	94435736	SVA_F	393	-	2252	percentage	6.66667
LD blocks
chrom	start	stop	SNP
chr10	94202645	94492407	rs139550538

## Sheet: hg19_neuroblastoma
SVAs							total LD blocks	9
chrom	start	stop	name	score	strand	size	overlap	1
chr6	105438437	105439902	SVA_C	390	-	1465	percentage	11.1111
LD blocks
chrom	start	stop	SNP
chr6	105357487	105480816	rs17065417

## Sheet: hg19_Autisme
SVAs							total LD blocks	178
chrom	start	stop	name	score	strand	size	overlap	28
chr2	198482775	198484476	SVA_D	303	+	1701	percentage	15.7303
chr2	198560177	198562182	SVA_D	303	-	2005
chr2	198786730	198788860	SVA_F	303	-	2130
chr2	233769785	233771888	SVA_D	389	+	2103
chr3	136441506	136443460	SVA_D	338	+	1954
chr4	170599574	170601099	SVA_B	377	-	1525
chr5	60500944	60501152	SVA_F	360	+	208
chr5	87672680	87672817	SVA_F	403	+	137
chr6	27451874	27454207	SVA_F	386	-	2333
chr6	27497149	27497852	SVA_B	386	-	703
chr6	27620654	27622181	SVA_B	386	+	1527
chr6	27794739	27796292	SVA_D	339	-	1553
chr6	28469291	28470908	SVA_B	339	+	1617
chr6	29685486	29688054	SVA_E	377	+	2568
chr6	29863163	29864226	SVA_C	377	-	1063
chr6	29899807	29901531	SVA_D	377	+	1724
chr6	30189273	30190470	SVA_A	377	-	1197
chr6	30442224	30443776	SVA_D	377	+	1552
chr6	30465936	30467110	SVA_B	377	-	1174
chr6	30960346	30961771	SVA_D	377	-	1425
chr6	31034379	31035833	SVA_C	377	-	1454
chr6	31211637	31213099	SVA_F	399	+	1462
chr6	31421528	31424330	SVA_D	359	-	2802
chr6	32351966	32353899	SVA_D	334	-	1933
chr6	32499309	32500773	SVA_B	383	+	1464
chr6	32561970	32564606	SVA_F	381	-	2636
chr6	33452841	33454399	SVA_D	381	-	1558
chr7	105050468	105052241	SVA_D	380	-	1773
chr8	34385526	34387722	SVA_D	372	-	2196
chr10	104887801	104890330	SVA_F	404	+	2529
chr10	106544661	106544872	SVA_F	1694	-	211
chr10	106544872	106545359	SVA_F	404	+	487
chr11	46606606	46606935	SVA_D	148	+	329
chr11	57483053	57485225	SVA_D	410	-	2172
chr11	113394356	113395538	SVA_A	400	+	1182
chr12	123856249	123857401	SVA_A	303	+	1152
chr15	85215474	85216662	SVA_D	378	+	1188
chr17	2158830	2159517	SVA_D	293	+	687
						57414
LD blocks
chrom	start	stop	SNP
chr2	198189346	198588950	rs6434928
chr2	198494111	198940251	rs1518367
chr2	233767037	233806771	rs2944591
chr3	135911172	136508008	rs7618871
chr4	170546431	170646003	rs10520163
chr5	87520595	87775691	rs247910
chr5	60484179	60513501	rs171748
chr6	27054772	27798887	rs13212562
chr6	27141904	28119055	rs141342723
chr6	27806985	28806303	rs13217619
chr6	28169241	29167575	rs116137698
chr6	29549653	30515043	rs8321
chr6	31016550	31566168	rs140502984
chr6	32218120	32666526	rs115035678
chr6	33395199	33453594	rs9461856
chr6	30936534	30982008	rs116502302
chr7	104600854	105051200	rs41563
chr7	104624626	105052959	rs2057884
chr8	33998571	34678632	rs80318442
chr10	104591393	104960464	rs10883832
chr10	106544216	106571608	rs61867293
chr11	57421457	57679080	rs11570190
chr11	46352266	46730043	rs35324223
chr11	113394035	113424042	rs4309187
chr12	123460719	123885974	rs1615350
chr15	84962526	85258203	rs71395455
chr15	85163605	85383640	rs35828350
chr17	2096441	2209888	rs4523957

[truncated: 20 more sheets: hg19_MS, AD_GWAS_download, AD_selection_and_blocks, AD_blocks_filtered, PD_GWAS_download, PD_selection_and_blocks, PD_blocks_filtered, ALS_GWAS_download_and_blocks, ALS_blocks_filtered, Autism_GWAS_downlaod, Autism_blocks_over1bp, Autism_blocks_filtered, BD_GWAS_download_and_blocks, BD_blocks_filtered, MS_GWAS_download, MS_blocks_filtered, Neurobl_GWAS_download_and_block, Neuroblastoma_blocks_filtered, Schiz_GWA_download, Schiz_LD_blocks_filtered]
